# Supplementary material
Source: PubMed Central journal article supplement (PMC4508124)
Supplement: NIHMS707346-supplement-Supp_Info.pdf [file NIHMS707346-supplement-Supp_Info.pdf]

## Supporting Information

### **Structural Insight into Tetrameric hTRPV1 from Homology Modeling, Molecular Docking, Molecular Dynamics Simulation, Virtual Screening, and Bioassay Validations**

Zhiwei Feng,<sup>†,‡,§</sup> Larry V. Pearce,<sup>⊥</sup> Xiaomeng Xu,<sup>†,‡,§</sup> Xiaole Yang,<sup>†,‡,§</sup> Peng Yang,<sup>†,‡,§</sup>  
Peter M. Blumberg,<sup>\*,⊥</sup> and Xiang-Qun Xie<sup>\*,†,‡,§,||</sup>

<sup>†</sup> Department of Pharmaceutical Sciences and Computational Chemical Genomics Screening Center, School of Pharmacy, <sup>‡</sup> NIDA National Center of Excellence for Computational Drug Abuse Research, <sup>§</sup> Drug Discovery Institute, and <sup>||</sup> Departments of Computational Biology and of Structural Biology, University of Pittsburgh, Pittsburgh, Pennsylvania 15261, United States

<sup>⊥</sup> Laboratory of Cancer Biology and Genetics, National Cancer Institute, Bethesda, Maryland 20892, United States

\*Phone: 412-383-5276. Fax: 412-383-7436. E-mail: xix15@pitt.edu. Corresponding author address: 3501 Terrace Street, 529 Salk Hall, University of Pittsburgh, Pittsburgh, PA 15261, U.S.A.

\*Phone: 301-496-3189. Fax: 301-496-8709. E-mail: blumberp@dc37a.nci.nih.gov. Corresponding author address: Laboratory of Cancer Biology and Genetics, National Cancer Institute, National Institutes of Health, Building 37, Room 4048B, 37 Convent Drive MSC 4255, Bethesda, MD 20892-4255, U.S.A.





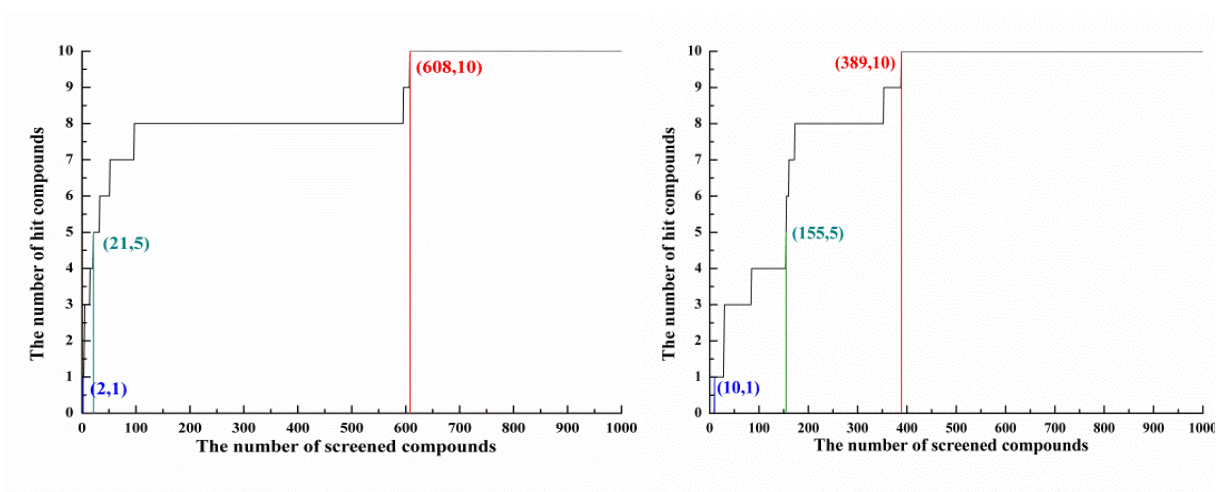

(a)

(b)

**Figure S3.** Correlation between the number of hit compounds identified and the number of compounds screened for the other two hTRPV1 models.

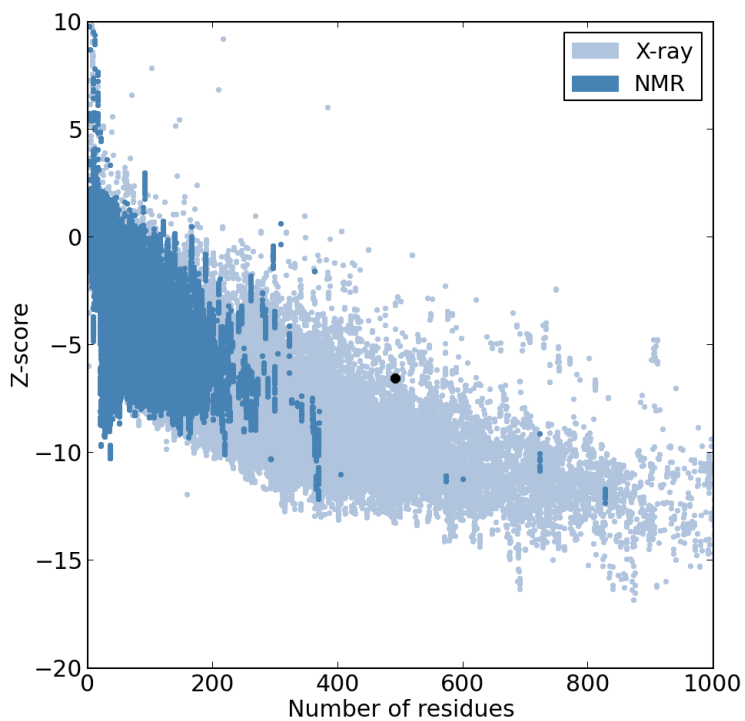

**Figure S4.** Overall model quality of hTRPV1 model constructed by rTRPV1. The Z-score was -6.57.

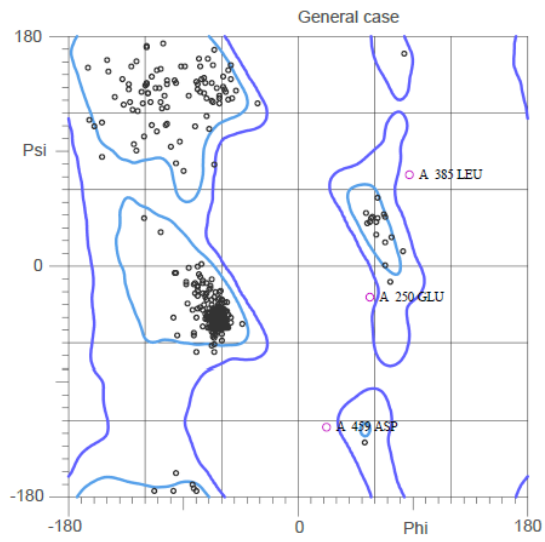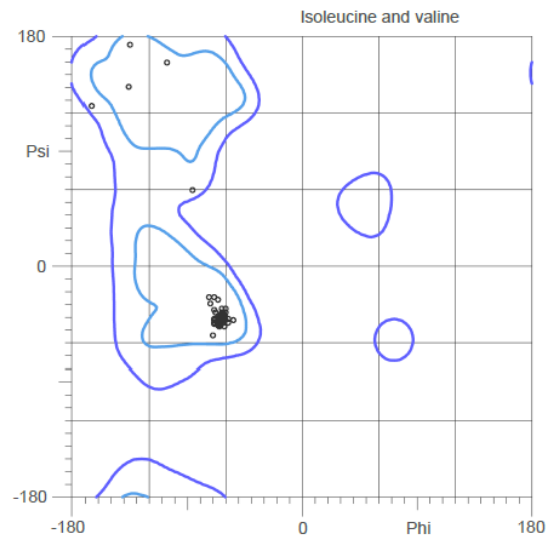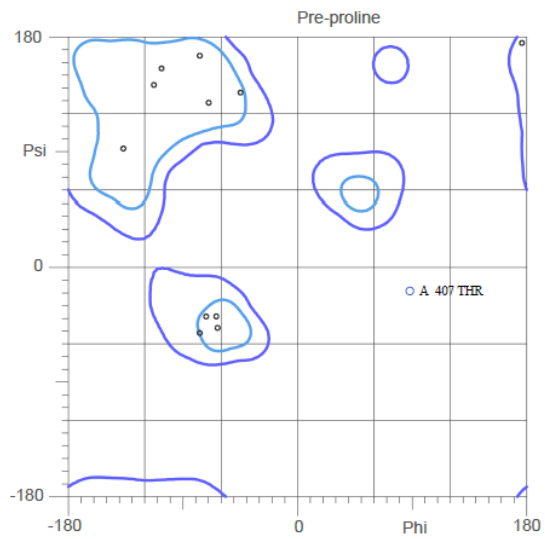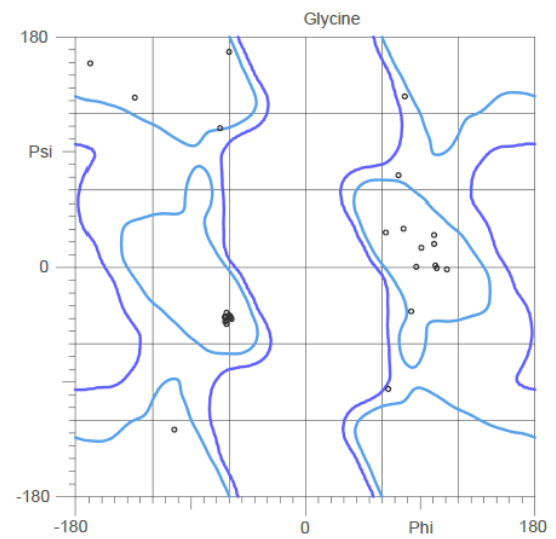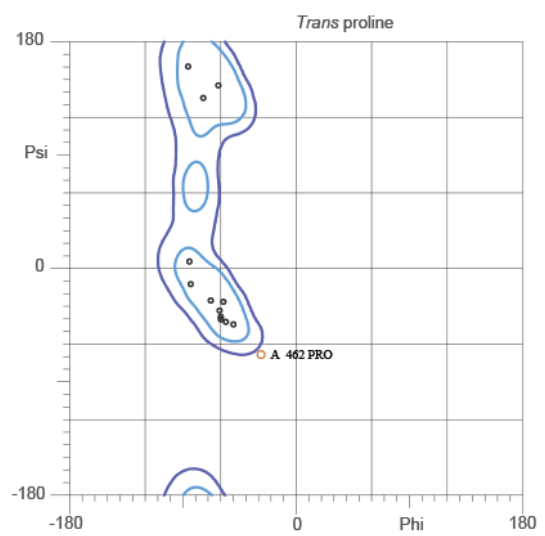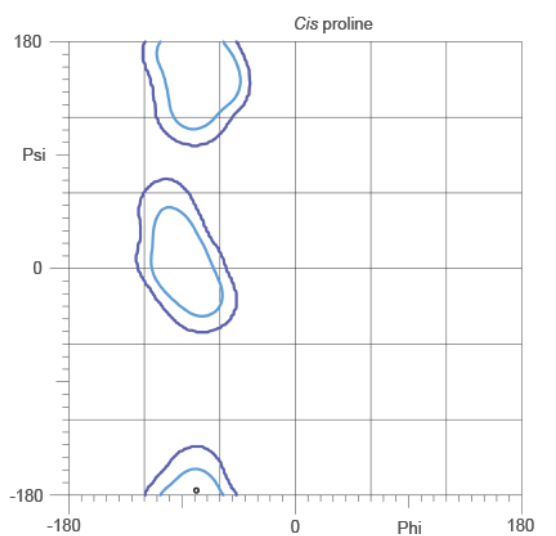

**Figure S5.** Ramachandran plots of hTRPV1 model constructed by rTRPV1. 95.5% (554/580) of all residues were in favored regions. 99.1% (575/580) of all residues were in allowed regions. There were 5 outliers (phi, psi): Glu250 (56.0, -24.3), Leu385 (88.0, 72.8), Thr407 (88.0, -19.7), Asp459 (22.4, -126.2), Pro462 (-28.9, -68.7).

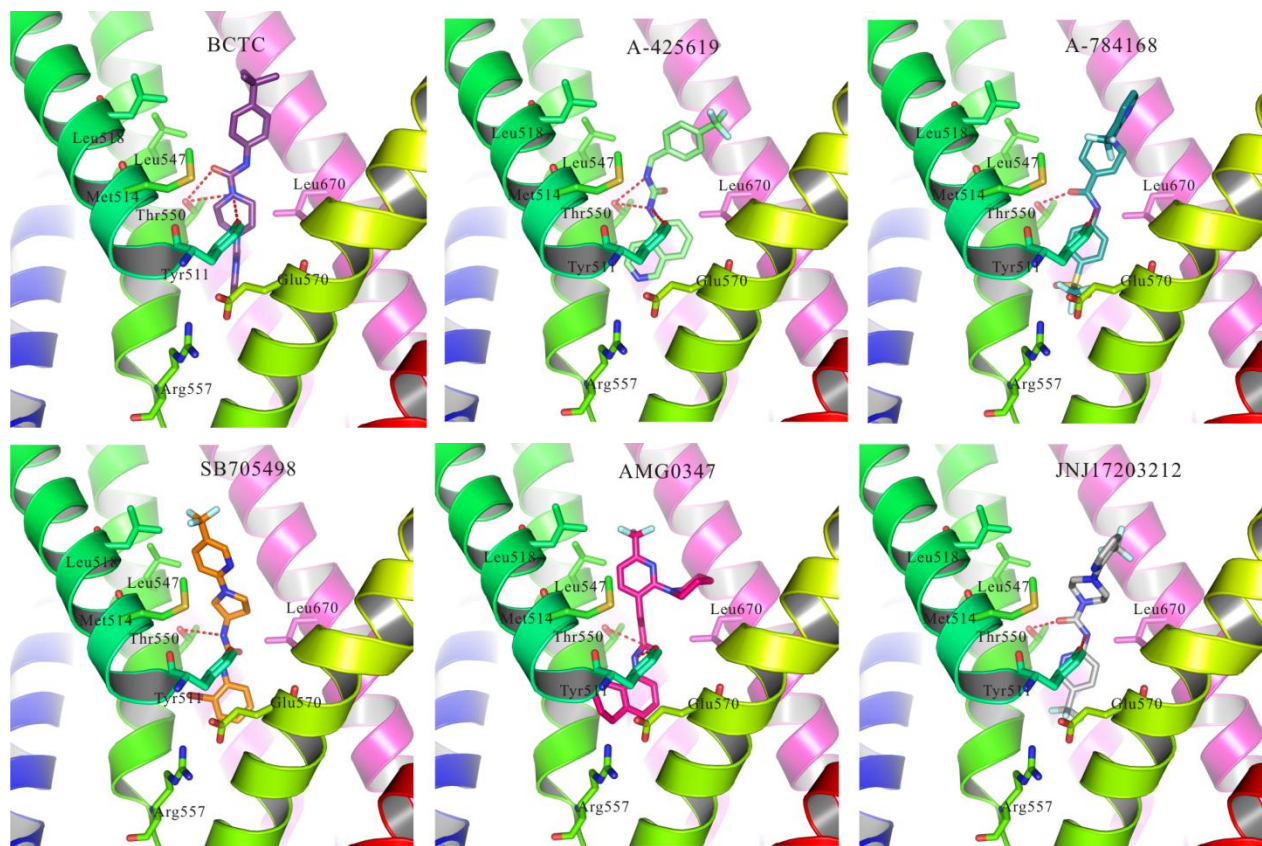

**Figure S6.** Detailed binding modes of other six antagonists with hTRPV1, including BCTC, A-425619, A-784168, SB705498, AMG0347, and JNJ17203212. Two residues, Tyr511 and Thr550, formed strong hydrogen bonds with the antagonists.

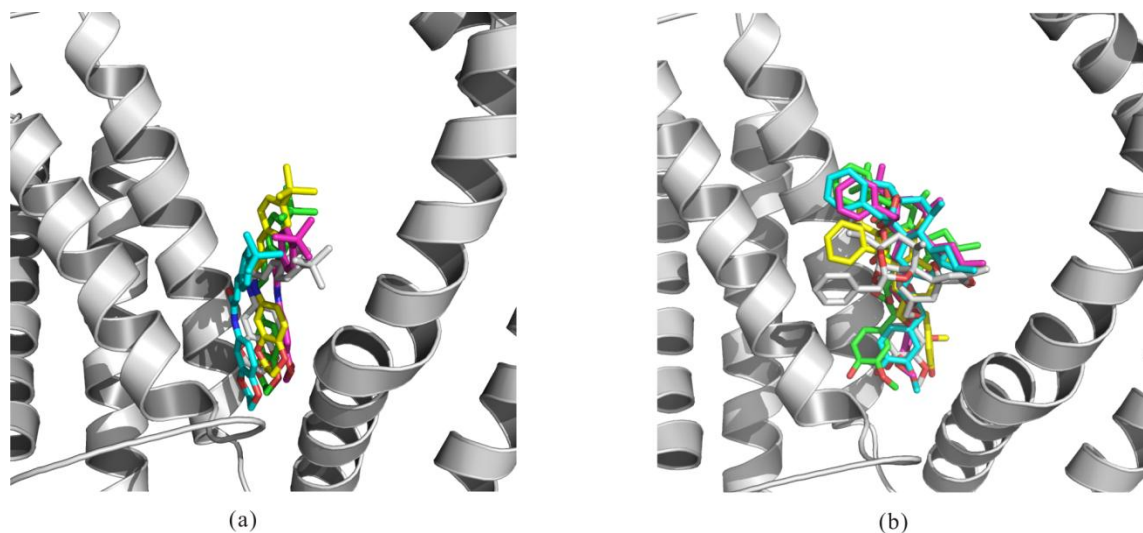

**Figure S7.** Alignments of (a) four AMG9810 and (b) of four RTX after MD simulation. The hTRPV1 and its compounds before MD simulation were highlighted in gray, while the four AMG9810 and four RTX in different monomers were highlighted in colors.

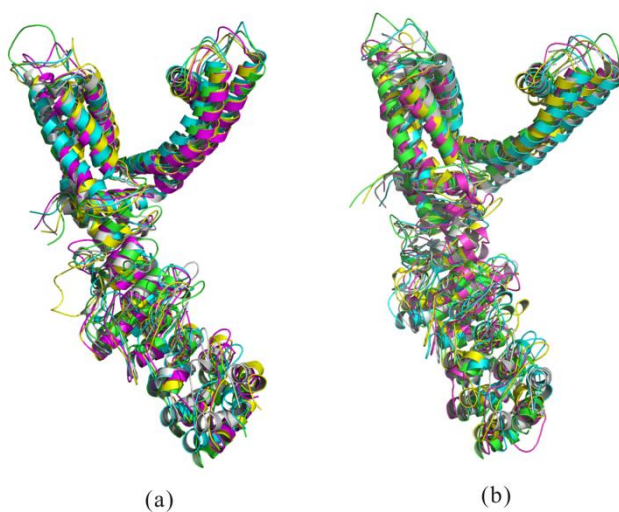

**Figure S8.** Alignments of four monomers (or units) (a) of hTRPV1 bound with AMG9810 and (b) of hTRPV1 bound with RTX.



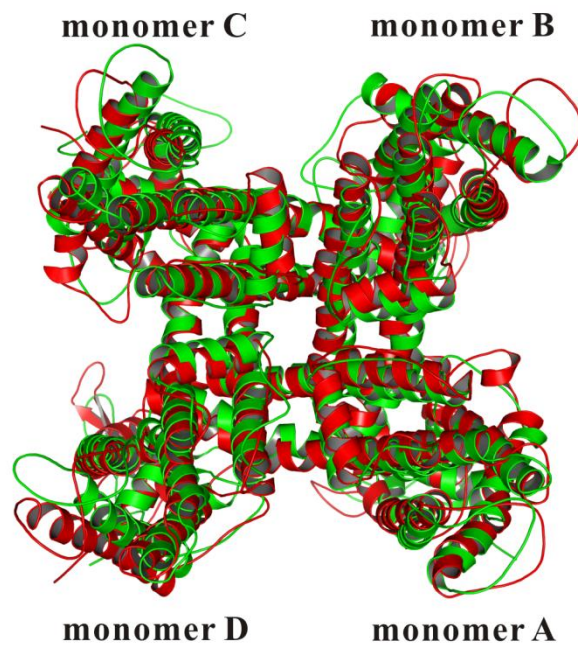

**Figure S9.** Alignments of hTRPV1 bound with AMG9810 and bound with RTX. hTRPV1 highlighted in green color was the structure of hTRPV1 bound with antagonist, while hTRPV1 highlighted in red color was the structure of hTRPV1 bound with agonist. We hid residues from 112 to 364 for clarity.

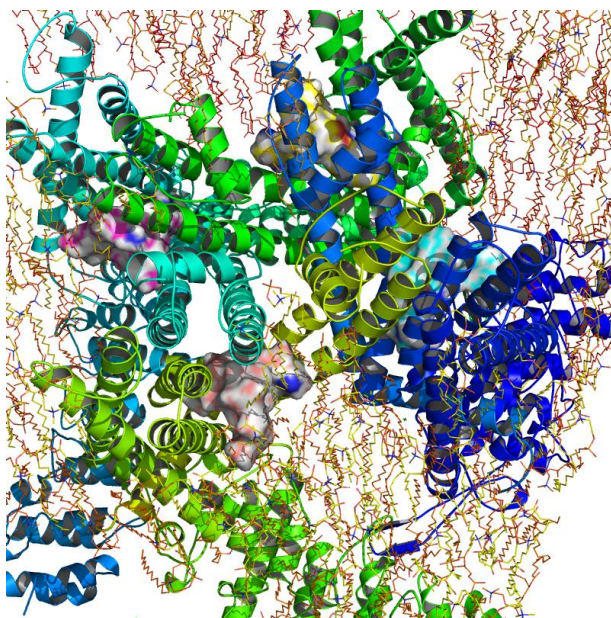

**Figure S10.** Four allosteric binding pockets in tetramer hTRPV1 model.



**Table S1.** List of structure and bioactivity information on 74 agonists for hTRPV1.

| SMILES Structure                                                      | Ki for TRPV1(nM) | ChEMBL_ID     |
|-----------------------------------------------------------------------|------------------|---------------|
| <chem>FC(F)(F)c1cc(NC(=O)N2CCc3c([nH]e4c3cc(O)cc4)C2)ccc1</chem>      | 0.005            | CHEMBL2312051 |
| <chem>Oc1cc2c3CCN(Cc3[nH]e2cc1)C(=O)Nc1ccc(cc1)C(C)(C)C</chem>        | 0.019            | CHEMBL2312050 |
| <chem>Oc1cc2c3CCN(Cc3[nH]e2cc1)C(=O)Nc1ccc(cc1)C(C)(C)C</chem>        | 0.019            | CHEMBL2312049 |
| <chem>O(C(=O)N1CCc2c([nH]e3c2cc(O)cc3)C1)c1ccc(cc1)-c1ccccc1</chem>   | 0.150            | CHEMBL2312048 |
| <chem>O(C(=O)N1CCc2c([nH]e3c2cc(O)cc3)C1)c1ccc(cc1)-c1ccccc1</chem>   | 0.650            | CHEMBL2312047 |
| <chem>O(C(=O)N1CCc2c([nH]e3c2cc(O)cc3)C1)c1ccc(cc1)-c1ccccc1</chem>   | 0.920            | CHEMBL2312046 |
| <chem>O(C(=O)N1CCc2c([nH]e3c2cc(O)cc3)C1)c1ccc(cc1)C(C)(C)C</chem>    | 0.980            | CHEMBL2312045 |
| <chem>O(C(=O)N1CCc2c([nH]e3c2cc(O)cc3)C1)c1ccc(cc1)CCCC</chem>        | 1.500            | CHEMBL2312044 |
| <chem>FC(F)(F)c1cc(OC(=O)N2CCc3c([nH]e4c3cc(O)cc4)C2)ccc1</chem>      | 1.900            | CHEMBL2312043 |
| <chem>O(C(=O)N1CCc2c([nH]e3c2cc(O)cc3)C1)c1ccc(cc1)C(C)(C)C</chem>    | 10.000           | CHEMBL2312062 |
| <chem>Oc1cc2c3CCN(Cc3[nH]e2cc1)C(=O)Cc1ccc(cc1)-c1ccccc1</chem>       | 100.000          | CHEMBL2312061 |
| <chem>Oc1cc2c3CCN(Cc3[nH]e2cc1)C(=O)c1ccc(cc1)-c1ccccc1</chem>        | 1000.000         | CHEMBL2312060 |
| <chem>Oc1cc2c3CCN(Cc3[nH]e2cc1)C(=O)c1ccc(cc1)C(C)(C)C</chem>         | 1000.000         | CHEMBL2312059 |
| <chem>O=C(C)c1ccc(cc1)-c1ccc(cc1)Cc1nn(nn1)C(=O)N(C)C</chem>          | 2.510            | CHEMBL2376845 |
| <chem>O=C(n1nnnc1Cc1ccc(cc1)-c1ccc(cc1)N(Cc1cc2c(cc1)cccc2)C</chem>   | 3.900            | CHEMBL2375374 |
| <chem>O=C(n1nc(nn1)Cc1ccc(cc1)-c1ccc(cc1)C)N(C)C</chem>               | 13.000           | CHEMBL2376855 |
| <chem>O=C(n1nc(nn1)Cc1ccc(cc1)-c1ccc(cc1)C)N(C)C</chem>               | 13.700           | CHEMBL2376854 |
| <chem>Oc1ccccc1-c1ccc(cc1)Cc1nn(nn1)C(=O)N(C)C</chem>                 | 15.200           | CHEMBL2376849 |
| <chem>OCc1ccc(cc1)-c1ccc(cc1)Cc1nn(nn1)C(=O)N(C)C</chem>              | 15.800           | CHEMBL2376848 |
| <chem>O=C(n1nnnc1Cc1ccc(cc1)-c1ccc(cc1)C)N(C)C</chem>                 | 16.300           | CHEMBL2376869 |
| <chem>O=C(n1nnnc1Cc1ccc(cc1)-c1ccc(cc1)C)N(C)C</chem>                 | 16.500           | CHEMBL2376868 |
| <chem>Oc1ccc(cc1)-c1ccc(cc1)Cc1nnnn1C(=O)N(C)C</chem>                 | 17.400           | CHEMBL2376865 |
| <chem>Oc1ccc(cc1)-c1ccc(cc1)Cc1nnnn1C(=O)N(C)C</chem>                 | 17.900           | CHEMBL2376864 |
| <chem>O=C(n1nc(nn1)Cc1ccc(cc1)-c1ccc(cc1)C)N(C)C</chem>               | 19.000           | CHEMBL2376855 |
| <chem>O=C(n1nc(nn1)Cc1ccc(cc1)-c1ccc(cc1)C)N(C)C</chem>               | 19.000           | CHEMBL2376854 |
| <chem>O=C(n1nc(nn1)Cc1ccc(cc1)-c1ccc(cc1)C)N(C)C</chem>               | 19.000           | CHEMBL2376853 |
| <chem>O=C(n1nc(nn1)Cc1ccc(cc1)-c1ccc(cc1)N(Cc1cc2c(cc1)cccc2)C</chem> | 20.000           | CHEMBL2376844 |
| <chem>O=C(n1nc(nn1)Cc1ccc(cc1)-c1ccc(cc1)N(C)C</chem>                 | 23.000           | CHEMBL485841  |
| <chem>O=C(N)c1ccc(cc1)-c1ccc(cc1)Cc1nnnn1C(=O)N(C)C</chem>            | 25.500           | CHEMBL2376866 |
| <chem>OCc1ccc(cc1)-c1ccc(cc1)Cc1nn(nn1)C(=O)N(C)C</chem>              | 150.000          | CHEMBL2376847 |
| <chem>O=C(N)c1ccc(cc1)-c1ccc(cc1)Cc1nnnn1C(=O)N(C)C</chem>            | 160.000          | CHEMBL2376866 |

|                                                                            |          |               |
|----------------------------------------------------------------------------|----------|---------------|
| <chem>OCc1ccc(cc1)-c1ccc(cc1)Cc1nnnn1C(=O)N(C)C</chem>                     | 170.000  | CHEMBL2376862 |
| <chem>O=C(C)c1ccc(cc1)-c1ccc(cc1)Cc1nnnn1C(=O)N(C)C</chem>                 | 180.000  | CHEMBL2376859 |
| <chem>O=C(n1nnnc1Cc1ccc(cc1)-c1ccc(cc1)N(CCCCc1ccc(cc1)C</chem>            | 183.000  | CHEMBL2376858 |
| <chem>O=C(n1nc(nn1)Cc1ccc(cc1)-c1ccc(cc1)N(CCCCc1ccc(cc1)C</chem>          | 200.000  | CHEMBL2376843 |
| <chem>O=C(n1nnnc1Cc1ccc(cc1)-c1ccc(cc1)C)N(C)C</chem>                      | 230.000  | CHEMBL2376869 |
| <chem>Oc1ccc(cc1)-c1ccc(cc1)Cc1nnnn1C(=O)N(C)C</chem>                      | 250.000  | CHEMBL2376865 |
| <chem>Oc1cc(ccc1)-c1ccc(cc1)Cc1nnnn1C(=O)N(C)C</chem>                      | 250.000  | CHEMBL2376864 |
| <chem>OCc1cc(ccc1)-c1ccc(cc1)Cc1nnnn1C(=O)N(C)C</chem>                     | 260.000  | CHEMBL2376861 |
| <chem>O(C(=O)c1ccc(cc1)-c1ccc(cc1)Cc1nnnn1C(=O)N(C)C)C</chem>              | 263.000  | CHEMBL2376860 |
| <chem>O=C(n1nnnc1Cc1ccc(cc1)-c1ccc(cc1)N(C)C1CCCCC1</chem>                 | 320.000  | CHEMBL2376857 |
| <chem>O=C(n1nc(nn1)Cc1ccc(cc1)-c1ccc(cc1)C)N(C)C</chem>                    | 1300.000 | CHEMBL2376853 |
| <chem>O=C(n1nc(nn1)Cc1ccc(cc1)-c1ccc(cc1)N1CCCCC1</chem>                   | 1500.000 | CHEMBL2376841 |
| <chem>O(C(=O)c1ccc(cc1)-c1ccc(cc1)Cc1nnnn1C(=O)N(C)C)C</chem>              | 1700.000 | CHEMBL2376860 |
| <chem>O=C(n1nnnc1Cc1ccc(cc1)-c1ccc(cc1)N(Cc1cc2c(cc1)ccc2)C</chem>         | 1800.000 | CHEMBL2375374 |
| <chem>O=C(n1nnnc1Cc1ccc(cc1)-c1ccc(cc1)N1CCCCC1</chem>                     | 1890.000 | CHEMBL2376856 |
| <chem>O=C(N)c1ccc(cc1)-c1ccc(cc1)Cc1nn(nn1)C(=O)N(C)C</chem>               | 1900.000 | CHEMBL2376852 |
| <chem>O=C(n1nc(nn1)Cc1ccc(cc1)-c1ccc(cc1)N1CCCCC1</chem>                   | 2270.000 | CHEMBL2376841 |
| <chem>O=C(n1nnnc1Cc1ccc(cc1)-c1ccc(cc1)C)N(C)C</chem>                      | 2400.000 | CHEMBL2376868 |
| <chem>O=C(n1nnnc1Cc1ccc(cc1)-c1ccc(cc1)N(C)C</chem>                        | 2400.000 | CHEMBL2376867 |
| <chem>Oc1ccc(cc1)-c1ccc(cc1)Cc1nnnn1C(=O)N(C)C</chem>                      | 2500.000 | CHEMBL2376863 |
| <chem>OCc1ccc(cc1)-c1ccc(cc1)Cc1nnnn1C(=O)N(C)C</chem>                     | 2511.890 | CHEMBL2376862 |
| <chem>O=C(n1nnnc1Cc1ccc(cc1)-c1ccc(cc1)N(C)C</chem>                        | 3300.000 | CHEMBL509860  |
| <chem>O(C(=O)N[C@@H]1C[C@@H](CC[C@H]1C(C)C)C)c1ccc(cc1)C(C)C</chem>        | 4.600    | CHEMBL1098094 |
| <chem>O(C(=O)N[C@@H]1C[C@@H](CC[C@H]1C(C)C)C)c1ccc(cc1)C(C)C</chem>        | 4.700    | CHEMBL1098095 |
| <chem>O(C(=O)N[C@@H]1C[C@@H](CC[C@H]1C(C)C)C)c1ccc(OC)cc1</chem>           | 6.280    | CHEMBL1096336 |
| <chem>O(C(=O)N[C@@H]1C[C@@H](CC[C@H]1C(C)C)C)c1ccc(cc1)-c1ccc(cc1)C</chem> | 40.000   | CHEMBL1098096 |
| <chem>Clc1cc(OC(=O)N[C@@H]2C[C@@H](CC[C@H]2C(C)C)C)ccc1</chem>             | 40.000   | CHEMBL1095974 |
| <chem>Clc1ccc(OC(=O)N[C@@H]2C[C@@H](CC[C@H]2C(C)C)C)ccc1</chem>            | 40.000   | CHEMBL1094393 |
| <chem>O(C(=O)N[C@@H]1C[C@@H](CC[C@H]1C(C)C)C)c1ccc(OC)cc1</chem>           | 40.000   | CHEMBL1096336 |
| <chem>O(C(=O)N[C@@H]1C[C@@H](CC[C@H]1C(C)C)C)c1ccc(cc1)-c1ccc(cc1)C</chem> | 540.000  | CHEMBL1094392 |
| <chem>O(C(=O)N[C@@H]1C[C@@H](CC[C@H]1C(C)C)C)c1ccc(cc1)C</chem>            | 5100.000 | CHEMBL1098431 |
| <chem>FC(F)F)c1ccc(OC(=O)N[C@@H]2C[C@@H](CC[C@H]2C(C)C)C)ccc1</chem>       | 5200.000 | CHEMBL1098432 |
| <chem>O(C(=O)N[C@@H]1C[C@@H](CC[C@H]1C(C)C)C)c1ccc(cc1)C(C)C</chem>        | 5290.000 | CHEMBL1098094 |
| <chem>Clc1cc(OC(=O)N[C@@H]2C[C@@H](CC[C@H]2C(C)C)C)ccc1</chem>             | 5800.000 | CHEMBL1095974 |

|                                                                    |          |               |
|--------------------------------------------------------------------|----------|---------------|
| <chem>C1c1ccc(OC(=O)N[C@@H]2C[C@@H](CC[C@H]2C(C)C)C)cc1</chem>     | 5900.000 | CHEMBL1094393 |
| <chem>O(C)c1ccc(cc1)C(=O)N[C@@H]1C[C@@H](CC[C@H]1C(C)C)C</chem>    | 51.500   | CHEMBL1098430 |
| <chem>O=C(N[C@@H]1C[C@@H](CC[C@H]1C(C)C)C)c1ccc(cc1)-c1ccc1</chem> | 470.000  | CHEMBL1094770 |
| <chem>C1c1ccc(cc1)C(=O)N[C@@H]1C[C@@H](CC[C@H]1C(C)C)C</chem>      | 500.000  | CHEMBL1095651 |
| <chem>O=C(N[C@@H]1C[C@@H](CC[C@H]1C(C)C)C)c1ccc(cc1)C(C)C</chem>   | 3650.000 | CHEMBL1094768 |
| <chem>C1c1cc(ccc1)C(=O)N[C@@H]1C[C@@H](CC[C@H]1C(C)C)C</chem>      | 3700.000 | CHEMBL1095651 |
| <chem>O=C(N[C@@H]1C[C@@H](CC[C@H]1C(C)C)C)c1ccc(cc1)C(C)C</chem>   | 4400.000 | CHEMBL1094768 |
| <chem>C1c1ccc(cc1)C(=O)N[C@@H]1C[C@@H](CC[C@H]1C(C)C)C</chem>      | 5000.000 | CHEMBL1098429 |
| <chem>O=C(N[C@@H]1C[C@@H](CC[C@H]1C(C)C)C)c1ccc(cc1)C</chem>       | 6309.570 | CHEMBL1098074 |

**Table S2.** List of structure and bioactivity information on 734 antagonists for hTRPV1.

| SMILES Structure                                                                           | Ki for TRPV1 (nM) | ChEMBL_ID     |
|--------------------------------------------------------------------------------------------|-------------------|---------------|
| <chem>S(=O)(=O)(Nc1ccc(cc1)F)C(C(=O)NCc1ccc(nc1)OCc1cccc1)C(F)(F)C</chem>                  | 0.001             | CHEMBL2385223 |
| <chem>S(=O)(=O)(Nc1ccc(cc1)F)[C@@H](C(=O)NCc1ccc(nc1)N1CCC(CC1)C)C(F)(F)C</chem>           | 0.010             | CHEMBL2177429 |
| <chem>S(c1nc(ccc1)CNC(=O)[C@@H](C)c1ccc(F)c(NS(=O)(=O)C)cc1)C(F)(F)C1CCCC1</chem>          | 0.050             | CHEMBL2442912 |
| <chem>FC(F)(F)c1cccnc1-c1nc2nccc(Nc3ccc(cc3)C(F)(F)F)e2nc1</chem>                          | 0.200             | CHEMBL1214342 |
| <chem>S(=O)(=O)(Nc1ccc(cc1)F)C(C(=O)NCc1ccc(nc1)N1CCC(CC1)Cc1ccc(F)c(F)cc1)C(F)(F)C</chem> | 0.200             | CHEMBL2178059 |
| <chem>S(=O)(=O)(Nc1ccc(cc1)F)C(C(=O)NCc1ccc(nc1)N1CCC(CC1)Cc1ccc(cc1)C)C(F)(F)C</chem>     | 0.200             | CHEMBL2177441 |
| <chem>S(=O)(=O)(Nc1ccc(cc1)F)C(C(=O)NCc1ccc(nc1)N1CCC(CC1)Cc1ccc1)C(F)(F)C</chem>          | 0.200             | CHEMBL2177440 |
| <chem>S(=O)(=O)(Nc1ccc(cc1)F)[C@@H](C(=O)NCc1ccc(nc1)N1CCC(CC1)C)C(F)(F)C</chem>           | 0.200             | CHEMBL2177429 |
| <chem>S(=O)(=O)(Nc1ccc(cc1)F)C(C(=O)NCc1ccc(nc1)N(CCC)CCC)C(F)(F)C</chem>                  | 0.200             | CHEMBL2178063 |
| <chem>FC(F)(F)c1cccnc1-c1nc2nenc(Nc3ccc(cc3)C(F)(F)F)e2nc1</chem>                          | 0.210             | CHEMBL1092853 |
| <chem>FC(F)(F)c1cccnc1-c1nc2nccc(Nc3ccc(cc3)C(F)(F)F)e2nc1</chem>                          | 0.230             | CHEMBL1089452 |
| <chem>S(=O)(=O)(Nc1ccc(cc1)F)C(C(=O)NCc1ccc(nc1)N1CCC(CC1)C)C(F)(F)C</chem>                | 0.230             | CHEMBL2177428 |
| <chem>S(=O)(=O)(Nc1ccc(cc1)F)C(C(=O)NCc1ccc(nc1)OCC(C)C)C(F)(F)C</chem>                    | 0.290             | CHEMBL2385408 |
| <chem>S(=O)(=O)(Nc1ccc(cc1)F)[C@@H](C(=O)NCc1ccc(nc1)N1CCC(CC1)c1ccc1)C(F)(F)C</chem>      | 0.300             | CHEMBL2177435 |
| <chem>S(=O)(=O)(Nc1ccc(cc1)F)C(C(=O)NCc1ccc(nc1)N1CCC(CC1)(C)C)C(F)(F)C</chem>             | 0.300             | CHEMBL2177432 |
| <chem>S(=O)(=O)(Nc1ccc(cc1)F)C(C(=O)NCc1ccc(nc1)N1CCC(CC1)C)C(F)(F)C</chem>                | 0.300             | CHEMBL2177428 |
| <chem>S(=O)(=O)(Nc1ccc(cc1)F)C(C(=O)NCc1ccc(nc1)N1CCC=CC1)C(F)(F)C</chem>                  | 0.300             | CHEMBL2177425 |
| <chem>S(=O)(=O)(Nc1ccc(cc1)F)[C@@H](C(=O)NCc1ccc(nc1)N1CCCC1)C(F)(F)C</chem>               | 0.300             | CHEMBL2177424 |
| <chem>S(=O)(=O)(Nc1ccc(cc1)F)[C@@H](C(=O)NCc1ccc(nc1)N1CCCC1)C(F)(F)C</chem>               | 0.300             | CHEMBL2178068 |
| <chem>S(=O)(=O)(Nc1ccc(cc1)F)C(C(=O)NCc1ccc(nc1)OCCC1N(CCCC1)C(OC(C)C)C)C(F)(F)C</chem>    | 0.300             | CHEMBL2385220 |
| <chem>S(=O)(=O)(Nc1ccc(cc1)F)C(C(=O)NCc1ccc(nc1)OCC1CCC1)C(F)(F)C</chem>                   | 0.300             | CHEMBL2385248 |

|                                                                                |       |               |
|--------------------------------------------------------------------------------|-------|---------------|
| S(=O)(=O)(Nc1ccc(cc1F)C(C(=O)NCc1ccc(nc1OC[C@H]1C[C@H]1C)C(F)(F)F)C)C          | 0.300 | CHEMBL2385246 |
| S(=O)(=O)(Nc1ccc(cc1F)C(C(=O)NCc1ccc(nc1OC1CCCC(C)C)C(F)(F)F)C(F)(F)F)C)C      | 0.300 | CHEMBL2385418 |
| S(=O)(=O)(Nc1ccc(cc1F)C(C(=O)NCc1ccc(nc1OCCCC)C(F)(F)F)C)C                     | 0.300 | CHEMBL2385423 |
| FC(F)(F)c1cccnc1-c1cc2nc(nc(Nc3ccc(cc3)C(F)(F)F)c2cc1)COC(C)C                  | 0.300 | CHEMBL457188  |
| S(=O)(=O)(Nc1ccc(cc1F)C(C(=O)NCc1ccc(nc1N1CCC(CC1)Cc1cc(F)cc(F)c1)C(F)(F)F)C)C | 0.400 | CHEMBL2177402 |
| S(=O)(=O)(Nc1ccc(cc1F)C(C(=O)NCc1ccc(nc1OCC1CCCC1)C(F)(F)F)C)C                 | 0.400 | CHEMBL2385249 |
| S(=O)(=O)(Nc1ccc(cc1F)[C@H](C(=O)NCc1ccc(nc1OCCCCC)C(F)(F)F)C)C                | 0.400 | CHEMBL2385426 |
| S(c1nc(ccc1CNC(=O)[C@H](C)c1cc(F)c(NS(=O)(=O)C)cc1)C(F)(F)F)C1CCCCC1           | 0.400 | CHEMBL2442912 |
| FC(F)(F)c1cccnc1-c1cc2nc(nc(Nc3ccc(cc3)C(F)(F)F)c2cc1)CN1CC(OC(C1)C)C          | 0.400 | CHEMBL456162  |
| S(=O)(=O)(Nc1ccc(cc1F)C(C(=O)NCc1ccc(nc1N1CCCC1)C(F)(F)F)C)C                   | 0.430 | CHEMBL2177423 |
| S(=O)(=O)(Nc1ccc(cc1F)C(C(=O)NCc1ccc(nc1N1CCC(F)CC1)C(F)(F)F)C)C               | 0.500 | CHEMBL2177404 |
| S(=O)(=O)(Nc1ccc(cc1F)C(C(=O)NCc1ccc(nc1OCCc1ccccc1)C(F)(F)F)C)C               | 0.500 | CHEMBL2385224 |
| S(=O)(=O)(Nc1ccc(cc1F)C(C(=O)NCc1ccc(nc1OCc1ccccc1)C(F)(F)F)C)C                | 0.500 | CHEMBL2385223 |
| S(=O)(=O)(Nc1ccc(cc1F)C(C(=O)NCc1ccc(nc1OC(CCCC)CCC)C(F)(F)F)C)C               | 0.500 | CHEMBL2385413 |
| S(=O)(=O)(Nc1ccc(cc1F)C(C(=O)NCc1ccc(nc1OCC(C)C)C(F)(F)F)C)C                   | 0.500 | CHEMBL2385408 |
| S(=O)(=O)(Nc1ccc(cc1F)C(C(=O)NCc1ccc(nc1OCCCCC)C(F)(F)F)C)C                    | 0.500 | CHEMBL2385425 |
| S(c1nc(ccc1CNC(=O)C(C)C)c1cc(F)c(NS(=O)(=O)C)cc1)C(F)(F)F)C1CCC(CC1)C          | 0.500 | CHEMBL2442916 |
| FC(F)(F)c1cccnc1-c1cc2nc(nc(Nc3ccc(cc3)C(F)(F)F)c2cc1)COCc1ccccc1              | 0.500 | CHEMBL456778  |
| FC(F)(F)c1cccnc1-c1cc2nc(nc(Nc3ccc(cc3)C(F)(F)F)c2cc1)C                        | 0.500 | CHEMBL526827  |
| Clc1cccnc1N1CCN(CC1)C(=O)Nc1ccc(cc1)C(C)C)C                                    | 0.600 | CHEMBL441472  |
| S(=O)(=O)(Nc1ccc(cc1F)C(C(=O)NCc1ccc(nc1N1CCC(CC1)C(F)(F)F)C(F)(F)F)C)C        | 0.600 | CHEMBL2177405 |
| S(=O)(=O)(Nc1ccc(cc1F)C(C(=O)NCc1ccc(nc1N1CCC(CC1)c1ccccc1)C(F)(F)F)C)C        | 0.600 | CHEMBL2177434 |
| S(=O)(=O)(Nc1ccc(cc1F)C(C(=O)NCc1ccc(nc1N1CCCC1)C(F)(F)F)C)C                   | 0.600 | CHEMBL2178067 |
| S(=O)(=O)(Nc1ccc(cc1F)C(C(=O)NCc1ccc(nc1N(CCCC)CCCC)C(F)(F)F)C)C               | 0.600 | CHEMBL2178064 |
| FC(F)(F)c1cccnc1-c1cc2nc(nc(Nc3ccc(cc3)C(F)(F)F)c2cc1)C                        | 0.630 | CHEMBL1089824 |
| Clc1cccnc1N1CCN(CC1)C(=O)Nc1ccc(cc1)C(C)C)C                                    | 0.700 | CHEMBL441472  |
| S(=O)(=O)(Nc1ccc(cc1F)C(C(=O)NCc1ccc(nc1N1CCN(CC1)c1ccccc1)C(F)(F)F)C)C        | 0.700 | CHEMBL2179146 |
| S(=O)(=O)(Nc1ccc(cc1F)C(C(=O)NCc1ccc(nc1N1CCCCC1)C(F)(F)F)C)C                  | 0.700 | CHEMBL2177419 |
| S(=O)(=O)(Nc1ccc(cc1F)C(C(=O)NCc1ccc(nc1N1CC(C)C(C)C)C(F)(F)F)C)C              | 0.700 | CHEMBL2177433 |
| S(=O)(=O)(Nc1ccc(cc1F)C(C(=O)NCc1ccc(nc1OCc1cc(OC)cc(OC)c1)C(F)(F)F)C)C        | 0.700 | CHEMBL2385238 |
| S(=O)(=O)(Nc1ccc(cc1F)C(C(=O)NCc1ccc(nc1OCC1CCCCC1)C(F)(F)F)C)C                | 0.700 | CHEMBL2385250 |
| S(=O)(=O)(Nc1ccc(cc1F)C(C(=O)NCc1ccc(nc1OC(C)C)CC(C)C)C(F)(F)F)C)C             | 0.700 | CHEMBL2385414 |
| S(=O)(=O)(Nc1ccc(cc1F)C(C(=O)NCc1ccc(nc1OC(CCC)CCC)C(F)(F)F)C)C                | 0.700 | CHEMBL2385412 |
| S(=O)(=O)(Nc1ccc(cc1F)C(C(=O)NCc1ccc(nc1OCCCC)C(F)(F)F)C)C                     | 0.700 | CHEMBL2385424 |

|                                                                              |       |               |
|------------------------------------------------------------------------------|-------|---------------|
| S(CCC(C)C)c1nc(ccc1CNC(=O)C(C)c1cc(F)c(NS(=O)(=O)C)cc1)C(F)(F)F              | 0.700 | CHEMBL2442897 |
| S(CCCC)c1nc(ccc1CNC(=O)C(C)c1cc(F)c(NS(=O)(=O)C)cc1)C(F)(F)F                 | 0.700 | CHEMBL2442894 |
| FC(F)(F)c1cc(ene1-c1nc2nccc(Nc3ncc(cc3)C(F)(F)F)c2nc1)C(=O)N                 | 0.800 | CHEMBL1214402 |
| S(=O)(=O)(Nc1ccc(cc1F)[C@@H](C(=O)NCc1ccc(nc1N1CCC(CC1)C)C(F)(F)F)C)C        | 0.800 | CHEMBL2177429 |
| S(=O)(=O)(Nc1ccc(cc1F)C(C(=O)NCc1ccc(nc1N1CCCCC1)C(F)(F)F)C)C                | 0.800 | CHEMBL2177418 |
| S(=O)(=O)(Nc1ccc(cc1F)C(C(=O)NCc1ccc(nc1N1CC(CCC1)C)C(F)(F)F)C)C             | 0.800 | CHEMBL2177427 |
| S(=O)(=O)(Nc1ccc(cc1F)C(C(=O)NCc1ccc(nc1N(CCCC)C)C(F)(F)F)C)C                | 0.800 | CHEMBL2178065 |
| S(=O)(=O)(Nc1ccc(cc1F)C(C(=O)NCc1ccc(nc1OCc1cc(OC)ccc1)C(F)(F)F)C)C          | 0.800 | CHEMBL2385235 |
| S(=O)(=O)(Nc1ccc(cc1F)C(C(=O)NCc1ccc(nc1OCc1cc(F)ccc1)C(F)(F)F)C)C           | 0.800 | CHEMBL2385233 |
| S(=O)(=O)(Nc1ccc(cc1F)C(C(=O)NCc1ccc(nc1OCCC(C)C)C(F)(F)F)C)C                | 0.800 | CHEMBL2385409 |
| FC(F)(F)c1ccene1-c1cc2nenc(Nc3ccc(cc3)C(F)(F)F)c2cc1                         | 0.800 | CHEMBL214796  |
| FC(F)(F)c1ccene1-c1nc2nenc(Nc3ccc(cc3)C(F)(F)F)c2cc1                         | 0.830 | CHEMBL1092852 |
| FC(F)(F)c1ccene1-c1cc2nenc(Nc3ncc(cc3)C(F)(F)F)c2cc1                         | 0.850 | CHEMBL456571  |
| S(=O)(=O)(Nc1ccc(cc1F)C(C(=O)NCc1ccc(nc1N(C)c1ccccc1)C(F)(F)F)C)C            | 0.900 | CHEMBL2178066 |
| S(=O)(=O)(Nc1ccc(cc1F)C(C(=O)NCc1ccc(nc1OC1CCC(CC1)C)C)C(F)(F)F)C)C          | 0.900 | CHEMBL2385241 |
| S(=O)(=O)(Nc1ccc(cc1F)C(C(=O)NCc1ccc(nc1OC1CCCC1)C(F)(F)F)C)C                | 0.900 | CHEMBL2385416 |
| S(=O)(=O)(Nc1ccc(cc1F)C(C(=O)NCc1ccc(nc1OCCC(C)C)C)C(F)(F)F)C)C              | 0.900 | CHEMBL2385410 |
| S(=O)(=O)(Nc1ccc(cc1F)C(C(=O)NCc1ccc(nc1OCCC)C(F)(F)F)C)C                    | 0.900 | CHEMBL2385422 |
| S(c1nc(ccc1CNC(=O)C(C)c1cc(F)c(NS(=O)(=O)C)cc1)C(F)(F)F)C1CCCCC1             | 0.900 | CHEMBL2442911 |
| FC(F)(F)c1ccene1-c1cc2nenc(Nc3ccc(cc3)C(F)(F)F)c2cc1)COCC                    | 0.900 | CHEMBL498666  |
| S(=O)(=O)(Nc1ccc(cc1F)C(C(=O)NCc1ccc(nc1OCc1cc(F)cc(F)c1)C(F)(F)F)C)C        | 1.000 | CHEMBL2385236 |
| S(=O)(=O)(Nc1ccc(cc1F)C(C(=O)NCc1ccc(nc1OCC1CCC(CC1)C)C)C(F)(F)F)C)C         | 1.000 | CHEMBL2385251 |
| S(=O)(=O)(Nc1ccc(cc1F)C(C(=O)NCc1ccc(nc1OC(C=C)C)C)C(F)(F)F)C)C              | 1.000 | CHEMBL2385255 |
| S(c1nc(ccc1CNC(=O)C(C)c1cc(F)c(NS(=O)(=O)C)cc1)C(F)(F)F)C1CCC(CC1)CC         | 1.000 | CHEMBL2442918 |
| FC(F)(F)c1ccene1-c1cc2nenc(Nc3ccc(cc3)C(F)(F)F)c2cc1)COC(C)C                 | 1.000 | CHEMBL513942  |
| FC(F)(F)c1ccene1-c1cc2nenc(Nc3ncc(cc3)C(F)(F)F)c2cc1)CN1C[C@H](O[C@H](C1)C)C | 1.000 | CHEMBL457003  |
| FC(F)(F)c1ccene1-c1cc2nenc(Nc3ccc(cc3)C(F)(F)F)c2cc1                         | 1.100 | CHEMBL214796  |
| S(=O)(=O)(Nc1ccc(cc1F)C(C(=O)NCc1ccc(nc1N1CCN(CC1)c1ccc(F)cc1)C(F)(F)F)C)C   | 1.100 | CHEMBL2179150 |
| S(=O)(=O)(Nc1ccc(cc1F)C(C(=O)NCc1ccc(nc1OCC1CC1(C)C)C)C(F)(F)F)C)C           | 1.100 | CHEMBL2385247 |
| S(=O)(=O)(Nc1ccc(cc1F)C(C(=O)NCc1ccc(nc1OCC1CC1)C)C(F)(F)F)C)C               | 1.100 | CHEMBL2385082 |
| S(=O)(=O)(Nc1ccc(cc1F)C(C(=O)NCc1ccc(nc1OC(CC)C)C)C(F)(F)F)C)C               | 1.100 | CHEMBL2385411 |
| FC(F)(F)c1nc(N2CCOCC2)c(cc1)C=C(C(=O)Nc1cc2cccc2cc1                          | 1.200 | CHEMBL191247  |
| S(c1nc(ccc1CNC(=O)C(C)c1cc(F)c(NS(=O)(=O)C)cc1)C(F)(F)F)C1CCCCC1             | 1.200 | CHEMBL2442910 |
| FC(F)(F)c1ccene1-c1cc2nenc(Nc3ccc(cc3)C(F)(F)F)c2cc1)CN(CC)CC                | 1.200 | CHEMBL457842  |



|                                                                                   |       |               |
|-----------------------------------------------------------------------------------|-------|---------------|
| S(=O)(=O)(Nc1ccc(cc1F)C(C(=O)NCc1ccc(nc1N1CCOCC1)C(F)(F)F)C)C                     | 1.300 | CHEMBL2177400 |
| S(=O)(=O)(Nc1ccc(cc1F)C(C(=O)NCc1ccc(nc1N1CCC(OCC)CC1)C(F)(F)F)C)C                | 1.300 | CHEMBL2177409 |
| S(=O)(=O)(Nc1ccc(cc1F)C(C(=O)NCc1ccc(nc1OC1CCN(CC1)C(OC(C)C)C)=O)C(F)(F)F)C)C     | 1.300 | CHEMBL2385244 |
| S(=O)(=O)(Nc1ccc(cc1F)C(C(=O)NCc1ccc(nc1OC1CCCC1)C(F)(F)F)C)C                     | 1.300 | CHEMBL2385417 |
| S(=O)(=O)(Nc1ccc(cc1F)C(C(=O)NCc1ccc(nc1N1CCN(CC1)e1ncccc1)C(F)(F)F)C)C           | 1.400 | CHEMBL2179153 |
| S(=O)(=O)(Nc1ccc(cc1F)C(C(=O)NCc1ccc(nc1N1CCC(CC1)COC)C(F)(F)F)C)C                | 1.400 | CHEMBL2177410 |
| S(=O)(=O)(Nc1ccc(cc1F)C(C(=O)NCc1ccc(nc1N1C[C@H](OCe2cccc2)CC1)C(F)(F)F)C)C       | 1.400 | CHEMBL2178072 |
| S(=O)(=O)(Nc1ccc(cc1F)C(C(=O)NCc1ccc(nc1OC1CCC1)C(F)(F)F)C)C                      | 1.400 | CHEMBL2385415 |
| S(=O)(=O)(Nc1ccc(cc1F)C(C(=O)NCc1ccc(nc1N1C[C@H](O[C@H](C1)C)C)C(F)(F)F)C)C       | 1.430 | CHEMBL2177401 |
| S(=O)(=O)(Nc1ccc(cc1F)C(C(=O)NCc1ccc(nc1N1CCC(CC1)CC)C(F)(F)F)C)C                 | 1.500 | CHEMBL2177431 |
| S(=O)(=O)(Nc1ccc(cc1F)C(C(=O)NCc1ccc(nc1OCc1ccc(cc1)C)C(F)(F)F)C)C                | 1.500 | CHEMBL2385225 |
| S(=O)(=O)(Nc1ccc(cc1F)C(C(=O)NCc1ccc(nc1OCCCOe1cccc1)C(F)(F)F)C)C                 | 1.500 | CHEMBL2385406 |
| FC(F)(F)c1cccnc1-c1cc2nc(nc(Nc3ccc(cc3)C(F)(F)F)c2cc1)COC                         | 1.500 | CHEMBL497650  |
| S(=O)(=O)(Nc1ccc(cc1F)C(C(=O)NCc1ccc(nc1OC(C=C)C)C(F)(F)F)C)C                     | 1.600 | CHEMBL2385254 |
| FC(F)(F)c1cccnc1-c1cc2nccc(Nc3ncc(cc3)C(F)(F)F)c2cc1                              | 1.650 | CHEMBL1093132 |
| S(=O)(=O)(Nc1ccc(cc1F)C(C(=O)NCc1ccc(nc1N1CCC(=CC1)e1cccc1)C(F)(F)F)C)C           | 1.700 | CHEMBL2177437 |
| S(Cc1cccnc1)c1nc(ccc1CNC(=O)C(C)c1cc(F)c(NS(=O)(=O)C)cc1)C(F)(F)F                 | 1.900 | CHEMBL2442928 |
| S(C1CCCCC1C)c1nc(ccc1CNC(=O)C(C)c1cc(F)c(NS(=O)(=O)C)cc1)C(F)(F)F                 | 1.900 | CHEMBL2442917 |
| S(=O)(=O)(Nc1ccc(cc1F)C(C(=O)NCc1ccc(nc1N1CCC(OC(=O)C(C)C)CC1)C(F)(F)F)C)C        | 2.000 | CHEMBL2177414 |
| FC(F)(F)c1cccnc1-c1cc2nc(nc(Nc3ccc(nc3)C(F)(F)F)c2cc1)CN1C[C@H](O[C@H](C1)C)C     | 2.000 | CHEMBL456128  |
| FC(F)(F)c1cccnc1-c1cc2nc(nc(Nc3ccc(cc3)C(F)(F)F)c2cc1)CCCN1C[C@H](O[C@H](C1)C)C   | 2.000 | CHEMBL446258  |
| FC(F)(F)c1cccnc1-c1cc2nc(nc(Nc3ccc(cc3)C(F)(F)F)c2cc1)CCOC                        | 2.000 | CHEMBL456152  |
| C1c1cccnc1N1CCN(CC1)c1nc(ccc1CNC(=O)C(C)c1cc(F)c(NS(=O)(=O)C)cc1)C(F)(F)F         | 2.100 | CHEMBL2179154 |
| S(=O)(=O)(Nc1ccc(cc1F)C(C(=O)NCc1ccc(nc1N1CCC(CC1)CN(C)C)C(F)(F)F)C)C             | 2.100 | CHEMBL2177415 |
| S(=O)(=O)(Nc1ccc(cc1F)C(C(=O)NCc1ccc(nc1OCe1ccc(cc1)C(C)C)C(F)(F)F)C)C            | 2.100 | CHEMBL2385228 |
| S(=O)(=O)(Nc1ccc(cc1F)C(C(=O)NCc1ccc(nc1OC(C)C)C(F)(F)F)C)C                       | 2.100 | CHEMBL2385407 |
| FC(F)(F)c1cccnc1-c1cc2nc(nc(Nc3ccc(cc3)C(F)(F)F)c2cc1)CN1CCOCC1                   | 2.100 | CHEMBL458058  |
| FC(F)(F)c1cccnc1-c1nc2nccc(Nc3ncc(cc3)C(F)(F)F)c2cc1                              | 2.200 | CHEMBL1089119 |
| S(=O)(=O)(Nc1ccc(cc1F)C(C(=O)NCc1ccc(nc1N1CCN(CC1)e1ccc(cc1)C(F)(F)F)C(F)(F)F)C)C | 2.300 | CHEMBL2179151 |
| S(Cc1ccc(OC)cc1)c1nc(ccc1CNC(=O)C(C)c1cc(F)c(NS(=O)(=O)C)cc1)C(F)(F)F             | 2.300 | CHEMBL2442923 |
| S(C1CCCCC1)c1nc(ccc1CNC(=O)C(C)c1cc(F)c(NS(=O)(=O)C)cc1)C(F)(F)F                  | 2.300 | CHEMBL2442920 |
| S(CCOc1cccnc1)c1nc(ccc1CNC(=O)C(C)c1cc(F)c(NS(=O)(=O)C)cc1)C(F)(F)F               | 2.300 | CHEMBL2442900 |
| S(=O)(=O)(Nc1ccc(cc1F)C(C(=O)NCc1ccc(nc1N1CCN(CC1)e1cccnc1)C(F)(F)F)C)C           | 2.400 | CHEMBL2179149 |
| S(=O)(=O)(Nc1ccc(cc1F)C(C(=O)NCc1ccc(nc1N1CCC(OC)CC1)C(F)(F)F)C)C                 | 2.400 | CHEMBL2177408 |

|                                                                                      |       |               |
|--------------------------------------------------------------------------------------|-------|---------------|
| S(=O)(=O)(Nc1ccc(cc1F)C(C(=O)NCc1ccc(nc1N1CCC(=CC1)c1ccc(F)cc1)C(F)(F)F)C)C          | 2.400 | CHEMBL2177439 |
| S(=O)(=O)(Nc1ccc(cc1F)C(C(=O)NCc1ccc(nc1N1CCN(CC1)c1ccc(OC)cc1)C(F)(F)F)C)C          | 2.500 | CHEMBL2179152 |
| Clc1ccc(cc1)COc1nc(ccc1CNC(=O)C(C)c1cc(F)c(NS(=O)(=O)C)cc1)C(F)(F)F                  | 2.500 | CHEMBL2385230 |
| S(=O)(=O)(Nc1ccc(cc1F)C(C(=O)NCc1ccc(nc1OCc1ccc(F)cc1)C(F)(F)F)C)C                   | 2.500 | CHEMBL2385229 |
| S(CCCC)c1nc(ccc1CNC(=O)C(C)c1cc(F)c(NS(=O)(=O)C)cc1)C(F)(F)F                         | 2.500 | CHEMBL2442895 |
| FC(F)(F)c1cccnc1-c1cc2ncnc(Nc3ccc(cc3)C(F)(F)F)c2cc1                                 | 2.500 | CHEMBL456571  |
| S(=O)(=O)(Nc1ccc(cc1F)C[C@@H](C(=O)NCc1ccc(nc1N1CCC[C@H]1C(OC(C)(C)C)=O)C(F)(F)F)C)C | 2.600 | CHEMBL2178071 |
| Clc1ccc(cc1)c1COc1nc(ccc1CNC(=O)C(C)c1cc(F)c(NS(=O)(=O)C)cc1)C(F)(F)F                | 2.600 | CHEMBL2385237 |
| S(=O)(=O)(Nc1ccc(cc1F)C(C(=O)NCc1ccc(nc1OCc1ccc(OC)cc1)C(F)(F)F)C)C                  | 2.600 | CHEMBL2385232 |
| S(c1nc(ccc1CNC(=O)C(C)c1cc(F)c(NS(=O)(=O)C)cc1)C(F)(F)F)C1CCC(CC1)C(C)(C)C           | 2.600 | CHEMBL2442919 |
| S(=O)(=O)(Nc1ccc(cc1F)C(C(=O)NCc1ccc(nc1OC1Cc2c(C1)cccc2)C(F)(F)F)C)C                | 2.700 | CHEMBL2385245 |
| S(=O)(=O)(Nc1ccc(cc1F)C(C(=O)NCc1ccc(nc1N1CCN(CC1)c1ccc1C(F)(F)F)C(F)(F)F)C)C        | 2.800 | CHEMBL2177398 |
| S(=O)(=O)(Nc1ccc(cc1F)C(C(=O)NCc1ccc(nc1Oe1ccc(cc1)C)C(F)(F)F)C)C                    | 2.800 | CHEMBL2385222 |
| S(=O)(=O)(Nc1ccc(cc1F)C(C(=O)NCc1ccc(nc1N1CCCC1C)C(F)(F)F)C)C                        | 2.900 | CHEMBL2177426 |
| S(=O)(=O)(Nc1ccc(cc1F)C(C(=O)NCc1ccc(nc1OC1CCC(CC1)C)C(F)(F)F)C)C                    | 2.900 | CHEMBL2385419 |
| S(CCCN1CCC(CC1)C)c1nc(ccc1CNC(=O)C(C)c1cc(F)c(NS(=O)(=O)C)cc1)C(F)(F)F               | 2.900 | CHEMBL2442905 |
| S(=O)(=O)(Nc1ccc(cc1F)C(C(=O)NCc1ccc(nc1N1CCC(OC(C)C)CC1)C(F)(F)F)C)C                | 3.000 | CHEMBL2177412 |
| S(=O)(=O)(Nc1ccc(cc1F)C(C(=O)NCc1ccc(nc1OC1CC(CC(C1)C)C)C(F)(F)F)C)C                 | 3.000 | CHEMBL2385242 |
| S(CCCN1CCCC1)c1nc(ccc1CNC(=O)C(C)c1cc(F)c(NS(=O)(=O)C)cc1)C(F)(F)F                   | 3.000 | CHEMBL2442904 |
| FC(F)(F)c1cccnc1-c1cc2ncnc(Nc3ccc(cc3)C(F)(F)F)c2cc1CCC1CCOCC1                       | 3.000 | CHEMBL456570  |
| S(=O)(=O)(Nc1ccc(cc1F)C(C(=O)NCc1ccc(nc1OCc1ccc(cc1)C)C(F)(F)F)C(F)(F)F)C)C          | 3.200 | CHEMBL2385231 |
| S(Cc1ccc(cc1)C)c1nc(ccc1CNC(=O)C(C)c1cc(F)c(NS(=O)(=O)C)cc1)C(F)(F)F                 | 3.200 | CHEMBL2442922 |
| S(=O)(=O)(Nc1ccc(cc1F)C(C(=O)NCc1ccc(nc1N1CCN(CC1)c1ccc(cc1)C)C(F)(F)F)C)C           | 3.300 | CHEMBL2179148 |
| S(CCCN1CCCC1)c1nc(ccc1CNC(=O)C(C)c1cc(F)c(NS(=O)(=O)C)cc1)C(F)(F)F                   | 3.300 | CHEMBL2442903 |
| S(=O)(=O)(Nc1ccc(cc1F)C(C(=O)NCc1ccc(nc1N1CCN(CC1)c1ccc(cc1)C)C(F)(F)F)C)C           | 3.400 | CHEMBL2179147 |
| S(=O)(=O)(Nc1ccc(cc1F)C(C(=O)NCc1ccc(nc1OCC1CCN(CC1)C(OC(C)(C)C)=O)C(F)(F)F)C)C      | 3.400 | CHEMBL2385219 |
| FC(F)(F)c1nc(N2CCCC2)c(cc1)CNC(=O)Nc1c2c([nH]nc2)ccc1                                | 3.500 | CHEMBL1083396 |
| S(=O)(=O)(Nc1ccc(cc1F)C(C(=O)NCc1ccc(nc1N1CCC(OCCCC)CC1)C(F)(F)F)C)C                 | 3.500 | CHEMBL2177411 |
| S(=O)(=O)(Nc1ccc(cc1F)C(C(=O)NCc1ccc(nc1N(CC)CC)C(F)(F)F)C)C                         | 3.500 | CHEMBL2178062 |
| S(=O)(=O)(Nc1ccc(cc1F)C(C(=O)NCc1ccc(nc1OCc1ccc(cc1)C)C(F)(F)F)C)C                   | 3.700 | CHEMBL2385226 |
| S(=O)(=O)(Nc1ccc(cc1F)C(C(=O)NCc1ccc(nc1N1CCC2(ON=C(C2)C(C)C)CC1)C(F)(F)F)C)C        | 3.800 | CHEMBL2177416 |
| S(=O)(=O)(Nc1ccc(cc1F)C(C(=O)NCc1ccc(nc1N1CCC(CC1)C(=O)c1ccc(F)cc1)C(F)(F)F)C)C      | 3.900 | CHEMBL2177403 |
| S(Cc1ccc(cc1)C(F)(F)F)c1nc(ccc1CNC(=O)C(C)c1cc(F)c(NS(=O)(=O)C)cc1)C(F)(F)F          | 3.900 | CHEMBL2442925 |
| S(=O)(=O)(Nc1ccc(cc1F)C(C(=O)NCc1ccc(nc1N1CCC(OC(=O)C)CC1)C(F)(F)F)C)C               | 4.000 | CHEMBL2177413 |

|                                                                                 |       |               |
|---------------------------------------------------------------------------------|-------|---------------|
| FC(F)(F)c1ccene1-c1ce2nc(nc3ccc(cc3)C(F)(F)F)c2cc1CO                            | 4.000 | CHEMBL497649  |
| Cle1ccene1N1CC(N(CC)1)c1nc(ccc1CNC(=O)C(C)c1cc(F)c(NS(=O)(=O)C)cc1)C(F)(F)F)C   | 4.100 | CHEMBL2177397 |
| S(=O)(=O)(Nc1ccc(cc1F)C(C(=O)NCc1ccc(nc1N1CCC(CC1)c1ccc(F)cc1)C(F)(F)F)C)C      | 4.200 | CHEMBL2177438 |
| S(CC(F)(F)F)c1nc(ccc1CNC(=O)C(C)c1cc(F)c(NS(=O)(=O)C)cc1)C(F)(F)F               | 4.300 | CHEMBL2442898 |
| FC(F)(F)c1ccene1-c1ne2nccc(Nc3ccc(cc3)C(F)(F)F)c2cc1                            | 4.400 | CHEMBL1214147 |
| S(=O)(=O)(Nc1ccc(cc1F)C(C(=O)NCc1ccc(nc1N1CCC(Nc2cccc2)CC1)C(F)(F)F)C)C         | 4.400 | CHEMBL2177108 |
| FC(F)(F)c1nc(N2CCCC2)c(cc1)C=C(C(=O)Nc1cc2ncccc2cc1                             | 4.400 | CHEMBL190874  |
| S(=O)(=O)(Nc1ccc(cc1F)C(C(=O)NCc1ccc(nc1N1CCC(CC1)C)C(F)(F)F)C)C                | 4.500 | CHEMBL2177428 |
| FC(F)(F)c1ccene1-c1ce2nc(nc3ccc(nc3)C(F)(F)F)c2cc1COCC                          | 4.500 | CHEMBL456961  |
| S(=O)(=O)(Nc1ccc(cc1F)C(C(=O)NCc1ccc(nc1OC1CCC(CC1)CC)C(F)(F)F)C)C              | 4.800 | CHEMBL2385239 |
| Cle1ccc(cc1)COc1nc(ccc1CNC(=O)C(C)c1cc(F)c(NS(=O)(=O)C)cc1)C(F)(F)F             | 4.900 | CHEMBL2385234 |
| Cle1ccc(cc1)CSc1nc(ccc1CNC(=O)C(C)c1cc(F)c(NS(=O)(=O)C)cc1)C(F)(F)F             | 4.900 | CHEMBL2442924 |
| Cle1ccene1N1CCN(CC1)C(=O)Nc1ccc(cc1)C(C)(C)C                                    | 5.000 | CHEMBL441472  |
| FC(F)(F)c1nc(CCC(C)(C)C)cc1)CNC(=O)Nc1c2c([nH]nc2)ccc1                          | 5.000 | CHEMBL1083712 |
| S(=O)(=O)(Nc1ccc(cc1F)C(C(=O)NCc1ccc(nc1N1Cc2c(C1)cccc2)C(F)(F)F)C)C            | 5.000 | CHEMBL2177422 |
| S(=O)(=O)(Nc1ccc(cc1F)C(C(=O)NCc1ccc(nc1OC[C@@H]1[C@H]1C)C(F)(F)F)C)C           | 5.100 | CHEMBL2385246 |
| FC(F)(F)c1ccene1-c1ne2nccc(Nc3ccc(nc3)C(F)(F)F)c2cc1                            | 5.500 | CHEMBL1214146 |
| S(CCCCC)c1nc(ccc1CNC(=O)C(C)c1cc(F)c(NS(=O)(=O)C)cc1)C(F)(F)F                   | 5.600 | CHEMBL2442896 |
| s1c2c(nc1N(C)C)cc(NC(=O)c1ccc(nc1C)-c1ccc(F)cc1)cc2                             | 5.800 | CHEMBL477202  |
| FC(F)(F)c1ccenc1N1CCc2c(nc2Nc2ccc(cc2)C(F)(F)F)N2CCOCC2)CC1                     | 6.000 | CHEMBL1289607 |
| FC(F)(F)c1ccene1N1CCC(=CC1)C(=O)Nc1ccc(cc1)C(C)(C)C                             | 6.000 | CHEMBL518979  |
| FC(F)(F)c1nc(OCC(C)(C)C)cc1)CNC(=O)Nc1c2c([nH]nc2)ccc1                          | 6.000 | CHEMBL1084293 |
| Fe1ccc(cc1)-c1nc(C)c(cc1)C(=O)Nc1cc2[nH]c(nc2cc1)C                              | 6.000 | CHEMBL477623  |
| FC(F)(F)c1ccene1-c1ce2nc(nc3ccc(cc3)C(F)(F)F)c2cc1)CNC1CCCCC1                   | 6.000 | CHEMBL456764  |
| FC(F)(F)c1ccene1-c1ne2nccc(Nc3ccc(cc3)C(F)(F)F)c2cc1                            | 6.100 | CHEMBL1089118 |
| S(=O)(=O)(Nc1ccc(cc1F)C(C(=O)NCc1ccc(nc1N1CCC2(ON=C(C2)c2cccc2)CC1)C(F)(F)F)C)C | 6.100 | CHEMBL2177417 |
| S(=O)(=O)(Nc1ccc(cc1F)[C@@H](C(=O)NCc1ccc(nc1N1CCC(CC1)C)C(F)(F)F)C)C           | 6.300 | CHEMBL2177429 |
| S(=O)(=O)(Nc1ccc(cc1F)C(C(=O)NCc1ccc(nc1Oc1cccc1)C(F)(F)F)C)C                   | 6.400 | CHEMBL2385221 |
| Fe1ccc(cc1)-c1nc(C)c(cc1)C(=O)Nc1cc2n(ccc2cc1)C                                 | 6.500 | CHEMBL477409  |
| O=C(Nc1cc2ncccc2cc1)c1ccc(nc1)-c1ccc(cc1)C#N                                    | 6.600 | CHEMBL517053  |
| Cle1ccenc1N1CCN(CC1)C(=O)Nc1ccc(cc1)C(C)(C)C                                    | 6.700 | CHEMBL441472  |
| s1c2c(nc1CN(C)C)cc(NC(=O)c1ccc(nc1C)-c1ccc(F)cc1)cc2                            | 6.700 | CHEMBL477000  |
| s1c2cc(NC(=O)c3ccc(nc3C)-c3ccc(F)cc3)ccc2nc1                                    | 6.700 | CHEMBL477831  |
| Fe1ccc(cc1)-c1nc(C)c(cc1)C(=O)Nc1cc2oc(nc2cc1)C                                 | 6.700 | CHEMBL499768  |

|                                                                                      |       |               |
|--------------------------------------------------------------------------------------|-------|---------------|
| Fe1ccc(cc1)-c1nc(C)c(cc1)C(=O)Nc1cc2n(ene2cc1)C                                      | 6.700 | CHEMBL477622  |
| O=C(Nc1cc2ncccc2cc1)c1nc(cc1C)-c1ccc1                                                | 6.700 | CHEMBL477205  |
| Clc1ccc(cc1)C(=O)Nc1cc2ncccc2cc1                                                     | 6.700 | CHEMBL477203  |
| O=C(Nc1cc2ncccc2cc1)c1ccc(nc1)C#N                                                    | 6.700 | CHEMBL477830  |
| Fe1ccc(cc1)-c1nc(C)c(cc1)C(=O)Nc1cc2[nH]nc(c2cc1)C                                   | 6.900 | CHEMBL478245  |
| BrCCCSc1nc(ccc1)CNC(=O)C(C)c1cc(F)c(NS(=O)(=O)C)cc1)C(F)(F)F                         | 7.000 | CHEMBL2442899 |
| FC(F)(F)c1cccnc1-c1cc2ncnc(Nc3ccc(nc3)C(F)(F)F)c2cc1                                 | 7.000 | CHEMBL463382  |
| FC(F)(F)c1cccnc1-c1cc2ncnc(Nc3ccc(nc3)C(F)(F)F)c2cc1                                 | 7.100 | CHEMBL1204401 |
| S(=O)(=O)(Nc1ccc(cc1F)[C@@H](C(=O)NCc1ccc(nc1N1C[C@@H](NC(OC(C)C)C)C)C)C)C(F)C)C(F)C | 7.100 | CHEMBL2177421 |
| s1c2c(nc1C)cc(NC(=O)c1ccc(nc1C)-c1ccc(F)cc1)cc2                                      | 7.200 | CHEMBL514691  |
| Fe1ccc(cc1)-c1nc(C)c(cc1)C(=O)Nc1cc2[nH]nc2cc1                                       | 7.200 | CHEMBL477621  |
| FC(F)(F)c1ccc(cc1)-c1ccc(cc1)C(=O)Nc1cc2ncccc2cc1                                    | 7.300 | CHEMBL477829  |
| s1c2c(nc1C)cc(NC(=O)c1ccc(nc1C)-c1ccc(F)cc1)cc2                                      | 7.400 | CHEMBL514691  |
| S(=O)(=O)(Nc1ccc(cc1F)[C@H](C(=O)NCc1ccc(nc1N1CCC(CC1)c1ccc1)C(F)(F)C)C              | 7.500 | CHEMBL2177436 |
| s1c2c(nc1)cc(NC(=O)c1ccc(nc1C)-c1ccc(F)cc1)cc2                                       | 7.500 | CHEMBL476999  |
| Fe1ccc(cc1)-c1nc(C)c(cc1)C(=O)Nc1cc2[nH]nc2cc1                                       | 7.500 | CHEMBL477588  |
| S(=O)(=O)(Nc1ccc(cc1F)C(C(=O)NCc1ccc(nc1OC1CCC(CC1)C(C)C)C)C)C(F)(F)C)C              | 7.700 | CHEMBL2385240 |
| Clc1ccc(cc1)-c1ccc(cc1)C(=O)Nc1cc2ncccc2cc1                                          | 7.800 | CHEMBL516420  |
| FC(F)(F)c1cccnc1N1CCC(=CC1)C(=O)Nc1ccc(cc1)C(F)(F)F                                  | 8.000 | CHEMBL522425  |
| S(=O)(=O)(Nc1ccc(cc1F)C(C(=O)NCc1ccc(nc1N1CCC(CC1)C)C)C)C(F)(F)C)C                   | 8.000 | CHEMBL2177432 |
| FC(F)(F)c1cccnc1-c1cc2nc(nc(Nc3ccc(cc3)C(F)(F)F)c2cc1)CN1CCN(CC1)C1CCCC1             | 8.000 | CHEMBL451895  |
| FC(F)(F)c1cccnc1-c1cc2nc(nc(Nc3ccc(cc3)C(F)(F)F)c2cc1)CNC(C)C                        | 8.000 | CHEMBL456546  |
| Fe1ccc(cc1)-c1ccc(cc1)C(=O)Nc1cc2ncccc2cc1                                           | 8.200 | CHEMBL478244  |
| FC(F)(F)c1cccnc1-c1cc2ncccc2cc1                                                      | 8.400 | CHEMBL1214266 |
| S(=O)(=O)(Nc1ccc(cc1F)C(C(=O)NCc1ccc(nc1N1CCC(CC1)C)C)C)C(F)(F)C)C                   | 8.400 | CHEMBL2177428 |
| Fe1ccc(cc1)-c1nc(C)c(cc1)C(=O)Nc1cc2ncccc2cc1                                        | 8.500 | CHEMBL477204  |
| Fe1ccc(cc1)-c1ccc(cc1)C(=O)Nc1cc2ncccc2cc1                                           | 8.600 | CHEMBL516424  |
| Clc1ccc(cc1)CSc1nc(ccc1)CNC(=O)C(C)c1cc(F)c(NS(=O)(=O)C)cc1)C(F)(F)F                 | 8.700 | CHEMBL2442921 |
| O=C(Nc1cc2ncccc2cc1)c1ccc(nc1)-c1ccc1                                                | 8.700 | CHEMBL213390  |
| Fe1cccc1-c1ccc(cc1)C(=O)Nc1cc2ncccc2cc1                                              | 8.700 | CHEMBL478243  |
| S(=O)(=O)(Nc1ccc(cc1F)C(C(=O)NCc1ccc(nc1N1CCN(CC1)Cc1ccc1)C(F)(F)C)C                 | 8.800 | CHEMBL2177399 |
| FC(F)(F)c1cccnc1N1CCc2c(ncnc2)C(C)C)C1                                               | 9.000 | CHEMBL1290369 |
| FC(F)(F)c1nc(Oc2cccc2)c(cc1)CNC(=O)Nc1c2c([nH]nc2)ccc1                               | 9.000 | CHEMBL1085786 |
| s1c2c(nc1C)cc(NC(=O)c1ccc(nc1C)-c1ccc(F)cc1)cc2                                      | 9.000 | CHEMBL514691  |

|                                                                                     |        |               |
|-------------------------------------------------------------------------------------|--------|---------------|
| O=C(Nc1cc2ncccc2cc1)c1ccc(nc1C)-c1cccc1                                             | 9.000  | CHEMBL516431  |
| FC(F)(F)c1cccn1-c1cc2nc(nc3nccc(cc3)C(F)(F)F)c2cc1)CN1CCOCC1                        | 9.000  | CHEMBL457002  |
| S(=O)(=O)(Nc1ccc(cc1F)C(C=O)NCc1ccc(nc1NCCCC)C(F)(F)F)C                             | 9.100  | CHEMBL2178076 |
| S(=O)(=O)(Nc1ccc(cc1F)C(C=O)NCc1ccc(nc1OCCCC)C(F)(F)F)C                             | 9.700  | CHEMBL2385405 |
| S(=O)(=O)(Nc1ccc(cc1F)[C@H](C(=O)NCc1ccc(nc1N1CCC(CC1)C)C(F)(F)F)C)C                | 9.800  | CHEMBL2177430 |
| Clc1cccn1N1CCC(=CC1)C(=O)Nc1ccc(cc1)C(C)(C)C                                        | 10.000 | CHEMBL482835  |
| S(=O)(=O)(Nc1ccc(cc1F)C(C=O)NCc1ccc(nc1N(CCCC)CCCC)C(F)(F)F)C                       | 10.500 | CHEMBL2178064 |
| S(=O)(=O)(Nc1ccc(cc1F)[C@@H](C(=O)NCc1ccc(nc1N1C[C@H](NC(OC(C)C)C)=O)CC1)C(F)(F)F)C | 11.000 | CHEMBL2177420 |
| FC(F)(F)c1cccn1N1CCc2c(nc2Nc2ccc(cc2)C(F)(F)F)N2CCN(CC2)CC(C)C)CC1                  | 11.000 | CHEMBL1630299 |
| FC(F)(F)c1cccn1N1CCc2c(nc2Nc2ccc(cc2)C(F)(F)F)N2CCN(CC2)C2CC2)CC1                   | 11.000 | CHEMBL1630301 |
| S(=O)(=O)(Nc1ccc(cc1F)C(C=O)NCc1ccc(nc1OCC1CCCC)C(F)(F)F)C                          | 11.600 | CHEMBL2385249 |
| FC(F)(F)c1nc(N2CCOCC2)c(cc1)CNC(=O)Nc1c2c([nH]nc2)ccc1                              | 12.000 | CHEMBL1082445 |
| FC(F)(F)c1nc(CCCOC)c(cc1)CNC(=O)Nc1c2c([nH]nc2)ccc1                                 | 12.000 | CHEMBL1086019 |
| s1enc(-c2nc3ncccc(Nc4nccc(cc4)C(F)(F)F)c3cc2)c1C(F)(F)F                             | 12.000 | CHEMBL1214341 |
| FC(F)(F)c1cccn1-c1cc2nc(nc3nccc(cc3)C(F)(F)F)c2cc1)COC                              | 12.000 | CHEMBL456572  |
| S(=O)(=O)(Nc1ccc(cc1F)C(C=O)NCc1ccc(nc1N1CCC=CC1)C(F)(F)F)C                         | 12.100 | CHEMBL2177425 |
| S(=O)(=O)(Nc1ccc(cc1F)[C@@H](C(=O)NCc1ccc(nc1OCCCC)C(F)(F)F)C)C                     | 12.300 | CHEMBL2385426 |
| S(=O)(=O)(Nc1ccc(cc1F)C(C=O)NCc1ccc(nc1OCC)C(F)(F)F)C                               | 12.700 | CHEMBL2385421 |
| FC(F)(F)c1c1c(nccc1C(=O)N)-c1nc2nccc(Nc3nccc(cc3)C(F)(F)F)c2cc1                     | 13.000 | CHEMBL1214339 |
| O=C(Nc1c2c([nH]nc2)ccc1)NCc1ccc(nc1N1CCCC1)-c1cccc1                                 | 14.000 | CHEMBL1086487 |
| Clc1cc(Nc2nc(ccc2)CNC(=O)C)C)c2cc(F)c(NS(=O)(=O)C)cc2)C(F)(F)F)c(cc1)C              | 14.000 | CHEMBL2178083 |
| S(=O)(=O)(Nc1ccc(cc1F)C(C=O)NCc1ccc(nc1OC1CCC(CC1)C(F)(F)F)C(F)(F)F)C               | 14.000 | CHEMBL2385418 |
| Clc1ccc(Cl)c1Nc1se2nnc(Nc3ccc(cc3)C(F)(F)F)c2n1                                     | 14.000 | CHEMBL467007  |
| FC(F)(F)c1cccn1-c1ccc(cc1)C(=O)Nc1ccc(cc1)C(F)(F)F                                  | 14.000 | CHEMBL378563  |
| S(Cc1occc1)c1nc(ccc1)CNC(=O)C)C)c1cc(F)c(NS(=O)(=O)C)cc1)C(F)(F)F                   | 14.600 | CHEMBL2442926 |
| S(=O)(=O)(Nc1ccc(cc1F)C(C=O)NCc1ccc(nc1N(CCC)CCC)C(F)(F)F)C                         | 14.700 | CHEMBL2178063 |
| FC(F)(F)c1cccn1N1CCc2c(nc2Nc2ccc(cc2)C(F)(F)F)C1                                    | 15.000 | CHEMBL461658  |
| FC(F)(F)c1cc(cnc1-c1nc2nccc(Nc3nccc(cc3)C(F)(F)F)c2nc1)C#N                          | 15.000 | CHEMBL1214401 |
| s1cccc1CSe1nc(ccc1)CNC(=O)C)C)c1cc(F)c(NS(=O)(=O)C)cc1)C(F)(F)F                     | 15.000 | CHEMBL2442927 |
| FC(F)(F)c1cccn1N1CCc2c(nc2Nc2ccc(cc2)C(F)(F)F)C1                                    | 15.000 | CHEMBL461658  |
| FC(F)(F)c1cccn1N1CCc2c(nc2Nc2ccc(cc2)C(F)(F)F)N2CCN(CC2)C2CCCC2)CC1                 | 15.000 | CHEMBL1630303 |
| S(=O)(=O)(Nc1ccc(cc1F)C(C=O)NCc1ccc(nc1OCCC(C)C)C(F)(F)F)C                          | 15.100 | CHEMBL2385409 |
| S(=O)(=O)(Nc1ccc(cc1F)C(C=O)NCc1ccc(nc1OCCOC)C(F)(F)F)C                             | 15.300 | CHEMBL2385404 |
| S(=O)(=O)(Nc1ccc(cc1F)C(C=O)NCc1ccc(nc1Nc1cccc1)C(F)(F)F)C                          | 15.800 | CHEMBL2178084 |



|                                                                                            |        |               |
|--------------------------------------------------------------------------------------------|--------|---------------|
| <chem>O=C(Nc1c2c([nH]ne2)ccc1)NCc1ccc(nc1N1CCCC1)C</chem>                                  | 16.000 | CHEMBL1083697 |
| <chem>S(=O)(=O)(Nc1ccc(cc1F)C(C=O)NCc1ccc(nc1OCc1ccc(cc1)CCCC)C(F)(F)F)C</chem>            | 16.000 | CHEMBL2385227 |
| <chem>FC(F)(F)c1ccnc1N1CCN(CC1)C(=O)Nc1ccc(cc1)C(F)(F)F</chem>                             | 16.000 | CHEMBL254778  |
| <chem>S(=O)(=O)(Nc1ccc(cc1F)C(C=O)NCc1ccc(nc1OCCC1N(CCCC1)C(OC(C)(C)C)=O)C(F)(F)F)C</chem> | 16.600 | CHEMBL2385220 |
| <chem>S(=O)(=O)(Nc1ccc(cc1F)C(C=O)NCc1ccc(nc1N1CCC(CC1)Cc1ccc(cc1)C)C(F)(F)F)C</chem>      | 17.000 | CHEMBL2177441 |
| <chem>S(=O)(=O)(Nc1ccc(cc1F)[C@@H](C(=O)NCc1ccc(nc1N1CCC(CC1)c1ccc(c1)C(F)(F)F)C)C</chem>  | 17.400 | CHEMBL2177435 |
| <chem>FC(F)(F)c1ccnc1N1CCc2c(nc(nc2Ne2ccc(cc2)C(C)(C)C)C(C)C)C1</chem>                     | 18.000 | CHEMBL1290584 |
| <chem>FC(F)(F)c1ccnc1N1CCc2c(nc(nc2Ne2ccc(cc2)C(C#N)(C)C)N2CCCC2)CC1</chem>                | 18.000 | CHEMBL1289152 |
| <chem>FC(F)(F)c1nc(OCCOC)c(cc1)CNC(=O)Nc1c2c([nH]ne2)ccc1</chem>                           | 18.000 | CHEMBL1086018 |
| <chem>S(=O)(=O)(Nc1ccc(cc1F)C(C=O)NCc1ccc(nc1OCc1ccc(c1)C(F)(F)F)C</chem>                  | 18.600 | CHEMBL2385223 |
| <chem>S1CCN(CC1)c1nc(Nc2ccc(cc2)C(F)(F)F)e2CCN(CCc2n1)c1ccc(c1)C(F)(F)F</chem>             | 19.000 | CHEMBL1289712 |
| <chem>C1c1ccc(NC(=O)C=2CCN(CC=2)c2ccc(c2)C(F)(F)F)cc1</chem>                               | 19.000 | CHEMBL489400  |
| <chem>Fe1ccnc1N1CCC(=CC1)C(=O)Nc1ccc(cc1)C(C)(C)C</chem>                                   | 19.000 | CHEMBL491035  |
| <chem>S(=O)(=O)(Nc1ccc(cc1F)C(C=O)NCc1ccc(nc1N(C)C)C(F)(F)F)C</chem>                       | 19.100 | CHEMBL2178061 |
| <chem>S(=O)(=O)(Nc1ccc(cc1F)C(C=O)NCc1ccc(nc1NCC1CCN(CC1)C(OC(C)(C)C)=O)C(F)(F)F)C</chem>  | 19.300 | CHEMBL2178079 |
| <chem>S(=O)(=O)(Nc1ccc(cc1F)C(C=O)NCc1ccc(nc1OCC1CCCC1)C(F)(F)F)C</chem>                   | 19.700 | CHEMBL2385250 |
| <chem>S(=O)(=O)(Nc1ccc(cc1F)C(C=O)NCc1ccc(nc1N1CCC(F)CC1)C(F)(F)F)C</chem>                 | 19.800 | CHEMBL2177404 |
| <chem>S(=O)(=O)(Nc1ccc(cc1F)C(C=O)NCc1ccc(nc1N1CCCC1)C(F)(F)F)C</chem>                     | 20.400 | CHEMBL2178077 |
| <chem>FC(F)(F)c1ccnc1N1CCc2c(nc(nc2Ne2ccc(cc2)C(F)(F)F)N2CCCC2)CC1</chem>                  | 21.000 | CHEMBL1290255 |
| <chem>S(=O)(=O)(Nc1ccc(cc1F)C(C=O)NCc1ccc(nc1N(CCCC)C)C(F)(F)F)C</chem>                    | 21.300 | CHEMBL2178065 |
| <chem>S(=O)(=O)(Nc1ccc(cc1F)C(C=O)NCc1ccc(nc1N1CCN(CC1)C1CCCC1)C(F)(F)F)C</chem>           | 21.600 | CHEMBL2179145 |
| <chem>FC(F)(F)c1ccnc1-c1cc2nc(nc(Nc3ccc(cc3)C(F)(F)F)c2cc1)CCO</chem>                      | 22.000 | CHEMBL456358  |
| <chem>S(c1nc(ccc1)CNC(=O)[C@@H](C)c1ccc(F)c(NS(=O)(=O)C)cc1)C(F)(F)F)C1CCCC1</chem>        | 22.300 | CHEMBL2442912 |
| <chem>S(=O)(=O)(Nc1ccc(cc1F)C(C=O)NCc1ccc(nc1N1CCN(CC1)c1ccc(F)cc1)C(F)(F)F)C</chem>       | 23.100 | CHEMBL2179150 |
| <chem>S(=O)(=O)(Nc1ccc(cc1F)C(C=O)NCc1ccc(nc1OCCC(C)(C)C)C(F)(F)F)C</chem>                 | 23.800 | CHEMBL2385410 |
| <chem>S(=O)(=O)(C(F)(F)F)c1ccc(NC(=O)C=2CCN(CC=2)c2ccc(c2)C(F)(F)F)cc1</chem>              | 24.000 | CHEMBL482834  |
| <chem>S(=O)(=O)(Nc1ccc(cc1F)C(C=O)NCc1ccc(nc1N1CCC(CC1)Cc1cc(F)cc(F)c1)C(F)(F)F)C</chem>   | 24.000 | CHEMBL2177402 |
| <chem>FC(F)(F)c1ccnc1N1CCc2c(nc(nc2Ne2ccc(cc2)C(F)(F)F)N2CCN(CC2)C2CCC2)CC1</chem>         | 24.000 | CHEMBL1630302 |
| <chem>FC(F)(F)c1ccnc1-c1cc2nc(nc(Nc3ccc(nc3)C(F)(F)F)c2cc1)CN1CCOCC1</chem>                | 24.000 | CHEMBL456127  |
| <chem>FC(F)(F)c1ccnc1N1CCc2c(nc(nc2Ne2ccc(cc2)C(C)(C)C)C(C)C)C1</chem>                     | 25.000 | CHEMBL1290704 |
| <chem>S(=O)(=O)(N(C)C)c1ccc(Nc2nc(nc3c2CCN(CC3)c2ccc(c2)C(F)(F)F)N2CCCC2)cc1</chem>        | 25.000 | CHEMBL1289818 |
| <chem>S(=O)(=O)(Nc1ccc(cc1F)C(C=O)NCc1ccc(nc1OCc1ccc(F)cc1)C(F)(F)F)C</chem>               | 25.000 | CHEMBL2385229 |
| <chem>S(=O)(=O)(Nc1ccc(cc1F)C(C=O)NCc1ccc(nc1N1CCC(CC1)c1ccc(c1)C(F)(F)F)C)C</chem>        | 25.000 | CHEMBL2177434 |
| <chem>FC(F)(F)c1ccnc1-c1cc2nc(nc(Nc3ccc(nc3)C(F)(F)F)c2cc1)COC</chem>                      | 25.000 | CHEMBL463578  |

|                                                                             |        |               |
|-----------------------------------------------------------------------------|--------|---------------|
| FC(F)(F)c1ccnc1-c1cc2nc(nc(Nc3ccc(cc3)C(F)(F)F)c2cc1)CN1CCCC1               | 25.000 | CHEMBL457843  |
| FC(F)(F)c1ccnc1-c1cc2nc(nc(Nc3ccc(cc3)C(F)(F)F)c2cc1)CCCO                   | 25.000 | CHEMBL464386  |
| S(=O)(=O)(Nc1ccc(cc1F)C(C=O)NCc1ccc(nc1N1CCCCC1)C(F)(F)F)C                  | 25.100 | CHEMBL2177418 |
| FC(F)(F)c1ccnc1-c1nc2nccc(Nc3nc(C#N)c(en3)C(F)(F)F)c2cc1                    | 25.400 | CHEMBL1214207 |
| S(=O)(=O)(Nc1ccc(cc1F)C(C=O)NCc1ccc(nc1N1CC(C(C1)C)C)C(F)(F)F)C             | 25.600 | CHEMBL2177433 |
| FC(F)(F)c1ccnc1-c1cc2nc(nc(Nc3ccc(cc3)C(F)(F)F)c2cc1)CNC                    | 26.000 | CHEMBL462981  |
| O=C(Nc1ccc(cc1)C(C)(C)C)=1CCN(CC=1)c1ncccc1                                 | 27.000 | CHEMBL491034  |
| FC(F)(F)c1ccc(nc1-c1nc2nccc(Nc3ncc(cc3)C(F)(F)F)c2nc1)C(O)=O                | 27.000 | CHEMBL1214403 |
| S(=O)(=O)(Nc1ccc(cc1F)C(C=O)NCc1ccc(nc1N1CC(C(C1)C)C)C(F)(F)F)C             | 27.200 | CHEMBL2178078 |
| S(=O)(=O)(Nc1ccc(cc1F)C(C=O)NCc1ccc(nc1OCCCC)C(F)(F)F)C                     | 27.300 | CHEMBL2385424 |
| S(CCCN(C)C)c1nc(ccc1CNC(=O)C)C)c1cc(F)c(NS(=O)(=O)C)cc1)C(F)(F)F            | 27.400 | CHEMBL2442902 |
| S(=O)(=O)(Nc1ccc(cc1F)C(C=O)NCc1ccc(nc1OCCc1ccccc1)C(F)(F)F)C               | 27.600 | CHEMBL2385224 |
| S(=O)(=O)(Nc1ccc(cc1F)C(C=O)NCc1ccc(nc1N1CCCCC1)C(F)(F)F)C                  | 27.800 | CHEMBL2177419 |
| S(=O)(=O)(Nc1ccc(cc1F)C(C=O)NCc1ccc(nc1N1CCC(OCCCC)CC1)C(F)(F)F)C           | 28.200 | CHEMBL2177411 |
| S(=O)(=O)(Nc1ccc(cc1F)C(C=O)NCc1ccc(nc1OC1CCCC1)C(F)(F)F)C                  | 28.700 | CHEMBL2385416 |
| FC(F)(F)c1ccnc1-c1cc2nccc(Nc3ccc(cc3)C(F)(F)F)c2cc1                         | 29.000 | CHEMBL1092544 |
| S(=O)(=O)(Nc1ccc(cc1F)C(C=O)NCc1ccc(nc1OCc1ncccc1)C(F)(F)F)C                | 29.500 | CHEMBL2385216 |
| S(=O)(=O)(Nc1ccc(cc1F)C(C=O)NCc1ccc(nc1OCCCC)C(F)(F)F)C                     | 29.900 | CHEMBL2385425 |
| Brc1cc(C(F)(F)F)c(nc1)-c1nc2nccc(Nc3ncc(cc3)C(F)(F)F)c2nc1                  | 30.000 | CHEMBL1214400 |
| S(=O)(=O)(Nc1ccc(cc1F)C(C=O)NCc1ccc(nc1N1CCC(CC1)Cc1cc(F)c(F)cc1)C(F)(F)F)C | 30.000 | CHEMBL2178059 |
| S(=O)(=O)(Nc1ccc(cc1F)C(C=O)NCc1ccc(nc1OCCCC)C(F)(F)F)C                     | 30.500 | CHEMBL2385423 |
| S(=O)(=O)(Nc1ccc(cc1F)C(C=O)NCc1ccc(nc1N1CCN(CC1)c1ccccc1)C(F)(F)F)C        | 30.700 | CHEMBL2179146 |
| FC(F)(F)c1ccnc1N1CCc2c(nc(nc2Ne2ccc(cc2)C(F)(F)F)C2CC2)CC1                  | 31.000 | CHEMBL1289150 |
| S(=O)(=O)(Nc1ccc(cc1F)C(C=O)NCc1ccc(nc1N1CCC(CC1)COC)C(F)(F)F)C             | 31.000 | CHEMBL2177410 |
| S(=O)(=O)(Nc1ccc(cc1F)C(C=O)NCc1ccc(nc1N1CCC(CC1)C(F)(F)F)C(F)(F)F)C        | 31.000 | CHEMBL2177405 |
| FC(F)(F)c1ccnc1N1C[C@H](N(CC1)c1[nH]c2cc(ccc2n1)C(C)(C)C                    | 32.000 | CHEMBL254984  |
| Clc1ccnc1N1CCC(=CC1)C(=O)Nc1ccc(Cl)cc1                                      | 33.000 | CHEMBL488972  |
| O(CC(=O)Nc1ccc(nc1)N(CCO)c1ccc(cc1)C(C)(C)C                                 | 33.000 | CHEMBL2380435 |
| S(=O)(=O)(Nc1ccc(cc1F)C(C=O)NCc1ccc(nc1N1CCN(CC1)c1ccccc1)C(F)(F)F)C        | 34.000 | CHEMBL2179149 |
| S(=O)(=O)(C(F)(F)F)c1ccc(NC(=O)C=2CCN(CC=2)c2ncccc2)cc1                     | 35.000 | CHEMBL523605  |
| FC(F)(F)c1ccnc1-c1cc2nc(nc(Nc3ccc(cc3)C(F)(F)F)c2cc1)CNC(C)C                | 35.000 | CHEMBL456545  |
| S(=O)(=O)(CCc1nc(Nc2ccc(cc2)C(F)(F)F)c2c(n1)cc(cc2)-c1ncccc1)C(F)(F)F)C     | 36.000 | CHEMBL462783  |
| FC(F)(F)c1ccnc1N1CCc2c(nc(nc2Ne2ccc(cc2)C(F)(F)F)-c2ccccc2)CC1              | 37.000 | CHEMBL1289264 |
| FC(F)(F)c1ccnc1N1CCc2c(nc(nc2Ne2ccc(cc2)C(C#N)(C)N2CCOCC2)CC1               | 37.000 | CHEMBL1289266 |

|                                                                              |        |               |
|------------------------------------------------------------------------------|--------|---------------|
| Clc1cccnc1-c1ccc(cc1)C(=O)Nc1ccc(cc1)C(C)(C)C                                | 37.000 | CHEMBL183752  |
| FC(F)(F)c1ccenc1N1CCe2e(nc(ne2Ne2nce(cc2)C(F)(F)F)N2CCOCC2)CC1               | 38.000 | CHEMBL1290143 |
| S(=O)(=O)(Nc1ccc(cc1F)C(C(=O)N)Cc1ccc(nc1N1CCN(CC1)c1ccc(cc1)C)C(F)(F)F)C)C  | 38.300 | CHEMBL2179148 |
| S(=O)(=O)(Nc1ccc(cc1F)C(C(=O)N)Cc1ccc(nc1Nc1ccc(F)cc1)C(F)(F)F)C)C           | 39.200 | CHEMBL2178081 |
| S(=O)(=O)(Nc1ccc(cc1F)C(C(=O)N)Cc1ccc(nc1N1CCN(CC1)c1ccc(cc1)C)C(F)(F)F)C)C  | 39.200 | CHEMBL2179147 |
| S(=O)(=O)(Nc1ccc(cc1F)C(C(=O)N)Cc1ccc(nc1Nc1cc(C)(cc1)C)C(F)(F)F)C)C         | 39.300 | CHEMBL2178082 |
| s1c2c(nc1C)cc(NC(=O)c1ccc(nc1C)-c1ccc(F)cc1)cc2                              | 39.810 | CHEMBL514691  |
| S(=O)(=O)(Nc1ccc(cc1F)C(C(=O)N)Cc1ccc(nc1N1CCC(CC1)Cc1ccc(cc1)C(F)(F)F)C)C   | 40.000 | CHEMBL2177440 |
| S(CCCC)c1nc(ccc1CNC(=O)C)C)c1ccc(F)c(NS(=O)(=O)C)cc1)C(F)(F)F                | 40.400 | CHEMBL2442894 |
| S(=O)(=O)(Nc1ccc(cc1F)C(C(=O)N)Cc1ccc(nc1OCC1CCC1)C(F)(F)F)C)C               | 40.500 | CHEMBL2385248 |
| Clc1cccnc1N1CCC(=CC1)C(=O)Nc1ccc(S(=O)(=O)C(F)(F)F)cc1                       | 41.000 | CHEMBL522481  |
| FC(F)(F)c1ccenc1N1CCC(=CC1)C(=O)Nc1ccc(cc1)C(C#N)(C)C                        | 41.000 | CHEMBL491241  |
| s1c2c(nc1CO)cc(NC(=O)c1ccc(OCC(F)(F)F)nc1)cc2                                | 41.000 | CHEMBL2088406 |
| FC(F)(F)c1ccenc1N1CCe2e(nc(ne2Ne2ccc(cc2)C(F)(F)F)N2CCN(CC2)C(CC)CC)CC1      | 41.000 | CHEMBL1630300 |
| FC(F)(F)c1ccenc1N1CCC(=CC1)C(=O)Nc1ccc(nc1)C(F)(F)F                          | 42.000 | CHEMBL523307  |
| O=C(Nc1ccc(cc1)C(C)(C)C)c1ccc(cc1)-c1ccc1                                    | 42.000 | CHEMBL183121  |
| Clc1cccnc1-c1ccc(cc1)C(=O)Nc1ccc(cc1)C(C(F)(F)F)(C)C                         | 42.000 | CHEMBL238016  |
| FC(F)(F)c1ccenc1N1CCe2e(nc(ne2Ne2nce(cc2)C(F)(F)F)N2CCCC2)CC1                | 43.000 | CHEMBL1290034 |
| S(=O)(=O)(Nc1ccc(cc1F)C(C(=O)N)Cc1ccc(nc1OC)C=C/CC)C(F)(F)F)C)C              | 43.000 | CHEMBL2385255 |
| S(=O)(=O)(Nc1ccc(cc1F)C(C(=O)N)Cc1ccc(nc1N1CCC(=CC1)c1ccc(cc1)C(F)(F)F)C)C   | 43.000 | CHEMBL2177437 |
| S(=O)(=O)(Nc1ccc(cc1F)C(C(=O)N)Cc1ccc(nc1OC1CCC(CC1)C)C(F)(F)F)C)C           | 43.100 | CHEMBL2385419 |
| S(=O)(=O)(Nc1ccc(cc1F)C(C(=O)N)Cc1ccc(nc1OC1CCCCC1)C(F)(F)F)C)C              | 43.400 | CHEMBL2385417 |
| S(c1nc(ccc1CNC(=O)[C@H](C)c1ccc(F)c(NS(=O)(=O)C)cc1)C(F)(F)F)C1CCCCC1        | 43.500 | CHEMBL2442913 |
| S(=O)(=O)(Nc1ccc(cc1F)C(C(=O)N)Cc1ccc(nc1OCc1ccc(OC)ccc1)C(F)(F)F)C)C        | 43.700 | CHEMBL2385235 |
| Clc1cc(NC(=O)COe2ccc(cc2)C(C)(C)C)ene1N(CCO)C                                | 44.000 | CHEMBL2380437 |
| S(=O)(=O)(Nc1ccc(cc1F)C(C(=O)N)Cc1ccc(nc1OCC1CCC(CC1)C)C(F)(F)F)C)C          | 44.400 | CHEMBL2385251 |
| S(=O)(=O)(Nc1ccc(cc1F)C(C(=O)N)Cc1ccc(nc1N1CCN(CC1)c1ccc(OC)cc1)C(F)(F)F)C)C | 44.500 | CHEMBL2179152 |
| S(=O)(=O)(Nc1ccc(cc1F)C(C(=O)N)Cc1ccc(nc1N1CCC(OC(=O)C(C)(C)CC1)C(F)(F)F)C)C | 45.200 | CHEMBL2177414 |
| P(OCc1nc(Nc2ccc(cc2)C(F)(F)F)e2c(nc1)cc(cc2)-c1ccc1C(F)(F)F)(O)(O)=O         | 46.000 | CHEMBL456982  |
| S(=O)(=O)(Nc1ccc(cc1F)C(C(=O)N)Cc1ccc(nc1N1CCCCC1)C(F)(F)F)C)C               | 46.700 | CHEMBL2177424 |
| s1cc(nc1Nc1e2ccc(nc2nce1)-c1ccc1C(F)(F)F)C(F)(F)F                            | 47.000 | CHEMBL1214264 |
| S(CCC(OC)=O)c1nc(ccc1CNC(=O)C)C)c1ccc(F)c(NS(=O)(=O)C)cc1)C(F)(F)F           | 48.200 | CHEMBL2442908 |
| FC(F)(F)c1ccenc1-c1nc2ccc(Nc3nc(C(=O)N)c(c3)C(F)(F)F)e2cc1                   | 48.700 | CHEMBL1214208 |
| S(=O)(=O)(Nc1ccc(cc1F)C(C(=O)N)Cc1ccc(nc1OCCOC)C(F)(F)F)C)C                  | 49.000 | CHEMBL2385256 |

|                                                                                 |        |               |
|---------------------------------------------------------------------------------|--------|---------------|
| s1e2c(nc1C)cc(NC(=O)c1ccc(nc1C)-c1ccc(F)cc1)cc2                                 | 49.000 | CHEMBL514691  |
| S(=O)(=O)(Nc1ccc(cc1F)C(C(=O)NCc1ccc(nc1OCCOCC)C(F)(F)C)C                       | 50.000 | CHEMBL2385257 |
| S(=O)(=O)(Nc1ccc(cc1F)[C@@H](C(=O)NCc1ccc(nc1N1C[C@H](OCc2ccccc2)CC1)C(F)(F)C)C | 50.000 | CHEMBL2178072 |
| FC(F)(F)c1cccnc1-c1cc2nc(nc3ccc(cc3)C(F)(F)F)c2cc1CCN1CCCC1                     | 50.000 | CHEMBL457197  |
| FC(F)(F)c1cccnc1N1CCc2c(nc3ccc(cc2)C(F)(F)C(C)C)CC1                             | 51.000 | CHEMBL1289151 |
| S(=O)(=O)(Nc1ccc(cc1F)C(C(=O)NCc1ccc(nc1OCc1cccnc1)C(F)(F)C)C                   | 51.000 | CHEMBL2385218 |
| S(=O)(=O)(N(C)C)c1ccc(Nc2nc(nc3c2CCN(CC3)c2ccc2C(F)(F)N2CCOCC2)cc1              | 52.000 | CHEMBL1289934 |
| S(=O)(=O)(Nc1ccc(cc1F)C(C(=O)NCc1ccc(nc1OCc1cccnc1)C(F)(F)C)C                   | 52.300 | CHEMBL2385223 |
| S(=O)(=O)(Nc1ccc(cc1F)C(C(=O)NCc1ccc(nc1OCC(C)C)C(F)(F)C)C                      | 52.600 | CHEMBL2385408 |
| S(=O)(=O)(Nc1ccc(cc1F)C(C(=O)NCc1ccc(nc1OCc1ccc(cc1)C)C(F)(F)C)C                | 53.000 | CHEMBL2385225 |
| FC(F)(F)c1cccnc1N1CCc2c(nc3ccc(cc2)C(F)(F)N(C)C2CCCN(C2)C(OC(C)C)C)C)CC1        | 53.000 | CHEMBL1630628 |
| FC(F)(F)c1cccnc1N1CCc2c(nc3ccc(cc2)C(F)(F)N(C)C)CC1                             | 56.000 | CHEMBL1289383 |
| FC(F)(F)c1cccnc1N1CCc2c(nc3ccc(cc2)C(O)(C)N2CCOCC2)CC1                          | 56.000 | CHEMBL1289036 |
| S(=O)(=O)(Nc1ccc(cc1F)C(C(=O)NCc1ccc(nc1N(C)c1cccnc1)C(F)(F)C)C                 | 57.400 | CHEMBL2178066 |
| FC(F)(F)c1cccnc1N1CCc2c(nc3ccc(cc2)C(C(=O)O)(C)N2CCCC2)CC1                      | 58.000 | CHEMBL1289501 |
| O(CC(=O)Nc1ccc(nc1)N(C)C)c1ccc(cc1)C(C)C                                        | 59.000 | CHEMBL2380433 |
| S(=O)(=O)(Nc1ccc(cc1F)C(C(=O)NCc1ccc(nc1Nc1cccnc1)C(F)(F)C)C                    | 59.600 | CHEMBL2178080 |
| FC(F)(F)c1cccnc1N1CCc2c(nc3ccc(cc2)C(F)(F)N2CCCC2)CC1                           | 61.000 | CHEMBL1289500 |
| FC(F)(F)c1cccnc1N1CCc2c(nc3ccc(cc2)C(F)(F)N2CC(N(C(=O)C)C)CC2)CC1               | 62.000 | CHEMBL1630622 |
| FC(F)(F)c1cccnc1-c1cc2nc(nc3ccc(cc3)C(F)(F)F)c2cc1CN1CCN(CC1)C                  | 62.000 | CHEMBL456990  |
| FC(F)(F)c1cccnc1N1CCN(CC1)C(=O)Nc1ccc(cc1)C(F)F                                 | 65.000 | CHEMBL254778  |
| FC(F)(F)c1cccnc1N1CCc2c(nc3ccc(cc2)C(F)(F)N2CCN(CC2)CCOC)CC1                    | 65.000 | CHEMBL1630304 |
| C1c1ccc(cc1)CNc1ccc(cc1)CNC(=O)C(C)c1ccc(F)c(NS(=O)(=O)C)cc1)C(F)(F)F           | 65.700 | CHEMBL2178085 |
| S(=O)(=O)(Nc1ccc(cc1F)C(C(=O)NCc1ccc(nc1OCc1ccc(cc1)C(F)(F)C(F)(F)C)C           | 66.100 | CHEMBL2385231 |
| S(=O)(=O)(C(F)(F)F)c1ccc(NC(=O)C=2CCN(CC=2)c2ccc2F)cc1                          | 67.000 | CHEMBL489570  |
| S(=O)(=O)(Nc1ccc(cc1F)C(C(=O)NCc1ccc(nc1OCC(C)C)C(F)(F)C)C                      | 67.500 | CHEMBL2385408 |
| BrCCSc1ccc(cc1)CNC(=O)C(C)c1ccc(F)c(NS(=O)(=O)C)cc1)C(F)(F)F                    | 68.000 | CHEMBL2442899 |
| S(=O)(=O)(Nc1ccc(cc1F)C(C(=O)NCc1ccc(nc1OC)C(F)(F)C)C                           | 68.800 | CHEMBL2385420 |
| S(=O)(=O)(Nc1ccc(cc1F)C(C(=O)NCc1ccc(nc1OCc1ccc(F)ccc1)C(F)(F)C)C               | 69.000 | CHEMBL2385233 |
| FC(F)(F)c1cccnc1-c1cc2nc(nc3ccc(cc3)C(F)(F)F)c2cc1CCN1CCN(CC1)C                 | 69.000 | CHEMBL514248  |
| S(=O)(=O)(Nc1ccc(cc1F)C(C(=O)NCc1ccc(nc1OC1CCCC1)C(F)(F)C)C                     | 69.800 | CHEMBL2385415 |
| FC(F)(F)c1cccnc1N1CCc2c(nc3ccc(cc2)C(F)(F)C(C)C)CC1                             | 70.000 | CHEMBL1290144 |
| [nH]1c2ccc(cc2nc1N1CCN(C[C@H]1C)c1cccnc1)C(C)C                                  | 70.000 | CHEMBL403013  |
| S(Cc1ccc(cc1)C(F)(F)F)c1ccc(cc1)CNC(=O)C(C)c1ccc(F)c(NS(=O)(=O)C)cc1)C(F)(F)F   | 71.000 | CHEMBL2442925 |

|                                                                              |         |               |
|------------------------------------------------------------------------------|---------|---------------|
| S(=O)(=O)(Nc1ccc(cc1F)C(C(=O)NCc1ccc(nc1OCc1cc(OC)cc(OC)c1)C(F)(F)F)C)C      | 76.000  | CHEMBL2385238 |
| Clc1ccc(NC(=O)C=2CCN(CC=2)c2ncccc2Cl)cc1F                                    | 78.000  | CHEMBL488782  |
| O=C(Nc1ccc(cc1)C(C)(C)C)C=1CCN(CC=1)c1ncccc1C#N                              | 78.000  | CHEMBL491033  |
| FC(F)(F)c1cccnc1-c1nc2c(nc1c(nc2)Nc1ccc(cc1)C(F)(F)F                         | 79.000  | CHEMBL1092192 |
| FC(F)(F)c1ccene1N1CCc2c(nc2Nc2ccc(cc2)C(C)(C)C)C1                            | 80.000  | CHEMBL1290478 |
| Clc1nc(nc1C(F)(F)F)Nc1c2ccc(nc2nc1)-c1ncccc1C(F)(F)F                         | 81.000  | CHEMBL1214206 |
| S(=O)(=O)(Nc1ccc(cc1F)C(C(=O)NCc1ccc(nc1N1CCC(CC1)c1ccc(F)cc1)C(F)(F)F)C)C   | 81.000  | CHEMBL2177438 |
| FC(F)(F)c1ccene1-c1cc2nc(nc2Nc3ccc(cc3)C(F)(F)F)c2cc1)COCC(O)=O              | 81.000  | CHEMBL456151  |
| S(CCC(C)C)c1nc(cc1CNC(=O)C(C)C)c1cc(F)c(NS(=O)(=O)C)cc1)C(F)(F)F             | 82.000  | CHEMBL2442897 |
| S(CCC(=O)N1CCCC1)c1nc(cc1CNC(=O)C(C)C)c1cc(F)c(NS(=O)(=O)C)cc1)C(F)(F)F      | 85.000  | CHEMBL2442909 |
| s1c2c(nc1CO)cc(NC(=O)c1ccc(nc1)N1CCCC1)cc2                                   | 85.600  | CHEMBL2088405 |
| Brc1ccc(cc1OCC(=O)Nc1ccc(nc1)N(CCO)C(C)(C)C                                  | 86.000  | CHEMBL2380571 |
| FC(F)(F)c1ccene1N1CCc2c(nc2Nc2ccc(cc2)C(F)(F)F)N2CCC2)CC1                    | 87.000  | CHEMBL1289384 |
| S(c1nc(cc1CNC(=O)C(C)C)c1cc(F)c(NS(=O)(=O)C)cc1)C(F)(F)F)C1CCC(CC1)C(C)(C)C  | 89.600  | CHEMBL2442919 |
| Clc1ccnc1N1C[C@H](N(CC1)c1[nH]e2cc(ccc2n1)C(C)(C)C)C                         | 90.000  | CHEMBL254779  |
| S(=O)(=O)(Nc1ccc(cc1F)C(C(=O)NCc1ccc(nc1OCCC)C(F)(F)F)C)C                    | 90.100  | CHEMBL2385422 |
| S(=O)(=O)(Nc1ccc(cc1F)C(C(=O)NCc1ccc(nc1N1CCC(=O)CC1)C(F)(F)F)C)C            | 91.000  | CHEMBL2177406 |
| FC(F)(F)c1ccene1N1CCc2c(nc2Nc2ccc(cc2)C(F)(F)F)N2CCN(CC2)C(C)C)CC1           | 91.000  | CHEMBL1630298 |
| S(=O)(=O)(Nc1ccc(cc1F)C(C(=O)NCc1ccc(nc1OCc1cc(F)cc(F)c1)C(F)(F)F)C)C        | 93.000  | CHEMBL2385236 |
| S(=O)(=O)(Nc1ccc(cc1F)C(C(=O)NCc1ccc(nc1OC(C)C)C(F)(F)F)C)C                  | 93.400  | CHEMBL2385407 |
| Clc1ccc(cc1)COc1nc(ccc1CNC(=O)C(C)C)c1cc(F)c(NS(=O)(=O)C)cc1)C(F)(F)F        | 95.000  | CHEMBL2385234 |
| S(CCCCC)c1nc(ccc1CNC(=O)C(C)C)c1cc(F)c(NS(=O)(=O)C)cc1)C(F)(F)F              | 95.600  | CHEMBL2442895 |
| s1c2c(nc1C)cc(NC(=O)c1ccc(nc1C)-c1ccc(F)cc1)cc2                              | 96.000  | CHEMBL514691  |
| FC(F)(F)c1ccene1N1CCc2c(nc2Nc2ccc(cc2)C(F)(F)F)C)CC1                         | 97.000  | CHEMBL1289035 |
| S(=O)(=O)(Nc1ccc(cc1F)C(C(=O)NCc1ccc(nc1N1CCC(CC1)CC)C(F)(F)F)C)C            | 97.300  | CHEMBL2177431 |
| s1c2c(nc1C)cc(NC(=O)c1ccc(nc1C)-c1ccc(F)cc1)cc2                              | 100.000 | CHEMBL514691  |
| FC(F)(F)c1ccene1N1CCc2c(nc2Nc2ccc(cc2)C(F)(F)F)NCC2NCCCC2)CC1                | 100.000 | CHEMBL1630632 |
| S(=O)(=O)(Nc1ccc(cc1F)[C@@H](C(=O)NCc1ccc(nc1N1C[C@H](N(C)C)CC1)C(F)(F)F)C)C | 101.000 | CHEMBL2178073 |
| S(=O)(=O)(Nc1ccc(cc1F)[C@@H](C(=O)NCc1ccc(nc1N1C[C@H](N(C)C)CC1)C(F)(F)F)C)C | 103.000 | CHEMBL2178074 |
| Clc1ccnc1N1C[C@H](N(CC1)c1[nH]e2cc(ccc2n1)C(C)(C)C)C                         | 104.000 | CHEMBL254779  |
| O(CC(=O)Nc1ccc(nc1)N(CCO)C)c1ccc(cc1C(C)(C)C)C(C)(C)C                        | 107.000 | CHEMBL2380570 |
| S(=O)(=O)(Nc1ccc(cc1F)C(C(=O)NCc1ccc(nc1N1CCN(CC1)c1ncccc1)C(F)(F)F)C)C      | 108.000 | CHEMBL2179153 |
| O(CC(=O)Nc1ccc(nc1)N(CCO)C)c1ccc(cc1)C(C)C                                   | 110.000 | CHEMBL2380567 |
| S(CCc1ccc(c1)c1nc(ccc1CNC(=O)C(C)C)c1cc(F)c(NS(=O)(=O)C)cc1)C(F)(F)F         | 111.000 | CHEMBL2442928 |



|                                                                                 |         |               |
|---------------------------------------------------------------------------------|---------|---------------|
| Clc1ccc(cc1Cl)c1COe1nc(ccc1CNC(=O)C(C)c1cc(F)c(NS(=O)(=O)C)cc1)C(F)(F)F         | 114.000 | CHEMBL2385237 |
| S(=O)(=O)(Nc1ccc(cc1F)C(C(=O)NCc1ccc(nc1OCC1CC1)C(F)(F)F)C)C                    | 115.000 | CHEMBL2385082 |
| FC(F)(F)c1nc(N2CCOCC2)c(cc1)C=C(C(=O)Nc1cc2ncccc2cc1                            | 116.000 | CHEMBL191247  |
| Clc1cccnc1N1CCN(CC1)c1nc(ccc1CNC(=O)C(C)c1cc(F)c(NS(=O)(=O)C)cc1)C(F)(F)F       | 117.000 | CHEMBL2179154 |
| S(=O)(=O)(Nc1ccc(cc1F)C(C(=O)NCc1ccc(nc1N1CCN(CC1)c1ccc(cc1)C(F)(F)F)C(F)(F)C)C | 117.000 | CHEMBL2179151 |
| S(CCOe1cccc1)c1nc(ccc1CNC(=O)C(C)c1cc(F)c(NS(=O)(=O)C)cc1)C(F)(F)F              | 118.000 | CHEMBL2442900 |
| Brc1cccc1NC(=O)N[C@H]1CCN(C1)c1ncc(cc1)C(F)(F)F                                 | 120.000 | CHEMBL2380430 |
| Clc1cc(NC(=O)C=2CCN(CC=2)c2ncccc2Cl)ccc1Cl                                      | 124.000 | CHEMBL491225  |
| O1CCN(CC1)c1nc(ccc1CNC(=O)Nc1c2c([nH]nc2)ccc1)C                                 | 125.000 | CHEMBL1082446 |
| S(=O)(=O)(Nc1ccc(cc1F)C(C(=O)NCc1ccc(nc1OC1CCC(CC1)CC)C(F)(F)F)C)C              | 125.000 | CHEMBL2385239 |
| FC(F)(F)c1cccnc1N1CCc2c(nc(nc2Ne2ncc(cc2)C(F)(F)F)C(C)C)CC1                     | 130.000 | CHEMBL1289933 |
| O(CC(=O)Nc1cc(C)c(nc1)N(CCO)C)c1ccc(cc1)C(C)(C)C                                | 130.000 | CHEMBL2380436 |
| Clc1ccc(cc1)COe1nc(ccc1CNC(=O)C(C)c1cc(F)c(NS(=O)(=O)C)cc1)C(F)(F)F             | 132.000 | CHEMBL2385230 |
| FC(F)(F)c1cccnc1N1CCc2c(nc(nc2Ne2ncc(cc2)C(F)(F)F)N2CCN(CC2)CC)CC1              | 132.000 | CHEMBL1630297 |
| FC(F)(F)c1cncnc1-c1nc2nccc(Nc3ncc(cc3)C(F)(F)F)c2cc1                            | 134.000 | CHEMBL1214267 |
| S(=O)(=O)(Nc1ccc(cc1F)C(C(=O)NCc1ccc(nc1N1CCC(OC(=O)C)CC1)C(F)(F)F)C)C          | 139.000 | CHEMBL2177413 |
| S(=O)(=O)(Nc1ccc(cc1F)C(C(=O)NCc1ccc(nc1OC1CCC(CC1)(C)C)C(F)(F)F)C)C            | 140.000 | CHEMBL2385241 |
| Clc1cc(Nc2nc(ccc2CNC(=O)C(C)c2cc(F)c(NS(=O)(=O)C)cc2)C(F)(F)F)c(cc1)C           | 140.000 | CHEMBL2178083 |
| FC(F)(F)c1cccnc1N1CCc2c(nc(nc2Ne2ncc(cc2)C(F)(F)F)N2CCCN(C2)C(OC(C)C)=O)CC1     | 140.000 | CHEMBL1630625 |
| S(=O)(=O)(Nc1ccc(cc1F)C(C(=O)NCc1ccc(nc1OCc1cccnc1)C(F)(F)F)C)C                 | 142.000 | CHEMBL2385217 |
| S(=O)(=O)(Nc1ccc(cc1F)C(C(=O)NCc1ccc(nc1N1CCN(CC1)C)C(F)(F)F)C)C                | 146.000 | CHEMBL2179144 |
| S(=O)(=O)(Nc1ccc(cc1F)C(C(=O)NCc1ccc(nc1N(CC)CC)C(F)(F)F)C)C                    | 148.000 | CHEMBL2178062 |
| FC(F)(F)c1cccnc1N1CCc2c(nc(nc2Ne2ncc(cc2)C(F)(F)F)N2CCN(C(=O)C)CC2)CC1          | 150.000 | CHEMBL1630620 |
| S(=O)(=O)(Nc1ccc(cc1F)C(C(=O)NCc1ccc(nc1N1CCC(=CC1)c1ccc(F)cc1)C(F)(F)F)C)C     | 159.000 | CHEMBL2177439 |
| FC(F)(F)c1cccnc1N1CCN(CC1)C(=O)Nc1ncc(cc1)C(F)(F)F                              | 160.000 | CHEMBL254778  |
| FC(F)(F)c1ncccc1-c1nc2nccc(Nc3ncc(cc3)C(F)(F)F)c2cc1                            | 161.000 | CHEMBL1214265 |
| S(=O)(=O)(Nc1ccc(cc1F)C(C(=O)NCc1ccc(nc1OCC1CC1)C(C)C)C(F)(F)F)C)C              | 161.000 | CHEMBL2385247 |
| S(=O)(=O)(Nc1ccc(cc1F)C(C(=O)NCc1ccc(nc1OCCCOe1cccc1)C(F)(F)F)C)C               | 161.000 | CHEMBL2385406 |
| S(=O)(=O)(Nc1ccc(cc1F)C(C(=O)NCc1ccc(nc1OCc1ccc(cc1)CC)C(F)(F)F)C)C             | 165.000 | CHEMBL2385226 |
| S(=O)(=O)(Nc1ccc(cc1F)C(C(=O)NCc1ccc(nc1N1CCOCC1)C(F)(F)F)C)C                   | 169.000 | CHEMBL2177400 |
| S(=O)(=O)(Nc1ccc(cc1F)C(C(=O)NCc1ccc(nc1OC1CC(CC1)C)C)C(F)(F)F)C)C              | 174.000 | CHEMBL2385242 |
| Clc1cc(ene1N1CCc2c(nc(nc2Ne2ncc(cc2)C(F)(F)F)N2CCOCC2)CC1)C(OC)=O               | 176.000 | CHEMBL1290588 |
| FC(F)(F)c1cccnc1N1CCc2c(nc(nc2Ne2ncc(cc2)C(O)(C)C)C(C)C)CC1                     | 180.000 | CHEMBL1290587 |
| S(c1ccc1CNC(=O)C(C)c1cc(F)c(NS(=O)(=O)C)cc1)C(F)(F)F1CCC(CC1)C                  | 180.000 | CHEMBL2442916 |

|                                                                               |         |               |
|-------------------------------------------------------------------------------|---------|---------------|
| S(=O)(=O)(Nc1ccc(cc1F)C(C(=O)NCc1ccc(nc1OCc1ccc(cc1)C(C)C)C(F)F)C)C           | 182.000 | CHEMBL2385228 |
| S(=O)(=O)(Nc1ccc(cc1F)C(C(=O)NCc1ccc(nc1OC)C=C)C(F)F)C)C                      | 183.000 | CHEMBL2385254 |
| O(C)c1ccc(cc1)C(Cc1ccnc1)CNC(=O)Nc1c2c(ccc1)nc2                               | 184.000 | CHEMBL250169  |
| FC(F)(F)c1ccc(cc1)CNC(=O)Nc1c2c([nH]nc2)ccc1                                  | 184.000 | CHEMBL1085724 |
| FC(F)(F)c1ccnc1-c1cc2nc(nc1c3ccc(cc3)C(F)F)F)2cc1)CCCN1CCCC1                  | 184.000 | CHEMBL458925  |
| FC(F)(F)c1ccnc1N1CCc2c(nc1c2Nc2ccc(cc2)C(F)F)N2C[C@H](N(C)C)CC2)CC1           | 185.000 | CHEMBL1630624 |
| FC(F)(F)c1ccnc1N1CCc2c(nc1c2Nc2ccc(cc2)C(F)F)CC1                              | 188.000 | CHEMBL1289034 |
| S(=O)(=O)(Nc1ccc(cc1F)C(C(=O)NCc1ccc(nc1N1Cc2c(C1)cccc2)C(F)F)C)C             | 192.000 | CHEMBL2177422 |
| Clc1ccnc1N1CCC(CC1)C(=O)Nc1ccc(cc1)C(C)C)C                                    | 196.000 | CHEMBL491816  |
| Clc1ccnc1-c1ccc(cc1)C(=O)Nc1ccc(cc1)C(F)F                                     | 200.000 | CHEMBL217147  |
| S(=O)(=O)(Nc1ccc(cc1F)C(C(=O)NCc1ccc(nc1Nc1ccc(cc1)C(F)F)C)C                  | 203.000 | CHEMBL2178084 |
| S(=O)(=O)(Nc1ccc(cc1F)[C@H](C(=O)NCc1ccc(nc1N1CCC[C@H]1C(OC(C)C)C)O)C(F)F)C)C | 209.000 | CHEMBL2178071 |
| S(=O)(=O)(Nc1ccc(cc1F)C(C(=O)NCc1ccc(nc1N1CCCC1)C(F)F)C)C                     | 211.000 | CHEMBL2178067 |
| S(CCCN1CCCC1)C)c1nc(ccc1)CNC(=O)C(C)c1cc(F)c(NS(=O)(=O)C)cc1)C(F)F            | 217.000 | CHEMBL2442905 |
| S(=O)(=O)(Nc1ccc(cc1F)C(C(=O)NCc1ccc(nc1N1CCCC1)C(F)F)C)C                     | 218.000 | CHEMBL2177423 |
| FC(F)(F)c1ccnc1N1CCc2c(nc1c2Nc2ccc(cc2)C(C)O)(C)N2CCOCC2)CC1                  | 230.000 | CHEMBL1289608 |
| S(=O)(=O)(Nc1ccc(cc1F)C(C(=O)NCc1ccc(nc1OC1CCC(CC1)C(C)C)C(F)F)C)C            | 242.000 | CHEMBL2385240 |
| FC(F)(F)c1ccnc1N1CCc2c(nc1c2Nc2ccc(cc2)C(F)F)N2C[C@H](N(C)C)CC2)CC1           | 243.000 | CHEMBL1630623 |
| S(CCCN1CCCC1)c1nc(ccc1)CNC(=O)C(C)c1cc(F)c(NS(=O)(=O)C)cc1)C(F)F              | 250.000 | CHEMBL2442904 |
| FC(F)(F)c1ccnc1N1CCc2c(nc1c2Nc2ccc(cc2)C(F)F)NCC2N(CCCC2)C(OC(C)C)O)CC1       | 250.000 | CHEMBL1630631 |
| S(=O)(=O)(Nc1ccc(cc1F)[C@H](C(=O)NCc1ccc(nc1N1CCC(CC1)C)C(F)F)C)C             | 254.000 | CHEMBL2177430 |
| S(C1CCCC1)c1nc(ccc1)CNC(=O)C(C)c1cc(F)c(NS(=O)(=O)C)cc1)C(F)F                 | 254.000 | CHEMBL2442920 |
| S(=O)(=O)(Nc1ccc(cc1F)C(C(=O)NCc1ccc(nc1N1CCCC1)C(F)F)C)C                     | 260.000 | CHEMBL2178077 |
| FC(F)(F)c1ccnc1N1CCN(CC1)C(Oc1ccc(cc1)C(C)C)O                                 | 260.000 | CHEMBL1079443 |
| S(=O)(=O)(Nc1ccc(cc1F)C(C(=O)NCc1ccc(nc1OCC)C(F)F)C)C                         | 277.000 | CHEMBL2385421 |
| S(Cc1ccc(OC)cc1)c1nc(ccc1)CNC(=O)C(C)c1cc(F)c(NS(=O)(=O)C)cc1)C(F)F           | 279.000 | CHEMBL2442923 |
| S(=O)(=O)(Nc1ccc(cc1F)C(C(=O)NCc1ccc(nc1N1CCC(OC)CC1)C(F)F)C)C                | 280.000 | CHEMBL2177408 |
| S(=O)(=O)(Nc1ccc(cc1F)C(C(=O)NCc1ccc(nc1N1CCC2(ON=C(C2)C(C)C)CC1)C(F)F)C)C    | 281.000 | CHEMBL2177416 |
| S(=O)(=O)(Nc1ccc(cc1F)C(C(=O)NCc1ccc(nc1N1CCC2(ON=C(C2)c2ccc2)CC1)C(F)F)C)C   | 289.000 | CHEMBL2177417 |
| S(=O)(=O)(Nc1ccc(cc1F)C(C(=O)NCc1ccc(nc1OC1CCN(CC1)C(OC(C)C)O)C(F)F)C)C       | 293.000 | CHEMBL2385244 |
| S(=O)(=O)(Nc1ccc(cc1F)C(C(=O)NCc1ccc(nc1NCCCC)C(F)F)C)C                       | 293.000 | CHEMBL2178076 |
| FC(F)(F)c1ccnc1-c1cc2nccc(Nc3ccc(cc3)C(F)F)2nc1                               | 308.000 | CHEMBL1089117 |
| S(CCCN1CCCC1)c1nc(ccc1)CNC(=O)C(C)c1cc(F)c(NS(=O)(=O)C)cc1)C(F)F              | 312.000 | CHEMBL2442903 |
| S(=O)(=O)(Nc1ccc(cc1F)C(C(=O)NCc1ccc(nc1OCc1ccc(cc1)CCCC)C(F)F)C)C            | 337.000 | CHEMBL2385227 |

|                                                                                         |         |               |
|-----------------------------------------------------------------------------------------|---------|---------------|
| S(=O)(=O)(Nc1ccc(cc1F)C(C(=O)NCc1ccc(nc1OCC1CCN(CC1)C(OC(C)(C)C)=O)C(F)(F)F)C)C         | 342.000 | CHEMBL2385219 |
| FC(F)(F)c1ccenc1N1CCc2c(nc(nc2Nc2ccc(cc2)C(O)(C)C)N2CCCC2)CC1                           | 361.000 | CHEMBL1290705 |
| FC(F)(F)c1ccenc1N1CCc2c(nc(nc2Nc2ccc(cc2)C(F)(F)F)N2CCN(CC2)C)CC1                       | 367.000 | CHEMBL1630296 |
| FC(F)(F)c1ccenc1-c1cc2nc(nc(Nc3ccc(nc3)C(F)(F)F)c2cc1)CCCCO                             | 380.000 | CHEMBL456962  |
| O(CC(=O)Nc1ccc(nc1)N1CCCC1)c1ccc(cc1)C(C)(C)C                                           | 411.000 | CHEMBL2380431 |
| Clc1ccc(cc1)CNc1nc(ccc1CNC(=O)C(C)C)c1cc(F)c(NS(=O)(=O)C)cc1)C(F)(F)F                   | 414.000 | CHEMBL2178085 |
| s1c2c(nc1CO)cc(NC(=O)c1ccc(nc1)C(F)(F)F)cc2                                             | 417.200 | CHEMBL2088404 |
| S(=O)(=O)(Nc1ccc(cc1F)C(C(=O)NCc1ccc(nc1N1CCC(CC1)CN(C)C)C(F)(F)F)C)C                   | 426.000 | CHEMBL2177415 |
| S(=O)(=O)(N)c1ccenc1N1CCc2c(nc(nc2Nc2ccc(cc2)C(F)(F)F)N2CCCC2)CC1                       | 449.000 | CHEMBL1290373 |
| FC(F)(F)c1ccenc1-c1nc2c(cc1)c(Nc1ccc(cc1)C(F)(F)F)cnc2                                  | 460.000 | CHEMBL1092545 |
| Clc1ccc(nc1N1CCc2c(nc(nc2Nc2ccc(cc2)C(F)(F)F)N2CCCC2)CC1)C(O)=O                         | 462.000 | CHEMBL1290480 |
| S(=O)(=O)(Nc1ccc(cc1F)C(C(=O)NCc1ccc(nc1OCCOCC)C(F)(F)F)C)C                             | 462.000 | CHEMBL2385405 |
| FC(F)(F)c1ccenc1N1CCc2c(nc(nc2Nc2ccc(cc2)C(F)(F)F)Nc2ccc2)CC1                           | 476.000 | CHEMBL1631259 |
| S(=O)(=O)(Nc1ccc(cc1F)C(C(=O)NCc1ccc(nc1N1CCC(Nc2ccc2)CC1)C(F)(F)F)C)C                  | 480.000 | CHEMBL2177108 |
| Clc1ccenc1N1CCN(CC1)C(Oc1ccc(cc1)C(C)(C)C)=O                                            | 480.000 | CHEMBL1080805 |
| FC(F)(F)c1ccenc1N1CCc2c(nc(nc2Nc2ccc(cc2)C(F)(F)F)N2CCN(CC2)C)CO)CC1                    | 498.000 | CHEMBL1630618 |
| FC(F)(F)c1nc(ccc1)-c1n2c(cc1C(=O)N(CCO)CC)C=CC=C2                                       | 501.190 | CHEMBL2164885 |
| O(CC(=O)Nc1ccc(nc1)N1CC(O)CC1)c1ccc(cc1)C(C)(C)C                                        | 516.000 | CHEMBL2380432 |
| FC(F)(F)c1ccenc1N1CCc2c(nc(nc2Nc2ccc(cc2)C(C)(C)C)C)C)C)C1                              | 520.000 | CHEMBL1290370 |
| FC(F)(F)c1ccenc1N1CCc2c(nc(nc2Cc2ccc(cc2)C(C#N)(C)C)C)C)C)CC1                           | 580.000 | CHEMBL1289037 |
| O(CC(=O)Nc1ccc(nc1)N(C)C)c1ccc(cc1)C(C)(C)C                                             | 583.000 | CHEMBL2380434 |
| [nH]1c2ccc(ccc2nc1N1CCN(C[C@H]1)C)c1nccc1C(C)(C)C                                       | 597.000 | CHEMBL403013  |
| FC(F)(F)c1c1nccc1C(O)=O)-c1nc2ccc(Nc3ccc(cc3)C(F)(F)F)c2cc1                             | 607.000 | CHEMBL1214340 |
| S(=O)(=O)(Nc1ccc(cc1F)C(C(=O)NCc1ccc(nc1N1CCC(OCC)CC1)C(F)(F)F)C)C                      | 612.000 | CHEMBL2177409 |
| Clc1ccenc1N1CCC(=CC1)C(=O)Nc1ccc(Cl)cc1F                                                | 618.000 | CHEMBL522969  |
| Clc1cccc1CSc1nc(ccc1CNC(=O)C(C)C)c1cc(F)c(NS(=O)(=O)C)cc1)C(F)(F)F                      | 620.000 | CHEMBL2442924 |
| S(=O)(=O)(Nc1ccc(cc1F)C(C(=O)NCc1ccc(nc1N1CCN(CC1)Cc1cccc1)C(F)(F)F)C)C                 | 634.000 | CHEMBL2177399 |
| S(=O)(=O)(Nc1ccc(cc1F)C(C(=O)NCc1ccc(nc1OCc1ccc(OC)cc1)C(F)(F)F)C)C                     | 653.000 | CHEMBL2385232 |
| FC(F)(F)c1ccenc1-c1nc2nenc(Nc3ccc(cc3)C(F)(F)F)c2en1                                    | 665.000 | CHEMBL1093131 |
| Clc1ccc(cc1)CSc1nc(ccc1CNC(=O)C(C)C)c1cc(F)c(NS(=O)(=O)C)cc1)C(F)(F)F                   | 674.000 | CHEMBL2442921 |
| S(CCCCC)c1nc(ccc1CNC(=O)C(C)C)c1cc(F)c(NS(=O)(=O)C)cc1)C(F)(F)F                         | 719.000 | CHEMBL2442896 |
| S(=O)(=O)(Nc1ccc(cc1F)[C@@H](C(=O)NCc1ccc(nc1N1C[C@@H](NC(OC(C)(C)C)=O)CC1)C(F)(F)F)C)C | 737.000 | CHEMBL2177421 |
| S(=O)(=O)(Nc1ccc(cc1F)[C@@H](C(=O)NCc1ccc(nc1N1C[C@@H](NC(OC(C)(C)C)=O)CC1)C(F)(F)F)C)C | 757.000 | CHEMBL2177420 |
| S(Cc1ccc(cc1)C)c1nc(ccc1CNC(=O)C(C)C)c1cc(F)c(NS(=O)(=O)C)cc1)C(F)(F)F                  | 764.000 | CHEMBL2442922 |

|                                                                                 |          |               |
|---------------------------------------------------------------------------------|----------|---------------|
| O(CC(=O)Ne1ccc(nc1)N(CCO)C)c1cccc1C(C)(C)C                                      | 796.000  | CHEMBL2380565 |
| Clc1ccnc1N1CCc2c(ncnc2Ne2ccc(cc2)C(F)(F)F)CC1                                   | 907.000  | CHEMBL1290035 |
| O(CC(=O)Ne1ccc(nc1)N(CCO)C)c1ccc(cc1N1CCCC1)C(C)(C)C                            | 941.000  | CHEMBL2380572 |
| S(=O)(=O)(Ne1ccc(cc1F)C(C(=O)NCc1ccc(nc1N1CCC(CC1)C(=O)c1ccc(F)cc1)C(F)(F)F)C)C | 990.000  | CHEMBL2177403 |
| O(C)c1cc2c(cc1)C(Cc1ccnc1)C(NC(=O)Ne1c3c(ccc1)encc3)CC2                         | 1000.000 | CHEMBL399535  |
| S(=O)(=O)(Ne1ccc(cc1F)C(C(=O)NCc1ccc(nc1OCC1CCNCC1)C(F)(F)F)C)C                 | 1000.000 | CHEMBL2385252 |
| S(=O)(=O)(Ne1ccc(cc1F)C(C(=O)NCc1ccc(nc1OC1CCNCC1)C(F)(F)F)C)C                  | 1000.000 | CHEMBL2385243 |
| S(=O)(=O)(Ne1ccc(cc1F)[C@H](C(=O)NCc1ccc(nc1OCCCC)C(F)(F)F)C)C                  | 1000.000 | CHEMBL2385253 |
| S(c1nc(ccc1CNC(=O)[C@@H](C)c1ccc(F)c(NS(=O)(=O)C)cc1)C(F)(F)F)C1CCCCC1          | 1000.000 | CHEMBL2442912 |
| FC(F)(F)c1ccnc1N1CCN(CC1)C(Oc1ccc(cc1)C(F)(F)F)=O                               | 1000.000 | CHEMBL1079559 |
| FC(F)(F)c1ccnc1N1CCc2c(ncnc2Ne2ccc(cc2)C(F)(F)F)N)CC1                           | 1058.000 | CHEMBL1289265 |
| S(=O)(=O)(Ne1ccc(cc1F)C(C(=O)NCc1ccc(nc1N1C[C@H](O[C@H](C1)C)C)C)C(F)(F)F)C)C   | 1090.000 | CHEMBL2177401 |
| S(CCC(OC)=O)c1nc(ccc1CNC(=O)C(C)c1cc(F)c(NS(=O)(=O)C)cc1)C(F)(F)F               | 1099.000 | CHEMBL2442908 |
| S(=O)(=O)(Ne1ccc(cc1F)C(C(=O)NCc1ccc(nc1N1CCC(CC1)C)C(F)(F)F)C)C                | 1130.000 | CHEMBL2178078 |
| S(=O)(=O)(Ne1ccc(cc1F)C(C(=O)NCc1ccc(nc1NCC1CCN(CC1)C(OC(C)C)C)=O)C(F)(F)F)C)C  | 1140.000 | CHEMBL2178079 |
| S(=O)(=O)(Ne1ccc(cc1F)C(C(=O)NCc1ccc(nc1Nc1cc(C)c(cc1)C)C(F)(F)F)C)C            | 1160.000 | CHEMBL2178082 |
| O(C)c1nc(ccc1)-c1n2c(cc1C(=O)N(CCO)CC)C=CC=C2                                   | 1258.930 | CHEMBL2164884 |
| Clc1c(c2NC(=O)C(=O)Ne2cc1Cl)C(CC)c1ncccc1                                       | 1400.000 | CHEMBL437587  |
| S(=O)(=O)(Ne1ccc(cc1F)C(C(=O)NCc1ccc(nc1Nc1ccccc1)C(F)(F)F)C)C                  | 1400.000 | CHEMBL2178080 |
| FC(F)(F)c1ccnc1N1CCc2c(ncnc2Ne2ccc(cc2)C(F)(F)F)C1                              | 1450.000 | CHEMBL1290254 |
| FC(F)(F)c1ccnc1N1CCc2c(ncnc2Ne2ccc(cc2)C(C(O)=O)(C)C(C)C)CC1                    | 1450.000 | CHEMBL1289385 |
| FC(F)(F)c1ccnc1-c1nc2ccc(Nc3nc(C(O)=O)c(en3)C(F)(F)F)c2cc1                      | 1450.000 | CHEMBL1214209 |
| S(CCC(C)C)c1nc(ccc1CNC(=O)C(C)c1cc(F)c(NS(=O)(=O)C)cc1)C(F)(F)F                 | 1498.000 | CHEMBL2442902 |
| FC(F)(F)c1ccnc1-c1cc2nc(nc(Nc3ccc(cc3)C(F)(F)F)c2cc1)CCC(O)=O                   | 1627.000 | CHEMBL464592  |
| FC(F)(F)c1ccnc1N1CCc2c(ncnc2Ne2ccc(cc2)C(F)(F)F)NCC2N(CCCC2)C)CC1               | 1756.000 | CHEMBL1630633 |
| FC(F)(F)c1ccnc1N1C[C@H](N(CC1)c1[nH]c2cc(ccc2n1)C(C)(C)C)C                      | 1778.000 | CHEMBL254984  |
| S(=O)(=O)(C)c1ccnc1N1CCc2c(ncnc2Ne2ccc(cc2)C(F)(F)F)C(C)CC1                     | 1940.000 | CHEMBL1290256 |
| FC(F)(F)c1ccnc1N1CCc2c(ncnc2Ne2ccc(cc2)C(F)(F)F)N2CCN(CC2)CCN(C)C)CC1           | 2000.000 | CHEMBL1630617 |
| FC(F)(F)c1ccnc1N1CCCc2c(ncnc2Ne2ccc(cc2)C(C)(C)C)C1                             | 2040.000 | CHEMBL1290703 |
| S(=O)(=O)(C)c1ccnc1N1CCc2c(ncnc2Ne2ccc(cc2)C(F)(F)F)CC1                         | 2330.000 | CHEMBL1290036 |
| S(=O)(=O)(Ne1ccc(cc1F)[C@H](C(=O)NCc1ccc(nc1N1CCC(CC1)c1ccccc1)C(F)(F)F)C)C     | 2350.000 | CHEMBL2177436 |
| FC(F)(F)c1ccc(Nc2nnc3c2CCN(CC3)c2ncccc2C(=O)N)cc1                               | 2360.000 | CHEMBL1290146 |
| S(=O)(=O)(Ne1ccc(cc1F)C(C(=O)NCc1ccc(nc1N(C)C)C)C(F)(F)F)C)C                    | 2390.000 | CHEMBL2178061 |
| FC(F)(F)c1ccnc1N1CCc2c(ncnc2Ne2nc(OC)c(cc2)C(F)(F)F)C(C)CC1                     | 2460.000 | CHEMBL1290372 |

|                                                                       |          |               |
|-----------------------------------------------------------------------|----------|---------------|
| FC(F)(F)c1ccc(ene1-e1nc2necc(Nc3ncc(cc3)C(F)(F)F)c2nc1)C(=O)N         | 2500.000 | CHEMBL1214402 |
| S(=O)(=O)(N(C)C)c1ccc(Nc2nc(nc3e2CCN(CC3)e2neccc2C(F)(F)F)C(C)C)cc1   | 2520.000 | CHEMBL1289713 |
| O(CC(=O)Nc1ccc(nc1)N(CCO)C)c1ccc(cc1)C(C)(C)C                         | 2620.000 | CHEMBL2380564 |
| FC(F)(F)c1cccnc1N1CCc2c(nc(nc2Ne2ccc(cc2)C(F)(F)F)N(CCN(C)C)C)CC1     | 2667.000 | CHEMBL1630619 |
| Clc1cccnc1N1CCC(=CC1)C(=O)Nc1ccc(Cl)cc1C(F)(F)F                       | 2746.000 | CHEMBL491226  |
| S(=O)(=O)(N)c1cccnc1N1CCc2c(nc(nc2Ne2ccc(cc2)C(F)(F)F)CC1             | 2780.000 | CHEMBL1290145 |
| FC(F)(F)c1cccnc1N1CCc2c(nc(nc2Ne2ccc(cc2)C(F)(F)F)N2CC(NC)CC2)CC1     | 2790.000 | CHEMBL1629722 |
| FC(F)(F)c1cccnc1-c1cc2nc(nc(Nc3ccc(nc3)C(F)(F)F)c2cc1)CCC(O)=O        | 3000.000 | CHEMBL515050  |
| FC(F)(F)c1cccnc1N1CCc2c(nc(nc2Ne2ccc(cc2)C(F)(F)F)N2CCCN(C2)C)CC1     | 3080.000 | CHEMBL1630627 |
| FC(F)(F)c1cccnc1N1CCc2c(nc(nc2Ne2ccc(cc2)C(F)(F)F)N(CCN(CCCC)C)C)CC1  | 3330.000 | CHEMBL1631258 |
| FC(F)(F)c1cccnc1N1CCc2c(nc(nc2Ne2ccc(cc2)C(F)(F)F)N2CCNCC2)CC1        | 3350.000 | CHEMBL1289932 |
| FC(F)(F)COc1ncc(cc1)C(=O)NCCc1c2cc(OC)ccc2[nH]c1                      | 3400.000 | CHEMBL252178  |
| FC(F)(F)c1cccnc1N1CCc2c(nc(nc2Ne2ccc(cc2)C(F)(F)F)N(C)C2CCCN(C2)CC1   | 3600.000 | CHEMBL1630629 |
| FC(F)(F)c1cccnc1N1CCc2c(nc(nc2Ne2ccc(cc2)C(F)(F)F)N2CC(N)CC2)CC1      | 3700.000 | CHEMBL1630621 |
| Clc1cccnc1N1CCN(CC1)C(Oc1ccc(cc1)C(F)(F)F)=O                          | 3900.000 | CHEMBL1080129 |
| O(C)c1cc2c([nH]cc2CCNC(=O)c2ccc(nc2)-c2ccccc2)cc1                     | 3940.000 | CHEMBL252177  |
| Clc1cc(ene1N1CCc2c(nc(nc2Ne2ccc(cc2)C(F)(F)F)C(C)C)CC1)C(O)=O         | 4220.000 | CHEMBL1290257 |
| Clc1ccc(OC(=O)N2CCN(CC2)c2neccc2C(F)(F)F)cc1                          | 4600.000 | CHEMBL1079737 |
| s1e2nenc(Nc3ccc(cc3)C(F)(F)F)c2nc1Nc1nccc1C(F)(F)F                    | 5000.000 | CHEMBL469093  |
| FC(F)(F)c1cccnc1N1CCc2c(nc(nc2Ne2ccc(cc2)C(F)(F)F)N2CCCN(C2)CC1       | 5000.000 | CHEMBL1630626 |
| FC(F)(F)c1cccnc1N1CCc2c(nc(nc2Ne2ccc(cc2)C(F)(F)F)N(C)C2CCCN(C2)C)CC1 | 5000.000 | CHEMBL1630630 |
| FC(F)(F)c1cccnc1N1CCc2c(nc(nc2Ne2nc(OC)c(cc2)C(F)(F)F)N2CCCCC2)CC1    | 6670.000 | CHEMBL1290479 |
| FC(F)(F)c1cc2c(cc1)C(NC(=O)Nc1c3c([nH]nc3)ccc1)CC2                    | 3.000    | CHEMBL254866  |
| O1c2c(cccc2C(C)(C)C)[C@H](NC(=O)Nc2c3c([nH]nc3)ccc2)CC1               | 3.000    | CHEMBL1684275 |
| FC(F)(F)c1cc2OCC[C@@H](NC(=O)Nc3c4c([nH]nc4)ccc3)c2cc1                | 4.000    | CHEMBL1684271 |
| FC(F)(F)c1ccc(CCC(C)(C)C)c(cc1)CNC(=O)Nc1c2c([nH]nc2)ccc1             | 4.300    | CHEMBL1086278 |
| FC(F)(F)c1c2OCCC(NC(=O)Nc3c4c([nH]nc4)ccc3)c2ccc1                     | 5.000    | CHEMBL1684253 |
| FC(F)(F)Oc1c2OCCC(NC(=O)Nc3c4c([nH]nc4)ccc3)c2ccc1                    | 5.000    | CHEMBL1684254 |
| O1c2c(cccc2C(C)(C)C)C(NC(=O)Nc2c3c([nH]nc3)ccc2)CC1                   | 5.000    | CHEMBL1684255 |
| FC(F)(F)c1ccc(CCC(F)(C)C)c(cc1)CNC(=O)Nc1c2c([nH]nc2)ccc1             | 6.000    | CHEMBL1086277 |
| O=C(NC1CCN(c2c1cccc2C(C)(C)C)C)Nc1c2c([nH]nc2)ccc1                    | 6.000    | CHEMBL1684262 |
| FC(F)(F)c1cc2N(CCC(NC(=O)Nc3c4c([nH]nc4)ccc3)c2cc1)C                  | 7.000    | CHEMBL254226  |
| FC(F)(F)c1ccc(CCC(C)(C)C)c(cc1)CNC(=O)Nc1c2c(nc2)C)ccc1               | 7.000    | CHEMBL1085324 |
| FC(F)(F)c1ccc(CCCOC)c(cc1)CNC(=O)Nc1c2c([nH]nc2)ccc1                  | 8.000    | CHEMBL1083713 |



|                                                                                   |        |               |
|-----------------------------------------------------------------------------------|--------|---------------|
| <chem>FC(F)(F)c1cc(CCe2ceccc2)c(cc1)CNC(=O)Nc1c2c([nH]nc2)ccc1</chem>             | 8.000  | CHEMBL1082460 |
| <chem>FC(F)(F)Oe1cc2OCCC(NC(=O)Nc3c4c([nH]nc4)ccc3)c2cc1</chem>                   | 8.000  | CHEMBL1684251 |
| <chem>FC(F)(F)c1cc(Oc2ceccc2)c(cc1)CNC(=O)Nc1c2c([nH]nc2)ccc1</chem>              | 9.000  | CHEMBL1082461 |
| <chem>FC(F)(F)c1cc(C(C)C)c(cc1)CNC(=O)Nc1c2c([nH]nc2)ccc1</chem>                  | 9.000  | CHEMBL1086276 |
| <chem>O=C(Nc1c2c([nH]nc2)ccc1)NCc1ccc(N2[C@H]3CCCC[C@@H]2CC3)cc1CCC(C)(C)C</chem> | 10.300 | CHEMBL231535  |
| <chem>FC(F)(F)c1cc2OCCC(NC(=O)Nc3c4c([nH]nc4)ccc3)c2cc1</chem>                    | 11.000 | CHEMBL254225  |
| <chem>Clc1c2N(CCC(NC(=O)Nc3c4c([nH]nc4)ccc3)c2ccc1)CCC(C)C</chem>                 | 11.000 | CHEMBL1684270 |
| <chem>Fc1cc(cc(F)c1N1[C@H]2CCC[C@@H]1CC2)CNC(=O)Nc1c2c([nH]nc2)ccc1</chem>        | 12.600 | CHEMBL395262  |
| <chem>O=C(Nc1c2c([nH]nc2)ccc1)N[C@@H]1CCc2cc(N3CCCCC3)ccc12</chem>                | 14.000 | CHEMBL520995  |
| <chem>Fc1cc(ccc1N1CCCCC1)CNC(=O)Nc1c2c([nH]nc2)ccc1</chem>                        | 14.200 | CHEMBL231422  |
| <chem>Fc1cc(ccc1N1[C@H]2CCC[C@@H]1CC2)CNC(=O)Nc1c2c([nH]nc2)ccc1</chem>           | 14.800 | CHEMBL231227  |
| <chem>O1c2c(cccc2C2CCCC2)C(NC(=O)Nc2c3c([nH]nc3)ccc2)CC1</chem>                   | 15.000 | CHEMBL1684249 |
| <chem>FC(F)(F)c1cc(CCC(C)(C)C)c(cc1)CNC(=O)Nc1c2c(n(nc2)C)ccc1</chem>             | 15.000 | CHEMBL1085324 |
| <chem>O1c2c(cccc2N2CCCC2)C(NC(=O)Nc2c3c([nH]nc3)ccc2)CC1</chem>                   | 16.000 | CHEMBL1684256 |
| <chem>O=C(Nc1c2c([nH]nc2)ccc1)NCc1ccc(N2[C@H]3CCCC[C@@H]2CC3)cc1</chem>           | 18.000 | CHEMBL231519  |
| <chem>O1c2c(cccc2C(C)(C)C)[C@@H](NC(=O)Nc2c3c([nH]nc3)ccc2)CC1</chem>             | 19.000 | CHEMBL1684276 |
| <chem>O=C(Nc1c2c(n(nc2)C)ccc1)NCc1ccc(N2[C@H]3CCCC[C@@H]2CC3)cc1Cc1ccccc1</chem>  | 19.000 | CHEMBL231437  |
| <chem>O=C(Nc1c2c([nH]nc2)ccc1)NCc1cc(C)c(N2[C@H]3CCCC[C@@H]2CC3)cc1</chem>        | 19.800 | CHEMBL231436  |
| <chem>Clc1cc(ccc1N1[C@H]2CCC[C@@H]1CC2)CNC(=O)Nc1c2c([nH]nc2)ccc1</chem>          | 20.400 | CHEMBL396960  |
| <chem>Fc1cc(N2[C@H]3CCCC[C@@H]2CC3)c(F)cc1CNC(=O)Nc1c2c([nH]nc2)ccc1</chem>       | 21.300 | CHEMBL230919  |
| <chem>O=C(Nc1c2c([nH]nc2)ccc1)NCc1ccc(N2[C@H]3CCCC[C@@H]2CC3)cc1Cc1ccccc1</chem>  | 22.400 | CHEMBL437165  |
| <chem>Fc1c(F)c(N2[C@H]3CCCC[C@@H]2CC3)ccc1CNC(=O)Nc1c2c([nH]nc2)ccc1</chem>       | 25.500 | CHEMBL437195  |
| <chem>FC(F)(F)c1cc(ccc1N1[C@H]2CCC[C@@H]1CC2)CNC(=O)Nc1c2c([nH]nc2)ccc1</chem>    | 26.900 | CHEMBL231225  |
| <chem>O=C(Nc1c2c([nH]nc2)ccc1)NCc1ccc(N2[C@H]3CCCC[C@@H]2CC3)cc1C</chem>          | 29.000 | CHEMBL438656  |
| <chem>FC(F)(F)c1cc(ccc1N1CCCCC1)CNC(=O)Nc1c2c([nH]nc2)ccc1</chem>                 | 29.500 | CHEMBL388032  |
| <chem>O1CC[C@@H](NC(=O)Nc2c3c([nH]nc3)ccc2)c2c1cc(cc2)C(C)C</chem>                | 31.000 | CHEMBL1684273 |
| <chem>Fc1cc2N(CCC(NC(=O)Nc3c4c([nH]nc4)ccc3)c2cc1)C</chem>                        | 34.000 | CHEMBL1684261 |
| <chem>O=C(Nc1c2c([nH]nc2)ccc1)NCc1ccc(N2[C@H]3CCCC[C@@H]2CC3)cc1C(C)C</chem>      | 35.300 | CHEMBL231438  |
| <chem>Fc1cc(cc(F)c1N1CCCCC1)CNC(=O)Nc1c2c([nH]nc2)ccc1</chem>                     | 39.300 | CHEMBL396713  |
| <chem>FC(F)(F)c1ccc(cc1)[C@H](NC(=O)Nc1c2c([nH]nc2)ccc1)C</chem>                  | 41.000 | CHEMBL231291  |
| <chem>O1CCC(NC(=O)Nc2c3c([nH]nc3)ccc2)c2c1cc(cc2)C(C)(C)C</chem>                  | 43.000 | CHEMBL1684252 |
| <chem>FC(F)(F)c1cc2OCCC[C@H](NC(=O)Nc3c4c([nH]nc4)ccc3)c2cc1</chem>               | 43.000 | CHEMBL1684272 |
| <chem>Brc1cc(ccc1N1[C@H]2CCC[C@@H]1CC2)CNC(=O)Nc1c2c([nH]nc2)ccc1</chem>          | 43.200 | CHEMBL231226  |
| <chem>FC(F)(F)c1ccc(cc1)C(NC(=O)Nc1c2c([nH]nc2)ccc1)C</chem>                      | 47.000 | CHEMBL397922  |

|                                                                       |          |               |
|-----------------------------------------------------------------------|----------|---------------|
| FC(F)(F)c1cc(CCC(C)(C)C)c(cc1)CNC(=O)Nc1c2c(n(nc2)CC)ccc1             | 53.000   | CHEMBL1085067 |
| FC(F)(F)c1cc(N2[C@H]3CCC[C@@H]2CC3)ccc1CNC(=O)Nc1c2c([nH]nc2)ccc1     | 54.500   | CHEMBL231520  |
| Clc1cc(N2[C@H]3CCC[C@@H]2CC3)ccc1CNC(=O)Nc1c2c([nH]nc2)ccc1           | 58.800   | CHEMBL396714  |
| Fc1cc2c(N(CCC2NC(=O)Nc2c3c([nH]nc3)ccc2)Cc2cccc2)cc1                  | 66.000   | CHEMBL1684266 |
| FC(F)(F)c1cc(CCC(C)(C)C)c(cc1)CNC(=O)Nc1c2c(n(nc2)C(C)C)ccc1          | 69.000   | CHEMBL1085068 |
| O=C(NC1CCN(c2c1cccc2)Cc1cccc1)Nc1c2c([nH]nc2)ccc1                     | 70.000   | CHEMBL1684265 |
| O=C(Nc1c2c([nH]nc2)ccc1)N[C@H](C)c1ccc(cc1)C                          | 73.000   | CHEMBL397459  |
| Fc1cc(N2[C@H]3CC4(OCCO4)C[C@@H]2CC3)c(F)cc1CNC(=O)Nc1c2c([nH]nc2)ccc1 | 82.000   | CHEMBL231019  |
| FC(F)(F)c1ccc(cc1)-c1oc(nc1)Nc1c2c([nH]nc2)ccc1                       | 101.000  | CHEMBL1173746 |
| O1c2c(cccc2N2CCOCC2)C(NC(=O)Nc2c3c([nH]nc3)ccc2)CC1                   | 110.000  | CHEMBL1684250 |
| O=C(NC1CCN(c2c1ccc(c2)C(C)(C)C)Nc1c2c([nH]nc2)ccc1                    | 115.000  | CHEMBL1684263 |
| O=C(NC1CCN(c2c1cc(cc2)C(C)(C)C)Cc1cccc1)Nc1c2c([nH]nc2)ccc1           | 121.000  | CHEMBL1684267 |
| O=C(Nc1c2c([nH]nc2)ccc1)N[C@H](C)c1c2c(ccc1)cccc2                     | 123.000  | CHEMBL396018  |
| FC(F)(F)c1cc(N2CCCCC2)ccc1CNC(=O)Nc1c2c([nH]nc2)ccc1                  | 133.000  | CHEMBL230485  |
| Fc1cc(N2[C@H]3CC(=O)C[C@@H]2CC3)c(F)cc1CNC(=O)Nc1c2c([nH]nc2)ccc1     | 157.000  | CHEMBL231020  |
| O(C)c1cc2c(N(CCC2NC(=O)Nc2c3c([nH]nc3)ccc2)Cc2cccc2)cc1               | 160.000  | CHEMBL1684268 |
| Clc1cc(N2CCCCC2)ccc1CNC(=O)Nc1c2c([nH]nc2)ccc1                        | 190.000  | CHEMBL230380  |
| O(C)c1cc2c(N(CCC2NC(=O)Nc2c3c([nH]nc3)ccc2)CC2CCCC2)cc1               | 196.000  | CHEMBL1684269 |
| O=C(NC1CCN(c2c1cccc2)C)Nc1c2c([nH]nc2)ccc1                            | 215.000  | CHEMBL1684260 |
| O1CCC(NC(=O)Nc2c3c([nH]nc3)ccc2)c2c1cccc2                             | 234.000  | CHEMBL1684259 |
| FC(F)(F)c1ccc(cc1)[C@@H](NC(=O)Nc1c2c([nH]nc2)ccc1)C                  | 248.000  | CHEMBL395995  |
| O=C(Nc1c2c([nH]nc2)ccc1)NCc1cc2CCN(c2cc1)CC                           | 285.000  | CHEMBL388870  |
| O=C(Nc1c2c(n(nc2)C)ccc1)NCc1cc2CCN(c2cc1)CC                           | 305.000  | CHEMBL231238  |
| Fc1cc2c(OCCC2NC(=O)Nc2c3c([nH]nc3)ccc2)cc1                            | 718.000  | CHEMBL1684258 |
| O=C(Nc1c2c([nH]nc2)ccc1)N[C@@H](C)c1ccc(cc1)C                         | 749.000  | CHEMBL231392  |
| O=C(NC1CCN(c2c1cc(cc2)C(C)(C)C)Nc1c2c([nH]nc2)ccc1                    | 853.000  | CHEMBL1684248 |
| O=C(Nc1c2c([nH]nc2)ccc1)NCc1cc2c3c(n(cc21)C)cccc3                     | 902.000  | CHEMBL388871  |
| O1CCC(NC(=O)Nc2c3c([nH]nc3)ccc2)c2cc(ccc12)C                          | 933.000  | CHEMBL1684257 |
| O1CC[C@H](NC(=O)Nc2c3c([nH]nc3)ccc2)c2c1cc(cc2)C(C)(C)C               | 1200.000 | CHEMBL1684274 |
| O(C)c1cc2c(N(CCC2NC(=O)Nc2c3c([nH]nc3)ccc2)C)cc1                      | 1380.000 | CHEMBL1684264 |
| O=C(Nc1c2c(n(nc2)C)ccc1)NCc1cc2c(n(cc2)C)cc1                          | 1850.000 | CHEMBL442070  |
| O=C(Nc1c2c([nH]nc2)ccc1)N[C@@H](C)c1c2c(ccc1)cccc2                    | 3750.000 | CHEMBL231593  |
| FC(F)(F)c1ccc(cc1)CC1c2c(cc(OC)cc2)CCC1NC(=O)Nc1c2c(ccc1)cncc2        | 2.000    | CHEMBL436638  |
| FC(F)(F)c1ccc(cc1)CNC(=O)Nc1c2c(ccc1)cncc2                            | 2.000    | CHEMBL104028  |

|                                                               |        |              |
|---------------------------------------------------------------|--------|--------------|
| FC(F)(F)c1ccc(cc1)CNC(=O)Nc1c2c(ccc1)ence2                    | 2.100  | CHEMBL104028 |
| Fe1cc(ccc1N1CCCCC1)CNC(=O)Nc1c2c(ccc1)ence2                   | 2.800  | CHEMBL231518 |
| O=C(Nc1c2c(ccc1)ence2)NCc1ccc(N2[C@H]3CCC[C@H]2CC3)cc1        | 3.300  | CHEMBL231206 |
| O=C(Nc1c2c(ccc1)ence2)NCc1ccc(N2CCCCC2)cc1                    | 3.300  | CHEMBL387996 |
| O=C(Nc1c2c(ccc1)ence2)NCc1ccc(N2CCCCC2)cc1                    | 3.800  | CHEMBL427266 |
| FC(F)(F)c1ccc(cc1)CNC(=O)Nc1c2c(ccc1)ence2                    | 4.000  | CHEMBL104028 |
| FC(F)(F)c1ccc(ccc1N1CCCCC1)CNC(=O)Nc1c2c(ccc1)ence2           | 4.600  | CHEMBL397272 |
| O=C(Nc1c2c(ccc1)ence2)NCc1ccc(N2CCCCC2)cc1                    | 4.700  | CHEMBL230998 |
| Fe1ccc(cc1)C(Cc1cccc1)CNC(=O)Nc1c2c(ccc1)ence2                | 5.000  | CHEMBL250370 |
| FC(F)(F)c1ccc(cc1)CNC(=O)Nc1c2c(ccc1)ence2                    | 5.000  | CHEMBL104028 |
| Clc1cc(N2CCCCC2)ccc1CNC(=O)Nc1c2c(ccc1)ence2                  | 5.200  | CHEMBL427111 |
| O=C(Nc1c2c(ccc1)ence2)NCc1ccc(N2CCCCC2)cc1                    | 5.300  | CHEMBL230896 |
| FC(F)(F)c1ccc(N2CCCCC2)ccc1CNC(=O)Nc1c2c(ccc1)ence2           | 5.700  | CHEMBL231517 |
| O=C(Nc1c2c(ccc1)ence2)NCc1ccc(N2CCCCC2)cc1                    | 7.300  | CHEMBL230997 |
| Fe1cc(cc(F)c1N1CCOCC1)CNC(=O)Nc1c2c(ccc1)ence2                | 9.300  | CHEMBL231619 |
| O=C(Nc1c2c(ccc1)ence2)NCc1ccc(N2CCC(CC2)C)cc1                 | 9.300  | CHEMBL231104 |
| O=C(Nc1c2c(ccc1)N)NCc1ccc(N2CCCCC2)cc1                        | 9.800  | CHEMBL387579 |
| Fe1c2c(cc1)C(Cc1ccc(cc1)C(F)(F)C(NC(=O)Nc1c3c(ccc1)ence3)CC2  | 10.000 | CHEMBL250594 |
| Fe1c2c(cc1)C(Cc1cccc1)C(NC(=O)Nc1c3c(ccc1)ence3)CC2           | 12.000 | CHEMBL250557 |
| Clc1cc(ccc1)CC1c2c(cc(OC)cc2)CCC1NC(=O)Nc1c2c(ccc1)ence2      | 13.000 | CHEMBL400312 |
| O(C)c1ccc(cc1)C(Cc1cccc1)CNC(=O)Nc1c2c(ccc1)ence2             | 14.000 | CHEMBL250368 |
| FC(F)(F)c1ccc(ccc1N1[C@H]2CCC[C@H]1CC2)CNC(=O)Nc1c2c(ccc1)N   | 14.000 | CHEMBL439007 |
| Fe1cc(ccc1N1CCCC1)CNC(=O)Nc1c2c(ccc1)C                        | 15.500 | CHEMBL397273 |
| Clc1c2c(ccc1)C(Cc1cccc1)C(NC(=O)Nc1c3c(ccc1)ence3)CC2         | 16.000 | CHEMBL400069 |
| Bre1cc2c(cc1)C(Cc1cccc1)C(NC(=O)Nc1c3c(ccc1)ence3)CC2         | 17.000 | CHEMBL250558 |
| O=C(Nc1c2c(ccc1)ence2)NC(C)c1ccc(cc1C(C)C(C)C(C)C             | 17.000 | CHEMBL230669 |
| Fe1ccc(cc1)C(Cc1ccc(cc1)C(F)(F)CNC(=O)Nc1c2c(ccc1)ence2       | 19.000 | CHEMBL250983 |
| Fe1cc(ccc1C(F)(F)C(NC(=O)Nc1c2c(ccc1)ence2)C                  | 19.000 | CHEMBL230561 |
| O=C(NC1CCc2c(ccc2)C1Cc1cccc1)Nc1c2c(ccc1)ence2                | 20.000 | CHEMBL249946 |
| O=C(Nc1c2c(ccc1)ence2)NC(C)c1ccc(cc1CC)C(C)C(C)C              | 20.000 | CHEMBL230668 |
| O(C)c1cc2c(cc1)C(Cc1ccc(cc1)C#N)C(NC(=O)Nc1c3c(ccc1)ence3)CC2 | 21.000 | CHEMBL399277 |
| Bre1ccc(cc1)CC1c2c(cc(OC)cc2)CCC1NC(=O)Nc1c2c(ccc1)ence2      | 22.000 | CHEMBL250593 |
| FC(F)(F)c1ccc(cc1)C(NC(=O)Nc1c2c(ccc1)ence2)C                 | 22.000 | CHEMBL389715 |
| S1CCN(CC1)c1ccc(cc1)CNC(=O)Nc1c2c(ccc1)ence2                  | 23.800 | CHEMBL231106 |

|                                                            |          |               |
|------------------------------------------------------------|----------|---------------|
| O=C(Nc1c2c(ccc1)encc2)NC(C)c1ccc(cc1)C(C)(C)C              | 24.000   | CHEMBL230457  |
| O(C)c1cc2c(cc1)C(Cc1cccc1)C(NC(=O)Nc1c3c(ccc1)encc3)CC2    | 25.000   | CHEMBL250149  |
| BrC1ccc(cc1)C(NC(=O)Nc1c2c(ccc1)encc2)C                    | 26.000   | CHEMBL427105  |
| O(C)c1ccc(cc1)CC1c2c(cc(OC)cc2)CCC1NC(=O)Nc1c2c(ccc1)encc2 | 36.000   | CHEMBL248762  |
| O=C(Nc1c2c(ccc1)encc2)NC(C)c1ccc(cc1)C(C)(C)C              | 46.000   | CHEMBL230667  |
| Clc1cc2c(cc1)C(Cc1cccc1)C(NC(=O)Nc1c3c(ccc1)encc3)CC2      | 63.000   | CHEMBL250761  |
| Fe1cc2c(cc1)C(Cc1ccoc1)C(NC(=O)Nc1c3c(ccc1)encc3)CC2       | 83.000   | CHEMBL428057  |
| Clc1cc2c(CCC(NC(=O)Nc3c4c(ccc3)encc4)C2Cc2cccc2)cc1        | 86.000   | CHEMBL250762  |
| O1CCN(CC1)c1ccc(cc1)CNC(=O)Nc1c2c(ccc1)encc2               | 91.000   | CHEMBL231105  |
| FC(F)(F)c1ccc(cc1)C(NC(=O)Nc1c2c(ccc1)encc2)(C)C           | 94.000   | CHEMBL230983  |
| Fe1cc2c(cc1)C(CC=C)C(NC(=O)Nc1c3c(ccc1)encc3)CC2           | 100.000  | CHEMBL251182  |
| Fe1cc(ccc1C(F)(F)F)C(NC(=O)Nc1c2c(ccc1)encc2)CC            | 109.000  | CHEMBL397898  |
| O=C(Nc1c2c(ccc1)encc2)NC(c1ccc(cc1)C(C)(C)C)c1cccc1        | 125.000  | CHEMBL397896  |
| s1cccc1CC1c2c(cc(F)cc2)CCC1NC(=O)Nc1c2c(ccc1)encc2         | 140.000  | CHEMBL251181  |
| Clc1ccc(cc1)C(NC(=O)Nc1c2c(ccc1)encc2)(C)C                 | 143.000  | CHEMBL230982  |
| FC(F)(F)c1ccc(cc1)C(NC(=O)Nc1c2c(ccc1)encc2)c1cccc1        | 147.000  | CHEMBL230562  |
| FC(F)(F)c1ccc(cc1)C(NC(=O)Nc1c2c(ccc1)encc2)C1CC1          | 149.000  | CHEMBL230774  |
| Clc1ccc2c(c1)c(NC(=O)NCc1ccc(N3CCOCC3)cc1)ccc2             | 156.000  | CHEMBL230689  |
| O=C(Nc1c2c(ccc1)encc2)NCc1ccc(N(C)C)cc1                    | 157.000  | CHEMBL387995  |
| O=C(Nc1c2c(ccc1)encc2)NC(c1ccc(N2CCCC2)cc1)c1cccc1         | 171.000  | CHEMBL230563  |
| Oc1cc2c(cc1)C(Cc1cccc1)C(NC(=O)Nc1c3c(ccc1)encc3)CC2       | 200.000  | CHEMBL248761  |
| FC(F)(F)c1ccc(cc1)-c1oc(nc1)Nc1c2c(ccc1)encc2              | 229.000  | CHEMBL1173681 |
| O(C)c1cc2c(cc1OC)CCC(NC(=O)Nc1c3c(ccc1)encc3)C2Cc1cccc1    | 230.000  | CHEMBL251582  |
| O1C(CN(CC1C)c1ccc(cc1)CNC(=O)Nc1c2c(ccc1)encc2)C           | 258.000  | CHEMBL387578  |
| FC(F)(F)c1ccc(cc1)C(NC(=O)Nc1c2c(ccc1)encc2)C1CCCC1        | 287.000  | CHEMBL230881  |
| Fe1cc2c(cc1)C(CC1CC1)C(NC(=O)Nc1c3c(ccc1)encc3)CC2         | 350.000  | CHEMBL248561  |
| FC(F)(F)c1ccc(cc1)C(NC(=O)Nc1c2c(ccc1)encc2)C1CCCC1        | 476.000  | CHEMBL395720  |
| O=C(Nc1c2c(ccc1)encc2)NC(c1cccc1)c1cccc1                   | 600.000  | CHEMBL397897  |
| O(C)c1ccc(cc1)C(CNC(=O)Nc1c2c(ccc1)encc2)C                 | 680.000  | CHEMBL249943  |
| Clc1cc2c(cc1)C(CC#N)C(NC(=O)Nc1c3c(ccc1)encc3)CC2          | 1000.000 | CHEMBL399987  |
| O=C(Nc1c2c(ccc1)encc2)NC(CC)c1cccc1                        | 2580.000 | CHEMBL230772  |
| FC(F)(F)Oe1ccc(cc1)C(=O)NCCc1c2c(ccc1)encc2                | 6700.000 | CHEMBL398540  |
| Fe1cc(ccc1N1Cc2c(C1)cccc2)CNC(=O)Nc1c2c(ccc1)encc2         | 7360.000 | CHEMBL230379  |

**Table S3.** The C $\alpha$  rmsd of the four monomers (or units) in hTRPV1 bound with AMG9810.

|   | A    | B     | C     | D     |
|---|------|-------|-------|-------|
| A | ---- | 4.37  | 3.79  | 4.28  |
| B | 4.37 | ----  | 4.26  | 4.361 |
| C | 3.79 | 4.26  | ----  | 2.853 |
| D | 4.28 | 4.361 | 2.853 | ----  |

**Table S4.** The C $\alpha$  rmsd of the four monomers (or units) in hTRPV1 bound with RTX.

|   | A     | B     | C     | D     |
|---|-------|-------|-------|-------|
| A | ----  | 4.835 | 4.423 | 6.554 |
| B | 4.835 | ----  | 5.341 | 4.979 |
| C | 4.423 | 5.341 | ----  | 4.962 |
| D | 6.554 | 4.979 | 4.962 | ----  |

### 3D coordinates of hTRPV1 in the present work:

```
ATOM 1 N LEU A 112 53.798 -38.802 -73.817 1.00 0.00 A N
ATOM 2 CA LEU A 112 53.730 -37.474 -74.438 1.00 0.00 A C
ATOM 3 CB LEU A 112 53.269 -37.608 -75.899 1.00 0.00 A C
ATOM 4 CG LEU A 112 54.222 -38.453 -76.772 1.00 0.00 A C
ATOM 5 CD1 LEU A 112 53.745 -38.518 -78.233 1.00 0.00 A C
ATOM 6 CD2 LEU A 112 55.674 -37.973 -76.642 1.00 0.00 A C
ATOM 7 C LEU A 112 52.726 -36.646 -73.712 1.00 0.00 A C
ATOM 8 O LEU A 112 52.588 -35.452 -73.970 1.00 0.00 A O
ATOM 9 N TYR A 113 51.986 -37.272 -72.774 1.00 0.00 A N
ATOM 10 CA TYR A 113 50.974 -36.528 -72.088 1.00 0.00 A C
ATOM 11 CB TYR A 113 49.549 -36.964 -72.469 1.00 0.00 A C
ATOM 12 CG TYR A 113 49.285 -36.574 -73.880 1.00 0.00 A C
ATOM 13 CD1 TYR A 113 49.807 -37.307 -74.918 1.00 0.00 A C
ATOM 14 CE1 TYR A 113 49.555 -36.945 -76.220 1.00 0.00 A C
ATOM 15 CZ TYR A 113 48.773 -35.846 -76.489 1.00 0.00 A C
ATOM 16 OH TYR A 113 48.513 -35.470 -77.823 1.00 0.00 A O
ATOM 17 CD2 TYR A 113 48.500 -35.478 -74.159 1.00 0.00 A C
ATOM 18 CE2 TYR A 113 48.243 -35.111 -75.458 1.00 0.00 A C
```

|      |    |     |     |   |     |        |         |         |      |      |   |   |
|------|----|-----|-----|---|-----|--------|---------|---------|------|------|---|---|
| ATOM | 19 | C   | TYR | A | 113 | 51.071 | -36.751 | -70.616 | 1.00 | 0.00 | A | C |
| ATOM | 20 | O   | TYR | A | 113 | 51.152 | -37.886 | -70.148 | 1.00 | 0.00 | A | O |
| ATOM | 21 | N   | ASP | A | 114 | 51.089 | -35.642 | -69.852 | 1.00 | 0.00 | A | N |
| ATOM | 22 | CA  | ASP | A | 114 | 50.984 | -35.696 | -68.426 | 1.00 | 0.00 | A | C |
| ATOM | 23 | CB  | ASP | A | 114 | 52.037 | -34.841 | -67.700 | 1.00 | 0.00 | A | C |
| ATOM | 24 | CG  | ASP | A | 114 | 51.924 | -33.411 | -68.194 | 1.00 | 0.00 | A | C |
| ATOM | 25 | OD1 | ASP | A | 114 | 52.110 | -33.196 | -69.425 | 1.00 | 0.00 | A | O |
| ATOM | 26 | OD2 | ASP | A | 114 | 51.666 | -32.511 | -67.354 | 1.00 | 0.00 | A | O |
| ATOM | 27 | C   | ASP | A | 114 | 49.597 | -35.221 | -68.094 | 1.00 | 0.00 | A | C |
| ATOM | 28 | O   | ASP | A | 114 | 48.847 | -34.814 | -68.979 | 1.00 | 0.00 | A | O |
| ATOM | 29 | N   | ARG | A | 115 | 49.210 | -35.259 | -66.805 | 1.00 | 0.00 | A | N |
| ATOM | 30 | CA  | ARG | A | 115 | 47.879 | -34.864 | -66.426 | 1.00 | 0.00 | A | C |
| ATOM | 31 | CB  | ARG | A | 115 | 47.626 | -35.044 | -64.919 | 1.00 | 0.00 | A | C |
| ATOM | 32 | CG  | ARG | A | 115 | 46.224 | -34.641 | -64.456 | 1.00 | 0.00 | A | C |
| ATOM | 33 | CD  | ARG | A | 115 | 45.978 | -34.929 | -62.973 | 1.00 | 0.00 | A | C |
| ATOM | 34 | NE  | ARG | A | 115 | 46.684 | -33.883 | -62.178 | 1.00 | 0.00 | A | N |
| ATOM | 35 | CZ  | ARG | A | 115 | 46.023 | -32.746 | -61.809 | 1.00 | 0.00 | A | C |
| ATOM | 36 | NH1 | ARG | A | 115 | 44.714 | -32.582 | -62.148 | 1.00 | 0.00 | A | N |
| ATOM | 37 | NH2 | ARG | A | 115 | 46.672 | -31.780 | -61.093 | 1.00 | 0.00 | A | N |
| ATOM | 38 | C   | ARG | A | 115 | 47.690 | -33.414 | -66.756 | 1.00 | 0.00 | A | C |
| ATOM | 39 | O   | ARG | A | 115 | 46.646 | -33.013 | -67.268 | 1.00 | 0.00 | A | O |
| ATOM | 40 | N   | ARG | A | 116 | 48.727 | -32.604 | -66.497 | 1.00 | 0.00 | A | N |
| ATOM | 41 | CA  | ARG | A | 116 | 48.663 | -31.179 | -66.644 | 1.00 | 0.00 | A | C |
| ATOM | 42 | CB  | ARG | A | 116 | 49.998 | -30.523 | -66.255 | 1.00 | 0.00 | A | C |
| ATOM | 43 | CG  | ARG | A | 116 | 49.848 | -29.113 | -65.687 | 1.00 | 0.00 | A | C |
| ATOM | 44 | CD  | ARG | A | 116 | 49.109 | -28.122 | -66.579 | 1.00 | 0.00 | A | C |
| ATOM | 45 | NE  | ARG | A | 116 | 48.806 | -26.952 | -65.709 | 1.00 | 0.00 | A | N |
| ATOM | 46 | CZ  | ARG | A | 116 | 47.681 | -26.967 | -64.932 | 1.00 | 0.00 | A | C |
| ATOM | 47 | NH1 | ARG | A | 116 | 46.798 | -28.000 | -65.032 | 1.00 | 0.00 | A | N |
| ATOM | 48 | NH2 | ARG | A | 116 | 47.448 | -25.952 | -64.047 | 1.00 | 0.00 | A | N |
| ATOM | 49 | C   | ARG | A | 116 | 48.393 | -30.833 | -68.078 | 1.00 | 0.00 | A | C |
| ATOM | 50 | O   | ARG | A | 116 | 47.577 | -29.960 | -68.369 | 1.00 | 0.00 | A | O |
| ATOM | 51 | N   | SER | A | 117 | 49.060 | -31.530 | -69.018 | 1.00 | 0.00 | A | N |
| ATOM | 52 | CA  | SER | A | 117 | 48.963 | -31.187 | -70.408 | 1.00 | 0.00 | A | C |
| ATOM | 53 | CB  | SER | A | 117 | 49.845 | -32.075 | -71.304 | 1.00 | 0.00 | A | C |
| ATOM | 54 | OG  | SER | A | 117 | 49.447 | -33.435 | -71.201 | 1.00 | 0.00 | A | O |
| ATOM | 55 | C   | SER | A | 117 | 47.546 | -31.284 | -70.898 | 1.00 | 0.00 | A | C |
| ATOM | 56 | O   | SER | A | 117 | 47.064 | -30.371 | -71.565 | 1.00 | 0.00 | A | O |

|      |    |     |           |        |         |         |      |      |   |   |
|------|----|-----|-----------|--------|---------|---------|------|------|---|---|
| ATOM | 57 | N   | ILE A 118 | 46.840 | -32.388 | -70.588 | 1.00 | 0.00 | A | N |
| ATOM | 58 | CA  | ILE A 118 | 45.498 | -32.591 | -71.069 | 1.00 | 0.00 | A | C |
| ATOM | 59 | CB  | ILE A 118 | 44.954 | -33.955 | -70.766 | 1.00 | 0.00 | A | C |
| ATOM | 60 | CG2 | ILE A 118 | 43.497 | -33.991 | -71.255 | 1.00 | 0.00 | A | C |
| ATOM | 61 | CG1 | ILE A 118 | 45.834 | -35.043 | -71.403 | 1.00 | 0.00 | A | C |
| ATOM | 62 | CD  | ILE A 118 | 45.509 | -36.450 | -70.902 | 1.00 | 0.00 | A | C |
| ATOM | 63 | C   | ILE A 118 | 44.549 | -31.603 | -70.459 | 1.00 | 0.00 | A | C |
| ATOM | 64 | O   | ILE A 118 | 43.678 | -31.064 | -71.141 | 1.00 | 0.00 | A | O |
| ATOM | 65 | N   | PHE A 119 | 44.697 | -31.334 | -69.149 | 1.00 | 0.00 | A | N |
| ATOM | 66 | CA  | PHE A 119 | 43.794 | -30.470 | -68.444 | 1.00 | 0.00 | A | C |
| ATOM | 67 | CB  | PHE A 119 | 44.177 | -30.285 | -66.961 | 1.00 | 0.00 | A | C |
| ATOM | 68 | CG  | PHE A 119 | 43.609 | -31.414 | -66.165 | 1.00 | 0.00 | A | C |
| ATOM | 69 | CD1 | PHE A 119 | 44.091 | -32.694 | -66.291 | 1.00 | 0.00 | A | C |
| ATOM | 70 | CE1 | PHE A 119 | 43.551 | -33.723 | -65.556 | 1.00 | 0.00 | A | C |
| ATOM | 71 | CZ  | PHE A 119 | 42.513 | -33.486 | -64.689 | 1.00 | 0.00 | A | C |
| ATOM | 72 | CD2 | PHE A 119 | 42.555 | -31.188 | -65.308 | 1.00 | 0.00 | A | C |
| ATOM | 73 | CE2 | PHE A 119 | 42.010 | -32.211 | -64.568 | 1.00 | 0.00 | A | C |
| ATOM | 74 | C   | PHE A 119 | 43.789 | -29.126 | -69.093 | 1.00 | 0.00 | A | C |
| ATOM | 75 | O   | PHE A 119 | 42.731 | -28.509 | -69.228 | 1.00 | 0.00 | A | O |
| ATOM | 76 | N   | GLU A 120 | 44.972 | -28.623 | -69.484 | 1.00 | 0.00 | A | N |
| ATOM | 77 | CA  | GLU A 120 | 45.064 | -27.340 | -70.118 | 1.00 | 0.00 | A | C |
| ATOM | 78 | CB  | GLU A 120 | 46.518 | -26.874 | -70.303 | 1.00 | 0.00 | A | C |
| ATOM | 79 | CG  | GLU A 120 | 47.241 | -26.614 | -68.977 | 1.00 | 0.00 | A | C |
| ATOM | 80 | CD  | GLU A 120 | 46.628 | -25.381 | -68.320 | 1.00 | 0.00 | A | C |
| ATOM | 81 | OE1 | GLU A 120 | 45.379 | -25.240 | -68.378 | 1.00 | 0.00 | A | O |
| ATOM | 82 | OE2 | GLU A 120 | 47.405 | -24.567 | -67.754 | 1.00 | 0.00 | A | O |
| ATOM | 83 | C   | GLU A 120 | 44.410 | -27.392 | -71.467 | 1.00 | 0.00 | A | C |
| ATOM | 84 | O   | GLU A 120 | 43.746 | -26.440 | -71.877 | 1.00 | 0.00 | A | O |
| ATOM | 85 | N   | ALA A 121 | 44.578 | -28.506 | -72.200 | 1.00 | 0.00 | A | N |
| ATOM | 86 | CA  | ALA A 121 | 44.008 | -28.608 | -73.517 | 1.00 | 0.00 | A | C |
| ATOM | 87 | CB  | ALA A 121 | 44.337 | -29.943 | -74.207 | 1.00 | 0.00 | A | C |
| ATOM | 88 | C   | ALA A 121 | 42.515 | -28.516 | -73.405 | 1.00 | 0.00 | A | C |
| ATOM | 89 | O   | ALA A 121 | 41.866 | -27.835 | -74.197 | 1.00 | 0.00 | A | O |
| ATOM | 90 | N   | VAL A 122 | 41.941 | -29.195 | -72.395 | 1.00 | 0.00 | A | N |
| ATOM | 91 | CA  | VAL A 122 | 40.520 | -29.254 | -72.181 | 1.00 | 0.00 | A | C |
| ATOM | 92 | CB  | VAL A 122 | 40.152 | -30.159 | -71.039 | 1.00 | 0.00 | A | C |
| ATOM | 93 | CG1 | VAL A 122 | 38.643 | -30.043 | -70.772 | 1.00 | 0.00 | A | C |
| ATOM | 94 | CG2 | VAL A 122 | 40.605 | -31.587 | -71.389 | 1.00 | 0.00 | A | C |

|      |     |     |           |        |         |         |      |      |   |   |
|------|-----|-----|-----------|--------|---------|---------|------|------|---|---|
| ATOM | 95  | C   | VAL A 122 | 39.974 | -27.890 | -71.876 | 1.00 | 0.00 | A | C |
| ATOM | 96  | O   | VAL A 122 | 38.880 | -27.538 | -72.317 | 1.00 | 0.00 | A | O |
| ATOM | 97  | N   | ALA A 123 | 40.728 | -27.070 | -71.121 | 1.00 | 0.00 | A | N |
| ATOM | 98  | CA  | ALA A 123 | 40.229 | -25.787 | -70.706 | 1.00 | 0.00 | A | C |
| ATOM | 99  | CB  | ALA A 123 | 41.252 | -24.997 | -69.871 | 1.00 | 0.00 | A | C |
| ATOM | 100 | C   | ALA A 123 | 39.897 | -24.963 | -71.917 | 1.00 | 0.00 | A | C |
| ATOM | 101 | O   | ALA A 123 | 38.923 | -24.214 | -71.929 | 1.00 | 0.00 | A | O |
| ATOM | 102 | N   | GLN A 124 | 40.757 | -25.060 | -72.943 | 1.00 | 0.00 | A | N |
| ATOM | 103 | CA  | GLN A 124 | 40.722 | -24.392 | -74.216 | 1.00 | 0.00 | A | C |
| ATOM | 104 | CB  | GLN A 124 | 42.076 | -24.469 | -74.941 | 1.00 | 0.00 | A | C |
| ATOM | 105 | CG  | GLN A 124 | 43.224 | -23.830 | -74.161 | 1.00 | 0.00 | A | C |
| ATOM | 106 | CD  | GLN A 124 | 44.491 | -24.010 | -74.986 | 1.00 | 0.00 | A | C |
| ATOM | 107 | OE1 | GLN A 124 | 45.023 | -23.057 | -75.553 | 1.00 | 0.00 | A | O |
| ATOM | 108 | NE2 | GLN A 124 | 44.991 | -25.273 | -75.060 | 1.00 | 0.00 | A | N |
| ATOM | 109 | C   | GLN A 124 | 39.700 | -24.964 | -75.158 | 1.00 | 0.00 | A | C |
| ATOM | 110 | O   | GLN A 124 | 39.318 | -24.296 | -76.119 | 1.00 | 0.00 | A | O |
| ATOM | 111 | N   | ASN A 125 | 39.267 | -26.224 | -74.956 | 1.00 | 0.00 | A | N |
| ATOM | 112 | CA  | ASN A 125 | 38.402 | -26.864 | -75.912 | 1.00 | 0.00 | A | C |
| ATOM | 113 | CB  | ASN A 125 | 37.166 | -26.021 | -76.268 | 1.00 | 0.00 | A | C |
| ATOM | 114 | CG  | ASN A 125 | 36.216 | -26.886 | -77.083 | 1.00 | 0.00 | A | C |
| ATOM | 115 | OD1 | ASN A 125 | 35.772 | -27.934 | -76.619 | 1.00 | 0.00 | A | O |
| ATOM | 116 | ND2 | ASN A 125 | 35.895 | -26.441 | -78.328 | 1.00 | 0.00 | A | N |
| ATOM | 117 | C   | ASN A 125 | 39.189 | -27.097 | -77.169 | 1.00 | 0.00 | A | C |
| ATOM | 118 | O   | ASN A 125 | 38.686 | -26.905 | -78.277 | 1.00 | 0.00 | A | O |
| ATOM | 119 | N   | ASN A 126 | 40.457 | -27.535 | -77.023 | 1.00 | 0.00 | A | N |
| ATOM | 120 | CA  | ASN A 126 | 41.299 | -27.742 | -78.165 | 1.00 | 0.00 | A | C |
| ATOM | 121 | CB  | ASN A 126 | 42.727 | -27.209 | -77.944 | 1.00 | 0.00 | A | C |
| ATOM | 122 | CG  | ASN A 126 | 43.358 | -26.939 | -79.299 | 1.00 | 0.00 | A | C |
| ATOM | 123 | OD1 | ASN A 126 | 42.703 | -27.052 | -80.333 | 1.00 | 0.00 | A | O |
| ATOM | 124 | ND2 | ASN A 126 | 44.664 | -26.562 | -79.298 | 1.00 | 0.00 | A | N |
| ATOM | 125 | C   | ASN A 126 | 41.389 | -29.217 | -78.456 | 1.00 | 0.00 | A | C |
| ATOM | 126 | O   | ASN A 126 | 41.912 | -29.997 | -77.662 | 1.00 | 0.00 | A | O |
| ATOM | 127 | N   | CYS A 127 | 40.818 | -29.634 | -79.605 | 1.00 | 0.00 | A | N |
| ATOM | 128 | CA  | CYS A 127 | 40.816 | -30.990 | -80.088 | 1.00 | 0.00 | A | C |
| ATOM | 129 | CB  | CYS A 127 | 39.785 | -31.228 | -81.201 | 1.00 | 0.00 | A | C |
| ATOM | 130 | SG  | CYS A 127 | 38.083 | -31.186 | -80.575 | 1.00 | 0.00 | A | S |
| ATOM | 131 | C   | CYS A 127 | 42.153 | -31.403 | -80.635 | 1.00 | 0.00 | A | C |
| ATOM | 132 | O   | CYS A 127 | 42.477 | -32.588 | -80.637 | 1.00 | 0.00 | A | O |



|      |     |     |           |        |         |         |      |      |   |   |
|------|-----|-----|-----------|--------|---------|---------|------|------|---|---|
| ATOM | 133 | N   | GLN A 128 | 42.935 | -30.456 | -81.189 | 1.00 | 0.00 | A | N |
| ATOM | 134 | CA  | GLN A 128 | 44.165 | -30.805 | -81.857 | 1.00 | 0.00 | A | C |
| ATOM | 135 | CB  | GLN A 128 | 44.729 | -29.673 | -82.739 | 1.00 | 0.00 | A | C |
| ATOM | 136 | CG  | GLN A 128 | 43.865 | -29.420 | -83.978 | 1.00 | 0.00 | A | C |
| ATOM | 137 | CD  | GLN A 128 | 44.586 | -28.457 | -84.914 | 1.00 | 0.00 | A | C |
| ATOM | 138 | OE1 | GLN A 128 | 43.959 | -27.623 | -85.565 | 1.00 | 0.00 | A | O |
| ATOM | 139 | NE2 | GLN A 128 | 45.938 | -28.581 | -84.998 | 1.00 | 0.00 | A | N |
| ATOM | 140 | C   | GLN A 128 | 45.255 | -31.300 | -80.944 | 1.00 | 0.00 | A | C |
| ATOM | 141 | O   | GLN A 128 | 45.936 | -32.272 | -81.268 | 1.00 | 0.00 | A | O |
| ATOM | 142 | N   | ASP A 129 | 45.436 | -30.686 | -79.763 | 1.00 | 0.00 | A | N |
| ATOM | 143 | CA  | ASP A 129 | 46.526 | -31.055 | -78.895 | 1.00 | 0.00 | A | C |
| ATOM | 144 | CB  | ASP A 129 | 46.553 | -30.227 | -77.598 | 1.00 | 0.00 | A | C |
| ATOM | 145 | CG  | ASP A 129 | 46.934 | -28.798 | -77.960 | 1.00 | 0.00 | A | C |
| ATOM | 146 | OD1 | ASP A 129 | 47.420 | -28.589 | -79.104 | 1.00 | 0.00 | A | O |
| ATOM | 147 | OD2 | ASP A 129 | 46.743 | -27.897 | -77.100 | 1.00 | 0.00 | A | O |
| ATOM | 148 | C   | ASP A 129 | 46.362 | -32.498 | -78.524 | 1.00 | 0.00 | A | C |
| ATOM | 149 | O   | ASP A 129 | 47.316 | -33.174 | -78.144 | 1.00 | 0.00 | A | O |
| ATOM | 150 | N   | LEU A 130 | 45.100 | -32.951 | -78.544 | 1.00 | 0.00 | A | N |
| ATOM | 151 | CA  | LEU A 130 | 44.597 | -34.267 | -78.277 | 1.00 | 0.00 | A | C |
| ATOM | 152 | CB  | LEU A 130 | 43.094 | -34.265 | -77.946 | 1.00 | 0.00 | A | C |
| ATOM | 153 | CG  | LEU A 130 | 42.782 | -33.548 | -76.615 | 1.00 | 0.00 | A | C |
| ATOM | 154 | CD1 | LEU A 130 | 41.278 | -33.553 | -76.302 | 1.00 | 0.00 | A | C |
| ATOM | 155 | CD2 | LEU A 130 | 43.616 | -34.131 | -75.464 | 1.00 | 0.00 | A | C |
| ATOM | 156 | C   | LEU A 130 | 44.839 | -35.226 | -79.402 | 1.00 | 0.00 | A | C |
| ATOM | 157 | O   | LEU A 130 | 44.541 | -36.410 | -79.261 | 1.00 | 0.00 | A | O |
| ATOM | 158 | N   | GLU A 131 | 45.263 | -34.745 | -80.585 | 1.00 | 0.00 | A | N |
| ATOM | 159 | CA  | GLU A 131 | 45.404 | -35.610 | -81.726 | 1.00 | 0.00 | A | C |
| ATOM | 160 | CB  | GLU A 131 | 45.913 | -34.844 | -82.956 | 1.00 | 0.00 | A | C |
| ATOM | 161 | CG  | GLU A 131 | 44.927 | -33.759 | -83.403 | 1.00 | 0.00 | A | C |
| ATOM | 162 | CD  | GLU A 131 | 45.564 | -32.960 | -84.530 | 1.00 | 0.00 | A | C |
| ATOM | 163 | OE1 | GLU A 131 | 46.277 | -31.966 | -84.224 | 1.00 | 0.00 | A | O |
| ATOM | 164 | OE2 | GLU A 131 | 45.351 | -33.333 | -85.713 | 1.00 | 0.00 | A | O |
| ATOM | 165 | C   | GLU A 131 | 46.351 | -36.746 | -81.432 | 1.00 | 0.00 | A | C |
| ATOM | 166 | O   | GLU A 131 | 46.067 | -37.893 | -81.772 | 1.00 | 0.00 | A | O |
| ATOM | 167 | N   | SER A 132 | 47.506 | -36.471 | -80.797 | 1.00 | 0.00 | A | N |
| ATOM | 168 | CA  | SER A 132 | 48.487 | -37.486 | -80.503 | 1.00 | 0.00 | A | C |
| ATOM | 169 | CB  | SER A 132 | 49.882 | -36.895 | -80.227 | 1.00 | 0.00 | A | C |
| ATOM | 170 | OG  | SER A 132 | 50.391 | -36.270 | -81.396 | 1.00 | 0.00 | A | O |

|      |     |     |           |        |         |         |      |      |   |   |
|------|-----|-----|-----------|--------|---------|---------|------|------|---|---|
| ATOM | 171 | C   | SER A 132 | 48.104 | -38.298 | -79.296 | 1.00 | 0.00 | A | C |
| ATOM | 172 | O   | SER A 132 | 48.861 | -39.174 | -78.880 | 1.00 | 0.00 | A | O |
| ATOM | 173 | N   | LEU A 133 | 46.944 | -38.009 | -78.673 | 1.00 | 0.00 | A | N |
| ATOM | 174 | CA  | LEU A 133 | 46.589 | -38.615 | -77.418 | 1.00 | 0.00 | A | C |
| ATOM | 175 | CB  | LEU A 133 | 45.341 | -37.963 | -76.784 | 1.00 | 0.00 | A | C |
| ATOM | 176 | CG  | LEU A 133 | 44.958 | -38.548 | -75.407 | 1.00 | 0.00 | A | C |
| ATOM | 177 | CD1 | LEU A 133 | 46.108 | -38.392 | -74.399 | 1.00 | 0.00 | A | C |
| ATOM | 178 | CD2 | LEU A 133 | 43.644 | -37.941 | -74.876 | 1.00 | 0.00 | A | C |
| ATOM | 179 | C   | LEU A 133 | 46.363 | -40.106 | -77.466 | 1.00 | 0.00 | A | C |
| ATOM | 180 | O   | LEU A 133 | 47.002 | -40.845 | -76.717 | 1.00 | 0.00 | A | O |
| ATOM | 181 | N   | LEU A 134 | 45.509 | -40.610 | -78.381 | 1.00 | 0.00 | A | N |
| ATOM | 182 | CA  | LEU A 134 | 45.129 | -41.996 | -78.360 | 1.00 | 0.00 | A | C |
| ATOM | 183 | CB  | LEU A 134 | 44.152 | -42.329 | -79.502 | 1.00 | 0.00 | A | C |
| ATOM | 184 | CG  | LEU A 134 | 43.387 | -43.668 | -79.397 | 1.00 | 0.00 | A | C |
| ATOM | 185 | CD1 | LEU A 134 | 42.680 | -43.963 | -80.723 | 1.00 | 0.00 | A | C |
| ATOM | 186 | CD2 | LEU A 134 | 44.230 | -44.850 | -78.903 | 1.00 | 0.00 | A | C |
| ATOM | 187 | C   | LEU A 134 | 46.353 | -42.847 | -78.551 | 1.00 | 0.00 | A | C |
| ATOM | 188 | O   | LEU A 134 | 46.551 | -43.840 | -77.857 | 1.00 | 0.00 | A | O |
| ATOM | 189 | N   | LEU A 135 | 47.236 | -42.465 | -79.487 | 1.00 | 0.00 | A | N |
| ATOM | 190 | CA  | LEU A 135 | 48.372 | -43.284 | -79.787 | 1.00 | 0.00 | A | C |
| ATOM | 191 | CB  | LEU A 135 | 49.180 | -42.783 | -81.004 | 1.00 | 0.00 | A | C |
| ATOM | 192 | CG  | LEU A 135 | 49.699 | -41.336 | -80.914 | 1.00 | 0.00 | A | C |
| ATOM | 193 | CD1 | LEU A 135 | 50.813 | -41.189 | -79.867 | 1.00 | 0.00 | A | C |
| ATOM | 194 | CD2 | LEU A 135 | 50.112 | -40.815 | -82.301 | 1.00 | 0.00 | A | C |
| ATOM | 195 | C   | LEU A 135 | 49.277 | -43.416 | -78.595 | 1.00 | 0.00 | A | C |
| ATOM | 196 | O   | LEU A 135 | 49.912 | -44.455 | -78.427 | 1.00 | 0.00 | A | O |
| ATOM | 197 | N   | PHE A 136 | 49.375 | -42.375 | -77.745 | 1.00 | 0.00 | A | N |
| ATOM | 198 | CA  | PHE A 136 | 50.283 | -42.395 | -76.627 | 1.00 | 0.00 | A | C |
| ATOM | 199 | CB  | PHE A 136 | 50.275 | -41.060 | -75.855 | 1.00 | 0.00 | A | C |
| ATOM | 200 | CG  | PHE A 136 | 50.926 | -41.252 | -74.527 | 1.00 | 0.00 | A | C |
| ATOM | 201 | CD1 | PHE A 136 | 52.295 | -41.304 | -74.403 | 1.00 | 0.00 | A | C |
| ATOM | 202 | CE1 | PHE A 136 | 52.876 | -41.485 | -73.172 | 1.00 | 0.00 | A | C |
| ATOM | 203 | CZ  | PHE A 136 | 52.087 | -41.620 | -72.054 | 1.00 | 0.00 | A | C |
| ATOM | 204 | CD2 | PHE A 136 | 50.144 | -41.398 | -73.405 | 1.00 | 0.00 | A | C |
| ATOM | 205 | CE2 | PHE A 136 | 50.717 | -41.578 | -72.170 | 1.00 | 0.00 | A | C |
| ATOM | 206 | C   | PHE A 136 | 49.980 | -43.511 | -75.664 | 1.00 | 0.00 | A | C |
| ATOM | 207 | O   | PHE A 136 | 50.848 | -44.333 | -75.371 | 1.00 | 0.00 | A | O |
| ATOM | 208 | N   | LEU A 137 | 48.729 | -43.598 | -75.176 | 1.00 | 0.00 | A | N |

|      |     |     |           |        |         |         |      |      |   |   |
|------|-----|-----|-----------|--------|---------|---------|------|------|---|---|
| ATOM | 209 | CA  | LEU A 137 | 48.341 | -44.587 | -74.210 | 1.00 | 0.00 | A | C |
| ATOM | 210 | CB  | LEU A 137 | 46.992 | -44.349 | -73.488 | 1.00 | 0.00 | A | C |
| ATOM | 211 | CG  | LEU A 137 | 45.749 | -44.143 | -74.371 | 1.00 | 0.00 | A | C |
| ATOM | 212 | CD1 | LEU A 137 | 44.486 | -43.948 | -73.512 | 1.00 | 0.00 | A | C |
| ATOM | 213 | CD2 | LEU A 137 | 45.952 | -42.966 | -75.330 | 1.00 | 0.00 | A | C |
| ATOM | 214 | C   | LEU A 137 | 48.329 | -45.942 | -74.833 | 1.00 | 0.00 | A | C |
| ATOM | 215 | O   | LEU A 137 | 48.127 | -46.934 | -74.137 | 1.00 | 0.00 | A | O |
| ATOM | 216 | N   | GLN A 138 | 48.353 | -46.007 | -76.178 | 1.00 | 0.00 | A | N |
| ATOM | 217 | CA  | GLN A 138 | 48.450 | -47.280 | -76.829 | 1.00 | 0.00 | A | C |
| ATOM | 218 | CB  | GLN A 138 | 48.270 | -47.167 | -78.353 | 1.00 | 0.00 | A | C |
| ATOM | 219 | CG  | GLN A 138 | 46.865 | -46.718 | -78.767 | 1.00 | 0.00 | A | C |
| ATOM | 220 | CD  | GLN A 138 | 46.811 | -46.640 | -80.288 | 1.00 | 0.00 | A | C |
| ATOM | 221 | OE1 | GLN A 138 | 47.840 | -46.680 | -80.964 | 1.00 | 0.00 | A | O |
| ATOM | 222 | NE2 | GLN A 138 | 45.579 | -46.518 | -80.848 | 1.00 | 0.00 | A | N |
| ATOM | 223 | C   | GLN A 138 | 49.805 | -47.880 | -76.566 | 1.00 | 0.00 | A | C |
| ATOM | 224 | O   | GLN A 138 | 49.905 | -49.051 | -76.199 | 1.00 | 0.00 | A | O |
| ATOM | 225 | N   | LYS A 139 | 50.892 | -47.097 | -76.753 | 1.00 | 0.00 | A | N |
| ATOM | 226 | CA  | LYS A 139 | 52.207 | -47.643 | -76.534 | 1.00 | 0.00 | A | C |
| ATOM | 227 | CB  | LYS A 139 | 53.356 | -46.691 | -76.887 | 1.00 | 0.00 | A | C |
| ATOM | 228 | CG  | LYS A 139 | 54.706 | -47.304 | -76.501 | 1.00 | 0.00 | A | C |
| ATOM | 229 | CD  | LYS A 139 | 55.919 | -46.433 | -76.820 | 1.00 | 0.00 | A | C |
| ATOM | 230 | CE  | LYS A 139 | 57.221 | -46.980 | -76.230 | 1.00 | 0.00 | A | C |
| ATOM | 231 | NZ  | LYS A 139 | 58.324 | -46.024 | -76.469 | 1.00 | 0.00 | A | N |
| ATOM | 232 | C   | LYS A 139 | 52.421 | -47.948 | -75.089 | 1.00 | 0.00 | A | C |
| ATOM | 233 | O   | LYS A 139 | 52.735 | -49.079 | -74.720 | 1.00 | 0.00 | A | O |
| ATOM | 234 | N   | SER A 140 | 52.236 | -46.922 | -74.240 | 1.00 | 0.00 | A | N |
| ATOM | 235 | CA  | SER A 140 | 52.472 | -47.021 | -72.829 | 1.00 | 0.00 | A | C |
| ATOM | 236 | CB  | SER A 140 | 52.456 | -45.653 | -72.125 | 1.00 | 0.00 | A | C |
| ATOM | 237 | OG  | SER A 140 | 51.184 | -45.041 | -72.267 | 1.00 | 0.00 | A | O |
| ATOM | 238 | C   | SER A 140 | 51.413 | -47.875 | -72.218 | 1.00 | 0.00 | A | C |
| ATOM | 239 | O   | SER A 140 | 51.569 | -48.381 | -71.110 | 1.00 | 0.00 | A | O |
| ATOM | 240 | N   | LYS A 141 | 50.295 | -48.060 | -72.935 | 1.00 | 0.00 | A | N |
| ATOM | 241 | CA  | LYS A 141 | 49.208 | -48.839 | -72.423 | 1.00 | 0.00 | A | C |
| ATOM | 242 | CB  | LYS A 141 | 49.589 | -50.282 | -72.041 | 1.00 | 0.00 | A | C |
| ATOM | 243 | CG  | LYS A 141 | 49.910 | -51.200 | -73.222 | 1.00 | 0.00 | A | C |
| ATOM | 244 | CD  | LYS A 141 | 48.762 | -51.358 | -74.216 | 1.00 | 0.00 | A | C |
| ATOM | 245 | CE  | LYS A 141 | 48.955 | -52.528 | -75.183 | 1.00 | 0.00 | A | C |
| ATOM | 246 | NZ  | LYS A 141 | 50.257 | -52.416 | -75.876 | 1.00 | 0.00 | A | N |

|      |     |     |           |        |         |         |      |      |   |   |
|------|-----|-----|-----------|--------|---------|---------|------|------|---|---|
| ATOM | 247 | C   | LYS A 141 | 48.702 | -48.184 | -71.179 | 1.00 | 0.00 | A | C |
| ATOM | 248 | O   | LYS A 141 | 48.120 | -48.844 | -70.320 | 1.00 | 0.00 | A | O |
| ATOM | 249 | N   | LYS A 142 | 48.900 | -46.857 | -71.051 | 1.00 | 0.00 | A | N |
| ATOM | 250 | CA  | LYS A 142 | 48.397 | -46.149 | -69.911 | 1.00 | 0.00 | A | C |
| ATOM | 251 | CB  | LYS A 142 | 49.027 | -44.760 | -69.700 | 1.00 | 0.00 | A | C |
| ATOM | 252 | CG  | LYS A 142 | 50.426 | -44.813 | -69.079 | 1.00 | 0.00 | A | C |
| ATOM | 253 | CD  | LYS A 142 | 51.182 | -43.484 | -69.134 | 1.00 | 0.00 | A | C |
| ATOM | 254 | CE  | LYS A 142 | 52.379 | -43.424 | -68.182 | 1.00 | 0.00 | A | C |
| ATOM | 255 | NZ  | LYS A 142 | 53.322 | -44.529 | -68.468 | 1.00 | 0.00 | A | N |
| ATOM | 256 | C   | LYS A 142 | 46.932 | -45.953 | -70.124 | 1.00 | 0.00 | A | C |
| ATOM | 257 | O   | LYS A 142 | 46.451 | -45.999 | -71.254 | 1.00 | 0.00 | A | O |
| ATOM | 258 | N   | HSD A 143 | 46.170 | -45.753 | -69.028 | 1.00 | 0.00 | A | N |
| ATOM | 259 | CA  | HSD A 143 | 44.757 | -45.577 | -69.188 | 1.00 | 0.00 | A | C |
| ATOM | 260 | CB  | HSD A 143 | 43.899 | -46.562 | -68.369 | 1.00 | 0.00 | A | C |
| ATOM | 261 | ND1 | HSD A 143 | 43.316 | -48.470 | -69.947 | 1.00 | 0.00 | A | N |
| ATOM | 262 | CG  | HSD A 143 | 43.987 | -47.982 | -68.846 | 1.00 | 0.00 | A | C |
| ATOM | 263 | CE1 | HSD A 143 | 43.637 | -49.782 | -70.051 | 1.00 | 0.00 | A | C |
| ATOM | 264 | NE2 | HSD A 143 | 44.464 | -50.173 | -69.097 | 1.00 | 0.00 | A | N |
| ATOM | 265 | CD2 | HSD A 143 | 44.681 | -49.036 | -68.339 | 1.00 | 0.00 | A | C |
| ATOM | 266 | C   | HSD A 143 | 44.382 | -44.198 | -68.753 | 1.00 | 0.00 | A | C |
| ATOM | 267 | O   | HSD A 143 | 44.982 | -43.611 | -67.855 | 1.00 | 0.00 | A | O |
| ATOM | 268 | N   | LEU A 144 | 43.321 | -43.666 | -69.385 | 1.00 | 0.00 | A | N |
| ATOM | 269 | CA  | LEU A 144 | 42.808 | -42.349 | -69.152 | 1.00 | 0.00 | A | C |
| ATOM | 270 | CB  | LEU A 144 | 41.611 | -42.043 | -70.073 | 1.00 | 0.00 | A | C |
| ATOM | 271 | CG  | LEU A 144 | 41.126 | -40.586 | -70.022 | 1.00 | 0.00 | A | C |
| ATOM | 272 | CD1 | LEU A 144 | 42.227 | -39.632 | -70.509 | 1.00 | 0.00 | A | C |
| ATOM | 273 | CD2 | LEU A 144 | 39.815 | -40.407 | -70.804 | 1.00 | 0.00 | A | C |
| ATOM | 274 | C   | LEU A 144 | 42.346 | -42.298 | -67.720 | 1.00 | 0.00 | A | C |
| ATOM | 275 | O   | LEU A 144 | 42.186 | -41.229 | -67.136 | 1.00 | 0.00 | A | O |
| ATOM | 276 | N   | THR A 145 | 42.007 | -43.483 | -67.183 | 1.00 | 0.00 | A | N |
| ATOM | 277 | CA  | THR A 145 | 41.536 | -43.766 | -65.850 | 1.00 | 0.00 | A | C |
| ATOM | 278 | CB  | THR A 145 | 40.800 | -45.068 | -65.783 | 1.00 | 0.00 | A | C |
| ATOM | 279 | OG1 | THR A 145 | 41.657 | -46.136 | -66.155 | 1.00 | 0.00 | A | O |
| ATOM | 280 | CG2 | THR A 145 | 39.596 | -44.992 | -66.737 | 1.00 | 0.00 | A | C |
| ATOM | 281 | C   | THR A 145 | 42.617 | -43.816 | -64.806 | 1.00 | 0.00 | A | C |
| ATOM | 282 | O   | THR A 145 | 42.308 | -43.741 | -63.620 | 1.00 | 0.00 | A | O |
| ATOM | 283 | N   | ASP A 146 | 43.898 | -43.998 | -65.190 | 1.00 | 0.00 | A | N |
| ATOM | 284 | CA  | ASP A 146 | 44.942 | -44.218 | -64.218 | 1.00 | 0.00 | A | C |

|      |     |     |           |        |         |         |      |      |   |   |
|------|-----|-----|-----------|--------|---------|---------|------|------|---|---|
| ATOM | 285 | CB  | ASP A 146 | 46.352 | -44.270 | -64.829 | 1.00 | 0.00 | A | C |
| ATOM | 286 | CG  | ASP A 146 | 46.481 | -45.559 | -65.627 | 1.00 | 0.00 | A | C |
| ATOM | 287 | OD1 | ASP A 146 | 45.564 | -46.420 | -65.520 | 1.00 | 0.00 | A | O |
| ATOM | 288 | OD2 | ASP A 146 | 47.502 | -45.703 | -66.350 | 1.00 | 0.00 | A | O |
| ATOM | 289 | C   | ASP A 146 | 44.945 | -43.142 | -63.175 | 1.00 | 0.00 | A | C |
| ATOM | 290 | O   | ASP A 146 | 44.438 | -42.039 | -63.376 | 1.00 | 0.00 | A | O |
| ATOM | 291 | N   | ASN A 147 | 45.541 | -43.466 | -62.010 | 1.00 | 0.00 | A | N |
| ATOM | 292 | CA  | ASN A 147 | 45.578 | -42.606 | -60.857 | 1.00 | 0.00 | A | C |
| ATOM | 293 | CB  | ASN A 147 | 46.328 | -43.223 | -59.664 | 1.00 | 0.00 | A | C |
| ATOM | 294 | CG  | ASN A 147 | 45.524 | -44.410 | -59.150 | 1.00 | 0.00 | A | C |
| ATOM | 295 | OD1 | ASN A 147 | 46.056 | -45.509 | -58.998 | 1.00 | 0.00 | A | O |
| ATOM | 296 | ND2 | ASN A 147 | 44.212 | -44.189 | -58.869 | 1.00 | 0.00 | A | N |
| ATOM | 297 | C   | ASN A 147 | 46.273 | -41.329 | -61.222 | 1.00 | 0.00 | A | C |
| ATOM | 298 | O   | ASN A 147 | 45.928 | -40.261 | -60.718 | 1.00 | 0.00 | A | O |
| ATOM | 299 | N   | GLU A 148 | 47.263 | -41.420 | -62.129 | 1.00 | 0.00 | A | N |
| ATOM | 300 | CA  | GLU A 148 | 48.090 | -40.325 | -62.569 | 1.00 | 0.00 | A | C |
| ATOM | 301 | CB  | GLU A 148 | 49.000 | -40.728 | -63.743 | 1.00 | 0.00 | A | C |
| ATOM | 302 | CG  | GLU A 148 | 49.924 | -41.919 | -63.507 | 1.00 | 0.00 | A | C |
| ATOM | 303 | CD  | GLU A 148 | 50.368 | -42.397 | -64.886 | 1.00 | 0.00 | A | C |
| ATOM | 304 | OE1 | GLU A 148 | 49.492 | -42.492 | -65.789 | 1.00 | 0.00 | A | O |
| ATOM | 305 | OE2 | GLU A 148 | 51.585 | -42.671 | -65.059 | 1.00 | 0.00 | A | O |
| ATOM | 306 | C   | GLU A 148 | 47.233 | -39.269 | -63.201 | 1.00 | 0.00 | A | C |
| ATOM | 307 | O   | GLU A 148 | 47.526 | -38.077 | -63.132 | 1.00 | 0.00 | A | O |
| ATOM | 308 | N   | PHE A 149 | 46.190 | -39.722 | -63.909 | 1.00 | 0.00 | A | N |
| ATOM | 309 | CA  | PHE A 149 | 45.267 | -38.947 | -64.686 | 1.00 | 0.00 | A | C |
| ATOM | 310 | CB  | PHE A 149 | 44.546 | -39.769 | -65.769 | 1.00 | 0.00 | A | C |
| ATOM | 311 | CG  | PHE A 149 | 45.588 | -40.083 | -66.792 | 1.00 | 0.00 | A | C |
| ATOM | 312 | CD1 | PHE A 149 | 45.996 | -39.116 | -67.684 | 1.00 | 0.00 | A | C |
| ATOM | 313 | CE1 | PHE A 149 | 46.954 | -39.389 | -68.634 | 1.00 | 0.00 | A | C |
| ATOM | 314 | CZ  | PHE A 149 | 47.521 | -40.640 | -68.702 | 1.00 | 0.00 | A | C |
| ATOM | 315 | CD2 | PHE A 149 | 46.160 | -41.332 | -66.870 | 1.00 | 0.00 | A | C |
| ATOM | 316 | CE2 | PHE A 149 | 47.119 | -41.612 | -67.818 | 1.00 | 0.00 | A | C |
| ATOM | 317 | C   | PHE A 149 | 44.265 | -38.196 | -63.856 | 1.00 | 0.00 | A | C |
| ATOM | 318 | O   | PHE A 149 | 43.505 | -37.395 | -64.397 | 1.00 | 0.00 | A | O |
| ATOM | 319 | N   | LYS A 150 | 44.128 | -38.521 | -62.558 | 1.00 | 0.00 | A | N |
| ATOM | 320 | CA  | LYS A 150 | 43.137 | -37.856 | -61.751 | 1.00 | 0.00 | A | C |
| ATOM | 321 | CB  | LYS A 150 | 42.359 | -38.831 | -60.859 | 1.00 | 0.00 | A | C |
| ATOM | 322 | CG  | LYS A 150 | 41.796 | -40.057 | -61.574 | 1.00 | 0.00 | A | C |

|      |     |     |     |   |     |        |         |         |      |      |   |   |
|------|-----|-----|-----|---|-----|--------|---------|---------|------|------|---|---|
| ATOM | 323 | CD  | LYS | A | 150 | 41.403 | -41.154 | -60.580 | 1.00 | 0.00 | A | C |
| ATOM | 324 | CE  | LYS | A | 150 | 41.092 | -42.508 | -61.216 | 1.00 | 0.00 | A | C |
| ATOM | 325 | NZ  | LYS | A | 150 | 40.939 | -43.532 | -60.158 | 1.00 | 0.00 | A | N |
| ATOM | 326 | C   | LYS | A | 150 | 43.805 | -36.931 | -60.773 | 1.00 | 0.00 | A | C |
| ATOM | 327 | O   | LYS | A | 150 | 44.971 | -37.107 | -60.420 | 1.00 | 0.00 | A | O |
| ATOM | 328 | N   | ASP | A | 151 | 43.064 | -35.893 | -60.315 | 1.00 | 0.00 | A | N |
| ATOM | 329 | CA  | ASP | A | 151 | 43.549 | -35.008 | -59.293 | 1.00 | 0.00 | A | C |
| ATOM | 330 | CB  | ASP | A | 151 | 42.632 | -33.787 | -59.084 | 1.00 | 0.00 | A | C |
| ATOM | 331 | CG  | ASP | A | 151 | 43.228 | -32.828 | -58.061 | 1.00 | 0.00 | A | C |
| ATOM | 332 | OD1 | ASP | A | 151 | 44.323 | -33.126 | -57.513 | 1.00 | 0.00 | A | O |
| ATOM | 333 | OD2 | ASP | A | 151 | 42.583 | -31.774 | -57.814 | 1.00 | 0.00 | A | O |
| ATOM | 334 | C   | ASP | A | 151 | 43.561 | -35.816 | -58.035 | 1.00 | 0.00 | A | C |
| ATOM | 335 | O   | ASP | A | 151 | 42.564 | -36.431 | -57.656 | 1.00 | 0.00 | A | O |
| ATOM | 336 | N   | PRO | A | 152 | 44.668 | -35.797 | -57.360 | 1.00 | 0.00 | A | N |
| ATOM | 337 | CD  | PRO | A | 152 | 45.933 | -35.403 | -57.958 | 1.00 | 0.00 | A | C |
| ATOM | 338 | CA  | PRO | A | 152 | 44.849 | -36.625 | -56.204 | 1.00 | 0.00 | A | C |
| ATOM | 339 | CB  | PRO | A | 152 | 46.332 | -36.502 | -55.837 | 1.00 | 0.00 | A | C |
| ATOM | 340 | CG  | PRO | A | 152 | 46.885 | -35.390 | -56.757 | 1.00 | 0.00 | A | C |
| ATOM | 341 | C   | PRO | A | 152 | 43.901 | -36.387 | -55.065 | 1.00 | 0.00 | A | C |
| ATOM | 342 | O   | PRO | A | 152 | 43.670 | -37.334 | -54.311 | 1.00 | 0.00 | A | O |
| ATOM | 343 | N   | GLU | A | 153 | 43.444 | -35.138 | -54.829 | 1.00 | 0.00 | A | N |
| ATOM | 344 | CA  | GLU | A | 153 | 42.509 | -34.908 | -53.757 | 1.00 | 0.00 | A | C |
| ATOM | 345 | CB  | GLU | A | 153 | 42.560 | -33.472 | -53.198 | 1.00 | 0.00 | A | C |
| ATOM | 346 | CG  | GLU | A | 153 | 42.393 | -32.368 | -54.244 | 1.00 | 0.00 | A | C |
| ATOM | 347 | CD  | GLU | A | 153 | 43.771 | -31.780 | -54.522 | 1.00 | 0.00 | A | C |
| ATOM | 348 | OE1 | GLU | A | 153 | 44.718 | -32.110 | -53.759 | 1.00 | 0.00 | A | O |
| ATOM | 349 | OE2 | GLU | A | 153 | 43.893 | -30.989 | -55.494 | 1.00 | 0.00 | A | O |
| ATOM | 350 | C   | GLU | A | 153 | 41.070 | -35.198 | -54.114 | 1.00 | 0.00 | A | C |
| ATOM | 351 | O   | GLU | A | 153 | 40.367 | -35.886 | -53.374 | 1.00 | 0.00 | A | O |
| ATOM | 352 | N   | THR | A | 154 | 40.599 | -34.597 | -55.233 | 1.00 | 0.00 | A | N |
| ATOM | 353 | CA  | THR | A | 154 | 39.237 | -34.644 | -55.714 | 1.00 | 0.00 | A | C |
| ATOM | 354 | CB  | THR | A | 154 | 38.913 | -33.490 | -56.616 | 1.00 | 0.00 | A | C |
| ATOM | 355 | OG1 | THR | A | 154 | 39.738 | -33.520 | -57.771 | 1.00 | 0.00 | A | O |
| ATOM | 356 | CG2 | THR | A | 154 | 39.140 | -32.184 | -55.841 | 1.00 | 0.00 | A | C |
| ATOM | 357 | C   | THR | A | 154 | 38.867 | -35.898 | -56.455 | 1.00 | 0.00 | A | C |
| ATOM | 358 | O   | THR | A | 154 | 37.764 | -36.422 | -56.287 | 1.00 | 0.00 | A | O |
| ATOM | 359 | N   | GLY | A | 155 | 39.769 | -36.414 | -57.313 | 1.00 | 0.00 | A | N |
| ATOM | 360 | CA  | GLY | A | 155 | 39.440 | -37.563 | -58.114 | 1.00 | 0.00 | A | C |

|      |     |     |           |        |         |         |      |      |   |   |
|------|-----|-----|-----------|--------|---------|---------|------|------|---|---|
| ATOM | 361 | C   | GLY A 155 | 38.885 | -37.103 | -59.435 | 1.00 | 0.00 | A | C |
| ATOM | 362 | O   | GLY A 155 | 38.288 | -37.887 | -60.172 | 1.00 | 0.00 | A | O |
| ATOM | 363 | N   | LYS A 156 | 39.076 | -35.811 | -59.767 | 1.00 | 0.00 | A | N |
| ATOM | 364 | CA  | LYS A 156 | 38.608 | -35.223 | -60.993 | 1.00 | 0.00 | A | C |
| ATOM | 365 | CB  | LYS A 156 | 38.793 | -33.695 | -61.002 | 1.00 | 0.00 | A | C |
| ATOM | 366 | CG  | LYS A 156 | 38.246 | -32.977 | -62.236 | 1.00 | 0.00 | A | C |
| ATOM | 367 | CD  | LYS A 156 | 38.251 | -31.454 | -62.087 | 1.00 | 0.00 | A | C |
| ATOM | 368 | CE  | LYS A 156 | 39.559 | -30.914 | -61.497 | 1.00 | 0.00 | A | C |
| ATOM | 369 | NZ  | LYS A 156 | 39.503 | -29.440 | -61.377 | 1.00 | 0.00 | A | N |
| ATOM | 370 | C   | LYS A 156 | 39.385 | -35.795 | -62.146 | 1.00 | 0.00 | A | C |
| ATOM | 371 | O   | LYS A 156 | 40.577 | -36.083 | -62.034 | 1.00 | 0.00 | A | O |
| ATOM | 372 | N   | THR A 157 | 38.701 | -35.975 | -63.296 | 1.00 | 0.00 | A | N |
| ATOM | 373 | CA  | THR A 157 | 39.310 | -36.512 | -64.482 | 1.00 | 0.00 | A | C |
| ATOM | 374 | CB  | THR A 157 | 38.638 | -37.756 | -64.980 | 1.00 | 0.00 | A | C |
| ATOM | 375 | OG1 | THR A 157 | 37.293 | -37.478 | -65.335 | 1.00 | 0.00 | A | O |
| ATOM | 376 | CG2 | THR A 157 | 38.685 | -38.811 | -63.860 | 1.00 | 0.00 | A | C |
| ATOM | 377 | C   | THR A 157 | 39.183 | -35.464 | -65.540 | 1.00 | 0.00 | A | C |
| ATOM | 378 | O   | THR A 157 | 38.542 | -34.436 | -65.333 | 1.00 | 0.00 | A | O |
| ATOM | 379 | N   | CYS A 158 | 39.808 | -35.697 | -66.709 | 1.00 | 0.00 | A | N |
| ATOM | 380 | CA  | CYS A 158 | 39.797 | -34.731 | -67.769 | 1.00 | 0.00 | A | C |
| ATOM | 381 | CB  | CYS A 158 | 40.630 | -35.181 | -68.980 | 1.00 | 0.00 | A | C |
| ATOM | 382 | SG  | CYS A 158 | 40.079 | -36.779 | -69.645 | 1.00 | 0.00 | A | S |
| ATOM | 383 | C   | CYS A 158 | 38.386 | -34.502 | -68.210 | 1.00 | 0.00 | A | C |
| ATOM | 384 | O   | CYS A 158 | 37.992 | -33.368 | -68.481 | 1.00 | 0.00 | A | O |
| ATOM | 385 | N   | LEU A 159 | 37.570 | -35.567 | -68.279 | 1.00 | 0.00 | A | N |
| ATOM | 386 | CA  | LEU A 159 | 36.217 | -35.385 | -68.714 | 1.00 | 0.00 | A | C |
| ATOM | 387 | CB  | LEU A 159 | 35.394 | -36.680 | -68.755 | 1.00 | 0.00 | A | C |
| ATOM | 388 | CG  | LEU A 159 | 33.959 | -36.425 | -69.249 | 1.00 | 0.00 | A | C |
| ATOM | 389 | CD1 | LEU A 159 | 33.939 | -36.096 | -70.749 | 1.00 | 0.00 | A | C |
| ATOM | 390 | CD2 | LEU A 159 | 33.008 | -37.561 | -68.873 | 1.00 | 0.00 | A | C |
| ATOM | 391 | C   | LEU A 159 | 35.533 | -34.466 | -67.743 | 1.00 | 0.00 | A | C |
| ATOM | 392 | O   | LEU A 159 | 34.728 | -33.625 | -68.138 | 1.00 | 0.00 | A | O |
| ATOM | 393 | N   | LEU A 160 | 35.818 | -34.628 | -66.438 | 1.00 | 0.00 | A | N |
| ATOM | 394 | CA  | LEU A 160 | 35.215 | -33.789 | -65.439 | 1.00 | 0.00 | A | C |
| ATOM | 395 | CB  | LEU A 160 | 35.526 | -34.266 | -64.009 | 1.00 | 0.00 | A | C |
| ATOM | 396 | CG  | LEU A 160 | 34.825 | -35.595 | -63.651 | 1.00 | 0.00 | A | C |
| ATOM | 397 | CD1 | LEU A 160 | 35.151 | -36.044 | -62.218 | 1.00 | 0.00 | A | C |
| ATOM | 398 | CD2 | LEU A 160 | 33.308 | -35.499 | -63.887 | 1.00 | 0.00 | A | C |

|      |     |     |           |        |         |         |      |      |   |   |
|------|-----|-----|-----------|--------|---------|---------|------|------|---|---|
| ATOM | 399 | C   | LEU A 160 | 35.693 | -32.374 | -65.606 | 1.00 | 0.00 | A | C |
| ATOM | 400 | O   | LEU A 160 | 34.901 | -31.440 | -65.506 | 1.00 | 0.00 | A | O |
| ATOM | 401 | N   | LYS A 161 | 37.001 | -32.164 | -65.876 | 1.00 | 0.00 | A | N |
| ATOM | 402 | CA  | LYS A 161 | 37.456 | -30.807 | -66.035 | 1.00 | 0.00 | A | C |
| ATOM | 403 | CB  | LYS A 161 | 38.963 | -30.619 | -66.277 | 1.00 | 0.00 | A | C |
| ATOM | 404 | CG  | LYS A 161 | 39.284 | -29.125 | -66.419 | 1.00 | 0.00 | A | C |
| ATOM | 405 | CD  | LYS A 161 | 40.751 | -28.735 | -66.253 | 1.00 | 0.00 | A | C |
| ATOM | 406 | CE  | LYS A 161 | 40.993 | -27.232 | -66.424 | 1.00 | 0.00 | A | C |
| ATOM | 407 | NZ  | LYS A 161 | 42.397 | -26.900 | -66.099 | 1.00 | 0.00 | A | N |
| ATOM | 408 | C   | LYS A 161 | 36.741 | -30.220 | -67.206 | 1.00 | 0.00 | A | C |
| ATOM | 409 | O   | LYS A 161 | 36.369 | -29.048 | -67.197 | 1.00 | 0.00 | A | O |
| ATOM | 410 | N   | ALA A 162 | 36.526 | -31.040 | -68.246 | 1.00 | 0.00 | A | N |
| ATOM | 411 | CA  | ALA A 162 | 35.850 | -30.600 | -69.429 | 1.00 | 0.00 | A | C |
| ATOM | 412 | CB  | ALA A 162 | 35.714 | -31.723 | -70.476 | 1.00 | 0.00 | A | C |
| ATOM | 413 | C   | ALA A 162 | 34.472 | -30.171 | -69.034 | 1.00 | 0.00 | A | C |
| ATOM | 414 | O   | ALA A 162 | 33.939 | -29.195 | -69.561 | 1.00 | 0.00 | A | O |
| ATOM | 415 | N   | MET A 163 | 33.856 | -30.899 | -68.083 | 1.00 | 0.00 | A | N |
| ATOM | 416 | CA  | MET A 163 | 32.521 | -30.596 | -67.659 | 1.00 | 0.00 | A | C |
| ATOM | 417 | CB  | MET A 163 | 31.959 | -31.640 | -66.679 | 1.00 | 0.00 | A | C |
| ATOM | 418 | CG  | MET A 163 | 31.725 | -32.993 | -67.356 | 1.00 | 0.00 | A | C |
| ATOM | 419 | SD  | MET A 163 | 30.451 | -32.946 | -68.653 | 1.00 | 0.00 | A | S |
| ATOM | 420 | CE  | MET A 163 | 30.852 | -34.573 | -69.352 | 1.00 | 0.00 | A | C |
| ATOM | 421 | C   | MET A 163 | 32.483 | -29.241 | -67.021 | 1.00 | 0.00 | A | C |
| ATOM | 422 | O   | MET A 163 | 31.501 | -28.514 | -67.170 | 1.00 | 0.00 | A | O |
| ATOM | 423 | N   | LEU A 164 | 33.514 | -28.888 | -66.232 | 1.00 | 0.00 | A | N |
| ATOM | 424 | CA  | LEU A 164 | 33.569 | -27.583 | -65.632 | 1.00 | 0.00 | A | C |
| ATOM | 425 | CB  | LEU A 164 | 34.590 | -27.470 | -64.490 | 1.00 | 0.00 | A | C |
| ATOM | 426 | CG  | LEU A 164 | 34.176 | -28.253 | -63.228 | 1.00 | 0.00 | A | C |
| ATOM | 427 | CD1 | LEU A 164 | 32.844 | -27.732 | -62.665 | 1.00 | 0.00 | A | C |
| ATOM | 428 | CD2 | LEU A 164 | 34.163 | -29.768 | -63.464 | 1.00 | 0.00 | A | C |
| ATOM | 429 | C   | LEU A 164 | 33.888 | -26.540 | -66.659 | 1.00 | 0.00 | A | C |
| ATOM | 430 | O   | LEU A 164 | 33.343 | -25.437 | -66.626 | 1.00 | 0.00 | A | O |
| ATOM | 431 | N   | ASN A 165 | 34.792 | -26.852 | -67.608 | 1.00 | 0.00 | A | N |
| ATOM | 432 | CA  | ASN A 165 | 35.181 | -25.839 | -68.546 | 1.00 | 0.00 | A | C |
| ATOM | 433 | CB  | ASN A 165 | 36.621 | -26.017 | -69.065 | 1.00 | 0.00 | A | C |
| ATOM | 434 | CG  | ASN A 165 | 37.619 | -25.761 | -67.937 | 1.00 | 0.00 | A | C |
| ATOM | 435 | OD1 | ASN A 165 | 38.778 | -25.446 | -68.201 | 1.00 | 0.00 | A | O |
| ATOM | 436 | ND2 | ASN A 165 | 37.180 | -25.900 | -66.658 | 1.00 | 0.00 | A | N |



|      |     |     |           |        |         |         |      |      |   |   |
|------|-----|-----|-----------|--------|---------|---------|------|------|---|---|
| ATOM | 437 | C   | ASN A 165 | 34.282 | -25.911 | -69.736 | 1.00 | 0.00 | A | C |
| ATOM | 438 | O   | ASN A 165 | 34.685 | -26.365 | -70.807 | 1.00 | 0.00 | A | O |
| ATOM | 439 | N   | LEU A 166 | 33.037 | -25.422 | -69.594 | 1.00 | 0.00 | A | N |
| ATOM | 440 | CA  | LEU A 166 | 32.149 | -25.440 | -70.717 | 1.00 | 0.00 | A | C |
| ATOM | 441 | CB  | LEU A 166 | 30.709 | -25.869 | -70.385 | 1.00 | 0.00 | A | C |
| ATOM | 442 | CG  | LEU A 166 | 30.572 | -27.353 | -70.006 | 1.00 | 0.00 | A | C |
| ATOM | 443 | CD1 | LEU A 166 | 29.112 | -27.710 | -69.690 | 1.00 | 0.00 | A | C |
| ATOM | 444 | CD2 | LEU A 166 | 31.174 | -28.261 | -71.091 | 1.00 | 0.00 | A | C |
| ATOM | 445 | C   | LEU A 166 | 32.072 | -24.061 | -71.274 | 1.00 | 0.00 | A | C |
| ATOM | 446 | O   | LEU A 166 | 32.213 | -23.077 | -70.551 | 1.00 | 0.00 | A | O |
| ATOM | 447 | N   | HSD A 167 | 31.904 | -23.974 | -72.607 | 1.00 | 0.00 | A | N |
| ATOM | 448 | CA  | HSD A 167 | 31.690 | -22.712 | -73.247 | 1.00 | 0.00 | A | C |
| ATOM | 449 | CB  | HSD A 167 | 32.826 | -22.278 | -74.194 | 1.00 | 0.00 | A | C |
| ATOM | 450 | ND1 | HSD A 167 | 33.449 | -24.394 | -75.461 | 1.00 | 0.00 | A | N |
| ATOM | 451 | CG  | HSD A 167 | 32.958 | -23.108 | -75.437 | 1.00 | 0.00 | A | C |
| ATOM | 452 | CE1 | HSD A 167 | 33.405 | -24.806 | -76.753 | 1.00 | 0.00 | A | C |
| ATOM | 453 | NE2 | HSD A 167 | 32.921 | -23.877 | -77.558 | 1.00 | 0.00 | A | N |
| ATOM | 454 | CD2 | HSD A 167 | 32.640 | -22.808 | -76.728 | 1.00 | 0.00 | A | C |
| ATOM | 455 | C   | HSD A 167 | 30.433 | -22.895 | -74.041 | 1.00 | 0.00 | A | C |
| ATOM | 456 | O   | HSD A 167 | 30.332 | -23.800 | -74.871 | 1.00 | 0.00 | A | O |
| ATOM | 457 | N   | ASP A 168 | 29.420 | -22.049 | -73.780 | 1.00 | 0.00 | A | N |
| ATOM | 458 | CA  | ASP A 168 | 28.168 | -22.156 | -74.472 | 1.00 | 0.00 | A | C |
| ATOM | 459 | CB  | ASP A 168 | 28.254 | -21.795 | -75.968 | 1.00 | 0.00 | A | C |
| ATOM | 460 | CG  | ASP A 168 | 28.194 | -20.278 | -76.089 | 1.00 | 0.00 | A | C |
| ATOM | 461 | OD1 | ASP A 168 | 27.069 | -19.727 | -75.928 | 1.00 | 0.00 | A | O |
| ATOM | 462 | OD2 | ASP A 168 | 29.256 | -19.646 | -76.326 | 1.00 | 0.00 | A | O |
| ATOM | 463 | C   | ASP A 168 | 27.617 | -23.539 | -74.326 | 1.00 | 0.00 | A | C |
| ATOM | 464 | O   | ASP A 168 | 26.981 | -24.057 | -75.244 | 1.00 | 0.00 | A | O |
| ATOM | 465 | N   | GLY A 169 | 27.837 | -24.176 | -73.160 | 1.00 | 0.00 | A | N |
| ATOM | 466 | CA  | GLY A 169 | 27.277 | -25.470 | -72.892 | 1.00 | 0.00 | A | C |
| ATOM | 467 | C   | GLY A 169 | 27.838 | -26.471 | -73.854 | 1.00 | 0.00 | A | C |
| ATOM | 468 | O   | GLY A 169 | 27.185 | -27.472 | -74.148 | 1.00 | 0.00 | A | O |
| ATOM | 469 | N   | GLN A 170 | 29.067 | -26.239 | -74.364 | 1.00 | 0.00 | A | N |
| ATOM | 470 | CA  | GLN A 170 | 29.610 | -27.146 | -75.340 | 1.00 | 0.00 | A | C |
| ATOM | 471 | CB  | GLN A 170 | 29.540 | -26.599 | -76.774 | 1.00 | 0.00 | A | C |
| ATOM | 472 | CG  | GLN A 170 | 28.114 | -26.400 | -77.285 | 1.00 | 0.00 | A | C |
| ATOM | 473 | CD  | GLN A 170 | 28.193 | -25.747 | -78.659 | 1.00 | 0.00 | A | C |
| ATOM | 474 | OE1 | GLN A 170 | 27.664 | -24.658 | -78.872 | 1.00 | 0.00 | A | O |

|      |     |     |     |   |     |        |         |         |      |      |   |   |
|------|-----|-----|-----|---|-----|--------|---------|---------|------|------|---|---|
| ATOM | 475 | NE2 | GLN | A | 170 | 28.875 | -26.427 | -79.617 | 1.00 | 0.00 | A | N |
| ATOM | 476 | C   | GLN | A | 170 | 31.059 | -27.421 | -75.075 | 1.00 | 0.00 | A | C |
| ATOM | 477 | O   | GLN | A | 170 | 31.794 | -26.574 | -74.566 | 1.00 | 0.00 | A | O |
| ATOM | 478 | N   | ASN | A | 171 | 31.488 | -28.658 | -75.406 | 1.00 | 0.00 | A | N |
| ATOM | 479 | CA  | ASN | A | 171 | 32.864 | -29.057 | -75.306 | 1.00 | 0.00 | A | C |
| ATOM | 480 | CB  | ASN | A | 171 | 33.266 | -29.371 | -73.851 | 1.00 | 0.00 | A | C |
| ATOM | 481 | CG  | ASN | A | 171 | 34.780 | -29.423 | -73.744 | 1.00 | 0.00 | A | C |
| ATOM | 482 | OD1 | ASN | A | 171 | 35.482 | -29.611 | -74.735 | 1.00 | 0.00 | A | O |
| ATOM | 483 | ND2 | ASN | A | 171 | 35.298 | -29.254 | -72.498 | 1.00 | 0.00 | A | N |
| ATOM | 484 | C   | ASN | A | 171 | 32.993 | -30.322 | -76.109 | 1.00 | 0.00 | A | C |
| ATOM | 485 | O   | ASN | A | 171 | 32.353 | -31.328 | -75.805 | 1.00 | 0.00 | A | O |
| ATOM | 486 | N   | THR | A | 172 | 33.785 | -30.269 | -77.198 | 1.00 | 0.00 | A | N |
| ATOM | 487 | CA  | THR | A | 172 | 34.091 | -31.339 | -78.111 | 1.00 | 0.00 | A | C |
| ATOM | 488 | CB  | THR | A | 172 | 34.571 | -30.824 | -79.431 | 1.00 | 0.00 | A | C |
| ATOM | 489 | OG1 | THR | A | 172 | 35.752 | -30.055 | -79.258 | 1.00 | 0.00 | A | O |
| ATOM | 490 | CG2 | THR | A | 172 | 33.459 | -29.951 | -80.039 | 1.00 | 0.00 | A | C |
| ATOM | 491 | C   | THR | A | 172 | 35.142 | -32.240 | -77.543 | 1.00 | 0.00 | A | C |
| ATOM | 492 | O   | THR | A | 172 | 35.293 | -33.386 | -77.965 | 1.00 | 0.00 | A | O |
| ATOM | 493 | N   | THR | A | 173 | 35.945 | -31.708 | -76.607 | 1.00 | 0.00 | A | N |
| ATOM | 494 | CA  | THR | A | 173 | 36.991 | -32.453 | -75.981 | 1.00 | 0.00 | A | C |
| ATOM | 495 | CB  | THR | A | 173 | 37.684 | -31.663 | -74.906 | 1.00 | 0.00 | A | C |
| ATOM | 496 | OG1 | THR | A | 173 | 38.289 | -30.500 | -75.456 | 1.00 | 0.00 | A | O |
| ATOM | 497 | CG2 | THR | A | 173 | 38.747 | -32.546 | -74.236 | 1.00 | 0.00 | A | C |
| ATOM | 498 | C   | THR | A | 173 | 36.331 | -33.629 | -75.344 | 1.00 | 0.00 | A | C |
| ATOM | 499 | O   | THR | A | 173 | 36.913 | -34.711 | -75.275 | 1.00 | 0.00 | A | O |
| ATOM | 500 | N   | ILE | A | 174 | 35.096 | -33.445 | -74.839 | 1.00 | 0.00 | A | N |
| ATOM | 501 | CA  | ILE | A | 174 | 34.403 | -34.535 | -74.219 | 1.00 | 0.00 | A | C |
| ATOM | 502 | CB  | ILE | A | 174 | 33.079 | -34.149 | -73.616 | 1.00 | 0.00 | A | C |
| ATOM | 503 | CG2 | ILE | A | 174 | 32.371 | -35.435 | -73.159 | 1.00 | 0.00 | A | C |
| ATOM | 504 | CG1 | ILE | A | 174 | 33.261 | -33.120 | -72.488 | 1.00 | 0.00 | A | C |
| ATOM | 505 | CD  | ILE | A | 174 | 31.948 | -32.489 | -72.029 | 1.00 | 0.00 | A | C |
| ATOM | 506 | C   | ILE | A | 174 | 34.155 | -35.611 | -75.238 | 1.00 | 0.00 | A | C |
| ATOM | 507 | O   | ILE | A | 174 | 34.463 | -36.772 | -74.976 | 1.00 | 0.00 | A | O |
| ATOM | 508 | N   | PRO | A | 175 | 33.648 | -35.297 | -76.407 | 1.00 | 0.00 | A | N |
| ATOM | 509 | CD  | PRO | A | 175 | 32.846 | -34.105 | -76.629 | 1.00 | 0.00 | A | C |
| ATOM | 510 | CA  | PRO | A | 175 | 33.381 | -36.318 | -77.380 | 1.00 | 0.00 | A | C |
| ATOM | 511 | CB  | PRO | A | 175 | 32.675 | -35.616 | -78.535 | 1.00 | 0.00 | A | C |
| ATOM | 512 | CG  | PRO | A | 175 | 31.969 | -34.427 | -77.853 | 1.00 | 0.00 | A | C |

|      |     |     |           |        |         |         |      |      |   |   |
|------|-----|-----|-----------|--------|---------|---------|------|------|---|---|
| ATOM | 513 | C   | PRO A 175 | 34.626 | -37.047 | -77.764 | 1.00 | 0.00 | A | C |
| ATOM | 514 | O   | PRO A 175 | 34.563 | -38.254 | -77.991 | 1.00 | 0.00 | A | O |
| ATOM | 515 | N   | LEU A 176 | 35.754 | -36.327 | -77.876 | 1.00 | 0.00 | A | N |
| ATOM | 516 | CA  | LEU A 176 | 36.998 | -36.943 | -78.225 | 1.00 | 0.00 | A | C |
| ATOM | 517 | CB  | LEU A 176 | 38.063 | -35.893 | -78.607 | 1.00 | 0.00 | A | C |
| ATOM | 518 | CG  | LEU A 176 | 39.383 | -36.445 | -79.192 | 1.00 | 0.00 | A | C |
| ATOM | 519 | CD1 | LEU A 176 | 40.269 | -35.295 | -79.692 | 1.00 | 0.00 | A | C |
| ATOM | 520 | CD2 | LEU A 176 | 40.144 | -37.352 | -78.211 | 1.00 | 0.00 | A | C |
| ATOM | 521 | C   | LEU A 176 | 37.473 | -37.762 | -77.063 | 1.00 | 0.00 | A | C |
| ATOM | 522 | O   | LEU A 176 | 37.989 | -38.865 | -77.238 | 1.00 | 0.00 | A | O |
| ATOM | 523 | N   | LEU A 177 | 37.306 | -37.238 | -75.834 | 1.00 | 0.00 | A | N |
| ATOM | 524 | CA  | LEU A 177 | 37.811 | -37.902 | -74.665 | 1.00 | 0.00 | A | C |
| ATOM | 525 | CB  | LEU A 177 | 37.620 | -37.078 | -73.385 | 1.00 | 0.00 | A | C |
| ATOM | 526 | CG  | LEU A 177 | 38.517 | -35.828 | -73.358 | 1.00 | 0.00 | A | C |
| ATOM | 527 | CD1 | LEU A 177 | 38.318 | -35.024 | -72.076 | 1.00 | 0.00 | A | C |
| ATOM | 528 | CD2 | LEU A 177 | 39.992 | -36.189 | -73.590 | 1.00 | 0.00 | A | C |
| ATOM | 529 | C   | LEU A 177 | 37.135 | -39.223 | -74.492 | 1.00 | 0.00 | A | C |
| ATOM | 530 | O   | LEU A 177 | 37.785 | -40.228 | -74.209 | 1.00 | 0.00 | A | O |
| ATOM | 531 | N   | LEU A 178 | 35.805 | -39.255 | -74.672 | 1.00 | 0.00 | A | N |
| ATOM | 532 | CA  | LEU A 178 | 35.029 | -40.452 | -74.531 | 1.00 | 0.00 | A | C |
| ATOM | 533 | CB  | LEU A 178 | 33.550 | -40.154 | -74.792 | 1.00 | 0.00 | A | C |
| ATOM | 534 | CG  | LEU A 178 | 32.962 | -39.150 | -73.788 | 1.00 | 0.00 | A | C |
| ATOM | 535 | CD1 | LEU A 178 | 31.565 | -38.687 | -74.219 | 1.00 | 0.00 | A | C |
| ATOM | 536 | CD2 | LEU A 178 | 32.970 | -39.723 | -72.360 | 1.00 | 0.00 | A | C |
| ATOM | 537 | C   | LEU A 178 | 35.471 | -41.436 | -75.572 | 1.00 | 0.00 | A | C |
| ATOM | 538 | O   | LEU A 178 | 35.694 | -42.613 | -75.288 | 1.00 | 0.00 | A | O |
| ATOM | 539 | N   | GLU A 179 | 35.663 | -40.952 | -76.811 | 1.00 | 0.00 | A | N |
| ATOM | 540 | CA  | GLU A 179 | 35.996 | -41.796 | -77.923 | 1.00 | 0.00 | A | C |
| ATOM | 541 | CB  | GLU A 179 | 36.291 | -40.972 | -79.186 | 1.00 | 0.00 | A | C |
| ATOM | 542 | CG  | GLU A 179 | 36.696 | -41.805 | -80.402 | 1.00 | 0.00 | A | C |
| ATOM | 543 | CD  | GLU A 179 | 37.148 | -40.841 | -81.491 | 1.00 | 0.00 | A | C |
| ATOM | 544 | OE1 | GLU A 179 | 36.499 | -39.771 | -81.644 | 1.00 | 0.00 | A | O |
| ATOM | 545 | OE2 | GLU A 179 | 38.155 | -41.157 | -82.176 | 1.00 | 0.00 | A | O |
| ATOM | 546 | C   | GLU A 179 | 37.250 | -42.543 | -77.597 | 1.00 | 0.00 | A | C |
| ATOM | 547 | O   | GLU A 179 | 37.360 | -43.740 | -77.854 | 1.00 | 0.00 | A | O |
| ATOM | 548 | N   | ILE A 180 | 38.233 | -41.843 | -77.003 | 1.00 | 0.00 | A | N |
| ATOM | 549 | CA  | ILE A 180 | 39.488 | -42.451 | -76.685 | 1.00 | 0.00 | A | C |
| ATOM | 550 | CB  | ILE A 180 | 40.494 | -41.491 | -76.123 | 1.00 | 0.00 | A | C |

|      |     |               |        |         |         |      |      |   |   |
|------|-----|---------------|--------|---------|---------|------|------|---|---|
| ATOM | 551 | CG2 ILE A 180 | 41.705 | -42.303 | -75.635 | 1.00 | 0.00 | A | C |
| ATOM | 552 | CG1 ILE A 180 | 40.854 | -40.435 | -77.179 | 1.00 | 0.00 | A | C |
| ATOM | 553 | CD ILE A 180  | 41.711 | -39.295 | -76.638 | 1.00 | 0.00 | A | C |
| ATOM | 554 | C ILE A 180   | 39.276 | -43.523 | -75.667 | 1.00 | 0.00 | A | C |
| ATOM | 555 | O ILE A 180   | 39.928 | -44.565 | -75.712 | 1.00 | 0.00 | A | O |
| ATOM | 556 | N ALA A 181   | 38.367 | -43.274 | -74.709 | 1.00 | 0.00 | A | N |
| ATOM | 557 | CA ALA A 181  | 38.119 | -44.167 | -73.620 | 1.00 | 0.00 | A | C |
| ATOM | 558 | CB ALA A 181  | 37.077 | -43.628 | -72.624 | 1.00 | 0.00 | A | C |
| ATOM | 559 | C ALA A 181   | 37.613 | -45.480 | -74.109 | 1.00 | 0.00 | A | C |
| ATOM | 560 | O ALA A 181   | 37.957 | -46.494 | -73.520 | 1.00 | 0.00 | A | O |
| ATOM | 561 | N ARG A 182   | 36.740 | -45.512 | -75.133 | 1.00 | 0.00 | A | N |
| ATOM | 562 | CA ARG A 182  | 36.202 | -46.754 | -75.628 | 1.00 | 0.00 | A | C |
| ATOM | 563 | CB ARG A 182  | 34.957 | -46.579 | -76.523 | 1.00 | 0.00 | A | C |
| ATOM | 564 | CG ARG A 182  | 35.174 | -45.698 | -77.752 | 1.00 | 0.00 | A | C |
| ATOM | 565 | CD ARG A 182  | 33.930 | -45.542 | -78.635 | 1.00 | 0.00 | A | C |
| ATOM | 566 | NE ARG A 182  | 32.898 | -44.775 | -77.878 | 1.00 | 0.00 | A | N |
| ATOM | 567 | CZ ARG A 182  | 31.809 | -45.421 | -77.368 | 1.00 | 0.00 | A | C |
| ATOM | 568 | NH1 ARG A 182 | 31.655 | -46.761 | -77.573 | 1.00 | 0.00 | A | N |
| ATOM | 569 | NH2 ARG A 182 | 30.866 | -44.729 | -76.665 | 1.00 | 0.00 | A | N |
| ATOM | 570 | C ARG A 182   | 37.235 | -47.554 | -76.363 | 1.00 | 0.00 | A | C |
| ATOM | 571 | O ARG A 182   | 37.256 | -48.782 | -76.278 | 1.00 | 0.00 | A | O |
| ATOM | 572 | N GLN A 183   | 38.129 | -46.883 | -77.113 | 1.00 | 0.00 | A | N |
| ATOM | 573 | CA GLN A 183  | 39.107 | -47.601 | -77.874 | 1.00 | 0.00 | A | C |
| ATOM | 574 | CB GLN A 183  | 39.963 | -46.685 | -78.770 | 1.00 | 0.00 | A | C |
| ATOM | 575 | CG GLN A 183  | 39.099 | -45.997 | -79.836 | 1.00 | 0.00 | A | C |
| ATOM | 576 | CD GLN A 183  | 39.984 | -45.293 | -80.849 | 1.00 | 0.00 | A | C |
| ATOM | 577 | OE1 GLN A 183 | 39.845 | -44.092 | -81.085 | 1.00 | 0.00 | A | O |
| ATOM | 578 | NE2 GLN A 183 | 40.899 | -46.068 | -81.491 | 1.00 | 0.00 | A | N |
| ATOM | 579 | C GLN A 183   | 39.955 | -48.358 | -76.901 | 1.00 | 0.00 | A | C |
| ATOM | 580 | O GLN A 183   | 40.468 | -49.435 | -77.206 | 1.00 | 0.00 | A | O |
| ATOM | 581 | N THR A 184   | 40.192 | -47.757 | -75.724 | 1.00 | 0.00 | A | N |
| ATOM | 582 | CA THR A 184  | 40.853 | -48.378 | -74.613 | 1.00 | 0.00 | A | C |
| ATOM | 583 | CB THR A 184  | 41.447 | -47.377 | -73.674 | 1.00 | 0.00 | A | C |
| ATOM | 584 | OG1 THR A 184 | 42.334 | -46.523 | -74.382 | 1.00 | 0.00 | A | O |
| ATOM | 585 | CG2 THR A 184 | 42.221 | -48.138 | -72.583 | 1.00 | 0.00 | A | C |
| ATOM | 586 | C THR A 184   | 39.872 | -49.233 | -73.856 | 1.00 | 0.00 | A | C |
| ATOM | 587 | O THR A 184   | 40.254 | -50.114 | -73.092 | 1.00 | 0.00 | A | O |
| ATOM | 588 | N ASP A 185   | 38.566 | -48.958 | -74.015 | 1.00 | 0.00 | A | N |

|      |     |     |           |        |         |         |      |      |   |   |
|------|-----|-----|-----------|--------|---------|---------|------|------|---|---|
| ATOM | 589 | CA  | ASP A 185 | 37.517 | -49.637 | -73.303 | 1.00 | 0.00 | A | C |
| ATOM | 590 | CB  | ASP A 185 | 37.624 | -51.169 | -73.404 | 1.00 | 0.00 | A | C |
| ATOM | 591 | CG  | ASP A 185 | 37.279 | -51.579 | -74.830 | 1.00 | 0.00 | A | C |
| ATOM | 592 | OD1 | ASP A 185 | 36.324 | -50.988 | -75.403 | 1.00 | 0.00 | A | O |
| ATOM | 593 | OD2 | ASP A 185 | 37.970 | -52.484 | -75.368 | 1.00 | 0.00 | A | O |
| ATOM | 594 | C   | ASP A 185 | 37.557 | -49.269 | -71.850 | 1.00 | 0.00 | A | C |
| ATOM | 595 | O   | ASP A 185 | 36.987 | -49.961 | -71.010 | 1.00 | 0.00 | A | O |
| ATOM | 596 | N   | SER A 186 | 38.210 | -48.139 | -71.522 | 1.00 | 0.00 | A | N |
| ATOM | 597 | CA  | SER A 186 | 38.187 | -47.572 | -70.203 | 1.00 | 0.00 | A | C |
| ATOM | 598 | CB  | SER A 186 | 39.239 | -46.467 | -70.012 | 1.00 | 0.00 | A | C |
| ATOM | 599 | OG  | SER A 186 | 40.544 | -47.010 | -70.158 | 1.00 | 0.00 | A | O |
| ATOM | 600 | C   | SER A 186 | 36.850 | -46.910 | -70.071 | 1.00 | 0.00 | A | C |
| ATOM | 601 | O   | SER A 186 | 36.519 | -46.334 | -69.034 | 1.00 | 0.00 | A | O |
| ATOM | 602 | N   | LEU A 187 | 36.020 | -47.040 | -71.118 | 1.00 | 0.00 | A | N |
| ATOM | 603 | CA  | LEU A 187 | 34.856 | -46.222 | -71.267 | 1.00 | 0.00 | A | C |
| ATOM | 604 | CB  | LEU A 187 | 34.039 | -46.534 | -72.532 | 1.00 | 0.00 | A | C |
| ATOM | 605 | CG  | LEU A 187 | 32.885 | -45.531 | -72.721 | 1.00 | 0.00 | A | C |
| ATOM | 606 | CD1 | LEU A 187 | 33.425 | -44.105 | -72.903 | 1.00 | 0.00 | A | C |
| ATOM | 607 | CD2 | LEU A 187 | 31.941 | -45.948 | -73.854 | 1.00 | 0.00 | A | C |
| ATOM | 608 | C   | LEU A 187 | 33.919 | -46.252 | -70.094 | 1.00 | 0.00 | A | C |
| ATOM | 609 | O   | LEU A 187 | 33.522 | -45.186 | -69.630 | 1.00 | 0.00 | A | O |
| ATOM | 610 | N   | LYS A 188 | 33.539 | -47.425 | -69.557 | 1.00 | 0.00 | A | N |
| ATOM | 611 | CA  | LYS A 188 | 32.547 | -47.404 | -68.508 | 1.00 | 0.00 | A | C |
| ATOM | 612 | CB  | LYS A 188 | 32.134 | -48.807 | -68.036 | 1.00 | 0.00 | A | C |
| ATOM | 613 | CG  | LYS A 188 | 31.123 | -48.758 | -66.891 | 1.00 | 0.00 | A | C |
| ATOM | 614 | CD  | LYS A 188 | 30.478 | -50.101 | -66.556 | 1.00 | 0.00 | A | C |
| ATOM | 615 | CE  | LYS A 188 | 29.120 | -50.312 | -67.222 | 1.00 | 0.00 | A | C |
| ATOM | 616 | NZ  | LYS A 188 | 28.429 | -51.454 | -66.586 | 1.00 | 0.00 | A | N |
| ATOM | 617 | C   | LYS A 188 | 33.031 | -46.679 | -67.285 | 1.00 | 0.00 | A | C |
| ATOM | 618 | O   | LYS A 188 | 32.353 | -45.778 | -66.785 | 1.00 | 0.00 | A | O |
| ATOM | 619 | N   | GLU A 189 | 34.226 | -47.044 | -66.782 | 1.00 | 0.00 | A | N |
| ATOM | 620 | CA  | GLU A 189 | 34.738 | -46.490 | -65.558 | 1.00 | 0.00 | A | C |
| ATOM | 621 | CB  | GLU A 189 | 36.000 | -47.203 | -65.019 | 1.00 | 0.00 | A | C |
| ATOM | 622 | CG  | GLU A 189 | 37.208 | -47.205 | -65.958 | 1.00 | 0.00 | A | C |
| ATOM | 623 | CD  | GLU A 189 | 37.248 | -48.547 | -66.676 | 1.00 | 0.00 | A | C |
| ATOM | 624 | OE1 | GLU A 189 | 36.268 | -48.862 | -67.404 | 1.00 | 0.00 | A | O |
| ATOM | 625 | OE2 | GLU A 189 | 38.258 | -49.279 | -66.505 | 1.00 | 0.00 | A | O |
| ATOM | 626 | C   | GLU A 189 | 35.069 | -45.045 | -65.747 | 1.00 | 0.00 | A | C |

|      |     |     |           |        |         |         |      |      |   |   |
|------|-----|-----|-----------|--------|---------|---------|------|------|---|---|
| ATOM | 627 | O   | GLU A 189 | 35.045 | -44.271 | -64.791 | 1.00 | 0.00 | A | O |
| ATOM | 628 | N   | LEU A 190 | 35.459 | -44.652 | -66.976 | 1.00 | 0.00 | A | N |
| ATOM | 629 | CA  | LEU A 190 | 35.819 | -43.286 | -67.225 | 1.00 | 0.00 | A | C |
| ATOM | 630 | CB  | LEU A 190 | 36.342 | -43.070 | -68.654 | 1.00 | 0.00 | A | C |
| ATOM | 631 | CG  | LEU A 190 | 36.716 | -41.605 | -68.944 | 1.00 | 0.00 | A | C |
| ATOM | 632 | CD1 | LEU A 190 | 37.883 | -41.134 | -68.066 | 1.00 | 0.00 | A | C |
| ATOM | 633 | CD2 | LEU A 190 | 36.968 | -41.384 | -70.443 | 1.00 | 0.00 | A | C |
| ATOM | 634 | C   | LEU A 190 | 34.635 | -42.383 | -67.054 | 1.00 | 0.00 | A | C |
| ATOM | 635 | O   | LEU A 190 | 34.689 | -41.391 | -66.327 | 1.00 | 0.00 | A | O |
| ATOM | 636 | N   | VAL A 191 | 33.516 | -42.733 | -67.708 | 1.00 | 0.00 | A | N |
| ATOM | 637 | CA  | VAL A 191 | 32.309 | -41.961 | -67.677 | 1.00 | 0.00 | A | C |
| ATOM | 638 | CB  | VAL A 191 | 31.273 | -42.468 | -68.643 | 1.00 | 0.00 | A | C |
| ATOM | 639 | CG1 | VAL A 191 | 29.925 | -41.805 | -68.331 | 1.00 | 0.00 | A | C |
| ATOM | 640 | CG2 | VAL A 191 | 31.753 | -42.141 | -70.068 | 1.00 | 0.00 | A | C |
| ATOM | 641 | C   | VAL A 191 | 31.741 | -41.968 | -66.287 | 1.00 | 0.00 | A | C |
| ATOM | 642 | O   | VAL A 191 | 30.993 | -41.060 | -65.924 | 1.00 | 0.00 | A | O |
| ATOM | 643 | N   | ASN A 192 | 32.028 | -43.009 | -65.479 | 1.00 | 0.00 | A | N |
| ATOM | 644 | CA  | ASN A 192 | 31.408 | -43.028 | -64.181 | 1.00 | 0.00 | A | C |
| ATOM | 645 | CB  | ASN A 192 | 30.760 | -44.382 | -63.854 | 1.00 | 0.00 | A | C |
| ATOM | 646 | CG  | ASN A 192 | 29.572 | -44.590 | -64.781 | 1.00 | 0.00 | A | C |
| ATOM | 647 | OD1 | ASN A 192 | 28.867 | -43.650 | -65.143 | 1.00 | 0.00 | A | O |
| ATOM | 648 | ND2 | ASN A 192 | 29.344 | -45.870 | -65.180 | 1.00 | 0.00 | A | N |
| ATOM | 649 | C   | ASN A 192 | 32.368 | -42.754 | -63.051 | 1.00 | 0.00 | A | C |
| ATOM | 650 | O   | ASN A 192 | 32.107 | -43.181 | -61.927 | 1.00 | 0.00 | A | O |
| ATOM | 651 | N   | ALA A 193 | 33.467 | -42.004 | -63.270 | 1.00 | 0.00 | A | N |
| ATOM | 652 | CA  | ALA A 193 | 34.352 | -41.734 | -62.163 | 1.00 | 0.00 | A | C |
| ATOM | 653 | CB  | ALA A 193 | 35.733 | -41.210 | -62.592 | 1.00 | 0.00 | A | C |
| ATOM | 654 | C   | ALA A 193 | 33.713 | -40.679 | -61.308 | 1.00 | 0.00 | A | C |
| ATOM | 655 | O   | ALA A 193 | 33.034 | -39.794 | -61.821 | 1.00 | 0.00 | A | O |
| ATOM | 656 | N   | SER A 194 | 33.940 | -40.726 | -59.975 | 1.00 | 0.00 | A | N |
| ATOM | 657 | CA  | SER A 194 | 33.280 | -39.789 | -59.103 | 1.00 | 0.00 | A | C |
| ATOM | 658 | CB  | SER A 194 | 32.225 | -40.453 | -58.199 | 1.00 | 0.00 | A | C |
| ATOM | 659 | OG  | SER A 194 | 32.829 | -41.443 | -57.379 | 1.00 | 0.00 | A | O |
| ATOM | 660 | C   | SER A 194 | 34.267 | -39.080 | -58.217 | 1.00 | 0.00 | A | C |
| ATOM | 661 | O   | SER A 194 | 35.407 | -39.511 | -58.046 | 1.00 | 0.00 | A | O |
| ATOM | 662 | N   | TYR A 195 | 33.829 | -37.934 | -57.644 | 1.00 | 0.00 | A | N |
| ATOM | 663 | CA  | TYR A 195 | 34.628 | -37.122 | -56.758 | 1.00 | 0.00 | A | C |
| ATOM | 664 | CB  | TYR A 195 | 34.018 | -35.738 | -56.450 | 1.00 | 0.00 | A | C |

|      |     |     |     |   |     |        |         |         |      |      |   |   |
|------|-----|-----|-----|---|-----|--------|---------|---------|------|------|---|---|
| ATOM | 665 | CG  | TYR | A | 195 | 34.182 | -34.822 | -57.615 | 1.00 | 0.00 | A | C |
| ATOM | 666 | CD1 | TYR | A | 195 | 33.341 | -34.874 | -58.702 | 1.00 | 0.00 | A | C |
| ATOM | 667 | CE1 | TYR | A | 195 | 33.516 | -34.011 | -59.759 | 1.00 | 0.00 | A | C |
| ATOM | 668 | CZ  | TYR | A | 195 | 34.530 | -33.082 | -59.734 | 1.00 | 0.00 | A | C |
| ATOM | 669 | OH  | TYR | A | 195 | 34.712 | -32.195 | -60.817 | 1.00 | 0.00 | A | O |
| ATOM | 670 | CD2 | TYR | A | 195 | 35.189 | -33.883 | -57.598 | 1.00 | 0.00 | A | C |
| ATOM | 671 | CE2 | TYR | A | 195 | 35.367 | -33.019 | -58.650 | 1.00 | 0.00 | A | C |
| ATOM | 672 | C   | TYR | A | 195 | 34.765 | -37.818 | -55.432 | 1.00 | 0.00 | A | C |
| ATOM | 673 | O   | TYR | A | 195 | 33.815 | -38.404 | -54.924 | 1.00 | 0.00 | A | O |
| ATOM | 674 | N   | THR | A | 196 | 36.006 | -37.874 | -54.919 | 1.00 | 0.00 | A | N |
| ATOM | 675 | CA  | THR | A | 196 | 36.405 | -38.439 | -53.652 | 1.00 | 0.00 | A | C |
| ATOM | 676 | CB  | THR | A | 196 | 37.799 | -38.983 | -53.708 | 1.00 | 0.00 | A | C |
| ATOM | 677 | OG1 | THR | A | 196 | 38.727 | -37.937 | -53.954 | 1.00 | 0.00 | A | O |
| ATOM | 678 | CG2 | THR | A | 196 | 37.863 | -40.014 | -54.847 | 1.00 | 0.00 | A | C |
| ATOM | 679 | C   | THR | A | 196 | 36.326 | -37.502 | -52.470 | 1.00 | 0.00 | A | C |
| ATOM | 680 | O   | THR | A | 196 | 36.154 | -37.958 | -51.341 | 1.00 | 0.00 | A | O |
| ATOM | 681 | N   | ASP | A | 197 | 36.504 | -36.180 | -52.676 | 1.00 | 0.00 | A | N |
| ATOM | 682 | CA  | ASP | A | 197 | 36.595 | -35.266 | -51.566 | 1.00 | 0.00 | A | C |
| ATOM | 683 | CB  | ASP | A | 197 | 36.999 | -33.836 | -51.968 | 1.00 | 0.00 | A | C |
| ATOM | 684 | CG  | ASP | A | 197 | 35.927 | -33.267 | -52.886 | 1.00 | 0.00 | A | C |
| ATOM | 685 | OD1 | ASP | A | 197 | 35.344 | -34.052 | -53.680 | 1.00 | 0.00 | A | O |
| ATOM | 686 | OD2 | ASP | A | 197 | 35.677 | -32.035 | -52.800 | 1.00 | 0.00 | A | O |
| ATOM | 687 | C   | ASP | A | 197 | 35.273 | -35.204 | -50.869 | 1.00 | 0.00 | A | C |
| ATOM | 688 | O   | ASP | A | 197 | 34.236 | -35.541 | -51.433 | 1.00 | 0.00 | A | O |
| ATOM | 689 | N   | SER | A | 198 | 35.282 | -34.765 | -49.596 | 1.00 | 0.00 | A | N |
| ATOM | 690 | CA  | SER | A | 198 | 34.081 | -34.764 | -48.814 | 1.00 | 0.00 | A | C |
| ATOM | 691 | CB  | SER | A | 198 | 34.309 | -34.320 | -47.358 | 1.00 | 0.00 | A | C |
| ATOM | 692 | OG  | SER | A | 198 | 34.725 | -32.965 | -47.315 | 1.00 | 0.00 | A | O |
| ATOM | 693 | C   | SER | A | 198 | 33.071 | -33.834 | -49.411 | 1.00 | 0.00 | A | C |
| ATOM | 694 | O   | SER | A | 198 | 31.867 | -34.045 | -49.265 | 1.00 | 0.00 | A | O |
| ATOM | 695 | N   | TYR | A | 199 | 33.522 | -32.751 | -50.067 | 1.00 | 0.00 | A | N |
| ATOM | 696 | CA  | TYR | A | 199 | 32.555 | -31.798 | -50.539 | 1.00 | 0.00 | A | C |
| ATOM | 697 | CB  | TYR | A | 199 | 33.273 | -30.526 | -51.033 | 1.00 | 0.00 | A | C |
| ATOM | 698 | CG  | TYR | A | 199 | 32.306 | -29.413 | -51.252 | 1.00 | 0.00 | A | C |
| ATOM | 699 | CD1 | TYR | A | 199 | 31.687 | -28.824 | -50.175 | 1.00 | 0.00 | A | C |
| ATOM | 700 | CE1 | TYR | A | 199 | 30.802 | -27.788 | -50.354 | 1.00 | 0.00 | A | C |
| ATOM | 701 | CZ  | TYR | A | 199 | 30.536 | -27.319 | -51.615 | 1.00 | 0.00 | A | C |
| ATOM | 702 | OH  | TYR | A | 199 | 29.630 | -26.254 | -51.786 | 1.00 | 0.00 | A | O |

|      |     |               |        |         |         |      |      |   |   |
|------|-----|---------------|--------|---------|---------|------|------|---|---|
| ATOM | 703 | CD2 TYR A 199 | 32.049 | -28.927 | -52.514 | 1.00 | 0.00 | A | C |
| ATOM | 704 | CE2 TYR A 199 | 31.164 | -27.887 | -52.700 | 1.00 | 0.00 | A | C |
| ATOM | 705 | C TYR A 199   | 31.692 | -32.336 | -51.663 | 1.00 | 0.00 | A | C |
| ATOM | 706 | O TYR A 199   | 30.477 | -32.472 | -51.521 | 1.00 | 0.00 | A | O |
| ATOM | 707 | N TYR A 200   | 32.325 | -32.677 | -52.803 | 1.00 | 0.00 | A | N |
| ATOM | 708 | CA TYR A 200  | 31.728 | -33.130 | -54.041 | 1.00 | 0.00 | A | C |
| ATOM | 709 | CB TYR A 200  | 32.511 | -32.737 | -55.304 | 1.00 | 0.00 | A | C |
| ATOM | 710 | CG TYR A 200  | 33.211 | -31.471 | -54.946 | 1.00 | 0.00 | A | C |
| ATOM | 711 | CD1 TYR A 200 | 32.486 | -30.314 | -54.769 | 1.00 | 0.00 | A | C |
| ATOM | 712 | CE1 TYR A 200 | 33.110 | -29.135 | -54.435 | 1.00 | 0.00 | A | C |
| ATOM | 713 | CZ TYR A 200  | 34.475 | -29.105 | -54.284 | 1.00 | 0.00 | A | C |
| ATOM | 714 | OH TYR A 200  | 35.123 | -27.900 | -53.942 | 1.00 | 0.00 | A | O |
| ATOM | 715 | CD2 TYR A 200 | 34.578 | -31.429 | -54.803 | 1.00 | 0.00 | A | C |
| ATOM | 716 | CE2 TYR A 200 | 35.209 | -30.254 | -54.470 | 1.00 | 0.00 | A | C |
| ATOM | 717 | C TYR A 200   | 31.392 | -34.584 | -54.103 | 1.00 | 0.00 | A | C |
| ATOM | 718 | O TYR A 200   | 30.742 | -35.013 | -55.058 | 1.00 | 0.00 | A | O |
| ATOM | 719 | N LYS A 201   | 31.934 | -35.382 | -53.161 | 1.00 | 0.00 | A | N |
| ATOM | 720 | CA LYS A 201  | 31.956 | -36.822 | -53.203 | 1.00 | 0.00 | A | C |
| ATOM | 721 | CB LYS A 201  | 32.196 | -37.501 | -51.838 | 1.00 | 0.00 | A | C |
| ATOM | 722 | CG LYS A 201  | 31.120 | -37.231 | -50.790 | 1.00 | 0.00 | A | C |
| ATOM | 723 | CD LYS A 201  | 31.188 | -38.186 | -49.597 | 1.00 | 0.00 | A | C |
| ATOM | 724 | CE LYS A 201  | 32.594 | -38.713 | -49.314 | 1.00 | 0.00 | A | C |
| ATOM | 725 | NZ LYS A 201  | 33.463 | -37.617 | -48.829 | 1.00 | 0.00 | A | N |
| ATOM | 726 | C LYS A 201   | 30.771 | -37.454 | -53.869 | 1.00 | 0.00 | A | C |
| ATOM | 727 | O LYS A 201   | 29.612 | -37.140 | -53.606 | 1.00 | 0.00 | A | O |
| ATOM | 728 | N GLY A 202   | 31.091 | -38.351 | -54.823 | 1.00 | 0.00 | A | N |
| ATOM | 729 | CA GLY A 202  | 30.128 | -39.146 | -55.523 | 1.00 | 0.00 | A | C |
| ATOM | 730 | C GLY A 202   | 29.601 | -38.429 | -56.731 | 1.00 | 0.00 | A | C |
| ATOM | 731 | O GLY A 202   | 28.769 | -38.981 | -57.452 | 1.00 | 0.00 | A | O |
| ATOM | 732 | N GLN A 203   | 30.056 | -37.188 | -56.998 | 1.00 | 0.00 | A | N |
| ATOM | 733 | CA GLN A 203  | 29.559 | -36.503 | -58.160 | 1.00 | 0.00 | A | C |
| ATOM | 734 | CB GLN A 203  | 29.772 | -34.977 | -58.134 | 1.00 | 0.00 | A | C |
| ATOM | 735 | CG GLN A 203  | 29.222 | -34.263 | -59.374 | 1.00 | 0.00 | A | C |
| ATOM | 736 | CD GLN A 203  | 29.413 | -32.763 | -59.189 | 1.00 | 0.00 | A | C |
| ATOM | 737 | OE1 GLN A 203 | 30.518 | -32.285 | -58.933 | 1.00 | 0.00 | A | O |
| ATOM | 738 | NE2 GLN A 203 | 28.300 | -31.994 | -59.319 | 1.00 | 0.00 | A | N |
| ATOM | 739 | C GLN A 203   | 30.234 | -37.053 | -59.377 | 1.00 | 0.00 | A | C |
| ATOM | 740 | O GLN A 203   | 31.445 | -37.283 | -59.393 | 1.00 | 0.00 | A | O |



|      |     |     |     |   |     |        |         |         |      |      |   |   |
|------|-----|-----|-----|---|-----|--------|---------|---------|------|------|---|---|
| ATOM | 741 | N   | THR | A | 204 | 29.432 | -37.264 | -60.442 | 1.00 | 0.00 | A | N |
| ATOM | 742 | CA  | THR | A | 204 | 29.876 | -37.802 | -61.697 | 1.00 | 0.00 | A | C |
| ATOM | 743 | CB  | THR | A | 204 | 29.129 | -39.035 | -62.110 | 1.00 | 0.00 | A | C |
| ATOM | 744 | OG1 | THR | A | 204 | 27.751 | -38.732 | -62.271 | 1.00 | 0.00 | A | O |
| ATOM | 745 | CG2 | THR | A | 204 | 29.309 | -40.118 | -61.034 | 1.00 | 0.00 | A | C |
| ATOM | 746 | C   | THR | A | 204 | 29.585 | -36.770 | -62.739 | 1.00 | 0.00 | A | C |
| ATOM | 747 | O   | THR | A | 204 | 28.941 | -35.759 | -62.466 | 1.00 | 0.00 | A | O |
| ATOM | 748 | N   | ALA | A | 205 | 30.062 | -37.007 | -63.977 | 1.00 | 0.00 | A | N |
| ATOM | 749 | CA  | ALA | A | 205 | 29.866 | -36.081 | -65.055 | 1.00 | 0.00 | A | C |
| ATOM | 750 | CB  | ALA | A | 205 | 30.498 | -36.561 | -66.372 | 1.00 | 0.00 | A | C |
| ATOM | 751 | C   | ALA | A | 205 | 28.396 | -35.903 | -65.298 | 1.00 | 0.00 | A | C |
| ATOM | 752 | O   | ALA | A | 205 | 27.935 | -34.794 | -65.556 | 1.00 | 0.00 | A | O |
| ATOM | 753 | N   | LEU | A | 206 | 27.604 | -36.987 | -65.202 | 1.00 | 0.00 | A | N |
| ATOM | 754 | CA  | LEU | A | 206 | 26.196 | -36.894 | -65.477 | 1.00 | 0.00 | A | C |
| ATOM | 755 | CB  | LEU | A | 206 | 25.466 | -38.246 | -65.368 | 1.00 | 0.00 | A | C |
| ATOM | 756 | CG  | LEU | A | 206 | 23.970 | -38.163 | -65.724 | 1.00 | 0.00 | A | C |
| ATOM | 757 | CD1 | LEU | A | 206 | 23.780 | -37.643 | -67.157 | 1.00 | 0.00 | A | C |
| ATOM | 758 | CD2 | LEU | A | 206 | 23.261 | -39.509 | -65.502 | 1.00 | 0.00 | A | C |
| ATOM | 759 | C   | LEU | A | 206 | 25.557 | -35.927 | -64.522 | 1.00 | 0.00 | A | C |
| ATOM | 760 | O   | LEU | A | 206 | 24.632 | -35.206 | -64.892 | 1.00 | 0.00 | A | O |
| ATOM | 761 | N   | HSD | A | 207 | 26.025 | -35.881 | -63.261 | 1.00 | 0.00 | A | N |
| ATOM | 762 | CA  | HSD | A | 207 | 25.417 | -34.970 | -62.329 | 1.00 | 0.00 | A | C |
| ATOM | 763 | CB  | HSD | A | 207 | 26.068 | -34.989 | -60.932 | 1.00 | 0.00 | A | C |
| ATOM | 764 | ND1 | HSD | A | 207 | 26.646 | -37.345 | -60.169 | 1.00 | 0.00 | A | N |
| ATOM | 765 | CG  | HSD | A | 207 | 25.819 | -36.243 | -60.154 | 1.00 | 0.00 | A | C |
| ATOM | 766 | CE1 | HSD | A | 207 | 26.095 | -38.261 | -59.333 | 1.00 | 0.00 | A | C |
| ATOM | 767 | NE2 | HSD | A | 207 | 24.976 | -37.825 | -58.783 | 1.00 | 0.00 | A | N |
| ATOM | 768 | CD2 | HSD | A | 207 | 24.804 | -36.555 | -59.302 | 1.00 | 0.00 | A | C |
| ATOM | 769 | C   | HSD | A | 207 | 25.591 | -33.577 | -62.852 | 1.00 | 0.00 | A | C |
| ATOM | 770 | O   | HSD | A | 207 | 24.648 | -32.788 | -62.878 | 1.00 | 0.00 | A | O |
| ATOM | 771 | N   | ILE | A | 208 | 26.812 | -33.251 | -63.318 | 1.00 | 0.00 | A | N |
| ATOM | 772 | CA  | ILE | A | 208 | 27.153 | -31.930 | -63.756 | 1.00 | 0.00 | A | C |
| ATOM | 773 | CB  | ILE | A | 208 | 28.601 | -31.814 | -64.148 | 1.00 | 0.00 | A | C |
| ATOM | 774 | CG2 | ILE | A | 208 | 28.817 | -30.449 | -64.821 | 1.00 | 0.00 | A | C |
| ATOM | 775 | CG1 | ILE | A | 208 | 29.505 | -32.050 | -62.921 | 1.00 | 0.00 | A | C |
| ATOM | 776 | CD  | ILE | A | 208 | 30.986 | -32.215 | -63.268 | 1.00 | 0.00 | A | C |
| ATOM | 777 | C   | ILE | A | 208 | 26.317 | -31.522 | -64.934 | 1.00 | 0.00 | A | C |
| ATOM | 778 | O   | ILE | A | 208 | 25.867 | -30.378 | -65.008 | 1.00 | 0.00 | A | O |

|      |     |     |           |        |         |         |      |      |   |   |
|------|-----|-----|-----------|--------|---------|---------|------|------|---|---|
| ATOM | 779 | N   | ALA A 209 | 26.081 | -32.443 | -65.885 | 1.00 | 0.00 | A | N |
| ATOM | 780 | CA  | ALA A 209 | 25.350 | -32.116 | -67.080 | 1.00 | 0.00 | A | C |
| ATOM | 781 | CB  | ALA A 209 | 25.207 | -33.314 | -68.033 | 1.00 | 0.00 | A | C |
| ATOM | 782 | C   | ALA A 209 | 23.974 | -31.670 | -66.709 | 1.00 | 0.00 | A | C |
| ATOM | 783 | O   | ALA A 209 | 23.429 | -30.750 | -67.318 | 1.00 | 0.00 | A | O |
| ATOM | 784 | N   | ILE A 210 | 23.361 | -32.351 | -65.728 | 1.00 | 0.00 | A | N |
| ATOM | 785 | CA  | ILE A 210 | 22.037 | -32.011 | -65.288 | 1.00 | 0.00 | A | C |
| ATOM | 786 | CB  | ILE A 210 | 21.459 | -33.038 | -64.359 | 1.00 | 0.00 | A | C |
| ATOM | 787 | CG2 | ILE A 210 | 20.107 | -32.521 | -63.839 | 1.00 | 0.00 | A | C |
| ATOM | 788 | CG1 | ILE A 210 | 21.357 | -34.392 | -65.078 | 1.00 | 0.00 | A | C |
| ATOM | 789 | CD  | ILE A 210 | 21.047 | -35.555 | -64.142 | 1.00 | 0.00 | A | C |
| ATOM | 790 | C   | ILE A 210 | 22.058 | -30.694 | -64.578 | 1.00 | 0.00 | A | C |
| ATOM | 791 | O   | ILE A 210 | 21.222 | -29.829 | -64.829 | 1.00 | 0.00 | A | O |
| ATOM | 792 | N   | GLU A 211 | 23.049 | -30.491 | -63.693 | 1.00 | 0.00 | A | N |
| ATOM | 793 | CA  | GLU A 211 | 23.121 | -29.277 | -62.934 | 1.00 | 0.00 | A | C |
| ATOM | 794 | CB  | GLU A 211 | 24.343 | -29.260 | -62.005 | 1.00 | 0.00 | A | C |
| ATOM | 795 | CG  | GLU A 211 | 24.169 | -30.248 | -60.847 | 1.00 | 0.00 | A | C |
| ATOM | 796 | CD  | GLU A 211 | 25.505 | -30.481 | -60.167 | 1.00 | 0.00 | A | C |
| ATOM | 797 | OE1 | GLU A 211 | 26.555 | -30.284 | -60.835 | 1.00 | 0.00 | A | O |
| ATOM | 798 | OE2 | GLU A 211 | 25.497 | -30.874 | -58.970 | 1.00 | 0.00 | A | O |
| ATOM | 799 | C   | GLU A 211 | 23.185 | -28.145 | -63.913 | 1.00 | 0.00 | A | C |
| ATOM | 800 | O   | GLU A 211 | 22.645 | -27.067 | -63.677 | 1.00 | 0.00 | A | O |
| ATOM | 801 | N   | ARG A 212 | 23.867 | -28.383 | -65.042 | 1.00 | 0.00 | A | N |
| ATOM | 802 | CA  | ARG A 212 | 24.041 | -27.463 | -66.130 | 1.00 | 0.00 | A | C |
| ATOM | 803 | CB  | ARG A 212 | 25.160 | -27.904 | -67.089 | 1.00 | 0.00 | A | C |
| ATOM | 804 | CG  | ARG A 212 | 26.526 | -27.941 | -66.399 | 1.00 | 0.00 | A | C |
| ATOM | 805 | CD  | ARG A 212 | 26.803 | -26.691 | -65.560 | 1.00 | 0.00 | A | C |
| ATOM | 806 | NE  | ARG A 212 | 28.172 | -26.814 | -64.988 | 1.00 | 0.00 | A | N |
| ATOM | 807 | CZ  | ARG A 212 | 28.376 | -26.607 | -63.656 | 1.00 | 0.00 | A | C |
| ATOM | 808 | NH1 | ARG A 212 | 27.314 | -26.346 | -62.837 | 1.00 | 0.00 | A | N |
| ATOM | 809 | NH2 | ARG A 212 | 29.640 | -26.657 | -63.142 | 1.00 | 0.00 | A | N |
| ATOM | 810 | C   | ARG A 212 | 22.773 | -27.289 | -66.914 | 1.00 | 0.00 | A | C |
| ATOM | 811 | O   | ARG A 212 | 22.628 | -26.305 | -67.639 | 1.00 | 0.00 | A | O |
| ATOM | 812 | N   | ARG A 213 | 21.835 | -28.253 | -66.830 | 1.00 | 0.00 | A | N |
| ATOM | 813 | CA  | ARG A 213 | 20.616 | -28.190 | -67.589 | 1.00 | 0.00 | A | C |
| ATOM | 814 | CB  | ARG A 213 | 19.884 | -26.848 | -67.453 | 1.00 | 0.00 | A | C |
| ATOM | 815 | CG  | ARG A 213 | 19.395 | -26.565 | -66.039 | 1.00 | 0.00 | A | C |
| ATOM | 816 | CD  | ARG A 213 | 18.651 | -25.238 | -65.907 | 1.00 | 0.00 | A | C |

|      |     |     |     |   |     |        |         |         |      |      |   |   |
|------|-----|-----|-----|---|-----|--------|---------|---------|------|------|---|---|
| ATOM | 817 | NE  | ARG | A | 213 | 18.200 | -25.145 | -64.494 | 1.00 | 0.00 | A | N |
| ATOM | 818 | CZ  | ARG | A | 213 | 17.014 | -25.705 | -64.113 | 1.00 | 0.00 | A | C |
| ATOM | 819 | NH1 | ARG | A | 213 | 16.196 | -26.299 | -65.030 | 1.00 | 0.00 | A | N |
| ATOM | 820 | NH2 | ARG | A | 213 | 16.660 | -25.677 | -62.799 | 1.00 | 0.00 | A | N |
| ATOM | 821 | C   | ARG | A | 213 | 20.927 | -28.356 | -69.042 | 1.00 | 0.00 | A | C |
| ATOM | 822 | O   | ARG | A | 213 | 20.346 | -27.671 | -69.883 | 1.00 | 0.00 | A | O |
| ATOM | 823 | N   | ASN | A | 214 | 21.866 | -29.263 | -69.388 | 1.00 | 0.00 | A | N |
| ATOM | 824 | CA  | ASN | A | 214 | 22.098 | -29.443 | -70.792 | 1.00 | 0.00 | A | C |
| ATOM | 825 | CB  | ASN | A | 214 | 23.512 | -29.059 | -71.298 | 1.00 | 0.00 | A | C |
| ATOM | 826 | CG  | ASN | A | 214 | 24.626 | -29.876 | -70.666 | 1.00 | 0.00 | A | C |
| ATOM | 827 | OD1 | ASN | A | 214 | 24.430 | -30.834 | -69.922 | 1.00 | 0.00 | A | O |
| ATOM | 828 | ND2 | ASN | A | 214 | 25.881 | -29.450 | -70.969 | 1.00 | 0.00 | A | N |
| ATOM | 829 | C   | ASN | A | 214 | 21.707 | -30.826 | -71.211 | 1.00 | 0.00 | A | C |
| ATOM | 830 | O   | ASN | A | 214 | 22.316 | -31.835 | -70.856 | 1.00 | 0.00 | A | O |
| ATOM | 831 | N   | MET | A | 215 | 20.636 | -30.893 | -72.016 | 1.00 | 0.00 | A | N |
| ATOM | 832 | CA  | MET | A | 215 | 20.077 | -32.142 | -72.439 | 1.00 | 0.00 | A | C |
| ATOM | 833 | CB  | MET | A | 215 | 18.808 | -31.933 | -73.282 | 1.00 | 0.00 | A | C |
| ATOM | 834 | CG  | MET | A | 215 | 17.716 | -32.991 | -73.079 | 1.00 | 0.00 | A | C |
| ATOM | 835 | SD  | MET | A | 215 | 18.162 | -34.712 | -73.441 | 1.00 | 0.00 | A | S |
| ATOM | 836 | CE  | MET | A | 215 | 19.079 | -35.011 | -71.904 | 1.00 | 0.00 | A | C |
| ATOM | 837 | C   | MET | A | 215 | 21.099 | -32.847 | -73.276 | 1.00 | 0.00 | A | C |
| ATOM | 838 | O   | MET | A | 215 | 21.334 | -34.043 | -73.118 | 1.00 | 0.00 | A | O |
| ATOM | 839 | N   | ALA | A | 216 | 21.788 | -32.096 | -74.151 | 1.00 | 0.00 | A | N |
| ATOM | 840 | CA  | ALA | A | 216 | 22.685 | -32.717 | -75.078 | 1.00 | 0.00 | A | C |
| ATOM | 841 | CB  | ALA | A | 216 | 23.422 | -31.694 | -75.950 | 1.00 | 0.00 | A | C |
| ATOM | 842 | C   | ALA | A | 216 | 23.727 | -33.494 | -74.333 | 1.00 | 0.00 | A | C |
| ATOM | 843 | O   | ALA | A | 216 | 24.037 | -34.622 | -74.711 | 1.00 | 0.00 | A | O |
| ATOM | 844 | N   | LEU | A | 217 | 24.302 | -32.914 | -73.264 | 1.00 | 0.00 | A | N |
| ATOM | 845 | CA  | LEU | A | 217 | 25.307 | -33.625 | -72.525 | 1.00 | 0.00 | A | C |
| ATOM | 846 | CB  | LEU | A | 217 | 26.131 | -32.776 | -71.540 | 1.00 | 0.00 | A | C |
| ATOM | 847 | CG  | LEU | A | 217 | 27.099 | -31.798 | -72.229 | 1.00 | 0.00 | A | C |
| ATOM | 848 | CD1 | LEU | A | 217 | 28.117 | -31.225 | -71.229 | 1.00 | 0.00 | A | C |
| ATOM | 849 | CD2 | LEU | A | 217 | 27.765 | -32.440 | -73.457 | 1.00 | 0.00 | A | C |
| ATOM | 850 | C   | LEU | A | 217 | 24.709 | -34.760 | -71.764 | 1.00 | 0.00 | A | C |
| ATOM | 851 | O   | LEU | A | 217 | 25.345 | -35.798 | -71.596 | 1.00 | 0.00 | A | O |
| ATOM | 852 | N   | VAL | A | 218 | 23.483 | -34.590 | -71.232 | 1.00 | 0.00 | A | N |
| ATOM | 853 | CA  | VAL | A | 218 | 22.896 | -35.685 | -70.517 | 1.00 | 0.00 | A | C |
| ATOM | 854 | CB  | VAL | A | 218 | 21.524 | -35.369 | -69.993 | 1.00 | 0.00 | A | C |

|      |     |               |        |         |         |      |      |   |   |
|------|-----|---------------|--------|---------|---------|------|------|---|---|
| ATOM | 855 | CG1 VAL A 218 | 20.900 | -36.658 | -69.431 | 1.00 | 0.00 | A | C |
| ATOM | 856 | CG2 VAL A 218 | 21.645 | -34.237 | -68.960 | 1.00 | 0.00 | A | C |
| ATOM | 857 | C VAL A 218   | 22.760 | -36.813 | -71.489 | 1.00 | 0.00 | A | C |
| ATOM | 858 | O VAL A 218   | 23.192 | -37.935 | -71.228 | 1.00 | 0.00 | A | O |
| ATOM | 859 | N THR A 219   | 22.221 | -36.513 | -72.684 | 1.00 | 0.00 | A | N |
| ATOM | 860 | CA THR A 219  | 21.967 | -37.527 | -73.665 | 1.00 | 0.00 | A | C |
| ATOM | 861 | CB THR A 219  | 21.469 | -36.959 | -74.962 | 1.00 | 0.00 | A | C |
| ATOM | 862 | OG1 THR A 219 | 20.298 | -36.188 | -74.744 | 1.00 | 0.00 | A | O |
| ATOM | 863 | CG2 THR A 219 | 21.160 | -38.119 | -75.925 | 1.00 | 0.00 | A | C |
| ATOM | 864 | C THR A 219   | 23.254 | -38.215 | -73.984 | 1.00 | 0.00 | A | C |
| ATOM | 865 | O THR A 219   | 23.317 | -39.441 | -74.027 | 1.00 | 0.00 | A | O |
| ATOM | 866 | N LEU A 220   | 24.329 | -37.439 | -74.197 | 1.00 | 0.00 | A | N |
| ATOM | 867 | CA LEU A 220  | 25.559 | -38.042 | -74.622 | 1.00 | 0.00 | A | C |
| ATOM | 868 | CB LEU A 220  | 26.657 | -37.007 | -74.922 | 1.00 | 0.00 | A | C |
| ATOM | 869 | CG LEU A 220  | 27.978 | -37.628 | -75.413 | 1.00 | 0.00 | A | C |
| ATOM | 870 | CD1 LEU A 220 | 27.782 | -38.370 | -76.745 | 1.00 | 0.00 | A | C |
| ATOM | 871 | CD2 LEU A 220 | 29.097 | -36.576 | -75.486 | 1.00 | 0.00 | A | C |
| ATOM | 872 | C LEU A 220   | 26.073 | -38.976 | -73.568 | 1.00 | 0.00 | A | C |
| ATOM | 873 | O LEU A 220   | 26.443 | -40.106 | -73.876 | 1.00 | 0.00 | A | O |
| ATOM | 874 | N LEU A 221   | 26.079 | -38.550 | -72.288 | 1.00 | 0.00 | A | N |
| ATOM | 875 | CA LEU A 221  | 26.653 | -39.363 | -71.247 | 1.00 | 0.00 | A | C |
| ATOM | 876 | CB LEU A 221  | 26.721 | -38.663 | -69.881 | 1.00 | 0.00 | A | C |
| ATOM | 877 | CG LEU A 221  | 27.892 | -37.667 | -69.764 | 1.00 | 0.00 | A | C |
| ATOM | 878 | CD1 LEU A 221 | 27.874 | -36.615 | -70.881 | 1.00 | 0.00 | A | C |
| ATOM | 879 | CD2 LEU A 221 | 27.933 | -37.037 | -68.365 | 1.00 | 0.00 | A | C |
| ATOM | 880 | C LEU A 221   | 25.911 | -40.652 | -71.084 | 1.00 | 0.00 | A | C |
| ATOM | 881 | O LEU A 221   | 26.528 | -41.699 | -70.898 | 1.00 | 0.00 | A | O |
| ATOM | 882 | N VAL A 222   | 24.569 | -40.611 | -71.152 | 1.00 | 0.00 | A | N |
| ATOM | 883 | CA VAL A 222  | 23.758 | -41.785 | -70.986 | 1.00 | 0.00 | A | C |
| ATOM | 884 | CB VAL A 222  | 22.289 | -41.482 | -71.042 | 1.00 | 0.00 | A | C |
| ATOM | 885 | CG1 VAL A 222 | 21.509 | -42.807 | -71.044 | 1.00 | 0.00 | A | C |
| ATOM | 886 | CG2 VAL A 222 | 21.937 | -40.561 | -69.860 | 1.00 | 0.00 | A | C |
| ATOM | 887 | C VAL A 222   | 24.061 | -42.776 | -72.074 | 1.00 | 0.00 | A | C |
| ATOM | 888 | O VAL A 222   | 24.077 | -43.982 | -71.834 | 1.00 | 0.00 | A | O |
| ATOM | 889 | N GLU A 223   | 24.274 | -42.295 | -73.315 | 1.00 | 0.00 | A | N |
| ATOM | 890 | CA GLU A 223  | 24.559 | -43.169 | -74.422 | 1.00 | 0.00 | A | C |
| ATOM | 891 | CB GLU A 223  | 24.560 | -42.452 | -75.783 | 1.00 | 0.00 | A | C |
| ATOM | 892 | CG GLU A 223  | 23.158 | -42.014 | -76.208 | 1.00 | 0.00 | A | C |

|      |     |     |           |        |         |         |      |      |   |   |
|------|-----|-----|-----------|--------|---------|---------|------|------|---|---|
| ATOM | 893 | CD  | GLU A 223 | 23.219 | -41.493 | -77.635 | 1.00 | 0.00 | A | C |
| ATOM | 894 | OE1 | GLU A 223 | 24.337 | -41.146 | -78.097 | 1.00 | 0.00 | A | O |
| ATOM | 895 | OE2 | GLU A 223 | 22.141 | -41.438 | -78.284 | 1.00 | 0.00 | A | O |
| ATOM | 896 | C   | GLU A 223 | 25.893 | -43.819 | -74.219 | 1.00 | 0.00 | A | C |
| ATOM | 897 | O   | GLU A 223 | 26.111 | -44.961 | -74.617 | 1.00 | 0.00 | A | O |
| ATOM | 898 | N   | ASN A 224 | 26.832 | -43.066 | -73.622 | 1.00 | 0.00 | A | N |
| ATOM | 899 | CA  | ASN A 224 | 28.167 | -43.475 | -73.286 | 1.00 | 0.00 | A | C |
| ATOM | 900 | CB  | ASN A 224 | 29.059 | -42.309 | -72.847 | 1.00 | 0.00 | A | C |
| ATOM | 901 | CG  | ASN A 224 | 29.202 | -41.391 | -74.044 | 1.00 | 0.00 | A | C |
| ATOM | 902 | OD1 | ASN A 224 | 29.389 | -41.832 | -75.176 | 1.00 | 0.00 | A | O |
| ATOM | 903 | ND2 | ASN A 224 | 29.094 | -40.063 | -73.784 | 1.00 | 0.00 | A | N |
| ATOM | 904 | C   | ASN A 224 | 28.105 | -44.427 | -72.132 | 1.00 | 0.00 | A | C |
| ATOM | 905 | O   | ASN A 224 | 29.116 | -45.023 | -71.765 | 1.00 | 0.00 | A | O |
| ATOM | 906 | N   | GLY A 225 | 26.944 | -44.522 | -71.449 | 1.00 | 0.00 | A | N |
| ATOM | 907 | CA  | GLY A 225 | 26.859 | -45.504 | -70.407 | 1.00 | 0.00 | A | C |
| ATOM | 908 | C   | GLY A 225 | 27.023 | -44.912 | -69.041 | 1.00 | 0.00 | A | C |
| ATOM | 909 | O   | GLY A 225 | 27.450 | -45.608 | -68.122 | 1.00 | 0.00 | A | O |
| ATOM | 910 | N   | ALA A 226 | 26.701 | -43.616 | -68.858 | 1.00 | 0.00 | A | N |
| ATOM | 911 | CA  | ALA A 226 | 26.795 | -43.061 | -67.537 | 1.00 | 0.00 | A | C |
| ATOM | 912 | CB  | ALA A 226 | 26.504 | -41.552 | -67.475 | 1.00 | 0.00 | A | C |
| ATOM | 913 | C   | ALA A 226 | 25.797 | -43.757 | -66.656 | 1.00 | 0.00 | A | C |
| ATOM | 914 | O   | ALA A 226 | 24.685 | -44.076 | -67.077 | 1.00 | 0.00 | A | O |
| ATOM | 915 | N   | ASP A 227 | 26.205 | -44.034 | -65.397 | 1.00 | 0.00 | A | N |
| ATOM | 916 | CA  | ASP A 227 | 25.364 | -44.676 | -64.428 | 1.00 | 0.00 | A | C |
| ATOM | 917 | CB  | ASP A 227 | 26.131 | -45.120 | -63.172 | 1.00 | 0.00 | A | C |
| ATOM | 918 | CG  | ASP A 227 | 25.187 | -45.897 | -62.269 | 1.00 | 0.00 | A | C |
| ATOM | 919 | OD1 | ASP A 227 | 24.043 | -46.187 | -62.711 | 1.00 | 0.00 | A | O |
| ATOM | 920 | OD2 | ASP A 227 | 25.598 | -46.209 | -61.119 | 1.00 | 0.00 | A | O |
| ATOM | 921 | C   | ASP A 227 | 24.327 | -43.685 | -63.993 | 1.00 | 0.00 | A | C |
| ATOM | 922 | O   | ASP A 227 | 24.642 | -42.638 | -63.429 | 1.00 | 0.00 | A | O |
| ATOM | 923 | N   | VAL A 228 | 23.052 | -44.016 | -64.252 | 1.00 | 0.00 | A | N |
| ATOM | 924 | CA  | VAL A 228 | 21.919 | -43.191 | -63.944 | 1.00 | 0.00 | A | C |
| ATOM | 925 | CB  | VAL A 228 | 20.672 | -43.653 | -64.643 | 1.00 | 0.00 | A | C |
| ATOM | 926 | CG1 | VAL A 228 | 19.477 | -42.828 | -64.135 | 1.00 | 0.00 | A | C |
| ATOM | 927 | CG2 | VAL A 228 | 20.896 | -43.529 | -66.162 | 1.00 | 0.00 | A | C |
| ATOM | 928 | C   | VAL A 228 | 21.649 | -43.147 | -62.463 | 1.00 | 0.00 | A | C |
| ATOM | 929 | O   | VAL A 228 | 21.034 | -42.205 | -61.965 | 1.00 | 0.00 | A | O |
| ATOM | 930 | N   | GLN A 229 | 21.997 | -44.234 | -61.755 | 1.00 | 0.00 | A | N |

|      |     |     |           |        |         |         |      |      |   |   |
|------|-----|-----|-----------|--------|---------|---------|------|------|---|---|
| ATOM | 931 | CA  | GLN A 229 | 21.811 | -44.433 | -60.339 | 1.00 | 0.00 | A | C |
| ATOM | 932 | CB  | GLN A 229 | 21.726 | -45.915 | -59.943 | 1.00 | 0.00 | A | C |
| ATOM | 933 | CG  | GLN A 229 | 20.461 | -46.573 | -60.496 | 1.00 | 0.00 | A | C |
| ATOM | 934 | CD  | GLN A 229 | 19.283 | -45.696 | -60.088 | 1.00 | 0.00 | A | C |
| ATOM | 935 | OE1 | GLN A 229 | 18.923 | -44.751 | -60.786 | 1.00 | 0.00 | A | O |
| ATOM | 936 | NE2 | GLN A 229 | 18.669 | -46.009 | -58.917 | 1.00 | 0.00 | A | N |
| ATOM | 937 | C   | GLN A 229 | 22.827 | -43.749 | -59.456 | 1.00 | 0.00 | A | C |
| ATOM | 938 | O   | GLN A 229 | 22.620 | -43.685 | -58.246 | 1.00 | 0.00 | A | O |
| ATOM | 939 | N   | ALA A 230 | 23.987 | -43.310 | -59.989 | 1.00 | 0.00 | A | N |
| ATOM | 940 | CA  | ALA A 230 | 25.052 | -42.789 | -59.160 | 1.00 | 0.00 | A | C |
| ATOM | 941 | CB  | ALA A 230 | 26.221 | -42.195 | -59.967 | 1.00 | 0.00 | A | C |
| ATOM | 942 | C   | ALA A 230 | 24.567 | -41.712 | -58.233 | 1.00 | 0.00 | A | C |
| ATOM | 943 | O   | ALA A 230 | 23.905 | -40.763 | -58.644 | 1.00 | 0.00 | A | O |
| ATOM | 944 | N   | ALA A 231 | 24.944 | -41.822 | -56.940 | 1.00 | 0.00 | A | N |
| ATOM | 945 | CA  | ALA A 231 | 24.478 | -40.875 | -55.964 | 1.00 | 0.00 | A | C |
| ATOM | 946 | CB  | ALA A 231 | 24.036 | -41.532 | -54.645 | 1.00 | 0.00 | A | C |
| ATOM | 947 | C   | ALA A 231 | 25.567 | -39.906 | -55.618 | 1.00 | 0.00 | A | C |
| ATOM | 948 | O   | ALA A 231 | 26.663 | -40.294 | -55.216 | 1.00 | 0.00 | A | O |
| ATOM | 949 | N   | ALA A 232 | 25.272 | -38.594 | -55.763 | 1.00 | 0.00 | A | N |
| ATOM | 950 | CA  | ALA A 232 | 26.227 | -37.601 | -55.361 | 1.00 | 0.00 | A | C |
| ATOM | 951 | CB  | ALA A 232 | 26.141 | -36.305 | -56.182 | 1.00 | 0.00 | A | C |
| ATOM | 952 | C   | ALA A 232 | 25.855 | -37.264 | -53.945 | 1.00 | 0.00 | A | C |
| ATOM | 953 | O   | ALA A 232 | 24.892 | -36.542 | -53.703 | 1.00 | 0.00 | A | O |
| ATOM | 954 | N   | HSD A 233 | 26.589 | -37.881 | -52.993 | 1.00 | 0.00 | A | N |
| ATOM | 955 | CA  | HSD A 233 | 26.475 | -37.844 | -51.555 | 1.00 | 0.00 | A | C |
| ATOM | 956 | CB  | HSD A 233 | 26.832 | -39.196 | -50.914 | 1.00 | 0.00 | A | C |
| ATOM | 957 | ND1 | HSD A 233 | 27.910 | -40.634 | -52.698 | 1.00 | 0.00 | A | N |
| ATOM | 958 | CG  | HSD A 233 | 28.009 | -39.859 | -51.562 | 1.00 | 0.00 | A | C |
| ATOM | 959 | CE1 | HSD A 233 | 29.163 | -41.057 | -52.992 | 1.00 | 0.00 | A | C |
| ATOM | 960 | NE2 | HSD A 233 | 30.059 | -40.611 | -52.131 | 1.00 | 0.00 | A | N |
| ATOM | 961 | CD2 | HSD A 233 | 29.327 | -39.858 | -51.230 | 1.00 | 0.00 | A | C |
| ATOM | 962 | C   | HSD A 233 | 27.216 | -36.759 | -50.814 | 1.00 | 0.00 | A | C |
| ATOM | 963 | O   | HSD A 233 | 26.975 | -36.580 | -49.621 | 1.00 | 0.00 | A | O |
| ATOM | 964 | N   | GLY A 234 | 28.181 | -36.053 | -51.431 | 1.00 | 0.00 | A | N |
| ATOM | 965 | CA  | GLY A 234 | 29.038 | -35.157 | -50.682 | 1.00 | 0.00 | A | C |
| ATOM | 966 | C   | GLY A 234 | 28.258 | -34.064 | -50.008 | 1.00 | 0.00 | A | C |
| ATOM | 967 | O   | GLY A 234 | 27.081 | -33.856 | -50.279 | 1.00 | 0.00 | A | O |
| ATOM | 968 | N   | ASP A 235 | 28.940 | -33.310 | -49.118 | 1.00 | 0.00 | A | N |

|      |      |     |           |        |         |         |      |      |   |   |
|------|------|-----|-----------|--------|---------|---------|------|------|---|---|
| ATOM | 969  | CA  | ASP A 235 | 28.346 | -32.271 | -48.316 | 1.00 | 0.00 | A | C |
| ATOM | 970  | CB  | ASP A 235 | 29.334 | -31.605 | -47.340 | 1.00 | 0.00 | A | C |
| ATOM | 971  | CG  | ASP A 235 | 29.536 | -32.565 | -46.172 | 1.00 | 0.00 | A | C |
| ATOM | 972  | OD1 | ASP A 235 | 28.724 | -33.522 | -46.051 | 1.00 | 0.00 | A | O |
| ATOM | 973  | OD2 | ASP A 235 | 30.499 | -32.356 | -45.386 | 1.00 | 0.00 | A | O |
| ATOM | 974  | C   | ASP A 235 | 27.754 | -31.218 | -49.202 | 1.00 | 0.00 | A | C |
| ATOM | 975  | O   | ASP A 235 | 26.828 | -30.512 | -48.809 | 1.00 | 0.00 | A | O |
| ATOM | 976  | N   | PHE A 236 | 28.285 | -31.077 | -50.428 | 1.00 | 0.00 | A | N |
| ATOM | 977  | CA  | PHE A 236 | 27.780 | -30.110 | -51.361 | 1.00 | 0.00 | A | C |
| ATOM | 978  | CB  | PHE A 236 | 28.595 | -30.063 | -52.669 | 1.00 | 0.00 | A | C |
| ATOM | 979  | CG  | PHE A 236 | 27.904 | -29.140 | -53.614 | 1.00 | 0.00 | A | C |
| ATOM | 980  | CD1 | PHE A 236 | 28.033 | -27.776 | -53.488 | 1.00 | 0.00 | A | C |
| ATOM | 981  | CE1 | PHE A 236 | 27.390 | -26.926 | -54.359 | 1.00 | 0.00 | A | C |
| ATOM | 982  | CZ  | PHE A 236 | 26.604 | -27.438 | -55.363 | 1.00 | 0.00 | A | C |
| ATOM | 983  | CD2 | PHE A 236 | 27.109 | -29.643 | -54.617 | 1.00 | 0.00 | A | C |
| ATOM | 984  | CE2 | PHE A 236 | 26.464 | -28.799 | -55.491 | 1.00 | 0.00 | A | C |
| ATOM | 985  | C   | PHE A 236 | 26.353 | -30.439 | -51.689 | 1.00 | 0.00 | A | C |
| ATOM | 986  | O   | PHE A 236 | 25.566 | -29.561 | -52.028 | 1.00 | 0.00 | A | O |
| ATOM | 987  | N   | PHE A 237 | 26.029 | -31.740 | -51.683 | 1.00 | 0.00 | A | N |
| ATOM | 988  | CA  | PHE A 237 | 24.770 | -32.355 | -51.996 | 1.00 | 0.00 | A | C |
| ATOM | 989  | CB  | PHE A 237 | 24.971 | -33.791 | -52.499 | 1.00 | 0.00 | A | C |
| ATOM | 990  | CG  | PHE A 237 | 25.844 | -33.602 | -53.696 | 1.00 | 0.00 | A | C |
| ATOM | 991  | CD1 | PHE A 237 | 25.326 | -33.102 | -54.869 | 1.00 | 0.00 | A | C |
| ATOM | 992  | CE1 | PHE A 237 | 26.129 | -32.920 | -55.970 | 1.00 | 0.00 | A | C |
| ATOM | 993  | CZ  | PHE A 237 | 27.464 | -33.238 | -55.912 | 1.00 | 0.00 | A | C |
| ATOM | 994  | CD2 | PHE A 237 | 27.182 | -33.916 | -53.644 | 1.00 | 0.00 | A | C |
| ATOM | 995  | CE2 | PHE A 237 | 27.990 | -33.736 | -54.744 | 1.00 | 0.00 | A | C |
| ATOM | 996  | C   | PHE A 237 | 23.751 | -32.315 | -50.893 | 1.00 | 0.00 | A | C |
| ATOM | 997  | O   | PHE A 237 | 22.607 | -32.688 | -51.142 | 1.00 | 0.00 | A | O |
| ATOM | 998  | N   | LYS A 238 | 24.150 | -32.014 | -49.634 | 1.00 | 0.00 | A | N |
| ATOM | 999  | CA  | LYS A 238 | 23.225 | -31.999 | -48.531 | 1.00 | 0.00 | A | C |
| ATOM | 1000 | CB  | LYS A 238 | 23.654 | -32.907 | -47.367 | 1.00 | 0.00 | A | C |
| ATOM | 1001 | CG  | LYS A 238 | 23.513 | -34.398 | -47.681 | 1.00 | 0.00 | A | C |
| ATOM | 1002 | CD  | LYS A 238 | 24.284 | -35.311 | -46.724 | 1.00 | 0.00 | A | C |
| ATOM | 1003 | CE  | LYS A 238 | 24.313 | -34.818 | -45.276 | 1.00 | 0.00 | A | C |
| ATOM | 1004 | NZ  | LYS A 238 | 25.309 | -33.735 | -45.125 | 1.00 | 0.00 | A | N |
| ATOM | 1005 | C   | LYS A 238 | 23.047 | -30.604 | -47.994 | 1.00 | 0.00 | A | C |
| ATOM | 1006 | O   | LYS A 238 | 23.593 | -29.636 | -48.522 | 1.00 | 0.00 | A | O |

|      |      |     |           |        |         |         |      |      |   |   |
|------|------|-----|-----------|--------|---------|---------|------|------|---|---|
| ATOM | 1007 | N   | LYS A 239 | 22.248 | -30.502 | -46.904 | 1.00 | 0.00 | A | N |
| ATOM | 1008 | CA  | LYS A 239 | 21.845 | -29.268 | -46.288 | 1.00 | 0.00 | A | C |
| ATOM | 1009 | CB  | LYS A 239 | 20.943 | -29.483 | -45.060 | 1.00 | 0.00 | A | C |
| ATOM | 1010 | CG  | LYS A 239 | 19.617 | -30.165 | -45.409 | 1.00 | 0.00 | A | C |
| ATOM | 1011 | CD  | LYS A 239 | 18.865 | -30.729 | -44.201 | 1.00 | 0.00 | A | C |
| ATOM | 1012 | CE  | LYS A 239 | 17.571 | -31.459 | -44.575 | 1.00 | 0.00 | A | C |
| ATOM | 1013 | NZ  | LYS A 239 | 16.964 | -32.072 | -43.372 | 1.00 | 0.00 | A | N |
| ATOM | 1014 | C   | LYS A 239 | 23.037 | -28.479 | -45.864 | 1.00 | 0.00 | A | C |
| ATOM | 1015 | O   | LYS A 239 | 24.012 | -28.996 | -45.322 | 1.00 | 0.00 | A | O |
| ATOM | 1016 | N   | THR A 240 | 22.922 | -27.158 | -46.095 | 1.00 | 0.00 | A | N |
| ATOM | 1017 | CA  | THR A 240 | 23.919 | -26.155 | -45.904 | 1.00 | 0.00 | A | C |
| ATOM | 1018 | CB  | THR A 240 | 23.379 | -24.834 | -46.384 | 1.00 | 0.00 | A | C |
| ATOM | 1019 | OG1 | THR A 240 | 24.408 | -23.881 | -46.587 | 1.00 | 0.00 | A | O |
| ATOM | 1020 | CG2 | THR A 240 | 22.354 | -24.324 | -45.359 | 1.00 | 0.00 | A | C |
| ATOM | 1021 | C   | THR A 240 | 24.280 | -26.083 | -44.450 | 1.00 | 0.00 | A | C |
| ATOM | 1022 | O   | THR A 240 | 23.425 | -26.111 | -43.569 | 1.00 | 0.00 | A | O |
| ATOM | 1023 | N   | LYS A 241 | 25.601 | -26.030 | -44.199 | 1.00 | 0.00 | A | N |
| ATOM | 1024 | CA  | LYS A 241 | 26.275 | -25.926 | -42.937 | 1.00 | 0.00 | A | C |
| ATOM | 1025 | CB  | LYS A 241 | 27.794 | -26.109 | -43.062 | 1.00 | 0.00 | A | C |
| ATOM | 1026 | CG  | LYS A 241 | 28.191 | -27.570 | -43.263 | 1.00 | 0.00 | A | C |
| ATOM | 1027 | CD  | LYS A 241 | 29.624 | -27.765 | -43.755 | 1.00 | 0.00 | A | C |
| ATOM | 1028 | CE  | LYS A 241 | 30.667 | -26.955 | -42.985 | 1.00 | 0.00 | A | C |
| ATOM | 1029 | NZ  | LYS A 241 | 30.624 | -25.530 | -43.382 | 1.00 | 0.00 | A | N |
| ATOM | 1030 | C   | LYS A 241 | 26.034 | -24.616 | -42.239 | 1.00 | 0.00 | A | C |
| ATOM | 1031 | O   | LYS A 241 | 25.923 | -24.618 | -41.013 | 1.00 | 0.00 | A | O |
| ATOM | 1032 | N   | GLY A 242 | 25.909 | -23.456 | -42.933 | 1.00 | 0.00 | A | N |
| ATOM | 1033 | CA  | GLY A 242 | 25.888 | -23.250 | -44.354 | 1.00 | 0.00 | A | C |
| ATOM | 1034 | C   | GLY A 242 | 27.196 | -23.547 | -45.015 | 1.00 | 0.00 | A | C |
| ATOM | 1035 | O   | GLY A 242 | 28.178 | -22.835 | -44.823 | 1.00 | 0.00 | A | O |
| ATOM | 1036 | N   | ARG A 243 | 27.244 | -24.650 | -45.796 | 1.00 | 0.00 | A | N |
| ATOM | 1037 | CA  | ARG A 243 | 28.398 | -24.948 | -46.579 | 1.00 | 0.00 | A | C |
| ATOM | 1038 | CB  | ARG A 243 | 28.528 | -26.426 | -46.977 | 1.00 | 0.00 | A | C |
| ATOM | 1039 | CG  | ARG A 243 | 29.831 | -26.703 | -47.726 | 1.00 | 0.00 | A | C |
| ATOM | 1040 | CD  | ARG A 243 | 30.444 | -28.075 | -47.444 | 1.00 | 0.00 | A | C |
| ATOM | 1041 | NE  | ARG A 243 | 31.177 | -27.956 | -46.155 | 1.00 | 0.00 | A | N |
| ATOM | 1042 | CZ  | ARG A 243 | 32.102 | -28.890 | -45.791 | 1.00 | 0.00 | A | C |
| ATOM | 1043 | NH1 | ARG A 243 | 32.376 | -29.947 | -46.612 | 1.00 | 0.00 | A | N |
| ATOM | 1044 | NH2 | ARG A 243 | 32.753 | -28.765 | -44.598 | 1.00 | 0.00 | A | N |



|      |      |     |           |        |         |         |      |      |   |   |
|------|------|-----|-----------|--------|---------|---------|------|------|---|---|
| ATOM | 1045 | C   | ARG A 243 | 28.441 | -24.087 | -47.803 | 1.00 | 0.00 | A | C |
| ATOM | 1046 | O   | ARG A 243 | 29.460 | -23.426 | -48.010 | 1.00 | 0.00 | A | O |
| ATOM | 1047 | N   | PRO A 244 | 27.427 | -23.985 | -48.649 | 1.00 | 0.00 | A | N |
| ATOM | 1048 | CD  | PRO A 244 | 27.237 | -22.676 | -49.250 | 1.00 | 0.00 | A | C |
| ATOM | 1049 | CA  | PRO A 244 | 26.172 | -24.732 | -48.609 | 1.00 | 0.00 | A | C |
| ATOM | 1050 | CB  | PRO A 244 | 25.166 | -23.874 | -49.379 | 1.00 | 0.00 | A | C |
| ATOM | 1051 | CG  | PRO A 244 | 25.727 | -22.455 | -49.330 | 1.00 | 0.00 | A | C |
| ATOM | 1052 | C   | PRO A 244 | 26.296 | -26.131 | -49.171 | 1.00 | 0.00 | A | C |
| ATOM | 1053 | O   | PRO A 244 | 27.400 | -26.501 | -49.562 | 1.00 | 0.00 | A | O |
| ATOM | 1054 | N   | GLY A 245 | 25.190 | -26.924 | -49.271 | 1.00 | 0.00 | A | N |
| ATOM | 1055 | CA  | GLY A 245 | 23.969 | -26.566 | -49.964 | 1.00 | 0.00 | A | C |
| ATOM | 1056 | C   | GLY A 245 | 24.243 | -26.760 | -51.428 | 1.00 | 0.00 | A | C |
| ATOM | 1057 | O   | GLY A 245 | 25.250 | -26.258 | -51.928 | 1.00 | 0.00 | A | O |
| ATOM | 1058 | N   | PHE A 246 | 23.333 | -27.404 | -52.209 | 1.00 | 0.00 | A | N |
| ATOM | 1059 | CA  | PHE A 246 | 21.961 | -27.729 | -51.893 | 1.00 | 0.00 | A | C |
| ATOM | 1060 | CB  | PHE A 246 | 21.033 | -26.785 | -52.685 | 1.00 | 0.00 | A | C |
| ATOM | 1061 | CG  | PHE A 246 | 19.675 | -27.353 | -52.904 | 1.00 | 0.00 | A | C |
| ATOM | 1062 | CD1 | PHE A 246 | 18.682 | -27.306 | -51.952 | 1.00 | 0.00 | A | C |
| ATOM | 1063 | CE1 | PHE A 246 | 17.442 | -27.840 | -52.222 | 1.00 | 0.00 | A | C |
| ATOM | 1064 | CZ  | PHE A 246 | 17.182 | -28.419 | -53.443 | 1.00 | 0.00 | A | C |
| ATOM | 1065 | CD2 | PHE A 246 | 19.402 | -27.925 | -54.126 | 1.00 | 0.00 | A | C |
| ATOM | 1066 | CE2 | PHE A 246 | 18.167 | -28.461 | -54.402 | 1.00 | 0.00 | A | C |
| ATOM | 1067 | C   | PHE A 246 | 21.608 | -29.162 | -52.199 | 1.00 | 0.00 | A | C |
| ATOM | 1068 | O   | PHE A 246 | 22.224 | -29.807 | -53.047 | 1.00 | 0.00 | A | O |
| ATOM | 1069 | N   | TYR A 247 | 20.543 | -29.664 | -51.519 | 1.00 | 0.00 | A | N |
| ATOM | 1070 | CA  | TYR A 247 | 20.191 | -31.063 | -51.516 | 1.00 | 0.00 | A | C |
| ATOM | 1071 | CB  | TYR A 247 | 20.095 | -31.553 | -50.062 | 1.00 | 0.00 | A | C |
| ATOM | 1072 | CG  | TYR A 247 | 19.364 | -32.839 | -49.979 | 1.00 | 0.00 | A | C |
| ATOM | 1073 | CD1 | TYR A 247 | 19.999 | -34.049 | -50.131 | 1.00 | 0.00 | A | C |
| ATOM | 1074 | CE1 | TYR A 247 | 19.274 | -35.216 | -50.035 | 1.00 | 0.00 | A | C |
| ATOM | 1075 | CZ  | TYR A 247 | 17.920 | -35.169 | -49.785 | 1.00 | 0.00 | A | C |
| ATOM | 1076 | OH  | TYR A 247 | 17.170 | -36.354 | -49.682 | 1.00 | 0.00 | A | O |
| ATOM | 1077 | CD2 | TYR A 247 | 18.015 | -32.804 | -49.731 | 1.00 | 0.00 | A | C |
| ATOM | 1078 | CE2 | TYR A 247 | 17.289 | -33.960 | -49.633 | 1.00 | 0.00 | A | C |
| ATOM | 1079 | C   | TYR A 247 | 18.901 | -31.369 | -52.236 | 1.00 | 0.00 | A | C |
| ATOM | 1080 | O   | TYR A 247 | 17.812 | -30.988 | -51.817 | 1.00 | 0.00 | A | O |
| ATOM | 1081 | N   | PHE A 248 | 19.050 | -31.976 | -53.428 | 1.00 | 0.00 | A | N |
| ATOM | 1082 | CA  | PHE A 248 | 18.102 | -32.534 | -54.363 | 1.00 | 0.00 | A | C |

|      |      |     |           |        |         |         |      |      |   |   |
|------|------|-----|-----------|--------|---------|---------|------|------|---|---|
| ATOM | 1083 | CB  | PHE A 248 | 18.449 | -32.190 | -55.813 | 1.00 | 0.00 | A | C |
| ATOM | 1084 | CG  | PHE A 248 | 19.842 | -32.631 | -56.060 | 1.00 | 0.00 | A | C |
| ATOM | 1085 | CD1 | PHE A 248 | 20.888 | -31.805 | -55.728 | 1.00 | 0.00 | A | C |
| ATOM | 1086 | CE1 | PHE A 248 | 22.184 | -32.201 | -55.955 | 1.00 | 0.00 | A | C |
| ATOM | 1087 | CZ  | PHE A 248 | 22.434 | -33.431 | -56.515 | 1.00 | 0.00 | A | C |
| ATOM | 1088 | CD2 | PHE A 248 | 20.098 | -33.864 | -56.612 | 1.00 | 0.00 | A | C |
| ATOM | 1089 | CE2 | PHE A 248 | 21.392 | -34.264 | -56.843 | 1.00 | 0.00 | A | C |
| ATOM | 1090 | C   | PHE A 248 | 17.935 | -34.004 | -54.203 | 1.00 | 0.00 | A | C |
| ATOM | 1091 | O   | PHE A 248 | 17.321 | -34.673 | -55.031 | 1.00 | 0.00 | A | O |
| ATOM | 1092 | N   | GLY A 249 | 18.773 | -34.531 | -53.321 | 1.00 | 0.00 | A | N |
| ATOM | 1093 | CA  | GLY A 249 | 18.939 | -35.862 | -52.887 | 1.00 | 0.00 | A | C |
| ATOM | 1094 | C   | GLY A 249 | 19.594 | -36.695 | -53.938 | 1.00 | 0.00 | A | C |
| ATOM | 1095 | O   | GLY A 249 | 18.897 | -37.382 | -54.675 | 1.00 | 0.00 | A | O |
| ATOM | 1096 | N   | GLU A 250 | 20.904 | -36.484 | -54.155 | 1.00 | 0.00 | A | N |
| ATOM | 1097 | CA  | GLU A 250 | 21.887 | -37.421 | -54.651 | 1.00 | 0.00 | A | C |
| ATOM | 1098 | CB  | GLU A 250 | 22.168 | -38.503 | -53.599 | 1.00 | 0.00 | A | C |
| ATOM | 1099 | CG  | GLU A 250 | 22.650 | -37.915 | -52.271 | 1.00 | 0.00 | A | C |
| ATOM | 1100 | CD  | GLU A 250 | 22.901 | -39.058 | -51.300 | 1.00 | 0.00 | A | C |
| ATOM | 1101 | OE1 | GLU A 250 | 22.860 | -40.234 | -51.752 | 1.00 | 0.00 | A | O |
| ATOM | 1102 | OE2 | GLU A 250 | 23.145 | -38.773 | -50.099 | 1.00 | 0.00 | A | O |
| ATOM | 1103 | C   | GLU A 250 | 21.707 | -38.141 | -55.970 | 1.00 | 0.00 | A | C |
| ATOM | 1104 | O   | GLU A 250 | 22.717 | -38.478 | -56.592 | 1.00 | 0.00 | A | O |
| ATOM | 1105 | N   | LEU A 251 | 20.487 | -38.335 | -56.498 | 1.00 | 0.00 | A | N |
| ATOM | 1106 | CA  | LEU A 251 | 20.335 | -39.180 | -57.664 | 1.00 | 0.00 | A | C |
| ATOM | 1107 | CB  | LEU A 251 | 19.229 | -40.243 | -57.512 | 1.00 | 0.00 | A | C |
| ATOM | 1108 | CG  | LEU A 251 | 19.486 | -41.338 | -56.461 | 1.00 | 0.00 | A | C |
| ATOM | 1109 | CD1 | LEU A 251 | 18.291 | -42.299 | -56.382 | 1.00 | 0.00 | A | C |
| ATOM | 1110 | CD2 | LEU A 251 | 20.798 | -42.092 | -56.731 | 1.00 | 0.00 | A | C |
| ATOM | 1111 | C   | LEU A 251 | 19.891 | -38.321 | -58.799 | 1.00 | 0.00 | A | C |
| ATOM | 1112 | O   | LEU A 251 | 19.062 | -37.435 | -58.612 | 1.00 | 0.00 | A | O |
| ATOM | 1113 | N   | PRO A 252 | 20.370 | -38.613 | -59.982 | 1.00 | 0.00 | A | N |
| ATOM | 1114 | CD  | PRO A 252 | 21.478 | -39.535 | -60.165 | 1.00 | 0.00 | A | C |
| ATOM | 1115 | CA  | PRO A 252 | 20.109 | -37.824 | -61.152 | 1.00 | 0.00 | A | C |
| ATOM | 1116 | CB  | PRO A 252 | 20.819 | -38.546 | -62.296 | 1.00 | 0.00 | A | C |
| ATOM | 1117 | CG  | PRO A 252 | 21.988 | -39.266 | -61.593 | 1.00 | 0.00 | A | C |
| ATOM | 1118 | C   | PRO A 252 | 18.656 | -37.536 | -61.380 | 1.00 | 0.00 | A | C |
| ATOM | 1119 | O   | PRO A 252 | 18.329 | -36.389 | -61.672 | 1.00 | 0.00 | A | O |
| ATOM | 1120 | N   | LEU A 253 | 17.766 | -38.531 | -61.232 | 1.00 | 0.00 | A | N |

|      |      |     |     |   |     |        |         |         |      |      |   |   |
|------|------|-----|-----|---|-----|--------|---------|---------|------|------|---|---|
| ATOM | 1121 | CA  | LEU | A | 253 | 16.364 | -38.283 | -61.425 | 1.00 | 0.00 | A | C |
| ATOM | 1122 | CB  | LEU | A | 253 | 15.496 | -39.534 | -61.211 | 1.00 | 0.00 | A | C |
| ATOM | 1123 | CG  | LEU | A | 253 | 13.989 | -39.282 | -61.419 | 1.00 | 0.00 | A | C |
| ATOM | 1124 | CD1 | LEU | A | 253 | 13.638 | -39.032 | -62.890 | 1.00 | 0.00 | A | C |
| ATOM | 1125 | CD2 | LEU | A | 253 | 13.146 | -40.398 | -60.798 | 1.00 | 0.00 | A | C |
| ATOM | 1126 | C   | LEU | A | 253 | 15.919 | -37.278 | -60.402 | 1.00 | 0.00 | A | C |
| ATOM | 1127 | O   | LEU | A | 253 | 15.190 | -36.339 | -60.718 | 1.00 | 0.00 | A | O |
| ATOM | 1128 | N   | SER | A | 254 | 16.370 | -37.442 | -59.143 | 1.00 | 0.00 | A | N |
| ATOM | 1129 | CA  | SER | A | 254 | 15.944 | -36.585 | -58.070 | 1.00 | 0.00 | A | C |
| ATOM | 1130 | CB  | SER | A | 254 | 16.563 | -36.985 | -56.722 | 1.00 | 0.00 | A | C |
| ATOM | 1131 | OG  | SER | A | 254 | 16.113 | -38.282 | -56.358 | 1.00 | 0.00 | A | O |
| ATOM | 1132 | C   | SER | A | 254 | 16.371 | -35.185 | -58.375 | 1.00 | 0.00 | A | C |
| ATOM | 1133 | O   | SER | A | 254 | 15.602 | -34.239 | -58.212 | 1.00 | 0.00 | A | O |
| ATOM | 1134 | N   | LEU | A | 255 | 17.619 | -35.030 | -58.843 | 1.00 | 0.00 | A | N |
| ATOM | 1135 | CA  | LEU | A | 255 | 18.155 | -33.746 | -59.182 | 1.00 | 0.00 | A | C |
| ATOM | 1136 | CB  | LEU | A | 255 | 19.605 | -33.852 | -59.699 | 1.00 | 0.00 | A | C |
| ATOM | 1137 | CG  | LEU | A | 255 | 20.244 | -32.502 | -60.084 | 1.00 | 0.00 | A | C |
| ATOM | 1138 | CD1 | LEU | A | 255 | 20.357 | -31.574 | -58.869 | 1.00 | 0.00 | A | C |
| ATOM | 1139 | CD2 | LEU | A | 255 | 21.598 | -32.698 | -60.792 | 1.00 | 0.00 | A | C |
| ATOM | 1140 | C   | LEU | A | 255 | 17.328 | -33.154 | -60.279 | 1.00 | 0.00 | A | C |
| ATOM | 1141 | O   | LEU | A | 255 | 16.893 | -32.006 | -60.200 | 1.00 | 0.00 | A | O |
| ATOM | 1142 | N   | ALA | A | 256 | 17.031 | -33.957 | -61.317 | 1.00 | 0.00 | A | N |
| ATOM | 1143 | CA  | ALA | A | 256 | 16.350 | -33.445 | -62.477 | 1.00 | 0.00 | A | C |
| ATOM | 1144 | CB  | ALA | A | 256 | 16.125 | -34.515 | -63.559 | 1.00 | 0.00 | A | C |
| ATOM | 1145 | C   | ALA | A | 256 | 15.008 | -32.915 | -62.073 | 1.00 | 0.00 | A | C |
| ATOM | 1146 | O   | ALA | A | 256 | 14.546 | -31.912 | -62.618 | 1.00 | 0.00 | A | O |
| ATOM | 1147 | N   | ALA | A | 257 | 14.313 | -33.622 | -61.161 | 1.00 | 0.00 | A | N |
| ATOM | 1148 | CA  | ALA | A | 257 | 13.015 | -33.195 | -60.715 | 1.00 | 0.00 | A | C |
| ATOM | 1149 | CB  | ALA | A | 257 | 12.301 | -34.290 | -59.899 | 1.00 | 0.00 | A | C |
| ATOM | 1150 | C   | ALA | A | 257 | 13.082 | -31.952 | -59.863 | 1.00 | 0.00 | A | C |
| ATOM | 1151 | O   | ALA | A | 257 | 12.368 | -30.981 | -60.117 | 1.00 | 0.00 | A | O |
| ATOM | 1152 | N   | CYS | A | 258 | 13.995 | -31.924 | -58.866 | 1.00 | 0.00 | A | N |
| ATOM | 1153 | CA  | CYS | A | 258 | 14.077 | -30.865 | -57.893 | 1.00 | 0.00 | A | C |
| ATOM | 1154 | CB  | CYS | A | 258 | 15.152 | -31.106 | -56.817 | 1.00 | 0.00 | A | C |
| ATOM | 1155 | SG  | CYS | A | 258 | 14.708 | -32.442 | -55.665 | 1.00 | 0.00 | A | S |
| ATOM | 1156 | C   | CYS | A | 258 | 14.403 | -29.574 | -58.569 | 1.00 | 0.00 | A | C |
| ATOM | 1157 | O   | CYS | A | 258 | 14.057 | -28.499 | -58.086 | 1.00 | 0.00 | A | O |
| ATOM | 1158 | N   | THR | A | 259 | 15.164 | -29.662 | -59.666 | 1.00 | 0.00 | A | N |

|      |      |               |        |         |         |      |      |   |   |
|------|------|---------------|--------|---------|---------|------|------|---|---|
| ATOM | 1159 | CA THR A 259  | 15.569 | -28.575 | -60.512 | 1.00 | 0.00 | A | C |
| ATOM | 1160 | CB THR A 259  | 16.772 | -28.895 | -61.353 | 1.00 | 0.00 | A | C |
| ATOM | 1161 | OG1 THR A 259 | 16.498 | -29.981 | -62.223 | 1.00 | 0.00 | A | O |
| ATOM | 1162 | CG2 THR A 259 | 17.942 | -29.243 | -60.416 | 1.00 | 0.00 | A | C |
| ATOM | 1163 | C THR A 259   | 14.447 | -28.166 | -61.415 | 1.00 | 0.00 | A | C |
| ATOM | 1164 | O THR A 259   | 14.573 | -27.192 | -62.155 | 1.00 | 0.00 | A | O |
| ATOM | 1165 | N ASN A 260   | 13.348 | -28.946 | -61.441 | 1.00 | 0.00 | A | N |
| ATOM | 1166 | CA ASN A 260  | 12.224 | -28.666 | -62.284 | 1.00 | 0.00 | A | C |
| ATOM | 1167 | CB ASN A 260  | 11.561 | -27.306 | -61.985 | 1.00 | 0.00 | A | C |
| ATOM | 1168 | CG ASN A 260  | 10.140 | -27.368 | -62.525 | 1.00 | 0.00 | A | C |
| ATOM | 1169 | OD1 ASN A 260 | 9.477  | -28.398 | -62.414 | 1.00 | 0.00 | A | O |
| ATOM | 1170 | ND2 ASN A 260 | 9.664  | -26.247 | -63.128 | 1.00 | 0.00 | A | N |
| ATOM | 1171 | C ASN A 260   | 12.619 | -28.732 | -63.727 | 1.00 | 0.00 | A | C |
| ATOM | 1172 | O ASN A 260   | 12.453 | -27.780 | -64.489 | 1.00 | 0.00 | A | O |
| ATOM | 1173 | N GLN A 261   | 13.213 | -29.869 | -64.136 | 1.00 | 0.00 | A | N |
| ATOM | 1174 | CA GLN A 261  | 13.489 | -30.034 | -65.532 | 1.00 | 0.00 | A | C |
| ATOM | 1175 | CB GLN A 261  | 14.973 | -29.827 | -65.891 | 1.00 | 0.00 | A | C |
| ATOM | 1176 | CG GLN A 261  | 15.981 | -30.639 | -65.087 | 1.00 | 0.00 | A | C |
| ATOM | 1177 | CD GLN A 261  | 17.338 | -29.988 | -65.338 | 1.00 | 0.00 | A | C |
| ATOM | 1178 | OE1 GLN A 261 | 17.600 | -29.477 | -66.425 | 1.00 | 0.00 | A | O |
| ATOM | 1179 | NE2 GLN A 261 | 18.222 | -29.996 | -64.306 | 1.00 | 0.00 | A | N |
| ATOM | 1180 | C GLN A 261   | 12.908 | -31.342 | -65.976 | 1.00 | 0.00 | A | C |
| ATOM | 1181 | O GLN A 261   | 13.543 | -32.395 | -65.952 | 1.00 | 0.00 | A | O |
| ATOM | 1182 | N LEU A 262   | 11.642 | -31.261 | -66.439 | 1.00 | 0.00 | A | N |
| ATOM | 1183 | CA LEU A 262  | 10.836 | -32.406 | -66.745 | 1.00 | 0.00 | A | C |
| ATOM | 1184 | CB LEU A 262  | 9.378  | -32.070 | -67.077 | 1.00 | 0.00 | A | C |
| ATOM | 1185 | CG LEU A 262  | 8.561  | -33.336 | -67.386 | 1.00 | 0.00 | A | C |
| ATOM | 1186 | CD1 LEU A 262 | 8.465  | -34.253 | -66.156 | 1.00 | 0.00 | A | C |
| ATOM | 1187 | CD2 LEU A 262 | 7.193  | -32.988 | -67.981 | 1.00 | 0.00 | A | C |
| ATOM | 1188 | C LEU A 262   | 11.370 | -33.213 | -67.881 | 1.00 | 0.00 | A | C |
| ATOM | 1189 | O LEU A 262   | 11.370 | -34.440 | -67.806 | 1.00 | 0.00 | A | O |
| ATOM | 1190 | N GLY A 263   | 11.862 | -32.566 | -68.955 | 1.00 | 0.00 | A | N |
| ATOM | 1191 | CA GLY A 263  | 12.251 | -33.311 | -70.120 | 1.00 | 0.00 | A | C |
| ATOM | 1192 | C GLY A 263   | 13.304 | -34.303 | -69.746 | 1.00 | 0.00 | A | C |
| ATOM | 1193 | O GLY A 263   | 13.286 | -35.443 | -70.209 | 1.00 | 0.00 | A | O |
| ATOM | 1194 | N ILE A 264   | 14.266 | -33.885 | -68.908 | 1.00 | 0.00 | A | N |
| ATOM | 1195 | CA ILE A 264  | 15.321 | -34.756 | -68.482 | 1.00 | 0.00 | A | C |
| ATOM | 1196 | CB ILE A 264  | 16.447 | -34.046 | -67.783 | 1.00 | 0.00 | A | C |

|      |      |     |           |        |         |         |      |      |   |   |
|------|------|-----|-----------|--------|---------|---------|------|------|---|---|
| ATOM | 1197 | CG2 | ILE A 264 | 17.434 | -35.106 | -67.269 | 1.00 | 0.00 | A | C |
| ATOM | 1198 | CG1 | ILE A 264 | 17.097 | -33.037 | -68.747 | 1.00 | 0.00 | A | C |
| ATOM | 1199 | CD  | ILE A 264 | 18.195 | -32.189 | -68.105 | 1.00 | 0.00 | A | C |
| ATOM | 1200 | C   | ILE A 264 | 14.764 | -35.830 | -67.598 | 1.00 | 0.00 | A | C |
| ATOM | 1201 | O   | ILE A 264 | 15.231 | -36.968 | -67.628 | 1.00 | 0.00 | A | O |
| ATOM | 1202 | N   | VAL A 265 | 13.762 | -35.500 | -66.754 | 1.00 | 0.00 | A | N |
| ATOM | 1203 | CA  | VAL A 265 | 13.190 | -36.523 | -65.925 | 1.00 | 0.00 | A | C |
| ATOM | 1204 | CB  | VAL A 265 | 12.031 | -36.036 | -65.093 | 1.00 | 0.00 | A | C |
| ATOM | 1205 | CG1 | VAL A 265 | 11.352 | -37.245 | -64.424 | 1.00 | 0.00 | A | C |
| ATOM | 1206 | CG2 | VAL A 265 | 12.552 | -35.007 | -64.079 | 1.00 | 0.00 | A | C |
| ATOM | 1207 | C   | VAL A 265 | 12.670 | -37.597 | -66.831 | 1.00 | 0.00 | A | C |
| ATOM | 1208 | O   | VAL A 265 | 12.901 | -38.783 | -66.592 | 1.00 | 0.00 | A | O |
| ATOM | 1209 | N   | LYS A 266 | 11.967 | -37.206 | -67.913 | 1.00 | 0.00 | A | N |
| ATOM | 1210 | CA  | LYS A 266 | 11.416 | -38.181 | -68.815 | 1.00 | 0.00 | A | C |
| ATOM | 1211 | CB  | LYS A 266 | 10.562 | -37.555 | -69.933 | 1.00 | 0.00 | A | C |
| ATOM | 1212 | CG  | LYS A 266 | 9.227  | -36.989 | -69.438 | 1.00 | 0.00 | A | C |
| ATOM | 1213 | CD  | LYS A 266 | 8.472  | -36.158 | -70.479 | 1.00 | 0.00 | A | C |
| ATOM | 1214 | CE  | LYS A 266 | 7.090  | -35.689 | -70.008 | 1.00 | 0.00 | A | C |
| ATOM | 1215 | NZ  | LYS A 266 | 6.414  | -34.929 | -71.084 | 1.00 | 0.00 | A | N |
| ATOM | 1216 | C   | LYS A 266 | 12.523 | -38.959 | -69.460 | 1.00 | 0.00 | A | C |
| ATOM | 1217 | O   | LYS A 266 | 12.489 | -40.187 | -69.519 | 1.00 | 0.00 | A | O |
| ATOM | 1218 | N   | PHE A 267 | 13.572 | -38.257 | -69.910 | 1.00 | 0.00 | A | N |
| ATOM | 1219 | CA  | PHE A 267 | 14.672 | -38.865 | -70.603 | 1.00 | 0.00 | A | C |
| ATOM | 1220 | CB  | PHE A 267 | 15.737 | -37.809 | -70.972 | 1.00 | 0.00 | A | C |
| ATOM | 1221 | CG  | PHE A 267 | 16.904 | -38.451 | -71.640 | 1.00 | 0.00 | A | C |
| ATOM | 1222 | CD1 | PHE A 267 | 17.948 | -38.944 | -70.889 | 1.00 | 0.00 | A | C |
| ATOM | 1223 | CE1 | PHE A 267 | 19.033 | -39.531 | -71.495 | 1.00 | 0.00 | A | C |
| ATOM | 1224 | CZ  | PHE A 267 | 19.085 | -39.631 | -72.864 | 1.00 | 0.00 | A | C |
| ATOM | 1225 | CD2 | PHE A 267 | 16.967 | -38.548 | -73.011 | 1.00 | 0.00 | A | C |
| ATOM | 1226 | CE2 | PHE A 267 | 18.049 | -39.139 | -73.621 | 1.00 | 0.00 | A | C |
| ATOM | 1227 | C   | PHE A 267 | 15.299 | -39.885 | -69.707 | 1.00 | 0.00 | A | C |
| ATOM | 1228 | O   | PHE A 267 | 15.698 | -40.955 | -70.163 | 1.00 | 0.00 | A | O |
| ATOM | 1229 | N   | LEU A 268 | 15.433 | -39.577 | -68.404 | 1.00 | 0.00 | A | N |
| ATOM | 1230 | CA  | LEU A 268 | 16.083 | -40.522 | -67.540 | 1.00 | 0.00 | A | C |
| ATOM | 1231 | CB  | LEU A 268 | 16.268 | -40.000 | -66.103 | 1.00 | 0.00 | A | C |
| ATOM | 1232 | CG  | LEU A 268 | 17.254 | -38.823 | -65.979 | 1.00 | 0.00 | A | C |
| ATOM | 1233 | CD1 | LEU A 268 | 17.386 | -38.361 | -64.519 | 1.00 | 0.00 | A | C |
| ATOM | 1234 | CD2 | LEU A 268 | 18.616 | -39.156 | -66.610 | 1.00 | 0.00 | A | C |

|      |      |     |           |        |         |         |      |      |   |   |
|------|------|-----|-----------|--------|---------|---------|------|------|---|---|
| ATOM | 1235 | C   | LEU A 268 | 15.283 | -41.791 | -67.458 | 1.00 | 0.00 | A | C |
| ATOM | 1236 | O   | LEU A 268 | 15.825 | -42.884 | -67.598 | 1.00 | 0.00 | A | O |
| ATOM | 1237 | N   | LEU A 269 | 13.966 | -41.672 | -67.221 | 1.00 | 0.00 | A | N |
| ATOM | 1238 | CA  | LEU A 269 | 13.115 | -42.816 | -67.048 | 1.00 | 0.00 | A | C |
| ATOM | 1239 | CB  | LEU A 269 | 11.729 | -42.425 | -66.512 | 1.00 | 0.00 | A | C |
| ATOM | 1240 | CG  | LEU A 269 | 11.750 | -41.843 | -65.084 | 1.00 | 0.00 | A | C |
| ATOM | 1241 | CD1 | LEU A 269 | 10.334 | -41.475 | -64.620 | 1.00 | 0.00 | A | C |
| ATOM | 1242 | CD2 | LEU A 269 | 12.453 | -42.786 | -64.095 | 1.00 | 0.00 | A | C |
| ATOM | 1243 | C   | LEU A 269 | 12.904 | -43.592 | -68.323 | 1.00 | 0.00 | A | C |
| ATOM | 1244 | O   | LEU A 269 | 12.830 | -44.819 | -68.299 | 1.00 | 0.00 | A | O |
| ATOM | 1245 | N   | GLN A 270 | 12.700 | -42.880 | -69.450 | 1.00 | 0.00 | A | N |
| ATOM | 1246 | CA  | GLN A 270 | 12.376 | -43.444 | -70.738 | 1.00 | 0.00 | A | C |
| ATOM | 1247 | CB  | GLN A 270 | 11.583 | -42.461 | -71.612 | 1.00 | 0.00 | A | C |
| ATOM | 1248 | CG  | GLN A 270 | 10.198 | -42.188 | -71.020 | 1.00 | 0.00 | A | C |
| ATOM | 1249 | CD  | GLN A 270 | 9.465  | -41.210 | -71.922 | 1.00 | 0.00 | A | C |
| ATOM | 1250 | OE1 | GLN A 270 | 9.954  | -40.840 | -72.988 | 1.00 | 0.00 | A | O |
| ATOM | 1251 | NE2 | GLN A 270 | 8.255  | -40.782 | -71.479 | 1.00 | 0.00 | A | N |
| ATOM | 1252 | C   | GLN A 270 | 13.504 | -44.027 | -71.561 | 1.00 | 0.00 | A | C |
| ATOM | 1253 | O   | GLN A 270 | 13.285 | -44.997 | -72.285 | 1.00 | 0.00 | A | O |
| ATOM | 1254 | N   | ASN A 271 | 14.733 | -43.471 | -71.489 | 1.00 | 0.00 | A | N |
| ATOM | 1255 | CA  | ASN A 271 | 15.780 | -43.800 | -72.436 | 1.00 | 0.00 | A | C |
| ATOM | 1256 | CB  | ASN A 271 | 17.120 | -43.066 | -72.214 | 1.00 | 0.00 | A | C |
| ATOM | 1257 | CG  | ASN A 271 | 17.777 | -43.576 | -70.942 | 1.00 | 0.00 | A | C |
| ATOM | 1258 | OD1 | ASN A 271 | 18.666 | -44.424 | -70.996 | 1.00 | 0.00 | A | O |
| ATOM | 1259 | ND2 | ASN A 271 | 17.345 | -43.044 | -69.771 | 1.00 | 0.00 | A | N |
| ATOM | 1260 | C   | ASN A 271 | 16.073 | -45.270 | -72.532 | 1.00 | 0.00 | A | C |
| ATOM | 1261 | O   | ASN A 271 | 15.792 | -46.060 | -71.633 | 1.00 | 0.00 | A | O |
| ATOM | 1262 | N   | SER A 272 | 16.612 | -45.661 | -73.711 | 1.00 | 0.00 | A | N |
| ATOM | 1263 | CA  | SER A 272 | 16.942 | -47.010 | -74.079 | 1.00 | 0.00 | A | C |
| ATOM | 1264 | CB  | SER A 272 | 17.298 | -47.130 | -75.568 | 1.00 | 0.00 | A | C |
| ATOM | 1265 | OG  | SER A 272 | 16.185 | -46.763 | -76.368 | 1.00 | 0.00 | A | O |
| ATOM | 1266 | C   | SER A 272 | 18.131 | -47.522 | -73.322 | 1.00 | 0.00 | A | C |
| ATOM | 1267 | O   | SER A 272 | 18.186 | -48.704 | -72.980 | 1.00 | 0.00 | A | O |
| ATOM | 1268 | N   | TRP A 273 | 19.131 | -46.655 | -73.083 | 1.00 | 0.00 | A | N |
| ATOM | 1269 | CA  | TRP A 273 | 20.374 | -47.089 | -72.502 | 1.00 | 0.00 | A | C |
| ATOM | 1270 | CB  | TRP A 273 | 21.455 | -46.006 | -72.564 | 1.00 | 0.00 | A | C |
| ATOM | 1271 | CG  | TRP A 273 | 21.860 | -45.730 | -73.991 | 1.00 | 0.00 | A | C |
| ATOM | 1272 | CD1 | TRP A 273 | 21.334 | -44.831 | -74.873 | 1.00 | 0.00 | A | C |

|      |      |               |        |         |         |      |      |   |   |
|------|------|---------------|--------|---------|---------|------|------|---|---|
| ATOM | 1273 | NE1 TRP A 273 | 21.975 | -44.938 | -76.083 | 1.00 | 0.00 | A | N |
| ATOM | 1274 | CE2 TRP A 273 | 22.938 | -45.922 | -75.987 | 1.00 | 0.00 | A | C |
| ATOM | 1275 | CD2 TRP A 273 | 22.890 | -46.434 | -74.691 | 1.00 | 0.00 | A | C |
| ATOM | 1276 | CE3 TRP A 273 | 23.736 | -47.434 | -74.290 | 1.00 | 0.00 | A | C |
| ATOM | 1277 | CZ3 TRP A 273 | 24.633 | -47.913 | -75.217 | 1.00 | 0.00 | A | C |
| ATOM | 1278 | CZ2 TRP A 273 | 23.830 | -46.397 | -76.903 | 1.00 | 0.00 | A | C |
| ATOM | 1279 | CH2 TRP A 273 | 24.678 | -47.403 | -76.500 | 1.00 | 0.00 | A | C |
| ATOM | 1280 | C TRP A 273   | 20.227 | -47.552 | -71.089 | 1.00 | 0.00 | A | C |
| ATOM | 1281 | O TRP A 273   | 20.613 | -48.674 | -70.763 | 1.00 | 0.00 | A | O |
| ATOM | 1282 | N GLN A 274   | 19.686 | -46.703 | -70.195 | 1.00 | 0.00 | A | N |
| ATOM | 1283 | CA GLN A 274  | 19.500 | -47.160 | -68.849 | 1.00 | 0.00 | A | C |
| ATOM | 1284 | CB GLN A 274  | 20.746 | -46.971 | -67.964 | 1.00 | 0.00 | A | C |
| ATOM | 1285 | CG GLN A 274  | 20.597 | -47.531 | -66.547 | 1.00 | 0.00 | A | C |
| ATOM | 1286 | CD GLN A 274  | 21.945 | -47.423 | -65.847 | 1.00 | 0.00 | A | C |
| ATOM | 1287 | OE1 GLN A 274 | 22.922 | -46.932 | -66.413 | 1.00 | 0.00 | A | O |
| ATOM | 1288 | NE2 GLN A 274 | 22.008 | -47.906 | -64.577 | 1.00 | 0.00 | A | N |
| ATOM | 1289 | C GLN A 274   | 18.379 | -46.360 | -68.272 | 1.00 | 0.00 | A | C |
| ATOM | 1290 | O GLN A 274   | 18.503 | -45.153 | -68.070 | 1.00 | 0.00 | A | O |
| ATOM | 1291 | N THR A 275   | 17.251 | -47.027 | -67.980 | 1.00 | 0.00 | A | N |
| ATOM | 1292 | CA THR A 275  | 16.126 | -46.324 | -67.444 | 1.00 | 0.00 | A | C |
| ATOM | 1293 | CB THR A 275  | 14.842 | -47.092 | -67.549 | 1.00 | 0.00 | A | C |
| ATOM | 1294 | OG1 THR A 275 | 14.936 | -48.304 | -66.813 | 1.00 | 0.00 | A | O |
| ATOM | 1295 | CG2 THR A 275 | 14.568 | -47.395 | -69.033 | 1.00 | 0.00 | A | C |
| ATOM | 1296 | C THR A 275   | 16.402 | -46.114 | -65.995 | 1.00 | 0.00 | A | C |
| ATOM | 1297 | O THR A 275   | 16.996 | -46.970 | -65.339 | 1.00 | 0.00 | A | O |
| ATOM | 1298 | N ALA A 276   | 15.981 | -44.954 | -65.459 | 1.00 | 0.00 | A | N |
| ATOM | 1299 | CA ALA A 276  | 16.219 | -44.683 | -64.076 | 1.00 | 0.00 | A | C |
| ATOM | 1300 | CB ALA A 276  | 15.998 | -43.208 | -63.690 | 1.00 | 0.00 | A | C |
| ATOM | 1301 | C ALA A 276   | 15.284 | -45.517 | -63.259 | 1.00 | 0.00 | A | C |
| ATOM | 1302 | O ALA A 276   | 14.175 | -45.831 | -63.685 | 1.00 | 0.00 | A | O |
| ATOM | 1303 | N ASP A 277   | 15.745 | -45.918 | -62.056 | 1.00 | 0.00 | A | N |
| ATOM | 1304 | CA ASP A 277  | 14.913 | -46.643 | -61.142 | 1.00 | 0.00 | A | C |
| ATOM | 1305 | CB ASP A 277  | 15.710 | -47.384 | -60.048 | 1.00 | 0.00 | A | C |
| ATOM | 1306 | CG ASP A 277  | 14.759 | -48.143 | -59.127 | 1.00 | 0.00 | A | C |
| ATOM | 1307 | OD1 ASP A 277 | 13.517 | -47.965 | -59.247 | 1.00 | 0.00 | A | O |
| ATOM | 1308 | OD2 ASP A 277 | 15.275 | -48.917 | -58.277 | 1.00 | 0.00 | A | O |
| ATOM | 1309 | C ASP A 277   | 14.104 | -45.584 | -60.465 | 1.00 | 0.00 | A | C |
| ATOM | 1310 | O ASP A 277   | 14.620 | -44.799 | -59.673 | 1.00 | 0.00 | A | O |

|      |      |     |           |        |         |         |      |      |   |   |
|------|------|-----|-----------|--------|---------|---------|------|------|---|---|
| ATOM | 1311 | N   | ILE A 278 | 12.797 | -45.555 | -60.763 | 1.00 | 0.00 | A | N |
| ATOM | 1312 | CA  | ILE A 278 | 11.912 | -44.543 | -60.267 | 1.00 | 0.00 | A | C |
| ATOM | 1313 | CB  | ILE A 278 | 10.528 | -44.657 | -60.836 | 1.00 | 0.00 | A | C |
| ATOM | 1314 | CG2 | ILE A 278 | 9.898  | -45.961 | -60.312 | 1.00 | 0.00 | A | C |
| ATOM | 1315 | CG1 | ILE A 278 | 9.712  | -43.391 | -60.518 | 1.00 | 0.00 | A | C |
| ATOM | 1316 | CD  | ILE A 278 | 10.217 | -42.140 | -61.233 | 1.00 | 0.00 | A | C |
| ATOM | 1317 | C   | ILE A 278 | 11.804 | -44.593 | -58.766 | 1.00 | 0.00 | A | C |
| ATOM | 1318 | O   | ILE A 278 | 11.535 | -43.574 | -58.136 | 1.00 | 0.00 | A | O |
| ATOM | 1319 | N   | SER A 279 | 11.876 | -45.798 | -58.170 | 1.00 | 0.00 | A | N |
| ATOM | 1320 | CA  | SER A 279 | 11.718 | -46.002 | -56.750 | 1.00 | 0.00 | A | C |
| ATOM | 1321 | CB  | SER A 279 | 11.125 | -47.384 | -56.427 | 1.00 | 0.00 | A | C |
| ATOM | 1322 | OG  | SER A 279 | 12.023 | -48.410 | -56.820 | 1.00 | 0.00 | A | O |
| ATOM | 1323 | C   | SER A 279 | 12.973 | -45.856 | -55.931 | 1.00 | 0.00 | A | C |
| ATOM | 1324 | O   | SER A 279 | 12.913 | -46.008 | -54.713 | 1.00 | 0.00 | A | O |
| ATOM | 1325 | N   | ALA A 280 | 14.146 | -45.580 | -56.529 | 1.00 | 0.00 | A | N |
| ATOM | 1326 | CA  | ALA A 280 | 15.354 | -45.597 | -55.741 | 1.00 | 0.00 | A | C |
| ATOM | 1327 | CB  | ALA A 280 | 16.619 | -45.281 | -56.557 | 1.00 | 0.00 | A | C |
| ATOM | 1328 | C   | ALA A 280 | 15.285 | -44.605 | -54.615 | 1.00 | 0.00 | A | C |
| ATOM | 1329 | O   | ALA A 280 | 14.611 | -43.580 | -54.694 | 1.00 | 0.00 | A | O |
| ATOM | 1330 | N   | ARG A 281 | 15.978 | -44.929 | -53.501 | 1.00 | 0.00 | A | N |
| ATOM | 1331 | CA  | ARG A 281 | 16.022 | -44.049 | -52.368 | 1.00 | 0.00 | A | C |
| ATOM | 1332 | CB  | ARG A 281 | 15.371 | -44.639 | -51.106 | 1.00 | 0.00 | A | C |
| ATOM | 1333 | CG  | ARG A 281 | 15.864 | -46.035 | -50.736 | 1.00 | 0.00 | A | C |
| ATOM | 1334 | CD  | ARG A 281 | 15.205 | -47.125 | -51.588 | 1.00 | 0.00 | A | C |
| ATOM | 1335 | NE  | ARG A 281 | 15.543 | -48.453 | -51.004 | 1.00 | 0.00 | A | N |
| ATOM | 1336 | CZ  | ARG A 281 | 14.735 | -49.007 | -50.053 | 1.00 | 0.00 | A | C |
| ATOM | 1337 | NH1 | ARG A 281 | 13.621 | -48.339 | -49.627 | 1.00 | 0.00 | A | N |
| ATOM | 1338 | NH2 | ARG A 281 | 15.033 | -50.232 | -49.529 | 1.00 | 0.00 | A | N |
| ATOM | 1339 | C   | ARG A 281 | 17.443 | -43.648 | -52.102 | 1.00 | 0.00 | A | C |
| ATOM | 1340 | O   | ARG A 281 | 18.372 | -44.431 | -52.286 | 1.00 | 0.00 | A | O |
| ATOM | 1341 | N   | ASP A 282 | 17.640 | -42.376 | -51.685 | 1.00 | 0.00 | A | N |
| ATOM | 1342 | CA  | ASP A 282 | 18.962 | -41.871 | -51.435 | 1.00 | 0.00 | A | C |
| ATOM | 1343 | CB  | ASP A 282 | 19.129 | -40.357 | -51.656 | 1.00 | 0.00 | A | C |
| ATOM | 1344 | CG  | ASP A 282 | 18.223 | -39.561 | -50.732 | 1.00 | 0.00 | A | C |
| ATOM | 1345 | OD1 | ASP A 282 | 17.708 | -40.115 | -49.724 | 1.00 | 0.00 | A | O |
| ATOM | 1346 | OD2 | ASP A 282 | 18.040 | -38.355 | -51.044 | 1.00 | 0.00 | A | O |
| ATOM | 1347 | C   | ASP A 282 | 19.383 | -42.256 | -50.050 | 1.00 | 0.00 | A | C |
| ATOM | 1348 | O   | ASP A 282 | 18.701 | -43.022 | -49.374 | 1.00 | 0.00 | A | O |



|      |      |     |           |        |         |         |      |      |   |   |
|------|------|-----|-----------|--------|---------|---------|------|------|---|---|
| ATOM | 1349 | N   | SER A 283 | 20.526 | -41.711 | -49.584 | 1.00 | 0.00 | A | N |
| ATOM | 1350 | CA  | SER A 283 | 21.103 | -42.116 | -48.332 | 1.00 | 0.00 | A | C |
| ATOM | 1351 | CB  | SER A 283 | 22.327 | -41.271 | -47.944 | 1.00 | 0.00 | A | C |
| ATOM | 1352 | OG  | SER A 283 | 23.367 | -41.459 | -48.892 | 1.00 | 0.00 | A | O |
| ATOM | 1353 | C   | SER A 283 | 20.097 | -41.957 | -47.229 | 1.00 | 0.00 | A | C |
| ATOM | 1354 | O   | SER A 283 | 20.030 | -42.784 | -46.319 | 1.00 | 0.00 | A | O |
| ATOM | 1355 | N   | VAL A 284 | 19.309 | -40.875 | -47.294 | 1.00 | 0.00 | A | N |
| ATOM | 1356 | CA  | VAL A 284 | 18.288 | -40.513 | -46.350 | 1.00 | 0.00 | A | C |
| ATOM | 1357 | CB  | VAL A 284 | 17.760 | -39.129 | -46.601 | 1.00 | 0.00 | A | C |
| ATOM | 1358 | CG1 | VAL A 284 | 16.576 | -38.866 | -45.655 | 1.00 | 0.00 | A | C |
| ATOM | 1359 | CG2 | VAL A 284 | 18.918 | -38.129 | -46.441 | 1.00 | 0.00 | A | C |
| ATOM | 1360 | C   | VAL A 284 | 17.131 | -41.468 | -46.429 | 1.00 | 0.00 | A | C |
| ATOM | 1361 | O   | VAL A 284 | 16.371 | -41.601 | -45.473 | 1.00 | 0.00 | A | O |
| ATOM | 1362 | N   | GLY A 285 | 16.928 | -42.134 | -47.583 | 1.00 | 0.00 | A | N |
| ATOM | 1363 | CA  | GLY A 285 | 15.803 | -43.017 | -47.722 | 1.00 | 0.00 | A | C |
| ATOM | 1364 | C   | GLY A 285 | 14.788 | -42.308 | -48.557 | 1.00 | 0.00 | A | C |
| ATOM | 1365 | O   | GLY A 285 | 13.729 | -42.847 | -48.872 | 1.00 | 0.00 | A | O |
| ATOM | 1366 | N   | ASN A 286 | 15.104 | -41.060 | -48.949 | 1.00 | 0.00 | A | N |
| ATOM | 1367 | CA  | ASN A 286 | 14.175 | -40.278 | -49.711 | 1.00 | 0.00 | A | C |
| ATOM | 1368 | CB  | ASN A 286 | 14.451 | -38.765 | -49.646 | 1.00 | 0.00 | A | C |
| ATOM | 1369 | CG  | ASN A 286 | 14.109 | -38.285 | -48.242 | 1.00 | 0.00 | A | C |
| ATOM | 1370 | OD1 | ASN A 286 | 13.368 | -38.939 | -47.511 | 1.00 | 0.00 | A | O |
| ATOM | 1371 | ND2 | ASN A 286 | 14.659 | -37.101 | -47.860 | 1.00 | 0.00 | A | N |
| ATOM | 1372 | C   | ASN A 286 | 14.186 | -40.668 | -51.151 | 1.00 | 0.00 | A | C |
| ATOM | 1373 | O   | ASN A 286 | 15.232 | -40.926 | -51.747 | 1.00 | 0.00 | A | O |
| ATOM | 1374 | N   | THR A 287 | 12.975 | -40.725 | -51.739 | 1.00 | 0.00 | A | N |
| ATOM | 1375 | CA  | THR A 287 | 12.812 | -40.966 | -53.141 | 1.00 | 0.00 | A | C |
| ATOM | 1376 | CB  | THR A 287 | 11.621 | -41.821 | -53.465 | 1.00 | 0.00 | A | C |
| ATOM | 1377 | OG1 | THR A 287 | 10.431 | -41.178 | -53.041 | 1.00 | 0.00 | A | O |
| ATOM | 1378 | CG2 | THR A 287 | 11.778 | -43.180 | -52.757 | 1.00 | 0.00 | A | C |
| ATOM | 1379 | C   | THR A 287 | 12.602 | -39.616 | -53.757 | 1.00 | 0.00 | A | C |
| ATOM | 1380 | O   | THR A 287 | 12.653 | -38.596 | -53.066 | 1.00 | 0.00 | A | O |
| ATOM | 1381 | N   | VAL A 288 | 12.350 | -39.581 | -55.081 | 1.00 | 0.00 | A | N |
| ATOM | 1382 | CA  | VAL A 288 | 12.169 | -38.331 | -55.766 | 1.00 | 0.00 | A | C |
| ATOM | 1383 | CB  | VAL A 288 | 11.929 | -38.468 | -57.246 | 1.00 | 0.00 | A | C |
| ATOM | 1384 | CG1 | VAL A 288 | 13.207 | -39.010 | -57.898 | 1.00 | 0.00 | A | C |
| ATOM | 1385 | CG2 | VAL A 288 | 10.699 | -39.355 | -57.484 | 1.00 | 0.00 | A | C |
| ATOM | 1386 | C   | VAL A 288 | 10.996 | -37.624 | -55.167 | 1.00 | 0.00 | A | C |

|      |      |     |           |        |         |         |      |      |   |   |
|------|------|-----|-----------|--------|---------|---------|------|------|---|---|
| ATOM | 1387 | O   | VAL A 288 | 10.991 | -36.396 | -55.078 | 1.00 | 0.00 | A | O |
| ATOM | 1388 | N   | LEU A 289 | 9.957  | -38.381 | -54.774 | 1.00 | 0.00 | A | N |
| ATOM | 1389 | CA  | LEU A 289 | 8.809  | -37.775 | -54.165 | 1.00 | 0.00 | A | C |
| ATOM | 1390 | CB  | LEU A 289 | 7.692  | -38.793 | -53.880 | 1.00 | 0.00 | A | C |
| ATOM | 1391 | CG  | LEU A 289 | 7.165  | -39.483 | -55.157 | 1.00 | 0.00 | A | C |
| ATOM | 1392 | CD1 | LEU A 289 | 5.966  | -40.397 | -54.852 | 1.00 | 0.00 | A | C |
| ATOM | 1393 | CD2 | LEU A 289 | 6.880  | -38.462 | -56.271 | 1.00 | 0.00 | A | C |
| ATOM | 1394 | C   | LEU A 289 | 9.240  | -37.153 | -52.866 | 1.00 | 0.00 | A | C |
| ATOM | 1395 | O   | LEU A 289 | 8.879  | -36.018 | -52.561 | 1.00 | 0.00 | A | O |
| ATOM | 1396 | N   | HSD A 290 | 10.054 | -37.869 | -52.063 | 1.00 | 0.00 | A | N |
| ATOM | 1397 | CA  | HSD A 290 | 10.479 | -37.305 | -50.811 | 1.00 | 0.00 | A | C |
| ATOM | 1398 | CB  | HSD A 290 | 11.353 | -38.253 | -49.971 | 1.00 | 0.00 | A | C |
| ATOM | 1399 | ND1 | HSD A 290 | 9.618  | -39.373 | -48.492 | 1.00 | 0.00 | A | N |
| ATOM | 1400 | CG  | HSD A 290 | 10.608 | -39.442 | -49.446 | 1.00 | 0.00 | A | C |
| ATOM | 1401 | CE1 | HSD A 290 | 9.200  | -40.645 | -48.267 | 1.00 | 0.00 | A | C |
| ATOM | 1402 | NE2 | HSD A 290 | 9.850  | -41.523 | -49.006 | 1.00 | 0.00 | A | N |
| ATOM | 1403 | CD2 | HSD A 290 | 10.737 | -40.763 | -49.751 | 1.00 | 0.00 | A | C |
| ATOM | 1404 | C   | HSD A 290 | 11.294 | -36.063 | -51.058 | 1.00 | 0.00 | A | C |
| ATOM | 1405 | O   | HSD A 290 | 11.100 | -35.039 | -50.404 | 1.00 | 0.00 | A | O |
| ATOM | 1406 | N   | ALA A 291 | 12.218 | -36.109 | -52.034 | 1.00 | 0.00 | A | N |
| ATOM | 1407 | CA  | ALA A 291 | 13.101 | -34.999 | -52.285 | 1.00 | 0.00 | A | C |
| ATOM | 1408 | CB  | ALA A 291 | 14.101 | -35.269 | -53.423 | 1.00 | 0.00 | A | C |
| ATOM | 1409 | C   | ALA A 291 | 12.307 | -33.783 | -52.667 | 1.00 | 0.00 | A | C |
| ATOM | 1410 | O   | ALA A 291 | 12.635 | -32.671 | -52.251 | 1.00 | 0.00 | A | O |
| ATOM | 1411 | N   | LEU A 292 | 11.241 | -33.961 | -53.470 | 1.00 | 0.00 | A | N |
| ATOM | 1412 | CA  | LEU A 292 | 10.431 | -32.864 | -53.927 | 1.00 | 0.00 | A | C |
| ATOM | 1413 | CB  | LEU A 292 | 9.302  | -33.319 | -54.866 | 1.00 | 0.00 | A | C |
| ATOM | 1414 | CG  | LEU A 292 | 9.800  | -33.740 | -56.260 | 1.00 | 0.00 | A | C |
| ATOM | 1415 | CD1 | LEU A 292 | 8.637  | -34.193 | -57.155 | 1.00 | 0.00 | A | C |
| ATOM | 1416 | CD2 | LEU A 292 | 10.624 | -32.611 | -56.905 | 1.00 | 0.00 | A | C |
| ATOM | 1417 | C   | LEU A 292 | 9.805  | -32.188 | -52.747 | 1.00 | 0.00 | A | C |
| ATOM | 1418 | O   | LEU A 292 | 9.754  | -30.962 | -52.680 | 1.00 | 0.00 | A | O |
| ATOM | 1419 | N   | VAL A 293 | 9.313  | -32.980 | -51.777 | 1.00 | 0.00 | A | N |
| ATOM | 1420 | CA  | VAL A 293 | 8.698  | -32.444 | -50.599 | 1.00 | 0.00 | A | C |
| ATOM | 1421 | CB  | VAL A 293 | 8.224  | -33.517 | -49.664 | 1.00 | 0.00 | A | C |
| ATOM | 1422 | CG1 | VAL A 293 | 7.721  | -32.856 | -48.369 | 1.00 | 0.00 | A | C |
| ATOM | 1423 | CG2 | VAL A 293 | 7.155  | -34.358 | -50.382 | 1.00 | 0.00 | A | C |
| ATOM | 1424 | C   | VAL A 293 | 9.726  | -31.631 | -49.876 | 1.00 | 0.00 | A | C |

|      |      |     |           |        |         |         |      |      |   |   |
|------|------|-----|-----------|--------|---------|---------|------|------|---|---|
| ATOM | 1425 | O   | VAL A 293 | 9.421  | -30.580 | -49.322 | 1.00 | 0.00 | A | O |
| ATOM | 1426 | N   | GLU A 294 | 10.983 | -32.108 | -49.858 | 1.00 | 0.00 | A | N |
| ATOM | 1427 | CA  | GLU A 294 | 12.032 | -31.431 | -49.148 | 1.00 | 0.00 | A | C |
| ATOM | 1428 | CB  | GLU A 294 | 13.332 | -32.252 | -49.076 | 1.00 | 0.00 | A | C |
| ATOM | 1429 | CG  | GLU A 294 | 14.233 | -31.809 | -47.926 | 1.00 | 0.00 | A | C |
| ATOM | 1430 | CD  | GLU A 294 | 13.536 | -32.249 | -46.645 | 1.00 | 0.00 | A | C |
| ATOM | 1431 | OE1 | GLU A 294 | 13.406 | -33.487 | -46.446 | 1.00 | 0.00 | A | O |
| ATOM | 1432 | OE2 | GLU A 294 | 13.112 | -31.360 | -45.863 | 1.00 | 0.00 | A | O |
| ATOM | 1433 | C   | GLU A 294 | 12.345 | -30.116 | -49.800 | 1.00 | 0.00 | A | C |
| ATOM | 1434 | O   | GLU A 294 | 12.731 | -29.160 | -49.131 | 1.00 | 0.00 | A | O |
| ATOM | 1435 | N   | VAL A 295 | 12.227 | -30.048 | -51.139 | 1.00 | 0.00 | A | N |
| ATOM | 1436 | CA  | VAL A 295 | 12.577 | -28.880 | -51.900 | 1.00 | 0.00 | A | C |
| ATOM | 1437 | CB  | VAL A 295 | 12.771 | -29.143 | -53.370 | 1.00 | 0.00 | A | C |
| ATOM | 1438 | CG1 | VAL A 295 | 11.410 | -29.274 | -54.068 | 1.00 | 0.00 | A | C |
| ATOM | 1439 | CG2 | VAL A 295 | 13.668 | -28.034 | -53.944 | 1.00 | 0.00 | A | C |
| ATOM | 1440 | C   | VAL A 295 | 11.578 | -27.761 | -51.728 | 1.00 | 0.00 | A | C |
| ATOM | 1441 | O   | VAL A 295 | 11.914 | -26.605 | -51.985 | 1.00 | 0.00 | A | O |
| ATOM | 1442 | N   | ALA A 296 | 10.311 | -28.062 | -51.362 | 1.00 | 0.00 | A | N |
| ATOM | 1443 | CA  | ALA A 296 | 9.292  | -27.042 | -51.274 | 1.00 | 0.00 | A | C |
| ATOM | 1444 | CB  | ALA A 296 | 7.881  | -27.616 | -51.059 | 1.00 | 0.00 | A | C |
| ATOM | 1445 | C   | ALA A 296 | 9.557  | -26.057 | -50.160 | 1.00 | 0.00 | A | C |
| ATOM | 1446 | O   | ALA A 296 | 9.928  | -26.438 | -49.051 | 1.00 | 0.00 | A | O |
| ATOM | 1447 | N   | ASP A 297 | 9.495  | -24.745 | -50.497 | 1.00 | 0.00 | A | N |
| ATOM | 1448 | CA  | ASP A 297 | 9.586  | -23.618 | -49.595 | 1.00 | 0.00 | A | C |
| ATOM | 1449 | CB  | ASP A 297 | 10.568 | -22.494 | -49.997 | 1.00 | 0.00 | A | C |
| ATOM | 1450 | CG  | ASP A 297 | 10.108 | -21.767 | -51.236 | 1.00 | 0.00 | A | C |
| ATOM | 1451 | OD1 | ASP A 297 | 9.672  | -22.457 | -52.185 | 1.00 | 0.00 | A | O |
| ATOM | 1452 | OD2 | ASP A 297 | 10.205 | -20.510 | -51.262 | 1.00 | 0.00 | A | O |
| ATOM | 1453 | C   | ASP A 297 | 8.263  | -23.020 | -49.178 | 1.00 | 0.00 | A | C |
| ATOM | 1454 | O   | ASP A 297 | 8.246  | -22.068 | -48.397 | 1.00 | 0.00 | A | O |
| ATOM | 1455 | N   | ASN A 298 | 7.127  | -23.472 | -49.745 | 1.00 | 0.00 | A | N |
| ATOM | 1456 | CA  | ASN A 298 | 5.835  | -22.918 | -49.427 | 1.00 | 0.00 | A | C |
| ATOM | 1457 | CB  | ASN A 298 | 5.569  | -22.829 | -47.915 | 1.00 | 0.00 | A | C |
| ATOM | 1458 | CG  | ASN A 298 | 5.377  | -24.254 | -47.417 | 1.00 | 0.00 | A | C |
| ATOM | 1459 | OD1 | ASN A 298 | 4.621  | -25.026 | -48.005 | 1.00 | 0.00 | A | O |
| ATOM | 1460 | ND2 | ASN A 298 | 6.088  | -24.621 | -46.317 | 1.00 | 0.00 | A | N |
| ATOM | 1461 | C   | ASN A 298 | 5.627  | -21.566 | -50.041 | 1.00 | 0.00 | A | C |
| ATOM | 1462 | O   | ASN A 298 | 4.816  | -20.774 | -49.558 | 1.00 | 0.00 | A | O |

|      |      |     |           |       |         |         |      |      |   |   |
|------|------|-----|-----------|-------|---------|---------|------|------|---|---|
| ATOM | 1463 | N   | THR A 299 | 6.347 | -21.259 | -51.135 | 1.00 | 0.00 | A | N |
| ATOM | 1464 | CA  | THR A 299 | 6.050 | -20.062 | -51.862 | 1.00 | 0.00 | A | C |
| ATOM | 1465 | CB  | THR A 299 | 7.255 | -19.443 | -52.503 | 1.00 | 0.00 | A | C |
| ATOM | 1466 | OG1 | THR A 299 | 6.919 | -18.186 | -53.059 | 1.00 | 0.00 | A | O |
| ATOM | 1467 | CG2 | THR A 299 | 7.784 | -20.371 | -53.598 | 1.00 | 0.00 | A | C |
| ATOM | 1468 | C   | THR A 299 | 5.081 | -20.497 | -52.923 | 1.00 | 0.00 | A | C |
| ATOM | 1469 | O   | THR A 299 | 5.035 | -21.675 | -53.271 | 1.00 | 0.00 | A | O |
| ATOM | 1470 | N   | ALA A 300 | 4.276 | -19.568 | -53.473 | 1.00 | 0.00 | A | N |
| ATOM | 1471 | CA  | ALA A 300 | 3.254 | -19.951 | -54.410 | 1.00 | 0.00 | A | C |
| ATOM | 1472 | CB  | ALA A 300 | 2.405 | -18.758 | -54.886 | 1.00 | 0.00 | A | C |
| ATOM | 1473 | C   | ALA A 300 | 3.862 | -20.581 | -55.624 | 1.00 | 0.00 | A | C |
| ATOM | 1474 | O   | ALA A 300 | 3.378 | -21.602 | -56.111 | 1.00 | 0.00 | A | O |
| ATOM | 1475 | N   | ASP A 301 | 4.953 | -19.990 | -56.137 | 1.00 | 0.00 | A | N |
| ATOM | 1476 | CA  | ASP A 301 | 5.589 | -20.462 | -57.334 | 1.00 | 0.00 | A | C |
| ATOM | 1477 | CB  | ASP A 301 | 6.762 | -19.557 | -57.746 | 1.00 | 0.00 | A | C |
| ATOM | 1478 | CG  | ASP A 301 | 6.203 | -18.179 | -58.077 | 1.00 | 0.00 | A | C |
| ATOM | 1479 | OD1 | ASP A 301 | 5.142 | -18.114 | -58.756 | 1.00 | 0.00 | A | O |
| ATOM | 1480 | OD2 | ASP A 301 | 6.820 | -17.173 | -57.639 | 1.00 | 0.00 | A | O |
| ATOM | 1481 | C   | ASP A 301 | 6.146 | -21.830 | -57.087 | 1.00 | 0.00 | A | C |
| ATOM | 1482 | O   | ASP A 301 | 6.114 | -22.688 | -57.969 | 1.00 | 0.00 | A | O |
| ATOM | 1483 | N   | ASN A 302 | 6.697 | -22.048 | -55.878 | 1.00 | 0.00 | A | N |
| ATOM | 1484 | CA  | ASN A 302 | 7.339 | -23.285 | -55.534 | 1.00 | 0.00 | A | C |
| ATOM | 1485 | CB  | ASN A 302 | 7.969 | -23.247 | -54.146 | 1.00 | 0.00 | A | C |
| ATOM | 1486 | CG  | ASN A 302 | 8.630 | -24.582 | -53.849 | 1.00 | 0.00 | A | C |
| ATOM | 1487 | OD1 | ASN A 302 | 7.961 | -25.536 | -53.454 | 1.00 | 0.00 | A | O |
| ATOM | 1488 | ND2 | ASN A 302 | 9.972 | -24.661 | -54.041 | 1.00 | 0.00 | A | N |
| ATOM | 1489 | C   | ASN A 302 | 6.370 | -24.413 | -55.503 | 1.00 | 0.00 | A | C |
| ATOM | 1490 | O   | ASN A 302 | 6.636 | -25.473 | -56.069 | 1.00 | 0.00 | A | O |
| ATOM | 1491 | N   | THR A 303 | 5.215 | -24.214 | -54.842 | 1.00 | 0.00 | A | N |
| ATOM | 1492 | CA  | THR A 303 | 4.282 | -25.293 | -54.741 | 1.00 | 0.00 | A | C |
| ATOM | 1493 | CB  | THR A 303 | 3.020 | -24.955 | -54.004 | 1.00 | 0.00 | A | C |
| ATOM | 1494 | OG1 | THR A 303 | 2.320 | -23.917 | -54.671 | 1.00 | 0.00 | A | O |
| ATOM | 1495 | CG2 | THR A 303 | 3.380 | -24.530 | -52.577 | 1.00 | 0.00 | A | C |
| ATOM | 1496 | C   | THR A 303 | 3.881 | -25.668 | -56.119 | 1.00 | 0.00 | A | C |
| ATOM | 1497 | O   | THR A 303 | 3.830 | -26.848 | -56.460 | 1.00 | 0.00 | A | O |
| ATOM | 1498 | N   | LYS A 304 | 3.640 | -24.660 | -56.974 | 1.00 | 0.00 | A | N |
| ATOM | 1499 | CA  | LYS A 304 | 3.127 | -24.938 | -58.278 | 1.00 | 0.00 | A | C |
| ATOM | 1500 | CB  | LYS A 304 | 2.961 | -23.675 | -59.145 | 1.00 | 0.00 | A | C |

|      |      |     |           |        |         |         |      |      |   |   |
|------|------|-----|-----------|--------|---------|---------|------|------|---|---|
| ATOM | 1501 | CG  | LYS A 304 | 1.918  | -22.700 | -58.596 | 1.00 | 0.00 | A | C |
| ATOM | 1502 | CD  | LYS A 304 | 0.520  | -23.307 | -58.451 | 1.00 | 0.00 | A | C |
| ATOM | 1503 | CE  | LYS A 304 | -0.492 | -22.376 | -57.779 | 1.00 | 0.00 | A | C |
| ATOM | 1504 | NZ  | LYS A 304 | -1.808 | -23.046 | -57.675 | 1.00 | 0.00 | A | N |
| ATOM | 1505 | C   | LYS A 304 | 4.057  | -25.857 | -59.009 | 1.00 | 0.00 | A | C |
| ATOM | 1506 | O   | LYS A 304 | 3.613  | -26.854 | -59.572 | 1.00 | 0.00 | A | O |
| ATOM | 1507 | N   | PHE A 305 | 5.372  | -25.567 | -59.024 | 1.00 | 0.00 | A | N |
| ATOM | 1508 | CA  | PHE A 305 | 6.233  | -26.411 | -59.805 | 1.00 | 0.00 | A | C |
| ATOM | 1509 | CB  | PHE A 305 | 7.622  | -25.813 | -60.122 | 1.00 | 0.00 | A | C |
| ATOM | 1510 | CG  | PHE A 305 | 8.528  | -25.891 | -58.946 | 1.00 | 0.00 | A | C |
| ATOM | 1511 | CD1 | PHE A 305 | 9.275  | -27.028 | -58.751 | 1.00 | 0.00 | A | C |
| ATOM | 1512 | CE1 | PHE A 305 | 10.129 | -27.133 | -57.681 | 1.00 | 0.00 | A | C |
| ATOM | 1513 | CZ  | PHE A 305 | 10.241 | -26.087 | -56.797 | 1.00 | 0.00 | A | C |
| ATOM | 1514 | CD2 | PHE A 305 | 8.648  | -24.843 | -58.064 | 1.00 | 0.00 | A | C |
| ATOM | 1515 | CE2 | PHE A 305 | 9.502  | -24.944 | -56.990 | 1.00 | 0.00 | A | C |
| ATOM | 1516 | C   | PHE A 305 | 6.405  | -27.766 | -59.169 | 1.00 | 0.00 | A | C |
| ATOM | 1517 | O   | PHE A 305 | 6.441  | -28.778 | -59.866 | 1.00 | 0.00 | A | O |
| ATOM | 1518 | N   | VAL A 306 | 6.539  | -27.830 | -57.827 | 1.00 | 0.00 | A | N |
| ATOM | 1519 | CA  | VAL A 306 | 6.750  | -29.095 | -57.170 | 1.00 | 0.00 | A | C |
| ATOM | 1520 | CB  | VAL A 306 | 6.995  | -28.950 | -55.697 | 1.00 | 0.00 | A | C |
| ATOM | 1521 | CG1 | VAL A 306 | 7.055  | -30.352 | -55.068 | 1.00 | 0.00 | A | C |
| ATOM | 1522 | CG2 | VAL A 306 | 8.283  | -28.132 | -55.502 | 1.00 | 0.00 | A | C |
| ATOM | 1523 | C   | VAL A 306 | 5.538  | -29.950 | -57.350 | 1.00 | 0.00 | A | C |
| ATOM | 1524 | O   | VAL A 306 | 5.635  | -31.137 | -57.659 | 1.00 | 0.00 | A | O |
| ATOM | 1525 | N   | THR A 307 | 4.354  | -29.333 | -57.204 | 1.00 | 0.00 | A | N |
| ATOM | 1526 | CA  | THR A 307 | 3.095  | -30.014 | -57.245 | 1.00 | 0.00 | A | C |
| ATOM | 1527 | CB  | THR A 307 | 1.962  | -29.031 | -57.125 | 1.00 | 0.00 | A | C |
| ATOM | 1528 | OG1 | THR A 307 | 1.929  | -28.470 | -55.822 | 1.00 | 0.00 | A | O |
| ATOM | 1529 | CG2 | THR A 307 | 0.639  | -29.698 | -57.501 | 1.00 | 0.00 | A | C |
| ATOM | 1530 | C   | THR A 307 | 2.926  | -30.768 | -58.530 | 1.00 | 0.00 | A | C |
| ATOM | 1531 | O   | THR A 307 | 2.532  | -31.932 | -58.513 | 1.00 | 0.00 | A | O |
| ATOM | 1532 | N   | SER A 308 | 3.196  | -30.112 | -59.670 | 1.00 | 0.00 | A | N |
| ATOM | 1533 | CA  | SER A 308 | 3.034  | -30.686 | -60.979 | 1.00 | 0.00 | A | C |
| ATOM | 1534 | CB  | SER A 308 | 3.113  | -29.619 | -62.082 | 1.00 | 0.00 | A | C |
| ATOM | 1535 | OG  | SER A 308 | 2.950  | -30.224 | -63.350 | 1.00 | 0.00 | A | O |
| ATOM | 1536 | C   | SER A 308 | 4.100  | -31.689 | -61.276 | 1.00 | 0.00 | A | C |
| ATOM | 1537 | O   | SER A 308 | 3.848  | -32.700 | -61.931 | 1.00 | 0.00 | A | O |
| ATOM | 1538 | N   | MET A 309 | 5.341  | -31.433 | -60.829 | 1.00 | 0.00 | A | N |

|      |      |     |     |   |     |        |         |         |      |      |   |   |
|------|------|-----|-----|---|-----|--------|---------|---------|------|------|---|---|
| ATOM | 1539 | CA  | MET | A | 309 | 6.397  | -32.356 | -61.118 | 1.00 | 0.00 | A | C |
| ATOM | 1540 | CB  | MET | A | 309 | 7.784  | -31.882 | -60.661 | 1.00 | 0.00 | A | C |
| ATOM | 1541 | CG  | MET | A | 309 | 8.883  | -32.889 | -61.003 | 1.00 | 0.00 | A | C |
| ATOM | 1542 | SD  | MET | A | 309 | 9.097  | -33.173 | -62.788 | 1.00 | 0.00 | A | S |
| ATOM | 1543 | CE  | MET | A | 309 | 9.520  | -31.456 | -63.196 | 1.00 | 0.00 | A | C |
| ATOM | 1544 | C   | MET | A | 309 | 6.079  | -33.632 | -60.412 | 1.00 | 0.00 | A | C |
| ATOM | 1545 | O   | MET | A | 309 | 6.368  | -34.716 | -60.910 | 1.00 | 0.00 | A | O |
| ATOM | 1546 | N   | TYR | A | 310 | 5.484  | -33.512 | -59.212 | 1.00 | 0.00 | A | N |
| ATOM | 1547 | CA  | TYR | A | 310 | 5.099  | -34.642 | -58.419 | 1.00 | 0.00 | A | C |
| ATOM | 1548 | CB  | TYR | A | 310 | 4.424  | -34.174 | -57.112 | 1.00 | 0.00 | A | C |
| ATOM | 1549 | CG  | TYR | A | 310 | 4.142  | -35.300 | -56.171 | 1.00 | 0.00 | A | C |
| ATOM | 1550 | CD1 | TYR | A | 310 | 5.114  | -35.742 | -55.304 | 1.00 | 0.00 | A | C |
| ATOM | 1551 | CE1 | TYR | A | 310 | 4.867  | -36.767 | -54.422 | 1.00 | 0.00 | A | C |
| ATOM | 1552 | CZ  | TYR | A | 310 | 3.629  | -37.364 | -54.394 | 1.00 | 0.00 | A | C |
| ATOM | 1553 | OH  | TYR | A | 310 | 3.368  | -38.416 | -53.490 | 1.00 | 0.00 | A | O |
| ATOM | 1554 | CD2 | TYR | A | 310 | 2.903  | -35.901 | -56.130 | 1.00 | 0.00 | A | C |
| ATOM | 1555 | CE2 | TYR | A | 310 | 2.648  | -36.928 | -55.250 | 1.00 | 0.00 | A | C |
| ATOM | 1556 | C   | TYR | A | 310 | 4.090  | -35.412 | -59.221 | 1.00 | 0.00 | A | C |
| ATOM | 1557 | O   | TYR | A | 310 | 4.208  | -36.625 | -59.389 | 1.00 | 0.00 | A | O |
| ATOM | 1558 | N   | ASN | A | 311 | 3.096  | -34.703 | -59.791 | 1.00 | 0.00 | A | N |
| ATOM | 1559 | CA  | ASN | A | 311 | 2.055  | -35.331 | -60.551 | 1.00 | 0.00 | A | C |
| ATOM | 1560 | CB  | ASN | A | 311 | 1.043  | -34.326 | -61.120 | 1.00 | 0.00 | A | C |
| ATOM | 1561 | CG  | ASN | A | 311 | -0.096 | -35.126 | -61.735 | 1.00 | 0.00 | A | C |
| ATOM | 1562 | OD1 | ASN | A | 311 | -0.129 | -36.352 | -61.641 | 1.00 | 0.00 | A | O |
| ATOM | 1563 | ND2 | ASN | A | 311 | -1.049 | -34.415 | -62.393 | 1.00 | 0.00 | A | N |
| ATOM | 1564 | C   | ASN | A | 311 | 2.681  | -36.036 | -61.708 | 1.00 | 0.00 | A | C |
| ATOM | 1565 | O   | ASN | A | 311 | 2.305  | -37.156 | -62.047 | 1.00 | 0.00 | A | O |
| ATOM | 1566 | N   | GLU | A | 312 | 3.677  | -35.388 | -62.335 | 1.00 | 0.00 | A | N |
| ATOM | 1567 | CA  | GLU | A | 312 | 4.325  | -35.932 | -63.489 | 1.00 | 0.00 | A | C |
| ATOM | 1568 | CB  | GLU | A | 312 | 5.421  | -35.009 | -64.044 | 1.00 | 0.00 | A | C |
| ATOM | 1569 | CG  | GLU | A | 312 | 4.868  | -33.825 | -64.831 | 1.00 | 0.00 | A | C |
| ATOM | 1570 | CD  | GLU | A | 312 | 4.293  | -34.401 | -66.114 | 1.00 | 0.00 | A | C |
| ATOM | 1571 | OE1 | GLU | A | 312 | 4.862  | -35.409 | -66.607 | 1.00 | 0.00 | A | O |
| ATOM | 1572 | OE2 | GLU | A | 312 | 3.276  | -33.851 | -66.613 | 1.00 | 0.00 | A | O |
| ATOM | 1573 | C   | GLU | A | 312 | 4.987  | -37.224 | -63.139 | 1.00 | 0.00 | A | C |
| ATOM | 1574 | O   | GLU | A | 312 | 4.928  | -38.177 | -63.909 | 1.00 | 0.00 | A | O |
| ATOM | 1575 | N   | ILE | A | 313 | 5.634  | -37.301 | -61.964 | 1.00 | 0.00 | A | N |
| ATOM | 1576 | CA  | ILE | A | 313 | 6.337  | -38.496 | -61.602 | 1.00 | 0.00 | A | C |

|      |      |     |     |   |     |       |         |         |      |      |   |   |
|------|------|-----|-----|---|-----|-------|---------|---------|------|------|---|---|
| ATOM | 1577 | CB  | ILE | A | 313 | 7.037 | -38.374 | -60.279 | 1.00 | 0.00 | A | C |
| ATOM | 1578 | CG2 | ILE | A | 313 | 7.514 | -39.776 | -59.868 | 1.00 | 0.00 | A | C |
| ATOM | 1579 | CG1 | ILE | A | 313 | 8.168 | -37.331 | -60.353 | 1.00 | 0.00 | A | C |
| ATOM | 1580 | CD  | ILE | A | 313 | 9.271 | -37.698 | -61.344 | 1.00 | 0.00 | A | C |
| ATOM | 1581 | C   | ILE | A | 313 | 5.363 | -39.623 | -61.490 | 1.00 | 0.00 | A | C |
| ATOM | 1582 | O   | ILE | A | 313 | 5.622 | -40.724 | -61.972 | 1.00 | 0.00 | A | O |
| ATOM | 1583 | N   | LEU | A | 314 | 4.207 | -39.376 | -60.845 | 1.00 | 0.00 | A | N |
| ATOM | 1584 | CA  | LEU | A | 314 | 3.252 | -40.428 | -60.652 | 1.00 | 0.00 | A | C |
| ATOM | 1585 | CB  | LEU | A | 314 | 2.074 | -40.035 | -59.745 | 1.00 | 0.00 | A | C |
| ATOM | 1586 | CG  | LEU | A | 314 | 2.481 | -39.833 | -58.271 | 1.00 | 0.00 | A | C |
| ATOM | 1587 | CD1 | LEU | A | 314 | 1.258 | -39.535 | -57.390 | 1.00 | 0.00 | A | C |
| ATOM | 1588 | CD2 | LEU | A | 314 | 3.307 | -41.020 | -57.749 | 1.00 | 0.00 | A | C |
| ATOM | 1589 | C   | LEU | A | 314 | 2.714 | -40.902 | -61.972 | 1.00 | 0.00 | A | C |
| ATOM | 1590 | O   | LEU | A | 314 | 2.597 | -42.105 | -62.197 | 1.00 | 0.00 | A | O |
| ATOM | 1591 | N   | MET | A | 315 | 2.411 | -39.976 | -62.901 | 1.00 | 0.00 | A | N |
| ATOM | 1592 | CA  | MET | A | 315 | 1.850 | -40.360 | -64.165 | 1.00 | 0.00 | A | C |
| ATOM | 1593 | CB  | MET | A | 315 | 1.596 | -39.149 | -65.082 | 1.00 | 0.00 | A | C |
| ATOM | 1594 | CG  | MET | A | 315 | 0.553 | -38.179 | -64.521 | 1.00 | 0.00 | A | C |
| ATOM | 1595 | SD  | MET | A | 315 | 0.218 | -36.735 | -65.571 | 1.00 | 0.00 | A | S |
| ATOM | 1596 | CE  | MET | A | 315 | 1.846 | -35.975 | -65.301 | 1.00 | 0.00 | A | C |
| ATOM | 1597 | C   | MET | A | 315 | 2.831 | -41.263 | -64.847 | 1.00 | 0.00 | A | C |
| ATOM | 1598 | O   | MET | A | 315 | 2.455 | -42.242 | -65.486 | 1.00 | 0.00 | A | O |
| ATOM | 1599 | N   | LEU | A | 316 | 4.128 | -40.937 | -64.746 | 1.00 | 0.00 | A | N |
| ATOM | 1600 | CA  | LEU | A | 316 | 5.170 | -41.734 | -65.332 | 1.00 | 0.00 | A | C |
| ATOM | 1601 | CB  | LEU | A | 316 | 6.552 | -41.049 | -65.289 | 1.00 | 0.00 | A | C |
| ATOM | 1602 | CG  | LEU | A | 316 | 6.792 | -39.997 | -66.398 | 1.00 | 0.00 | A | C |
| ATOM | 1603 | CD1 | LEU | A | 316 | 5.715 | -38.905 | -66.425 | 1.00 | 0.00 | A | C |
| ATOM | 1604 | CD2 | LEU | A | 316 | 8.206 | -39.398 | -66.294 | 1.00 | 0.00 | A | C |
| ATOM | 1605 | C   | LEU | A | 316 | 5.261 | -43.064 | -64.642 | 1.00 | 0.00 | A | C |
| ATOM | 1606 | O   | LEU | A | 316 | 5.500 | -44.085 | -65.286 | 1.00 | 0.00 | A | O |
| ATOM | 1607 | N   | GLY | A | 317 | 5.096 | -43.088 | -63.306 | 1.00 | 0.00 | A | N |
| ATOM | 1608 | CA  | GLY | A | 317 | 5.200 | -44.337 | -62.605 | 1.00 | 0.00 | A | C |
| ATOM | 1609 | C   | GLY | A | 317 | 4.116 | -45.251 | -63.080 | 1.00 | 0.00 | A | C |
| ATOM | 1610 | O   | GLY | A | 317 | 4.360 | -46.419 | -63.378 | 1.00 | 0.00 | A | O |
| ATOM | 1611 | N   | ALA | A | 318 | 2.878 | -44.732 | -63.180 | 1.00 | 0.00 | A | N |
| ATOM | 1612 | CA  | ALA | A | 318 | 1.766 | -45.549 | -63.562 | 1.00 | 0.00 | A | C |
| ATOM | 1613 | CB  | ALA | A | 318 | 0.430 | -44.790 | -63.506 | 1.00 | 0.00 | A | C |
| ATOM | 1614 | C   | ALA | A | 318 | 1.951 | -46.046 | -64.961 | 1.00 | 0.00 | A | C |

|      |      |     |           |       |         |         |      |      |   |   |
|------|------|-----|-----------|-------|---------|---------|------|------|---|---|
| ATOM | 1615 | O   | ALA A 318 | 1.669 | -47.206 | -65.253 | 1.00 | 0.00 | A | O |
| ATOM | 1616 | N   | LYS A 319 | 2.399 | -45.182 | -65.888 | 1.00 | 0.00 | A | N |
| ATOM | 1617 | CA  | LYS A 319 | 2.540 | -45.680 | -67.223 | 1.00 | 0.00 | A | C |
| ATOM | 1618 | CB  | LYS A 319 | 2.769 | -44.574 | -68.273 | 1.00 | 0.00 | A | C |
| ATOM | 1619 | CG  | LYS A 319 | 3.972 | -43.663 | -68.032 | 1.00 | 0.00 | A | C |
| ATOM | 1620 | CD  | LYS A 319 | 4.323 | -42.808 | -69.251 | 1.00 | 0.00 | A | C |
| ATOM | 1621 | CE  | LYS A 319 | 5.517 | -41.879 | -69.040 | 1.00 | 0.00 | A | C |
| ATOM | 1622 | NZ  | LYS A 319 | 5.724 | -41.056 | -70.252 | 1.00 | 0.00 | A | N |
| ATOM | 1623 | C   | LYS A 319 | 3.640 | -46.703 | -67.316 | 1.00 | 0.00 | A | C |
| ATOM | 1624 | O   | LYS A 319 | 3.417 | -47.803 | -67.821 | 1.00 | 0.00 | A | O |
| ATOM | 1625 | N   | LEU A 320 | 4.856 | -46.377 | -66.831 | 1.00 | 0.00 | A | N |
| ATOM | 1626 | CA  | LEU A 320 | 5.964 | -47.284 | -66.960 | 1.00 | 0.00 | A | C |
| ATOM | 1627 | CB  | LEU A 320 | 7.330 | -46.613 | -66.711 | 1.00 | 0.00 | A | C |
| ATOM | 1628 | CG  | LEU A 320 | 7.768 | -45.669 | -67.854 | 1.00 | 0.00 | A | C |
| ATOM | 1629 | CD1 | LEU A 320 | 6.802 | -44.489 | -68.027 | 1.00 | 0.00 | A | C |
| ATOM | 1630 | CD2 | LEU A 320 | 9.223 | -45.202 | -67.686 | 1.00 | 0.00 | A | C |
| ATOM | 1631 | C   | LEU A 320 | 5.856 | -48.499 | -66.081 | 1.00 | 0.00 | A | C |
| ATOM | 1632 | O   | LEU A 320 | 6.036 | -49.616 | -66.562 | 1.00 | 0.00 | A | O |
| ATOM | 1633 | N   | HSD A 321 | 5.556 | -48.334 | -64.773 | 1.00 | 0.00 | A | N |
| ATOM | 1634 | CA  | HSD A 321 | 5.507 | -49.492 | -63.913 | 1.00 | 0.00 | A | C |
| ATOM | 1635 | CB  | HSD A 321 | 6.745 | -49.592 | -63.007 | 1.00 | 0.00 | A | C |
| ATOM | 1636 | ND1 | HSD A 321 | 8.590 | -50.653 | -64.397 | 1.00 | 0.00 | A | N |
| ATOM | 1637 | CG  | HSD A 321 | 8.012 | -49.551 | -63.810 | 1.00 | 0.00 | A | C |
| ATOM | 1638 | CE1 | HSD A 321 | 9.691 | -50.212 | -65.055 | 1.00 | 0.00 | A | C |
| ATOM | 1639 | NE2 | HSD A 321 | 9.862 | -48.908 | -64.933 | 1.00 | 0.00 | A | N |
| ATOM | 1640 | CD2 | HSD A 321 | 8.802 | -48.492 | -64.147 | 1.00 | 0.00 | A | C |
| ATOM | 1641 | C   | HSD A 321 | 4.306 | -49.347 | -63.023 | 1.00 | 0.00 | A | C |
| ATOM | 1642 | O   | HSD A 321 | 4.380 | -48.743 | -61.954 | 1.00 | 0.00 | A | O |
| ATOM | 1643 | N   | PRO A 322 | 3.207 | -49.915 | -63.432 | 1.00 | 0.00 | A | N |
| ATOM | 1644 | CD  | PRO A 322 | 2.995 | -50.223 | -64.834 | 1.00 | 0.00 | A | C |
| ATOM | 1645 | CA  | PRO A 322 | 1.965 | -49.759 | -62.721 | 1.00 | 0.00 | A | C |
| ATOM | 1646 | CB  | PRO A 322 | 0.863 | -50.191 | -63.695 | 1.00 | 0.00 | A | C |
| ATOM | 1647 | CG  | PRO A 322 | 1.604 | -50.872 | -64.862 | 1.00 | 0.00 | A | C |
| ATOM | 1648 | C   | PRO A 322 | 1.866 | -50.407 | -61.378 | 1.00 | 0.00 | A | C |
| ATOM | 1649 | O   | PRO A 322 | 1.072 | -49.946 | -60.560 | 1.00 | 0.00 | A | O |
| ATOM | 1650 | N   | THR A 323 | 2.646 | -51.469 | -61.124 | 1.00 | 0.00 | A | N |
| ATOM | 1651 | CA  | THR A 323 | 2.524 | -52.217 | -59.911 | 1.00 | 0.00 | A | C |
| ATOM | 1652 | CB  | THR A 323 | 3.385 | -53.439 | -59.909 | 1.00 | 0.00 | A | C |



|      |      |               |        |         |         |      |      |   |   |
|------|------|---------------|--------|---------|---------|------|------|---|---|
| ATOM | 1653 | OG1 THR A 323 | 3.084  | -54.246 | -61.038 | 1.00 | 0.00 | A | O |
| ATOM | 1654 | CG2 THR A 323 | 3.097  | -54.220 | -58.618 | 1.00 | 0.00 | A | C |
| ATOM | 1655 | C THR A 323   | 2.937  | -51.398 | -58.728 | 1.00 | 0.00 | A | C |
| ATOM | 1656 | O THR A 323   | 2.353  | -51.522 | -57.651 | 1.00 | 0.00 | A | O |
| ATOM | 1657 | N LEU A 324   | 3.956  | -50.537 | -58.901 | 1.00 | 0.00 | A | N |
| ATOM | 1658 | CA LEU A 324  | 4.562  | -49.859 | -57.790 | 1.00 | 0.00 | A | C |
| ATOM | 1659 | CB LEU A 324  | 5.842  | -49.108 | -58.187 | 1.00 | 0.00 | A | C |
| ATOM | 1660 | CG LEU A 324  | 6.874  | -49.987 | -58.915 | 1.00 | 0.00 | A | C |
| ATOM | 1661 | CD1 LEU A 324 | 8.219  | -49.258 | -59.034 | 1.00 | 0.00 | A | C |
| ATOM | 1662 | CD2 LEU A 324 | 6.985  | -51.385 | -58.291 | 1.00 | 0.00 | A | C |
| ATOM | 1663 | C LEU A 324   | 3.644  | -48.850 | -57.170 | 1.00 | 0.00 | A | C |
| ATOM | 1664 | O LEU A 324   | 3.059  | -48.012 | -57.852 | 1.00 | 0.00 | A | O |
| ATOM | 1665 | N LYS A 325   | 3.508  | -48.913 | -55.825 | 1.00 | 0.00 | A | N |
| ATOM | 1666 | CA LYS A 325  | 2.762  | -47.903 | -55.132 | 1.00 | 0.00 | A | C |
| ATOM | 1667 | CB LYS A 325  | 1.871  | -48.421 | -53.986 | 1.00 | 0.00 | A | C |
| ATOM | 1668 | CG LYS A 325  | 0.616  | -49.142 | -54.486 | 1.00 | 0.00 | A | C |
| ATOM | 1669 | CD LYS A 325  | -0.255 | -49.746 | -53.381 | 1.00 | 0.00 | A | C |
| ATOM | 1670 | CE LYS A 325  | -1.568 | -50.330 | -53.910 | 1.00 | 0.00 | A | C |
| ATOM | 1671 | NZ LYS A 325  | -2.371 | -50.886 | -52.798 | 1.00 | 0.00 | A | N |
| ATOM | 1672 | C LYS A 325   | 3.792  | -46.977 | -54.560 | 1.00 | 0.00 | A | C |
| ATOM | 1673 | O LYS A 325   | 4.321  | -47.192 | -53.469 | 1.00 | 0.00 | A | O |
| ATOM | 1674 | N LEU A 326   | 4.086  | -45.903 | -55.313 | 1.00 | 0.00 | A | N |
| ATOM | 1675 | CA LEU A 326  | 5.137  | -44.980 | -54.993 | 1.00 | 0.00 | A | C |
| ATOM | 1676 | CB LEU A 326  | 5.422  | -43.957 | -56.111 | 1.00 | 0.00 | A | C |
| ATOM | 1677 | CG LEU A 326  | 6.122  | -44.535 | -57.359 | 1.00 | 0.00 | A | C |
| ATOM | 1678 | CD1 LEU A 326 | 5.234  | -45.540 | -58.107 | 1.00 | 0.00 | A | C |
| ATOM | 1679 | CD2 LEU A 326 | 6.639  | -43.416 | -58.276 | 1.00 | 0.00 | A | C |
| ATOM | 1680 | C LEU A 326   | 4.892  | -44.197 | -53.738 | 1.00 | 0.00 | A | C |
| ATOM | 1681 | O LEU A 326   | 5.817  | -43.963 | -52.964 | 1.00 | 0.00 | A | O |
| ATOM | 1682 | N GLU A 327   | 3.645  | -43.763 | -53.491 | 1.00 | 0.00 | A | N |
| ATOM | 1683 | CA GLU A 327  | 3.371  | -42.886 | -52.383 | 1.00 | 0.00 | A | C |
| ATOM | 1684 | CB GLU A 327  | 1.955  | -42.292 | -52.420 | 1.00 | 0.00 | A | C |
| ATOM | 1685 | CG GLU A 327  | 1.822  | -41.236 | -53.519 | 1.00 | 0.00 | A | C |
| ATOM | 1686 | CD GLU A 327  | 0.421  | -40.648 | -53.473 | 1.00 | 0.00 | A | C |
| ATOM | 1687 | OE1 GLU A 327 | -0.538 | -41.376 | -53.848 | 1.00 | 0.00 | A | O |
| ATOM | 1688 | OE2 GLU A 327 | 0.290  | -39.464 | -53.066 | 1.00 | 0.00 | A | O |
| ATOM | 1689 | C GLU A 327   | 3.599  | -43.552 | -51.063 | 1.00 | 0.00 | A | C |
| ATOM | 1690 | O GLU A 327   | 3.780  | -42.884 | -50.045 | 1.00 | 0.00 | A | O |

|      |      |     |           |        |         |         |      |      |   |   |
|------|------|-----|-----------|--------|---------|---------|------|------|---|---|
| ATOM | 1691 | N   | GLU A 328 | 3.508  | -44.887 | -51.030 | 1.00 | 0.00 | A | N |
| ATOM | 1692 | CA  | GLU A 328 | 3.664  | -45.673 | -49.841 | 1.00 | 0.00 | A | C |
| ATOM | 1693 | CB  | GLU A 328 | 3.109  | -47.091 | -50.032 | 1.00 | 0.00 | A | C |
| ATOM | 1694 | CG  | GLU A 328 | 1.583  | -47.049 | -50.166 | 1.00 | 0.00 | A | C |
| ATOM | 1695 | CD  | GLU A 328 | 1.058  | -48.441 | -50.480 | 1.00 | 0.00 | A | C |
| ATOM | 1696 | OE1 | GLU A 328 | 1.838  | -49.267 | -51.023 | 1.00 | 0.00 | A | O |
| ATOM | 1697 | OE2 | GLU A 328 | -0.140 | -48.690 | -50.188 | 1.00 | 0.00 | A | O |
| ATOM | 1698 | C   | GLU A 328 | 5.088  | -45.750 | -49.335 | 1.00 | 0.00 | A | C |
| ATOM | 1699 | O   | GLU A 328 | 5.286  | -45.968 | -48.141 | 1.00 | 0.00 | A | O |
| ATOM | 1700 | N   | LEU A 329 | 6.117  | -45.609 | -50.202 | 1.00 | 0.00 | A | N |
| ATOM | 1701 | CA  | LEU A 329 | 7.495  | -45.823 | -49.807 | 1.00 | 0.00 | A | C |
| ATOM | 1702 | CB  | LEU A 329 | 8.491  | -45.725 | -50.978 | 1.00 | 0.00 | A | C |
| ATOM | 1703 | CG  | LEU A 329 | 8.305  | -46.813 | -52.053 | 1.00 | 0.00 | A | C |
| ATOM | 1704 | CD1 | LEU A 329 | 6.938  | -46.689 | -52.745 | 1.00 | 0.00 | A | C |
| ATOM | 1705 | CD2 | LEU A 329 | 9.477  | -46.817 | -53.050 | 1.00 | 0.00 | A | C |
| ATOM | 1706 | C   | LEU A 329 | 7.961  | -44.855 | -48.750 | 1.00 | 0.00 | A | C |
| ATOM | 1707 | O   | LEU A 329 | 7.872  | -43.638 | -48.907 | 1.00 | 0.00 | A | O |
| ATOM | 1708 | N   | THR A 330 | 8.537  | -45.410 | -47.653 | 1.00 | 0.00 | A | N |
| ATOM | 1709 | CA  | THR A 330 | 8.972  | -44.651 | -46.508 | 1.00 | 0.00 | A | C |
| ATOM | 1710 | CB  | THR A 330 | 8.765  | -45.383 | -45.216 | 1.00 | 0.00 | A | C |
| ATOM | 1711 | OG1 | THR A 330 | 9.572  | -46.552 | -45.190 | 1.00 | 0.00 | A | O |
| ATOM | 1712 | CG2 | THR A 330 | 7.281  | -45.765 | -45.100 | 1.00 | 0.00 | A | C |
| ATOM | 1713 | C   | THR A 330 | 10.441 | -44.349 | -46.578 | 1.00 | 0.00 | A | C |
| ATOM | 1714 | O   | THR A 330 | 11.241 | -45.162 | -47.034 | 1.00 | 0.00 | A | O |
| ATOM | 1715 | N   | ASN A 331 | 10.825 | -43.148 | -46.084 | 1.00 | 0.00 | A | N |
| ATOM | 1716 | CA  | ASN A 331 | 12.202 | -42.747 | -46.021 | 1.00 | 0.00 | A | C |
| ATOM | 1717 | CB  | ASN A 331 | 12.417 | -41.215 | -46.000 | 1.00 | 0.00 | A | C |
| ATOM | 1718 | CG  | ASN A 331 | 11.780 | -40.606 | -44.758 | 1.00 | 0.00 | A | C |
| ATOM | 1719 | OD1 | ASN A 331 | 11.195 | -41.294 | -43.925 | 1.00 | 0.00 | A | O |
| ATOM | 1720 | ND2 | ASN A 331 | 11.886 | -39.255 | -44.639 | 1.00 | 0.00 | A | N |
| ATOM | 1721 | C   | ASN A 331 | 12.782 | -43.361 | -44.779 | 1.00 | 0.00 | A | C |
| ATOM | 1722 | O   | ASN A 331 | 12.115 | -44.127 | -44.088 | 1.00 | 0.00 | A | O |
| ATOM | 1723 | N   | LYS A 332 | 14.043 | -43.026 | -44.453 | 1.00 | 0.00 | A | N |
| ATOM | 1724 | CA  | LYS A 332 | 14.757 | -43.628 | -43.357 | 1.00 | 0.00 | A | C |
| ATOM | 1725 | CB  | LYS A 332 | 16.061 | -42.872 | -43.067 | 1.00 | 0.00 | A | C |
| ATOM | 1726 | CG  | LYS A 332 | 16.950 | -43.453 | -41.970 | 1.00 | 0.00 | A | C |
| ATOM | 1727 | CD  | LYS A 332 | 18.224 | -42.622 | -41.766 | 1.00 | 0.00 | A | C |
| ATOM | 1728 | CE  | LYS A 332 | 18.846 | -42.115 | -43.072 | 1.00 | 0.00 | A | C |

|      |      |     |     |   |     |        |         |         |      |      |   |   |
|------|------|-----|-----|---|-----|--------|---------|---------|------|------|---|---|
| ATOM | 1729 | NZ  | LYS | A | 332 | 19.821 | -41.037 | -42.786 | 1.00 | 0.00 | A | N |
| ATOM | 1730 | C   | LYS | A | 332 | 13.940 | -43.496 | -42.108 | 1.00 | 0.00 | A | C |
| ATOM | 1731 | O   | LYS | A | 332 | 13.796 | -44.449 | -41.342 | 1.00 | 0.00 | A | O |
| ATOM | 1732 | N   | LYS | A | 333 | 13.366 | -42.307 | -41.885 | 1.00 | 0.00 | A | N |
| ATOM | 1733 | CA  | LYS | A | 333 | 12.626 | -41.987 | -40.698 | 1.00 | 0.00 | A | C |
| ATOM | 1734 | CB  | LYS | A | 333 | 12.235 | -40.502 | -40.622 | 1.00 | 0.00 | A | C |
| ATOM | 1735 | CG  | LYS | A | 333 | 13.453 | -39.587 | -40.487 | 1.00 | 0.00 | A | C |
| ATOM | 1736 | CD  | LYS | A | 333 | 13.147 | -38.107 | -40.711 | 1.00 | 0.00 | A | C |
| ATOM | 1737 | CE  | LYS | A | 333 | 14.398 | -37.228 | -40.700 | 1.00 | 0.00 | A | C |
| ATOM | 1738 | NZ  | LYS | A | 333 | 15.156 | -37.453 | -39.450 | 1.00 | 0.00 | A | N |
| ATOM | 1739 | C   | LYS | A | 333 | 11.377 | -42.817 | -40.616 | 1.00 | 0.00 | A | C |
| ATOM | 1740 | O   | LYS | A | 333 | 10.798 | -42.957 | -39.542 | 1.00 | 0.00 | A | O |
| ATOM | 1741 | N   | GLY | A | 334 | 10.897 | -43.368 | -41.746 | 1.00 | 0.00 | A | N |
| ATOM | 1742 | CA  | GLY | A | 334 | 9.683  | -44.132 | -41.686 | 1.00 | 0.00 | A | C |
| ATOM | 1743 | C   | GLY | A | 334 | 8.574  | -43.271 | -42.191 | 1.00 | 0.00 | A | C |
| ATOM | 1744 | O   | GLY | A | 334 | 7.400  | -43.553 | -41.956 | 1.00 | 0.00 | A | O |
| ATOM | 1745 | N   | MET | A | 335 | 8.924  | -42.192 | -42.921 | 1.00 | 0.00 | A | N |
| ATOM | 1746 | CA  | MET | A | 335 | 7.908  | -41.287 | -43.372 | 1.00 | 0.00 | A | C |
| ATOM | 1747 | CB  | MET | A | 335 | 8.291  | -39.813 | -43.158 | 1.00 | 0.00 | A | C |
| ATOM | 1748 | CG  | MET | A | 335 | 8.498  | -39.447 | -41.687 | 1.00 | 0.00 | A | C |
| ATOM | 1749 | SD  | MET | A | 335 | 8.970  | -37.715 | -41.391 | 1.00 | 0.00 | A | S |
| ATOM | 1750 | CE  | MET | A | 335 | 9.442  | -37.972 | -39.656 | 1.00 | 0.00 | A | C |
| ATOM | 1751 | C   | MET | A | 335 | 7.644  | -41.451 | -44.840 | 1.00 | 0.00 | A | C |
| ATOM | 1752 | O   | MET | A | 335 | 8.555  | -41.553 | -45.660 | 1.00 | 0.00 | A | O |
| ATOM | 1753 | N   | THR | A | 336 | 6.341  | -41.485 | -45.192 | 1.00 | 0.00 | A | N |
| ATOM | 1754 | CA  | THR | A | 336 | 5.928  | -41.487 | -46.564 | 1.00 | 0.00 | A | C |
| ATOM | 1755 | CB  | THR | A | 336 | 4.493  | -41.873 | -46.771 | 1.00 | 0.00 | A | C |
| ATOM | 1756 | OG1 | THR | A | 336 | 3.634  | -40.941 | -46.130 | 1.00 | 0.00 | A | O |
| ATOM | 1757 | CG2 | THR | A | 336 | 4.270  | -43.286 | -46.205 | 1.00 | 0.00 | A | C |
| ATOM | 1758 | C   | THR | A | 336 | 6.078  | -40.060 | -46.987 | 1.00 | 0.00 | A | C |
| ATOM | 1759 | O   | THR | A | 336 | 6.246  | -39.187 | -46.137 | 1.00 | 0.00 | A | O |
| ATOM | 1760 | N   | PRO | A | 337 | 6.028  | -39.770 | -48.261 | 1.00 | 0.00 | A | N |
| ATOM | 1761 | CD  | PRO | A | 337 | 6.181  | -40.760 | -49.312 | 1.00 | 0.00 | A | C |
| ATOM | 1762 | CA  | PRO | A | 337 | 6.205  | -38.424 | -48.728 | 1.00 | 0.00 | A | C |
| ATOM | 1763 | CB  | PRO | A | 337 | 6.103  | -38.508 | -50.249 | 1.00 | 0.00 | A | C |
| ATOM | 1764 | CG  | PRO | A | 337 | 6.562  | -39.947 | -50.564 | 1.00 | 0.00 | A | C |
| ATOM | 1765 | C   | PRO | A | 337 | 5.211  | -37.514 | -48.077 | 1.00 | 0.00 | A | C |
| ATOM | 1766 | O   | PRO | A | 337 | 5.593  | -36.434 | -47.636 | 1.00 | 0.00 | A | O |

|      |      |     |     |   |     |        |         |         |      |      |   |   |
|------|------|-----|-----|---|-----|--------|---------|---------|------|------|---|---|
| ATOM | 1767 | N   | LEU | A | 338 | 3.946  | -37.949 | -47.958 | 1.00 | 0.00 | A | N |
| ATOM | 1768 | CA  | LEU | A | 338 | 2.923  | -37.138 | -47.367 | 1.00 | 0.00 | A | C |
| ATOM | 1769 | CB  | LEU | A | 338 | 1.578  | -37.882 | -47.315 | 1.00 | 0.00 | A | C |
| ATOM | 1770 | CG  | LEU | A | 338 | 0.433  | -37.079 | -46.678 | 1.00 | 0.00 | A | C |
| ATOM | 1771 | CD1 | LEU | A | 338 | 0.021  | -35.887 | -47.555 | 1.00 | 0.00 | A | C |
| ATOM | 1772 | CD2 | LEU | A | 338 | -0.741 | -38.000 | -46.317 | 1.00 | 0.00 | A | C |
| ATOM | 1773 | C   | LEU | A | 338 | 3.302  | -36.834 | -45.953 | 1.00 | 0.00 | A | C |
| ATOM | 1774 | O   | LEU | A | 338 | 3.246  | -35.688 | -45.515 | 1.00 | 0.00 | A | O |
| ATOM | 1775 | N   | ALA | A | 339 | 3.741  | -37.864 | -45.207 | 1.00 | 0.00 | A | N |
| ATOM | 1776 | CA  | ALA | A | 339 | 4.032  | -37.722 | -43.809 | 1.00 | 0.00 | A | C |
| ATOM | 1777 | CB  | ALA | A | 339 | 4.467  | -39.046 | -43.159 | 1.00 | 0.00 | A | C |
| ATOM | 1778 | C   | ALA | A | 339 | 5.146  | -36.742 | -43.620 | 1.00 | 0.00 | A | C |
| ATOM | 1779 | O   | ALA | A | 339 | 5.143  | -35.970 | -42.664 | 1.00 | 0.00 | A | O |
| ATOM | 1780 | N   | LEU | A | 340 | 6.147  | -36.780 | -44.517 | 1.00 | 0.00 | A | N |
| ATOM | 1781 | CA  | LEU | A | 340 | 7.283  | -35.904 | -44.432 | 1.00 | 0.00 | A | C |
| ATOM | 1782 | CB  | LEU | A | 340 | 8.303  | -36.213 | -45.548 | 1.00 | 0.00 | A | C |
| ATOM | 1783 | CG  | LEU | A | 340 | 9.708  | -35.587 | -45.401 | 1.00 | 0.00 | A | C |
| ATOM | 1784 | CD1 | LEU | A | 340 | 10.543 | -35.843 | -46.665 | 1.00 | 0.00 | A | C |
| ATOM | 1785 | CD2 | LEU | A | 340 | 9.685  | -34.107 | -45.005 | 1.00 | 0.00 | A | C |
| ATOM | 1786 | C   | LEU | A | 340 | 6.795  | -34.498 | -44.619 | 1.00 | 0.00 | A | C |
| ATOM | 1787 | O   | LEU | A | 340 | 7.141  | -33.601 | -43.852 | 1.00 | 0.00 | A | O |
| ATOM | 1788 | N   | ALA | A | 341 | 5.914  | -34.285 | -45.617 | 1.00 | 0.00 | A | N |
| ATOM | 1789 | CA  | ALA | A | 341 | 5.470  | -32.956 | -45.928 | 1.00 | 0.00 | A | C |
| ATOM | 1790 | CB  | ALA | A | 341 | 4.414  | -32.934 | -47.047 | 1.00 | 0.00 | A | C |
| ATOM | 1791 | C   | ALA | A | 341 | 4.845  | -32.362 | -44.704 | 1.00 | 0.00 | A | C |
| ATOM | 1792 | O   | ALA | A | 341 | 5.077  | -31.194 | -44.396 | 1.00 | 0.00 | A | O |
| ATOM | 1793 | N   | ALA | A | 342 | 4.029  | -33.158 | -43.989 | 1.00 | 0.00 | A | N |
| ATOM | 1794 | CA  | ALA | A | 342 | 3.343  | -32.732 | -42.797 | 1.00 | 0.00 | A | C |
| ATOM | 1795 | CB  | ALA | A | 342 | 2.313  | -33.759 | -42.315 | 1.00 | 0.00 | A | C |
| ATOM | 1796 | C   | ALA | A | 342 | 4.307  | -32.480 | -41.677 | 1.00 | 0.00 | A | C |
| ATOM | 1797 | O   | ALA | A | 342 | 4.107  | -31.573 | -40.870 | 1.00 | 0.00 | A | O |
| ATOM | 1798 | N   | GLY | A | 343 | 5.359  | -33.311 | -41.557 | 1.00 | 0.00 | A | N |
| ATOM | 1799 | CA  | GLY | A | 343 | 6.304  | -33.113 | -40.496 | 1.00 | 0.00 | A | C |
| ATOM | 1800 | C   | GLY | A | 343 | 6.998  | -31.789 | -40.681 | 1.00 | 0.00 | A | C |
| ATOM | 1801 | O   | GLY | A | 343 | 7.295  | -31.090 | -39.713 | 1.00 | 0.00 | A | O |
| ATOM | 1802 | N   | THR | A | 344 | 7.331  | -31.460 | -41.943 | 1.00 | 0.00 | A | N |
| ATOM | 1803 | CA  | THR | A | 344 | 8.071  | -30.301 | -42.387 | 1.00 | 0.00 | A | C |
| ATOM | 1804 | CB  | THR | A | 344 | 8.803  | -30.582 | -43.676 | 1.00 | 0.00 | A | C |

|      |      |               |        |         |         |      |      |   |   |
|------|------|---------------|--------|---------|---------|------|------|---|---|
| ATOM | 1805 | OG1 THR A 344 | 9.590  | -31.753 | -43.519 | 1.00 | 0.00 | A | O |
| ATOM | 1806 | CG2 THR A 344 | 9.762  | -29.422 | -43.993 | 1.00 | 0.00 | A | C |
| ATOM | 1807 | C THR A 344   | 7.248  | -29.041 | -42.525 | 1.00 | 0.00 | A | C |
| ATOM | 1808 | O THR A 344   | 7.806  | -27.973 | -42.768 | 1.00 | 0.00 | A | O |
| ATOM | 1809 | N GLY A 345   | 5.901  | -29.109 | -42.510 | 1.00 | 0.00 | A | N |
| ATOM | 1810 | CA GLY A 345  | 5.149  | -27.888 | -42.630 | 1.00 | 0.00 | A | C |
| ATOM | 1811 | C GLY A 345   | 5.120  | -27.434 | -44.062 | 1.00 | 0.00 | A | C |
| ATOM | 1812 | O GLY A 345   | 5.081  | -26.233 | -44.334 | 1.00 | 0.00 | A | O |
| ATOM | 1813 | N LYS A 346   | 5.176  | -28.376 | -45.025 | 1.00 | 0.00 | A | N |
| ATOM | 1814 | CA LYS A 346  | 5.055  | -27.976 | -46.405 | 1.00 | 0.00 | A | C |
| ATOM | 1815 | CB LYS A 346  | 5.950  | -28.775 | -47.371 | 1.00 | 0.00 | A | C |
| ATOM | 1816 | CG LYS A 346  | 7.367  | -28.205 | -47.477 | 1.00 | 0.00 | A | C |
| ATOM | 1817 | CD LYS A 346  | 8.177  | -28.255 | -46.185 | 1.00 | 0.00 | A | C |
| ATOM | 1818 | CE LYS A 346  | 9.553  | -27.593 | -46.297 | 1.00 | 0.00 | A | C |
| ATOM | 1819 | NZ LYS A 346  | 10.432 | -28.384 | -47.188 | 1.00 | 0.00 | A | N |
| ATOM | 1820 | C LYS A 346   | 3.620  | -28.188 | -46.778 | 1.00 | 0.00 | A | C |
| ATOM | 1821 | O LYS A 346   | 3.262  | -29.173 | -47.419 | 1.00 | 0.00 | A | O |
| ATOM | 1822 | N ILE A 347   | 2.785  | -27.195 | -46.409 | 1.00 | 0.00 | A | N |
| ATOM | 1823 | CA ILE A 347  | 1.349  | -27.255 | -46.467 | 1.00 | 0.00 | A | C |
| ATOM | 1824 | CB ILE A 347  | 0.674  | -26.056 | -45.862 | 1.00 | 0.00 | A | C |
| ATOM | 1825 | CG2 ILE A 347 | -0.838 | -26.220 | -46.105 | 1.00 | 0.00 | A | C |
| ATOM | 1826 | CG1 ILE A 347 | 1.026  | -25.888 | -44.376 | 1.00 | 0.00 | A | C |
| ATOM | 1827 | CD ILE A 347  | 2.462  | -25.430 | -44.125 | 1.00 | 0.00 | A | C |
| ATOM | 1828 | C ILE A 347   | 0.791  | -27.341 | -47.851 | 1.00 | 0.00 | A | C |
| ATOM | 1829 | O ILE A 347   | -0.092 | -28.155 | -48.111 | 1.00 | 0.00 | A | O |
| ATOM | 1830 | N GLY A 348   | 1.281  | -26.506 | -48.781 | 1.00 | 0.00 | A | N |
| ATOM | 1831 | CA GLY A 348  | 0.668  | -26.452 | -50.076 | 1.00 | 0.00 | A | C |
| ATOM | 1832 | C GLY A 348   | 0.734  | -27.805 | -50.703 | 1.00 | 0.00 | A | C |
| ATOM | 1833 | O GLY A 348   | -0.210 | -28.241 | -51.360 | 1.00 | 0.00 | A | O |
| ATOM | 1834 | N VAL A 349   | 1.880  | -28.487 | -50.541 | 1.00 | 0.00 | A | N |
| ATOM | 1835 | CA VAL A 349  | 2.104  | -29.787 | -51.104 | 1.00 | 0.00 | A | C |
| ATOM | 1836 | CB VAL A 349  | 3.538  | -30.222 | -50.977 | 1.00 | 0.00 | A | C |
| ATOM | 1837 | CG1 VAL A 349 | 3.689  | -31.623 | -51.594 | 1.00 | 0.00 | A | C |
| ATOM | 1838 | CG2 VAL A 349 | 4.430  | -29.157 | -51.637 | 1.00 | 0.00 | A | C |
| ATOM | 1839 | C VAL A 349   | 1.244  | -30.799 | -50.411 | 1.00 | 0.00 | A | C |
| ATOM | 1840 | O VAL A 349   | 0.641  | -31.656 | -51.052 | 1.00 | 0.00 | A | O |
| ATOM | 1841 | N LEU A 350   | 1.153  | -30.701 | -49.071 | 1.00 | 0.00 | A | N |
| ATOM | 1842 | CA LEU A 350  | 0.395  | -31.651 | -48.309 | 1.00 | 0.00 | A | C |

|      |      |     |     |   |     |        |         |         |      |      |   |   |
|------|------|-----|-----|---|-----|--------|---------|---------|------|------|---|---|
| ATOM | 1843 | CB  | LEU | A | 350 | 0.411  | -31.292 | -46.808 | 1.00 | 0.00 | A | C |
| ATOM | 1844 | CG  | LEU | A | 350 | -0.197 | -32.321 | -45.828 | 1.00 | 0.00 | A | C |
| ATOM | 1845 | CD1 | LEU | A | 350 | -0.090 | -31.799 | -44.387 | 1.00 | 0.00 | A | C |
| ATOM | 1846 | CD2 | LEU | A | 350 | -1.638 | -32.726 | -46.178 | 1.00 | 0.00 | A | C |
| ATOM | 1847 | C   | LEU | A | 350 | -1.017 | -31.599 | -48.815 | 1.00 | 0.00 | A | C |
| ATOM | 1848 | O   | LEU | A | 350 | -1.634 | -32.631 | -49.079 | 1.00 | 0.00 | A | O |
| ATOM | 1849 | N   | ALA | A | 351 | -1.557 | -30.379 | -49.002 | 1.00 | 0.00 | A | N |
| ATOM | 1850 | CA  | ALA | A | 351 | -2.904 | -30.228 | -49.470 | 1.00 | 0.00 | A | C |
| ATOM | 1851 | CB  | ALA | A | 351 | -3.313 | -28.752 | -49.610 | 1.00 | 0.00 | A | C |
| ATOM | 1852 | C   | ALA | A | 351 | -2.998 | -30.850 | -50.828 | 1.00 | 0.00 | A | C |
| ATOM | 1853 | O   | ALA | A | 351 | -3.981 | -31.509 | -51.158 | 1.00 | 0.00 | A | O |
| ATOM | 1854 | N   | TYR | A | 352 | -1.955 | -30.646 | -51.647 | 1.00 | 0.00 | A | N |
| ATOM | 1855 | CA  | TYR | A | 352 | -1.897 | -31.141 | -52.990 | 1.00 | 0.00 | A | C |
| ATOM | 1856 | CB  | TYR | A | 352 | -0.616 | -30.652 | -53.677 | 1.00 | 0.00 | A | C |
| ATOM | 1857 | CG  | TYR | A | 352 | -0.305 | -31.537 | -54.829 | 1.00 | 0.00 | A | C |
| ATOM | 1858 | CD1 | TYR | A | 352 | -1.066 | -31.529 | -55.972 | 1.00 | 0.00 | A | C |
| ATOM | 1859 | CE1 | TYR | A | 352 | -0.735 | -32.354 | -57.023 | 1.00 | 0.00 | A | C |
| ATOM | 1860 | CZ  | TYR | A | 352 | 0.356  | -33.185 | -56.937 | 1.00 | 0.00 | A | C |
| ATOM | 1861 | OH  | TYR | A | 352 | 0.698  | -34.028 | -58.015 | 1.00 | 0.00 | A | O |
| ATOM | 1862 | CD2 | TYR | A | 352 | 0.782  | -32.373 | -54.747 | 1.00 | 0.00 | A | C |
| ATOM | 1863 | CE2 | TYR | A | 352 | 1.116  | -33.197 | -55.793 | 1.00 | 0.00 | A | C |
| ATOM | 1864 | C   | TYR | A | 352 | -1.933 | -32.637 | -53.022 | 1.00 | 0.00 | A | C |
| ATOM | 1865 | O   | TYR | A | 352 | -2.661 | -33.216 | -53.823 | 1.00 | 0.00 | A | O |
| ATOM | 1866 | N   | ILE | A | 353 | -1.153 | -33.319 | -52.165 | 1.00 | 0.00 | A | N |
| ATOM | 1867 | CA  | ILE | A | 353 | -1.106 | -34.752 | -52.232 | 1.00 | 0.00 | A | C |
| ATOM | 1868 | CB  | ILE | A | 353 | -0.017 | -35.362 | -51.394 | 1.00 | 0.00 | A | C |
| ATOM | 1869 | CG2 | ILE | A | 353 | -0.234 | -36.885 | -51.356 | 1.00 | 0.00 | A | C |
| ATOM | 1870 | CG1 | ILE | A | 353 | 1.361  | -34.955 | -51.946 | 1.00 | 0.00 | A | C |
| ATOM | 1871 | CD  | ILE | A | 353 | 2.527  | -35.356 | -51.042 | 1.00 | 0.00 | A | C |
| ATOM | 1872 | C   | ILE | A | 353 | -2.412 | -35.366 | -51.845 | 1.00 | 0.00 | A | C |
| ATOM | 1873 | O   | ILE | A | 353 | -2.839 | -36.336 | -52.463 | 1.00 | 0.00 | A | O |
| ATOM | 1874 | N   | LEU | A | 354 | -3.044 | -34.863 | -50.768 | 1.00 | 0.00 | A | N |
| ATOM | 1875 | CA  | LEU | A | 354 | -4.293 | -35.379 | -50.274 | 1.00 | 0.00 | A | C |
| ATOM | 1876 | CB  | LEU | A | 354 | -4.637 | -34.800 | -48.898 | 1.00 | 0.00 | A | C |
| ATOM | 1877 | CG  | LEU | A | 354 | -3.604 | -35.142 | -47.810 | 1.00 | 0.00 | A | C |
| ATOM | 1878 | CD1 | LEU | A | 354 | -3.990 | -34.493 | -46.474 | 1.00 | 0.00 | A | C |
| ATOM | 1879 | CD2 | LEU | A | 354 | -3.384 | -36.658 | -47.688 | 1.00 | 0.00 | A | C |
| ATOM | 1880 | C   | LEU | A | 354 | -5.434 | -35.018 | -51.181 | 1.00 | 0.00 | A | C |

|      |      |     |           |         |         |         |      |      |   |   |
|------|------|-----|-----------|---------|---------|---------|------|------|---|---|
| ATOM | 1881 | O   | LEU A 354 | -6.394  | -35.756 | -51.332 | 1.00 | 0.00 | A | O |
| ATOM | 1882 | N   | GLN A 355 | -5.441  | -33.784 | -51.685 | 1.00 | 0.00 | A | N |
| ATOM | 1883 | CA  | GLN A 355 | -6.464  | -33.223 | -52.520 | 1.00 | 0.00 | A | C |
| ATOM | 1884 | CB  | GLN A 355 | -6.681  | -31.728 | -52.243 | 1.00 | 0.00 | A | C |
| ATOM | 1885 | CG  | GLN A 355 | -7.503  | -31.479 | -50.967 | 1.00 | 0.00 | A | C |
| ATOM | 1886 | CD  | GLN A 355 | -6.936  | -32.306 | -49.818 | 1.00 | 0.00 | A | C |
| ATOM | 1887 | OE1 | GLN A 355 | -6.091  | -31.848 | -49.054 | 1.00 | 0.00 | A | O |
| ATOM | 1888 | NE2 | GLN A 355 | -7.409  | -33.578 | -49.699 | 1.00 | 0.00 | A | N |
| ATOM | 1889 | C   | GLN A 355 | -6.277  | -33.456 | -53.983 | 1.00 | 0.00 | A | C |
| ATOM | 1890 | O   | GLN A 355 | -7.163  | -33.090 | -54.746 | 1.00 | 0.00 | A | O |
| ATOM | 1891 | N   | ARG A 356 | -5.094  | -33.929 | -54.430 | 1.00 | 0.00 | A | N |
| ATOM | 1892 | CA  | ARG A 356 | -4.780  | -34.005 | -55.835 | 1.00 | 0.00 | A | C |
| ATOM | 1893 | CB  | ARG A 356 | -3.358  | -34.501 | -56.135 | 1.00 | 0.00 | A | C |
| ATOM | 1894 | CG  | ARG A 356 | -3.070  | -34.578 | -57.635 | 1.00 | 0.00 | A | C |
| ATOM | 1895 | CD  | ARG A 356 | -1.938  | -35.537 | -58.007 | 1.00 | 0.00 | A | C |
| ATOM | 1896 | NE  | ARG A 356 | -2.404  | -36.915 | -57.684 | 1.00 | 0.00 | A | N |
| ATOM | 1897 | CZ  | ARG A 356 | -1.829  | -37.610 | -56.659 | 1.00 | 0.00 | A | C |
| ATOM | 1898 | NH1 | ARG A 356 | -0.768  | -37.076 | -55.987 | 1.00 | 0.00 | A | N |
| ATOM | 1899 | NH2 | ARG A 356 | -2.311  | -38.837 | -56.312 | 1.00 | 0.00 | A | N |
| ATOM | 1900 | C   | ARG A 356 | -5.656  | -34.994 | -56.530 | 1.00 | 0.00 | A | C |
| ATOM | 1901 | O   | ARG A 356 | -5.219  | -36.099 | -56.852 | 1.00 | 0.00 | A | O |
| ATOM | 1902 | N   | GLU A 357 | -6.891  | -34.574 | -56.854 | 1.00 | 0.00 | A | N |
| ATOM | 1903 | CA  | GLU A 357 | -7.847  | -35.403 | -57.523 | 1.00 | 0.00 | A | C |
| ATOM | 1904 | CB  | GLU A 357 | -9.231  | -34.748 | -57.618 | 1.00 | 0.00 | A | C |
| ATOM | 1905 | CG  | GLU A 357 | -9.149  | -33.452 | -58.434 | 1.00 | 0.00 | A | C |
| ATOM | 1906 | CD  | GLU A 357 | -10.546 | -32.909 | -58.686 | 1.00 | 0.00 | A | C |
| ATOM | 1907 | OE1 | GLU A 357 | -11.303 | -32.728 | -57.697 | 1.00 | 0.00 | A | O |
| ATOM | 1908 | OE2 | GLU A 357 | -10.872 | -32.663 | -59.879 | 1.00 | 0.00 | A | O |
| ATOM | 1909 | C   | GLU A 357 | -7.384  | -35.512 | -58.937 | 1.00 | 0.00 | A | C |
| ATOM | 1910 | O   | GLU A 357 | -6.829  | -34.559 | -59.485 | 1.00 | 0.00 | A | O |
| ATOM | 1911 | N   | ILE A 358 | -7.580  | -36.680 | -59.581 | 1.00 | 0.00 | A | N |
| ATOM | 1912 | CA  | ILE A 358 | -7.144  | -36.738 | -60.942 | 1.00 | 0.00 | A | C |
| ATOM | 1913 | CB  | ILE A 358 | -5.824  | -37.444 | -61.085 | 1.00 | 0.00 | A | C |
| ATOM | 1914 | CG2 | ILE A 358 | -6.056  | -38.942 | -60.829 | 1.00 | 0.00 | A | C |
| ATOM | 1915 | CG1 | ILE A 358 | -5.149  | -37.091 | -62.423 | 1.00 | 0.00 | A | C |
| ATOM | 1916 | CD  | ILE A 358 | -4.716  | -35.629 | -62.540 | 1.00 | 0.00 | A | C |
| ATOM | 1917 | C   | ILE A 358 | -8.213  | -37.427 | -61.744 | 1.00 | 0.00 | A | C |
| ATOM | 1918 | O   | ILE A 358 | -8.852  | -38.362 | -61.262 | 1.00 | 0.00 | A | O |

|      |      |     |           |         |         |         |      |      |   |   |
|------|------|-----|-----------|---------|---------|---------|------|------|---|---|
| ATOM | 1919 | N   | GLN A 359 | -8.470  | -36.953 | -62.983 | 1.00 | 0.00 | A | N |
| ATOM | 1920 | CA  | GLN A 359 | -9.484  | -37.582 | -63.787 | 1.00 | 0.00 | A | C |
| ATOM | 1921 | CB  | GLN A 359 | -10.744 | -36.721 | -63.985 | 1.00 | 0.00 | A | C |
| ATOM | 1922 | CG  | GLN A 359 | -11.819 | -37.405 | -64.834 | 1.00 | 0.00 | A | C |
| ATOM | 1923 | CD  | GLN A 359 | -12.449 | -38.525 | -64.013 | 1.00 | 0.00 | A | C |
| ATOM | 1924 | OE1 | GLN A 359 | -11.895 | -38.964 | -63.004 | 1.00 | 0.00 | A | O |
| ATOM | 1925 | NE2 | GLN A 359 | -13.640 | -39.005 | -64.457 | 1.00 | 0.00 | A | N |
| ATOM | 1926 | C   | GLN A 359 | -8.903  | -37.861 | -65.139 | 1.00 | 0.00 | A | C |
| ATOM | 1927 | O   | GLN A 359 | -8.414  | -36.961 | -65.823 | 1.00 | 0.00 | A | O |
| ATOM | 1928 | N   | GLU A 360 | -8.954  | -39.149 | -65.545 | 1.00 | 0.00 | A | N |
| ATOM | 1929 | CA  | GLU A 360 | -8.387  | -39.626 | -66.776 | 1.00 | 0.00 | A | C |
| ATOM | 1930 | CB  | GLU A 360 | -6.876  | -39.290 | -66.864 | 1.00 | 0.00 | A | C |
| ATOM | 1931 | CG  | GLU A 360 | -6.114  | -39.684 | -68.131 | 1.00 | 0.00 | A | C |
| ATOM | 1932 | CD  | GLU A 360 | -5.413  | -41.000 | -67.834 | 1.00 | 0.00 | A | C |
| ATOM | 1933 | OE1 | GLU A 360 | -4.933  | -41.162 | -66.680 | 1.00 | 0.00 | A | O |
| ATOM | 1934 | OE2 | GLU A 360 | -5.346  | -41.860 | -68.752 | 1.00 | 0.00 | A | O |
| ATOM | 1935 | C   | GLU A 360 | -8.606  | -41.114 | -66.735 | 1.00 | 0.00 | A | C |
| ATOM | 1936 | O   | GLU A 360 | -9.108  | -41.619 | -65.729 | 1.00 | 0.00 | A | O |
| ATOM | 1937 | N   | PRO A 361 | -8.262  | -41.856 | -67.755 | 1.00 | 0.00 | A | N |
| ATOM | 1938 | CD  | PRO A 361 | -8.411  | -41.361 | -69.117 | 1.00 | 0.00 | A | C |
| ATOM | 1939 | CA  | PRO A 361 | -8.531  | -43.264 | -67.703 | 1.00 | 0.00 | A | C |
| ATOM | 1940 | CB  | PRO A 361 | -8.237  | -43.793 | -69.102 | 1.00 | 0.00 | A | C |
| ATOM | 1941 | CG  | PRO A 361 | -8.633  | -42.604 | -69.998 | 1.00 | 0.00 | A | C |
| ATOM | 1942 | C   | PRO A 361 | -7.917  | -44.038 | -66.585 | 1.00 | 0.00 | A | C |
| ATOM | 1943 | O   | PRO A 361 | -8.427  | -45.094 | -66.252 | 1.00 | 0.00 | A | O |
| ATOM | 1944 | N   | GLU A 362 | -6.804  | -43.665 | -65.971 | 1.00 | 0.00 | A | N |
| ATOM | 1945 | CA  | GLU A 362 | -6.597  | -44.562 | -64.873 | 1.00 | 0.00 | A | C |
| ATOM | 1946 | CB  | GLU A 362 | -5.245  | -45.288 | -64.936 | 1.00 | 0.00 | A | C |
| ATOM | 1947 | CG  | GLU A 362 | -5.086  | -46.160 | -66.183 | 1.00 | 0.00 | A | C |
| ATOM | 1948 | CD  | GLU A 362 | -4.669  | -45.248 | -67.331 | 1.00 | 0.00 | A | C |
| ATOM | 1949 | OE1 | GLU A 362 | -3.591  | -44.608 | -67.212 | 1.00 | 0.00 | A | O |
| ATOM | 1950 | OE2 | GLU A 362 | -5.424  | -45.176 | -68.339 | 1.00 | 0.00 | A | O |
| ATOM | 1951 | C   | GLU A 362 | -6.557  | -43.682 | -63.683 | 1.00 | 0.00 | A | C |
| ATOM | 1952 | O   | GLU A 362 | -5.773  | -43.888 | -62.760 | 1.00 | 0.00 | A | O |
| ATOM | 1953 | N   | CYS A 363 | -7.409  | -42.653 | -63.676 | 1.00 | 0.00 | A | N |
| ATOM | 1954 | CA  | CYS A 363 | -7.339  | -41.684 | -62.627 | 1.00 | 0.00 | A | C |
| ATOM | 1955 | CB  | CYS A 363 | -7.905  | -40.318 | -62.999 | 1.00 | 0.00 | A | C |
| ATOM | 1956 | SG  | CYS A 363 | -6.592  | -39.391 | -63.822 | 1.00 | 0.00 | A | S |



|      |      |     |           |         |         |         |      |      |   |   |
|------|------|-----|-----------|---------|---------|---------|------|------|---|---|
| ATOM | 1957 | C   | CYS A 363 | -7.876  | -42.078 | -61.288 | 1.00 | 0.00 | A | C |
| ATOM | 1958 | O   | CYS A 363 | -7.321  | -41.668 | -60.272 | 1.00 | 0.00 | A | O |
| ATOM | 1959 | N   | ARG A 364 | -8.947  | -42.882 | -61.234 | 1.00 | 0.00 | A | N |
| ATOM | 1960 | CA  | ARG A 364 | -9.639  | -43.074 | -59.989 | 1.00 | 0.00 | A | C |
| ATOM | 1961 | CB  | ARG A 364 | -10.896 | -43.957 | -60.134 | 1.00 | 0.00 | A | C |
| ATOM | 1962 | CG  | ARG A 364 | -11.730 | -44.083 | -58.852 | 1.00 | 0.00 | A | C |
| ATOM | 1963 | CD  | ARG A 364 | -13.003 | -44.920 | -59.034 | 1.00 | 0.00 | A | C |
| ATOM | 1964 | NE  | ARG A 364 | -13.599 | -45.165 | -57.687 | 1.00 | 0.00 | A | N |
| ATOM | 1965 | CZ  | ARG A 364 | -14.487 | -44.285 | -57.138 | 1.00 | 0.00 | A | C |
| ATOM | 1966 | NH1 | ARG A 364 | -14.827 | -43.143 | -57.806 | 1.00 | 0.00 | A | N |
| ATOM | 1967 | NH2 | ARG A 364 | -15.048 | -44.551 | -55.921 | 1.00 | 0.00 | A | N |
| ATOM | 1968 | C   | ARG A 364 | -8.759  | -43.658 | -58.926 | 1.00 | 0.00 | A | C |
| ATOM | 1969 | O   | ARG A 364 | -8.819  | -43.224 | -57.778 | 1.00 | 0.00 | A | O |
| ATOM | 1970 | N   | HSD A 365 | -7.908  | -44.647 | -59.251 | 1.00 | 0.00 | A | N |
| ATOM | 1971 | CA  | HSD A 365 | -7.129  | -45.261 | -58.211 | 1.00 | 0.00 | A | C |
| ATOM | 1972 | CB  | HSD A 365 | -6.301  | -46.465 | -58.685 | 1.00 | 0.00 | A | C |
| ATOM | 1973 | ND1 | HSD A 365 | -5.175  | -45.323 | -60.629 | 1.00 | 0.00 | A | N |
| ATOM | 1974 | CG  | HSD A 365 | -5.101  | -46.058 | -59.472 | 1.00 | 0.00 | A | C |
| ATOM | 1975 | CE1 | HSD A 365 | -3.904  | -45.146 | -61.064 | 1.00 | 0.00 | A | C |
| ATOM | 1976 | NE2 | HSD A 365 | -3.020  | -45.717 | -60.268 | 1.00 | 0.00 | A | N |
| ATOM | 1977 | CD2 | HSD A 365 | -3.777  | -46.292 | -59.265 | 1.00 | 0.00 | A | C |
| ATOM | 1978 | C   | HSD A 365 | -6.187  | -44.253 | -57.617 | 1.00 | 0.00 | A | C |
| ATOM | 1979 | O   | HSD A 365 | -5.935  | -44.264 | -56.412 | 1.00 | 0.00 | A | O |
| ATOM | 1980 | N   | LEU A 366 | -5.616  | -43.379 | -58.465 | 1.00 | 0.00 | A | N |
| ATOM | 1981 | CA  | LEU A 366 | -4.650  | -42.371 | -58.096 | 1.00 | 0.00 | A | C |
| ATOM | 1982 | CB  | LEU A 366 | -4.058  | -41.703 | -59.354 | 1.00 | 0.00 | A | C |
| ATOM | 1983 | CG  | LEU A 366 | -2.955  | -40.665 | -59.090 | 1.00 | 0.00 | A | C |
| ATOM | 1984 | CD1 | LEU A 366 | -1.700  | -41.320 | -58.493 | 1.00 | 0.00 | A | C |
| ATOM | 1985 | CD2 | LEU A 366 | -2.651  | -39.848 | -60.359 | 1.00 | 0.00 | A | C |
| ATOM | 1986 | C   | LEU A 366 | -5.226  | -41.271 | -57.232 | 1.00 | 0.00 | A | C |
| ATOM | 1987 | O   | LEU A 366 | -4.590  | -40.856 | -56.262 | 1.00 | 0.00 | A | O |
| ATOM | 1988 | N   | SER A 367 | -6.442  | -40.774 | -57.549 | 1.00 | 0.00 | A | N |
| ATOM | 1989 | CA  | SER A 367 | -6.939  | -39.573 | -56.916 | 1.00 | 0.00 | A | C |
| ATOM | 1990 | CB  | SER A 367 | -8.093  | -38.897 | -57.681 | 1.00 | 0.00 | A | C |
| ATOM | 1991 | OG  | SER A 367 | -9.248  | -39.723 | -57.683 | 1.00 | 0.00 | A | O |
| ATOM | 1992 | C   | SER A 367 | -7.396  | -39.769 | -55.510 | 1.00 | 0.00 | A | C |
| ATOM | 1993 | O   | SER A 367 | -8.010  | -40.772 | -55.150 | 1.00 | 0.00 | A | O |
| ATOM | 1994 | N   | ARG A 368 | -7.002  | -38.815 | -54.645 | 1.00 | 0.00 | A | N |

|      |      |     |           |         |         |         |      |      |   |   |
|------|------|-----|-----------|---------|---------|---------|------|------|---|---|
| ATOM | 1995 | CA  | ARG A 368 | -7.425  | -38.778 | -53.283 | 1.00 | 0.00 | A | C |
| ATOM | 1996 | CB  | ARG A 368 | -6.332  | -38.209 | -52.390 | 1.00 | 0.00 | A | C |
| ATOM | 1997 | CG  | ARG A 368 | -4.994  | -38.942 | -52.514 | 1.00 | 0.00 | A | C |
| ATOM | 1998 | CD  | ARG A 368 | -4.596  | -39.723 | -51.266 | 1.00 | 0.00 | A | C |
| ATOM | 1999 | NE  | ARG A 368 | -5.852  | -39.963 | -50.516 | 1.00 | 0.00 | A | N |
| ATOM | 2000 | CZ  | ARG A 368 | -6.204  | -39.055 | -49.567 | 1.00 | 0.00 | A | C |
| ATOM | 2001 | NH1 | ARG A 368 | -5.330  | -38.065 | -49.235 | 1.00 | 0.00 | A | N |
| ATOM | 2002 | NH2 | ARG A 368 | -7.427  | -39.095 | -48.974 | 1.00 | 0.00 | A | N |
| ATOM | 2003 | C   | ARG A 368 | -8.780  | -38.120 | -53.110 | 1.00 | 0.00 | A | C |
| ATOM | 2004 | O   | ARG A 368 | -9.544  | -38.520 | -52.243 | 1.00 | 0.00 | A | O |
| ATOM | 2005 | N   | LYS A 369 | -9.157  | -37.089 | -53.900 | 1.00 | 0.00 | A | N |
| ATOM | 2006 | CA  | LYS A 369 | -10.441 | -36.485 | -53.627 | 1.00 | 0.00 | A | C |
| ATOM | 2007 | CB  | LYS A 369 | -10.345 | -35.022 | -53.154 | 1.00 | 0.00 | A | C |
| ATOM | 2008 | CG  | LYS A 369 | -9.805  | -34.045 | -54.198 | 1.00 | 0.00 | A | C |
| ATOM | 2009 | CD  | LYS A 369 | -9.986  | -32.581 | -53.790 | 1.00 | 0.00 | A | C |
| ATOM | 2010 | CE  | LYS A 369 | -9.452  | -31.580 | -54.815 | 1.00 | 0.00 | A | C |
| ATOM | 2011 | NZ  | LYS A 369 | -9.566  | -30.203 | -54.284 | 1.00 | 0.00 | A | N |
| ATOM | 2012 | C   | LYS A 369 | -11.328 | -36.515 | -54.843 | 1.00 | 0.00 | A | C |
| ATOM | 2013 | O   | LYS A 369 | -10.896 | -36.240 | -55.965 | 1.00 | 0.00 | A | O |
| ATOM | 2014 | N   | PHE A 370 | -12.618 | -36.857 | -54.623 | 1.00 | 0.00 | A | N |
| ATOM | 2015 | CA  | PHE A 370 | -13.600 | -36.926 | -55.670 | 1.00 | 0.00 | A | C |
| ATOM | 2016 | CB  | PHE A 370 | -14.293 | -38.296 | -55.730 | 1.00 | 0.00 | A | C |
| ATOM | 2017 | CG  | PHE A 370 | -13.260 | -39.368 | -55.826 | 1.00 | 0.00 | A | C |
| ATOM | 2018 | CD1 | PHE A 370 | -12.491 | -39.678 | -54.730 | 1.00 | 0.00 | A | C |
| ATOM | 2019 | CE1 | PHE A 370 | -11.540 | -40.669 | -54.790 | 1.00 | 0.00 | A | C |
| ATOM | 2020 | CZ  | PHE A 370 | -11.354 | -41.368 | -55.958 | 1.00 | 0.00 | A | C |
| ATOM | 2021 | CD2 | PHE A 370 | -13.077 | -40.080 | -56.989 | 1.00 | 0.00 | A | C |
| ATOM | 2022 | CE2 | PHE A 370 | -12.126 | -41.071 | -57.056 | 1.00 | 0.00 | A | C |
| ATOM | 2023 | C   | PHE A 370 | -14.698 | -35.990 | -55.263 | 1.00 | 0.00 | A | C |
| ATOM | 2024 | O   | PHE A 370 | -15.199 | -36.089 | -54.149 | 1.00 | 0.00 | A | O |
| ATOM | 2025 | N   | THR A 371 | -15.120 | -35.052 | -56.129 | 1.00 | 0.00 | A | N |
| ATOM | 2026 | CA  | THR A 371 | -16.185 | -34.188 | -55.703 | 1.00 | 0.00 | A | C |
| ATOM | 2027 | CB  | THR A 371 | -15.701 | -32.808 | -55.362 | 1.00 | 0.00 | A | C |
| ATOM | 2028 | OG1 | THR A 371 | -15.267 | -32.122 | -56.528 | 1.00 | 0.00 | A | O |
| ATOM | 2029 | CG2 | THR A 371 | -14.503 | -32.963 | -54.415 | 1.00 | 0.00 | A | C |
| ATOM | 2030 | C   | THR A 371 | -17.133 | -34.038 | -56.853 | 1.00 | 0.00 | A | C |
| ATOM | 2031 | O   | THR A 371 | -16.704 | -33.709 | -57.957 | 1.00 | 0.00 | A | O |
| ATOM | 2032 | N   | GLU A 372 | -18.445 | -34.293 | -56.650 | 1.00 | 0.00 | A | N |

|      |      |     |     |   |     |         |         |         |      |      |   |   |
|------|------|-----|-----|---|-----|---------|---------|---------|------|------|---|---|
| ATOM | 2033 | CA  | GLU | A | 372 | -19.308 | -34.057 | -57.773 | 1.00 | 0.00 | A | C |
| ATOM | 2034 | CB  | GLU | A | 372 | -19.389 | -35.238 | -58.759 | 1.00 | 0.00 | A | C |
| ATOM | 2035 | CG  | GLU | A | 372 | -18.093 | -35.466 | -59.536 | 1.00 | 0.00 | A | C |
| ATOM | 2036 | CD  | GLU | A | 372 | -18.342 | -36.548 | -60.572 | 1.00 | 0.00 | A | C |
| ATOM | 2037 | OE1 | GLU | A | 372 | -19.535 | -36.807 | -60.880 | 1.00 | 0.00 | A | O |
| ATOM | 2038 | OE2 | GLU | A | 372 | -17.340 | -37.124 | -61.075 | 1.00 | 0.00 | A | O |
| ATOM | 2039 | C   | GLU | A | 372 | -20.712 | -33.753 | -57.330 | 1.00 | 0.00 | A | C |
| ATOM | 2040 | O   | GLU | A | 372 | -21.556 | -34.646 | -57.257 | 1.00 | 0.00 | A | O |
| ATOM | 2041 | N   | TRP | A | 373 | -20.997 | -32.468 | -57.034 | 1.00 | 0.00 | A | N |
| ATOM | 2042 | CA  | TRP | A | 373 | -22.325 | -32.010 | -56.732 | 1.00 | 0.00 | A | C |
| ATOM | 2043 | CB  | TRP | A | 373 | -22.762 | -32.227 | -55.268 | 1.00 | 0.00 | A | C |
| ATOM | 2044 | CG  | TRP | A | 373 | -23.167 | -33.633 | -54.880 | 1.00 | 0.00 | A | C |
| ATOM | 2045 | CD1 | TRP | A | 373 | -22.400 | -34.736 | -54.644 | 1.00 | 0.00 | A | C |
| ATOM | 2046 | NE1 | TRP | A | 373 | -23.198 | -35.793 | -54.270 | 1.00 | 0.00 | A | N |
| ATOM | 2047 | CE2 | TRP | A | 373 | -24.512 | -35.366 | -54.258 | 1.00 | 0.00 | A | C |
| ATOM | 2048 | CD2 | TRP | A | 373 | -24.526 | -34.024 | -54.635 | 1.00 | 0.00 | A | C |
| ATOM | 2049 | CE3 | TRP | A | 373 | -25.695 | -33.320 | -54.714 | 1.00 | 0.00 | A | C |
| ATOM | 2050 | CZ3 | TRP | A | 373 | -26.861 | -33.990 | -54.407 | 1.00 | 0.00 | A | C |
| ATOM | 2051 | CZ2 | TRP | A | 373 | -25.667 | -36.027 | -53.954 | 1.00 | 0.00 | A | C |
| ATOM | 2052 | CH2 | TRP | A | 373 | -26.846 | -35.318 | -54.035 | 1.00 | 0.00 | A | C |
| ATOM | 2053 | C   | TRP | A | 373 | -22.302 | -30.528 | -56.937 | 1.00 | 0.00 | A | C |
| ATOM | 2054 | O   | TRP | A | 373 | -21.680 | -29.804 | -56.165 | 1.00 | 0.00 | A | O |
| ATOM | 2055 | N   | ALA | A | 374 | -22.981 | -29.994 | -57.967 | 1.00 | 0.00 | A | N |
| ATOM | 2056 | CA  | ALA | A | 374 | -22.867 | -28.564 | -58.059 | 1.00 | 0.00 | A | C |
| ATOM | 2057 | CB  | ALA | A | 374 | -21.760 | -28.093 | -59.021 | 1.00 | 0.00 | A | C |
| ATOM | 2058 | C   | ALA | A | 374 | -24.144 | -27.970 | -58.551 | 1.00 | 0.00 | A | C |
| ATOM | 2059 | O   | ALA | A | 374 | -24.748 | -28.461 | -59.504 | 1.00 | 0.00 | A | O |
| ATOM | 2060 | N   | TYR | A | 375 | -24.601 | -26.890 | -57.881 | 1.00 | 0.00 | A | N |
| ATOM | 2061 | CA  | TYR | A | 375 | -25.768 | -26.194 | -58.338 | 1.00 | 0.00 | A | C |
| ATOM | 2062 | CB  | TYR | A | 375 | -26.976 | -26.315 | -57.396 | 1.00 | 0.00 | A | C |
| ATOM | 2063 | CG  | TYR | A | 375 | -28.188 | -25.998 | -58.206 | 1.00 | 0.00 | A | C |
| ATOM | 2064 | CD1 | TYR | A | 375 | -28.708 | -26.913 | -59.092 | 1.00 | 0.00 | A | C |
| ATOM | 2065 | CE1 | TYR | A | 375 | -29.825 | -26.612 | -59.836 | 1.00 | 0.00 | A | C |
| ATOM | 2066 | CZ  | TYR | A | 375 | -30.435 | -25.389 | -59.695 | 1.00 | 0.00 | A | C |
| ATOM | 2067 | OH  | TYR | A | 375 | -31.582 | -25.074 | -60.457 | 1.00 | 0.00 | A | O |
| ATOM | 2068 | CD2 | TYR | A | 375 | -28.810 | -24.778 | -58.070 | 1.00 | 0.00 | A | C |
| ATOM | 2069 | CE2 | TYR | A | 375 | -29.926 | -24.472 | -58.811 | 1.00 | 0.00 | A | C |
| ATOM | 2070 | C   | TYR | A | 375 | -25.461 | -24.736 | -58.429 | 1.00 | 0.00 | A | C |

|      |      |     |           |         |         |         |      |      |   |   |
|------|------|-----|-----------|---------|---------|---------|------|------|---|---|
| ATOM | 2071 | O   | TYR A 375 | -25.476 | -24.040 | -57.416 | 1.00 | 0.00 | A | O |
| ATOM | 2072 | N   | GLY A 376 | -25.096 | -24.254 | -59.631 | 1.00 | 0.00 | A | N |
| ATOM | 2073 | CA  | GLY A 376 | -24.978 | -22.847 | -59.878 | 1.00 | 0.00 | A | C |
| ATOM | 2074 | C   | GLY A 376 | -23.861 | -22.300 | -59.052 | 1.00 | 0.00 | A | C |
| ATOM | 2075 | O   | GLY A 376 | -22.687 | -22.267 | -59.414 | 1.00 | 0.00 | A | O |
| ATOM | 2076 | N   | PRO A 377 | -24.340 | -21.788 | -57.952 | 1.00 | 0.00 | A | N |
| ATOM | 2077 | CD  | PRO A 377 | -25.682 | -21.235 | -57.965 | 1.00 | 0.00 | A | C |
| ATOM | 2078 | CA  | PRO A 377 | -23.531 | -21.205 | -56.911 | 1.00 | 0.00 | A | C |
| ATOM | 2079 | CB  | PRO A 377 | -24.404 | -20.151 | -56.234 | 1.00 | 0.00 | A | C |
| ATOM | 2080 | CG  | PRO A 377 | -25.841 | -20.549 | -56.603 | 1.00 | 0.00 | A | C |
| ATOM | 2081 | C   | PRO A 377 | -22.971 | -22.168 | -55.915 | 1.00 | 0.00 | A | C |
| ATOM | 2082 | O   | PRO A 377 | -22.111 | -21.753 | -55.139 | 1.00 | 0.00 | A | O |
| ATOM | 2083 | N   | VAL A 378 | -23.434 | -23.436 | -55.890 | 1.00 | 0.00 | A | N |
| ATOM | 2084 | CA  | VAL A 378 | -23.053 | -24.298 | -54.806 | 1.00 | 0.00 | A | C |
| ATOM | 2085 | CB  | VAL A 378 | -24.224 | -25.008 | -54.186 | 1.00 | 0.00 | A | C |
| ATOM | 2086 | CG1 | VAL A 378 | -24.841 | -25.952 | -55.227 | 1.00 | 0.00 | A | C |
| ATOM | 2087 | CG2 | VAL A 378 | -23.765 | -25.714 | -52.900 | 1.00 | 0.00 | A | C |
| ATOM | 2088 | C   | VAL A 378 | -22.063 | -25.317 | -55.272 | 1.00 | 0.00 | A | C |
| ATOM | 2089 | O   | VAL A 378 | -21.905 | -25.553 | -56.468 | 1.00 | 0.00 | A | O |
| ATOM | 2090 | N   | HSD A 379 | -21.331 | -25.920 | -54.314 | 1.00 | 0.00 | A | N |
| ATOM | 2091 | CA  | HSD A 379 | -20.325 | -26.875 | -54.674 | 1.00 | 0.00 | A | C |
| ATOM | 2092 | CB  | HSD A 379 | -18.954 | -26.205 | -54.860 | 1.00 | 0.00 | A | C |
| ATOM | 2093 | ND1 | HSD A 379 | -17.042 | -27.868 | -54.659 | 1.00 | 0.00 | A | N |
| ATOM | 2094 | CG  | HSD A 379 | -17.899 | -27.103 | -55.419 | 1.00 | 0.00 | A | C |
| ATOM | 2095 | CE1 | HSD A 379 | -16.229 | -28.523 | -55.525 | 1.00 | 0.00 | A | C |
| ATOM | 2096 | NE2 | HSD A 379 | -16.503 | -28.235 | -56.785 | 1.00 | 0.00 | A | N |
| ATOM | 2097 | CD2 | HSD A 379 | -17.557 | -27.340 | -56.716 | 1.00 | 0.00 | A | C |
| ATOM | 2098 | C   | HSD A 379 | -20.202 | -27.875 | -53.562 | 1.00 | 0.00 | A | C |
| ATOM | 2099 | O   | HSD A 379 | -20.506 | -27.578 | -52.409 | 1.00 | 0.00 | A | O |
| ATOM | 2100 | N   | SER A 380 | -19.768 | -29.108 | -53.896 | 1.00 | 0.00 | A | N |
| ATOM | 2101 | CA  | SER A 380 | -19.576 | -30.131 | -52.908 | 1.00 | 0.00 | A | C |
| ATOM | 2102 | CB  | SER A 380 | -20.609 | -31.267 | -52.974 | 1.00 | 0.00 | A | C |
| ATOM | 2103 | OG  | SER A 380 | -20.334 | -32.233 | -51.969 | 1.00 | 0.00 | A | O |
| ATOM | 2104 | C   | SER A 380 | -18.246 | -30.754 | -53.182 | 1.00 | 0.00 | A | C |
| ATOM | 2105 | O   | SER A 380 | -17.845 | -30.897 | -54.334 | 1.00 | 0.00 | A | O |
| ATOM | 2106 | N   | SER A 381 | -17.513 | -31.138 | -52.121 | 1.00 | 0.00 | A | N |
| ATOM | 2107 | CA  | SER A 381 | -16.234 | -31.740 | -52.356 | 1.00 | 0.00 | A | C |
| ATOM | 2108 | CB  | SER A 381 | -15.070 | -30.800 | -51.981 | 1.00 | 0.00 | A | C |

|      |      |     |     |   |     |         |         |         |      |      |   |   |
|------|------|-----|-----|---|-----|---------|---------|---------|------|------|---|---|
| ATOM | 2109 | OG  | SER | A | 381 | -13.814 | -31.414 | -52.218 | 1.00 | 0.00 | A | O |
| ATOM | 2110 | C   | SER | A | 381 | -16.139 | -32.960 | -51.500 | 1.00 | 0.00 | A | C |
| ATOM | 2111 | O   | SER | A | 381 | -16.595 | -32.956 | -50.359 | 1.00 | 0.00 | A | O |
| ATOM | 2112 | N   | LEU | A | 382 | -15.575 | -34.058 | -52.042 | 1.00 | 0.00 | A | N |
| ATOM | 2113 | CA  | LEU | A | 382 | -15.385 | -35.214 | -51.218 | 1.00 | 0.00 | A | C |
| ATOM | 2114 | CB  | LEU | A | 382 | -16.147 | -36.495 | -51.624 | 1.00 | 0.00 | A | C |
| ATOM | 2115 | CG  | LEU | A | 382 | -17.672 | -36.417 | -51.422 | 1.00 | 0.00 | A | C |
| ATOM | 2116 | CD1 | LEU | A | 382 | -18.307 | -35.361 | -52.337 | 1.00 | 0.00 | A | C |
| ATOM | 2117 | CD2 | LEU | A | 382 | -18.321 | -37.802 | -51.559 | 1.00 | 0.00 | A | C |
| ATOM | 2118 | C   | LEU | A | 382 | -13.926 | -35.520 | -51.173 | 1.00 | 0.00 | A | C |
| ATOM | 2119 | O   | LEU | A | 382 | -13.197 | -35.319 | -52.146 | 1.00 | 0.00 | A | O |
| ATOM | 2120 | N   | TYR | A | 383 | -13.468 | -36.007 | -50.002 | 1.00 | 0.00 | A | N |
| ATOM | 2121 | CA  | TYR | A | 383 | -12.077 | -36.301 | -49.802 | 1.00 | 0.00 | A | C |
| ATOM | 2122 | CB  | TYR | A | 383 | -11.464 | -35.439 | -48.699 | 1.00 | 0.00 | A | C |
| ATOM | 2123 | CG  | TYR | A | 383 | -11.544 | -34.044 | -49.225 | 1.00 | 0.00 | A | C |
| ATOM | 2124 | CD1 | TYR | A | 383 | -12.742 | -33.368 | -49.211 | 1.00 | 0.00 | A | C |
| ATOM | 2125 | CE1 | TYR | A | 383 | -12.833 | -32.088 | -49.704 | 1.00 | 0.00 | A | C |
| ATOM | 2126 | CZ  | TYR | A | 383 | -11.725 | -31.464 | -50.224 | 1.00 | 0.00 | A | C |
| ATOM | 2127 | OH  | TYR | A | 383 | -11.822 | -30.148 | -50.724 | 1.00 | 0.00 | A | O |
| ATOM | 2128 | CD2 | TYR | A | 383 | -10.441 | -33.423 | -49.771 | 1.00 | 0.00 | A | C |
| ATOM | 2129 | CE2 | TYR | A | 383 | -10.528 | -32.138 | -50.262 | 1.00 | 0.00 | A | C |
| ATOM | 2130 | C   | TYR | A | 383 | -11.975 | -37.759 | -49.470 | 1.00 | 0.00 | A | C |
| ATOM | 2131 | O   | TYR | A | 383 | -12.837 | -38.313 | -48.793 | 1.00 | 0.00 | A | O |
| ATOM | 2132 | N   | ASP | A | 384 | -10.912 | -38.431 | -49.962 | 1.00 | 0.00 | A | N |
| ATOM | 2133 | CA  | ASP | A | 384 | -10.845 | -39.863 | -49.841 | 1.00 | 0.00 | A | C |
| ATOM | 2134 | CB  | ASP | A | 384 | -9.527  | -40.464 | -50.354 | 1.00 | 0.00 | A | C |
| ATOM | 2135 | CG  | ASP | A | 384 | -9.673  | -41.962 | -50.537 | 1.00 | 0.00 | A | C |
| ATOM | 2136 | OD1 | ASP | A | 384 | -10.828 | -42.464 | -50.516 | 1.00 | 0.00 | A | O |
| ATOM | 2137 | OD2 | ASP | A | 384 | -8.615  | -42.622 | -50.716 | 1.00 | 0.00 | A | O |
| ATOM | 2138 | C   | ASP | A | 384 | -10.866 | -40.188 | -48.420 | 1.00 | 0.00 | A | C |
| ATOM | 2139 | O   | ASP | A | 384 | -11.747 | -40.884 | -47.919 | 1.00 | 0.00 | A | O |
| ATOM | 2140 | N   | LEU | A | 385 | -9.847  | -39.590 | -47.808 | 1.00 | 0.00 | A | N |
| ATOM | 2141 | CA  | LEU | A | 385 | -9.399  | -39.461 | -46.495 | 1.00 | 0.00 | A | C |
| ATOM | 2142 | CB  | LEU | A | 385 | -10.546 | -39.348 | -45.480 | 1.00 | 0.00 | A | C |
| ATOM | 2143 | CG  | LEU | A | 385 | -10.141 | -38.586 | -44.210 | 1.00 | 0.00 | A | C |
| ATOM | 2144 | CD1 | LEU | A | 385 | -11.103 | -38.873 | -43.052 | 1.00 | 0.00 | A | C |
| ATOM | 2145 | CD2 | LEU | A | 385 | -8.658  | -38.728 | -43.881 | 1.00 | 0.00 | A | C |
| ATOM | 2146 | C   | LEU | A | 385 | -8.498  | -40.604 | -46.139 | 1.00 | 0.00 | A | C |

|      |      |     |           |        |         |         |      |      |   |   |
|------|------|-----|-----------|--------|---------|---------|------|------|---|---|
| ATOM | 2147 | O   | LEU A 385 | -8.876 | -41.490 | -45.372 | 1.00 | 0.00 | A | O |
| ATOM | 2148 | N   | SER A 386 | -7.269 | -40.597 | -46.693 | 1.00 | 0.00 | A | N |
| ATOM | 2149 | CA  | SER A 386 | -6.256 | -41.562 | -46.370 | 1.00 | 0.00 | A | C |
| ATOM | 2150 | CB  | SER A 386 | -5.115 | -41.597 | -47.405 | 1.00 | 0.00 | A | C |
| ATOM | 2151 | OG  | SER A 386 | -4.392 | -40.376 | -47.390 | 1.00 | 0.00 | A | O |
| ATOM | 2152 | C   | SER A 386 | -5.642 | -41.209 | -45.044 | 1.00 | 0.00 | A | C |
| ATOM | 2153 | O   | SER A 386 | -5.270 | -42.084 | -44.266 | 1.00 | 0.00 | A | O |
| ATOM | 2154 | N   | CYS A 387 | -5.577 | -39.901 | -44.741 | 1.00 | 0.00 | A | N |
| ATOM | 2155 | CA  | CYS A 387 | -4.903 | -39.341 | -43.597 | 1.00 | 0.00 | A | C |
| ATOM | 2156 | CB  | CYS A 387 | -5.261 | -37.859 | -43.454 | 1.00 | 0.00 | A | C |
| ATOM | 2157 | SG  | CYS A 387 | -5.090 | -36.966 | -45.023 | 1.00 | 0.00 | A | S |
| ATOM | 2158 | C   | CYS A 387 | -5.439 | -39.957 | -42.351 | 1.00 | 0.00 | A | C |
| ATOM | 2159 | O   | CYS A 387 | -4.694 | -40.362 | -41.462 | 1.00 | 0.00 | A | O |
| ATOM | 2160 | N   | ILE A 388 | -6.770 | -40.017 | -42.252 | 1.00 | 0.00 | A | N |
| ATOM | 2161 | CA  | ILE A 388 | -7.440 | -40.560 | -41.115 | 1.00 | 0.00 | A | C |
| ATOM | 2162 | CB  | ILE A 388 | -8.934 | -40.460 | -41.209 | 1.00 | 0.00 | A | C |
| ATOM | 2163 | CG2 | ILE A 388 | -9.389 | -41.213 | -42.472 | 1.00 | 0.00 | A | C |
| ATOM | 2164 | CG1 | ILE A 388 | -9.582 | -40.974 | -39.911 | 1.00 | 0.00 | A | C |
| ATOM | 2165 | CD  | ILE A 388 | -9.247 | -40.137 | -38.677 | 1.00 | 0.00 | A | C |
| ATOM | 2166 | C   | ILE A 388 | -7.084 | -42.005 | -41.034 | 1.00 | 0.00 | A | C |
| ATOM | 2167 | O   | ILE A 388 | -6.919 | -42.547 | -39.946 | 1.00 | 0.00 | A | O |
| ATOM | 2168 | N   | ASP A 389 | -6.975 | -42.661 | -42.202 | 1.00 | 0.00 | A | N |
| ATOM | 2169 | CA  | ASP A 389 | -6.732 | -44.068 | -42.273 | 1.00 | 0.00 | A | C |
| ATOM | 2170 | CB  | ASP A 389 | -6.766 | -44.604 | -43.714 | 1.00 | 0.00 | A | C |
| ATOM | 2171 | CG  | ASP A 389 | -8.204 | -44.547 | -44.215 | 1.00 | 0.00 | A | C |
| ATOM | 2172 | OD1 | ASP A 389 | -9.130 | -44.774 | -43.392 | 1.00 | 0.00 | A | O |
| ATOM | 2173 | OD2 | ASP A 389 | -8.393 | -44.272 | -45.430 | 1.00 | 0.00 | A | O |
| ATOM | 2174 | C   | ASP A 389 | -5.399 | -44.439 | -41.696 | 1.00 | 0.00 | A | C |
| ATOM | 2175 | O   | ASP A 389 | -5.309 | -45.425 | -40.970 | 1.00 | 0.00 | A | O |
| ATOM | 2176 | N   | THR A 390 | -4.320 | -43.675 | -41.968 | 1.00 | 0.00 | A | N |
| ATOM | 2177 | CA  | THR A 390 | -3.064 | -44.205 | -41.525 | 1.00 | 0.00 | A | C |
| ATOM | 2178 | CB  | THR A 390 | -1.874 | -43.544 | -42.155 | 1.00 | 0.00 | A | C |
| ATOM | 2179 | OG1 | THR A 390 | -2.047 | -43.493 | -43.564 | 1.00 | 0.00 | A | O |
| ATOM | 2180 | CG2 | THR A 390 | -0.651 | -44.438 | -41.878 | 1.00 | 0.00 | A | C |
| ATOM | 2181 | C   | THR A 390 | -2.996 | -44.147 | -40.024 | 1.00 | 0.00 | A | C |
| ATOM | 2182 | O   | THR A 390 | -3.113 | -43.074 | -39.438 | 1.00 | 0.00 | A | O |
| ATOM | 2183 | N   | CYS A 391 | -3.075 | -45.319 | -39.347 | 1.00 | 0.00 | A | N |
| ATOM | 2184 | CA  | CYS A 391 | -2.871 | -45.405 | -37.919 | 1.00 | 0.00 | A | C |

|      |      |     |     |   |     |        |         |         |      |      |   |   |
|------|------|-----|-----|---|-----|--------|---------|---------|------|------|---|---|
| ATOM | 2185 | CB  | CYS | A | 391 | -3.844 | -46.386 | -37.246 | 1.00 | 0.00 | A | C |
| ATOM | 2186 | SG  | CYS | A | 391 | -3.637 | -46.426 | -35.439 | 1.00 | 0.00 | A | S |
| ATOM | 2187 | C   | CYS | A | 391 | -1.489 | -45.772 | -37.433 | 1.00 | 0.00 | A | C |
| ATOM | 2188 | O   | CYS | A | 391 | -0.872 | -45.056 | -36.646 | 1.00 | 0.00 | A | O |
| ATOM | 2189 | N   | GLU | A | 392 | -0.961 | -46.918 | -37.931 | 1.00 | 0.00 | A | N |
| ATOM | 2190 | CA  | GLU | A | 392 | 0.218  | -47.548 | -37.385 | 1.00 | 0.00 | A | C |
| ATOM | 2191 | CB  | GLU | A | 392 | 0.542  | -48.865 | -38.112 | 1.00 | 0.00 | A | C |
| ATOM | 2192 | CG  | GLU | A | 392 | 1.669  | -49.680 | -37.484 | 1.00 | 0.00 | A | C |
| ATOM | 2193 | CD  | GLU | A | 392 | 1.837  | -50.932 | -38.332 | 1.00 | 0.00 | A | C |
| ATOM | 2194 | OE1 | GLU | A | 392 | 1.478  | -50.877 | -39.538 | 1.00 | 0.00 | A | O |
| ATOM | 2195 | OE2 | GLU | A | 392 | 2.324  | -51.962 | -37.789 | 1.00 | 0.00 | A | O |
| ATOM | 2196 | C   | GLU | A | 392 | 1.379  | -46.637 | -37.536 | 1.00 | 0.00 | A | C |
| ATOM | 2197 | O   | GLU | A | 392 | 2.154  | -46.416 | -36.605 | 1.00 | 0.00 | A | O |
| ATOM | 2198 | N   | LYS | A | 393 | 1.515  | -46.086 | -38.746 | 1.00 | 0.00 | A | N |
| ATOM | 2199 | CA  | LYS | A | 393 | 2.531  | -45.128 | -39.015 | 1.00 | 0.00 | A | C |
| ATOM | 2200 | CB  | LYS | A | 393 | 2.791  | -45.005 | -40.523 | 1.00 | 0.00 | A | C |
| ATOM | 2201 | CG  | LYS | A | 393 | 3.325  | -46.336 | -41.066 | 1.00 | 0.00 | A | C |
| ATOM | 2202 | CD  | LYS | A | 393 | 3.202  | -46.535 | -42.578 | 1.00 | 0.00 | A | C |
| ATOM | 2203 | CE  | LYS | A | 393 | 3.698  | -47.911 | -43.031 | 1.00 | 0.00 | A | C |
| ATOM | 2204 | NZ  | LYS | A | 393 | 3.411  | -48.118 | -44.467 | 1.00 | 0.00 | A | N |
| ATOM | 2205 | C   | LYS | A | 393 | 2.002  | -43.854 | -38.446 | 1.00 | 0.00 | A | C |
| ATOM | 2206 | O   | LYS | A | 393 | 0.814  | -43.765 | -38.140 | 1.00 | 0.00 | A | O |
| ATOM | 2207 | N   | ASN | A | 394 | 2.872  | -42.847 | -38.242 | 1.00 | 0.00 | A | N |
| ATOM | 2208 | CA  | ASN | A | 394 | 2.396  | -41.627 | -37.660 | 1.00 | 0.00 | A | C |
| ATOM | 2209 | CB  | ASN | A | 394 | 3.495  | -40.560 | -37.523 | 1.00 | 0.00 | A | C |
| ATOM | 2210 | CG  | ASN | A | 394 | 4.439  | -41.031 | -36.428 | 1.00 | 0.00 | A | C |
| ATOM | 2211 | OD1 | ASN | A | 394 | 5.599  | -41.342 | -36.680 | 1.00 | 0.00 | A | O |
| ATOM | 2212 | ND2 | ASN | A | 394 | 3.919  | -41.096 | -35.172 | 1.00 | 0.00 | A | N |
| ATOM | 2213 | C   | ASN | A | 394 | 1.335  | -41.096 | -38.561 | 1.00 | 0.00 | A | C |
| ATOM | 2214 | O   | ASN | A | 394 | 0.287  | -40.690 | -38.082 | 1.00 | 0.00 | A | O |
| ATOM | 2215 | N   | SER | A | 395 | 1.566  | -41.069 | -39.885 | 1.00 | 0.00 | A | N |
| ATOM | 2216 | CA  | SER | A | 395 | 0.530  | -40.712 | -40.823 | 1.00 | 0.00 | A | C |
| ATOM | 2217 | CB  | SER | A | 395 | -0.853 | -41.267 | -40.467 | 1.00 | 0.00 | A | C |
| ATOM | 2218 | OG  | SER | A | 395 | -0.653 | -42.537 | -39.869 | 1.00 | 0.00 | A | O |
| ATOM | 2219 | C   | SER | A | 395 | 0.434  | -39.224 | -40.941 | 1.00 | 0.00 | A | C |
| ATOM | 2220 | O   | SER | A | 395 | 1.034  | -38.483 | -40.165 | 1.00 | 0.00 | A | O |
| ATOM | 2221 | N   | VAL | A | 396 | -0.295 | -38.751 | -41.969 | 1.00 | 0.00 | A | N |
| ATOM | 2222 | CA  | VAL | A | 396 | -0.446 | -37.336 | -42.123 | 1.00 | 0.00 | A | C |

|      |      |               |        |         |         |      |      |   |   |
|------|------|---------------|--------|---------|---------|------|------|---|---|
| ATOM | 2223 | CB VAL A 396  | -0.964 | -36.930 | -43.471 | 1.00 | 0.00 | A | C |
| ATOM | 2224 | CG1 VAL A 396 | -2.365 | -37.505 | -43.660 | 1.00 | 0.00 | A | C |
| ATOM | 2225 | CG2 VAL A 396 | -0.874 | -35.400 | -43.592 | 1.00 | 0.00 | A | C |
| ATOM | 2226 | C VAL A 396   | -1.305 | -36.796 | -41.016 | 1.00 | 0.00 | A | C |
| ATOM | 2227 | O VAL A 396   | -1.017 | -35.740 | -40.458 | 1.00 | 0.00 | A | O |
| ATOM | 2228 | N LEU A 397   | -2.394 | -37.507 | -40.666 | 1.00 | 0.00 | A | N |
| ATOM | 2229 | CA LEU A 397  | -3.255 | -37.038 | -39.614 | 1.00 | 0.00 | A | C |
| ATOM | 2230 | CB LEU A 397  | -4.546 | -37.858 | -39.470 | 1.00 | 0.00 | A | C |
| ATOM | 2231 | CG LEU A 397  | -5.456 | -37.344 | -38.339 | 1.00 | 0.00 | A | C |
| ATOM | 2232 | CD1 LEU A 397 | -5.882 | -35.887 | -38.588 | 1.00 | 0.00 | A | C |
| ATOM | 2233 | CD2 LEU A 397 | -6.653 | -38.280 | -38.113 | 1.00 | 0.00 | A | C |
| ATOM | 2234 | C LEU A 397   | -2.544 | -37.082 | -38.296 | 1.00 | 0.00 | A | C |
| ATOM | 2235 | O LEU A 397   | -2.619 | -36.129 | -37.525 | 1.00 | 0.00 | A | O |
| ATOM | 2236 | N GLU A 398   | -1.828 | -38.180 | -37.969 | 1.00 | 0.00 | A | N |
| ATOM | 2237 | CA GLU A 398  | -1.237 | -38.130 | -36.664 | 1.00 | 0.00 | A | C |
| ATOM | 2238 | CB GLU A 398  | -0.790 | -39.430 | -35.977 | 1.00 | 0.00 | A | C |
| ATOM | 2239 | CG GLU A 398  | -1.940 | -40.345 | -35.548 | 1.00 | 0.00 | A | C |
| ATOM | 2240 | CD GLU A 398  | -2.381 | -41.160 | -36.753 | 1.00 | 0.00 | A | C |
| ATOM | 2241 | OE1 GLU A 398 | -1.636 | -42.102 | -37.136 | 1.00 | 0.00 | A | O |
| ATOM | 2242 | OE2 GLU A 398 | -3.469 | -40.853 | -37.309 | 1.00 | 0.00 | A | O |
| ATOM | 2243 | C GLU A 398   | -0.130 | -37.136 | -36.619 | 1.00 | 0.00 | A | C |
| ATOM | 2244 | O GLU A 398   | 0.089  | -36.521 | -35.579 | 1.00 | 0.00 | A | O |
| ATOM | 2245 | N VAL A 399   | 0.618  | -36.951 | -37.724 | 1.00 | 0.00 | A | N |
| ATOM | 2246 | CA VAL A 399  | 1.682  | -35.994 | -37.661 | 1.00 | 0.00 | A | C |
| ATOM | 2247 | CB VAL A 399  | 2.547  | -35.957 | -38.886 | 1.00 | 0.00 | A | C |
| ATOM | 2248 | CG1 VAL A 399 | 3.250  | -37.319 | -39.020 | 1.00 | 0.00 | A | C |
| ATOM | 2249 | CG2 VAL A 399 | 1.689  | -35.596 | -40.099 | 1.00 | 0.00 | A | C |
| ATOM | 2250 | C VAL A 399   | 1.086  | -34.639 | -37.420 | 1.00 | 0.00 | A | C |
| ATOM | 2251 | O VAL A 399   | 1.622  | -33.851 | -36.643 | 1.00 | 0.00 | A | O |
| ATOM | 2252 | N ILE A 400   | -0.055 | -34.330 | -38.062 | 1.00 | 0.00 | A | N |
| ATOM | 2253 | CA ILE A 400  | -0.620 | -33.029 | -37.849 | 1.00 | 0.00 | A | C |
| ATOM | 2254 | CB ILE A 400  | -1.812 | -32.699 | -38.696 | 1.00 | 0.00 | A | C |
| ATOM | 2255 | CG2 ILE A 400 | -3.022 | -33.520 | -38.232 | 1.00 | 0.00 | A | C |
| ATOM | 2256 | CG1 ILE A 400 | -2.061 | -31.189 | -38.616 | 1.00 | 0.00 | A | C |
| ATOM | 2257 | CD ILE A 400  | -3.139 | -30.713 | -39.575 | 1.00 | 0.00 | A | C |
| ATOM | 2258 | C ILE A 400   | -1.028 | -32.895 | -36.411 | 1.00 | 0.00 | A | C |
| ATOM | 2259 | O ILE A 400   | -0.858 | -31.836 | -35.808 | 1.00 | 0.00 | A | O |
| ATOM | 2260 | N ALA A 401   | -1.603 | -33.962 | -35.828 | 1.00 | 0.00 | A | N |



|      |      |     |     |   |     |        |         |         |      |      |   |   |
|------|------|-----|-----|---|-----|--------|---------|---------|------|------|---|---|
| ATOM | 2261 | CA  | ALA | A | 401 | -2.056 | -33.907 | -34.465 | 1.00 | 0.00 | A | C |
| ATOM | 2262 | CB  | ALA | A | 401 | -2.692 | -35.219 | -34.000 | 1.00 | 0.00 | A | C |
| ATOM | 2263 | C   | ALA | A | 401 | -0.900 | -33.692 | -33.530 | 1.00 | 0.00 | A | C |
| ATOM | 2264 | O   | ALA | A | 401 | -0.982 | -32.883 | -32.606 | 1.00 | 0.00 | A | O |
| ATOM | 2265 | N   | TYR | A | 402 | 0.180  | -34.466 | -33.735 | 1.00 | 0.00 | A | N |
| ATOM | 2266 | CA  | TYR | A | 402 | 1.376  | -34.525 | -32.935 | 1.00 | 0.00 | A | C |
| ATOM | 2267 | CB  | TYR | A | 402 | 2.166  | -35.804 | -33.298 | 1.00 | 0.00 | A | C |
| ATOM | 2268 | CG  | TYR | A | 402 | 3.431  | -35.986 | -32.523 | 1.00 | 0.00 | A | C |
| ATOM | 2269 | CD1 | TYR | A | 402 | 3.403  | -36.437 | -31.222 | 1.00 | 0.00 | A | C |
| ATOM | 2270 | CE1 | TYR | A | 402 | 4.572  | -36.624 | -30.518 | 1.00 | 0.00 | A | C |
| ATOM | 2271 | CZ  | TYR | A | 402 | 5.785  | -36.370 | -31.113 | 1.00 | 0.00 | A | C |
| ATOM | 2272 | OH  | TYR | A | 402 | 6.986  | -36.562 | -30.396 | 1.00 | 0.00 | A | O |
| ATOM | 2273 | CD2 | TYR | A | 402 | 4.650  | -35.749 | -33.112 | 1.00 | 0.00 | A | C |
| ATOM | 2274 | CE2 | TYR | A | 402 | 5.822  | -35.932 | -32.414 | 1.00 | 0.00 | A | C |
| ATOM | 2275 | C   | TYR | A | 402 | 2.282  | -33.326 | -33.081 | 1.00 | 0.00 | A | C |
| ATOM | 2276 | O   | TYR | A | 402 | 2.800  | -32.813 | -32.089 | 1.00 | 0.00 | A | O |
| ATOM | 2277 | N   | SER | A | 403 | 2.474  | -32.828 | -34.321 | 1.00 | 0.00 | A | N |
| ATOM | 2278 | CA  | SER | A | 403 | 3.514  | -31.871 | -34.621 | 1.00 | 0.00 | A | C |
| ATOM | 2279 | CB  | SER | A | 403 | 3.539  | -31.442 | -36.100 | 1.00 | 0.00 | A | C |
| ATOM | 2280 | OG  | SER | A | 403 | 3.843  | -32.560 | -36.922 | 1.00 | 0.00 | A | O |
| ATOM | 2281 | C   | SER | A | 403 | 3.449  | -30.615 | -33.804 | 1.00 | 0.00 | A | C |
| ATOM | 2282 | O   | SER | A | 403 | 2.386  | -30.034 | -33.601 | 1.00 | 0.00 | A | O |
| ATOM | 2283 | N   | SER | A | 404 | 4.636  | -30.161 | -33.330 | 1.00 | 0.00 | A | N |
| ATOM | 2284 | CA  | SER | A | 404 | 4.722  | -28.948 | -32.561 | 1.00 | 0.00 | A | C |
| ATOM | 2285 | CB  | SER | A | 404 | 4.589  | -29.150 | -31.039 | 1.00 | 0.00 | A | C |
| ATOM | 2286 | OG  | SER | A | 404 | 3.268  | -29.534 | -30.690 | 1.00 | 0.00 | A | O |
| ATOM | 2287 | C   | SER | A | 404 | 6.055  | -28.300 | -32.767 | 1.00 | 0.00 | A | C |
| ATOM | 2288 | O   | SER | A | 404 | 7.014  | -28.906 | -33.242 | 1.00 | 0.00 | A | O |
| ATOM | 2289 | N   | SER | A | 405 | 6.111  | -27.000 | -32.408 | 1.00 | 0.00 | A | N |
| ATOM | 2290 | CA  | SER | A | 405 | 7.308  | -26.209 | -32.370 | 1.00 | 0.00 | A | C |
| ATOM | 2291 | CB  | SER | A | 405 | 8.414  | -26.921 | -31.584 | 1.00 | 0.00 | A | C |
| ATOM | 2292 | OG  | SER | A | 405 | 7.921  | -27.281 | -30.306 | 1.00 | 0.00 | A | O |
| ATOM | 2293 | C   | SER | A | 405 | 7.851  | -25.943 | -33.739 | 1.00 | 0.00 | A | C |
| ATOM | 2294 | O   | SER | A | 405 | 8.890  | -25.296 | -33.869 | 1.00 | 0.00 | A | O |
| ATOM | 2295 | N   | GLU | A | 406 | 7.180  | -26.410 | -34.803 | 1.00 | 0.00 | A | N |
| ATOM | 2296 | CA  | GLU | A | 406 | 7.710  | -26.132 | -36.107 | 1.00 | 0.00 | A | C |
| ATOM | 2297 | CB  | GLU | A | 406 | 7.068  | -26.945 | -37.241 | 1.00 | 0.00 | A | C |
| ATOM | 2298 | CG  | GLU | A | 406 | 7.655  | -28.351 | -37.351 | 1.00 | 0.00 | A | C |

|      |      |     |     |   |     |        |         |         |      |      |   |   |
|------|------|-----|-----|---|-----|--------|---------|---------|------|------|---|---|
| ATOM | 2299 | CD  | GLU | A | 406 | 9.120  | -28.201 | -37.755 | 1.00 | 0.00 | A | C |
| ATOM | 2300 | OE1 | GLU | A | 406 | 9.551  | -27.043 | -38.001 | 1.00 | 0.00 | A | O |
| ATOM | 2301 | OE2 | GLU | A | 406 | 9.828  | -29.243 | -37.820 | 1.00 | 0.00 | A | O |
| ATOM | 2302 | C   | GLU | A | 406 | 7.560  | -24.680 | -36.420 | 1.00 | 0.00 | A | C |
| ATOM | 2303 | O   | GLU | A | 406 | 8.486  | -24.068 | -36.947 | 1.00 | 0.00 | A | O |
| ATOM | 2304 | N   | THR | A | 407 | 6.396  | -24.091 | -36.068 | 1.00 | 0.00 | A | N |
| ATOM | 2305 | CA  | THR | A | 407 | 6.002  | -22.725 | -36.329 | 1.00 | 0.00 | A | C |
| ATOM | 2306 | CB  | THR | A | 407 | 7.168  | -21.774 | -36.233 | 1.00 | 0.00 | A | C |
| ATOM | 2307 | OG1 | THR | A | 407 | 7.743  | -21.860 | -34.937 | 1.00 | 0.00 | A | O |
| ATOM | 2308 | CG2 | THR | A | 407 | 6.701  | -20.332 | -36.493 | 1.00 | 0.00 | A | C |
| ATOM | 2309 | C   | THR | A | 407 | 5.314  | -22.546 | -37.672 | 1.00 | 0.00 | A | C |
| ATOM | 2310 | O   | THR | A | 407 | 4.631  | -21.530 | -37.822 | 1.00 | 0.00 | A | O |
| ATOM | 2311 | N   | PRO | A | 408 | 5.412  | -23.399 | -38.666 | 1.00 | 0.00 | A | N |
| ATOM | 2312 | CD  | PRO | A | 408 | 6.749  | -23.734 | -39.133 | 1.00 | 0.00 | A | C |
| ATOM | 2313 | CA  | PRO | A | 408 | 4.538  | -23.252 | -39.813 | 1.00 | 0.00 | A | C |
| ATOM | 2314 | CB  | PRO | A | 408 | 5.273  | -23.824 | -41.022 | 1.00 | 0.00 | A | C |
| ATOM | 2315 | CG  | PRO | A | 408 | 6.746  | -23.656 | -40.662 | 1.00 | 0.00 | A | C |
| ATOM | 2316 | C   | PRO | A | 408 | 3.204  | -23.918 | -39.616 | 1.00 | 0.00 | A | C |
| ATOM | 2317 | O   | PRO | A | 408 | 2.430  | -23.967 | -40.571 | 1.00 | 0.00 | A | O |
| ATOM | 2318 | N   | ASN | A | 409 | 2.919  | -24.428 | -38.404 | 1.00 | 0.00 | A | N |
| ATOM | 2319 | CA  | ASN | A | 409 | 1.817  | -25.315 | -38.139 | 1.00 | 0.00 | A | C |
| ATOM | 2320 | CB  | ASN | A | 409 | 1.806  | -25.871 | -36.698 | 1.00 | 0.00 | A | C |
| ATOM | 2321 | CG  | ASN | A | 409 | 1.563  | -24.765 | -35.676 | 1.00 | 0.00 | A | C |
| ATOM | 2322 | OD1 | ASN | A | 409 | 0.575  | -24.032 | -35.718 | 1.00 | 0.00 | A | O |
| ATOM | 2323 | ND2 | ASN | A | 409 | 2.498  | -24.649 | -34.698 | 1.00 | 0.00 | A | N |
| ATOM | 2324 | C   | ASN | A | 409 | 0.446  | -24.782 | -38.428 | 1.00 | 0.00 | A | C |
| ATOM | 2325 | O   | ASN | A | 409 | -0.410 | -25.554 | -38.858 | 1.00 | 0.00 | A | O |
| ATOM | 2326 | N   | ARG | A | 410 | 0.198  | -23.473 | -38.244 | 1.00 | 0.00 | A | N |
| ATOM | 2327 | CA  | ARG | A | 410 | -1.125 | -22.917 | -38.332 | 1.00 | 0.00 | A | C |
| ATOM | 2328 | CB  | ARG | A | 410 | -1.044 | -21.387 | -38.217 | 1.00 | 0.00 | A | C |
| ATOM | 2329 | CG  | ARG | A | 410 | -0.288 | -20.996 | -36.941 | 1.00 | 0.00 | A | C |
| ATOM | 2330 | CD  | ARG | A | 410 | 0.255  | -19.565 | -36.903 | 1.00 | 0.00 | A | C |
| ATOM | 2331 | NE  | ARG | A | 410 | 1.134  | -19.465 | -35.700 | 1.00 | 0.00 | A | N |
| ATOM | 2332 | CZ  | ARG | A | 410 | 2.338  | -18.821 | -35.776 | 1.00 | 0.00 | A | C |
| ATOM | 2333 | NH1 | ARG | A | 410 | 2.733  | -18.245 | -36.946 | 1.00 | 0.00 | A | N |
| ATOM | 2334 | NH2 | ARG | A | 410 | 3.149  | -18.756 | -34.677 | 1.00 | 0.00 | A | N |
| ATOM | 2335 | C   | ARG | A | 410 | -1.721 | -23.315 | -39.654 | 1.00 | 0.00 | A | C |
| ATOM | 2336 | O   | ARG | A | 410 | -2.891 | -23.689 | -39.727 | 1.00 | 0.00 | A | O |

|      |      |     |           |        |         |         |      |      |   |   |
|------|------|-----|-----------|--------|---------|---------|------|------|---|---|
| ATOM | 2337 | N   | HSD A 411 | -0.914 | -23.292 | -40.728 | 1.00 | 0.00 | A | N |
| ATOM | 2338 | CA  | HSD A 411 | -1.381 | -23.664 | -42.036 | 1.00 | 0.00 | A | C |
| ATOM | 2339 | CB  | HSD A 411 | -0.356 | -23.372 | -43.146 | 1.00 | 0.00 | A | C |
| ATOM | 2340 | ND1 | HSD A 411 | 0.978  | -21.241 | -42.770 | 1.00 | 0.00 | A | N |
| ATOM | 2341 | CG  | HSD A 411 | -0.092 | -21.909 | -43.323 | 1.00 | 0.00 | A | C |
| ATOM | 2342 | CE1 | HSD A 411 | 0.867  | -19.942 | -43.144 | 1.00 | 0.00 | A | C |
| ATOM | 2343 | NE2 | HSD A 411 | -0.198 | -19.727 | -43.898 | 1.00 | 0.00 | A | N |
| ATOM | 2344 | CD2 | HSD A 411 | -0.801 | -20.968 | -44.008 | 1.00 | 0.00 | A | C |
| ATOM | 2345 | C   | HSD A 411 | -1.728 | -25.128 | -42.123 | 1.00 | 0.00 | A | C |
| ATOM | 2346 | O   | HSD A 411 | -2.732 | -25.492 | -42.733 | 1.00 | 0.00 | A | O |
| ATOM | 2347 | N   | ASP A 412 | -0.908 | -26.016 | -41.526 | 1.00 | 0.00 | A | N |
| ATOM | 2348 | CA  | ASP A 412 | -1.087 | -27.442 | -41.658 | 1.00 | 0.00 | A | C |
| ATOM | 2349 | CB  | ASP A 412 | 0.016  | -28.224 | -40.922 | 1.00 | 0.00 | A | C |
| ATOM | 2350 | CG  | ASP A 412 | 1.365  | -27.925 | -41.559 | 1.00 | 0.00 | A | C |
| ATOM | 2351 | OD1 | ASP A 412 | 1.484  | -28.087 | -42.804 | 1.00 | 0.00 | A | O |
| ATOM | 2352 | OD2 | ASP A 412 | 2.292  | -27.521 | -40.809 | 1.00 | 0.00 | A | O |
| ATOM | 2353 | C   | ASP A 412 | -2.390 | -27.870 | -41.040 | 1.00 | 0.00 | A | C |
| ATOM | 2354 | O   | ASP A 412 | -3.128 | -28.671 | -41.612 | 1.00 | 0.00 | A | O |
| ATOM | 2355 | N   | MET A 413 | -2.703 | -27.347 | -39.841 | 1.00 | 0.00 | A | N |
| ATOM | 2356 | CA  | MET A 413 | -3.897 | -27.726 | -39.139 | 1.00 | 0.00 | A | C |
| ATOM | 2357 | CB  | MET A 413 | -4.016 | -27.079 | -37.750 | 1.00 | 0.00 | A | C |
| ATOM | 2358 | CG  | MET A 413 | -5.286 | -27.494 | -37.006 | 1.00 | 0.00 | A | C |
| ATOM | 2359 | SD  | MET A 413 | -5.303 | -29.233 | -36.479 | 1.00 | 0.00 | A | S |
| ATOM | 2360 | CE  | MET A 413 | -5.956 | -29.888 | -38.040 | 1.00 | 0.00 | A | C |
| ATOM | 2361 | C   | MET A 413 | -5.089 | -27.286 | -39.931 | 1.00 | 0.00 | A | C |
| ATOM | 2362 | O   | MET A 413 | -6.092 | -27.991 | -40.015 | 1.00 | 0.00 | A | O |
| ATOM | 2363 | N   | LEU A 414 | -4.983 | -26.105 | -40.557 | 1.00 | 0.00 | A | N |
| ATOM | 2364 | CA  | LEU A 414 | -6.050 | -25.479 | -41.285 | 1.00 | 0.00 | A | C |
| ATOM | 2365 | CB  | LEU A 414 | -5.674 | -24.099 | -41.839 | 1.00 | 0.00 | A | C |
| ATOM | 2366 | CG  | LEU A 414 | -6.763 | -23.539 | -42.764 | 1.00 | 0.00 | A | C |
| ATOM | 2367 | CD1 | LEU A 414 | -8.104 | -23.402 | -42.029 | 1.00 | 0.00 | A | C |
| ATOM | 2368 | CD2 | LEU A 414 | -6.298 | -22.242 | -43.442 | 1.00 | 0.00 | A | C |
| ATOM | 2369 | C   | LEU A 414 | -6.472 | -26.301 | -42.461 | 1.00 | 0.00 | A | C |
| ATOM | 2370 | O   | LEU A 414 | -7.618 | -26.213 | -42.896 | 1.00 | 0.00 | A | O |
| ATOM | 2371 | N   | LEU A 415 | -5.555 | -27.119 | -43.006 | 1.00 | 0.00 | A | N |
| ATOM | 2372 | CA  | LEU A 415 | -5.776 | -27.827 | -44.237 | 1.00 | 0.00 | A | C |
| ATOM | 2373 | CB  | LEU A 415 | -4.659 | -28.846 | -44.534 | 1.00 | 0.00 | A | C |
| ATOM | 2374 | CG  | LEU A 415 | -4.838 | -29.606 | -45.859 | 1.00 | 0.00 | A | C |

|      |      |     |     |   |     |         |         |         |      |      |   |   |
|------|------|-----|-----|---|-----|---------|---------|---------|------|------|---|---|
| ATOM | 2375 | CD1 | LEU | A | 415 | -4.808  | -28.638 | -47.052 | 1.00 | 0.00 | A | C |
| ATOM | 2376 | CD2 | LEU | A | 415 | -3.813  | -30.739 | -46.003 | 1.00 | 0.00 | A | C |
| ATOM | 2377 | C   | LEU | A | 415 | -7.095  | -28.544 | -44.231 | 1.00 | 0.00 | A | C |
| ATOM | 2378 | O   | LEU | A | 415 | -7.508  | -29.141 | -43.239 | 1.00 | 0.00 | A | O |
| ATOM | 2379 | N   | VAL | A | 416 | -7.804  | -28.472 | -45.379 | 1.00 | 0.00 | A | N |
| ATOM | 2380 | CA  | VAL | A | 416 | -9.107  | -29.051 | -45.527 | 1.00 | 0.00 | A | C |
| ATOM | 2381 | CB  | VAL | A | 416 | -10.190 | -28.005 | -45.566 | 1.00 | 0.00 | A | C |
| ATOM | 2382 | CG1 | VAL | A | 416 | -10.148 | -27.209 | -44.250 | 1.00 | 0.00 | A | C |
| ATOM | 2383 | CG2 | VAL | A | 416 | -10.001 | -27.135 | -46.820 | 1.00 | 0.00 | A | C |
| ATOM | 2384 | C   | VAL | A | 416 | -9.132  | -29.752 | -46.852 | 1.00 | 0.00 | A | C |
| ATOM | 2385 | O   | VAL | A | 416 | -8.182  | -29.662 | -47.627 | 1.00 | 0.00 | A | O |
| ATOM | 2386 | N   | GLU | A | 417 | -10.223 | -30.477 | -47.159 | 1.00 | 0.00 | A | N |
| ATOM | 2387 | CA  | GLU | A | 417 | -11.334 | -30.622 | -46.271 | 1.00 | 0.00 | A | C |
| ATOM | 2388 | CB  | GLU | A | 417 | -12.596 | -31.199 | -46.919 | 1.00 | 0.00 | A | C |
| ATOM | 2389 | CG  | GLU | A | 417 | -13.817 | -31.157 | -45.995 | 1.00 | 0.00 | A | C |
| ATOM | 2390 | CD  | GLU | A | 417 | -14.187 | -29.692 | -45.780 | 1.00 | 0.00 | A | C |
| ATOM | 2391 | OE1 | GLU | A | 417 | -13.432 | -28.995 | -45.053 | 1.00 | 0.00 | A | O |
| ATOM | 2392 | OE2 | GLU | A | 417 | -15.225 | -29.252 | -46.341 | 1.00 | 0.00 | A | O |
| ATOM | 2393 | C   | GLU | A | 417 | -11.013 | -31.516 | -45.126 | 1.00 | 0.00 | A | C |
| ATOM | 2394 | O   | GLU | A | 417 | -11.422 | -31.187 | -44.027 | 1.00 | 0.00 | A | O |
| ATOM | 2395 | N   | PRO | A | 418 | -10.306 | -32.603 | -45.256 | 1.00 | 0.00 | A | N |
| ATOM | 2396 | CD  | PRO | A | 418 | -10.172 | -33.303 | -46.524 | 1.00 | 0.00 | A | C |
| ATOM | 2397 | CA  | PRO | A | 418 | -10.225 | -33.513 | -44.145 | 1.00 | 0.00 | A | C |
| ATOM | 2398 | CB  | PRO | A | 418 | -9.539  | -34.766 | -44.680 | 1.00 | 0.00 | A | C |
| ATOM | 2399 | CG  | PRO | A | 418 | -9.950  | -34.783 | -46.160 | 1.00 | 0.00 | A | C |
| ATOM | 2400 | C   | PRO | A | 418 | -9.657  | -33.046 | -42.852 | 1.00 | 0.00 | A | C |
| ATOM | 2401 | O   | PRO | A | 418 | -10.198 | -33.433 | -41.826 | 1.00 | 0.00 | A | O |
| ATOM | 2402 | N   | LEU | A | 419 | -8.590  | -32.247 | -42.811 | 1.00 | 0.00 | A | N |
| ATOM | 2403 | CA  | LEU | A | 419 | -8.100  | -31.953 | -41.495 | 1.00 | 0.00 | A | C |
| ATOM | 2404 | CB  | LEU | A | 419 | -6.790  | -31.151 | -41.526 | 1.00 | 0.00 | A | C |
| ATOM | 2405 | CG  | LEU | A | 419 | -5.658  | -31.866 | -42.289 | 1.00 | 0.00 | A | C |
| ATOM | 2406 | CD1 | LEU | A | 419 | -4.352  | -31.061 | -42.235 | 1.00 | 0.00 | A | C |
| ATOM | 2407 | CD2 | LEU | A | 419 | -5.489  | -33.321 | -41.822 | 1.00 | 0.00 | A | C |
| ATOM | 2408 | C   | LEU | A | 419 | -9.139  | -31.157 | -40.761 | 1.00 | 0.00 | A | C |
| ATOM | 2409 | O   | LEU | A | 419 | -9.476  | -31.465 | -39.618 | 1.00 | 0.00 | A | O |
| ATOM | 2410 | N   | ASN | A | 420 | -9.691  | -30.118 | -41.407 | 1.00 | 0.00 | A | N |
| ATOM | 2411 | CA  | ASN | A | 420 | -10.708 | -29.322 | -40.773 | 1.00 | 0.00 | A | C |
| ATOM | 2412 | CB  | ASN | A | 420 | -11.046 | -28.049 | -41.570 | 1.00 | 0.00 | A | C |

|      |      |     |     |       |         |         |         |      |      |   |   |
|------|------|-----|-----|-------|---------|---------|---------|------|------|---|---|
| ATOM | 2413 | CG  | ASN | A 420 | -12.134 | -27.266 | -40.834 | 1.00 | 0.00 | A | C |
| ATOM | 2414 | OD1 | ASN | A 420 | -13.275 | -27.701 | -40.750 | 1.00 | 0.00 | A | O |
| ATOM | 2415 | ND2 | ASN | A 420 | -11.762 | -26.071 | -40.293 | 1.00 | 0.00 | A | N |
| ATOM | 2416 | C   | ASN | A 420 | -11.975 | -30.108 | -40.621 | 1.00 | 0.00 | A | C |
| ATOM | 2417 | O   | ASN | A 420 | -12.589 | -30.133 | -39.557 | 1.00 | 0.00 | A | O |
| ATOM | 2418 | N   | ARG | A 421 | -12.388 | -30.782 | -41.704 | 1.00 | 0.00 | A | N |
| ATOM | 2419 | CA  | ARG | A 421 | -13.619 | -31.507 | -41.824 | 1.00 | 0.00 | A | C |
| ATOM | 2420 | CB  | ARG | A 421 | -13.855 | -32.143 | -43.206 | 1.00 | 0.00 | A | C |
| ATOM | 2421 | CG  | ARG | A 421 | -15.169 | -32.931 | -43.241 | 1.00 | 0.00 | A | C |
| ATOM | 2422 | CD  | ARG | A 421 | -15.140 | -34.179 | -44.127 | 1.00 | 0.00 | A | C |
| ATOM | 2423 | NE  | ARG | A 421 | -15.159 | -33.748 | -45.550 | 1.00 | 0.00 | A | N |
| ATOM | 2424 | CZ  | ARG | A 421 | -15.354 | -34.687 | -46.524 | 1.00 | 0.00 | A | C |
| ATOM | 2425 | NH1 | ARG | A 421 | -15.488 | -36.001 | -46.180 | 1.00 | 0.00 | A | N |
| ATOM | 2426 | NH2 | ARG | A 421 | -15.415 | -34.312 | -47.835 | 1.00 | 0.00 | A | N |
| ATOM | 2427 | C   | ARG | A 421 | -13.651 | -32.655 | -40.872 | 1.00 | 0.00 | A | C |
| ATOM | 2428 | O   | ARG | A 421 | -14.652 | -32.887 | -40.201 | 1.00 | 0.00 | A | O |
| ATOM | 2429 | N   | LEU | A 422 | -12.541 | -33.401 | -40.788 | 1.00 | 0.00 | A | N |
| ATOM | 2430 | CA  | LEU | A 422 | -12.480 | -34.605 | -40.013 | 1.00 | 0.00 | A | C |
| ATOM | 2431 | CB  | LEU | A 422 | -11.137 | -35.366 | -40.151 | 1.00 | 0.00 | A | C |
| ATOM | 2432 | CG  | LEU | A 422 | -11.041 | -36.769 | -39.505 | 1.00 | 0.00 | A | C |
| ATOM | 2433 | CD1 | LEU | A 422 | -9.697  | -37.434 | -39.844 | 1.00 | 0.00 | A | C |
| ATOM | 2434 | CD2 | LEU | A 422 | -11.262 | -36.746 | -37.989 | 1.00 | 0.00 | A | C |
| ATOM | 2435 | C   | LEU | A 422 | -12.694 | -34.262 | -38.575 | 1.00 | 0.00 | A | C |
| ATOM | 2436 | O   | LEU | A 422 | -13.432 | -34.956 | -37.878 | 1.00 | 0.00 | A | O |
| ATOM | 2437 | N   | LEU | A 423 | -12.064 | -33.179 | -38.090 | 1.00 | 0.00 | A | N |
| ATOM | 2438 | CA  | LEU | A 423 | -12.189 | -32.854 | -36.698 | 1.00 | 0.00 | A | C |
| ATOM | 2439 | CB  | LEU | A 423 | -11.278 | -31.701 | -36.245 | 1.00 | 0.00 | A | C |
| ATOM | 2440 | CG  | LEU | A 423 | -9.816  | -32.136 | -36.017 | 1.00 | 0.00 | A | C |
| ATOM | 2441 | CD1 | LEU | A 423 | -9.699  | -33.026 | -34.771 | 1.00 | 0.00 | A | C |
| ATOM | 2442 | CD2 | LEU | A 423 | -9.219  | -32.819 | -37.254 | 1.00 | 0.00 | A | C |
| ATOM | 2443 | C   | LEU | A 423 | -13.606 | -32.522 | -36.344 | 1.00 | 0.00 | A | C |
| ATOM | 2444 | O   | LEU | A 423 | -14.091 | -32.909 | -35.282 | 1.00 | 0.00 | A | O |
| ATOM | 2445 | N   | GLN | A 424 | -14.315 | -31.801 | -37.227 | 1.00 | 0.00 | A | N |
| ATOM | 2446 | CA  | GLN | A 424 | -15.659 | -31.403 | -36.916 | 1.00 | 0.00 | A | C |
| ATOM | 2447 | CB  | GLN | A 424 | -16.279 | -30.554 | -38.041 | 1.00 | 0.00 | A | C |
| ATOM | 2448 | CG  | GLN | A 424 | -17.693 | -30.056 | -37.742 | 1.00 | 0.00 | A | C |
| ATOM | 2449 | CD  | GLN | A 424 | -17.582 | -29.019 | -36.638 | 1.00 | 0.00 | A | C |
| ATOM | 2450 | OE1 | GLN | A 424 | -16.642 | -29.045 | -35.846 | 1.00 | 0.00 | A | O |

|      |      |     |           |         |         |         |      |      |   |   |
|------|------|-----|-----------|---------|---------|---------|------|------|---|---|
| ATOM | 2451 | NE2 | GLN A 424 | -18.562 | -28.075 | -36.585 | 1.00 | 0.00 | A | N |
| ATOM | 2452 | C   | GLN A 424 | -16.495 | -32.631 | -36.752 | 1.00 | 0.00 | A | C |
| ATOM | 2453 | O   | GLN A 424 | -17.307 | -32.732 | -35.832 | 1.00 | 0.00 | A | O |
| ATOM | 2454 | N   | ASP A 425 | -16.291 | -33.613 | -37.643 | 1.00 | 0.00 | A | N |
| ATOM | 2455 | CA  | ASP A 425 | -17.078 | -34.808 | -37.629 | 1.00 | 0.00 | A | C |
| ATOM | 2456 | CB  | ASP A 425 | -16.717 | -35.731 | -38.806 | 1.00 | 0.00 | A | C |
| ATOM | 2457 | CG  | ASP A 425 | -17.863 | -36.702 | -39.047 | 1.00 | 0.00 | A | C |
| ATOM | 2458 | OD1 | ASP A 425 | -18.425 | -37.224 | -38.050 | 1.00 | 0.00 | A | O |
| ATOM | 2459 | OD2 | ASP A 425 | -18.186 | -36.934 | -40.243 | 1.00 | 0.00 | A | O |
| ATOM | 2460 | C   | ASP A 425 | -16.827 | -35.546 | -36.350 | 1.00 | 0.00 | A | C |
| ATOM | 2461 | O   | ASP A 425 | -17.761 | -36.043 | -35.721 | 1.00 | 0.00 | A | O |
| ATOM | 2462 | N   | LYS A 426 | -15.553 | -35.643 | -35.929 | 1.00 | 0.00 | A | N |
| ATOM | 2463 | CA  | LYS A 426 | -15.258 | -36.385 | -34.736 | 1.00 | 0.00 | A | C |
| ATOM | 2464 | CB  | LYS A 426 | -13.755 | -36.605 | -34.494 | 1.00 | 0.00 | A | C |
| ATOM | 2465 | CG  | LYS A 426 | -13.144 | -37.681 | -35.394 | 1.00 | 0.00 | A | C |
| ATOM | 2466 | CD  | LYS A 426 | -11.624 | -37.782 | -35.257 | 1.00 | 0.00 | A | C |
| ATOM | 2467 | CE  | LYS A 426 | -11.008 | -38.943 | -36.041 | 1.00 | 0.00 | A | C |
| ATOM | 2468 | NZ  | LYS A 426 | -9.541  | -38.764 | -36.128 | 1.00 | 0.00 | A | N |
| ATOM | 2469 | C   | LYS A 426 | -15.814 | -35.728 | -33.503 | 1.00 | 0.00 | A | C |
| ATOM | 2470 | O   | LYS A 426 | -16.397 | -36.398 | -32.652 | 1.00 | 0.00 | A | O |
| ATOM | 2471 | N   | TRP A 427 | -15.595 | -34.409 | -33.351 | 1.00 | 0.00 | A | N |
| ATOM | 2472 | CA  | TRP A 427 | -15.969 | -33.682 | -32.163 | 1.00 | 0.00 | A | C |
| ATOM | 2473 | CB  | TRP A 427 | -15.207 | -32.336 | -32.061 | 1.00 | 0.00 | A | C |
| ATOM | 2474 | CG  | TRP A 427 | -15.263 | -31.643 | -30.714 | 1.00 | 0.00 | A | C |
| ATOM | 2475 | CD1 | TRP A 427 | -14.692 | -32.059 | -29.553 | 1.00 | 0.00 | A | C |
| ATOM | 2476 | NE1 | TRP A 427 | -14.939 | -31.161 | -28.545 | 1.00 | 0.00 | A | N |
| ATOM | 2477 | CE2 | TRP A 427 | -15.667 | -30.118 | -29.063 | 1.00 | 0.00 | A | C |
| ATOM | 2478 | CD2 | TRP A 427 | -15.886 | -30.379 | -30.419 | 1.00 | 0.00 | A | C |
| ATOM | 2479 | CE3 | TRP A 427 | -16.575 | -29.504 | -31.204 | 1.00 | 0.00 | A | C |
| ATOM | 2480 | CZ3 | TRP A 427 | -17.054 | -28.359 | -30.604 | 1.00 | 0.00 | A | C |
| ATOM | 2481 | CZ2 | TRP A 427 | -16.138 | -28.979 | -28.473 | 1.00 | 0.00 | A | C |
| ATOM | 2482 | CH2 | TRP A 427 | -16.844 | -28.101 | -29.265 | 1.00 | 0.00 | A | C |
| ATOM | 2483 | C   | TRP A 427 | -17.433 | -33.406 | -32.068 | 1.00 | 0.00 | A | C |
| ATOM | 2484 | O   | TRP A 427 | -18.052 | -33.657 | -31.036 | 1.00 | 0.00 | A | O |
| ATOM | 2485 | N   | ASP A 428 | -18.028 | -32.904 | -33.165 | 1.00 | 0.00 | A | N |
| ATOM | 2486 | CA  | ASP A 428 | -19.380 | -32.445 | -33.114 | 1.00 | 0.00 | A | C |
| ATOM | 2487 | CB  | ASP A 428 | -19.887 | -31.973 | -34.489 | 1.00 | 0.00 | A | C |
| ATOM | 2488 | CG  | ASP A 428 | -21.278 | -31.364 | -34.350 | 1.00 | 0.00 | A | C |

|      |      |     |     |   |     |         |         |         |      |      |   |   |
|------|------|-----|-----|---|-----|---------|---------|---------|------|------|---|---|
| ATOM | 2489 | OD1 | ASP | A | 428 | -21.862 | -31.430 | -33.233 | 1.00 | 0.00 | A | O |
| ATOM | 2490 | OD2 | ASP | A | 428 | -21.774 | -30.814 | -35.369 | 1.00 | 0.00 | A | O |
| ATOM | 2491 | C   | ASP | A | 428 | -20.240 | -33.569 | -32.681 | 1.00 | 0.00 | A | C |
| ATOM | 2492 | O   | ASP | A | 428 | -21.073 | -33.403 | -31.792 | 1.00 | 0.00 | A | O |
| ATOM | 2493 | N   | ARG | A | 429 | -20.086 | -34.749 | -33.298 | 1.00 | 0.00 | A | N |
| ATOM | 2494 | CA  | ARG | A | 429 | -21.007 | -35.722 | -32.833 | 1.00 | 0.00 | A | C |
| ATOM | 2495 | CB  | ARG | A | 429 | -21.057 | -36.993 | -33.696 | 1.00 | 0.00 | A | C |
| ATOM | 2496 | CG  | ARG | A | 429 | -19.722 | -37.714 | -33.863 | 1.00 | 0.00 | A | C |
| ATOM | 2497 | CD  | ARG | A | 429 | -19.831 | -38.972 | -34.728 | 1.00 | 0.00 | A | C |
| ATOM | 2498 | NE  | ARG | A | 429 | -20.379 | -38.552 | -36.048 | 1.00 | 0.00 | A | N |
| ATOM | 2499 | CZ  | ARG | A | 429 | -21.078 | -39.440 | -36.814 | 1.00 | 0.00 | A | C |
| ATOM | 2500 | NH1 | ARG | A | 429 | -21.302 | -40.709 | -36.362 | 1.00 | 0.00 | A | N |
| ATOM | 2501 | NH2 | ARG | A | 429 | -21.558 | -39.053 | -38.033 | 1.00 | 0.00 | A | N |
| ATOM | 2502 | C   | ARG | A | 429 | -20.760 | -36.100 | -31.397 | 1.00 | 0.00 | A | C |
| ATOM | 2503 | O   | ARG | A | 429 | -21.616 | -35.852 | -30.552 | 1.00 | 0.00 | A | O |
| ATOM | 2504 | N   | PHE | A | 430 | -19.620 | -36.770 | -31.103 | 1.00 | 0.00 | A | N |
| ATOM | 2505 | CA  | PHE | A | 430 | -19.288 | -37.231 | -29.773 | 1.00 | 0.00 | A | C |
| ATOM | 2506 | CB  | PHE | A | 430 | -18.826 | -38.701 | -29.777 | 1.00 | 0.00 | A | C |
| ATOM | 2507 | CG  | PHE | A | 430 | -17.741 | -38.849 | -30.788 | 1.00 | 0.00 | A | C |
| ATOM | 2508 | CD1 | PHE | A | 430 | -16.442 | -38.536 | -30.482 | 1.00 | 0.00 | A | C |
| ATOM | 2509 | CE1 | PHE | A | 430 | -15.457 | -38.673 | -31.430 | 1.00 | 0.00 | A | C |
| ATOM | 2510 | CZ  | PHE | A | 430 | -15.753 | -39.126 | -32.692 | 1.00 | 0.00 | A | C |
| ATOM | 2511 | CD2 | PHE | A | 430 | -18.029 | -39.301 | -32.055 | 1.00 | 0.00 | A | C |
| ATOM | 2512 | CE2 | PHE | A | 430 | -17.051 | -39.439 | -33.010 | 1.00 | 0.00 | A | C |
| ATOM | 2513 | C   | PHE | A | 430 | -18.343 | -36.450 | -28.881 | 1.00 | 0.00 | A | C |
| ATOM | 2514 | O   | PHE | A | 430 | -18.581 | -36.337 | -27.678 | 1.00 | 0.00 | A | O |
| ATOM | 2515 | N   | VAL | A | 431 | -17.250 | -35.888 | -29.441 | 1.00 | 0.00 | A | N |
| ATOM | 2516 | CA  | VAL | A | 431 | -16.100 | -35.491 | -28.653 | 1.00 | 0.00 | A | C |
| ATOM | 2517 | CB  | VAL | A | 431 | -14.948 | -34.987 | -29.465 | 1.00 | 0.00 | A | C |
| ATOM | 2518 | CG1 | VAL | A | 431 | -13.803 | -34.647 | -28.491 | 1.00 | 0.00 | A | C |
| ATOM | 2519 | CG2 | VAL | A | 431 | -14.589 | -36.007 | -30.548 | 1.00 | 0.00 | A | C |
| ATOM | 2520 | C   | VAL | A | 431 | -16.364 | -34.428 | -27.639 | 1.00 | 0.00 | A | C |
| ATOM | 2521 | O   | VAL | A | 431 | -15.849 | -34.495 | -26.524 | 1.00 | 0.00 | A | O |
| ATOM | 2522 | N   | LYS | A | 432 | -17.154 | -33.404 | -27.984 | 1.00 | 0.00 | A | N |
| ATOM | 2523 | CA  | LYS | A | 432 | -17.337 | -32.313 | -27.080 | 1.00 | 0.00 | A | C |
| ATOM | 2524 | CB  | LYS | A | 432 | -18.303 | -31.254 | -27.632 | 1.00 | 0.00 | A | C |
| ATOM | 2525 | CG  | LYS | A | 432 | -19.692 | -31.812 | -27.942 | 1.00 | 0.00 | A | C |
| ATOM | 2526 | CD  | LYS | A | 432 | -20.731 | -30.738 | -28.273 | 1.00 | 0.00 | A | C |

|      |      |     |     |   |     |         |         |         |      |      |   |   |
|------|------|-----|-----|---|-----|---------|---------|---------|------|------|---|---|
| ATOM | 2527 | CE  | LYS | A | 432 | -22.089 | -31.310 | -28.684 | 1.00 | 0.00 | A | C |
| ATOM | 2528 | NZ  | LYS | A | 432 | -23.016 | -30.208 | -29.020 | 1.00 | 0.00 | A | N |
| ATOM | 2529 | C   | LYS | A | 432 | -17.899 | -32.831 | -25.800 | 1.00 | 0.00 | A | C |
| ATOM | 2530 | O   | LYS | A | 432 | -17.503 | -32.397 | -24.719 | 1.00 | 0.00 | A | O |
| ATOM | 2531 | N   | ARG | A | 433 | -18.828 | -33.794 | -25.886 | 1.00 | 0.00 | A | N |
| ATOM | 2532 | CA  | ARG | A | 433 | -19.470 | -34.313 | -24.717 | 1.00 | 0.00 | A | C |
| ATOM | 2533 | CB  | ARG | A | 433 | -20.588 | -35.311 | -25.055 | 1.00 | 0.00 | A | C |
| ATOM | 2534 | CG  | ARG | A | 433 | -21.453 | -35.679 | -23.848 | 1.00 | 0.00 | A | C |
| ATOM | 2535 | CD  | ARG | A | 433 | -22.813 | -36.263 | -24.233 | 1.00 | 0.00 | A | C |
| ATOM | 2536 | NE  | ARG | A | 433 | -23.510 | -35.229 | -25.052 | 1.00 | 0.00 | A | N |
| ATOM | 2537 | CZ  | ARG | A | 433 | -24.219 | -34.235 | -24.441 | 1.00 | 0.00 | A | C |
| ATOM | 2538 | NH1 | ARG | A | 433 | -24.350 | -34.222 | -23.084 | 1.00 | 0.00 | A | N |
| ATOM | 2539 | NH2 | ARG | A | 433 | -24.786 | -33.247 | -25.194 | 1.00 | 0.00 | A | N |
| ATOM | 2540 | C   | ARG | A | 433 | -18.475 | -34.994 | -23.824 | 1.00 | 0.00 | A | C |
| ATOM | 2541 | O   | ARG | A | 433 | -18.543 | -34.850 | -22.604 | 1.00 | 0.00 | A | O |
| ATOM | 2542 | N   | ILE | A | 434 | -17.515 | -35.747 | -24.404 | 1.00 | 0.00 | A | N |
| ATOM | 2543 | CA  | ILE | A | 434 | -16.587 | -36.525 | -23.623 | 1.00 | 0.00 | A | C |
| ATOM | 2544 | CB  | ILE | A | 434 | -15.679 | -37.403 | -24.441 | 1.00 | 0.00 | A | C |
| ATOM | 2545 | CG2 | ILE | A | 434 | -16.585 | -38.256 | -25.337 | 1.00 | 0.00 | A | C |
| ATOM | 2546 | CG1 | ILE | A | 434 | -14.656 | -36.599 | -25.255 | 1.00 | 0.00 | A | C |
| ATOM | 2547 | CD  | ILE | A | 434 | -13.552 | -37.462 | -25.866 | 1.00 | 0.00 | A | C |
| ATOM | 2548 | C   | ILE | A | 434 | -15.709 | -35.629 | -22.805 | 1.00 | 0.00 | A | C |
| ATOM | 2549 | O   | ILE | A | 434 | -15.415 | -35.920 | -21.648 | 1.00 | 0.00 | A | O |
| ATOM | 2550 | N   | PHE | A | 435 | -15.260 | -34.514 | -23.402 | 1.00 | 0.00 | A | N |
| ATOM | 2551 | CA  | PHE | A | 435 | -14.332 | -33.597 | -22.808 | 1.00 | 0.00 | A | C |
| ATOM | 2552 | CB  | PHE | A | 435 | -13.928 | -32.542 | -23.850 | 1.00 | 0.00 | A | C |
| ATOM | 2553 | CG  | PHE | A | 435 | -12.872 | -31.668 | -23.293 | 1.00 | 0.00 | A | C |
| ATOM | 2554 | CD1 | PHE | A | 435 | -11.685 | -32.197 | -22.837 | 1.00 | 0.00 | A | C |
| ATOM | 2555 | CE1 | PHE | A | 435 | -10.702 | -31.377 | -22.335 | 1.00 | 0.00 | A | C |
| ATOM | 2556 | CZ  | PHE | A | 435 | -10.901 | -30.019 | -22.311 | 1.00 | 0.00 | A | C |
| ATOM | 2557 | CD2 | PHE | A | 435 | -13.058 | -30.311 | -23.290 | 1.00 | 0.00 | A | C |
| ATOM | 2558 | CE2 | PHE | A | 435 | -12.078 | -29.495 | -22.795 | 1.00 | 0.00 | A | C |
| ATOM | 2559 | C   | PHE | A | 435 | -14.914 | -32.954 | -21.580 | 1.00 | 0.00 | A | C |
| ATOM | 2560 | O   | PHE | A | 435 | -14.234 | -32.832 | -20.560 | 1.00 | 0.00 | A | O |
| ATOM | 2561 | N   | TYR | A | 436 | -16.192 | -32.540 | -21.633 | 1.00 | 0.00 | A | N |
| ATOM | 2562 | CA  | TYR | A | 436 | -16.822 | -31.890 | -20.516 | 1.00 | 0.00 | A | C |
| ATOM | 2563 | CB  | TYR | A | 436 | -18.282 | -31.488 | -20.782 | 1.00 | 0.00 | A | C |
| ATOM | 2564 | CG  | TYR | A | 436 | -18.296 | -30.300 | -21.676 | 1.00 | 0.00 | A | C |



|      |      |               |         |         |         |      |      |   |   |
|------|------|---------------|---------|---------|---------|------|------|---|---|
| ATOM | 2565 | CD1 TYR A 436 | -18.178 | -29.039 | -21.134 | 1.00 | 0.00 | A | C |
| ATOM | 2566 | CE1 TYR A 436 | -18.195 | -27.925 | -21.934 | 1.00 | 0.00 | A | C |
| ATOM | 2567 | CZ TYR A 436  | -18.332 | -28.070 | -23.292 | 1.00 | 0.00 | A | C |
| ATOM | 2568 | OH TYR A 436  | -18.355 | -26.930 | -24.120 | 1.00 | 0.00 | A | O |
| ATOM | 2569 | CD2 TYR A 436 | -18.427 | -30.436 | -23.036 | 1.00 | 0.00 | A | C |
| ATOM | 2570 | CE2 TYR A 436 | -18.445 | -29.322 | -23.845 | 1.00 | 0.00 | A | C |
| ATOM | 2571 | C TYR A 436   | -16.839 | -32.820 | -19.346 | 1.00 | 0.00 | A | C |
| ATOM | 2572 | O TYR A 436   | -16.606 | -32.403 | -18.214 | 1.00 | 0.00 | A | O |
| ATOM | 2573 | N PHE A 437   | -17.119 | -34.112 | -19.593 | 1.00 | 0.00 | A | N |
| ATOM | 2574 | CA PHE A 437  | -17.179 | -35.057 | -18.518 | 1.00 | 0.00 | A | C |
| ATOM | 2575 | CB PHE A 437  | -17.508 | -36.489 | -18.986 | 1.00 | 0.00 | A | C |
| ATOM | 2576 | CG PHE A 437  | -17.479 | -37.390 | -17.797 | 1.00 | 0.00 | A | C |
| ATOM | 2577 | CD1 PHE A 437 | -18.576 | -37.511 | -16.974 | 1.00 | 0.00 | A | C |
| ATOM | 2578 | CE1 PHE A 437 | -18.543 | -38.341 | -15.878 | 1.00 | 0.00 | A | C |
| ATOM | 2579 | CZ PHE A 437  | -17.408 | -39.060 | -15.590 | 1.00 | 0.00 | A | C |
| ATOM | 2580 | CD2 PHE A 437 | -16.345 | -38.108 | -17.496 | 1.00 | 0.00 | A | C |
| ATOM | 2581 | CE2 PHE A 437 | -16.306 | -38.943 | -16.402 | 1.00 | 0.00 | A | C |
| ATOM | 2582 | C PHE A 437   | -15.842 | -35.078 | -17.857 | 1.00 | 0.00 | A | C |
| ATOM | 2583 | O PHE A 437   | -15.753 | -35.097 | -16.631 | 1.00 | 0.00 | A | O |
| ATOM | 2584 | N ASN A 438   | -14.762 | -35.056 | -18.656 | 1.00 | 0.00 | A | N |
| ATOM | 2585 | CA ASN A 438  | -13.446 | -35.108 | -18.090 | 1.00 | 0.00 | A | C |
| ATOM | 2586 | CB ASN A 438  | -12.339 | -35.037 | -19.159 | 1.00 | 0.00 | A | C |
| ATOM | 2587 | CG ASN A 438  | -12.450 | -36.257 | -20.059 | 1.00 | 0.00 | A | C |
| ATOM | 2588 | OD1 ASN A 438 | -13.046 | -37.266 | -19.685 | 1.00 | 0.00 | A | O |
| ATOM | 2589 | ND2 ASN A 438 | -11.860 | -36.168 | -21.282 | 1.00 | 0.00 | A | N |
| ATOM | 2590 | C ASN A 438   | -13.265 | -33.914 | -17.204 | 1.00 | 0.00 | A | C |
| ATOM | 2591 | O ASN A 438   | -12.780 | -34.034 | -16.080 | 1.00 | 0.00 | A | O |
| ATOM | 2592 | N PHE A 439   | -13.673 | -32.725 | -17.687 | 1.00 | 0.00 | A | N |
| ATOM | 2593 | CA PHE A 439  | -13.490 | -31.501 | -16.956 | 1.00 | 0.00 | A | C |
| ATOM | 2594 | CB PHE A 439  | -13.939 | -30.262 | -17.756 | 1.00 | 0.00 | A | C |
| ATOM | 2595 | CG PHE A 439  | -14.004 | -29.072 | -16.852 | 1.00 | 0.00 | A | C |
| ATOM | 2596 | CD1 PHE A 439 | -12.874 | -28.565 | -16.252 | 1.00 | 0.00 | A | C |
| ATOM | 2597 | CE1 PHE A 439 | -12.949 | -27.464 | -15.431 | 1.00 | 0.00 | A | C |
| ATOM | 2598 | CZ PHE A 439  | -14.155 | -26.847 | -15.209 | 1.00 | 0.00 | A | C |
| ATOM | 2599 | CD2 PHE A 439 | -15.205 | -28.437 | -16.635 | 1.00 | 0.00 | A | C |
| ATOM | 2600 | CE2 PHE A 439 | -15.286 | -27.335 | -15.816 | 1.00 | 0.00 | A | C |
| ATOM | 2601 | C PHE A 439   | -14.247 | -31.535 | -15.669 | 1.00 | 0.00 | A | C |
| ATOM | 2602 | O PHE A 439   | -13.710 | -31.189 | -14.618 | 1.00 | 0.00 | A | O |

ATOM 2603 N LEU A 440 -15.520 -31.968 -15.708 1.00 0.00 A N  
ATOM 2604 CA LEU A 440 -16.314 -31.953 -14.515 1.00 0.00 A C  
ATOM 2605 CB LEU A 440 -17.779 -32.363 -14.751 1.00 0.00 A C  
ATOM 2606 CG LEU A 440 -18.544 -31.373 -15.650 1.00 0.00 A C  
ATOM 2607 CD1 LEU A 440 -20.019 -31.777 -15.803 1.00 0.00 A C  
ATOM 2608 CD2 LEU A 440 -18.364 -29.927 -15.161 1.00 0.00 A C  
ATOM 2609 C LEU A 440 -15.727 -32.888 -13.507 1.00 0.00 A C  
ATOM 2610 O LEU A 440 -15.632 -32.550 -12.329 1.00 0.00 A O  
ATOM 2611 N VAL A 441 -15.287 -34.080 -13.949 1.00 0.00 A N  
ATOM 2612 CA VAL A 441 -14.770 -35.057 -13.031 1.00 0.00 A C  
ATOM 2613 CB VAL A 441 -14.342 -36.330 -13.694 1.00 0.00 A C  
ATOM 2614 CG1 VAL A 441 -13.692 -37.242 -12.640 1.00 0.00 A C  
ATOM 2615 CG2 VAL A 441 -15.573 -36.952 -14.362 1.00 0.00 A C  
ATOM 2616 C VAL A 441 -13.566 -34.493 -12.348 1.00 0.00 A C  
ATOM 2617 O VAL A 441 -13.368 -34.693 -11.152 1.00 0.00 A O  
ATOM 2618 N TYR A 442 -12.732 -33.763 -13.107 1.00 0.00 A N  
ATOM 2619 CA TYR A 442 -11.517 -33.192 -12.605 1.00 0.00 A C  
ATOM 2620 CB TYR A 442 -10.749 -32.458 -13.719 1.00 0.00 A C  
ATOM 2621 CG TYR A 442 -9.510 -31.852 -13.153 1.00 0.00 A C  
ATOM 2622 CD1 TYR A 442 -8.342 -32.576 -13.089 1.00 0.00 A C  
ATOM 2623 CE1 TYR A 442 -7.196 -32.019 -12.574 1.00 0.00 A C  
ATOM 2624 CZ TYR A 442 -7.215 -30.725 -12.114 1.00 0.00 A C  
ATOM 2625 OH TYR A 442 -6.043 -30.144 -11.582 1.00 0.00 A O  
ATOM 2626 CD2 TYR A 442 -9.519 -30.559 -12.684 1.00 0.00 A C  
ATOM 2627 CE2 TYR A 442 -8.378 -29.996 -12.166 1.00 0.00 A C  
ATOM 2628 C TYR A 442 -11.841 -32.208 -11.525 1.00 0.00 A C  
ATOM 2629 O TYR A 442 -11.164 -32.164 -10.497 1.00 0.00 A O  
ATOM 2630 N CYS A 443 -12.905 -31.410 -11.717 1.00 0.00 A N  
ATOM 2631 CA CYS A 443 -13.247 -30.367 -10.790 1.00 0.00 A C  
ATOM 2632 CB CYS A 443 -14.511 -29.602 -11.208 1.00 0.00 A C  
ATOM 2633 SG CYS A 443 -14.323 -28.838 -12.843 1.00 0.00 A S  
ATOM 2634 C CYS A 443 -13.519 -30.958 -9.439 1.00 0.00 A C  
ATOM 2635 O CYS A 443 -13.098 -30.411 -8.421 1.00 0.00 A O  
ATOM 2636 N LEU A 444 -14.219 -32.104 -9.400 1.00 0.00 A N  
ATOM 2637 CA LEU A 444 -14.588 -32.771 -8.181 1.00 0.00 A C  
ATOM 2638 CB LEU A 444 -15.422 -34.030 -8.498 1.00 0.00 A C  
ATOM 2639 CG LEU A 444 -15.819 -34.922 -7.307 1.00 0.00 A C  
ATOM 2640 CD1 LEU A 444 -14.621 -35.732 -6.790 1.00 0.00 A C

|      |      |     |     |   |     |         |         |        |      |      |   |   |
|------|------|-----|-----|---|-----|---------|---------|--------|------|------|---|---|
| ATOM | 2641 | CD2 | LEU | A | 444 | -16.524 | -34.117 | -6.208 | 1.00 | 0.00 | A | C |
| ATOM | 2642 | C   | LEU | A | 444 | -13.338 | -33.162 | -7.452 | 1.00 | 0.00 | A | C |
| ATOM | 2643 | O   | LEU | A | 444 | -13.247 | -33.072 | -6.229 | 1.00 | 0.00 | A | O |
| ATOM | 2644 | N   | TYR | A | 445 | -12.319 | -33.604 | -8.193 | 1.00 | 0.00 | A | N |
| ATOM | 2645 | CA  | TYR | A | 445 | -11.100 | -34.014 | -7.572 | 1.00 | 0.00 | A | C |
| ATOM | 2646 | CB  | TYR | A | 445 | -10.099 | -34.511 | -8.636 | 1.00 | 0.00 | A | C |
| ATOM | 2647 | CG  | TYR | A | 445 | -8.736  | -34.675 | -8.061 | 1.00 | 0.00 | A | C |
| ATOM | 2648 | CD1 | TYR | A | 445 | -8.383  | -35.821 | -7.388 | 1.00 | 0.00 | A | C |
| ATOM | 2649 | CE1 | TYR | A | 445 | -7.118  | -35.961 | -6.865 | 1.00 | 0.00 | A | C |
| ATOM | 2650 | CZ  | TYR | A | 445 | -6.193  | -34.954 | -7.010 | 1.00 | 0.00 | A | C |
| ATOM | 2651 | OH  | TYR | A | 445 | -4.895  | -35.099 | -6.477 | 1.00 | 0.00 | A | O |
| ATOM | 2652 | CD2 | TYR | A | 445 | -7.802  | -33.671 | -8.198 | 1.00 | 0.00 | A | C |
| ATOM | 2653 | CE2 | TYR | A | 445 | -6.537  | -33.807 | -7.678 | 1.00 | 0.00 | A | C |
| ATOM | 2654 | C   | TYR | A | 445 | -10.526 | -32.839 | -6.846 | 1.00 | 0.00 | A | C |
| ATOM | 2655 | O   | TYR | A | 445 | -10.031 | -32.962 | -5.726 | 1.00 | 0.00 | A | O |
| ATOM | 2656 | N   | MET | A | 446 | -10.591 | -31.657 | -7.478 | 1.00 | 0.00 | A | N |
| ATOM | 2657 | CA  | MET | A | 446 | -10.002 | -30.469 | -6.932 | 1.00 | 0.00 | A | C |
| ATOM | 2658 | CB  | MET | A | 446 | -10.085 | -29.291 | -7.910 | 1.00 | 0.00 | A | C |
| ATOM | 2659 | CG  | MET | A | 446 | -9.454  | -29.627 | -9.261 | 1.00 | 0.00 | A | C |
| ATOM | 2660 | SD  | MET | A | 446 | -7.836  | -30.438 | -9.127 | 1.00 | 0.00 | A | S |
| ATOM | 2661 | CE  | MET | A | 446 | -7.116  | -29.227 | -7.985 | 1.00 | 0.00 | A | C |
| ATOM | 2662 | C   | MET | A | 446 | -10.678 | -30.066 | -5.659 | 1.00 | 0.00 | A | C |
| ATOM | 2663 | O   | MET | A | 446 | -10.016 | -29.678 | -4.697 | 1.00 | 0.00 | A | O |
| ATOM | 2664 | N   | ILE | A | 447 | -12.018 | -30.146 | -5.612 | 1.00 | 0.00 | A | N |
| ATOM | 2665 | CA  | ILE | A | 447 | -12.738 | -29.701 | -4.460 | 1.00 | 0.00 | A | C |
| ATOM | 2666 | CB  | ILE | A | 447 | -14.224 | -29.735 | -4.667 | 1.00 | 0.00 | A | C |
| ATOM | 2667 | CG2 | ILE | A | 447 | -14.549 | -28.774 | -5.824 | 1.00 | 0.00 | A | C |
| ATOM | 2668 | CG1 | ILE | A | 447 | -14.692 | -31.171 | -4.915 | 1.00 | 0.00 | A | C |
| ATOM | 2669 | CD  | ILE | A | 447 | -16.190 | -31.322 | -5.143 | 1.00 | 0.00 | A | C |
| ATOM | 2670 | C   | ILE | A | 447 | -12.357 | -30.559 | -3.292 | 1.00 | 0.00 | A | C |
| ATOM | 2671 | O   | ILE | A | 447 | -12.194 | -30.065 | -2.176 | 1.00 | 0.00 | A | O |
| ATOM | 2672 | N   | ILE | A | 448 | -12.210 | -31.872 | -3.519 | 1.00 | 0.00 | A | N |
| ATOM | 2673 | CA  | ILE | A | 448 | -11.868 | -32.785 | -2.469 | 1.00 | 0.00 | A | C |
| ATOM | 2674 | CB  | ILE | A | 448 | -11.863 | -34.210 | -2.920 | 1.00 | 0.00 | A | C |
| ATOM | 2675 | CG2 | ILE | A | 448 | -11.377 | -35.085 | -1.753 | 1.00 | 0.00 | A | C |
| ATOM | 2676 | CG1 | ILE | A | 448 | -13.254 | -34.597 | -3.434 | 1.00 | 0.00 | A | C |
| ATOM | 2677 | CD  | ILE | A | 448 | -13.239 | -35.911 | -4.200 | 1.00 | 0.00 | A | C |
| ATOM | 2678 | C   | ILE | A | 448 | -10.486 | -32.511 | -1.949 | 1.00 | 0.00 | A | C |

|      |      |     |           |         |         |        |      |      |   |   |
|------|------|-----|-----------|---------|---------|--------|------|------|---|---|
| ATOM | 2679 | O   | ILE A 448 | -10.262 | -32.523 | -0.740 | 1.00 | 0.00 | A | O |
| ATOM | 2680 | N   | PHE A 449 | -9.518  | -32.258 | -2.849 | 1.00 | 0.00 | A | N |
| ATOM | 2681 | CA  | PHE A 449 | -8.150  | -32.090 | -2.431 | 1.00 | 0.00 | A | C |
| ATOM | 2682 | CB  | PHE A 449 | -7.206  | -31.816 | -3.618 | 1.00 | 0.00 | A | C |
| ATOM | 2683 | CG  | PHE A 449 | -5.784  | -31.886 | -3.158 | 1.00 | 0.00 | A | C |
| ATOM | 2684 | CD1 | PHE A 449 | -5.206  | -30.844 | -2.472 | 1.00 | 0.00 | A | C |
| ATOM | 2685 | CE1 | PHE A 449 | -3.894  | -30.913 | -2.061 | 1.00 | 0.00 | A | C |
| ATOM | 2686 | CZ  | PHE A 449 | -3.143  | -32.030 | -2.333 | 1.00 | 0.00 | A | C |
| ATOM | 2687 | CD2 | PHE A 449 | -5.020  | -33.000 | -3.431 | 1.00 | 0.00 | A | C |
| ATOM | 2688 | CE2 | PHE A 449 | -3.709  | -33.076 | -3.023 | 1.00 | 0.00 | A | C |
| ATOM | 2689 | C   | PHE A 449 | -8.074  | -30.911 | -1.512 | 1.00 | 0.00 | A | C |
| ATOM | 2690 | O   | PHE A 449 | -7.414  | -30.963 | -0.474 | 1.00 | 0.00 | A | O |
| ATOM | 2691 | N   | THR A 450 | -8.732  | -29.803 | -1.895 | 1.00 | 0.00 | A | N |
| ATOM | 2692 | CA  | THR A 450 | -8.736  | -28.599 | -1.117 | 1.00 | 0.00 | A | C |
| ATOM | 2693 | CB  | THR A 450 | -9.329  | -27.436 | -1.858 | 1.00 | 0.00 | A | C |
| ATOM | 2694 | OG1 | THR A 450 | -9.114  | -26.231 | -1.135 | 1.00 | 0.00 | A | O |
| ATOM | 2695 | CG2 | THR A 450 | -10.834 | -27.681 | -2.060 | 1.00 | 0.00 | A | C |
| ATOM | 2696 | C   | THR A 450 | -9.510  | -28.789 | 0.149  | 1.00 | 0.00 | A | C |
| ATOM | 2697 | O   | THR A 450 | -9.107  | -28.299 | 1.198  | 1.00 | 0.00 | A | O |
| ATOM | 2698 | N   | MET A 451 | -10.650 | -29.504 | 0.095  | 1.00 | 0.00 | A | N |
| ATOM | 2699 | CA  | MET A 451 | -11.472 | -29.627 | 1.267  | 1.00 | 0.00 | A | C |
| ATOM | 2700 | CB  | MET A 451 | -12.778 | -30.401 | 1.025  | 1.00 | 0.00 | A | C |
| ATOM | 2701 | CG  | MET A 451 | -13.809 | -29.611 | 0.221  | 1.00 | 0.00 | A | C |
| ATOM | 2702 | SD  | MET A 451 | -15.400 | -30.461 | 0.002  | 1.00 | 0.00 | A | S |
| ATOM | 2703 | CE  | MET A 451 | -16.252 | -29.007 | -0.675 | 1.00 | 0.00 | A | C |
| ATOM | 2704 | C   | MET A 451 | -10.737 | -30.332 | 2.360  | 1.00 | 0.00 | A | C |
| ATOM | 2705 | O   | MET A 451 | -10.761 | -29.896 | 3.509  | 1.00 | 0.00 | A | O |
| ATOM | 2706 | N   | ALA A 452 | -10.055 | -31.444 | 2.039  | 1.00 | 0.00 | A | N |
| ATOM | 2707 | CA  | ALA A 452 | -9.368  | -32.157 | 3.071  | 1.00 | 0.00 | A | C |
| ATOM | 2708 | CB  | ALA A 452 | -8.677  | -33.432 | 2.561  | 1.00 | 0.00 | A | C |
| ATOM | 2709 | C   | ALA A 452 | -8.302  | -31.264 | 3.612  | 1.00 | 0.00 | A | C |
| ATOM | 2710 | O   | ALA A 452 | -8.104  | -31.175 | 4.821  | 1.00 | 0.00 | A | O |
| ATOM | 2711 | N   | ALA A 453 | -7.596  | -30.556 | 2.713  | 1.00 | 0.00 | A | N |
| ATOM | 2712 | CA  | ALA A 453 | -6.509  | -29.707 | 3.108  | 1.00 | 0.00 | A | C |
| ATOM | 2713 | CB  | ALA A 453 | -5.804  | -29.056 | 1.904  | 1.00 | 0.00 | A | C |
| ATOM | 2714 | C   | ALA A 453 | -7.020  | -28.605 | 3.984  | 1.00 | 0.00 | A | C |
| ATOM | 2715 | O   | ALA A 453 | -6.414  | -28.283 | 5.003  | 1.00 | 0.00 | A | O |
| ATOM | 2716 | N   | TYR A 454 | -8.162  | -28.001 | 3.608  | 1.00 | 0.00 | A | N |

|      |      |     |     |   |     |         |         |        |      |      |   |   |
|------|------|-----|-----|---|-----|---------|---------|--------|------|------|---|---|
| ATOM | 2717 | CA  | TYR | A | 454 | -8.730  | -26.909 | 4.347  | 1.00 | 0.00 | A | C |
| ATOM | 2718 | CB  | TYR | A | 454 | -9.999  | -26.353 | 3.677  | 1.00 | 0.00 | A | C |
| ATOM | 2719 | CG  | TYR | A | 454 | -10.651 | -25.417 | 4.637  | 1.00 | 0.00 | A | C |
| ATOM | 2720 | CD1 | TYR | A | 454 | -10.261 | -24.099 | 4.718  | 1.00 | 0.00 | A | C |
| ATOM | 2721 | CE1 | TYR | A | 454 | -10.869 | -23.245 | 5.608  | 1.00 | 0.00 | A | C |
| ATOM | 2722 | CZ  | TYR | A | 454 | -11.875 | -23.705 | 6.425  | 1.00 | 0.00 | A | C |
| ATOM | 2723 | OH  | TYR | A | 454 | -12.495 | -22.823 | 7.336  | 1.00 | 0.00 | A | O |
| ATOM | 2724 | CD2 | TYR | A | 454 | -11.657 | -25.867 | 5.460  | 1.00 | 0.00 | A | C |
| ATOM | 2725 | CE2 | TYR | A | 454 | -12.268 | -25.020 | 6.352  | 1.00 | 0.00 | A | C |
| ATOM | 2726 | C   | TYR | A | 454 | -9.132  | -27.392 | 5.710  | 1.00 | 0.00 | A | C |
| ATOM | 2727 | O   | TYR | A | 454 | -8.846  | -26.756 | 6.722  | 1.00 | 0.00 | A | O |
| ATOM | 2728 | N   | TYR | A | 455 | -9.825  | -28.541 | 5.742  | 1.00 | 0.00 | A | N |
| ATOM | 2729 | CA  | TYR | A | 455 | -10.367 | -29.192 | 6.901  | 1.00 | 0.00 | A | C |
| ATOM | 2730 | CB  | TYR | A | 455 | -11.445 | -30.247 | 6.592  | 1.00 | 0.00 | A | C |
| ATOM | 2731 | CG  | TYR | A | 455 | -12.675 | -29.520 | 6.178  | 1.00 | 0.00 | A | C |
| ATOM | 2732 | CD1 | TYR | A | 455 | -13.395 | -28.796 | 7.102  | 1.00 | 0.00 | A | C |
| ATOM | 2733 | CE1 | TYR | A | 455 | -14.536 | -28.125 | 6.735  | 1.00 | 0.00 | A | C |
| ATOM | 2734 | CZ  | TYR | A | 455 | -14.975 | -28.178 | 5.434  | 1.00 | 0.00 | A | C |
| ATOM | 2735 | OH  | TYR | A | 455 | -16.146 | -27.492 | 5.050  | 1.00 | 0.00 | A | O |
| ATOM | 2736 | CD2 | TYR | A | 455 | -13.126 | -29.576 | 4.881  | 1.00 | 0.00 | A | C |
| ATOM | 2737 | CE2 | TYR | A | 455 | -14.267 | -28.908 | 4.507  | 1.00 | 0.00 | A | C |
| ATOM | 2738 | C   | TYR | A | 455 | -9.342  | -29.852 | 7.776  | 1.00 | 0.00 | A | C |
| ATOM | 2739 | O   | TYR | A | 455 | -9.650  | -30.137 | 8.930  | 1.00 | 0.00 | A | O |
| ATOM | 2740 | N   | ARG | A | 456 | -8.150  | -30.200 | 7.246  | 1.00 | 0.00 | A | N |
| ATOM | 2741 | CA  | ARG | A | 456 | -7.172  | -31.001 | 7.944  | 1.00 | 0.00 | A | C |
| ATOM | 2742 | CB  | ARG | A | 456 | -5.764  | -30.980 | 7.320  | 1.00 | 0.00 | A | C |
| ATOM | 2743 | CG  | ARG | A | 456 | -5.144  | -29.581 | 7.307  | 1.00 | 0.00 | A | C |
| ATOM | 2744 | CD  | ARG | A | 456 | -3.636  | -29.553 | 7.044  | 1.00 | 0.00 | A | C |
| ATOM | 2745 | NE  | ARG | A | 456 | -2.934  | -29.873 | 8.318  | 1.00 | 0.00 | A | N |
| ATOM | 2746 | CZ  | ARG | A | 456 | -1.749  | -30.554 | 8.292  | 1.00 | 0.00 | A | C |
| ATOM | 2747 | NH1 | ARG | A | 456 | -1.250  | -30.991 | 7.100  | 1.00 | 0.00 | A | N |
| ATOM | 2748 | NH2 | ARG | A | 456 | -1.070  | -30.796 | 9.451  | 1.00 | 0.00 | A | N |
| ATOM | 2749 | C   | ARG | A | 456 | -6.981  | -30.554 | 9.361  | 1.00 | 0.00 | A | C |
| ATOM | 2750 | O   | ARG | A | 456 | -6.945  | -29.365 | 9.676  | 1.00 | 0.00 | A | O |
| ATOM | 2751 | N   | PRO | A | 457 | -6.904  | -31.545 | 10.225 | 1.00 | 0.00 | A | N |
| ATOM | 2752 | CD  | PRO | A | 457 | -7.682  | -32.754 | 10.015 | 1.00 | 0.00 | A | C |
| ATOM | 2753 | CA  | PRO | A | 457 | -6.677  | -31.296 | 11.624 | 1.00 | 0.00 | A | C |
| ATOM | 2754 | CB  | PRO | A | 457 | -7.096  | -32.568 | 12.360 | 1.00 | 0.00 | A | C |

|      |      |     |           |        |         |        |      |      |   |   |
|------|------|-----|-----------|--------|---------|--------|------|------|---|---|
| ATOM | 2755 | CG  | PRO A 457 | -8.116 | -33.218 | 11.415 | 1.00 | 0.00 | A | C |
| ATOM | 2756 | C   | PRO A 457 | -5.258 | -30.913 | 11.901 | 1.00 | 0.00 | A | C |
| ATOM | 2757 | O   | PRO A 457 | -4.351 | -31.556 | 11.370 | 1.00 | 0.00 | A | O |
| ATOM | 2758 | N   | VAL A 458 | -5.053 | -29.891 | 12.755 | 1.00 | 0.00 | A | N |
| ATOM | 2759 | CA  | VAL A 458 | -3.746 | -29.415 | 13.112 | 1.00 | 0.00 | A | C |
| ATOM | 2760 | CB  | VAL A 458 | -3.805 | -28.158 | 13.926 | 1.00 | 0.00 | A | C |
| ATOM | 2761 | CG1 | VAL A 458 | -2.383 | -27.797 | 14.388 | 1.00 | 0.00 | A | C |
| ATOM | 2762 | CG2 | VAL A 458 | -4.483 | -27.070 | 13.075 | 1.00 | 0.00 | A | C |
| ATOM | 2763 | C   | VAL A 458 | -3.040 | -30.452 | 13.917 | 1.00 | 0.00 | A | C |
| ATOM | 2764 | O   | VAL A 458 | -1.871 | -30.741 | 13.654 | 1.00 | 0.00 | A | O |
| ATOM | 2765 | N   | ASP A 459 | -3.784 | -31.045 | 14.879 | 1.00 | 0.00 | A | N |
| ATOM | 2766 | CA  | ASP A 459 | -3.378 | -32.022 | 15.848 | 1.00 | 0.00 | A | C |
| ATOM | 2767 | CB  | ASP A 459 | -3.763 | -33.459 | 15.461 | 1.00 | 0.00 | A | C |
| ATOM | 2768 | CG  | ASP A 459 | -5.277 | -33.572 | 15.557 | 1.00 | 0.00 | A | C |
| ATOM | 2769 | OD1 | ASP A 459 | -5.843 | -33.086 | 16.570 | 1.00 | 0.00 | A | O |
| ATOM | 2770 | OD2 | ASP A 459 | -5.886 | -34.155 | 14.617 | 1.00 | 0.00 | A | O |
| ATOM | 2771 | C   | ASP A 459 | -1.919 | -31.978 | 16.069 | 1.00 | 0.00 | A | C |
| ATOM | 2772 | O   | ASP A 459 | -1.343 | -30.947 | 16.425 | 1.00 | 0.00 | A | O |
| ATOM | 2773 | N   | GLY A 460 | -1.337 | -33.170 | 15.905 | 1.00 | 0.00 | A | N |
| ATOM | 2774 | CA  | GLY A 460 | 0.051  | -33.435 | 15.920 | 1.00 | 0.00 | A | C |
| ATOM | 2775 | C   | GLY A 460 | 0.355  | -33.611 | 14.474 | 1.00 | 0.00 | A | C |
| ATOM | 2776 | O   | GLY A 460 | -0.014 | -32.768 | 13.656 | 1.00 | 0.00 | A | O |
| ATOM | 2777 | N   | LEU A 461 | 1.028  | -34.718 | 14.122 | 1.00 | 0.00 | A | N |
| ATOM | 2778 | CA  | LEU A 461 | 1.387  | -34.985 | 12.761 | 1.00 | 0.00 | A | C |
| ATOM | 2779 | CB  | LEU A 461 | 2.855  | -35.401 | 12.652 | 1.00 | 0.00 | A | C |
| ATOM | 2780 | CG  | LEU A 461 | 3.844  | -34.299 | 13.090 | 1.00 | 0.00 | A | C |
| ATOM | 2781 | CD1 | LEU A 461 | 3.705  | -33.961 | 14.584 | 1.00 | 0.00 | A | C |
| ATOM | 2782 | CD2 | LEU A 461 | 5.287  | -34.664 | 12.724 | 1.00 | 0.00 | A | C |
| ATOM | 2783 | C   | LEU A 461 | 0.505  | -36.101 | 12.294 | 1.00 | 0.00 | A | C |
| ATOM | 2784 | O   | LEU A 461 | 0.130  | -36.942 | 13.098 | 1.00 | 0.00 | A | O |
| ATOM | 2785 | N   | PRO A 462 | 0.281  | -36.236 | 11.018 | 1.00 | 0.00 | A | N |
| ATOM | 2786 | CD  | PRO A 462 | 1.414  | -36.202 | 10.105 | 1.00 | 0.00 | A | C |
| ATOM | 2787 | CA  | PRO A 462 | -0.816 | -37.012 | 10.479 | 1.00 | 0.00 | A | C |
| ATOM | 2788 | CB  | PRO A 462 | -0.436 | -37.320 | 9.033  | 1.00 | 0.00 | A | C |
| ATOM | 2789 | CG  | PRO A 462 | 1.099  | -37.252 | 9.031  | 1.00 | 0.00 | A | C |
| ATOM | 2790 | C   | PRO A 462 | -1.390 | -38.200 | 11.210 | 1.00 | 0.00 | A | C |
| ATOM | 2791 | O   | PRO A 462 | -2.535 | -37.999 | 11.625 | 1.00 | 0.00 | A | O |
| ATOM | 2792 | N   | PRO A 463 | -0.835 | -39.364 | 11.441 | 1.00 | 0.00 | A | N |

|      |      |     |     |   |     |         |         |        |      |      |   |   |
|------|------|-----|-----|---|-----|---------|---------|--------|------|------|---|---|
| ATOM | 2793 | CD  | PRO | A | 463 | 0.067   | -40.006 | 10.500 | 1.00 | 0.00 | A | C |
| ATOM | 2794 | CA  | PRO | A | 463 | -1.566  | -40.328 | 12.226 | 1.00 | 0.00 | A | C |
| ATOM | 2795 | CB  | PRO | A | 463 | -1.086  | -41.708 | 11.775 | 1.00 | 0.00 | A | C |
| ATOM | 2796 | CG  | PRO | A | 463 | 0.244   | -41.428 | 11.055 | 1.00 | 0.00 | A | C |
| ATOM | 2797 | C   | PRO | A | 463 | -1.264  | -40.039 | 13.651 | 1.00 | 0.00 | A | C |
| ATOM | 2798 | O   | PRO | A | 463 | -0.250  | -39.389 | 13.901 | 1.00 | 0.00 | A | O |
| ATOM | 2799 | N   | PHE | A | 464 | -2.093  | -40.521 | 14.596 | 1.00 | 0.00 | A | N |
| ATOM | 2800 | CA  | PHE | A | 464 | -3.242  | -41.297 | 14.255 | 1.00 | 0.00 | A | C |
| ATOM | 2801 | CB  | PHE | A | 464 | -3.605  | -42.378 | 15.288 | 1.00 | 0.00 | A | C |
| ATOM | 2802 | CG  | PHE | A | 464 | -2.619  | -43.480 | 15.094 | 1.00 | 0.00 | A | C |
| ATOM | 2803 | CD1 | PHE | A | 464 | -1.378  | -43.439 | 15.687 | 1.00 | 0.00 | A | C |
| ATOM | 2804 | CE1 | PHE | A | 464 | -0.476  | -44.459 | 15.494 | 1.00 | 0.00 | A | C |
| ATOM | 2805 | CZ  | PHE | A | 464 | -0.805  | -45.533 | 14.702 | 1.00 | 0.00 | A | C |
| ATOM | 2806 | CD2 | PHE | A | 464 | -2.939  | -44.558 | 14.299 | 1.00 | 0.00 | A | C |
| ATOM | 2807 | CE2 | PHE | A | 464 | -2.040  | -45.581 | 14.105 | 1.00 | 0.00 | A | C |
| ATOM | 2808 | C   | PHE | A | 464 | -4.416  | -40.397 | 14.045 | 1.00 | 0.00 | A | C |
| ATOM | 2809 | O   | PHE | A | 464 | -4.438  | -39.256 | 14.502 | 1.00 | 0.00 | A | O |
| ATOM | 2810 | N   | LYS | A | 465 | -5.410  | -40.904 | 13.289 | 1.00 | 0.00 | A | N |
| ATOM | 2811 | CA  | LYS | A | 465 | -6.607  | -40.170 | 13.002 | 1.00 | 0.00 | A | C |
| ATOM | 2812 | CB  | LYS | A | 465 | -6.970  | -40.176 | 11.507 | 1.00 | 0.00 | A | C |
| ATOM | 2813 | CG  | LYS | A | 465 | -5.909  | -39.540 | 10.608 | 1.00 | 0.00 | A | C |
| ATOM | 2814 | CD  | LYS | A | 465 | -6.101  | -39.861 | 9.125  | 1.00 | 0.00 | A | C |
| ATOM | 2815 | CE  | LYS | A | 465 | -5.883  | -41.336 | 8.784  | 1.00 | 0.00 | A | C |
| ATOM | 2816 | NZ  | LYS | A | 465 | -4.452  | -41.688 | 8.934  | 1.00 | 0.00 | A | N |
| ATOM | 2817 | C   | LYS | A | 465 | -7.738  | -40.869 | 13.705 | 1.00 | 0.00 | A | C |
| ATOM | 2818 | O   | LYS | A | 465 | -7.780  | -42.097 | 13.752 | 1.00 | 0.00 | A | O |
| ATOM | 2819 | N   | MET | A | 466 | -8.679  | -40.089 | 14.284 | 1.00 | 0.00 | A | N |
| ATOM | 2820 | CA  | MET | A | 466 | -9.801  | -40.610 | 15.020 | 1.00 | 0.00 | A | C |
| ATOM | 2821 | CB  | MET | A | 466 | -10.647 | -39.497 | 15.668 | 1.00 | 0.00 | A | C |
| ATOM | 2822 | CG  | MET | A | 466 | -9.882  | -38.572 | 16.623 | 1.00 | 0.00 | A | C |
| ATOM | 2823 | SD  | MET | A | 466 | -10.930 | -37.303 | 17.405 | 1.00 | 0.00 | A | S |
| ATOM | 2824 | CE  | MET | A | 466 | -9.625  | -36.098 | 17.788 | 1.00 | 0.00 | A | C |
| ATOM | 2825 | C   | MET | A | 466 | -10.724 | -41.357 | 14.102 | 1.00 | 0.00 | A | C |
| ATOM | 2826 | O   | MET | A | 466 | -11.183 | -42.451 | 14.427 | 1.00 | 0.00 | A | O |
| ATOM | 2827 | N   | GLU | A | 467 | -11.001 | -40.794 | 12.911 | 1.00 | 0.00 | A | N |
| ATOM | 2828 | CA  | GLU | A | 467 | -11.914 | -41.419 | 11.999 | 1.00 | 0.00 | A | C |
| ATOM | 2829 | CB  | GLU | A | 467 | -11.503 | -42.851 | 11.630 | 1.00 | 0.00 | A | C |
| ATOM | 2830 | CG  | GLU | A | 467 | -10.218 | -42.941 | 10.814 | 1.00 | 0.00 | A | C |

|      |      |     |           |         |         |        |      |      |   |   |
|------|------|-----|-----------|---------|---------|--------|------|------|---|---|
| ATOM | 2831 | CD  | GLU A 467 | -9.984  | -44.421 | 10.552 | 1.00 | 0.00 | A | C |
| ATOM | 2832 | OE1 | GLU A 467 | -10.942 | -45.207 | 10.783 | 1.00 | 0.00 | A | O |
| ATOM | 2833 | OE2 | GLU A 467 | -8.859  | -44.786 | 10.119 | 1.00 | 0.00 | A | O |
| ATOM | 2834 | C   | GLU A 467 | -13.270 | -41.521 | 12.640 | 1.00 | 0.00 | A | C |
| ATOM | 2835 | O   | GLU A 467 | -14.000 | -42.483 | 12.402 | 1.00 | 0.00 | A | O |
| ATOM | 2836 | N   | LYS A 468 | -13.661 | -40.521 | 13.457 | 1.00 | 0.00 | A | N |
| ATOM | 2837 | CA  | LYS A 468 | -14.957 | -40.523 | 14.081 | 1.00 | 0.00 | A | C |
| ATOM | 2838 | CB  | LYS A 468 | -14.961 | -39.977 | 15.520 | 1.00 | 0.00 | A | C |
| ATOM | 2839 | CG  | LYS A 468 | -14.362 | -40.970 | 16.519 | 1.00 | 0.00 | A | C |
| ATOM | 2840 | CD  | LYS A 468 | -15.099 | -42.313 | 16.523 | 1.00 | 0.00 | A | C |
| ATOM | 2841 | CE  | LYS A 468 | -14.501 | -43.365 | 17.461 | 1.00 | 0.00 | A | C |
| ATOM | 2842 | NZ  | LYS A 468 | -15.275 | -44.626 | 17.363 | 1.00 | 0.00 | A | N |
| ATOM | 2843 | C   | LYS A 468 | -15.875 | -39.683 | 13.243 | 1.00 | 0.00 | A | C |
| ATOM | 2844 | O   | LYS A 468 | -15.592 | -39.428 | 12.079 | 1.00 | 0.00 | A | O |
| ATOM | 2845 | N   | THR A 469 | -17.022 | -39.249 | 13.800 | 1.00 | 0.00 | A | N |
| ATOM | 2846 | CA  | THR A 469 | -17.951 | -38.490 | 13.007 | 1.00 | 0.00 | A | C |
| ATOM | 2847 | CB  | THR A 469 | -19.173 | -38.063 | 13.762 | 1.00 | 0.00 | A | C |
| ATOM | 2848 | OG1 | THR A 469 | -20.111 | -37.462 | 12.880 | 1.00 | 0.00 | A | O |
| ATOM | 2849 | CG2 | THR A 469 | -18.753 | -37.067 | 14.858 | 1.00 | 0.00 | A | C |
| ATOM | 2850 | C   | THR A 469 | -17.259 | -37.259 | 12.521 | 1.00 | 0.00 | A | C |
| ATOM | 2851 | O   | THR A 469 | -16.401 | -36.695 | 13.195 | 1.00 | 0.00 | A | O |
| ATOM | 2852 | N   | GLY A 470 | -17.535 | -36.857 | 11.263 | 1.00 | 0.00 | A | N |
| ATOM | 2853 | CA  | GLY A 470 | -16.944 | -35.672 | 10.705 | 1.00 | 0.00 | A | C |
| ATOM | 2854 | C   | GLY A 470 | -15.603 | -36.075 | 10.197 | 1.00 | 0.00 | A | C |
| ATOM | 2855 | O   | GLY A 470 | -15.110 | -35.558 | 9.195  | 1.00 | 0.00 | A | O |
| ATOM | 2856 | N   | ASP A 471 | -14.976 | -37.009 | 10.932 | 1.00 | 0.00 | A | N |
| ATOM | 2857 | CA  | ASP A 471 | -13.730 | -37.604 | 10.606 | 1.00 | 0.00 | A | C |
| ATOM | 2858 | CB  | ASP A 471 | -13.068 | -38.361 | 11.760 | 1.00 | 0.00 | A | C |
| ATOM | 2859 | CG  | ASP A 471 | -12.577 | -37.326 | 12.762 | 1.00 | 0.00 | A | C |
| ATOM | 2860 | OD1 | ASP A 471 | -12.647 | -36.109 | 12.438 | 1.00 | 0.00 | A | O |
| ATOM | 2861 | OD2 | ASP A 471 | -12.122 | -37.740 | 13.861 | 1.00 | 0.00 | A | O |
| ATOM | 2862 | C   | ASP A 471 | -13.972 | -38.544 | 9.483  | 1.00 | 0.00 | A | C |
| ATOM | 2863 | O   | ASP A 471 | -13.056 | -38.892 | 8.749  | 1.00 | 0.00 | A | O |
| ATOM | 2864 | N   | TYR A 472 | -15.214 | -39.039 | 9.358  | 1.00 | 0.00 | A | N |
| ATOM | 2865 | CA  | TYR A 472 | -15.497 | -39.973 | 8.312  | 1.00 | 0.00 | A | C |
| ATOM | 2866 | CB  | TYR A 472 | -16.920 | -40.552 | 8.430  | 1.00 | 0.00 | A | C |
| ATOM | 2867 | CG  | TYR A 472 | -17.095 | -41.636 | 7.422  | 1.00 | 0.00 | A | C |
| ATOM | 2868 | CD1 | TYR A 472 | -16.487 | -42.860 | 7.597  | 1.00 | 0.00 | A | C |



|      |      |               |         |         |        |      |      |   |   |
|------|------|---------------|---------|---------|--------|------|------|---|---|
| ATOM | 2869 | CE1 TYR A 472 | -16.650 | -43.868 | 6.674  | 1.00 | 0.00 | A | C |
| ATOM | 2870 | CZ TYR A 472  | -17.433 | -43.662 | 5.565  | 1.00 | 0.00 | A | C |
| ATOM | 2871 | OH TYR A 472  | -17.606 | -44.693 | 4.616  | 1.00 | 0.00 | A | O |
| ATOM | 2872 | CD2 TYR A 472 | -17.886 | -41.445 | 6.313  | 1.00 | 0.00 | A | C |
| ATOM | 2873 | CE2 TYR A 472 | -18.053 | -42.449 | 5.386  | 1.00 | 0.00 | A | C |
| ATOM | 2874 | C TYR A 472   | -15.354 | -39.289 | 6.982  | 1.00 | 0.00 | A | C |
| ATOM | 2875 | O TYR A 472   | -14.708 | -39.816 | 6.078  | 1.00 | 0.00 | A | O |
| ATOM | 2876 | N PHE A 473   | -15.935 | -38.080 | 6.834  | 1.00 | 0.00 | A | N |
| ATOM | 2877 | CA PHE A 473  | -15.913 | -37.390 | 5.573  | 1.00 | 0.00 | A | C |
| ATOM | 2878 | CB PHE A 473  | -16.735 | -36.089 | 5.544  | 1.00 | 0.00 | A | C |
| ATOM | 2879 | CG PHE A 473  | -18.177 | -36.434 | 5.470  | 1.00 | 0.00 | A | C |
| ATOM | 2880 | CD1 PHE A 473 | -18.724 | -36.840 | 4.275  | 1.00 | 0.00 | A | C |
| ATOM | 2881 | CE1 PHE A 473 | -20.060 | -37.156 | 4.185  | 1.00 | 0.00 | A | C |
| ATOM | 2882 | CZ PHE A 473  | -20.858 | -37.063 | 5.298  | 1.00 | 0.00 | A | C |
| ATOM | 2883 | CD2 PHE A 473 | -18.987 | -36.336 | 6.579  | 1.00 | 0.00 | A | C |
| ATOM | 2884 | CE2 PHE A 473 | -20.323 | -36.651 | 6.494  | 1.00 | 0.00 | A | C |
| ATOM | 2885 | C PHE A 473   | -14.524 | -36.997 | 5.173  | 1.00 | 0.00 | A | C |
| ATOM | 2886 | O PHE A 473   | -14.130 | -37.194 | 4.025  | 1.00 | 0.00 | A | O |
| ATOM | 2887 | N ARG A 474   | -13.746 | -36.418 | 6.104  | 1.00 | 0.00 | A | N |
| ATOM | 2888 | CA ARG A 474  | -12.449 | -35.921 | 5.745  | 1.00 | 0.00 | A | C |
| ATOM | 2889 | CB ARG A 474  | -11.757 | -35.147 | 6.877  | 1.00 | 0.00 | A | C |
| ATOM | 2890 | CG ARG A 474  | -11.441 | -35.983 | 8.115  | 1.00 | 0.00 | A | C |
| ATOM | 2891 | CD ARG A 474  | -10.801 | -35.156 | 9.229  | 1.00 | 0.00 | A | C |
| ATOM | 2892 | NE ARG A 474  | -10.227 | -36.104 | 10.223 | 1.00 | 0.00 | A | N |
| ATOM | 2893 | CZ ARG A 474  | -8.935  | -36.517 | 10.084 | 1.00 | 0.00 | A | C |
| ATOM | 2894 | NH1 ARG A 474 | -8.170  | -36.033 | 9.063  | 1.00 | 0.00 | A | N |
| ATOM | 2895 | NH2 ARG A 474 | -8.408  | -37.417 | 10.965 | 1.00 | 0.00 | A | N |
| ATOM | 2896 | C ARG A 474   | -11.546 | -37.048 | 5.343  | 1.00 | 0.00 | A | C |
| ATOM | 2897 | O ARG A 474   | -10.776 | -36.919 | 4.391  | 1.00 | 0.00 | A | O |
| ATOM | 2898 | N VAL A 475   | -11.622 | -38.187 | 6.052  | 1.00 | 0.00 | A | N |
| ATOM | 2899 | CA VAL A 475  | -10.763 | -39.306 | 5.778  | 1.00 | 0.00 | A | C |
| ATOM | 2900 | CB VAL A 475  | -10.971 | -40.458 | 6.715  | 1.00 | 0.00 | A | C |
| ATOM | 2901 | CG1 VAL A 475 | -10.100 | -41.630 | 6.232  | 1.00 | 0.00 | A | C |
| ATOM | 2902 | CG2 VAL A 475 | -10.623 | -40.003 | 8.142  | 1.00 | 0.00 | A | C |
| ATOM | 2903 | C VAL A 475   | -11.007 | -39.801 | 4.390  | 1.00 | 0.00 | A | C |
| ATOM | 2904 | O VAL A 475   | -10.073 | -40.174 | 3.683  | 1.00 | 0.00 | A | O |
| ATOM | 2905 | N THR A 476   | -12.280 | -39.837 | 3.957  | 1.00 | 0.00 | A | N |
| ATOM | 2906 | CA THR A 476  | -12.559 | -40.340 | 2.645  | 1.00 | 0.00 | A | C |

|      |      |     |     |   |     |         |         |        |      |      |   |   |
|------|------|-----|-----|---|-----|---------|---------|--------|------|------|---|---|
| ATOM | 2907 | CB  | THR | A | 476 | -14.028 | -40.391 | 2.333  | 1.00 | 0.00 | A | C |
| ATOM | 2908 | OG1 | THR | A | 476 | -14.582 | -39.085 | 2.329  | 1.00 | 0.00 | A | O |
| ATOM | 2909 | CG2 | THR | A | 476 | -14.723 | -41.258 | 3.396  | 1.00 | 0.00 | A | C |
| ATOM | 2910 | C   | THR | A | 476 | -11.904 | -39.431 | 1.652  | 1.00 | 0.00 | A | C |
| ATOM | 2911 | O   | THR | A | 476 | -11.330 | -39.886 | 0.663  | 1.00 | 0.00 | A | O |
| ATOM | 2912 | N   | GLY | A | 477 | -11.964 | -38.113 | 1.908  | 1.00 | 0.00 | A | N |
| ATOM | 2913 | CA  | GLY | A | 477 | -11.422 | -37.157 | 0.986  | 1.00 | 0.00 | A | C |
| ATOM | 2914 | C   | GLY | A | 477 | -9.943  | -37.341 | 0.844  | 1.00 | 0.00 | A | C |
| ATOM | 2915 | O   | GLY | A | 477 | -9.406  | -37.231 | -0.257 | 1.00 | 0.00 | A | O |
| ATOM | 2916 | N   | GLU | A | 478 | -9.236  | -37.608 | 1.958  | 1.00 | 0.00 | A | N |
| ATOM | 2917 | CA  | GLU | A | 478 | -7.808  | -37.725 | 1.901  | 1.00 | 0.00 | A | C |
| ATOM | 2918 | CB  | GLU | A | 478 | -7.156  | -37.939 | 3.281  | 1.00 | 0.00 | A | C |
| ATOM | 2919 | CG  | GLU | A | 478 | -7.487  | -39.289 | 3.916  | 1.00 | 0.00 | A | C |
| ATOM | 2920 | CD  | GLU | A | 478 | -6.829  | -39.358 | 5.285  | 1.00 | 0.00 | A | C |
| ATOM | 2921 | OE1 | GLU | A | 478 | -6.477  | -38.279 | 5.831  | 1.00 | 0.00 | A | O |
| ATOM | 2922 | OE2 | GLU | A | 478 | -6.675  | -40.495 | 5.807  | 1.00 | 0.00 | A | O |
| ATOM | 2923 | C   | GLU | A | 478 | -7.441  | -38.896 | 1.048  | 1.00 | 0.00 | A | C |
| ATOM | 2924 | O   | GLU | A | 478 | -6.526  | -38.813 | 0.229  | 1.00 | 0.00 | A | O |
| ATOM | 2925 | N   | ILE | A | 479 | -8.146  | -40.028 | 1.221  | 1.00 | 0.00 | A | N |
| ATOM | 2926 | CA  | ILE | A | 479 | -7.842  | -41.196 | 0.447  | 1.00 | 0.00 | A | C |
| ATOM | 2927 | CB  | ILE | A | 479 | -8.633  | -42.408 | 0.846  | 1.00 | 0.00 | A | C |
| ATOM | 2928 | CG2 | ILE | A | 479 | -8.374  | -43.506 | -0.201 | 1.00 | 0.00 | A | C |
| ATOM | 2929 | CG1 | ILE | A | 479 | -8.283  | -42.832 | 2.283  | 1.00 | 0.00 | A | C |
| ATOM | 2930 | CD  | ILE | A | 479 | -9.206  | -43.911 | 2.845  | 1.00 | 0.00 | A | C |
| ATOM | 2931 | C   | ILE | A | 479 | -8.135  | -40.912 | -0.992 | 1.00 | 0.00 | A | C |
| ATOM | 2932 | O   | ILE | A | 479 | -7.358  | -41.270 | -1.875 | 1.00 | 0.00 | A | O |
| ATOM | 2933 | N   | LEU | A | 480 | -9.271  | -40.242 | -1.258 | 1.00 | 0.00 | A | N |
| ATOM | 2934 | CA  | LEU | A | 480 | -9.703  | -39.982 | -2.600 | 1.00 | 0.00 | A | C |
| ATOM | 2935 | CB  | LEU | A | 480 | -11.067 | -39.277 | -2.653 | 1.00 | 0.00 | A | C |
| ATOM | 2936 | CG  | LEU | A | 480 | -12.198 | -40.114 | -2.025 | 1.00 | 0.00 | A | C |
| ATOM | 2937 | CD1 | LEU | A | 480 | -13.565 | -39.434 | -2.200 | 1.00 | 0.00 | A | C |
| ATOM | 2938 | CD2 | LEU | A | 480 | -12.169 | -41.562 | -2.542 | 1.00 | 0.00 | A | C |
| ATOM | 2939 | C   | LEU | A | 480 | -8.708  | -39.105 | -3.301 | 1.00 | 0.00 | A | C |
| ATOM | 2940 | O   | LEU | A | 480 | -8.393  | -39.329 | -4.466 | 1.00 | 0.00 | A | O |
| ATOM | 2941 | N   | SER | A | 481 | -8.180  | -38.082 | -2.605 | 1.00 | 0.00 | A | N |
| ATOM | 2942 | CA  | SER | A | 481 | -7.271  | -37.170 | -3.238 | 1.00 | 0.00 | A | C |
| ATOM | 2943 | CB  | SER | A | 481 | -6.835  | -36.023 | -2.311 | 1.00 | 0.00 | A | C |
| ATOM | 2944 | OG  | SER | A | 481 | -6.097  | -36.531 | -1.211 | 1.00 | 0.00 | A | O |

|      |      |     |           |        |         |         |      |      |   |   |
|------|------|-----|-----------|--------|---------|---------|------|------|---|---|
| ATOM | 2945 | C   | SER A 481 | -6.033 | -37.902 | -3.664  | 1.00 | 0.00 | A | C |
| ATOM | 2946 | O   | SER A 481 | -5.520 | -37.684 | -4.760  | 1.00 | 0.00 | A | O |
| ATOM | 2947 | N   | VAL A 482 | -5.514 | -38.796 | -2.805  | 1.00 | 0.00 | A | N |
| ATOM | 2948 | CA  | VAL A 482 | -4.313 | -39.506 | -3.135  | 1.00 | 0.00 | A | C |
| ATOM | 2949 | CB  | VAL A 482 | -3.854 | -40.418 | -2.037  | 1.00 | 0.00 | A | C |
| ATOM | 2950 | CG1 | VAL A 482 | -2.570 | -41.132 | -2.493  | 1.00 | 0.00 | A | C |
| ATOM | 2951 | CG2 | VAL A 482 | -3.705 | -39.596 | -0.744  | 1.00 | 0.00 | A | C |
| ATOM | 2952 | C   | VAL A 482 | -4.580 | -40.356 | -4.335  | 1.00 | 0.00 | A | C |
| ATOM | 2953 | O   | VAL A 482 | -3.768 | -40.427 | -5.258  | 1.00 | 0.00 | A | O |
| ATOM | 2954 | N   | LEU A 483 | -5.757 | -41.013 | -4.354  | 1.00 | 0.00 | A | N |
| ATOM | 2955 | CA  | LEU A 483 | -6.127 | -41.904 | -5.415  | 1.00 | 0.00 | A | C |
| ATOM | 2956 | CB  | LEU A 483 | -7.519 | -42.528 | -5.178  | 1.00 | 0.00 | A | C |
| ATOM | 2957 | CG  | LEU A 483 | -7.952 | -43.663 | -6.142  | 1.00 | 0.00 | A | C |
| ATOM | 2958 | CD1 | LEU A 483 | -9.353 | -44.173 | -5.776  | 1.00 | 0.00 | A | C |
| ATOM | 2959 | CD2 | LEU A 483 | -7.876 | -43.270 | -7.626  | 1.00 | 0.00 | A | C |
| ATOM | 2960 | C   | LEU A 483 | -6.172 | -41.084 | -6.661  | 1.00 | 0.00 | A | C |
| ATOM | 2961 | O   | LEU A 483 | -5.748 | -41.528 | -7.727  | 1.00 | 0.00 | A | O |
| ATOM | 2962 | N   | GLY A 484 | -6.696 | -39.852 | -6.555  | 1.00 | 0.00 | A | N |
| ATOM | 2963 | CA  | GLY A 484 | -6.786 | -39.001 | -7.698  | 1.00 | 0.00 | A | C |
| ATOM | 2964 | C   | GLY A 484 | -5.396 | -38.736 | -8.178  | 1.00 | 0.00 | A | C |
| ATOM | 2965 | O   | GLY A 484 | -5.148 | -38.619 | -9.377  | 1.00 | 0.00 | A | O |
| ATOM | 2966 | N   | GLY A 485 | -4.453 | -38.611 | -7.231  | 1.00 | 0.00 | A | N |
| ATOM | 2967 | CA  | GLY A 485 | -3.089 | -38.300 | -7.549  | 1.00 | 0.00 | A | C |
| ATOM | 2968 | C   | GLY A 485 | -2.460 | -39.381 | -8.378  | 1.00 | 0.00 | A | C |
| ATOM | 2969 | O   | GLY A 485 | -1.688 | -39.091 | -9.288  | 1.00 | 0.00 | A | O |
| ATOM | 2970 | N   | VAL A 486 | -2.759 | -40.659 | -8.079  | 1.00 | 0.00 | A | N |
| ATOM | 2971 | CA  | VAL A 486 | -2.104 | -41.753 | -8.749  | 1.00 | 0.00 | A | C |
| ATOM | 2972 | CB  | VAL A 486 | -2.486 | -43.095 | -8.202  | 1.00 | 0.00 | A | C |
| ATOM | 2973 | CG1 | VAL A 486 | -3.939 | -43.398 | -8.601  | 1.00 | 0.00 | A | C |
| ATOM | 2974 | CG2 | VAL A 486 | -1.470 | -44.134 | -8.704  | 1.00 | 0.00 | A | C |
| ATOM | 2975 | C   | VAL A 486 | -2.421 | -41.755 | -10.214 | 1.00 | 0.00 | A | C |
| ATOM | 2976 | O   | VAL A 486 | -1.565 | -42.068 | -11.041 | 1.00 | 0.00 | A | O |
| ATOM | 2977 | N   | TYR A 487 | -3.661 | -41.395 | -10.584 | 1.00 | 0.00 | A | N |
| ATOM | 2978 | CA  | TYR A 487 | -4.051 | -41.497 | -11.961 | 1.00 | 0.00 | A | C |
| ATOM | 2979 | CB  | TYR A 487 | -5.513 | -41.099 | -12.207 | 1.00 | 0.00 | A | C |
| ATOM | 2980 | CG  | TYR A 487 | -5.745 | -41.327 | -13.657 | 1.00 | 0.00 | A | C |
| ATOM | 2981 | CD1 | TYR A 487 | -5.998 | -42.601 | -14.108 | 1.00 | 0.00 | A | C |
| ATOM | 2982 | CE1 | TYR A 487 | -6.207 | -42.844 | -15.442 | 1.00 | 0.00 | A | C |

|      |      |     |     |   |     |        |         |         |      |      |   |   |
|------|------|-----|-----|---|-----|--------|---------|---------|------|------|---|---|
| ATOM | 2983 | CZ  | TYR | A | 487 | -6.157 | -41.810 | -16.340 | 1.00 | 0.00 | A | C |
| ATOM | 2984 | OH  | TYR | A | 487 | -6.374 | -42.058 | -17.712 | 1.00 | 0.00 | A | O |
| ATOM | 2985 | CD2 | TYR | A | 487 | -5.680 | -40.294 | -14.564 | 1.00 | 0.00 | A | C |
| ATOM | 2986 | CE2 | TYR | A | 487 | -5.892 | -40.534 | -15.901 | 1.00 | 0.00 | A | C |
| ATOM | 2987 | C   | TYR | A | 487 | -3.182 | -40.614 | -12.800 | 1.00 | 0.00 | A | C |
| ATOM | 2988 | O   | TYR | A | 487 | -2.755 | -41.004 | -13.885 | 1.00 | 0.00 | A | O |
| ATOM | 2989 | N   | PHE | A | 488 | -2.892 | -39.397 | -12.310 | 1.00 | 0.00 | A | N |
| ATOM | 2990 | CA  | PHE | A | 488 | -2.088 | -38.465 | -13.042 | 1.00 | 0.00 | A | C |
| ATOM | 2991 | CB  | PHE | A | 488 | -1.885 | -37.135 | -12.286 | 1.00 | 0.00 | A | C |
| ATOM | 2992 | CG  | PHE | A | 488 | -3.180 | -36.396 | -12.182 | 1.00 | 0.00 | A | C |
| ATOM | 2993 | CD1 | PHE | A | 488 | -3.647 | -35.654 | -13.243 | 1.00 | 0.00 | A | C |
| ATOM | 2994 | CE1 | PHE | A | 488 | -4.834 | -34.964 | -13.152 | 1.00 | 0.00 | A | C |
| ATOM | 2995 | CZ  | PHE | A | 488 | -5.569 | -35.003 | -11.991 | 1.00 | 0.00 | A | C |
| ATOM | 2996 | CD2 | PHE | A | 488 | -3.920 | -36.419 | -11.018 | 1.00 | 0.00 | A | C |
| ATOM | 2997 | CE2 | PHE | A | 488 | -5.108 | -35.730 | -10.921 | 1.00 | 0.00 | A | C |
| ATOM | 2998 | C   | PHE | A | 488 | -0.727 | -39.059 | -13.250 | 1.00 | 0.00 | A | C |
| ATOM | 2999 | O   | PHE | A | 488 | -0.159 | -38.958 | -14.338 | 1.00 | 0.00 | A | O |
| ATOM | 3000 | N   | PHE | A | 489 | -0.155 | -39.692 | -12.205 | 1.00 | 0.00 | A | N |
| ATOM | 3001 | CA  | PHE | A | 489 | 1.167  | -40.238 | -12.324 | 1.00 | 0.00 | A | C |
| ATOM | 3002 | CB  | PHE | A | 489 | 1.712  | -40.843 | -11.018 | 1.00 | 0.00 | A | C |
| ATOM | 3003 | CG  | PHE | A | 489 | 3.089  | -41.333 | -11.320 | 1.00 | 0.00 | A | C |
| ATOM | 3004 | CD1 | PHE | A | 489 | 4.171  | -40.493 | -11.176 | 1.00 | 0.00 | A | C |
| ATOM | 3005 | CE1 | PHE | A | 489 | 5.445  | -40.932 | -11.455 | 1.00 | 0.00 | A | C |
| ATOM | 3006 | CZ  | PHE | A | 489 | 5.648  | -42.220 | -11.888 | 1.00 | 0.00 | A | C |
| ATOM | 3007 | CD2 | PHE | A | 489 | 3.302  | -42.619 | -11.760 | 1.00 | 0.00 | A | C |
| ATOM | 3008 | CE2 | PHE | A | 489 | 4.575  | -43.062 | -12.041 | 1.00 | 0.00 | A | C |
| ATOM | 3009 | C   | PHE | A | 489 | 1.163  | -41.329 | -13.349 | 1.00 | 0.00 | A | C |
| ATOM | 3010 | O   | PHE | A | 489 | 2.067  | -41.414 | -14.178 | 1.00 | 0.00 | A | O |
| ATOM | 3011 | N   | PHE | A | 490 | 0.142  | -42.207 | -13.315 | 1.00 | 0.00 | A | N |
| ATOM | 3012 | CA  | PHE | A | 490 | 0.079  | -43.307 | -14.238 | 1.00 | 0.00 | A | C |
| ATOM | 3013 | CB  | PHE | A | 490 | -1.098 | -44.258 | -13.950 | 1.00 | 0.00 | A | C |
| ATOM | 3014 | CG  | PHE | A | 490 | -1.128 | -45.332 | -14.985 | 1.00 | 0.00 | A | C |
| ATOM | 3015 | CD1 | PHE | A | 490 | -0.186 | -46.337 | -14.998 | 1.00 | 0.00 | A | C |
| ATOM | 3016 | CE1 | PHE | A | 490 | -0.231 | -47.324 | -15.954 | 1.00 | 0.00 | A | C |
| ATOM | 3017 | CZ  | PHE | A | 490 | -1.225 | -47.323 | -16.904 | 1.00 | 0.00 | A | C |
| ATOM | 3018 | CD2 | PHE | A | 490 | -2.123 | -45.345 | -15.935 | 1.00 | 0.00 | A | C |
| ATOM | 3019 | CE2 | PHE | A | 490 | -2.174 | -46.331 | -16.892 | 1.00 | 0.00 | A | C |
| ATOM | 3020 | C   | PHE | A | 490 | -0.059 | -42.789 | -15.636 | 1.00 | 0.00 | A | C |

|      |      |     |           |        |         |         |      |      |   |   |
|------|------|-----|-----------|--------|---------|---------|------|------|---|---|
| ATOM | 3021 | O   | PHE A 490 | 0.620  | -43.262 | -16.545 | 1.00 | 0.00 | A | O |
| ATOM | 3022 | N   | ARG A 491 | -0.944 | -41.800 | -15.851 | 1.00 | 0.00 | A | N |
| ATOM | 3023 | CA  | ARG A 491 | -1.159 | -41.289 | -17.176 | 1.00 | 0.00 | A | C |
| ATOM | 3024 | CB  | ARG A 491 | -2.323 | -40.281 | -17.248 | 1.00 | 0.00 | A | C |
| ATOM | 3025 | CG  | ARG A 491 | -2.154 | -39.059 | -16.344 | 1.00 | 0.00 | A | C |
| ATOM | 3026 | CD  | ARG A 491 | -3.418 | -38.199 | -16.242 | 1.00 | 0.00 | A | C |
| ATOM | 3027 | NE  | ARG A 491 | -3.539 | -37.410 | -17.499 | 1.00 | 0.00 | A | N |
| ATOM | 3028 | CZ  | ARG A 491 | -3.168 | -36.097 | -17.513 | 1.00 | 0.00 | A | C |
| ATOM | 3029 | NH1 | ARG A 491 | -2.751 | -35.495 | -16.361 | 1.00 | 0.00 | A | N |
| ATOM | 3030 | NH2 | ARG A 491 | -3.223 | -35.382 | -18.675 | 1.00 | 0.00 | A | N |
| ATOM | 3031 | C   | ARG A 491 | 0.087  | -40.629 | -17.684 | 1.00 | 0.00 | A | C |
| ATOM | 3032 | O   | ARG A 491 | 0.434  | -40.769 | -18.855 | 1.00 | 0.00 | A | O |
| ATOM | 3033 | N   | GLY A 492 | 0.796  | -39.887 | -16.813 | 1.00 | 0.00 | A | N |
| ATOM | 3034 | CA  | GLY A 492 | 1.969  | -39.153 | -17.206 | 1.00 | 0.00 | A | C |
| ATOM | 3035 | C   | GLY A 492 | 3.065  | -40.069 | -17.662 | 1.00 | 0.00 | A | C |
| ATOM | 3036 | O   | GLY A 492 | 3.773  | -39.769 | -18.623 | 1.00 | 0.00 | A | O |
| ATOM | 3037 | N   | ILE A 493 | 3.238  | -41.215 | -16.978 | 1.00 | 0.00 | A | N |
| ATOM | 3038 | CA  | ILE A 493 | 4.325  | -42.096 | -17.291 | 1.00 | 0.00 | A | C |
| ATOM | 3039 | CB  | ILE A 493 | 4.405  | -43.294 | -16.385 | 1.00 | 0.00 | A | C |
| ATOM | 3040 | CG2 | ILE A 493 | 3.195  | -44.204 | -16.649 | 1.00 | 0.00 | A | C |
| ATOM | 3041 | CG1 | ILE A 493 | 5.764  | -43.995 | -16.552 | 1.00 | 0.00 | A | C |
| ATOM | 3042 | CD  | ILE A 493 | 6.062  | -45.010 | -15.450 | 1.00 | 0.00 | A | C |
| ATOM | 3043 | C   | ILE A 493 | 4.174  | -42.565 | -18.697 | 1.00 | 0.00 | A | C |
| ATOM | 3044 | O   | ILE A 493 | 5.158  | -42.674 | -19.424 | 1.00 | 0.00 | A | O |
| ATOM | 3045 | N   | GLN A 494 | 2.933  | -42.855 | -19.117 | 1.00 | 0.00 | A | N |
| ATOM | 3046 | CA  | GLN A 494 | 2.673  | -43.326 | -20.445 | 1.00 | 0.00 | A | C |
| ATOM | 3047 | CB  | GLN A 494 | 1.182  | -43.587 | -20.702 | 1.00 | 0.00 | A | C |
| ATOM | 3048 | CG  | GLN A 494 | 0.889  | -44.091 | -22.117 | 1.00 | 0.00 | A | C |
| ATOM | 3049 | CD  | GLN A 494 | -0.621 | -44.134 | -22.288 | 1.00 | 0.00 | A | C |
| ATOM | 3050 | OE1 | GLN A 494 | -1.161 | -44.992 | -22.983 | 1.00 | 0.00 | A | O |
| ATOM | 3051 | NE2 | GLN A 494 | -1.326 | -43.169 | -21.638 | 1.00 | 0.00 | A | N |
| ATOM | 3052 | C   | GLN A 494 | 3.074  | -42.268 | -21.414 | 1.00 | 0.00 | A | C |
| ATOM | 3053 | O   | GLN A 494 | 3.583  | -42.569 | -22.487 | 1.00 | 0.00 | A | O |
| ATOM | 3054 | N   | TYR A 495 | 2.839  | -40.990 | -21.086 | 1.00 | 0.00 | A | N |
| ATOM | 3055 | CA  | TYR A 495 | 3.167  | -39.954 | -22.022 | 1.00 | 0.00 | A | C |
| ATOM | 3056 | CB  | TYR A 495 | 2.738  | -38.566 | -21.524 | 1.00 | 0.00 | A | C |
| ATOM | 3057 | CG  | TYR A 495 | 2.842  | -37.604 | -22.657 | 1.00 | 0.00 | A | C |
| ATOM | 3058 | CD1 | TYR A 495 | 4.016  | -36.942 | -22.929 | 1.00 | 0.00 | A | C |

|      |      |               |        |         |         |      |      |   |   |
|------|------|---------------|--------|---------|---------|------|------|---|---|
| ATOM | 3059 | CE1 TYR A 495 | 4.085  | -36.058 | -23.980 | 1.00 | 0.00 | A | C |
| ATOM | 3060 | CZ TYR A 495  | 2.981  | -35.830 | -24.768 | 1.00 | 0.00 | A | C |
| ATOM | 3061 | OH TYR A 495  | 3.052  | -34.920 | -25.844 | 1.00 | 0.00 | A | O |
| ATOM | 3062 | CD2 TYR A 495 | 1.746  | -37.375 | -23.454 | 1.00 | 0.00 | A | C |
| ATOM | 3063 | CE2 TYR A 495 | 1.808  | -36.492 | -24.506 | 1.00 | 0.00 | A | C |
| ATOM | 3064 | C TYR A 495   | 4.649  | -39.963 | -22.216 | 1.00 | 0.00 | A | C |
| ATOM | 3065 | O TYR A 495   | 5.145  | -39.839 | -23.335 | 1.00 | 0.00 | A | O |
| ATOM | 3066 | N PHE A 496   | 5.400  | -40.096 | -21.108 | 1.00 | 0.00 | A | N |
| ATOM | 3067 | CA PHE A 496  | 6.830  | -40.129 | -21.159 | 1.00 | 0.00 | A | C |
| ATOM | 3068 | CB PHE A 496  | 7.438  | -40.180 | -19.743 | 1.00 | 0.00 | A | C |
| ATOM | 3069 | CG PHE A 496  | 8.923  | -40.067 | -19.809 | 1.00 | 0.00 | A | C |
| ATOM | 3070 | CD1 PHE A 496 | 9.517  | -38.851 | -20.051 | 1.00 | 0.00 | A | C |
| ATOM | 3071 | CE1 PHE A 496 | 10.885 | -38.733 | -20.104 | 1.00 | 0.00 | A | C |
| ATOM | 3072 | CZ PHE A 496  | 11.678 | -39.839 | -19.905 | 1.00 | 0.00 | A | C |
| ATOM | 3073 | CD2 PHE A 496 | 9.725  | -41.167 | -19.600 | 1.00 | 0.00 | A | C |
| ATOM | 3074 | CE2 PHE A 496 | 11.096 | -41.057 | -19.650 | 1.00 | 0.00 | A | C |
| ATOM | 3075 | C PHE A 496   | 7.256  | -41.361 | -21.894 | 1.00 | 0.00 | A | C |
| ATOM | 3076 | O PHE A 496   | 8.122  | -41.306 | -22.767 | 1.00 | 0.00 | A | O |
| ATOM | 3077 | N LEU A 497   | 6.640  | -42.512 | -21.560 | 1.00 | 0.00 | A | N |
| ATOM | 3078 | CA LEU A 497  | 7.024  | -43.780 | -22.108 | 1.00 | 0.00 | A | C |
| ATOM | 3079 | CB LEU A 497  | 6.361  | -44.966 | -21.375 | 1.00 | 0.00 | A | C |
| ATOM | 3080 | CG LEU A 497  | 6.931  | -46.365 | -21.712 | 1.00 | 0.00 | A | C |
| ATOM | 3081 | CD1 LEU A 497 | 6.331  | -47.421 | -20.773 | 1.00 | 0.00 | A | C |
| ATOM | 3082 | CD2 LEU A 497 | 6.745  | -46.761 | -23.187 | 1.00 | 0.00 | A | C |
| ATOM | 3083 | C LEU A 497   | 6.711  | -43.856 | -23.570 | 1.00 | 0.00 | A | C |
| ATOM | 3084 | O LEU A 497   | 7.514  | -44.351 | -24.358 | 1.00 | 0.00 | A | O |
| ATOM | 3085 | N GLN A 498   | 5.536  | -43.365 | -23.983 | 1.00 | 0.00 | A | N |
| ATOM | 3086 | CA GLN A 498  | 5.104  | -43.459 | -25.343 | 1.00 | 0.00 | A | C |
| ATOM | 3087 | CB GLN A 498  | 3.734  | -42.795 | -25.517 | 1.00 | 0.00 | A | C |
| ATOM | 3088 | CG GLN A 498  | 3.157  | -42.841 | -26.925 | 1.00 | 0.00 | A | C |
| ATOM | 3089 | CD GLN A 498  | 1.818  | -42.131 | -26.826 | 1.00 | 0.00 | A | C |
| ATOM | 3090 | OE1 GLN A 498 | 1.737  | -41.025 | -26.293 | 1.00 | 0.00 | A | O |
| ATOM | 3091 | NE2 GLN A 498 | 0.738  | -42.789 | -27.322 | 1.00 | 0.00 | A | N |
| ATOM | 3092 | C GLN A 498   | 6.091  | -42.722 | -26.182 | 1.00 | 0.00 | A | C |
| ATOM | 3093 | O GLN A 498   | 6.539  | -43.230 | -27.210 | 1.00 | 0.00 | A | O |
| ATOM | 3094 | N ARG A 499   | 6.465  | -41.502 | -25.758 | 1.00 | 0.00 | A | N |
| ATOM | 3095 | CA ARG A 499  | 7.447  | -40.789 | -26.512 | 1.00 | 0.00 | A | C |
| ATOM | 3096 | CB ARG A 499  | 6.955  | -39.447 | -27.075 | 1.00 | 0.00 | A | C |

|      |      |     |     |       |        |         |         |      |      |   |   |
|------|------|-----|-----|-------|--------|---------|---------|------|------|---|---|
| ATOM | 3097 | CG  | ARG | A 499 | 5.950  | -39.631 | -28.210 | 1.00 | 0.00 | A | C |
| ATOM | 3098 | CD  | ARG | A 499 | 6.582  | -40.284 | -29.439 | 1.00 | 0.00 | A | C |
| ATOM | 3099 | NE  | ARG | A 499 | 5.531  | -40.391 | -30.487 | 1.00 | 0.00 | A | N |
| ATOM | 3100 | CZ  | ARG | A 499 | 5.838  | -40.075 | -31.776 | 1.00 | 0.00 | A | C |
| ATOM | 3101 | NH1 | ARG | A 499 | 7.106  | -39.685 | -32.098 | 1.00 | 0.00 | A | N |
| ATOM | 3102 | NH2 | ARG | A 499 | 4.873  | -40.121 | -32.741 | 1.00 | 0.00 | A | N |
| ATOM | 3103 | C   | ARG | A 499 | 8.595  | -40.509 | -25.606 | 1.00 | 0.00 | A | C |
| ATOM | 3104 | O   | ARG | A 499 | 8.567  | -39.590 | -24.788 | 1.00 | 0.00 | A | O |
| ATOM | 3105 | N   | ARG | A 500 | 9.650  | -41.314 | -25.777 | 1.00 | 0.00 | A | N |
| ATOM | 3106 | CA  | ARG | A 500 | 10.870 | -41.264 | -25.032 | 1.00 | 0.00 | A | C |
| ATOM | 3107 | CB  | ARG | A 500 | 11.829 | -42.378 | -25.477 | 1.00 | 0.00 | A | C |
| ATOM | 3108 | CG  | ARG | A 500 | 11.238 | -43.775 | -25.309 | 1.00 | 0.00 | A | C |
| ATOM | 3109 | CD  | ARG | A 500 | 11.966 | -44.842 | -26.127 | 1.00 | 0.00 | A | C |
| ATOM | 3110 | NE  | ARG | A 500 | 11.707 | -44.554 | -27.567 | 1.00 | 0.00 | A | N |
| ATOM | 3111 | CZ  | ARG | A 500 | 12.522 | -45.081 | -28.527 | 1.00 | 0.00 | A | C |
| ATOM | 3112 | NH1 | ARG | A 500 | 13.601 | -45.834 | -28.164 | 1.00 | 0.00 | A | N |
| ATOM | 3113 | NH2 | ARG | A 500 | 12.258 | -44.855 | -29.847 | 1.00 | 0.00 | A | N |
| ATOM | 3114 | C   | ARG | A 500 | 11.572 | -39.966 | -25.296 | 1.00 | 0.00 | A | C |
| ATOM | 3115 | O   | ARG | A 500 | 12.129 | -39.378 | -24.368 | 1.00 | 0.00 | A | O |
| ATOM | 3116 | N   | PRO | A 501 | 11.568 | -39.473 | -26.510 | 1.00 | 0.00 | A | N |
| ATOM | 3117 | CD  | PRO | A 501 | 11.577 | -40.323 | -27.692 | 1.00 | 0.00 | A | C |
| ATOM | 3118 | CA  | PRO | A 501 | 12.296 | -38.265 | -26.770 | 1.00 | 0.00 | A | C |
| ATOM | 3119 | CB  | PRO | A 501 | 12.309 | -38.090 | -28.293 | 1.00 | 0.00 | A | C |
| ATOM | 3120 | CG  | PRO | A 501 | 11.532 | -39.306 | -28.841 | 1.00 | 0.00 | A | C |
| ATOM | 3121 | C   | PRO | A 501 | 11.778 | -37.107 | -25.988 | 1.00 | 0.00 | A | C |
| ATOM | 3122 | O   | PRO | A 501 | 10.577 | -37.018 | -25.743 | 1.00 | 0.00 | A | O |
| ATOM | 3123 | N   | SER | A 502 | 12.690 | -36.200 | -25.595 | 1.00 | 0.00 | A | N |
| ATOM | 3124 | CA  | SER | A 502 | 12.387 | -35.106 | -24.727 | 1.00 | 0.00 | A | C |
| ATOM | 3125 | CB  | SER | A 502 | 13.658 | -34.559 | -24.041 | 1.00 | 0.00 | A | C |
| ATOM | 3126 | OG  | SER | A 502 | 13.356 | -33.574 | -23.065 | 1.00 | 0.00 | A | O |
| ATOM | 3127 | C   | SER | A 502 | 11.747 | -34.008 | -25.503 | 1.00 | 0.00 | A | C |
| ATOM | 3128 | O   | SER | A 502 | 11.412 | -34.159 | -26.674 | 1.00 | 0.00 | A | O |
| ATOM | 3129 | N   | MET | A 503 | 11.479 | -32.895 | -24.804 | 1.00 | 0.00 | A | N |
| ATOM | 3130 | CA  | MET | A 503 | 10.989 | -31.700 | -25.404 | 1.00 | 0.00 | A | C |
| ATOM | 3131 | CB  | MET | A 503 | 9.633  | -31.261 | -24.826 | 1.00 | 0.00 | A | C |
| ATOM | 3132 | CG  | MET | A 503 | 9.605  | -31.203 | -23.300 | 1.00 | 0.00 | A | C |
| ATOM | 3133 | SD  | MET | A 503 | 7.934  | -31.285 | -22.590 | 1.00 | 0.00 | A | S |
| ATOM | 3134 | CE  | MET | A 503 | 7.659  | -33.006 | -23.106 | 1.00 | 0.00 | A | C |

|      |      |     |           |        |         |         |      |      |   |   |
|------|------|-----|-----------|--------|---------|---------|------|------|---|---|
| ATOM | 3135 | C   | MET A 503 | 12.045 | -30.689 | -25.104 | 1.00 | 0.00 | A | C |
| ATOM | 3136 | O   | MET A 503 | 12.567 | -30.640 | -23.991 | 1.00 | 0.00 | A | O |
| ATOM | 3137 | N   | LYS A 504 | 12.401 | -29.872 | -26.110 | 1.00 | 0.00 | A | N |
| ATOM | 3138 | CA  | LYS A 504 | 13.478 | -28.944 | -25.959 | 1.00 | 0.00 | A | C |
| ATOM | 3139 | CB  | LYS A 504 | 13.961 | -28.318 | -27.280 | 1.00 | 0.00 | A | C |
| ATOM | 3140 | CG  | LYS A 504 | 15.299 | -27.590 | -27.141 | 1.00 | 0.00 | A | C |
| ATOM | 3141 | CD  | LYS A 504 | 15.991 | -27.307 | -28.476 | 1.00 | 0.00 | A | C |
| ATOM | 3142 | CE  | LYS A 504 | 17.415 | -26.767 | -28.324 | 1.00 | 0.00 | A | C |
| ATOM | 3143 | NZ  | LYS A 504 | 17.382 | -25.393 | -27.773 | 1.00 | 0.00 | A | N |
| ATOM | 3144 | C   | LYS A 504 | 13.052 | -27.854 | -25.043 | 1.00 | 0.00 | A | C |
| ATOM | 3145 | O   | LYS A 504 | 11.868 | -27.680 | -24.754 | 1.00 | 0.00 | A | O |
| ATOM | 3146 | N   | THR A 505 | 14.045 | -27.112 | -24.528 | 1.00 | 0.00 | A | N |
| ATOM | 3147 | CA  | THR A 505 | 13.791 | -26.048 | -23.613 | 1.00 | 0.00 | A | C |
| ATOM | 3148 | CB  | THR A 505 | 15.048 | -25.383 | -23.142 | 1.00 | 0.00 | A | C |
| ATOM | 3149 | OG1 | THR A 505 | 15.706 | -24.755 | -24.234 | 1.00 | 0.00 | A | O |
| ATOM | 3150 | CG2 | THR A 505 | 15.958 | -26.452 | -22.518 | 1.00 | 0.00 | A | C |
| ATOM | 3151 | C   | THR A 505 | 12.989 | -25.008 | -24.312 | 1.00 | 0.00 | A | C |
| ATOM | 3152 | O   | THR A 505 | 12.066 | -24.440 | -23.734 | 1.00 | 0.00 | A | O |
| ATOM | 3153 | N   | LEU A 506 | 13.306 | -24.743 | -25.594 | 1.00 | 0.00 | A | N |
| ATOM | 3154 | CA  | LEU A 506 | 12.606 | -23.693 | -26.271 | 1.00 | 0.00 | A | C |
| ATOM | 3155 | CB  | LEU A 506 | 13.028 | -23.502 | -27.738 | 1.00 | 0.00 | A | C |
| ATOM | 3156 | CG  | LEU A 506 | 14.444 | -22.933 | -27.924 | 1.00 | 0.00 | A | C |
| ATOM | 3157 | CD1 | LEU A 506 | 14.762 | -22.728 | -29.415 | 1.00 | 0.00 | A | C |
| ATOM | 3158 | CD2 | LEU A 506 | 14.643 | -21.655 | -27.098 | 1.00 | 0.00 | A | C |
| ATOM | 3159 | C   | LEU A 506 | 11.155 | -24.025 | -26.288 | 1.00 | 0.00 | A | C |
| ATOM | 3160 | O   | LEU A 506 | 10.320 | -23.175 | -25.981 | 1.00 | 0.00 | A | O |
| ATOM | 3161 | N   | PHE A 507 | 10.802 | -25.275 | -26.629 | 1.00 | 0.00 | A | N |
| ATOM | 3162 | CA  | PHE A 507 | 9.399  | -25.545 | -26.652 | 1.00 | 0.00 | A | C |
| ATOM | 3163 | CB  | PHE A 507 | 8.912  | -26.280 | -27.914 | 1.00 | 0.00 | A | C |
| ATOM | 3164 | CG  | PHE A 507 | 9.585  | -27.604 | -28.083 | 1.00 | 0.00 | A | C |
| ATOM | 3165 | CD1 | PHE A 507 | 10.846 | -27.680 | -28.632 | 1.00 | 0.00 | A | C |
| ATOM | 3166 | CE1 | PHE A 507 | 11.462 | -28.898 | -28.806 | 1.00 | 0.00 | A | C |
| ATOM | 3167 | CZ  | PHE A 507 | 10.815 | -30.053 | -28.435 | 1.00 | 0.00 | A | C |
| ATOM | 3168 | CD2 | PHE A 507 | 8.943  | -28.769 | -27.723 | 1.00 | 0.00 | A | C |
| ATOM | 3169 | CE2 | PHE A 507 | 9.553  | -29.989 | -27.894 | 1.00 | 0.00 | A | C |
| ATOM | 3170 | C   | PHE A 507 | 9.026  | -26.349 | -25.458 | 1.00 | 0.00 | A | C |
| ATOM | 3171 | O   | PHE A 507 | 9.396  | -27.514 | -25.321 | 1.00 | 0.00 | A | O |
| ATOM | 3172 | N   | VAL A 508 | 8.259  | -25.720 | -24.554 | 1.00 | 0.00 | A | N |



|      |      |     |           |        |         |         |      |      |   |   |
|------|------|-----|-----------|--------|---------|---------|------|------|---|---|
| ATOM | 3173 | CA  | VAL A 508 | 7.784  | -26.408 | -23.409 | 1.00 | 0.00 | A | C |
| ATOM | 3174 | CB  | VAL A 508 | 7.434  | -25.471 | -22.292 | 1.00 | 0.00 | A | C |
| ATOM | 3175 | CG1 | VAL A 508 | 6.920  | -26.293 | -21.103 | 1.00 | 0.00 | A | C |
| ATOM | 3176 | CG2 | VAL A 508 | 8.661  | -24.600 | -21.970 | 1.00 | 0.00 | A | C |
| ATOM | 3177 | C   | VAL A 508 | 6.521  | -27.034 | -23.883 | 1.00 | 0.00 | A | C |
| ATOM | 3178 | O   | VAL A 508 | 5.439  | -26.779 | -23.360 | 1.00 | 0.00 | A | O |
| ATOM | 3179 | N   | ASP A 509 | 6.653  | -27.901 | -24.899 | 1.00 | 0.00 | A | N |
| ATOM | 3180 | CA  | ASP A 509 | 5.508  | -28.541 | -25.458 | 1.00 | 0.00 | A | C |
| ATOM | 3181 | CB  | ASP A 509 | 5.387  | -28.333 | -26.978 | 1.00 | 0.00 | A | C |
| ATOM | 3182 | CG  | ASP A 509 | 4.092  | -28.964 | -27.469 | 1.00 | 0.00 | A | C |
| ATOM | 3183 | OD1 | ASP A 509 | 3.926  | -30.202 | -27.312 | 1.00 | 0.00 | A | O |
| ATOM | 3184 | OD2 | ASP A 509 | 3.245  | -28.205 | -28.012 | 1.00 | 0.00 | A | O |
| ATOM | 3185 | C   | ASP A 509 | 5.668  | -30.004 | -25.208 | 1.00 | 0.00 | A | C |
| ATOM | 3186 | O   | ASP A 509 | 6.712  | -30.578 | -25.516 | 1.00 | 0.00 | A | O |
| ATOM | 3187 | N   | SER A 510 | 4.624  | -30.644 | -24.649 | 1.00 | 0.00 | A | N |
| ATOM | 3188 | CA  | SER A 510 | 3.416  | -29.939 | -24.335 | 1.00 | 0.00 | A | C |
| ATOM | 3189 | CB  | SER A 510 | 2.164  | -30.840 | -24.315 | 1.00 | 0.00 | A | C |
| ATOM | 3190 | OG  | SER A 510 | 2.277  | -31.829 | -23.304 | 1.00 | 0.00 | A | O |
| ATOM | 3191 | C   | SER A 510 | 3.564  | -29.326 | -22.976 | 1.00 | 0.00 | A | C |
| ATOM | 3192 | O   | SER A 510 | 4.035  | -29.956 | -22.032 | 1.00 | 0.00 | A | O |
| ATOM | 3193 | N   | TYR A 511 | 3.165  | -28.044 | -22.871 | 1.00 | 0.00 | A | N |
| ATOM | 3194 | CA  | TYR A 511 | 3.252  | -27.258 | -21.675 | 1.00 | 0.00 | A | C |
| ATOM | 3195 | CB  | TYR A 511 | 2.769  | -25.820 | -21.956 | 1.00 | 0.00 | A | C |
| ATOM | 3196 | CG  | TYR A 511 | 2.575  | -25.041 | -20.694 | 1.00 | 0.00 | A | C |
| ATOM | 3197 | CD1 | TYR A 511 | 1.377  | -25.074 | -20.017 | 1.00 | 0.00 | A | C |
| ATOM | 3198 | CE1 | TYR A 511 | 1.189  | -24.355 | -18.860 | 1.00 | 0.00 | A | C |
| ATOM | 3199 | CZ  | TYR A 511 | 2.209  | -23.584 | -18.366 | 1.00 | 0.00 | A | C |
| ATOM | 3200 | OH  | TYR A 511 | 2.030  | -22.839 | -17.181 | 1.00 | 0.00 | A | O |
| ATOM | 3201 | CD2 | TYR A 511 | 3.584  | -24.261 | -20.189 | 1.00 | 0.00 | A | C |
| ATOM | 3202 | CE2 | TYR A 511 | 3.407  | -23.538 | -19.035 | 1.00 | 0.00 | A | C |
| ATOM | 3203 | C   | TYR A 511 | 2.359  | -27.790 | -20.594 | 1.00 | 0.00 | A | C |
| ATOM | 3204 | O   | TYR A 511 | 2.786  | -27.965 | -19.455 | 1.00 | 0.00 | A | O |
| ATOM | 3205 | N   | SER A 512 | 1.083  | -28.052 | -20.933 | 1.00 | 0.00 | A | N |
| ATOM | 3206 | CA  | SER A 512 | 0.081  | -28.398 | -19.964 | 1.00 | 0.00 | A | C |
| ATOM | 3207 | CB  | SER A 512 | -1.337 | -28.349 | -20.560 | 1.00 | 0.00 | A | C |
| ATOM | 3208 | OG  | SER A 512 | -1.447 | -29.276 | -21.632 | 1.00 | 0.00 | A | O |
| ATOM | 3209 | C   | SER A 512 | 0.276  | -29.752 | -19.364 | 1.00 | 0.00 | A | C |
| ATOM | 3210 | O   | SER A 512 | 0.192  | -29.919 | -18.148 | 1.00 | 0.00 | A | O |

|      |      |     |           |        |         |         |      |      |   |   |
|------|------|-----|-----------|--------|---------|---------|------|------|---|---|
| ATOM | 3211 | N   | GLU A 513 | 0.553  | -30.758 | -20.205 | 1.00 | 0.00 | A | N |
| ATOM | 3212 | CA  | GLU A 513 | 0.649  | -32.101 | -19.720 | 1.00 | 0.00 | A | C |
| ATOM | 3213 | CB  | GLU A 513 | 0.833  | -33.109 | -20.864 | 1.00 | 0.00 | A | C |
| ATOM | 3214 | CG  | GLU A 513 | -0.423 | -33.180 | -21.736 | 1.00 | 0.00 | A | C |
| ATOM | 3215 | CD  | GLU A 513 | -0.130 | -34.066 | -22.932 | 1.00 | 0.00 | A | C |
| ATOM | 3216 | OE1 | GLU A 513 | 1.054  | -34.115 | -23.359 | 1.00 | 0.00 | A | O |
| ATOM | 3217 | OE2 | GLU A 513 | -1.089 | -34.706 | -23.435 | 1.00 | 0.00 | A | O |
| ATOM | 3218 | C   | GLU A 513 | 1.791  | -32.185 | -18.759 | 1.00 | 0.00 | A | C |
| ATOM | 3219 | O   | GLU A 513 | 1.714  | -32.895 | -17.755 | 1.00 | 0.00 | A | O |
| ATOM | 3220 | N   | MET A 514 | 2.876  | -31.436 | -19.020 | 1.00 | 0.00 | A | N |
| ATOM | 3221 | CA  | MET A 514 | 4.021  | -31.504 | -18.156 | 1.00 | 0.00 | A | C |
| ATOM | 3222 | CB  | MET A 514 | 5.218  | -30.650 | -18.612 | 1.00 | 0.00 | A | C |
| ATOM | 3223 | CG  | MET A 514 | 5.026  | -29.147 | -18.406 | 1.00 | 0.00 | A | C |
| ATOM | 3224 | SD  | MET A 514 | 6.516  | -28.145 | -18.691 | 1.00 | 0.00 | A | S |
| ATOM | 3225 | CE  | MET A 514 | 7.152  | -28.262 | -16.995 | 1.00 | 0.00 | A | C |
| ATOM | 3226 | C   | MET A 514 | 3.641  | -31.036 | -16.787 | 1.00 | 0.00 | A | C |
| ATOM | 3227 | O   | MET A 514 | 4.120  | -31.579 | -15.795 | 1.00 | 0.00 | A | O |
| ATOM | 3228 | N   | LEU A 515 | 2.776  | -30.009 | -16.691 | 1.00 | 0.00 | A | N |
| ATOM | 3229 | CA  | LEU A 515 | 2.398  | -29.461 | -15.416 | 1.00 | 0.00 | A | C |
| ATOM | 3230 | CB  | LEU A 515 | 1.472  | -28.240 | -15.543 | 1.00 | 0.00 | A | C |
| ATOM | 3231 | CG  | LEU A 515 | 2.140  | -27.041 | -16.241 | 1.00 | 0.00 | A | C |
| ATOM | 3232 | CD1 | LEU A 515 | 1.194  | -25.833 | -16.309 | 1.00 | 0.00 | A | C |
| ATOM | 3233 | CD2 | LEU A 515 | 3.495  | -26.708 | -15.600 | 1.00 | 0.00 | A | C |
| ATOM | 3234 | C   | LEU A 515 | 1.666  | -30.491 | -14.612 | 1.00 | 0.00 | A | C |
| ATOM | 3235 | O   | LEU A 515 | 1.867  | -30.603 | -13.403 | 1.00 | 0.00 | A | O |
| ATOM | 3236 | N   | PHE A 516 | 0.804  | -31.286 | -15.270 | 1.00 | 0.00 | A | N |
| ATOM | 3237 | CA  | PHE A 516 | -0.006 | -32.242 | -14.570 | 1.00 | 0.00 | A | C |
| ATOM | 3238 | CB  | PHE A 516 | -0.979 | -33.007 | -15.484 | 1.00 | 0.00 | A | C |
| ATOM | 3239 | CG  | PHE A 516 | -2.049 | -32.053 | -15.903 | 1.00 | 0.00 | A | C |
| ATOM | 3240 | CD1 | PHE A 516 | -3.081 | -31.748 | -15.043 | 1.00 | 0.00 | A | C |
| ATOM | 3241 | CE1 | PHE A 516 | -4.075 | -30.874 | -15.417 | 1.00 | 0.00 | A | C |
| ATOM | 3242 | CZ  | PHE A 516 | -4.051 | -30.293 | -16.659 | 1.00 | 0.00 | A | C |
| ATOM | 3243 | CD2 | PHE A 516 | -2.035 | -31.468 | -17.149 | 1.00 | 0.00 | A | C |
| ATOM | 3244 | CE2 | PHE A 516 | -3.029 | -30.592 | -17.527 | 1.00 | 0.00 | A | C |
| ATOM | 3245 | C   | PHE A 516 | 0.869  | -33.235 | -13.872 | 1.00 | 0.00 | A | C |
| ATOM | 3246 | O   | PHE A 516 | 0.592  | -33.623 | -12.736 | 1.00 | 0.00 | A | O |
| ATOM | 3247 | N   | PHE A 517 | 1.953  | -33.678 | -14.529 | 1.00 | 0.00 | A | N |
| ATOM | 3248 | CA  | PHE A 517 | 2.840  | -34.648 | -13.951 | 1.00 | 0.00 | A | C |

|      |      |     |           |        |         |         |      |      |   |   |
|------|------|-----|-----------|--------|---------|---------|------|------|---|---|
| ATOM | 3249 | CB  | PHE A 517 | 3.988  | -35.033 | -14.902 | 1.00 | 0.00 | A | C |
| ATOM | 3250 | CG  | PHE A 517 | 5.017  | -35.759 | -14.105 | 1.00 | 0.00 | A | C |
| ATOM | 3251 | CD1 | PHE A 517 | 4.826  | -37.066 | -13.728 | 1.00 | 0.00 | A | C |
| ATOM | 3252 | CE1 | PHE A 517 | 5.777  | -37.727 | -12.988 | 1.00 | 0.00 | A | C |
| ATOM | 3253 | CZ  | PHE A 517 | 6.930  | -37.088 | -12.607 | 1.00 | 0.00 | A | C |
| ATOM | 3254 | CD2 | PHE A 517 | 6.171  | -35.119 | -13.706 | 1.00 | 0.00 | A | C |
| ATOM | 3255 | CE2 | PHE A 517 | 7.126  | -35.778 | -12.968 | 1.00 | 0.00 | A | C |
| ATOM | 3256 | C   | PHE A 517 | 3.446  | -34.105 | -12.696 | 1.00 | 0.00 | A | C |
| ATOM | 3257 | O   | PHE A 517 | 3.544  | -34.815 | -11.696 | 1.00 | 0.00 | A | O |
| ATOM | 3258 | N   | LEU A 518 | 3.872  | -32.832 | -12.712 | 1.00 | 0.00 | A | N |
| ATOM | 3259 | CA  | LEU A 518 | 4.541  | -32.271 | -11.574 | 1.00 | 0.00 | A | C |
| ATOM | 3260 | CB  | LEU A 518 | 5.092  | -30.857 | -11.817 | 1.00 | 0.00 | A | C |
| ATOM | 3261 | CG  | LEU A 518 | 5.854  | -30.296 | -10.599 | 1.00 | 0.00 | A | C |
| ATOM | 3262 | CD1 | LEU A 518 | 7.108  | -31.130 | -10.291 | 1.00 | 0.00 | A | C |
| ATOM | 3263 | CD2 | LEU A 518 | 6.171  | -28.801 | -10.772 | 1.00 | 0.00 | A | C |
| ATOM | 3264 | C   | LEU A 518 | 3.612  | -32.204 | -10.394 | 1.00 | 0.00 | A | C |
| ATOM | 3265 | O   | LEU A 518 | 4.017  | -32.462 | -9.267  | 1.00 | 0.00 | A | O |
| ATOM | 3266 | N   | GLN A 519 | 2.338  | -31.837 | -10.586 | 1.00 | 0.00 | A | N |
| ATOM | 3267 | CA  | GLN A 519 | 1.466  | -31.721 | -9.448  | 1.00 | 0.00 | A | C |
| ATOM | 3268 | CB  | GLN A 519 | 0.052  | -31.244 | -9.814  | 1.00 | 0.00 | A | C |
| ATOM | 3269 | CG  | GLN A 519 | -0.870 | -31.153 | -8.596  | 1.00 | 0.00 | A | C |
| ATOM | 3270 | CD  | GLN A 519 | -2.303 | -31.126 | -9.100  | 1.00 | 0.00 | A | C |
| ATOM | 3271 | OE1 | GLN A 519 | -2.553 | -31.112 | -10.305 | 1.00 | 0.00 | A | O |
| ATOM | 3272 | NE2 | GLN A 519 | -3.277 | -31.134 | -8.152  | 1.00 | 0.00 | A | N |
| ATOM | 3273 | C   | GLN A 519 | 1.259  | -33.054 | -8.804  | 1.00 | 0.00 | A | C |
| ATOM | 3274 | O   | GLN A 519 | 1.311  | -33.180 | -7.581  | 1.00 | 0.00 | A | O |
| ATOM | 3275 | N   | SER A 520 | 1.014  | -34.086 | -9.627  | 1.00 | 0.00 | A | N |
| ATOM | 3276 | CA  | SER A 520 | 0.682  | -35.380 | -9.109  | 1.00 | 0.00 | A | C |
| ATOM | 3277 | CB  | SER A 520 | 0.313  | -36.386 | -10.213 | 1.00 | 0.00 | A | C |
| ATOM | 3278 | OG  | SER A 520 | 1.407  | -36.564 | -11.097 | 1.00 | 0.00 | A | O |
| ATOM | 3279 | C   | SER A 520 | 1.835  | -35.927 | -8.331  | 1.00 | 0.00 | A | C |
| ATOM | 3280 | O   | SER A 520 | 1.635  | -36.556 | -7.293  | 1.00 | 0.00 | A | O |
| ATOM | 3281 | N   | LEU A 521 | 3.078  | -35.706 | -8.798  | 1.00 | 0.00 | A | N |
| ATOM | 3282 | CA  | LEU A 521 | 4.176  | -36.261 | -8.059  | 1.00 | 0.00 | A | C |
| ATOM | 3283 | CB  | LEU A 521 | 5.543  | -36.222 | -8.782  | 1.00 | 0.00 | A | C |
| ATOM | 3284 | CG  | LEU A 521 | 6.622  | -35.234 | -8.274  | 1.00 | 0.00 | A | C |
| ATOM | 3285 | CD1 | LEU A 521 | 6.189  | -33.777 | -8.327  | 1.00 | 0.00 | A | C |
| ATOM | 3286 | CD2 | LEU A 521 | 7.194  | -35.644 | -6.906  | 1.00 | 0.00 | A | C |

|      |      |     |           |        |         |        |      |      |   |   |
|------|------|-----|-----------|--------|---------|--------|------|------|---|---|
| ATOM | 3287 | C   | LEU A 521 | 4.258  | -35.548 | -6.743 | 1.00 | 0.00 | A | C |
| ATOM | 3288 | O   | LEU A 521 | 4.609  | -36.147 | -5.729 | 1.00 | 0.00 | A | O |
| ATOM | 3289 | N   | PHE A 522 | 3.920  | -34.243 | -6.720 | 1.00 | 0.00 | A | N |
| ATOM | 3290 | CA  | PHE A 522 | 3.991  | -33.478 | -5.504 | 1.00 | 0.00 | A | C |
| ATOM | 3291 | CB  | PHE A 522 | 3.595  | -31.997 | -5.666 | 1.00 | 0.00 | A | C |
| ATOM | 3292 | CG  | PHE A 522 | 4.825  | -31.214 | -5.988 | 1.00 | 0.00 | A | C |
| ATOM | 3293 | CD1 | PHE A 522 | 5.291  | -31.081 | -7.273 | 1.00 | 0.00 | A | C |
| ATOM | 3294 | CE1 | PHE A 522 | 6.433  | -30.352 | -7.528 | 1.00 | 0.00 | A | C |
| ATOM | 3295 | CZ  | PHE A 522 | 7.122  | -29.751 | -6.504 | 1.00 | 0.00 | A | C |
| ATOM | 3296 | CD2 | PHE A 522 | 5.526  | -30.610 | -4.968 | 1.00 | 0.00 | A | C |
| ATOM | 3297 | CE2 | PHE A 522 | 6.664  | -29.882 | -5.216 | 1.00 | 0.00 | A | C |
| ATOM | 3298 | C   | PHE A 522 | 3.099  | -34.093 | -4.479 | 1.00 | 0.00 | A | C |
| ATOM | 3299 | O   | PHE A 522 | 3.466  | -34.191 | -3.310 | 1.00 | 0.00 | A | O |
| ATOM | 3300 | N   | MET A 523 | 1.889  | -34.518 | -4.881 | 1.00 | 0.00 | A | N |
| ATOM | 3301 | CA  | MET A 523 | 1.010  | -35.124 | -3.929 | 1.00 | 0.00 | A | C |
| ATOM | 3302 | CB  | MET A 523 | -0.364 | -35.491 | -4.505 | 1.00 | 0.00 | A | C |
| ATOM | 3303 | CG  | MET A 523 | -1.354 | -35.897 | -3.410 | 1.00 | 0.00 | A | C |
| ATOM | 3304 | SD  | MET A 523 | -2.955 | -36.502 | -4.016 | 1.00 | 0.00 | A | S |
| ATOM | 3305 | CE  | MET A 523 | -2.271 | -38.037 | -4.701 | 1.00 | 0.00 | A | C |
| ATOM | 3306 | C   | MET A 523 | 1.634  | -36.399 | -3.436 | 1.00 | 0.00 | A | C |
| ATOM | 3307 | O   | MET A 523 | 1.524  | -36.741 | -2.261 | 1.00 | 0.00 | A | O |
| ATOM | 3308 | N   | LEU A 524 | 2.315  | -37.145 | -4.324 | 1.00 | 0.00 | A | N |
| ATOM | 3309 | CA  | LEU A 524 | 2.898  | -38.402 | -3.940 | 1.00 | 0.00 | A | C |
| ATOM | 3310 | CB  | LEU A 524 | 3.622  | -39.098 | -5.105 | 1.00 | 0.00 | A | C |
| ATOM | 3311 | CG  | LEU A 524 | 2.709  | -39.463 | -6.290 | 1.00 | 0.00 | A | C |
| ATOM | 3312 | CD1 | LEU A 524 | 3.504  | -40.159 | -7.408 | 1.00 | 0.00 | A | C |
| ATOM | 3313 | CD2 | LEU A 524 | 1.484  | -40.272 | -5.834 | 1.00 | 0.00 | A | C |
| ATOM | 3314 | C   | LEU A 524 | 3.925  | -38.145 | -2.886 | 1.00 | 0.00 | A | C |
| ATOM | 3315 | O   | LEU A 524 | 4.057  | -38.900 | -1.925 | 1.00 | 0.00 | A | O |
| ATOM | 3316 | N   | ALA A 525 | 4.696  | -37.056 | -3.042 | 1.00 | 0.00 | A | N |
| ATOM | 3317 | CA  | ALA A 525 | 5.721  | -36.759 | -2.087 | 1.00 | 0.00 | A | C |
| ATOM | 3318 | CB  | ALA A 525 | 6.510  | -35.488 | -2.441 | 1.00 | 0.00 | A | C |
| ATOM | 3319 | C   | ALA A 525 | 5.078  | -36.526 | -0.759 | 1.00 | 0.00 | A | C |
| ATOM | 3320 | O   | ALA A 525 | 5.590  | -36.958 | 0.272  | 1.00 | 0.00 | A | O |
| ATOM | 3321 | N   | THR A 526 | 3.927  | -35.826 | -0.740 | 1.00 | 0.00 | A | N |
| ATOM | 3322 | CA  | THR A 526 | 3.314  | -35.540 | 0.521  | 1.00 | 0.00 | A | C |
| ATOM | 3323 | CB  | THR A 526 | 2.133  | -34.609 | 0.439  | 1.00 | 0.00 | A | C |
| ATOM | 3324 | OG1 | THR A 526 | 1.052  | -35.211 | -0.252 | 1.00 | 0.00 | A | O |

|      |      |               |        |         |        |      |      |   |   |
|------|------|---------------|--------|---------|--------|------|------|---|---|
| ATOM | 3325 | CG2 THR A 526 | 2.577  | -33.327 | -0.289 | 1.00 | 0.00 | A | C |
| ATOM | 3326 | C THR A 526   | 2.856  | -36.816 | 1.160  | 1.00 | 0.00 | A | C |
| ATOM | 3327 | O THR A 526   | 2.999  | -36.985 | 2.370  | 1.00 | 0.00 | A | O |
| ATOM | 3328 | N VAL A 527   | 2.303  | -37.756 | 0.368  | 1.00 | 0.00 | A | N |
| ATOM | 3329 | CA VAL A 527  | 1.760  | -38.959 | 0.941  | 1.00 | 0.00 | A | C |
| ATOM | 3330 | CB VAL A 527  | 1.051  | -39.859 | -0.037 | 1.00 | 0.00 | A | C |
| ATOM | 3331 | CG1 VAL A 527 | -0.062 | -39.048 | -0.724 | 1.00 | 0.00 | A | C |
| ATOM | 3332 | CG2 VAL A 527 | 2.066  | -40.516 | -0.982 | 1.00 | 0.00 | A | C |
| ATOM | 3333 | C VAL A 527   | 2.843  | -39.753 | 1.602  | 1.00 | 0.00 | A | C |
| ATOM | 3334 | O VAL A 527   | 2.644  | -40.291 | 2.691  | 1.00 | 0.00 | A | O |
| ATOM | 3335 | N VAL A 528   | 4.027  | -39.856 | 0.972  | 1.00 | 0.00 | A | N |
| ATOM | 3336 | CA VAL A 528  | 5.066  | -40.622 | 1.593  | 1.00 | 0.00 | A | C |
| ATOM | 3337 | CB VAL A 528  | 6.324  | -40.715 | 0.771  | 1.00 | 0.00 | A | C |
| ATOM | 3338 | CG1 VAL A 528 | 5.984  | -41.406 | -0.560 | 1.00 | 0.00 | A | C |
| ATOM | 3339 | CG2 VAL A 528 | 6.944  | -39.319 | 0.614  | 1.00 | 0.00 | A | C |
| ATOM | 3340 | C VAL A 528   | 5.390  | -39.951 | 2.885  | 1.00 | 0.00 | A | C |
| ATOM | 3341 | O VAL A 528   | 5.621  | -40.605 | 3.899  | 1.00 | 0.00 | A | O |
| ATOM | 3342 | N LEU A 529   | 5.399  | -38.607 | 2.867  | 1.00 | 0.00 | A | N |
| ATOM | 3343 | CA LEU A 529  | 5.709  | -37.811 | 4.014  | 1.00 | 0.00 | A | C |
| ATOM | 3344 | CB LEU A 529  | 5.792  | -36.307 | 3.699  | 1.00 | 0.00 | A | C |
| ATOM | 3345 | CG LEU A 529  | 6.928  | -35.935 | 2.726  | 1.00 | 0.00 | A | C |
| ATOM | 3346 | CD1 LEU A 529 | 6.980  | -34.418 | 2.478  | 1.00 | 0.00 | A | C |
| ATOM | 3347 | CD2 LEU A 529 | 8.275  | -36.508 | 3.195  | 1.00 | 0.00 | A | C |
| ATOM | 3348 | C LEU A 529   | 4.648  | -38.008 | 5.046  | 1.00 | 0.00 | A | C |
| ATOM | 3349 | O LEU A 529   | 4.943  | -37.930 | 6.228  | 1.00 | 0.00 | A | O |
| ATOM | 3350 | N TYR A 530   | 3.384  | -38.228 | 4.646  | 1.00 | 0.00 | A | N |
| ATOM | 3351 | CA TYR A 530  | 2.268  | -38.409 | 5.540  | 1.00 | 0.00 | A | C |
| ATOM | 3352 | CB TYR A 530  | 0.981  | -38.591 | 4.712  | 1.00 | 0.00 | A | C |
| ATOM | 3353 | CG TYR A 530  | -0.260 | -38.419 | 5.520  | 1.00 | 0.00 | A | C |
| ATOM | 3354 | CD1 TYR A 530 | -0.790 | -37.162 | 5.701  | 1.00 | 0.00 | A | C |
| ATOM | 3355 | CE1 TYR A 530 | -1.942 | -36.979 | 6.430  | 1.00 | 0.00 | A | C |
| ATOM | 3356 | CZ TYR A 530  | -2.576 | -38.063 | 6.982  | 1.00 | 0.00 | A | C |
| ATOM | 3357 | OH TYR A 530  | -3.758 | -37.879 | 7.731  | 1.00 | 0.00 | A | O |
| ATOM | 3358 | CD2 TYR A 530 | -0.908 | -39.500 | 6.070  | 1.00 | 0.00 | A | C |
| ATOM | 3359 | CE2 TYR A 530 | -2.060 | -39.324 | 6.800  | 1.00 | 0.00 | A | C |
| ATOM | 3360 | C TYR A 530   | 2.521  | -39.664 | 6.318  | 1.00 | 0.00 | A | C |
| ATOM | 3361 | O TYR A 530   | 2.301  | -39.724 | 7.528  | 1.00 | 0.00 | A | O |
| ATOM | 3362 | N PHE A 531   | 2.998  | -40.714 | 5.627  | 1.00 | 0.00 | A | N |

|      |      |     |     |   |     |        |         |        |      |      |   |   |
|------|------|-----|-----|---|-----|--------|---------|--------|------|------|---|---|
| ATOM | 3363 | CA  | PHE | A | 531 | 3.307  | -41.944 | 6.289  | 1.00 | 0.00 | A | C |
| ATOM | 3364 | CB  | PHE | A | 531 | 3.725  | -43.079 | 5.341  | 1.00 | 0.00 | A | C |
| ATOM | 3365 | CG  | PHE | A | 531 | 2.465  | -43.563 | 4.724  | 1.00 | 0.00 | A | C |
| ATOM | 3366 | CD1 | PHE | A | 531 | 1.585  | -44.295 | 5.486  | 1.00 | 0.00 | A | C |
| ATOM | 3367 | CE1 | PHE | A | 531 | 0.411  | -44.760 | 4.947  | 1.00 | 0.00 | A | C |
| ATOM | 3368 | CZ  | PHE | A | 531 | 0.112  | -44.497 | 3.633  | 1.00 | 0.00 | A | C |
| ATOM | 3369 | CD2 | PHE | A | 531 | 2.165  | -43.306 | 3.406  | 1.00 | 0.00 | A | C |
| ATOM | 3370 | CE2 | PHE | A | 531 | 0.989  | -43.770 | 2.864  | 1.00 | 0.00 | A | C |
| ATOM | 3371 | C   | PHE | A | 531 | 4.422  | -41.693 | 7.246  | 1.00 | 0.00 | A | C |
| ATOM | 3372 | O   | PHE | A | 531 | 4.411  | -42.206 | 8.364  | 1.00 | 0.00 | A | O |
| ATOM | 3373 | N   | SER | A | 532 | 5.429  | -40.907 | 6.821  | 1.00 | 0.00 | A | N |
| ATOM | 3374 | CA  | SER | A | 532 | 6.513  | -40.606 | 7.707  | 1.00 | 0.00 | A | C |
| ATOM | 3375 | CB  | SER | A | 532 | 7.727  | -39.942 | 7.023  | 1.00 | 0.00 | A | C |
| ATOM | 3376 | OG  | SER | A | 532 | 7.386  | -38.683 | 6.464  | 1.00 | 0.00 | A | O |
| ATOM | 3377 | C   | SER | A | 532 | 5.978  | -39.706 | 8.778  | 1.00 | 0.00 | A | C |
| ATOM | 3378 | O   | SER | A | 532 | 6.584  | -39.549 | 9.834  | 1.00 | 0.00 | A | O |
| ATOM | 3379 | N   | HSD | A | 533 | 4.810  | -39.103 | 8.491  | 1.00 | 0.00 | A | N |
| ATOM | 3380 | CA  | HSD | A | 533 | 4.028  | -38.203 | 9.285  | 1.00 | 0.00 | A | C |
| ATOM | 3381 | CB  | HSD | A | 533 | 3.379  | -38.864 | 10.518 | 1.00 | 0.00 | A | C |
| ATOM | 3382 | ND1 | HSD | A | 533 | 5.047  | -38.640 | 12.419 | 1.00 | 0.00 | A | N |
| ATOM | 3383 | CG  | HSD | A | 533 | 4.368  | -39.412 | 11.502 | 1.00 | 0.00 | A | C |
| ATOM | 3384 | CE1 | HSD | A | 533 | 5.850  | -39.482 | 13.119 | 1.00 | 0.00 | A | C |
| ATOM | 3385 | NE2 | HSD | A | 533 | 5.732  | -40.736 | 12.718 | 1.00 | 0.00 | A | N |
| ATOM | 3386 | CD2 | HSD | A | 533 | 4.797  | -40.689 | 11.697 | 1.00 | 0.00 | A | C |
| ATOM | 3387 | C   | HSD | A | 533 | 4.794  | -36.990 | 9.724  | 1.00 | 0.00 | A | C |
| ATOM | 3388 | O   | HSD | A | 533 | 4.550  | -36.479 | 10.808 | 1.00 | 0.00 | A | O |
| ATOM | 3389 | N   | LEU | A | 534 | 5.717  | -36.456 | 8.901  | 1.00 | 0.00 | A | N |
| ATOM | 3390 | CA  | LEU | A | 534 | 6.399  | -35.254 | 9.312  | 1.00 | 0.00 | A | C |
| ATOM | 3391 | CB  | LEU | A | 534 | 7.722  | -35.009 | 8.569  | 1.00 | 0.00 | A | C |
| ATOM | 3392 | CG  | LEU | A | 534 | 8.759  | -36.125 | 8.806  | 1.00 | 0.00 | A | C |
| ATOM | 3393 | CD1 | LEU | A | 534 | 10.082 | -35.828 | 8.085  | 1.00 | 0.00 | A | C |
| ATOM | 3394 | CD2 | LEU | A | 534 | 8.942  | -36.409 | 10.305 | 1.00 | 0.00 | A | C |
| ATOM | 3395 | C   | LEU | A | 534 | 5.485  | -34.106 | 9.018  | 1.00 | 0.00 | A | C |
| ATOM | 3396 | O   | LEU | A | 534 | 4.764  | -34.129 | 8.028  | 1.00 | 0.00 | A | O |
| ATOM | 3397 | N   | LYS | A | 535 | 5.507  | -33.062 | 9.867  | 1.00 | 0.00 | A | N |
| ATOM | 3398 | CA  | LYS | A | 535 | 4.642  | -31.916 | 9.757  | 1.00 | 0.00 | A | C |
| ATOM | 3399 | CB  | LYS | A | 535 | 4.826  | -30.936 | 10.924 | 1.00 | 0.00 | A | C |
| ATOM | 3400 | CG  | LYS | A | 535 | 4.331  | -31.482 | 12.264 | 1.00 | 0.00 | A | C |

|      |      |     |     |   |     |        |         |        |      |      |   |   |
|------|------|-----|-----|---|-----|--------|---------|--------|------|------|---|---|
| ATOM | 3401 | CD  | LYS | A | 535 | 4.832  | -30.696 | 13.476 | 1.00 | 0.00 | A | C |
| ATOM | 3402 | CE  | LYS | A | 535 | 4.569  | -29.192 | 13.389 | 1.00 | 0.00 | A | C |
| ATOM | 3403 | NZ  | LYS | A | 535 | 5.529  | -28.564 | 12.452 | 1.00 | 0.00 | A | N |
| ATOM | 3404 | C   | LYS | A | 535 | 4.920  | -31.168 | 8.488  | 1.00 | 0.00 | A | C |
| ATOM | 3405 | O   | LYS | A | 535 | 4.007  | -30.626 | 7.867  | 1.00 | 0.00 | A | O |
| ATOM | 3406 | N   | GLU | A | 536 | 6.192  | -31.135 | 8.059  | 1.00 | 0.00 | A | N |
| ATOM | 3407 | CA  | GLU | A | 536 | 6.597  | -30.371 | 6.911  | 1.00 | 0.00 | A | C |
| ATOM | 3408 | CB  | GLU | A | 536 | 8.107  | -30.393 | 6.619  | 1.00 | 0.00 | A | C |
| ATOM | 3409 | CG  | GLU | A | 536 | 8.920  | -29.453 | 7.507  | 1.00 | 0.00 | A | C |
| ATOM | 3410 | CD  | GLU | A | 536 | 10.259 | -29.236 | 6.817  | 1.00 | 0.00 | A | C |
| ATOM | 3411 | OE1 | GLU | A | 536 | 10.695 | -30.158 | 6.076  | 1.00 | 0.00 | A | O |
| ATOM | 3412 | OE2 | GLU | A | 536 | 10.858 | -28.147 | 7.016  | 1.00 | 0.00 | A | O |
| ATOM | 3413 | C   | GLU | A | 536 | 5.904  | -30.861 | 5.684  | 1.00 | 0.00 | A | C |
| ATOM | 3414 | O   | GLU | A | 536 | 5.835  | -30.149 | 4.683  | 1.00 | 0.00 | A | O |
| ATOM | 3415 | N   | TYR | A | 537 | 5.374  | -32.095 | 5.718  | 1.00 | 0.00 | A | N |
| ATOM | 3416 | CA  | TYR | A | 537 | 4.815  | -32.703 | 4.544  | 1.00 | 0.00 | A | C |
| ATOM | 3417 | CB  | TYR | A | 537 | 4.190  | -34.090 | 4.799  | 1.00 | 0.00 | A | C |
| ATOM | 3418 | CG  | TYR | A | 537 | 2.785  | -33.965 | 5.287  | 1.00 | 0.00 | A | C |
| ATOM | 3419 | CD1 | TYR | A | 537 | 2.486  | -33.722 | 6.605  | 1.00 | 0.00 | A | C |
| ATOM | 3420 | CE1 | TYR | A | 537 | 1.188  | -33.615 | 7.043  | 1.00 | 0.00 | A | C |
| ATOM | 3421 | CZ  | TYR | A | 537 | 0.162  | -33.748 | 6.142  | 1.00 | 0.00 | A | C |
| ATOM | 3422 | OH  | TYR | A | 537 | -1.177 | -33.643 | 6.575  | 1.00 | 0.00 | A | O |
| ATOM | 3423 | CD2 | TYR | A | 537 | 1.745  | -34.088 | 4.396  | 1.00 | 0.00 | A | C |
| ATOM | 3424 | CE2 | TYR | A | 537 | 0.444  | -33.985 | 4.819  | 1.00 | 0.00 | A | C |
| ATOM | 3425 | C   | TYR | A | 537 | 3.737  | -31.815 | 3.999  | 1.00 | 0.00 | A | C |
| ATOM | 3426 | O   | TYR | A | 537 | 3.581  | -31.697 | 2.785  | 1.00 | 0.00 | A | O |
| ATOM | 3427 | N   | VAL | A | 538 | 2.977  | -31.140 | 4.879  | 1.00 | 0.00 | A | N |
| ATOM | 3428 | CA  | VAL | A | 538 | 1.851  | -30.359 | 4.446  | 1.00 | 0.00 | A | C |
| ATOM | 3429 | CB  | VAL | A | 538 | 1.190  | -29.614 | 5.567  | 1.00 | 0.00 | A | C |
| ATOM | 3430 | CG1 | VAL | A | 538 | 2.163  | -28.548 | 6.096  | 1.00 | 0.00 | A | C |
| ATOM | 3431 | CG2 | VAL | A | 538 | -0.151 | -29.054 | 5.057  | 1.00 | 0.00 | A | C |
| ATOM | 3432 | C   | VAL | A | 538 | 2.252  | -29.365 | 3.400  | 1.00 | 0.00 | A | C |
| ATOM | 3433 | O   | VAL | A | 538 | 1.556  | -29.247 | 2.393  | 1.00 | 0.00 | A | O |
| ATOM | 3434 | N   | ALA | A | 539 | 3.405  | -28.683 | 3.560  | 1.00 | 0.00 | A | N |
| ATOM | 3435 | CA  | ALA | A | 539 | 3.782  | -27.630 | 2.653  | 1.00 | 0.00 | A | C |
| ATOM | 3436 | CB  | ALA | A | 539 | 5.187  | -27.063 | 2.931  | 1.00 | 0.00 | A | C |
| ATOM | 3437 | C   | ALA | A | 539 | 3.796  | -28.181 | 1.261  | 1.00 | 0.00 | A | C |
| ATOM | 3438 | O   | ALA | A | 539 | 3.375  | -27.508 | 0.321  | 1.00 | 0.00 | A | O |

|      |      |     |           |        |         |        |      |      |   |   |
|------|------|-----|-----------|--------|---------|--------|------|------|---|---|
| ATOM | 3439 | N   | SER A 540 | 4.265  | -29.428 | 1.095  | 1.00 | 0.00 | A | N |
| ATOM | 3440 | CA  | SER A 540 | 4.298  | -30.039 | -0.204 | 1.00 | 0.00 | A | C |
| ATOM | 3441 | CB  | SER A 540 | 4.926  | -31.444 | -0.179 | 1.00 | 0.00 | A | C |
| ATOM | 3442 | OG  | SER A 540 | 6.288  | -31.360 | 0.209  | 1.00 | 0.00 | A | O |
| ATOM | 3443 | C   | SER A 540 | 2.894  | -30.189 | -0.714 | 1.00 | 0.00 | A | C |
| ATOM | 3444 | O   | SER A 540 | 2.625  | -29.968 | -1.895 | 1.00 | 0.00 | A | O |
| ATOM | 3445 | N   | MET A 541 | 1.956  | -30.574 | 0.171  | 1.00 | 0.00 | A | N |
| ATOM | 3446 | CA  | MET A 541 | 0.587  | -30.753 | -0.225 | 1.00 | 0.00 | A | C |
| ATOM | 3447 | CB  | MET A 541 | -0.322 | -31.278 | 0.899  | 1.00 | 0.00 | A | C |
| ATOM | 3448 | CG  | MET A 541 | -0.068 | -32.736 | 1.275  | 1.00 | 0.00 | A | C |
| ATOM | 3449 | SD  | MET A 541 | -1.334 | -33.422 | 2.382  | 1.00 | 0.00 | A | S |
| ATOM | 3450 | CE  | MET A 541 | -2.666 | -33.320 | 1.148  | 1.00 | 0.00 | A | C |
| ATOM | 3451 | C   | MET A 541 | 0.029  | -29.430 | -0.644 | 1.00 | 0.00 | A | C |
| ATOM | 3452 | O   | MET A 541 | -0.739 | -29.346 | -1.602 | 1.00 | 0.00 | A | O |
| ATOM | 3453 | N   | VAL A 542 | 0.422  | -28.355 | 0.063  | 1.00 | 0.00 | A | N |
| ATOM | 3454 | CA  | VAL A 542 | -0.094 | -27.046 | -0.218 | 1.00 | 0.00 | A | C |
| ATOM | 3455 | CB  | VAL A 542 | 0.547  | -25.975 | 0.615  | 1.00 | 0.00 | A | C |
| ATOM | 3456 | CG1 | VAL A 542 | 0.047  | -24.610 | 0.115  | 1.00 | 0.00 | A | C |
| ATOM | 3457 | CG2 | VAL A 542 | 0.241  | -26.240 | 2.098  | 1.00 | 0.00 | A | C |
| ATOM | 3458 | C   | VAL A 542 | 0.218  | -26.731 | -1.641 | 1.00 | 0.00 | A | C |
| ATOM | 3459 | O   | VAL A 542 | -0.620 | -26.187 | -2.360 | 1.00 | 0.00 | A | O |
| ATOM | 3460 | N   | PHE A 543 | 1.436  | -27.073 | -2.095 | 1.00 | 0.00 | A | N |
| ATOM | 3461 | CA  | PHE A 543 | 1.762  | -26.836 | -3.472 | 1.00 | 0.00 | A | C |
| ATOM | 3462 | CB  | PHE A 543 | 3.152  | -27.344 | -3.899 | 1.00 | 0.00 | A | C |
| ATOM | 3463 | CG  | PHE A 543 | 4.161  | -26.273 | -3.712 | 1.00 | 0.00 | A | C |
| ATOM | 3464 | CD1 | PHE A 543 | 4.695  | -25.983 | -2.479 | 1.00 | 0.00 | A | C |
| ATOM | 3465 | CE1 | PHE A 543 | 5.631  | -24.983 | -2.354 | 1.00 | 0.00 | A | C |
| ATOM | 3466 | CZ  | PHE A 543 | 6.044  | -24.274 | -3.458 | 1.00 | 0.00 | A | C |
| ATOM | 3467 | CD2 | PHE A 543 | 4.585  | -25.563 | -4.812 | 1.00 | 0.00 | A | C |
| ATOM | 3468 | CE2 | PHE A 543 | 5.520  | -24.564 | -4.693 | 1.00 | 0.00 | A | C |
| ATOM | 3469 | C   | PHE A 543 | 0.809  | -27.609 | -4.318 | 1.00 | 0.00 | A | C |
| ATOM | 3470 | O   | PHE A 543 | 0.314  | -27.109 | -5.328 | 1.00 | 0.00 | A | O |
| ATOM | 3471 | N   | SER A 544 | 0.531  | -28.857 | -3.919 | 1.00 | 0.00 | A | N |
| ATOM | 3472 | CA  | SER A 544 | -0.279 | -29.737 | -4.711 | 1.00 | 0.00 | A | C |
| ATOM | 3473 | CB  | SER A 544 | -0.432 | -31.127 | -4.061 | 1.00 | 0.00 | A | C |
| ATOM | 3474 | OG  | SER A 544 | -1.243 | -31.969 | -4.868 | 1.00 | 0.00 | A | O |
| ATOM | 3475 | C   | SER A 544 | -1.656 | -29.179 | -4.911 | 1.00 | 0.00 | A | C |
| ATOM | 3476 | O   | SER A 544 | -2.181 | -29.228 | -6.022 | 1.00 | 0.00 | A | O |



|      |      |     |     |   |     |         |         |         |      |      |   |   |
|------|------|-----|-----|---|-----|---------|---------|---------|------|------|---|---|
| ATOM | 3477 | N   | LEU | A | 545 | -2.285  | -28.642 | -3.851  | 1.00 | 0.00 | A | N |
| ATOM | 3478 | CA  | LEU | A | 545 | -3.645  | -28.186 | -3.963  | 1.00 | 0.00 | A | C |
| ATOM | 3479 | CB  | LEU | A | 545 | -4.232  | -27.703 | -2.630  | 1.00 | 0.00 | A | C |
| ATOM | 3480 | CG  | LEU | A | 545 | -5.686  | -27.218 | -2.774  | 1.00 | 0.00 | A | C |
| ATOM | 3481 | CD1 | LEU | A | 545 | -6.629  | -28.357 | -3.184  | 1.00 | 0.00 | A | C |
| ATOM | 3482 | CD2 | LEU | A | 545 | -6.156  | -26.492 | -1.508  | 1.00 | 0.00 | A | C |
| ATOM | 3483 | C   | LEU | A | 545 | -3.774  | -27.037 | -4.915  | 1.00 | 0.00 | A | C |
| ATOM | 3484 | O   | LEU | A | 545 | -4.684  | -27.023 | -5.743  | 1.00 | 0.00 | A | O |
| ATOM | 3485 | N   | ALA | A | 546 | -2.891  | -26.026 | -4.786  | 1.00 | 0.00 | A | N |
| ATOM | 3486 | CA  | ALA | A | 546 | -2.911  | -24.836 | -5.597  | 1.00 | 0.00 | A | C |
| ATOM | 3487 | CB  | ALA | A | 546 | -1.904  | -23.779 | -5.117  | 1.00 | 0.00 | A | C |
| ATOM | 3488 | C   | ALA | A | 546 | -2.568  | -25.161 | -7.017  | 1.00 | 0.00 | A | C |
| ATOM | 3489 | O   | ALA | A | 546 | -3.195  | -24.659 | -7.948  | 1.00 | 0.00 | A | O |
| ATOM | 3490 | N   | LEU | A | 547 | -1.554  | -26.022 | -7.213  | 1.00 | 0.00 | A | N |
| ATOM | 3491 | CA  | LEU | A | 547 | -1.086  | -26.332 | -8.530  | 1.00 | 0.00 | A | C |
| ATOM | 3492 | CB  | LEU | A | 547 | 0.093   | -27.322 | -8.533  | 1.00 | 0.00 | A | C |
| ATOM | 3493 | CG  | LEU | A | 547 | 1.390   | -26.770 | -7.908  | 1.00 | 0.00 | A | C |
| ATOM | 3494 | CD1 | LEU | A | 547 | 2.524   | -27.806 | -7.981  | 1.00 | 0.00 | A | C |
| ATOM | 3495 | CD2 | LEU | A | 547 | 1.780   | -25.421 | -8.534  | 1.00 | 0.00 | A | C |
| ATOM | 3496 | C   | LEU | A | 547 | -2.194  | -26.978 | -9.296  | 1.00 | 0.00 | A | C |
| ATOM | 3497 | O   | LEU | A | 547 | -2.399  | -26.687 | -10.474 | 1.00 | 0.00 | A | O |
| ATOM | 3498 | N   | GLY | A | 548 | -2.942  | -27.880 | -8.640  | 1.00 | 0.00 | A | N |
| ATOM | 3499 | CA  | GLY | A | 548 | -3.994  | -28.578 | -9.318  | 1.00 | 0.00 | A | C |
| ATOM | 3500 | C   | GLY | A | 548 | -5.027  | -27.600 | -9.781  | 1.00 | 0.00 | A | C |
| ATOM | 3501 | O   | GLY | A | 548 | -5.532  | -27.705 | -10.897 | 1.00 | 0.00 | A | O |
| ATOM | 3502 | N   | TRP | A | 549 | -5.375  | -26.613 | -8.933  | 1.00 | 0.00 | A | N |
| ATOM | 3503 | CA  | TRP | A | 549 | -6.384  | -25.672 | -9.323  | 1.00 | 0.00 | A | C |
| ATOM | 3504 | CB  | TRP | A | 549 | -6.763  | -24.656 | -8.232  | 1.00 | 0.00 | A | C |
| ATOM | 3505 | CG  | TRP | A | 549 | -7.700  | -25.223 | -7.199  | 1.00 | 0.00 | A | C |
| ATOM | 3506 | CD1 | TRP | A | 549 | -7.502  | -25.553 | -5.888  | 1.00 | 0.00 | A | C |
| ATOM | 3507 | NE1 | TRP | A | 549 | -8.662  | -26.061 | -5.354  | 1.00 | 0.00 | A | N |
| ATOM | 3508 | CE2 | TRP | A | 549 | -9.632  | -26.067 | -6.336  | 1.00 | 0.00 | A | C |
| ATOM | 3509 | CD2 | TRP | A | 549 | -9.064  | -25.551 | -7.501  | 1.00 | 0.00 | A | C |
| ATOM | 3510 | CE3 | TRP | A | 549 | -9.779  | -25.433 | -8.657  | 1.00 | 0.00 | A | C |
| ATOM | 3511 | CZ3 | TRP | A | 549 | -11.093 | -25.842 | -8.629  | 1.00 | 0.00 | A | C |
| ATOM | 3512 | CZ2 | TRP | A | 549 | -10.936 | -26.475 | -6.312  | 1.00 | 0.00 | A | C |
| ATOM | 3513 | CH2 | TRP | A | 549 | -11.660 | -26.351 | -7.479  | 1.00 | 0.00 | A | C |
| ATOM | 3514 | C   | TRP | A | 549 | -5.932  | -24.911 | -10.527 | 1.00 | 0.00 | A | C |

|      |      |     |           |         |         |         |      |      |   |   |
|------|------|-----|-----------|---------|---------|---------|------|------|---|---|
| ATOM | 3515 | O   | TRP A 549 | -6.700  | -24.726 | -11.468 | 1.00 | 0.00 | A | O |
| ATOM | 3516 | N   | THR A 550 | -4.666  | -24.467 | -10.542 | 1.00 | 0.00 | A | N |
| ATOM | 3517 | CA  | THR A 550 | -4.194  | -23.686 | -11.648 | 1.00 | 0.00 | A | C |
| ATOM | 3518 | CB  | THR A 550 | -2.772  | -23.237 | -11.478 | 1.00 | 0.00 | A | C |
| ATOM | 3519 | OG1 | THR A 550 | -1.890  | -24.349 | -11.490 | 1.00 | 0.00 | A | O |
| ATOM | 3520 | CG2 | THR A 550 | -2.668  | -22.504 | -10.130 | 1.00 | 0.00 | A | C |
| ATOM | 3521 | C   | THR A 550 | -4.286  | -24.533 | -12.882 | 1.00 | 0.00 | A | C |
| ATOM | 3522 | O   | THR A 550 | -4.612  | -24.040 | -13.960 | 1.00 | 0.00 | A | O |
| ATOM | 3523 | N   | ASN A 551 | -4.004  | -25.840 | -12.741 | 1.00 | 0.00 | A | N |
| ATOM | 3524 | CA  | ASN A 551 | -4.024  | -26.785 | -13.826 | 1.00 | 0.00 | A | C |
| ATOM | 3525 | CB  | ASN A 551 | -3.602  | -28.202 | -13.400 | 1.00 | 0.00 | A | C |
| ATOM | 3526 | CG  | ASN A 551 | -2.125  | -28.201 | -13.040 | 1.00 | 0.00 | A | C |
| ATOM | 3527 | OD1 | ASN A 551 | -1.385  | -27.277 | -13.376 | 1.00 | 0.00 | A | O |
| ATOM | 3528 | ND2 | ASN A 551 | -1.675  | -29.278 | -12.341 | 1.00 | 0.00 | A | N |
| ATOM | 3529 | C   | ASN A 551 | -5.420  | -26.906 | -14.372 | 1.00 | 0.00 | A | C |
| ATOM | 3530 | O   | ASN A 551 | -5.608  | -27.099 | -15.573 | 1.00 | 0.00 | A | O |
| ATOM | 3531 | N   | MET A 552 | -6.436  | -26.764 | -13.503 | 1.00 | 0.00 | A | N |
| ATOM | 3532 | CA  | MET A 552 | -7.817  | -26.997 | -13.839 | 1.00 | 0.00 | A | C |
| ATOM | 3533 | CB  | MET A 552 | -8.767  | -26.782 | -12.649 | 1.00 | 0.00 | A | C |
| ATOM | 3534 | CG  | MET A 552 | -10.170 | -27.335 | -12.908 | 1.00 | 0.00 | A | C |
| ATOM | 3535 | SD  | MET A 552 | -11.349 | -27.119 | -11.544 | 1.00 | 0.00 | A | S |
| ATOM | 3536 | CE  | MET A 552 | -11.773 | -25.403 | -11.943 | 1.00 | 0.00 | A | C |
| ATOM | 3537 | C   | MET A 552 | -8.258  | -26.073 | -14.935 | 1.00 | 0.00 | A | C |
| ATOM | 3538 | O   | MET A 552 | -9.123  | -26.416 | -15.740 | 1.00 | 0.00 | A | O |
| ATOM | 3539 | N   | LEU A 553 | -7.657  | -24.875 | -15.001 | 1.00 | 0.00 | A | N |
| ATOM | 3540 | CA  | LEU A 553 | -8.013  | -23.816 | -15.910 | 1.00 | 0.00 | A | C |
| ATOM | 3541 | CB  | LEU A 553 | -7.021  | -22.648 | -15.837 | 1.00 | 0.00 | A | C |
| ATOM | 3542 | CG  | LEU A 553 | -6.712  | -22.201 | -14.402 | 1.00 | 0.00 | A | C |
| ATOM | 3543 | CD1 | LEU A 553 | -5.950  | -20.865 | -14.387 | 1.00 | 0.00 | A | C |
| ATOM | 3544 | CD2 | LEU A 553 | -7.964  | -22.231 | -13.519 | 1.00 | 0.00 | A | C |
| ATOM | 3545 | C   | LEU A 553 | -7.898  | -24.316 | -17.326 | 1.00 | 0.00 | A | C |
| ATOM | 3546 | O   | LEU A 553 | -8.571  | -23.824 | -18.229 | 1.00 | 0.00 | A | O |
| ATOM | 3547 | N   | TYR A 554 | -7.003  | -25.294 | -17.536 | 1.00 | 0.00 | A | N |
| ATOM | 3548 | CA  | TYR A 554 | -6.637  | -25.896 | -18.792 | 1.00 | 0.00 | A | C |
| ATOM | 3549 | CB  | TYR A 554 | -5.546  | -26.960 | -18.548 | 1.00 | 0.00 | A | C |
| ATOM | 3550 | CG  | TYR A 554 | -5.643  | -28.112 | -19.489 | 1.00 | 0.00 | A | C |
| ATOM | 3551 | CD1 | TYR A 554 | -5.338  | -28.018 | -20.827 | 1.00 | 0.00 | A | C |
| ATOM | 3552 | CE1 | TYR A 554 | -5.437  | -29.131 | -21.637 | 1.00 | 0.00 | A | C |

|      |      |     |     |   |     |         |         |         |      |      |   |   |
|------|------|-----|-----|---|-----|---------|---------|---------|------|------|---|---|
| ATOM | 3553 | CZ  | TYR | A | 554 | -5.829  | -30.342 | -21.117 | 1.00 | 0.00 | A | C |
| ATOM | 3554 | OH  | TYR | A | 554 | -5.929  | -31.481 | -21.944 | 1.00 | 0.00 | A | O |
| ATOM | 3555 | CD2 | TYR | A | 554 | -6.023  | -29.331 | -18.980 | 1.00 | 0.00 | A | C |
| ATOM | 3556 | CE2 | TYR | A | 554 | -6.122  | -30.443 | -19.781 | 1.00 | 0.00 | A | C |
| ATOM | 3557 | C   | TYR | A | 554 | -7.803  | -26.510 | -19.522 | 1.00 | 0.00 | A | C |
| ATOM | 3558 | O   | TYR | A | 554 | -7.890  | -26.401 | -20.744 | 1.00 | 0.00 | A | O |
| ATOM | 3559 | N   | TYR | A | 555 | -8.749  | -27.132 | -18.803 | 1.00 | 0.00 | A | N |
| ATOM | 3560 | CA  | TYR | A | 555 | -9.848  | -27.834 | -19.412 | 1.00 | 0.00 | A | C |
| ATOM | 3561 | CB  | TYR | A | 555 | -10.839 | -28.470 | -18.415 | 1.00 | 0.00 | A | C |
| ATOM | 3562 | CG  | TYR | A | 555 | -10.294 | -29.784 | -17.966 | 1.00 | 0.00 | A | C |
| ATOM | 3563 | CD1 | TYR | A | 555 | -10.490 | -30.897 | -18.753 | 1.00 | 0.00 | A | C |
| ATOM | 3564 | CE1 | TYR | A | 555 | -10.011 | -32.126 | -18.375 | 1.00 | 0.00 | A | C |
| ATOM | 3565 | CZ  | TYR | A | 555 | -9.324  | -32.257 | -17.193 | 1.00 | 0.00 | A | C |
| ATOM | 3566 | OH  | TYR | A | 555 | -8.832  | -33.521 | -16.806 | 1.00 | 0.00 | A | O |
| ATOM | 3567 | CD2 | TYR | A | 555 | -9.607  | -29.923 | -16.781 | 1.00 | 0.00 | A | C |
| ATOM | 3568 | CE2 | TYR | A | 555 | -9.122  | -31.154 | -16.396 | 1.00 | 0.00 | A | C |
| ATOM | 3569 | C   | TYR | A | 555 | -10.620 | -26.936 | -20.317 | 1.00 | 0.00 | A | C |
| ATOM | 3570 | O   | TYR | A | 555 | -11.245 | -27.402 | -21.265 | 1.00 | 0.00 | A | O |
| ATOM | 3571 | N   | THR | A | 556 | -10.636 | -25.631 | -20.040 | 1.00 | 0.00 | A | N |
| ATOM | 3572 | CA  | THR | A | 556 | -11.411 | -24.714 | -20.818 | 1.00 | 0.00 | A | C |
| ATOM | 3573 | CB  | THR | A | 556 | -11.362 | -23.328 | -20.267 | 1.00 | 0.00 | A | C |
| ATOM | 3574 | OG1 | THR | A | 556 | -11.671 | -23.352 | -18.882 | 1.00 | 0.00 | A | O |
| ATOM | 3575 | CG2 | THR | A | 556 | -12.456 | -22.522 | -20.980 | 1.00 | 0.00 | A | C |
| ATOM | 3576 | C   | THR | A | 556 | -10.909 | -24.722 | -22.238 | 1.00 | 0.00 | A | C |
| ATOM | 3577 | O   | THR | A | 556 | -11.616 | -24.308 | -23.152 | 1.00 | 0.00 | A | O |
| ATOM | 3578 | N   | ARG | A | 557 | -9.660  | -25.170 | -22.471 | 1.00 | 0.00 | A | N |
| ATOM | 3579 | CA  | ARG | A | 557 | -9.057  | -25.154 | -23.780 | 1.00 | 0.00 | A | C |
| ATOM | 3580 | CB  | ARG | A | 557 | -7.656  | -25.793 | -23.794 | 1.00 | 0.00 | A | C |
| ATOM | 3581 | CG  | ARG | A | 557 | -6.635  | -24.992 | -22.982 | 1.00 | 0.00 | A | C |
| ATOM | 3582 | CD  | ARG | A | 557 | -5.281  | -25.683 | -22.792 | 1.00 | 0.00 | A | C |
| ATOM | 3583 | NE  | ARG | A | 557 | -4.515  | -25.572 | -24.064 | 1.00 | 0.00 | A | N |
| ATOM | 3584 | CZ  | ARG | A | 557 | -3.151  | -25.543 | -24.052 | 1.00 | 0.00 | A | C |
| ATOM | 3585 | NH1 | ARG | A | 557 | -2.458  | -25.577 | -22.874 | 1.00 | 0.00 | A | N |
| ATOM | 3586 | NH2 | ARG | A | 557 | -2.470  | -25.476 | -25.234 | 1.00 | 0.00 | A | N |
| ATOM | 3587 | C   | ARG | A | 557 | -9.908  | -25.846 | -24.808 | 1.00 | 0.00 | A | C |
| ATOM | 3588 | O   | ARG | A | 557 | -10.594 | -26.834 | -24.536 | 1.00 | 0.00 | A | O |
| ATOM | 3589 | N   | GLY | A | 558 | -9.828  | -25.327 | -26.052 | 1.00 | 0.00 | A | N |
| ATOM | 3590 | CA  | GLY | A | 558 | -10.604 | -25.795 | -27.163 | 1.00 | 0.00 | A | C |

|      |      |     |           |         |         |         |      |      |   |   |
|------|------|-----|-----------|---------|---------|---------|------|------|---|---|
| ATOM | 3591 | C   | GLY A 558 | -11.732 | -24.835 | -27.402 | 1.00 | 0.00 | A | C |
| ATOM | 3592 | O   | GLY A 558 | -12.561 | -25.056 | -28.284 | 1.00 | 0.00 | A | O |
| ATOM | 3593 | N   | PHE A 559 | -11.805 | -23.741 | -26.618 | 1.00 | 0.00 | A | N |
| ATOM | 3594 | CA  | PHE A 559 | -12.846 | -22.769 | -26.824 | 1.00 | 0.00 | A | C |
| ATOM | 3595 | CB  | PHE A 559 | -13.628 | -22.454 | -25.535 | 1.00 | 0.00 | A | C |
| ATOM | 3596 | CG  | PHE A 559 | -14.408 | -23.698 | -25.265 | 1.00 | 0.00 | A | C |
| ATOM | 3597 | CD1 | PHE A 559 | -13.794 | -24.797 | -24.713 | 1.00 | 0.00 | A | C |
| ATOM | 3598 | CE1 | PHE A 559 | -14.480 | -25.960 | -24.466 | 1.00 | 0.00 | A | C |
| ATOM | 3599 | CZ  | PHE A 559 | -15.812 | -26.031 | -24.789 | 1.00 | 0.00 | A | C |
| ATOM | 3600 | CD2 | PHE A 559 | -15.739 | -23.789 | -25.602 | 1.00 | 0.00 | A | C |
| ATOM | 3601 | CE2 | PHE A 559 | -16.440 | -24.948 | -25.358 | 1.00 | 0.00 | A | C |
| ATOM | 3602 | C   | PHE A 559 | -12.190 | -21.556 | -27.380 | 1.00 | 0.00 | A | C |
| ATOM | 3603 | O   | PHE A 559 | -11.081 | -21.221 | -26.998 | 1.00 | 0.00 | A | O |
| ATOM | 3604 | N   | GLN A 560 | -12.814 | -20.864 | -28.342 | 1.00 | 0.00 | A | N |
| ATOM | 3605 | CA  | GLN A 560 | -12.128 | -19.800 | -29.015 | 1.00 | 0.00 | A | C |
| ATOM | 3606 | CB  | GLN A 560 | -12.994 | -19.151 | -30.108 | 1.00 | 0.00 | A | C |
| ATOM | 3607 | CG  | GLN A 560 | -13.380 | -20.074 | -31.266 | 1.00 | 0.00 | A | C |
| ATOM | 3608 | CD  | GLN A 560 | -14.619 | -20.891 | -30.914 | 1.00 | 0.00 | A | C |
| ATOM | 3609 | OE1 | GLN A 560 | -14.995 | -21.080 | -29.760 | 1.00 | 0.00 | A | O |
| ATOM | 3610 | NE2 | GLN A 560 | -15.292 | -21.401 | -31.981 | 1.00 | 0.00 | A | N |
| ATOM | 3611 | C   | GLN A 560 | -11.770 | -18.701 | -28.067 | 1.00 | 0.00 | A | C |
| ATOM | 3612 | O   | GLN A 560 | -10.639 | -18.223 | -28.058 | 1.00 | 0.00 | A | O |
| ATOM | 3613 | N   | GLN A 561 | -12.731 | -18.246 | -27.248 | 1.00 | 0.00 | A | N |
| ATOM | 3614 | CA  | GLN A 561 | -12.418 | -17.167 | -26.357 | 1.00 | 0.00 | A | C |
| ATOM | 3615 | CB  | GLN A 561 | -13.649 | -16.684 | -25.568 | 1.00 | 0.00 | A | C |
| ATOM | 3616 | CG  | GLN A 561 | -14.715 | -15.964 | -26.399 | 1.00 | 0.00 | A | C |
| ATOM | 3617 | CD  | GLN A 561 | -14.370 | -14.482 | -26.400 | 1.00 | 0.00 | A | C |
| ATOM | 3618 | OE1 | GLN A 561 | -13.220 | -14.107 | -26.179 | 1.00 | 0.00 | A | O |
| ATOM | 3619 | NE2 | GLN A 561 | -15.391 | -13.616 | -26.640 | 1.00 | 0.00 | A | N |
| ATOM | 3620 | C   | GLN A 561 | -11.438 | -17.645 | -25.331 | 1.00 | 0.00 | A | C |
| ATOM | 3621 | O   | GLN A 561 | -10.409 | -17.018 | -25.084 | 1.00 | 0.00 | A | O |
| ATOM | 3622 | N   | MET A 562 | -11.752 | -18.801 | -24.721 | 1.00 | 0.00 | A | N |
| ATOM | 3623 | CA  | MET A 562 | -11.030 | -19.343 | -23.608 | 1.00 | 0.00 | A | C |
| ATOM | 3624 | CB  | MET A 562 | -11.759 | -20.557 | -23.039 | 1.00 | 0.00 | A | C |
| ATOM | 3625 | CG  | MET A 562 | -13.222 | -20.248 | -22.727 | 1.00 | 0.00 | A | C |
| ATOM | 3626 | SD  | MET A 562 | -13.463 | -18.740 | -21.743 | 1.00 | 0.00 | A | S |
| ATOM | 3627 | CE  | MET A 562 | -12.571 | -19.350 | -20.282 | 1.00 | 0.00 | A | C |
| ATOM | 3628 | C   | MET A 562 | -9.655  | -19.796 | -23.974 | 1.00 | 0.00 | A | C |

|      |      |     |           |        |         |         |      |      |   |   |
|------|------|-----|-----------|--------|---------|---------|------|------|---|---|
| ATOM | 3629 | O   | MET A 562 | -8.681 | -19.548 | -23.271 | 1.00 | 0.00 | A | O |
| ATOM | 3630 | N   | GLY A 563 | -9.565 | -20.470 | -25.117 | 1.00 | 0.00 | A | N |
| ATOM | 3631 | CA  | GLY A 563 | -8.400 | -21.106 | -25.644 | 1.00 | 0.00 | A | C |
| ATOM | 3632 | C   | GLY A 563 | -7.374 | -20.060 | -25.853 | 1.00 | 0.00 | A | C |
| ATOM | 3633 | O   | GLY A 563 | -6.187 | -20.285 | -25.632 | 1.00 | 0.00 | A | O |
| ATOM | 3634 | N   | ILE A 564 | -7.806 | -18.875 | -26.308 | 1.00 | 0.00 | A | N |
| ATOM | 3635 | CA  | ILE A 564 | -6.842 | -17.857 | -26.579 | 1.00 | 0.00 | A | C |
| ATOM | 3636 | CB  | ILE A 564 | -7.428 | -16.649 | -27.232 | 1.00 | 0.00 | A | C |
| ATOM | 3637 | CG2 | ILE A 564 | -6.297 | -15.640 | -27.488 | 1.00 | 0.00 | A | C |
| ATOM | 3638 | CG1 | ILE A 564 | -8.180 | -17.103 | -28.491 | 1.00 | 0.00 | A | C |
| ATOM | 3639 | CD  | ILE A 564 | -7.450 | -18.198 | -29.269 | 1.00 | 0.00 | A | C |
| ATOM | 3640 | C   | ILE A 564 | -6.171 | -17.447 | -25.303 | 1.00 | 0.00 | A | C |
| ATOM | 3641 | O   | ILE A 564 | -4.957 | -17.265 | -25.270 | 1.00 | 0.00 | A | O |
| ATOM | 3642 | N   | TYR A 565 | -6.940 | -17.298 | -24.212 | 1.00 | 0.00 | A | N |
| ATOM | 3643 | CA  | TYR A 565 | -6.371 | -16.833 | -22.978 | 1.00 | 0.00 | A | C |
| ATOM | 3644 | CB  | TYR A 565 | -7.443 | -16.507 | -21.927 | 1.00 | 0.00 | A | C |
| ATOM | 3645 | CG  | TYR A 565 | -8.058 | -15.240 | -22.417 | 1.00 | 0.00 | A | C |
| ATOM | 3646 | CD1 | TYR A 565 | -9.098 | -15.254 | -23.316 | 1.00 | 0.00 | A | C |
| ATOM | 3647 | CE1 | TYR A 565 | -9.645 | -14.077 | -23.766 | 1.00 | 0.00 | A | C |
| ATOM | 3648 | CZ  | TYR A 565 | -9.151 | -12.872 | -23.328 | 1.00 | 0.00 | A | C |
| ATOM | 3649 | OH  | TYR A 565 | -9.715 | -11.665 | -23.792 | 1.00 | 0.00 | A | O |
| ATOM | 3650 | CD2 | TYR A 565 | -7.562 | -14.027 | -21.991 | 1.00 | 0.00 | A | C |
| ATOM | 3651 | CE2 | TYR A 565 | -8.104 | -12.847 | -22.437 | 1.00 | 0.00 | A | C |
| ATOM | 3652 | C   | TYR A 565 | -5.373 | -17.801 | -22.419 | 1.00 | 0.00 | A | C |
| ATOM | 3653 | O   | TYR A 565 | -4.306 | -17.392 | -21.963 | 1.00 | 0.00 | A | O |
| ATOM | 3654 | N   | ALA A 566 | -5.674 | -19.110 | -22.442 | 1.00 | 0.00 | A | N |
| ATOM | 3655 | CA  | ALA A 566 | -4.754 | -20.057 | -21.875 | 1.00 | 0.00 | A | C |
| ATOM | 3656 | CB  | ALA A 566 | -5.249 | -21.509 | -21.958 | 1.00 | 0.00 | A | C |
| ATOM | 3657 | C   | ALA A 566 | -3.471 | -19.992 | -22.637 | 1.00 | 0.00 | A | C |
| ATOM | 3658 | O   | ALA A 566 | -2.389 | -20.010 | -22.056 | 1.00 | 0.00 | A | O |
| ATOM | 3659 | N   | VAL A 567 | -3.575 | -19.901 | -23.973 | 1.00 | 0.00 | A | N |
| ATOM | 3660 | CA  | VAL A 567 | -2.416 | -19.904 | -24.813 | 1.00 | 0.00 | A | C |
| ATOM | 3661 | CB  | VAL A 567 | -2.757 | -19.858 | -26.274 | 1.00 | 0.00 | A | C |
| ATOM | 3662 | CG1 | VAL A 567 | -1.449 | -19.804 | -27.082 | 1.00 | 0.00 | A | C |
| ATOM | 3663 | CG2 | VAL A 567 | -3.641 | -21.073 | -26.606 | 1.00 | 0.00 | A | C |
| ATOM | 3664 | C   | VAL A 567 | -1.575 | -18.709 | -24.486 | 1.00 | 0.00 | A | C |
| ATOM | 3665 | O   | VAL A 567 | -0.353 | -18.811 | -24.388 | 1.00 | 0.00 | A | O |
| ATOM | 3666 | N   | MET A 568 | -2.205 | -17.535 | -24.293 | 1.00 | 0.00 | A | N |

|      |      |     |           |        |         |         |      |      |   |   |
|------|------|-----|-----------|--------|---------|---------|------|------|---|---|
| ATOM | 3667 | CA  | MET A 568 | -1.428 | -16.355 | -24.045 | 1.00 | 0.00 | A | C |
| ATOM | 3668 | CB  | MET A 568 | -2.253 | -15.058 | -24.026 | 1.00 | 0.00 | A | C |
| ATOM | 3669 | CG  | MET A 568 | -3.287 | -14.970 | -22.907 | 1.00 | 0.00 | A | C |
| ATOM | 3670 | SD  | MET A 568 | -4.173 | -13.384 | -22.866 | 1.00 | 0.00 | A | S |
| ATOM | 3671 | CE  | MET A 568 | -4.923 | -13.591 | -24.507 | 1.00 | 0.00 | A | C |
| ATOM | 3672 | C   | MET A 568 | -0.712 | -16.498 | -22.742 | 1.00 | 0.00 | A | C |
| ATOM | 3673 | O   | MET A 568 | 0.442  | -16.092 | -22.612 | 1.00 | 0.00 | A | O |
| ATOM | 3674 | N   | ILE A 569 | -1.381 | -17.093 | -21.739 | 1.00 | 0.00 | A | N |
| ATOM | 3675 | CA  | ILE A 569 | -0.787 | -17.258 | -20.445 | 1.00 | 0.00 | A | C |
| ATOM | 3676 | CB  | ILE A 569 | -1.711 | -17.926 | -19.473 | 1.00 | 0.00 | A | C |
| ATOM | 3677 | CG2 | ILE A 569 | -0.876 | -18.416 | -18.287 | 1.00 | 0.00 | A | C |
| ATOM | 3678 | CG1 | ILE A 569 | -2.875 | -17.000 | -19.097 | 1.00 | 0.00 | A | C |
| ATOM | 3679 | CD  | ILE A 569 | -3.977 | -17.706 | -18.308 | 1.00 | 0.00 | A | C |
| ATOM | 3680 | C   | ILE A 569 | 0.415  | -18.131 | -20.567 | 1.00 | 0.00 | A | C |
| ATOM | 3681 | O   | ILE A 569 | 1.469  | -17.833 | -20.009 | 1.00 | 0.00 | A | O |
| ATOM | 3682 | N   | GLU A 570 | 0.295  | -19.237 | -21.314 | 1.00 | 0.00 | A | N |
| ATOM | 3683 | CA  | GLU A 570 | 1.407  | -20.129 | -21.422 | 1.00 | 0.00 | A | C |
| ATOM | 3684 | CB  | GLU A 570 | 1.053  | -21.433 | -22.132 | 1.00 | 0.00 | A | C |
| ATOM | 3685 | CG  | GLU A 570 | 0.256  | -22.325 | -21.188 | 1.00 | 0.00 | A | C |
| ATOM | 3686 | CD  | GLU A 570 | -0.489 | -23.324 | -22.033 | 1.00 | 0.00 | A | C |
| ATOM | 3687 | OE1 | GLU A 570 | 0.115  | -24.359 | -22.416 | 1.00 | 0.00 | A | O |
| ATOM | 3688 | OE2 | GLU A 570 | -1.686 | -23.054 | -22.312 | 1.00 | 0.00 | A | O |
| ATOM | 3689 | C   | GLU A 570 | 2.531  | -19.438 | -22.117 | 1.00 | 0.00 | A | C |
| ATOM | 3690 | O   | GLU A 570 | 3.691  | -19.650 | -21.774 | 1.00 | 0.00 | A | O |
| ATOM | 3691 | N   | LYS A 571 | 2.217  | -18.583 | -23.105 | 1.00 | 0.00 | A | N |
| ATOM | 3692 | CA  | LYS A 571 | 3.231  | -17.889 | -23.846 | 1.00 | 0.00 | A | C |
| ATOM | 3693 | CB  | LYS A 571 | 2.655  | -16.963 | -24.929 | 1.00 | 0.00 | A | C |
| ATOM | 3694 | CG  | LYS A 571 | 3.727  | -16.132 | -25.644 | 1.00 | 0.00 | A | C |
| ATOM | 3695 | CD  | LYS A 571 | 4.669  | -16.935 | -26.543 | 1.00 | 0.00 | A | C |
| ATOM | 3696 | CE  | LYS A 571 | 5.757  | -16.075 | -27.192 | 1.00 | 0.00 | A | C |
| ATOM | 3697 | NZ  | LYS A 571 | 6.270  | -16.736 | -28.409 | 1.00 | 0.00 | A | N |
| ATOM | 3698 | C   | LYS A 571 | 4.017  | -17.002 | -22.935 | 1.00 | 0.00 | A | C |
| ATOM | 3699 | O   | LYS A 571 | 5.238  | -16.913 | -23.038 | 1.00 | 0.00 | A | O |
| ATOM | 3700 | N   | MET A 572 | 3.338  | -16.298 | -22.019 | 1.00 | 0.00 | A | N |
| ATOM | 3701 | CA  | MET A 572 | 4.063  | -15.378 | -21.199 | 1.00 | 0.00 | A | C |
| ATOM | 3702 | CB  | MET A 572 | 3.126  | -14.511 | -20.347 | 1.00 | 0.00 | A | C |
| ATOM | 3703 | CG  | MET A 572 | 2.237  | -13.661 | -21.257 | 1.00 | 0.00 | A | C |
| ATOM | 3704 | SD  | MET A 572 | 1.088  | -12.517 | -20.446 | 1.00 | 0.00 | A | S |

|      |      |               |        |         |         |      |      |   |   |
|------|------|---------------|--------|---------|---------|------|------|---|---|
| ATOM | 3705 | CE MET A 572  | 0.407  | -11.963 | -22.035 | 1.00 | 0.00 | A | C |
| ATOM | 3706 | C MET A 572   | 5.021  | -16.116 | -20.323 | 1.00 | 0.00 | A | C |
| ATOM | 3707 | O MET A 572   | 6.167  | -15.693 | -20.149 | 1.00 | 0.00 | A | O |
| ATOM | 3708 | N ILE A 573   | 4.575  | -17.237 | -19.741 | 1.00 | 0.00 | A | N |
| ATOM | 3709 | CA ILE A 573  | 5.362  | -18.016 | -18.830 | 1.00 | 0.00 | A | C |
| ATOM | 3710 | CB ILE A 573  | 4.523  | -19.055 | -18.147 | 1.00 | 0.00 | A | C |
| ATOM | 3711 | CG2 ILE A 573 | 5.424  | -19.856 | -17.191 | 1.00 | 0.00 | A | C |
| ATOM | 3712 | CG1 ILE A 573 | 3.346  | -18.364 | -17.434 | 1.00 | 0.00 | A | C |
| ATOM | 3713 | CD ILE A 573  | 2.244  | -19.317 | -16.979 | 1.00 | 0.00 | A | C |
| ATOM | 3714 | C ILE A 573   | 6.491  | -18.691 | -19.540 | 1.00 | 0.00 | A | C |
| ATOM | 3715 | O ILE A 573   | 7.618  | -18.706 | -19.049 | 1.00 | 0.00 | A | O |
| ATOM | 3716 | N LEU A 574   | 6.233  | -19.311 | -20.704 | 1.00 | 0.00 | A | N |
| ATOM | 3717 | CA LEU A 574  | 7.332  | -19.986 | -21.315 | 1.00 | 0.00 | A | C |
| ATOM | 3718 | CB LEU A 574  | 6.881  | -20.767 | -22.558 | 1.00 | 0.00 | A | C |
| ATOM | 3719 | CG LEU A 574  | 5.711  | -21.721 | -22.244 | 1.00 | 0.00 | A | C |
| ATOM | 3720 | CD1 LEU A 574 | 5.325  | -22.566 | -23.463 | 1.00 | 0.00 | A | C |
| ATOM | 3721 | CD2 LEU A 574 | 5.979  | -22.558 | -20.984 | 1.00 | 0.00 | A | C |
| ATOM | 3722 | C LEU A 574   | 8.364  | -18.976 | -21.740 | 1.00 | 0.00 | A | C |
| ATOM | 3723 | O LEU A 574   | 9.509  | -19.030 | -21.293 | 1.00 | 0.00 | A | O |
| ATOM | 3724 | N ARG A 575   | 7.987  | -18.047 | -22.647 | 1.00 | 0.00 | A | N |
| ATOM | 3725 | CA ARG A 575  | 8.926  | -17.097 | -23.191 | 1.00 | 0.00 | A | C |
| ATOM | 3726 | CB ARG A 575  | 8.421  | -16.574 | -24.540 | 1.00 | 0.00 | A | C |
| ATOM | 3727 | CG ARG A 575  | 8.025  | -17.705 | -25.488 | 1.00 | 0.00 | A | C |
| ATOM | 3728 | CD ARG A 575  | 9.202  | -18.583 | -25.908 | 1.00 | 0.00 | A | C |
| ATOM | 3729 | NE ARG A 575  | 8.672  | -19.613 | -26.847 | 1.00 | 0.00 | A | N |
| ATOM | 3730 | CZ ARG A 575  | 8.489  | -19.300 | -28.164 | 1.00 | 0.00 | A | C |
| ATOM | 3731 | NH1 ARG A 575 | 8.774  | -18.046 | -28.617 | 1.00 | 0.00 | A | N |
| ATOM | 3732 | NH2 ARG A 575 | 8.014  | -20.242 | -29.033 | 1.00 | 0.00 | A | N |
| ATOM | 3733 | C ARG A 575   | 9.273  | -15.873 | -22.380 | 1.00 | 0.00 | A | C |
| ATOM | 3734 | O ARG A 575   | 10.378 | -15.741 | -21.856 | 1.00 | 0.00 | A | O |
| ATOM | 3735 | N ASP A 576   | 8.279  | -14.967 | -22.214 | 1.00 | 0.00 | A | N |
| ATOM | 3736 | CA ASP A 576  | 8.505  | -13.619 | -21.745 | 1.00 | 0.00 | A | C |
| ATOM | 3737 | CB ASP A 576  | 7.244  | -12.748 | -21.908 | 1.00 | 0.00 | A | C |
| ATOM | 3738 | CG ASP A 576  | 7.634  | -11.277 | -21.872 | 1.00 | 0.00 | A | C |
| ATOM | 3739 | OD1 ASP A 576 | 8.588  | -10.926 | -21.130 | 1.00 | 0.00 | A | O |
| ATOM | 3740 | OD2 ASP A 576 | 6.974  | -10.480 | -22.594 | 1.00 | 0.00 | A | O |
| ATOM | 3741 | C ASP A 576   | 8.940  | -13.549 | -20.317 | 1.00 | 0.00 | A | C |
| ATOM | 3742 | O ASP A 576   | 9.938  | -12.909 | -19.989 | 1.00 | 0.00 | A | O |

|      |      |     |           |        |         |         |      |      |   |   |
|------|------|-----|-----------|--------|---------|---------|------|------|---|---|
| ATOM | 3743 | N   | LEU A 577 | 8.188  | -14.212 | -19.425 | 1.00 | 0.00 | A | N |
| ATOM | 3744 | CA  | LEU A 577 | 8.489  | -14.190 | -18.028 | 1.00 | 0.00 | A | C |
| ATOM | 3745 | CB  | LEU A 577 | 7.459  | -14.956 | -17.188 | 1.00 | 0.00 | A | C |
| ATOM | 3746 | CG  | LEU A 577 | 7.909  | -15.137 | -15.730 | 1.00 | 0.00 | A | C |
| ATOM | 3747 | CD1 | LEU A 577 | 8.166  | -13.787 | -15.048 | 1.00 | 0.00 | A | C |
| ATOM | 3748 | CD2 | LEU A 577 | 6.933  | -16.028 | -14.952 | 1.00 | 0.00 | A | C |
| ATOM | 3749 | C   | LEU A 577 | 9.795  | -14.868 | -17.818 | 1.00 | 0.00 | A | C |
| ATOM | 3750 | O   | LEU A 577 | 10.646 | -14.385 | -17.074 | 1.00 | 0.00 | A | O |
| ATOM | 3751 | N   | CYS A 578 | 9.986  | -16.007 | -18.499 | 1.00 | 0.00 | A | N |
| ATOM | 3752 | CA  | CYS A 578 | 11.168 | -16.786 | -18.301 | 1.00 | 0.00 | A | C |
| ATOM | 3753 | CB  | CYS A 578 | 11.173 | -18.071 | -19.145 | 1.00 | 0.00 | A | C |
| ATOM | 3754 | SG  | CYS A 578 | 12.670 | -19.069 | -18.900 | 1.00 | 0.00 | A | S |
| ATOM | 3755 | C   | CYS A 578 | 12.356 | -15.977 | -18.701 | 1.00 | 0.00 | A | C |
| ATOM | 3756 | O   | CYS A 578 | 13.360 | -15.950 | -17.993 | 1.00 | 0.00 | A | O |
| ATOM | 3757 | N   | ARG A 579 | 12.277 | -15.291 | -19.853 | 1.00 | 0.00 | A | N |
| ATOM | 3758 | CA  | ARG A 579 | 13.402 | -14.538 | -20.315 | 1.00 | 0.00 | A | C |
| ATOM | 3759 | CB  | ARG A 579 | 13.164 | -13.923 | -21.704 | 1.00 | 0.00 | A | C |
| ATOM | 3760 | CG  | ARG A 579 | 13.131 | -14.955 | -22.833 | 1.00 | 0.00 | A | C |
| ATOM | 3761 | CD  | ARG A 579 | 12.554 | -14.410 | -24.138 | 1.00 | 0.00 | A | C |
| ATOM | 3762 | NE  | ARG A 579 | 12.788 | -15.428 | -25.204 | 1.00 | 0.00 | A | N |
| ATOM | 3763 | CZ  | ARG A 579 | 11.854 | -15.631 | -26.176 | 1.00 | 0.00 | A | C |
| ATOM | 3764 | NH1 | ARG A 579 | 10.674 | -14.946 | -26.140 | 1.00 | 0.00 | A | N |
| ATOM | 3765 | NH2 | ARG A 579 | 12.091 | -16.528 | -27.179 | 1.00 | 0.00 | A | N |
| ATOM | 3766 | C   | ARG A 579 | 13.690 | -13.420 | -19.360 | 1.00 | 0.00 | A | C |
| ATOM | 3767 | O   | ARG A 579 | 14.841 | -13.181 | -19.004 | 1.00 | 0.00 | A | O |
| ATOM | 3768 | N   | PHE A 580 | 12.635 | -12.717 | -18.905 | 1.00 | 0.00 | A | N |
| ATOM | 3769 | CA  | PHE A 580 | 12.774 | -11.562 | -18.061 | 1.00 | 0.00 | A | C |
| ATOM | 3770 | CB  | PHE A 580 | 11.438 | -10.847 | -17.810 | 1.00 | 0.00 | A | C |
| ATOM | 3771 | CG  | PHE A 580 | 11.773 | -9.514  | -17.244 | 1.00 | 0.00 | A | C |
| ATOM | 3772 | CD1 | PHE A 580 | 12.134 | -8.490  | -18.088 | 1.00 | 0.00 | A | C |
| ATOM | 3773 | CE1 | PHE A 580 | 12.450 | -7.251  | -17.588 | 1.00 | 0.00 | A | C |
| ATOM | 3774 | CZ  | PHE A 580 | 12.402 | -7.037  | -16.233 | 1.00 | 0.00 | A | C |
| ATOM | 3775 | CD2 | PHE A 580 | 11.729 | -9.287  | -15.887 | 1.00 | 0.00 | A | C |
| ATOM | 3776 | CE2 | PHE A 580 | 12.042 | -8.049  | -15.380 | 1.00 | 0.00 | A | C |
| ATOM | 3777 | C   | PHE A 580 | 13.328 | -11.951 | -16.733 | 1.00 | 0.00 | A | C |
| ATOM | 3778 | O   | PHE A 580 | 14.175 | -11.254 | -16.180 | 1.00 | 0.00 | A | O |
| ATOM | 3779 | N   | MET A 581 | 12.884 | -13.094 | -16.188 | 1.00 | 0.00 | A | N |
| ATOM | 3780 | CA  | MET A 581 | 13.311 | -13.456 | -14.873 | 1.00 | 0.00 | A | C |



|      |      |     |     |   |     |        |         |         |      |      |   |   |
|------|------|-----|-----|---|-----|--------|---------|---------|------|------|---|---|
| ATOM | 3781 | CB  | MET | A | 581 | 12.724 | -14.774 | -14.361 | 1.00 | 0.00 | A | C |
| ATOM | 3782 | CG  | MET | A | 581 | 13.400 | -15.199 | -13.059 | 1.00 | 0.00 | A | C |
| ATOM | 3783 | SD  | MET | A | 581 | 12.455 | -16.357 | -12.044 | 1.00 | 0.00 | A | S |
| ATOM | 3784 | CE  | MET | A | 581 | 11.591 | -15.054 | -11.119 | 1.00 | 0.00 | A | C |
| ATOM | 3785 | C   | MET | A | 581 | 14.793 | -13.577 | -14.872 | 1.00 | 0.00 | A | C |
| ATOM | 3786 | O   | MET | A | 581 | 15.441 | -13.236 | -13.885 | 1.00 | 0.00 | A | O |
| ATOM | 3787 | N   | PHE | A | 582 | 15.388 | -14.070 | -15.969 | 1.00 | 0.00 | A | N |
| ATOM | 3788 | CA  | PHE | A | 582 | 16.817 | -14.151 | -15.953 | 1.00 | 0.00 | A | C |
| ATOM | 3789 | CB  | PHE | A | 582 | 17.422 | -14.719 | -17.249 | 1.00 | 0.00 | A | C |
| ATOM | 3790 | CG  | PHE | A | 582 | 17.154 | -16.184 | -17.304 | 1.00 | 0.00 | A | C |
| ATOM | 3791 | CD1 | PHE | A | 582 | 17.805 | -17.034 | -16.439 | 1.00 | 0.00 | A | C |
| ATOM | 3792 | CE1 | PHE | A | 582 | 17.578 | -18.388 | -16.476 | 1.00 | 0.00 | A | C |
| ATOM | 3793 | CZ  | PHE | A | 582 | 16.696 | -18.909 | -17.395 | 1.00 | 0.00 | A | C |
| ATOM | 3794 | CD2 | PHE | A | 582 | 16.281 | -16.714 | -18.226 | 1.00 | 0.00 | A | C |
| ATOM | 3795 | CE2 | PHE | A | 582 | 16.051 | -18.070 | -18.269 | 1.00 | 0.00 | A | C |
| ATOM | 3796 | C   | PHE | A | 582 | 17.371 | -12.769 | -15.776 | 1.00 | 0.00 | A | C |
| ATOM | 3797 | O   | PHE | A | 582 | 18.249 | -12.553 | -14.943 | 1.00 | 0.00 | A | O |
| ATOM | 3798 | N   | VAL | A | 583 | 16.866 | -11.794 | -16.558 | 1.00 | 0.00 | A | N |
| ATOM | 3799 | CA  | VAL | A | 583 | 17.355 | -10.442 | -16.526 | 1.00 | 0.00 | A | C |
| ATOM | 3800 | CB  | VAL | A | 583 | 16.705 | -9.586  | -17.574 | 1.00 | 0.00 | A | C |
| ATOM | 3801 | CG1 | VAL | A | 583 | 17.233 | -8.148  | -17.430 | 1.00 | 0.00 | A | C |
| ATOM | 3802 | CG2 | VAL | A | 583 | 16.951 | -10.217 | -18.953 | 1.00 | 0.00 | A | C |
| ATOM | 3803 | C   | VAL | A | 583 | 17.072 | -9.784  | -15.203 | 1.00 | 0.00 | A | C |
| ATOM | 3804 | O   | VAL | A | 583 | 17.954 | -9.169  | -14.609 | 1.00 | 0.00 | A | O |
| ATOM | 3805 | N   | TYR | A | 584 | 15.830 | -9.892  | -14.698 | 1.00 | 0.00 | A | N |
| ATOM | 3806 | CA  | TYR | A | 584 | 15.470 | -9.243  | -13.471 | 1.00 | 0.00 | A | C |
| ATOM | 3807 | CB  | TYR | A | 584 | 13.978 | -9.384  | -13.109 | 1.00 | 0.00 | A | C |
| ATOM | 3808 | CG  | TYR | A | 584 | 13.793 | -8.869  | -11.722 | 1.00 | 0.00 | A | C |
| ATOM | 3809 | CD1 | TYR | A | 584 | 14.010 | -7.543  | -11.417 | 1.00 | 0.00 | A | C |
| ATOM | 3810 | CE1 | TYR | A | 584 | 13.835 | -7.078  | -10.132 | 1.00 | 0.00 | A | C |
| ATOM | 3811 | CZ  | TYR | A | 584 | 13.427 | -7.942  | -9.142  | 1.00 | 0.00 | A | C |
| ATOM | 3812 | OH  | TYR | A | 584 | 13.243 | -7.494  | -7.819  | 1.00 | 0.00 | A | O |
| ATOM | 3813 | CD2 | TYR | A | 584 | 13.367 | -9.716  | -10.723 | 1.00 | 0.00 | A | C |
| ATOM | 3814 | CE2 | TYR | A | 584 | 13.190 | -9.259  | -9.440  | 1.00 | 0.00 | A | C |
| ATOM | 3815 | C   | TYR | A | 584 | 16.285 | -9.828  | -12.376 | 1.00 | 0.00 | A | C |
| ATOM | 3816 | O   | TYR | A | 584 | 16.773 | -9.116  | -11.501 | 1.00 | 0.00 | A | O |
| ATOM | 3817 | N   | ILE | A | 585 | 16.459 | -11.160 | -12.399 | 1.00 | 0.00 | A | N |
| ATOM | 3818 | CA  | ILE | A | 585 | 17.240 | -11.785 | -11.380 | 1.00 | 0.00 | A | C |

|      |      |     |     |   |     |        |         |         |      |      |   |   |
|------|------|-----|-----|---|-----|--------|---------|---------|------|------|---|---|
| ATOM | 3819 | CB  | ILE | A | 585 | 17.218 | -13.283 | -11.433 | 1.00 | 0.00 | A | C |
| ATOM | 3820 | CG2 | ILE | A | 585 | 18.533 | -13.814 | -10.844 | 1.00 | 0.00 | A | C |
| ATOM | 3821 | CG1 | ILE | A | 585 | 15.957 | -13.793 | -10.711 | 1.00 | 0.00 | A | C |
| ATOM | 3822 | CD  | ILE | A | 585 | 14.652 | -13.233 | -11.261 | 1.00 | 0.00 | A | C |
| ATOM | 3823 | C   | ILE | A | 585 | 18.649 | -11.293 | -11.423 | 1.00 | 0.00 | A | C |
| ATOM | 3824 | O   | ILE | A | 585 | 19.230 | -11.031 | -10.372 | 1.00 | 0.00 | A | O |
| ATOM | 3825 | N   | VAL | A | 586 | 19.251 | -11.151 | -12.619 | 1.00 | 0.00 | A | N |
| ATOM | 3826 | CA  | VAL | A | 586 | 20.615 | -10.712 | -12.633 | 1.00 | 0.00 | A | C |
| ATOM | 3827 | CB  | VAL | A | 586 | 21.260 | -10.742 | -13.993 | 1.00 | 0.00 | A | C |
| ATOM | 3828 | CG1 | VAL | A | 586 | 20.626 | -9.679  | -14.904 | 1.00 | 0.00 | A | C |
| ATOM | 3829 | CG2 | VAL | A | 586 | 22.774 | -10.559 | -13.806 | 1.00 | 0.00 | A | C |
| ATOM | 3830 | C   | VAL | A | 586 | 20.708 | -9.323  | -12.077 | 1.00 | 0.00 | A | C |
| ATOM | 3831 | O   | VAL | A | 586 | 21.565 | -9.049  | -11.238 | 1.00 | 0.00 | A | O |
| ATOM | 3832 | N   | PHE | A | 587 | 19.823 | -8.402  | -12.513 | 1.00 | 0.00 | A | N |
| ATOM | 3833 | CA  | PHE | A | 587 | 19.893 | -7.054  | -12.021 | 1.00 | 0.00 | A | C |
| ATOM | 3834 | CB  | PHE | A | 587 | 18.950 | -6.069  | -12.739 | 1.00 | 0.00 | A | C |
| ATOM | 3835 | CG  | PHE | A | 587 | 19.625 | -5.625  | -13.996 | 1.00 | 0.00 | A | C |
| ATOM | 3836 | CD1 | PHE | A | 587 | 20.482 | -4.546  | -13.972 | 1.00 | 0.00 | A | C |
| ATOM | 3837 | CE1 | PHE | A | 587 | 21.117 | -4.118  | -15.116 | 1.00 | 0.00 | A | C |
| ATOM | 3838 | CZ  | PHE | A | 587 | 20.896 | -4.769  | -16.304 | 1.00 | 0.00 | A | C |
| ATOM | 3839 | CD2 | PHE | A | 587 | 19.411 | -6.270  | -15.191 | 1.00 | 0.00 | A | C |
| ATOM | 3840 | CE2 | PHE | A | 587 | 20.042 | -5.844  | -16.339 | 1.00 | 0.00 | A | C |
| ATOM | 3841 | C   | PHE | A | 587 | 19.595 | -7.022  | -10.556 | 1.00 | 0.00 | A | C |
| ATOM | 3842 | O   | PHE | A | 587 | 20.297 | -6.362  | -9.791  | 1.00 | 0.00 | A | O |
| ATOM | 3843 | N   | LEU | A | 588 | 18.549 | -7.746  | -10.119 | 1.00 | 0.00 | A | N |
| ATOM | 3844 | CA  | LEU | A | 588 | 18.178 | -7.707  | -8.734  | 1.00 | 0.00 | A | C |
| ATOM | 3845 | CB  | LEU | A | 588 | 16.901 | -8.525  | -8.434  | 1.00 | 0.00 | A | C |
| ATOM | 3846 | CG  | LEU | A | 588 | 17.067 | -10.064 | -8.355  | 1.00 | 0.00 | A | C |
| ATOM | 3847 | CD1 | LEU | A | 588 | 17.652 | -10.525 | -7.006  | 1.00 | 0.00 | A | C |
| ATOM | 3848 | CD2 | LEU | A | 588 | 15.759 | -10.794 | -8.688  | 1.00 | 0.00 | A | C |
| ATOM | 3849 | C   | LEU | A | 588 | 19.295 | -8.270  | -7.916  | 1.00 | 0.00 | A | C |
| ATOM | 3850 | O   | LEU | A | 588 | 19.684 | -7.701  | -6.898  | 1.00 | 0.00 | A | O |
| ATOM | 3851 | N   | PHE | A | 589 | 19.861 | -9.402  | -8.364  | 1.00 | 0.00 | A | N |
| ATOM | 3852 | CA  | PHE | A | 589 | 20.845 | -10.072 | -7.573  | 1.00 | 0.00 | A | C |
| ATOM | 3853 | CB  | PHE | A | 589 | 21.278 | -11.420 | -8.167  | 1.00 | 0.00 | A | C |
| ATOM | 3854 | CG  | PHE | A | 589 | 22.129 | -12.092 | -7.145  | 1.00 | 0.00 | A | C |
| ATOM | 3855 | CD1 | PHE | A | 589 | 21.556 | -12.905 | -6.193  | 1.00 | 0.00 | A | C |
| ATOM | 3856 | CE1 | PHE | A | 589 | 22.329 | -13.527 | -5.243  | 1.00 | 0.00 | A | C |

|      |      |     |           |        |         |         |      |      |   |   |
|------|------|-----|-----------|--------|---------|---------|------|------|---|---|
| ATOM | 3857 | CZ  | PHE A 589 | 23.691 | -13.336 | -5.239  | 1.00 | 0.00 | A | C |
| ATOM | 3858 | CD2 | PHE A 589 | 23.490 | -11.901 | -7.133  | 1.00 | 0.00 | A | C |
| ATOM | 3859 | CE2 | PHE A 589 | 24.269 | -12.523 | -6.185  | 1.00 | 0.00 | A | C |
| ATOM | 3860 | C   | PHE A 589 | 22.054 | -9.204  | -7.422  | 1.00 | 0.00 | A | C |
| ATOM | 3861 | O   | PHE A 589 | 22.589 | -9.067  | -6.323  | 1.00 | 0.00 | A | O |
| ATOM | 3862 | N   | GLY A 590 | 22.515 | -8.581  | -8.521  | 1.00 | 0.00 | A | N |
| ATOM | 3863 | CA  | GLY A 590 | 23.704 | -7.785  | -8.448  | 1.00 | 0.00 | A | C |
| ATOM | 3864 | C   | GLY A 590 | 23.476 | -6.633  | -7.521  | 1.00 | 0.00 | A | C |
| ATOM | 3865 | O   | GLY A 590 | 24.329 | -6.311  | -6.695  | 1.00 | 0.00 | A | O |
| ATOM | 3866 | N   | PHE A 591 | 22.307 | -5.976  | -7.624  | 1.00 | 0.00 | A | N |
| ATOM | 3867 | CA  | PHE A 591 | 22.052 | -4.841  | -6.790  | 1.00 | 0.00 | A | C |
| ATOM | 3868 | CB  | PHE A 591 | 20.758 | -4.089  | -7.130  | 1.00 | 0.00 | A | C |
| ATOM | 3869 | CG  | PHE A 591 | 21.080 | -3.169  | -8.258  | 1.00 | 0.00 | A | C |
| ATOM | 3870 | CD1 | PHE A 591 | 21.209 | -3.624  | -9.550  | 1.00 | 0.00 | A | C |
| ATOM | 3871 | CE1 | PHE A 591 | 21.501 | -2.753  | -10.573 | 1.00 | 0.00 | A | C |
| ATOM | 3872 | CZ  | PHE A 591 | 21.661 | -1.412  | -10.314 | 1.00 | 0.00 | A | C |
| ATOM | 3873 | CD2 | PHE A 591 | 21.236 | -1.825  | -8.010  | 1.00 | 0.00 | A | C |
| ATOM | 3874 | CE2 | PHE A 591 | 21.526 | -0.947  | -9.028  | 1.00 | 0.00 | A | C |
| ATOM | 3875 | C   | PHE A 591 | 22.009 | -5.265  | -5.359  | 1.00 | 0.00 | A | C |
| ATOM | 3876 | O   | PHE A 591 | 22.495 | -4.556  | -4.480  | 1.00 | 0.00 | A | O |
| ATOM | 3877 | N   | SER A 592 | 21.415 | -6.436  | -5.095  | 1.00 | 0.00 | A | N |
| ATOM | 3878 | CA  | SER A 592 | 21.303 | -6.950  | -3.764  | 1.00 | 0.00 | A | C |
| ATOM | 3879 | CB  | SER A 592 | 20.591 | -8.305  | -3.755  | 1.00 | 0.00 | A | C |
| ATOM | 3880 | OG  | SER A 592 | 20.568 | -8.814  | -2.436  | 1.00 | 0.00 | A | O |
| ATOM | 3881 | C   | SER A 592 | 22.675 | -7.161  | -3.199  | 1.00 | 0.00 | A | C |
| ATOM | 3882 | O   | SER A 592 | 22.939 | -6.813  | -2.048  | 1.00 | 0.00 | A | O |
| ATOM | 3883 | N   | THR A 593 | 23.593 | -7.730  | -4.000  | 1.00 | 0.00 | A | N |
| ATOM | 3884 | CA  | THR A 593 | 24.911 | -7.997  | -3.502  | 1.00 | 0.00 | A | C |
| ATOM | 3885 | CB  | THR A 593 | 25.794 | -8.712  | -4.481  | 1.00 | 0.00 | A | C |
| ATOM | 3886 | OG1 | THR A 593 | 26.045 | -7.905  | -5.621  | 1.00 | 0.00 | A | O |
| ATOM | 3887 | CG2 | THR A 593 | 25.083 | -10.006 | -4.890  | 1.00 | 0.00 | A | C |
| ATOM | 3888 | C   | THR A 593 | 25.564 | -6.695  | -3.180  | 1.00 | 0.00 | A | C |
| ATOM | 3889 | O   | THR A 593 | 26.253 | -6.574  | -2.170  | 1.00 | 0.00 | A | O |
| ATOM | 3890 | N   | ALA A 594 | 25.358 | -5.680  | -4.038  | 1.00 | 0.00 | A | N |
| ATOM | 3891 | CA  | ALA A 594 | 25.990 | -4.411  | -3.829  | 1.00 | 0.00 | A | C |
| ATOM | 3892 | CB  | ALA A 594 | 25.664 | -3.396  | -4.939  | 1.00 | 0.00 | A | C |
| ATOM | 3893 | C   | ALA A 594 | 25.514 | -3.832  | -2.532  | 1.00 | 0.00 | A | C |
| ATOM | 3894 | O   | ALA A 594 | 26.300 | -3.277  | -1.769  | 1.00 | 0.00 | A | O |

|      |      |     |           |        |        |        |      |      |   |   |
|------|------|-----|-----------|--------|--------|--------|------|------|---|---|
| ATOM | 3895 | N   | VAL A 595 | 24.202 | -3.941 | -2.248 | 1.00 | 0.00 | A | N |
| ATOM | 3896 | CA  | VAL A 595 | 23.654 | -3.377 | -1.046 | 1.00 | 0.00 | A | C |
| ATOM | 3897 | CB  | VAL A 595 | 22.155 | -3.475 | -0.962 | 1.00 | 0.00 | A | C |
| ATOM | 3898 | CG1 | VAL A 595 | 21.709 | -2.901 | 0.394  | 1.00 | 0.00 | A | C |
| ATOM | 3899 | CG2 | VAL A 595 | 21.537 | -2.760 | -2.176 | 1.00 | 0.00 | A | C |
| ATOM | 3900 | C   | VAL A 595 | 24.195 | -4.083 | 0.160  | 1.00 | 0.00 | A | C |
| ATOM | 3901 | O   | VAL A 595 | 24.507 | -3.451 | 1.166  | 1.00 | 0.00 | A | O |
| ATOM | 3902 | N   | VAL A 596 | 24.335 | -5.418 | 0.084  | 1.00 | 0.00 | A | N |
| ATOM | 3903 | CA  | VAL A 596 | 24.704 | -6.192 | 1.237  | 1.00 | 0.00 | A | C |
| ATOM | 3904 | CB  | VAL A 596 | 24.724 | -7.671 | 0.943  | 1.00 | 0.00 | A | C |
| ATOM | 3905 | CG1 | VAL A 596 | 25.980 | -8.033 | 0.135  | 1.00 | 0.00 | A | C |
| ATOM | 3906 | CG2 | VAL A 596 | 24.565 | -8.446 | 2.256  | 1.00 | 0.00 | A | C |
| ATOM | 3907 | C   | VAL A 596 | 26.042 | -5.739 | 1.744  | 1.00 | 0.00 | A | C |
| ATOM | 3908 | O   | VAL A 596 | 26.247 | -5.618 | 2.950  | 1.00 | 0.00 | A | O |
| ATOM | 3909 | N   | THR A 597 | 26.998 | -5.492 | 0.835  | 1.00 | 0.00 | A | N |
| ATOM | 3910 | CA  | THR A 597 | 28.311 | -5.055 | 1.220  | 1.00 | 0.00 | A | C |
| ATOM | 3911 | CB  | THR A 597 | 29.282 | -5.097 | 0.080  | 1.00 | 0.00 | A | C |
| ATOM | 3912 | OG1 | THR A 597 | 30.559 | -4.684 | 0.527  | 1.00 | 0.00 | A | O |
| ATOM | 3913 | CG2 | THR A 597 | 28.789 | -4.169 | -1.040 | 1.00 | 0.00 | A | C |
| ATOM | 3914 | C   | THR A 597 | 28.305 | -3.644 | 1.745  | 1.00 | 0.00 | A | C |
| ATOM | 3915 | O   | THR A 597 | 29.018 | -3.329 | 2.699  | 1.00 | 0.00 | A | O |
| ATOM | 3916 | N   | LEU A 598 | 27.489 | -2.756 | 1.146  | 1.00 | 0.00 | A | N |
| ATOM | 3917 | CA  | LEU A 598 | 27.554 | -1.343 | 1.420  | 1.00 | 0.00 | A | C |
| ATOM | 3918 | CB  | LEU A 598 | 26.505 | -0.556 | 0.613  | 1.00 | 0.00 | A | C |
| ATOM | 3919 | CG  | LEU A 598 | 26.651 | 0.973  | 0.702  | 1.00 | 0.00 | A | C |
| ATOM | 3920 | CD1 | LEU A 598 | 27.829 | 1.472  | -0.148 | 1.00 | 0.00 | A | C |
| ATOM | 3921 | CD2 | LEU A 598 | 25.337 | 1.690  | 0.370  | 1.00 | 0.00 | A | C |
| ATOM | 3922 | C   | LEU A 598 | 27.282 | -1.056 | 2.860  | 1.00 | 0.00 | A | C |
| ATOM | 3923 | O   | LEU A 598 | 28.018 | -0.305 | 3.500  | 1.00 | 0.00 | A | O |
| ATOM | 3924 | N   | ILE A 599 | 26.191 | -1.620 | 3.406  | 1.00 | 0.00 | A | N |
| ATOM | 3925 | CA  | ILE A 599 | 25.915 | -1.383 | 4.783  | 1.00 | 0.00 | A | C |
| ATOM | 3926 | CB  | ILE A 599 | 25.469 | 0.015  | 5.007  | 1.00 | 0.00 | A | C |
| ATOM | 3927 | CG2 | ILE A 599 | 24.380 | 0.383  | 3.991  | 1.00 | 0.00 | A | C |
| ATOM | 3928 | CG1 | ILE A 599 | 25.140 | 0.208  | 6.475  | 1.00 | 0.00 | A | C |
| ATOM | 3929 | CD  | ILE A 599 | 25.021 | 1.675  | 6.801  | 1.00 | 0.00 | A | C |
| ATOM | 3930 | C   | ILE A 599 | 24.895 | -2.372 | 5.259  | 1.00 | 0.00 | A | C |
| ATOM | 3931 | O   | ILE A 599 | 23.819 | -2.496 | 4.680  | 1.00 | 0.00 | A | O |
| ATOM | 3932 | N   | GLU A 600 | 25.210 | -3.099 | 6.350  | 1.00 | 0.00 | A | N |

|      |      |     |     |   |     |        |        |        |      |      |   |   |
|------|------|-----|-----|---|-----|--------|--------|--------|------|------|---|---|
| ATOM | 3933 | CA  | GLU | A | 600 | 24.325 | -4.116 | 6.844  | 1.00 | 0.00 | A | C |
| ATOM | 3934 | CB  | GLU | A | 600 | 24.943 | -4.939 | 7.993  | 1.00 | 0.00 | A | C |
| ATOM | 3935 | CG  | GLU | A | 600 | 25.421 | -4.122 | 9.194  | 1.00 | 0.00 | A | C |
| ATOM | 3936 | CD  | GLU | A | 600 | 24.281 | -3.952 | 10.185 | 1.00 | 0.00 | A | C |
| ATOM | 3937 | OE1 | GLU | A | 600 | 23.745 | -4.989 | 10.661 | 1.00 | 0.00 | A | O |
| ATOM | 3938 | OE2 | GLU | A | 600 | 23.944 | -2.779 | 10.489 | 1.00 | 0.00 | A | O |
| ATOM | 3939 | C   | GLU | A | 600 | 23.049 | -3.485 | 7.299  | 1.00 | 0.00 | A | C |
| ATOM | 3940 | O   | GLU | A | 600 | 21.969 | -3.975 | 6.971  | 1.00 | 0.00 | A | O |
| ATOM | 3941 | N   | ASP | A | 601 | 23.141 | -2.357 | 8.029  | 1.00 | 0.00 | A | N |
| ATOM | 3942 | CA  | ASP | A | 601 | 21.965 | -1.674 | 8.486  | 1.00 | 0.00 | A | C |
| ATOM | 3943 | CB  | ASP | A | 601 | 21.112 | -1.125 | 7.339  | 1.00 | 0.00 | A | C |
| ATOM | 3944 | CG  | ASP | A | 601 | 21.943 | -0.102 | 6.602  | 1.00 | 0.00 | A | C |
| ATOM | 3945 | OD1 | ASP | A | 601 | 22.447 | 0.845  | 7.263  | 1.00 | 0.00 | A | O |
| ATOM | 3946 | OD2 | ASP | A | 601 | 22.104 | -0.267 | 5.363  | 1.00 | 0.00 | A | O |
| ATOM | 3947 | C   | ASP | A | 601 | 21.094 | -2.644 | 9.194  | 1.00 | 0.00 | A | C |
| ATOM | 3948 | O   | ASP | A | 601 | 21.553 | -3.467 | 9.988  | 1.00 | 0.00 | A | O |
| ATOM | 3949 | N   | GLY | A | 602 | 19.775 | -2.539 | 8.943  | 1.00 | 0.00 | A | N |
| ATOM | 3950 | CA  | GLY | A | 602 | 18.893 | -3.485 | 9.541  | 1.00 | 0.00 | A | C |
| ATOM | 3951 | C   | GLY | A | 602 | 17.935 | -3.940 | 8.488  | 1.00 | 0.00 | A | C |
| ATOM | 3952 | O   | GLY | A | 602 | 17.393 | -3.109 | 7.762  | 1.00 | 0.00 | A | O |
| ATOM | 3953 | N   | LYS | A | 603 | 17.737 | -5.280 | 8.396  | 1.00 | 0.00 | A | N |
| ATOM | 3954 | CA  | LYS | A | 603 | 16.779 | -5.952 | 7.544  | 1.00 | 0.00 | A | C |
| ATOM | 3955 | CB  | LYS | A | 603 | 16.150 | -5.104 | 6.432  | 1.00 | 0.00 | A | C |
| ATOM | 3956 | CG  | LYS | A | 603 | 14.937 | -5.732 | 5.761  | 1.00 | 0.00 | A | C |
| ATOM | 3957 | CD  | LYS | A | 603 | 14.144 | -4.650 | 5.050  | 1.00 | 0.00 | A | C |
| ATOM | 3958 | CE  | LYS | A | 603 | 14.054 | -3.389 | 5.914  | 1.00 | 0.00 | A | C |
| ATOM | 3959 | NZ  | LYS | A | 603 | 13.402 | -2.295 | 5.168  | 1.00 | 0.00 | A | N |
| ATOM | 3960 | C   | LYS | A | 603 | 17.362 | -7.158 | 6.828  | 1.00 | 0.00 | A | C |
| ATOM | 3961 | O   | LYS | A | 603 | 17.323 | -7.117 | 5.565  | 1.00 | 0.00 | A | O |
| ATOM | 3962 | N   | TYR | B | 628 | 19.007 | -4.991 | 5.906  | 1.00 | 0.00 | A | N |
| ATOM | 3963 | CA  | TYR | B | 628 | 19.672 | -5.573 | 4.725  | 1.00 | 0.00 | A | C |
| ATOM | 3964 | CB  | TYR | B | 628 | 20.244 | -4.448 | 3.861  | 1.00 | 0.00 | A | C |
| ATOM | 3965 | CG  | TYR | B | 628 | 19.108 | -3.694 | 3.273  | 1.00 | 0.00 | A | C |
| ATOM | 3966 | CD1 | TYR | B | 628 | 18.413 | -2.767 | 4.016  | 1.00 | 0.00 | A | C |
| ATOM | 3967 | CE1 | TYR | B | 628 | 17.368 | -2.069 | 3.458  | 1.00 | 0.00 | A | C |
| ATOM | 3968 | CZ  | TYR | B | 628 | 17.014 | -2.294 | 2.148  | 1.00 | 0.00 | A | C |
| ATOM | 3969 | OH  | TYR | B | 628 | 15.942 | -1.577 | 1.575  | 1.00 | 0.00 | A | O |
| ATOM | 3970 | CD2 | TYR | B | 628 | 18.747 | -3.912 | 1.965  | 1.00 | 0.00 | A | C |

|      |      |               |        |         |        |      |      |   |   |
|------|------|---------------|--------|---------|--------|------|------|---|---|
| ATOM | 3971 | CE2 TYR B 628 | 17.705 | -3.218  | 1.402  | 1.00 | 0.00 | A | C |
| ATOM | 3972 | C TYR B 628   | 20.801 | -6.503  | 5.039  | 1.00 | 0.00 | A | C |
| ATOM | 3973 | O TYR B 628   | 21.624 | -6.802  | 4.175  | 1.00 | 0.00 | A | O |
| ATOM | 3974 | N ASN B 629   | 20.865 | -6.999  | 6.286  | 1.00 | 0.00 | A | N |
| ATOM | 3975 | CA ASN B 629  | 21.937 | -7.861  | 6.678  | 1.00 | 0.00 | A | C |
| ATOM | 3976 | CB ASN B 629  | 21.846 | -8.278  | 8.154  | 1.00 | 0.00 | A | C |
| ATOM | 3977 | CG ASN B 629  | 21.977 | -7.027  | 9.002  | 1.00 | 0.00 | A | C |
| ATOM | 3978 | OD1 ASN B 629 | 22.338 | -5.958  | 8.511  | 1.00 | 0.00 | A | O |
| ATOM | 3979 | ND2 ASN B 629 | 21.675 | -7.162  | 10.321 | 1.00 | 0.00 | A | N |
| ATOM | 3980 | C ASN B 629   | 21.884 | -9.121  | 5.866  | 1.00 | 0.00 | A | C |
| ATOM | 3981 | O ASN B 629   | 22.916 | -9.614  | 5.413  | 1.00 | 0.00 | A | O |
| ATOM | 3982 | N SER B 630   | 20.672 | -9.668  | 5.649  | 1.00 | 0.00 | A | N |
| ATOM | 3983 | CA SER B 630  | 20.555 | -10.923 | 4.954  | 1.00 | 0.00 | A | C |
| ATOM | 3984 | CB SER B 630  | 19.447 | -11.837 | 5.510  | 1.00 | 0.00 | A | C |
| ATOM | 3985 | OG SER B 630  | 19.386 | -13.045 | 4.765  | 1.00 | 0.00 | A | O |
| ATOM | 3986 | C SER B 630   | 20.233 | -10.683 | 3.516  | 1.00 | 0.00 | A | C |
| ATOM | 3987 | O SER B 630   | 19.574 | -9.712  | 3.158  | 1.00 | 0.00 | A | O |
| ATOM | 3988 | N LEU B 631   | 20.761 | -11.575 | 2.651  | 1.00 | 0.00 | A | N |
| ATOM | 3989 | CA LEU B 631  | 20.538 | -11.548 | 1.234  | 1.00 | 0.00 | A | C |
| ATOM | 3990 | CB LEU B 631  | 21.416 | -12.570 | 0.494  | 1.00 | 0.00 | A | C |
| ATOM | 3991 | CG LEU B 631  | 21.224 | -12.564 | -1.032 | 1.00 | 0.00 | A | C |
| ATOM | 3992 | CD1 LEU B 631 | 21.689 | -11.232 | -1.640 | 1.00 | 0.00 | A | C |
| ATOM | 3993 | CD2 LEU B 631 | 21.901 | -13.776 | -1.690 | 1.00 | 0.00 | A | C |
| ATOM | 3994 | C LEU B 631   | 19.105 | -11.894 | 0.952  | 1.00 | 0.00 | A | C |
| ATOM | 3995 | O LEU B 631   | 18.454 | -11.262 | 0.121  | 1.00 | 0.00 | A | O |
| ATOM | 3996 | N TYR B 632   | 18.566 | -12.910 | 1.656  | 1.00 | 0.00 | A | N |
| ATOM | 3997 | CA TYR B 632  | 17.218 | -13.341 | 1.413  | 1.00 | 0.00 | A | C |
| ATOM | 3998 | CB TYR B 632  | 16.809 | -14.543 | 2.285  | 1.00 | 0.00 | A | C |
| ATOM | 3999 | CG TYR B 632  | 15.341 | -14.752 | 2.124  | 1.00 | 0.00 | A | C |
| ATOM | 4000 | CD1 TYR B 632 | 14.829 | -15.333 | 0.988  | 1.00 | 0.00 | A | C |
| ATOM | 4001 | CE1 TYR B 632 | 13.474 | -15.527 | 0.848  | 1.00 | 0.00 | A | C |
| ATOM | 4002 | CZ TYR B 632  | 12.616 | -15.140 | 1.850  | 1.00 | 0.00 | A | C |
| ATOM | 4003 | OH TYR B 632  | 11.226 | -15.338 | 1.711  | 1.00 | 0.00 | A | O |
| ATOM | 4004 | CD2 TYR B 632 | 14.473 | -14.371 | 3.123  | 1.00 | 0.00 | A | C |
| ATOM | 4005 | CE2 TYR B 632 | 13.117 | -14.562 | 2.989  | 1.00 | 0.00 | A | C |
| ATOM | 4006 | C TYR B 632   | 16.286 | -12.217 | 1.720  | 1.00 | 0.00 | A | C |
| ATOM | 4007 | O TYR B 632   | 15.359 | -11.946 | 0.957  | 1.00 | 0.00 | A | O |
| ATOM | 4008 | N SER B 633   | 16.496 | -11.539 | 2.861  | 1.00 | 0.00 | A | N |

|      |      |     |           |        |         |        |      |      |   |   |
|------|------|-----|-----------|--------|---------|--------|------|------|---|---|
| ATOM | 4009 | CA  | SER B 633 | 15.652 | -10.445 | 3.250  | 1.00 | 0.00 | A | C |
| ATOM | 4010 | CB  | SER B 633 | 15.932 | -9.980  | 4.688  | 1.00 | 0.00 | A | C |
| ATOM | 4011 | OG  | SER B 633 | 17.286 | -9.577  | 4.806  | 1.00 | 0.00 | A | O |
| ATOM | 4012 | C   | SER B 633 | 15.853 | -9.271  | 2.334  | 1.00 | 0.00 | A | C |
| ATOM | 4013 | O   | SER B 633 | 14.886 | -8.649  | 1.896  | 1.00 | 0.00 | A | O |
| ATOM | 4014 | N   | THR B 634 | 17.118 | -8.944  | 2.004  | 1.00 | 0.00 | A | N |
| ATOM | 4015 | CA  | THR B 634 | 17.396 | -7.800  | 1.179  | 1.00 | 0.00 | A | C |
| ATOM | 4016 | CB  | THR B 634 | 18.859 | -7.549  | 0.934  | 1.00 | 0.00 | A | C |
| ATOM | 4017 | OG1 | THR B 634 | 19.475 | -8.702  | 0.382  | 1.00 | 0.00 | A | O |
| ATOM | 4018 | CG2 | THR B 634 | 19.544 | -7.132  | 2.238  | 1.00 | 0.00 | A | C |
| ATOM | 4019 | C   | THR B 634 | 16.778 | -7.990  | -0.165 | 1.00 | 0.00 | A | C |
| ATOM | 4020 | O   | THR B 634 | 16.243 | -7.049  | -0.746 | 1.00 | 0.00 | A | O |
| ATOM | 4021 | N   | CYS B 635 | 16.847 | -9.220  | -0.706 | 1.00 | 0.00 | A | N |
| ATOM | 4022 | CA  | CYS B 635 | 16.299 | -9.465  | -2.007 | 1.00 | 0.00 | A | C |
| ATOM | 4023 | CB  | CYS B 635 | 16.484 | -10.922 | -2.470 | 1.00 | 0.00 | A | C |
| ATOM | 4024 | SG  | CYS B 635 | 15.785 | -11.228 | -4.121 | 1.00 | 0.00 | A | S |
| ATOM | 4025 | C   | CYS B 635 | 14.834 | -9.191  | -1.945 | 1.00 | 0.00 | A | C |
| ATOM | 4026 | O   | CYS B 635 | 14.271 | -8.566  | -2.842 | 1.00 | 0.00 | A | O |
| ATOM | 4027 | N   | LEU B 636 | 14.176 | -9.642  | -0.860 | 1.00 | 0.00 | A | N |
| ATOM | 4028 | CA  | LEU B 636 | 12.764 | -9.432  | -0.732 | 1.00 | 0.00 | A | C |
| ATOM | 4029 | CB  | LEU B 636 | 12.153 | -10.080 | 0.521  | 1.00 | 0.00 | A | C |
| ATOM | 4030 | CG  | LEU B 636 | 12.148 | -11.616 | 0.467  | 1.00 | 0.00 | A | C |
| ATOM | 4031 | CD1 | LEU B 636 | 11.475 | -12.215 | 1.712  | 1.00 | 0.00 | A | C |
| ATOM | 4032 | CD2 | LEU B 636 | 11.538 | -12.125 | -0.852 | 1.00 | 0.00 | A | C |
| ATOM | 4033 | C   | LEU B 636 | 12.517 | -7.964  | -0.655 | 1.00 | 0.00 | A | C |
| ATOM | 4034 | O   | LEU B 636 | 11.545 | -7.459  | -1.216 | 1.00 | 0.00 | A | O |
| ATOM | 4035 | N   | GLU B 637 | 13.396 | -7.235  | 0.051  | 1.00 | 0.00 | A | N |
| ATOM | 4036 | CA  | GLU B 637 | 13.211 | -5.825  | 0.200  | 1.00 | 0.00 | A | C |
| ATOM | 4037 | CB  | GLU B 637 | 14.282 | -5.197  | 1.108  | 1.00 | 0.00 | A | C |
| ATOM | 4038 | CG  | GLU B 637 | 13.780 | -4.007  | 1.931  | 1.00 | 0.00 | A | C |
| ATOM | 4039 | CD  | GLU B 637 | 13.090 | -3.016  | 1.013  | 1.00 | 0.00 | A | C |
| ATOM | 4040 | OE1 | GLU B 637 | 13.758 | -2.518  | 0.068  | 1.00 | 0.00 | A | O |
| ATOM | 4041 | OE2 | GLU B 637 | 11.883 | -2.746  | 1.246  | 1.00 | 0.00 | A | O |
| ATOM | 4042 | C   | GLU B 637 | 13.321 | -5.204  | -1.165 | 1.00 | 0.00 | A | C |
| ATOM | 4043 | O   | GLU B 637 | 12.552 | -4.308  | -1.509 | 1.00 | 0.00 | A | O |
| ATOM | 4044 | N   | LEU B 638 | 14.293 | -5.670  | -1.977 | 1.00 | 0.00 | A | N |
| ATOM | 4045 | CA  | LEU B 638 | 14.533 | -5.153  | -3.302 | 1.00 | 0.00 | A | C |
| ATOM | 4046 | CB  | LEU B 638 | 15.787 | -5.739  | -3.974 | 1.00 | 0.00 | A | C |

|      |      |     |           |        |        |        |      |      |   |   |
|------|------|-----|-----------|--------|--------|--------|------|------|---|---|
| ATOM | 4047 | CG  | LEU B 638 | 17.113 | -5.336 | -3.307 | 1.00 | 0.00 | A | C |
| ATOM | 4048 | CD1 | LEU B 638 | 18.311 | -5.876 | -4.105 | 1.00 | 0.00 | A | C |
| ATOM | 4049 | CD2 | LEU B 638 | 17.182 | -3.818 | -3.075 | 1.00 | 0.00 | A | C |
| ATOM | 4050 | C   | LEU B 638 | 13.389 | -5.464 | -4.216 | 1.00 | 0.00 | A | C |
| ATOM | 4051 | O   | LEU B 638 | 12.982 | -4.626 | -5.018 | 1.00 | 0.00 | A | O |
| ATOM | 4052 | N   | PHE B 639 | 12.843 | -6.688 | -4.115 | 1.00 | 0.00 | A | N |
| ATOM | 4053 | CA  | PHE B 639 | 11.783 | -7.136 | -4.975 | 1.00 | 0.00 | A | C |
| ATOM | 4054 | CB  | PHE B 639 | 11.369 | -8.590 | -4.688 | 1.00 | 0.00 | A | C |
| ATOM | 4055 | CG  | PHE B 639 | 10.277 | -8.957 | -5.633 | 1.00 | 0.00 | A | C |
| ATOM | 4056 | CD1 | PHE B 639 | 10.580 | -9.400 | -6.900 | 1.00 | 0.00 | A | C |
| ATOM | 4057 | CE1 | PHE B 639 | 9.584  | -9.740 | -7.785 | 1.00 | 0.00 | A | C |
| ATOM | 4058 | CZ  | PHE B 639 | 8.267  | -9.641 | -7.411 | 1.00 | 0.00 | A | C |
| ATOM | 4059 | CD2 | PHE B 639 | 8.956  | -8.853 | -5.268 | 1.00 | 0.00 | A | C |
| ATOM | 4060 | CE2 | PHE B 639 | 7.957  | -9.195 | -6.151 | 1.00 | 0.00 | A | C |
| ATOM | 4061 | C   | PHE B 639 | 10.602 | -6.254 | -4.741 | 1.00 | 0.00 | A | C |
| ATOM | 4062 | O   | PHE B 639 | 9.869  | -5.918 | -5.672 | 1.00 | 0.00 | A | O |
| ATOM | 4063 | N   | LYS B 640 | 10.394 | -5.844 | -3.476 | 1.00 | 0.00 | A | N |
| ATOM | 4064 | CA  | LYS B 640 | 9.278  | -5.014 | -3.125 | 1.00 | 0.00 | A | C |
| ATOM | 4065 | CB  | LYS B 640 | 9.339  | -4.526 | -1.667 | 1.00 | 0.00 | A | C |
| ATOM | 4066 | CG  | LYS B 640 | 9.322  | -5.631 | -0.611 | 1.00 | 0.00 | A | C |
| ATOM | 4067 | CD  | LYS B 640 | 9.759  | -5.127 | 0.767  | 1.00 | 0.00 | A | C |
| ATOM | 4068 | CE  | LYS B 640 | 9.760  | -6.196 | 1.860  | 1.00 | 0.00 | A | C |
| ATOM | 4069 | NZ  | LYS B 640 | 10.329 | -5.631 | 3.104  | 1.00 | 0.00 | A | N |
| ATOM | 4070 | C   | LYS B 640 | 9.379  | -3.775 | -3.949 | 1.00 | 0.00 | A | C |
| ATOM | 4071 | O   | LYS B 640 | 8.384  | -3.285 | -4.481 | 1.00 | 0.00 | A | O |
| ATOM | 4072 | N   | PHE B 641 | 10.603 | -3.235 | -4.071 | 1.00 | 0.00 | A | N |
| ATOM | 4073 | CA  | PHE B 641 | 10.815 | -2.032 | -4.820 | 1.00 | 0.00 | A | C |
| ATOM | 4074 | CB  | PHE B 641 | 12.246 | -1.475 | -4.711 | 1.00 | 0.00 | A | C |
| ATOM | 4075 | CG  | PHE B 641 | 12.279 | -0.625 | -3.491 | 1.00 | 0.00 | A | C |
| ATOM | 4076 | CD1 | PHE B 641 | 11.965 | 0.712  | -3.587 | 1.00 | 0.00 | A | C |
| ATOM | 4077 | CE1 | PHE B 641 | 11.984 | 1.519  | -2.479 | 1.00 | 0.00 | A | C |
| ATOM | 4078 | CZ  | PHE B 641 | 12.313 | 0.998  | -1.254 | 1.00 | 0.00 | A | C |
| ATOM | 4079 | CD2 | PHE B 641 | 12.604 | -1.146 | -2.261 | 1.00 | 0.00 | A | C |
| ATOM | 4080 | CE2 | PHE B 641 | 12.623 | -0.336 | -1.148 | 1.00 | 0.00 | A | C |
| ATOM | 4081 | C   | PHE B 641 | 10.498 | -2.236 | -6.269 | 1.00 | 0.00 | A | C |
| ATOM | 4082 | O   | PHE B 641 | 9.910  | -1.359 | -6.903 | 1.00 | 0.00 | A | O |
| ATOM | 4083 | N   | THR B 642 | 10.882 | -3.390 | -6.843 | 1.00 | 0.00 | A | N |
| ATOM | 4084 | CA  | THR B 642 | 10.658 | -3.622 | -8.244 | 1.00 | 0.00 | A | C |



|      |      |     |           |        |        |        |      |      |   |   |
|------|------|-----|-----------|--------|--------|--------|------|------|---|---|
| ATOM | 4085 | CB  | THR B 642 | 11.308 | -4.880 | -8.731 | 1.00 | 0.00 | A | C |
| ATOM | 4086 | OG1 | THR B 642 | 10.704 | -6.030 | -8.163 | 1.00 | 0.00 | A | O |
| ATOM | 4087 | CG2 | THR B 642 | 12.775 | -4.806 | -8.291 | 1.00 | 0.00 | A | C |
| ATOM | 4088 | C   | THR B 642 | 9.185  | -3.679 | -8.512 | 1.00 | 0.00 | A | C |
| ATOM | 4089 | O   | THR B 642 | 8.709  | -3.212 | -9.545 | 1.00 | 0.00 | A | O |
| ATOM | 4090 | N   | ILE B 643 | 8.429  | -4.247 | -7.556 | 1.00 | 0.00 | A | N |
| ATOM | 4091 | CA  | ILE B 643 | 7.002  | -4.380 | -7.621 | 1.00 | 0.00 | A | C |
| ATOM | 4092 | CB  | ILE B 643 | 6.428  | -4.990 | -6.371 | 1.00 | 0.00 | A | C |
| ATOM | 4093 | CG2 | ILE B 643 | 4.896  | -4.987 | -6.499 | 1.00 | 0.00 | A | C |
| ATOM | 4094 | CG1 | ILE B 643 | 7.014  | -6.389 | -6.126 | 1.00 | 0.00 | A | C |
| ATOM | 4095 | CD  | ILE B 643 | 6.723  | -6.931 | -4.725 | 1.00 | 0.00 | A | C |
| ATOM | 4096 | C   | ILE B 643 | 6.443  | -2.995 | -7.719 | 1.00 | 0.00 | A | C |
| ATOM | 4097 | O   | ILE B 643 | 5.410  | -2.773 | -8.347 | 1.00 | 0.00 | A | O |
| ATOM | 4098 | N   | GLY B 644 | 7.112  | -2.018 | -7.072 | 1.00 | 0.00 | A | N |
| ATOM | 4099 | CA  | GLY B 644 | 6.645  | -0.664 | -7.126 | 1.00 | 0.00 | A | C |
| ATOM | 4100 | C   | GLY B 644 | 6.137  | -0.239 | -5.788 | 1.00 | 0.00 | A | C |
| ATOM | 4101 | O   | GLY B 644 | 5.711  | 0.902  | -5.617 | 1.00 | 0.00 | A | O |
| ATOM | 4102 | N   | MET B 645 | 6.147  | -1.147 | -4.796 | 1.00 | 0.00 | A | N |
| ATOM | 4103 | CA  | MET B 645 | 5.716  | -0.737 | -3.493 | 1.00 | 0.00 | A | C |
| ATOM | 4104 | CB  | MET B 645 | 4.723  | -1.725 | -2.857 | 1.00 | 0.00 | A | C |
| ATOM | 4105 | CG  | MET B 645 | 5.260  | -3.154 | -2.774 | 1.00 | 0.00 | A | C |
| ATOM | 4106 | SD  | MET B 645 | 4.073  | -4.359 | -2.111 | 1.00 | 0.00 | A | S |
| ATOM | 4107 | CE  | MET B 645 | 2.951  | -4.233 | -3.532 | 1.00 | 0.00 | A | C |
| ATOM | 4108 | C   | MET B 645 | 6.933  | -0.654 | -2.629 | 1.00 | 0.00 | A | C |
| ATOM | 4109 | O   | MET B 645 | 7.687  | -1.619 | -2.510 | 1.00 | 0.00 | A | O |
| ATOM | 4110 | N   | GLY B 646 | 7.164  | 0.518  | -2.004 | 1.00 | 0.00 | A | N |
| ATOM | 4111 | CA  | GLY B 646 | 8.326  | 0.644  | -1.170 | 1.00 | 0.00 | A | C |
| ATOM | 4112 | C   | GLY B 646 | 8.244  | 1.917  | -0.387 | 1.00 | 0.00 | A | C |
| ATOM | 4113 | O   | GLY B 646 | 7.496  | 2.835  | -0.722 | 1.00 | 0.00 | A | O |
| ATOM | 4114 | N   | ASP B 647 | 9.030  | 1.982  | 0.707  | 1.00 | 0.00 | A | N |
| ATOM | 4115 | CA  | ASP B 647 | 9.115  | 3.157  | 1.529  | 1.00 | 0.00 | A | C |
| ATOM | 4116 | CB  | ASP B 647 | 9.051  | 2.856  | 3.031  | 1.00 | 0.00 | A | C |
| ATOM | 4117 | CG  | ASP B 647 | 7.703  | 2.262  | 3.399  | 1.00 | 0.00 | A | C |
| ATOM | 4118 | OD1 | ASP B 647 | 6.720  | 2.484  | 2.644  | 1.00 | 0.00 | A | O |
| ATOM | 4119 | OD2 | ASP B 647 | 7.646  | 1.565  | 4.449  | 1.00 | 0.00 | A | O |
| ATOM | 4120 | C   | ASP B 647 | 10.476 | 3.713  | 1.253  | 1.00 | 0.00 | A | C |
| ATOM | 4121 | O   | ASP B 647 | 11.469 | 2.991  | 1.320  | 1.00 | 0.00 | A | O |
| ATOM | 4122 | N   | LEU B 648 | 10.577 | 5.021  | 0.942  | 1.00 | 0.00 | A | N |

|      |      |     |           |        |       |        |      |      |   |   |
|------|------|-----|-----------|--------|-------|--------|------|------|---|---|
| ATOM | 4123 | CA  | LEU B 648 | 11.858 | 5.508 | 0.515  | 1.00 | 0.00 | A | C |
| ATOM | 4124 | CB  | LEU B 648 | 11.829 | 6.283 | -0.816 | 1.00 | 0.00 | A | C |
| ATOM | 4125 | CG  | LEU B 648 | 11.531 | 5.429 | -2.062 | 1.00 | 0.00 | A | C |
| ATOM | 4126 | CD1 | LEU B 648 | 12.632 | 4.387 | -2.289 | 1.00 | 0.00 | A | C |
| ATOM | 4127 | CD2 | LEU B 648 | 10.120 | 4.825 | -2.022 | 1.00 | 0.00 | A | C |
| ATOM | 4128 | C   | LEU B 648 | 12.502 | 6.428 | 1.505  | 1.00 | 0.00 | A | C |
| ATOM | 4129 | O   | LEU B 648 | 11.859 | 7.072 | 2.331  | 1.00 | 0.00 | A | O |
| ATOM | 4130 | N   | GLU B 649 | 13.848 | 6.464 | 1.414  | 1.00 | 0.00 | A | N |
| ATOM | 4131 | CA  | GLU B 649 | 14.735 | 7.355 | 2.104  | 1.00 | 0.00 | A | C |
| ATOM | 4132 | CB  | GLU B 649 | 14.600 | 8.816 | 1.638  | 1.00 | 0.00 | A | C |
| ATOM | 4133 | CG  | GLU B 649 | 15.017 | 9.043 | 0.185  | 1.00 | 0.00 | A | C |
| ATOM | 4134 | CD  | GLU B 649 | 16.521 | 8.849 | 0.099  | 1.00 | 0.00 | A | C |
| ATOM | 4135 | OE1 | GLU B 649 | 16.954 | 7.675 | -0.057 | 1.00 | 0.00 | A | O |
| ATOM | 4136 | OE2 | GLU B 649 | 17.254 | 9.868 | 0.195  | 1.00 | 0.00 | A | O |
| ATOM | 4137 | C   | GLU B 649 | 14.545 | 7.355 | 3.588  | 1.00 | 0.00 | A | C |
| ATOM | 4138 | O   | GLU B 649 | 14.590 | 8.423 | 4.197  | 1.00 | 0.00 | A | O |
| ATOM | 4139 | N   | PHE B 650 | 14.356 | 6.184 | 4.231  | 1.00 | 0.00 | A | N |
| ATOM | 4140 | CA  | PHE B 650 | 14.274 | 6.242 | 5.668  | 1.00 | 0.00 | A | C |
| ATOM | 4141 | CB  | PHE B 650 | 14.148 | 4.886 | 6.379  | 1.00 | 0.00 | A | C |
| ATOM | 4142 | CG  | PHE B 650 | 12.794 | 4.318 | 6.177  | 1.00 | 0.00 | A | C |
| ATOM | 4143 | CD1 | PHE B 650 | 12.544 | 3.523 | 5.089  | 1.00 | 0.00 | A | C |
| ATOM | 4144 | CE1 | PHE B 650 | 11.296 | 2.989 | 4.907  | 1.00 | 0.00 | A | C |
| ATOM | 4145 | CZ  | PHE B 650 | 10.286 | 3.241 | 5.804  | 1.00 | 0.00 | A | C |
| ATOM | 4146 | CD2 | PHE B 650 | 11.785 | 4.570 | 7.079  | 1.00 | 0.00 | A | C |
| ATOM | 4147 | CE2 | PHE B 650 | 10.532 | 4.037 | 6.895  | 1.00 | 0.00 | A | C |
| ATOM | 4148 | C   | PHE B 650 | 15.593 | 6.765 | 6.137  | 1.00 | 0.00 | A | C |
| ATOM | 4149 | O   | PHE B 650 | 15.669 | 7.686 | 6.948  | 1.00 | 0.00 | A | O |
| ATOM | 4150 | N   | THR B 651 | 16.673 | 6.153 | 5.622  | 1.00 | 0.00 | A | N |
| ATOM | 4151 | CA  | THR B 651 | 18.016 | 6.577 | 5.888  | 1.00 | 0.00 | A | C |
| ATOM | 4152 | CB  | THR B 651 | 18.145 | 8.065 | 5.754  | 1.00 | 0.00 | A | C |
| ATOM | 4153 | OG1 | THR B 651 | 17.788 | 8.470 | 4.445  | 1.00 | 0.00 | A | O |
| ATOM | 4154 | CG2 | THR B 651 | 19.580 | 8.503 | 6.100  | 1.00 | 0.00 | A | C |
| ATOM | 4155 | C   | THR B 651 | 18.430 | 6.250 | 7.286  | 1.00 | 0.00 | A | C |
| ATOM | 4156 | O   | THR B 651 | 19.628 | 6.181 | 7.558  | 1.00 | 0.00 | A | O |
| ATOM | 4157 | N   | GLU B 652 | 17.493 | 5.877 | 8.168  | 1.00 | 0.00 | A | N |
| ATOM | 4158 | CA  | GLU B 652 | 17.884 | 5.726 | 9.540  | 1.00 | 0.00 | A | C |
| ATOM | 4159 | CB  | GLU B 652 | 16.712 | 5.359 | 10.447 | 1.00 | 0.00 | A | C |
| ATOM | 4160 | CG  | GLU B 652 | 15.590 | 6.385 | 10.365 | 1.00 | 0.00 | A | C |

|      |      |     |           |        |       |        |      |      |   |   |
|------|------|-----|-----------|--------|-------|--------|------|------|---|---|
| ATOM | 4161 | CD  | GLU B 652 | 14.513 | 5.912 | 11.311 | 1.00 | 0.00 | A | C |
| ATOM | 4162 | OE1 | GLU B 652 | 14.634 | 6.247 | 12.517 | 1.00 | 0.00 | A | O |
| ATOM | 4163 | OE2 | GLU B 652 | 13.572 | 5.206 | 10.858 | 1.00 | 0.00 | A | O |
| ATOM | 4164 | C   | GLU B 652 | 18.907 | 4.647 | 9.675  | 1.00 | 0.00 | A | C |
| ATOM | 4165 | O   | GLU B 652 | 18.746 | 3.548 | 9.148  | 1.00 | 0.00 | A | O |
| ATOM | 4166 | N   | ASN B 653 | 19.985 | 4.954 | 10.426 | 1.00 | 0.00 | A | N |
| ATOM | 4167 | CA  | ASN B 653 | 21.070 | 4.039 | 10.649 | 1.00 | 0.00 | A | C |
| ATOM | 4168 | CB  | ASN B 653 | 20.585 | 2.713 | 11.237 | 1.00 | 0.00 | A | C |
| ATOM | 4169 | CG  | ASN B 653 | 19.787 | 3.078 | 12.466 | 1.00 | 0.00 | A | C |
| ATOM | 4170 | OD1 | ASN B 653 | 20.334 | 3.364 | 13.525 | 1.00 | 0.00 | A | O |
| ATOM | 4171 | ND2 | ASN B 653 | 18.437 | 3.099 | 12.298 | 1.00 | 0.00 | A | N |
| ATOM | 4172 | C   | ASN B 653 | 21.729 | 3.700 | 9.349  | 1.00 | 0.00 | A | C |
| ATOM | 4173 | O   | ASN B 653 | 22.140 | 2.558 | 9.142  | 1.00 | 0.00 | A | O |
| ATOM | 4174 | N   | TYR B 654 | 21.875 | 4.681 | 8.439  | 1.00 | 0.00 | A | N |
| ATOM | 4175 | CA  | TYR B 654 | 22.486 | 4.366 | 7.177  | 1.00 | 0.00 | A | C |
| ATOM | 4176 | CB  | TYR B 654 | 21.598 | 4.634 | 5.943  | 1.00 | 0.00 | A | C |
| ATOM | 4177 | CG  | TYR B 654 | 20.587 | 3.543 | 5.787  | 1.00 | 0.00 | A | C |
| ATOM | 4178 | CD1 | TYR B 654 | 20.898 | 2.391 | 5.109  | 1.00 | 0.00 | A | C |
| ATOM | 4179 | CE1 | TYR B 654 | 19.965 | 1.392 | 4.961  | 1.00 | 0.00 | A | C |
| ATOM | 4180 | CZ  | TYR B 654 | 18.703 | 1.529 | 5.487  | 1.00 | 0.00 | A | C |
| ATOM | 4181 | OH  | TYR B 654 | 17.751 | 0.499 | 5.329  | 1.00 | 0.00 | A | O |
| ATOM | 4182 | CD2 | TYR B 654 | 19.322 | 3.656 | 6.304  | 1.00 | 0.00 | A | C |
| ATOM | 4183 | CE2 | TYR B 654 | 18.375 | 2.671 | 6.168  | 1.00 | 0.00 | A | C |
| ATOM | 4184 | C   | TYR B 654 | 23.747 | 5.151 | 6.990  | 1.00 | 0.00 | A | C |
| ATOM | 4185 | O   | TYR B 654 | 23.823 | 6.346 | 7.274  | 1.00 | 0.00 | A | O |
| ATOM | 4186 | N   | ASP B 655 | 24.783 | 4.450 | 6.495  | 1.00 | 0.00 | A | N |
| ATOM | 4187 | CA  | ASP B 655 | 26.079 | 4.994 | 6.237  | 1.00 | 0.00 | A | C |
| ATOM | 4188 | CB  | ASP B 655 | 27.239 | 4.080 | 6.651  | 1.00 | 0.00 | A | C |
| ATOM | 4189 | CG  | ASP B 655 | 27.272 | 4.053 | 8.168  | 1.00 | 0.00 | A | C |
| ATOM | 4190 | OD1 | ASP B 655 | 26.297 | 4.551 | 8.791  | 1.00 | 0.00 | A | O |
| ATOM | 4191 | OD2 | ASP B 655 | 28.279 | 3.544 | 8.722  | 1.00 | 0.00 | A | O |
| ATOM | 4192 | C   | ASP B 655 | 26.191 | 5.180 | 4.772  | 1.00 | 0.00 | A | C |
| ATOM | 4193 | O   | ASP B 655 | 25.732 | 4.352 | 3.984  | 1.00 | 0.00 | A | O |
| ATOM | 4194 | N   | PHE B 656 | 26.860 | 6.273 | 4.372  | 1.00 | 0.00 | A | N |
| ATOM | 4195 | CA  | PHE B 656 | 26.953 | 6.560 | 2.983  | 1.00 | 0.00 | A | C |
| ATOM | 4196 | CB  | PHE B 656 | 27.552 | 5.402 | 2.177  | 1.00 | 0.00 | A | C |
| ATOM | 4197 | CG  | PHE B 656 | 28.214 | 4.493 | 3.143  | 1.00 | 0.00 | A | C |
| ATOM | 4198 | CD1 | PHE B 656 | 29.450 | 4.788 | 3.661  | 1.00 | 0.00 | A | C |

|      |      |     |           |        |        |        |      |      |   |   |
|------|------|-----|-----------|--------|--------|--------|------|------|---|---|
| ATOM | 4199 | CE1 | PHE B 656 | 30.047 | 3.930  | 4.553  | 1.00 | 0.00 | A | C |
| ATOM | 4200 | CZ  | PHE B 656 | 29.404 | 2.775  | 4.927  | 1.00 | 0.00 | A | C |
| ATOM | 4201 | CD2 | PHE B 656 | 27.576 | 3.333  | 3.520  | 1.00 | 0.00 | A | C |
| ATOM | 4202 | CE2 | PHE B 656 | 28.167 | 2.473  | 4.410  | 1.00 | 0.00 | A | C |
| ATOM | 4203 | C   | PHE B 656 | 25.552 | 6.673  | 2.525  | 1.00 | 0.00 | A | C |
| ATOM | 4204 | O   | PHE B 656 | 25.217 | 6.158  | 1.472  | 1.00 | 0.00 | A | O |
| ATOM | 4205 | N   | LYS B 657 | 24.669 | 7.293  | 3.321  | 1.00 | 0.00 | A | N |
| ATOM | 4206 | CA  | LYS B 657 | 23.305 | 7.414  | 2.906  | 1.00 | 0.00 | A | C |
| ATOM | 4207 | CB  | LYS B 657 | 22.367 | 8.005  | 3.961  | 1.00 | 0.00 | A | C |
| ATOM | 4208 | CG  | LYS B 657 | 20.903 | 7.857  | 3.550  | 1.00 | 0.00 | A | C |
| ATOM | 4209 | CD  | LYS B 657 | 20.450 | 6.395  | 3.527  | 1.00 | 0.00 | A | C |
| ATOM | 4210 | CE  | LYS B 657 | 18.988 | 6.200  | 3.124  | 1.00 | 0.00 | A | C |
| ATOM | 4211 | NZ  | LYS B 657 | 18.627 | 4.769  | 3.235  | 1.00 | 0.00 | A | N |
| ATOM | 4212 | C   | LYS B 657 | 23.249 | 8.320  | 1.728  | 1.00 | 0.00 | A | C |
| ATOM | 4213 | O   | LYS B 657 | 22.416 | 8.151  | 0.848  | 1.00 | 0.00 | A | O |
| ATOM | 4214 | N   | ALA B 658 | 24.111 | 9.344  | 1.685  | 1.00 | 0.00 | A | N |
| ATOM | 4215 | CA  | ALA B 658 | 24.054 | 10.206 | 0.546  | 1.00 | 0.00 | A | C |
| ATOM | 4216 | CB  | ALA B 658 | 25.073 | 11.353 | 0.607  | 1.00 | 0.00 | A | C |
| ATOM | 4217 | C   | ALA B 658 | 24.388 | 9.381  | -0.652 | 1.00 | 0.00 | A | C |
| ATOM | 4218 | O   | ALA B 658 | 23.746 | 9.504  | -1.695 | 1.00 | 0.00 | A | O |
| ATOM | 4219 | N   | VAL B 659 | 25.415 | 8.515  | -0.542 | 1.00 | 0.00 | A | N |
| ATOM | 4220 | CA  | VAL B 659 | 25.753 | 7.713  | -1.679 | 1.00 | 0.00 | A | C |
| ATOM | 4221 | CB  | VAL B 659 | 27.036 | 6.925  | -1.585 | 1.00 | 0.00 | A | C |
| ATOM | 4222 | CG1 | VAL B 659 | 28.190 | 7.871  | -1.227 | 1.00 | 0.00 | A | C |
| ATOM | 4223 | CG2 | VAL B 659 | 26.851 | 5.711  | -0.669 | 1.00 | 0.00 | A | C |
| ATOM | 4224 | C   | VAL B 659 | 24.657 | 6.712  | -1.896 | 1.00 | 0.00 | A | C |
| ATOM | 4225 | O   | VAL B 659 | 24.361 | 6.337  | -3.025 | 1.00 | 0.00 | A | O |
| ATOM | 4226 | N   | PHE B 660 | 24.060 | 6.234  | -0.792 | 1.00 | 0.00 | A | N |
| ATOM | 4227 | CA  | PHE B 660 | 23.073 | 5.193  | -0.722 | 1.00 | 0.00 | A | C |
| ATOM | 4228 | CB  | PHE B 660 | 22.731 | 4.791  | 0.728  | 1.00 | 0.00 | A | C |
| ATOM | 4229 | CG  | PHE B 660 | 21.681 | 3.724  | 0.714  | 1.00 | 0.00 | A | C |
| ATOM | 4230 | CD1 | PHE B 660 | 20.346 | 4.053  | 0.668  | 1.00 | 0.00 | A | C |
| ATOM | 4231 | CE1 | PHE B 660 | 19.373 | 3.080  | 0.657  | 1.00 | 0.00 | A | C |
| ATOM | 4232 | CZ  | PHE B 660 | 19.730 | 1.755  | 0.696  | 1.00 | 0.00 | A | C |
| ATOM | 4233 | CD2 | PHE B 660 | 22.030 | 2.393  | 0.755  | 1.00 | 0.00 | A | C |
| ATOM | 4234 | CE2 | PHE B 660 | 21.060 | 1.415  | 0.746  | 1.00 | 0.00 | A | C |
| ATOM | 4235 | C   | PHE B 660 | 21.809 | 5.607  | -1.385 | 1.00 | 0.00 | A | C |
| ATOM | 4236 | O   | PHE B 660 | 21.243 | 4.868  | -2.183 | 1.00 | 0.00 | A | O |

|      |      |     |           |        |        |        |      |      |   |   |
|------|------|-----|-----------|--------|--------|--------|------|------|---|---|
| ATOM | 4237 | N   | ILE B 661 | 21.343 | 6.820  | -1.077 | 1.00 | 0.00 | A | N |
| ATOM | 4238 | CA  | ILE B 661 | 20.118 | 7.338  | -1.588 | 1.00 | 0.00 | A | C |
| ATOM | 4239 | CB  | ILE B 661 | 19.857 | 8.708  | -1.033 | 1.00 | 0.00 | A | C |
| ATOM | 4240 | CG2 | ILE B 661 | 19.653 | 8.578  | 0.487  | 1.00 | 0.00 | A | C |
| ATOM | 4241 | CG1 | ILE B 661 | 21.019 | 9.635  | -1.417 | 1.00 | 0.00 | A | C |
| ATOM | 4242 | CD  | ILE B 661 | 20.847 | 11.080 | -0.989 | 1.00 | 0.00 | A | C |
| ATOM | 4243 | C   | ILE B 661 | 20.269 | 7.389  | -3.066 | 1.00 | 0.00 | A | C |
| ATOM | 4244 | O   | ILE B 661 | 19.369 | 7.000  | -3.804 | 1.00 | 0.00 | A | O |
| ATOM | 4245 | N   | ILE B 662 | 21.446 | 7.827  | -3.536 | 1.00 | 0.00 | A | N |
| ATOM | 4246 | CA  | ILE B 662 | 21.684 | 7.931  | -4.938 | 1.00 | 0.00 | A | C |
| ATOM | 4247 | CB  | ILE B 662 | 23.047 | 8.484  | -5.223 | 1.00 | 0.00 | A | C |
| ATOM | 4248 | CG2 | ILE B 662 | 23.254 | 8.492  | -6.745 | 1.00 | 0.00 | A | C |
| ATOM | 4249 | CG1 | ILE B 662 | 23.174 | 9.873  | -4.578 | 1.00 | 0.00 | A | C |
| ATOM | 4250 | CD  | ILE B 662 | 24.611 | 10.366 | -4.463 | 1.00 | 0.00 | A | C |
| ATOM | 4251 | C   | ILE B 662 | 21.592 | 6.558  | -5.525 | 1.00 | 0.00 | A | C |
| ATOM | 4252 | O   | ILE B 662 | 21.020 | 6.367  | -6.596 | 1.00 | 0.00 | A | O |
| ATOM | 4253 | N   | LEU B 663 | 22.151 | 5.559  | -4.819 | 1.00 | 0.00 | A | N |
| ATOM | 4254 | CA  | LEU B 663 | 22.176 | 4.203  | -5.283 | 1.00 | 0.00 | A | C |
| ATOM | 4255 | CB  | LEU B 663 | 22.975 | 3.309  | -4.313 | 1.00 | 0.00 | A | C |
| ATOM | 4256 | CG  | LEU B 663 | 23.079 | 1.825  | -4.707 | 1.00 | 0.00 | A | C |
| ATOM | 4257 | CD1 | LEU B 663 | 21.753 | 1.081  | -4.477 | 1.00 | 0.00 | A | C |
| ATOM | 4258 | CD2 | LEU B 663 | 23.604 | 1.673  | -6.140 | 1.00 | 0.00 | A | C |
| ATOM | 4259 | C   | LEU B 663 | 20.767 | 3.703  | -5.405 | 1.00 | 0.00 | A | C |
| ATOM | 4260 | O   | LEU B 663 | 20.420 | 3.005  | -6.359 | 1.00 | 0.00 | A | O |
| ATOM | 4261 | N   | LEU B 664 | 19.909 | 4.050  | -4.431 | 1.00 | 0.00 | A | N |
| ATOM | 4262 | CA  | LEU B 664 | 18.553 | 3.590  | -4.418 | 1.00 | 0.00 | A | C |
| ATOM | 4263 | CB  | LEU B 664 | 17.866 | 3.979  | -3.095 | 1.00 | 0.00 | A | C |
| ATOM | 4264 | CG  | LEU B 664 | 16.520 | 3.290  | -2.834 | 1.00 | 0.00 | A | C |
| ATOM | 4265 | CD1 | LEU B 664 | 15.449 | 3.757  | -3.825 | 1.00 | 0.00 | A | C |
| ATOM | 4266 | CD2 | LEU B 664 | 16.675 | 1.761  | -2.798 | 1.00 | 0.00 | A | C |
| ATOM | 4267 | C   | LEU B 664 | 17.832 | 4.186  | -5.586 | 1.00 | 0.00 | A | C |
| ATOM | 4268 | O   | LEU B 664 | 17.066 | 3.508  | -6.272 | 1.00 | 0.00 | A | O |
| ATOM | 4269 | N   | LEU B 665 | 18.076 | 5.482  | -5.864 | 1.00 | 0.00 | A | N |
| ATOM | 4270 | CA  | LEU B 665 | 17.424 | 6.106  | -6.976 | 1.00 | 0.00 | A | C |
| ATOM | 4271 | CB  | LEU B 665 | 17.678 | 7.619  | -7.087 | 1.00 | 0.00 | A | C |
| ATOM | 4272 | CG  | LEU B 665 | 16.801 | 8.466  | -6.137 | 1.00 | 0.00 | A | C |
| ATOM | 4273 | CD1 | LEU B 665 | 17.021 | 8.114  | -4.660 | 1.00 | 0.00 | A | C |
| ATOM | 4274 | CD2 | LEU B 665 | 16.973 | 9.965  | -6.417 | 1.00 | 0.00 | A | C |

|      |      |     |           |        |        |         |      |      |   |   |
|------|------|-----|-----------|--------|--------|---------|------|------|---|---|
| ATOM | 4275 | C   | LEU B 665 | 17.856 | 5.446  | -8.243  | 1.00 | 0.00 | A | C |
| ATOM | 4276 | O   | LEU B 665 | 17.040 | 5.220  | -9.133  | 1.00 | 0.00 | A | O |
| ATOM | 4277 | N   | ALA B 666 | 19.153 | 5.109  | -8.368  | 1.00 | 0.00 | A | N |
| ATOM | 4278 | CA  | ALA B 666 | 19.623 | 4.521  | -9.587  | 1.00 | 0.00 | A | C |
| ATOM | 4279 | CB  | ALA B 666 | 21.143 | 4.282  | -9.576  | 1.00 | 0.00 | A | C |
| ATOM | 4280 | C   | ALA B 666 | 18.971 | 3.190  | -9.823  | 1.00 | 0.00 | A | C |
| ATOM | 4281 | O   | ALA B 666 | 18.491 | 2.919  | -10.921 | 1.00 | 0.00 | A | O |
| ATOM | 4282 | N   | TYR B 667 | 18.946 | 2.317  | -8.798  | 1.00 | 0.00 | A | N |
| ATOM | 4283 | CA  | TYR B 667 | 18.410 | 0.997  | -8.979  | 1.00 | 0.00 | A | C |
| ATOM | 4284 | CB  | TYR B 667 | 18.744 | 0.063  | -7.804  | 1.00 | 0.00 | A | C |
| ATOM | 4285 | CG  | TYR B 667 | 18.093 | -1.251 | -8.058  | 1.00 | 0.00 | A | C |
| ATOM | 4286 | CD1 | TYR B 667 | 18.505 | -2.046 | -9.100  | 1.00 | 0.00 | A | C |
| ATOM | 4287 | CE1 | TYR B 667 | 17.915 | -3.265 | -9.332  | 1.00 | 0.00 | A | C |
| ATOM | 4288 | CZ  | TYR B 667 | 16.905 | -3.702 | -8.515  | 1.00 | 0.00 | A | C |
| ATOM | 4289 | OH  | TYR B 667 | 16.300 | -4.953 | -8.754  | 1.00 | 0.00 | A | O |
| ATOM | 4290 | CD2 | TYR B 667 | 17.081 | -1.699 | -7.240  | 1.00 | 0.00 | A | C |
| ATOM | 4291 | CE2 | TYR B 667 | 16.486 | -2.916 | -7.467  | 1.00 | 0.00 | A | C |
| ATOM | 4292 | C   | TYR B 667 | 16.926 | 1.014  | -9.157  | 1.00 | 0.00 | A | C |
| ATOM | 4293 | O   | TYR B 667 | 16.399 | 0.390  | -10.076 | 1.00 | 0.00 | A | O |
| ATOM | 4294 | N   | VAL B 668 | 16.208 | 1.736  | -8.281  | 1.00 | 0.00 | A | N |
| ATOM | 4295 | CA  | VAL B 668 | 14.777 | 1.708  | -8.341  | 1.00 | 0.00 | A | C |
| ATOM | 4296 | CB  | VAL B 668 | 14.122 | 2.446  | -7.214  | 1.00 | 0.00 | A | C |
| ATOM | 4297 | CG1 | VAL B 668 | 12.601 | 2.418  | -7.436  | 1.00 | 0.00 | A | C |
| ATOM | 4298 | CG2 | VAL B 668 | 14.574 | 1.814  | -5.886  | 1.00 | 0.00 | A | C |
| ATOM | 4299 | C   | VAL B 668 | 14.299 | 2.328  | -9.612  | 1.00 | 0.00 | A | C |
| ATOM | 4300 | O   | VAL B 668 | 13.448 | 1.767  | -10.302 | 1.00 | 0.00 | A | O |
| ATOM | 4301 | N   | ILE B 669 | 14.850 | 3.500  | -9.975  | 1.00 | 0.00 | A | N |
| ATOM | 4302 | CA  | ILE B 669 | 14.313 | 4.170  | -11.121 | 1.00 | 0.00 | A | C |
| ATOM | 4303 | CB  | ILE B 669 | 14.891 | 5.547  | -11.354 | 1.00 | 0.00 | A | C |
| ATOM | 4304 | CG2 | ILE B 669 | 14.627 | 6.352  | -10.068 | 1.00 | 0.00 | A | C |
| ATOM | 4305 | CG1 | ILE B 669 | 16.372 | 5.531  | -11.774 | 1.00 | 0.00 | A | C |
| ATOM | 4306 | CD  | ILE B 669 | 16.588 | 5.287  | -13.269 | 1.00 | 0.00 | A | C |
| ATOM | 4307 | C   | ILE B 669 | 14.541 | 3.309  | -12.319 | 1.00 | 0.00 | A | C |
| ATOM | 4308 | O   | ILE B 669 | 13.637 | 3.111  | -13.128 | 1.00 | 0.00 | A | O |
| ATOM | 4309 | N   | LEU B 670 | 15.749 | 2.735  | -12.441 | 1.00 | 0.00 | A | N |
| ATOM | 4310 | CA  | LEU B 670 | 16.076 | 1.955  | -13.598 | 1.00 | 0.00 | A | C |
| ATOM | 4311 | CB  | LEU B 670 | 17.509 | 1.392  | -13.535 | 1.00 | 0.00 | A | C |
| ATOM | 4312 | CG  | LEU B 670 | 17.826 | 0.379  | -14.653 | 1.00 | 0.00 | A | C |

|      |      |     |     |   |     |        |        |         |      |      |   |   |
|------|------|-----|-----|---|-----|--------|--------|---------|------|------|---|---|
| ATOM | 4313 | CD1 | LEU | B | 670 | 17.726 | 1.029  | -16.040 | 1.00 | 0.00 | A | C |
| ATOM | 4314 | CD2 | LEU | B | 670 | 19.176 | -0.321 | -14.421 | 1.00 | 0.00 | A | C |
| ATOM | 4315 | C   | LEU | B | 670 | 15.164 | 0.778  | -13.689 | 1.00 | 0.00 | A | C |
| ATOM | 4316 | O   | LEU | B | 670 | 14.599 | 0.504  | -14.748 | 1.00 | 0.00 | A | O |
| ATOM | 4317 | N   | THR | B | 671 | 14.970 | 0.060  | -12.567 | 1.00 | 0.00 | A | N |
| ATOM | 4318 | CA  | THR | B | 671 | 14.218 | -1.158 | -12.658 | 1.00 | 0.00 | A | C |
| ATOM | 4319 | CB  | THR | B | 671 | 14.179 | -1.975 | -11.394 | 1.00 | 0.00 | A | C |
| ATOM | 4320 | OG1 | THR | B | 671 | 13.382 | -1.358 | -10.396 | 1.00 | 0.00 | A | O |
| ATOM | 4321 | CG2 | THR | B | 671 | 15.615 | -2.116 | -10.888 | 1.00 | 0.00 | A | C |
| ATOM | 4322 | C   | THR | B | 671 | 12.810 | -0.864 | -13.037 | 1.00 | 0.00 | A | C |
| ATOM | 4323 | O   | THR | B | 671 | 12.229 | -1.546 | -13.881 | 1.00 | 0.00 | A | O |
| ATOM | 4324 | N   | TYR | B | 672 | 12.205 | 0.155  | -12.412 | 1.00 | 0.00 | A | N |
| ATOM | 4325 | CA  | TYR | B | 672 | 10.838 | 0.436  | -12.726 | 1.00 | 0.00 | A | C |
| ATOM | 4326 | CB  | TYR | B | 672 | 10.250 | 1.534  | -11.818 | 1.00 | 0.00 | A | C |
| ATOM | 4327 | CG  | TYR | B | 672 | 8.831  | 1.782  | -12.207 | 1.00 | 0.00 | A | C |
| ATOM | 4328 | CD1 | TYR | B | 672 | 7.832  | 0.900  | -11.851 | 1.00 | 0.00 | A | C |
| ATOM | 4329 | CE1 | TYR | B | 672 | 6.526  | 1.137  | -12.209 | 1.00 | 0.00 | A | C |
| ATOM | 4330 | CZ  | TYR | B | 672 | 6.203  | 2.270  | -12.925 | 1.00 | 0.00 | A | C |
| ATOM | 4331 | OH  | TYR | B | 672 | 4.865  | 2.523  | -13.299 | 1.00 | 0.00 | A | O |
| ATOM | 4332 | CD2 | TYR | B | 672 | 8.495  | 2.913  | -12.910 | 1.00 | 0.00 | A | C |
| ATOM | 4333 | CE2 | TYR | B | 672 | 7.190  | 3.156  | -13.272 | 1.00 | 0.00 | A | C |
| ATOM | 4334 | C   | TYR | B | 672 | 10.779 | 0.895  | -14.140 | 1.00 | 0.00 | A | C |
| ATOM | 4335 | O   | TYR | B | 672 | 9.937  | 0.454  | -14.922 | 1.00 | 0.00 | A | O |
| ATOM | 4336 | N   | ILE | B | 673 | 11.698 | 1.805  | -14.506 | 1.00 | 0.00 | A | N |
| ATOM | 4337 | CA  | ILE | B | 673 | 11.611 | 2.381  | -15.803 | 1.00 | 0.00 | A | C |
| ATOM | 4338 | CB  | ILE | B | 673 | 12.444 | 3.625  | -15.925 | 1.00 | 0.00 | A | C |
| ATOM | 4339 | CG2 | ILE | B | 673 | 13.936 | 3.262  | -15.859 | 1.00 | 0.00 | A | C |
| ATOM | 4340 | CG1 | ILE | B | 673 | 12.030 | 4.390  | -17.185 | 1.00 | 0.00 | A | C |
| ATOM | 4341 | CD  | ILE | B | 673 | 10.595 | 4.910  | -17.113 | 1.00 | 0.00 | A | C |
| ATOM | 4342 | C   | ILE | B | 673 | 11.941 | 1.432  | -16.923 | 1.00 | 0.00 | A | C |
| ATOM | 4343 | O   | ILE | B | 673 | 11.156 | 1.311  | -17.858 | 1.00 | 0.00 | A | O |
| ATOM | 4344 | N   | LEU | B | 674 | 13.122 | 0.774  | -16.910 | 1.00 | 0.00 | A | N |
| ATOM | 4345 | CA  | LEU | B | 674 | 13.467 | -0.059 | -18.034 | 1.00 | 0.00 | A | C |
| ATOM | 4346 | CB  | LEU | B | 674 | 14.986 | -0.189 | -18.218 | 1.00 | 0.00 | A | C |
| ATOM | 4347 | CG  | LEU | B | 674 | 15.652 | 1.171  | -18.483 | 1.00 | 0.00 | A | C |
| ATOM | 4348 | CD1 | LEU | B | 674 | 17.111 | 1.000  | -18.926 | 1.00 | 0.00 | A | C |
| ATOM | 4349 | CD2 | LEU | B | 674 | 14.822 | 2.018  | -19.458 | 1.00 | 0.00 | A | C |
| ATOM | 4350 | C   | LEU | B | 674 | 12.880 | -1.444 | -18.041 | 1.00 | 0.00 | A | C |

|      |      |     |           |        |        |         |      |      |   |   |
|------|------|-----|-----------|--------|--------|---------|------|------|---|---|
| ATOM | 4351 | O   | LEU B 674 | 12.230 | -1.845 | -19.004 | 1.00 | 0.00 | A | O |
| ATOM | 4352 | N   | LEU B 675 | 13.093 | -2.210 | -16.952 | 1.00 | 0.00 | A | N |
| ATOM | 4353 | CA  | LEU B 675 | 12.745 | -3.609 | -16.916 | 1.00 | 0.00 | A | C |
| ATOM | 4354 | CB  | LEU B 675 | 13.186 | -4.278 | -15.601 | 1.00 | 0.00 | A | C |
| ATOM | 4355 | CG  | LEU B 675 | 14.687 | -4.601 | -15.498 | 1.00 | 0.00 | A | C |
| ATOM | 4356 | CD1 | LEU B 675 | 15.060 | -5.770 | -16.425 | 1.00 | 0.00 | A | C |
| ATOM | 4357 | CD2 | LEU B 675 | 15.552 | -3.354 | -15.725 | 1.00 | 0.00 | A | C |
| ATOM | 4358 | C   | LEU B 675 | 11.276 | -3.848 | -17.012 | 1.00 | 0.00 | A | C |
| ATOM | 4359 | O   | LEU B 675 | 10.814 | -4.582 | -17.885 | 1.00 | 0.00 | A | O |
| ATOM | 4360 | N   | LEU B 676 | 10.500 | -3.217 | -16.117 | 1.00 | 0.00 | A | N |
| ATOM | 4361 | CA  | LEU B 676 | 9.100  | -3.511 | -16.073 | 1.00 | 0.00 | A | C |
| ATOM | 4362 | CB  | LEU B 676 | 8.364  | -2.845 | -14.901 | 1.00 | 0.00 | A | C |
| ATOM | 4363 | CG  | LEU B 676 | 8.686  | -3.494 | -13.546 | 1.00 | 0.00 | A | C |
| ATOM | 4364 | CD1 | LEU B 676 | 8.200  | -4.955 | -13.524 | 1.00 | 0.00 | A | C |
| ATOM | 4365 | CD2 | LEU B 676 | 10.169 | -3.345 | -13.172 | 1.00 | 0.00 | A | C |
| ATOM | 4366 | C   | LEU B 676 | 8.457  | -3.071 | -17.335 | 1.00 | 0.00 | A | C |
| ATOM | 4367 | O   | LEU B 676 | 7.678  | -3.817 | -17.926 | 1.00 | 0.00 | A | O |
| ATOM | 4368 | N   | ASN B 677 | 8.783  | -1.853 | -17.794 | 1.00 | 0.00 | A | N |
| ATOM | 4369 | CA  | ASN B 677 | 8.185  | -1.331 | -18.983 | 1.00 | 0.00 | A | C |
| ATOM | 4370 | CB  | ASN B 677 | 8.630  | 0.111  | -19.277 | 1.00 | 0.00 | A | C |
| ATOM | 4371 | CG  | ASN B 677 | 8.156  | 0.972  | -18.116 | 1.00 | 0.00 | A | C |
| ATOM | 4372 | OD1 | ASN B 677 | 7.346  | 0.537  | -17.300 | 1.00 | 0.00 | A | O |
| ATOM | 4373 | ND2 | ASN B 677 | 8.665  | 2.230  | -18.038 | 1.00 | 0.00 | A | N |
| ATOM | 4374 | C   | ASN B 677 | 8.618  | -2.185 | -20.127 | 1.00 | 0.00 | A | C |
| ATOM | 4375 | O   | ASN B 677 | 7.822  | -2.502 | -21.009 | 1.00 | 0.00 | A | O |
| ATOM | 4376 | N   | MET B 678 | 9.902  | -2.582 | -20.137 | 1.00 | 0.00 | A | N |
| ATOM | 4377 | CA  | MET B 678 | 10.433 | -3.378 | -21.204 | 1.00 | 0.00 | A | C |
| ATOM | 4378 | CB  | MET B 678 | 11.926 | -3.693 | -21.008 | 1.00 | 0.00 | A | C |
| ATOM | 4379 | CG  | MET B 678 | 12.528 | -4.611 | -22.075 | 1.00 | 0.00 | A | C |
| ATOM | 4380 | SD  | MET B 678 | 14.336 | -4.789 | -21.968 | 1.00 | 0.00 | A | S |
| ATOM | 4381 | CE  | MET B 678 | 14.333 | -5.621 | -20.353 | 1.00 | 0.00 | A | C |
| ATOM | 4382 | C   | MET B 678 | 9.716  | -4.686 | -21.256 | 1.00 | 0.00 | A | C |
| ATOM | 4383 | O   | MET B 678 | 9.318  | -5.130 | -22.329 | 1.00 | 0.00 | A | O |
| ATOM | 4384 | N   | LEU B 679 | 9.522  | -5.350 | -20.099 | 1.00 | 0.00 | A | N |
| ATOM | 4385 | CA  | LEU B 679 | 8.874  | -6.626 | -20.164 | 1.00 | 0.00 | A | C |
| ATOM | 4386 | CB  | LEU B 679 | 8.922  | -7.429 | -18.842 | 1.00 | 0.00 | A | C |
| ATOM | 4387 | CG  | LEU B 679 | 7.768  | -7.214 | -17.838 | 1.00 | 0.00 | A | C |
| ATOM | 4388 | CD1 | LEU B 679 | 6.485  | -7.953 | -18.260 | 1.00 | 0.00 | A | C |



|      |      |               |        |         |         |      |      |   |   |
|------|------|---------------|--------|---------|---------|------|------|---|---|
| ATOM | 4389 | CD2 LEU B 679 | 8.209  | -7.584  | -16.411 | 1.00 | 0.00 | A | C |
| ATOM | 4390 | C LEU B 679   | 7.447  | -6.426  | -20.574 | 1.00 | 0.00 | A | C |
| ATOM | 4391 | O LEU B 679   | 6.929  | -7.150  | -21.421 | 1.00 | 0.00 | A | O |
| ATOM | 4392 | N ILE B 680   | 6.789  | -5.406  | -19.988 | 1.00 | 0.00 | A | N |
| ATOM | 4393 | CA ILE B 680  | 5.393  | -5.142  | -20.206 | 1.00 | 0.00 | A | C |
| ATOM | 4394 | CB ILE B 680  | 4.863  | -4.024  | -19.354 | 1.00 | 0.00 | A | C |
| ATOM | 4395 | CG2 ILE B 680 | 3.413  | -3.748  | -19.784 | 1.00 | 0.00 | A | C |
| ATOM | 4396 | CG1 ILE B 680 | 5.000  | -4.378  | -17.861 | 1.00 | 0.00 | A | C |
| ATOM | 4397 | CD ILE B 680  | 4.263  | -5.652  | -17.457 | 1.00 | 0.00 | A | C |
| ATOM | 4398 | C ILE B 680   | 5.165  | -4.791  | -21.642 | 1.00 | 0.00 | A | C |
| ATOM | 4399 | O ILE B 680   | 4.167  | -5.196  | -22.237 | 1.00 | 0.00 | A | O |
| ATOM | 4400 | N ALA B 681   | 6.084  | -4.011  | -22.235 | 1.00 | 0.00 | A | N |
| ATOM | 4401 | CA ALA B 681  | 5.957  | -3.600  | -23.601 | 1.00 | 0.00 | A | C |
| ATOM | 4402 | CB ALA B 681  | 7.131  | -2.726  | -24.075 | 1.00 | 0.00 | A | C |
| ATOM | 4403 | C ALA B 681   | 5.959  | -4.843  | -24.426 | 1.00 | 0.00 | A | C |
| ATOM | 4404 | O ALA B 681   | 5.233  | -4.954  | -25.412 | 1.00 | 0.00 | A | O |
| ATOM | 4405 | N LEU B 682   | 6.786  | -5.815  | -24.013 | 1.00 | 0.00 | A | N |
| ATOM | 4406 | CA LEU B 682  | 6.940  | -7.076  | -24.676 | 1.00 | 0.00 | A | C |
| ATOM | 4407 | CB LEU B 682  | 7.946  | -7.986  | -23.945 | 1.00 | 0.00 | A | C |
| ATOM | 4408 | CG LEU B 682  | 9.384  | -7.440  | -23.881 | 1.00 | 0.00 | A | C |
| ATOM | 4409 | CD1 LEU B 682 | 10.296 | -8.381  | -23.077 | 1.00 | 0.00 | A | C |
| ATOM | 4410 | CD2 LEU B 682 | 9.934  | -7.154  | -25.288 | 1.00 | 0.00 | A | C |
| ATOM | 4411 | C LEU B 682   | 5.627  | -7.807  | -24.639 | 1.00 | 0.00 | A | C |
| ATOM | 4412 | O LEU B 682   | 5.257  | -8.479  | -25.602 | 1.00 | 0.00 | A | O |
| ATOM | 4413 | N MET B 683   | 4.876  | -7.670  | -23.528 | 1.00 | 0.00 | A | N |
| ATOM | 4414 | CA MET B 683  | 3.668  | -8.414  | -23.277 | 1.00 | 0.00 | A | C |
| ATOM | 4415 | CB MET B 683  | 2.977  | -7.991  | -21.964 | 1.00 | 0.00 | A | C |
| ATOM | 4416 | CG MET B 683  | 3.736  | -8.310  | -20.672 | 1.00 | 0.00 | A | C |
| ATOM | 4417 | SD MET B 683  | 3.664  | -10.048 | -20.142 | 1.00 | 0.00 | A | S |
| ATOM | 4418 | CE MET B 683  | 4.095  | -9.698  | -18.411 | 1.00 | 0.00 | A | C |
| ATOM | 4419 | C MET B 683   | 2.645  | -8.181  | -24.349 | 1.00 | 0.00 | A | C |
| ATOM | 4420 | O MET B 683   | 1.995  | -9.121  | -24.805 | 1.00 | 0.00 | A | O |
| ATOM | 4421 | N GLY B 684   | 2.476  | -6.931  | -24.807 | 1.00 | 0.00 | A | N |
| ATOM | 4422 | CA GLY B 684  | 1.412  | -6.656  | -25.729 | 1.00 | 0.00 | A | C |
| ATOM | 4423 | C GLY B 684   | 1.573  | -7.479  | -26.968 | 1.00 | 0.00 | A | C |
| ATOM | 4424 | O GLY B 684   | 0.594  | -7.988  | -27.507 | 1.00 | 0.00 | A | O |
| ATOM | 4425 | N GLU B 685   | 2.815  | -7.645  | -27.448 | 1.00 | 0.00 | A | N |
| ATOM | 4426 | CA GLU B 685  | 3.061  | -8.319  | -28.691 | 1.00 | 0.00 | A | C |

|      |      |     |           |        |         |         |      |      |   |   |
|------|------|-----|-----------|--------|---------|---------|------|------|---|---|
| ATOM | 4427 | CB  | GLU B 685 | 4.564  | -8.414  | -28.987 | 1.00 | 0.00 | A | C |
| ATOM | 4428 | CG  | GLU B 685 | 5.235  | -7.051  | -29.154 | 1.00 | 0.00 | A | C |
| ATOM | 4429 | CD  | GLU B 685 | 6.742  | -7.269  | -29.101 | 1.00 | 0.00 | A | C |
| ATOM | 4430 | OE1 | GLU B 685 | 7.273  | -7.432  | -27.969 | 1.00 | 0.00 | A | O |
| ATOM | 4431 | OE2 | GLU B 685 | 7.380  | -7.279  | -30.185 | 1.00 | 0.00 | A | O |
| ATOM | 4432 | C   | GLU B 685 | 2.556  | -9.725  | -28.621 | 1.00 | 0.00 | A | C |
| ATOM | 4433 | O   | GLU B 685 | 1.900  | -10.198 | -29.548 | 1.00 | 0.00 | A | O |
| ATOM | 4434 | N   | THR B 686 | 2.847  | -10.429 | -27.512 | 1.00 | 0.00 | A | N |
| ATOM | 4435 | CA  | THR B 686 | 2.449  | -11.801 | -27.387 | 1.00 | 0.00 | A | C |
| ATOM | 4436 | CB  | THR B 686 | 2.914  | -12.440 | -26.110 | 1.00 | 0.00 | A | C |
| ATOM | 4437 | OG1 | THR B 686 | 2.311  | -11.803 | -24.991 | 1.00 | 0.00 | A | O |
| ATOM | 4438 | CG2 | THR B 686 | 4.444  | -12.322 | -26.032 | 1.00 | 0.00 | A | C |
| ATOM | 4439 | C   | THR B 686 | 0.960  | -11.866 | -27.391 | 1.00 | 0.00 | A | C |
| ATOM | 4440 | O   | THR B 686 | 0.371  | -12.741 | -28.023 | 1.00 | 0.00 | A | O |
| ATOM | 4441 | N   | VAL B 687 | 0.314  | -10.937 | -26.660 | 1.00 | 0.00 | A | N |
| ATOM | 4442 | CA  | VAL B 687 | -1.116 | -10.904 | -26.585 | 1.00 | 0.00 | A | C |
| ATOM | 4443 | CB  | VAL B 687 | -1.633 | -9.866  | -25.630 | 1.00 | 0.00 | A | C |
| ATOM | 4444 | CG1 | VAL B 687 | -3.165 | -9.815  | -25.751 | 1.00 | 0.00 | A | C |
| ATOM | 4445 | CG2 | VAL B 687 | -1.135 | -10.211 | -24.217 | 1.00 | 0.00 | A | C |
| ATOM | 4446 | C   | VAL B 687 | -1.681 | -10.589 | -27.939 | 1.00 | 0.00 | A | C |
| ATOM | 4447 | O   | VAL B 687 | -2.677 | -11.175 | -28.358 | 1.00 | 0.00 | A | O |
| ATOM | 4448 | N   | ASN B 688 | -1.075 | -9.632  | -28.659 | 1.00 | 0.00 | A | N |
| ATOM | 4449 | CA  | ASN B 688 | -1.594 | -9.252  | -29.941 | 1.00 | 0.00 | A | C |
| ATOM | 4450 | CB  | ASN B 688 | -0.862 | -8.048  | -30.564 | 1.00 | 0.00 | A | C |
| ATOM | 4451 | CG  | ASN B 688 | -1.378 | -6.767  | -29.921 | 1.00 | 0.00 | A | C |
| ATOM | 4452 | OD1 | ASN B 688 | -2.490 | -6.327  | -30.208 | 1.00 | 0.00 | A | O |
| ATOM | 4453 | ND2 | ASN B 688 | -0.559 | -6.148  | -29.034 | 1.00 | 0.00 | A | N |
| ATOM | 4454 | C   | ASN B 688 | -1.469 | -10.382 | -30.908 | 1.00 | 0.00 | A | C |
| ATOM | 4455 | O   | ASN B 688 | -2.422 | -10.702 | -31.619 | 1.00 | 0.00 | A | O |
| ATOM | 4456 | N   | LYS B 689 | -0.289 | -11.025 | -30.965 | 1.00 | 0.00 | A | N |
| ATOM | 4457 | CA  | LYS B 689 | -0.120 | -12.055 | -31.942 | 1.00 | 0.00 | A | C |
| ATOM | 4458 | CB  | LYS B 689 | 1.326  | -12.541 | -32.135 | 1.00 | 0.00 | A | C |
| ATOM | 4459 | CG  | LYS B 689 | 1.935  | -13.344 | -30.991 | 1.00 | 0.00 | A | C |
| ATOM | 4460 | CD  | LYS B 689 | 3.201  | -14.065 | -31.460 | 1.00 | 0.00 | A | C |
| ATOM | 4461 | CE  | LYS B 689 | 4.053  | -14.666 | -30.345 | 1.00 | 0.00 | A | C |
| ATOM | 4462 | NZ  | LYS B 689 | 5.307  | -15.204 | -30.921 | 1.00 | 0.00 | A | N |
| ATOM | 4463 | C   | LYS B 689 | -1.002 | -13.214 | -31.619 | 1.00 | 0.00 | A | C |
| ATOM | 4464 | O   | LYS B 689 | -1.566 | -13.834 | -32.518 | 1.00 | 0.00 | A | O |

|      |      |     |           |        |         |         |      |      |   |   |
|------|------|-----|-----------|--------|---------|---------|------|------|---|---|
| ATOM | 4465 | N   | ILE B 690 | -1.155 | -13.534 | -30.323 | 1.00 | 0.00 | A | N |
| ATOM | 4466 | CA  | ILE B 690 | -1.995 | -14.645 | -29.987 | 1.00 | 0.00 | A | C |
| ATOM | 4467 | CB  | ILE B 690 | -2.003 | -15.020 | -28.536 | 1.00 | 0.00 | A | C |
| ATOM | 4468 | CG2 | ILE B 690 | -2.364 | -13.803 | -27.684 | 1.00 | 0.00 | A | C |
| ATOM | 4469 | CG1 | ILE B 690 | -2.935 | -16.223 | -28.341 | 1.00 | 0.00 | A | C |
| ATOM | 4470 | CD  | ILE B 690 | -2.836 | -16.831 | -26.949 | 1.00 | 0.00 | A | C |
| ATOM | 4471 | C   | ILE B 690 | -3.391 | -14.354 | -30.425 | 1.00 | 0.00 | A | C |
| ATOM | 4472 | O   | ILE B 690 | -4.100 | -15.255 | -30.868 | 1.00 | 0.00 | A | O |
| ATOM | 4473 | N   | ALA B 691 | -3.835 | -13.091 | -30.283 | 1.00 | 0.00 | A | N |
| ATOM | 4474 | CA  | ALA B 691 | -5.171 | -12.722 | -30.661 | 1.00 | 0.00 | A | C |
| ATOM | 4475 | CB  | ALA B 691 | -5.480 | -11.247 | -30.356 | 1.00 | 0.00 | A | C |
| ATOM | 4476 | C   | ALA B 691 | -5.373 | -12.931 | -32.135 | 1.00 | 0.00 | A | C |
| ATOM | 4477 | O   | ALA B 691 | -6.401 | -13.459 | -32.554 | 1.00 | 0.00 | A | O |
| ATOM | 4478 | N   | GLN B 692 | -4.395 | -12.532 | -32.974 | 1.00 | 0.00 | A | N |
| ATOM | 4479 | CA  | GLN B 692 | -4.557 | -12.656 | -34.399 | 1.00 | 0.00 | A | C |
| ATOM | 4480 | CB  | GLN B 692 | -3.322 | -12.173 | -35.167 | 1.00 | 0.00 | A | C |
| ATOM | 4481 | CG  | GLN B 692 | -2.924 | -10.727 | -34.901 | 1.00 | 0.00 | A | C |
| ATOM | 4482 | CD  | GLN B 692 | -1.572 | -10.555 | -35.564 | 1.00 | 0.00 | A | C |
| ATOM | 4483 | OE1 | GLN B 692 | -1.388 | -10.973 | -36.705 | 1.00 | 0.00 | A | O |
| ATOM | 4484 | NE2 | GLN B 692 | -0.595 | -9.956  | -34.831 | 1.00 | 0.00 | A | N |
| ATOM | 4485 | C   | GLN B 692 | -4.656 | -14.108 | -34.737 | 1.00 | 0.00 | A | C |
| ATOM | 4486 | O   | GLN B 692 | -5.492 | -14.533 | -35.535 | 1.00 | 0.00 | A | O |
| ATOM | 4487 | N   | GLU B 693 | -3.770 | -14.895 | -34.111 | 1.00 | 0.00 | A | N |
| ATOM | 4488 | CA  | GLU B 693 | -3.620 | -16.306 | -34.299 | 1.00 | 0.00 | A | C |
| ATOM | 4489 | CB  | GLU B 693 | -2.374 | -16.850 | -33.580 | 1.00 | 0.00 | A | C |
| ATOM | 4490 | CG  | GLU B 693 | -1.061 | -16.307 | -34.156 | 1.00 | 0.00 | A | C |
| ATOM | 4491 | CD  | GLU B 693 | 0.079  | -16.739 | -33.244 | 1.00 | 0.00 | A | C |
| ATOM | 4492 | OE1 | GLU B 693 | 0.282  | -16.074 | -32.191 | 1.00 | 0.00 | A | O |
| ATOM | 4493 | OE2 | GLU B 693 | 0.762  | -17.739 | -33.585 | 1.00 | 0.00 | A | O |
| ATOM | 4494 | C   | GLU B 693 | -4.806 | -17.040 | -33.758 | 1.00 | 0.00 | A | C |
| ATOM | 4495 | O   | GLU B 693 | -5.133 | -18.104 | -34.268 | 1.00 | 0.00 | A | O |
| ATOM | 4496 | N   | SER B 694 | -5.513 | -16.469 | -32.765 | 1.00 | 0.00 | A | N |
| ATOM | 4497 | CA  | SER B 694 | -6.522 | -17.084 | -31.937 | 1.00 | 0.00 | A | C |
| ATOM | 4498 | CB  | SER B 694 | -7.369 | -16.018 | -31.221 | 1.00 | 0.00 | A | C |
| ATOM | 4499 | OG  | SER B 694 | -6.597 | -15.348 | -30.241 | 1.00 | 0.00 | A | O |
| ATOM | 4500 | C   | SER B 694 | -7.498 | -17.923 | -32.683 | 1.00 | 0.00 | A | C |
| ATOM | 4501 | O   | SER B 694 | -7.817 | -19.016 | -32.218 | 1.00 | 0.00 | A | O |
| ATOM | 4502 | N   | LYS B 695 | -8.033 | -17.451 | -33.819 | 1.00 | 0.00 | A | N |

|      |      |     |           |         |         |         |      |      |   |   |
|------|------|-----|-----------|---------|---------|---------|------|------|---|---|
| ATOM | 4503 | CA  | LYS B 695 | -8.978  | -18.292 | -34.493 | 1.00 | 0.00 | A | C |
| ATOM | 4504 | CB  | LYS B 695 | -9.442  | -17.700 | -35.833 | 1.00 | 0.00 | A | C |
| ATOM | 4505 | CG  | LYS B 695 | -10.428 | -16.540 | -35.722 | 1.00 | 0.00 | A | C |
| ATOM | 4506 | CD  | LYS B 695 | -11.788 | -16.960 | -35.170 | 1.00 | 0.00 | A | C |
| ATOM | 4507 | CE  | LYS B 695 | -12.881 | -15.913 | -35.389 | 1.00 | 0.00 | A | C |
| ATOM | 4508 | NZ  | LYS B 695 | -14.202 | -16.509 | -35.096 | 1.00 | 0.00 | A | N |
| ATOM | 4509 | C   | LYS B 695 | -8.258  | -19.560 | -34.831 | 1.00 | 0.00 | A | C |
| ATOM | 4510 | O   | LYS B 695 | -8.720  | -20.661 | -34.530 | 1.00 | 0.00 | A | O |
| ATOM | 4511 | N   | ASN B 696 | -7.060  | -19.398 | -35.413 | 1.00 | 0.00 | A | N |
| ATOM | 4512 | CA  | ASN B 696 | -6.186  | -20.440 | -35.870 | 1.00 | 0.00 | A | C |
| ATOM | 4513 | CB  | ASN B 696 | -4.960  | -19.865 | -36.595 | 1.00 | 0.00 | A | C |
| ATOM | 4514 | CG  | ASN B 696 | -5.448  | -18.932 | -37.694 | 1.00 | 0.00 | A | C |
| ATOM | 4515 | OD1 | ASN B 696 | -6.371  | -19.250 | -38.441 | 1.00 | 0.00 | A | O |
| ATOM | 4516 | ND2 | ASN B 696 | -4.821  | -17.727 | -37.778 | 1.00 | 0.00 | A | N |
| ATOM | 4517 | C   | ASN B 696 | -5.640  | -21.279 | -34.746 | 1.00 | 0.00 | A | C |
| ATOM | 4518 | O   | ASN B 696 | -5.665  | -22.506 | -34.812 | 1.00 | 0.00 | A | O |
| ATOM | 4519 | N   | ILE B 697 | -5.114  | -20.633 | -33.687 | 1.00 | 0.00 | A | N |
| ATOM | 4520 | CA  | ILE B 697 | -4.494  | -21.300 | -32.578 | 1.00 | 0.00 | A | C |
| ATOM | 4521 | CB  | ILE B 697 | -3.906  | -20.343 | -31.590 | 1.00 | 0.00 | A | C |
| ATOM | 4522 | CG2 | ILE B 697 | -2.755  | -19.572 | -32.263 | 1.00 | 0.00 | A | C |
| ATOM | 4523 | CG1 | ILE B 697 | -5.018  | -19.446 | -31.043 | 1.00 | 0.00 | A | C |
| ATOM | 4524 | CD  | ILE B 697 | -4.589  | -18.594 | -29.868 | 1.00 | 0.00 | A | C |
| ATOM | 4525 | C   | ILE B 697 | -5.525  | -22.126 | -31.887 | 1.00 | 0.00 | A | C |
| ATOM | 4526 | O   | ILE B 697 | -5.273  | -23.267 | -31.503 | 1.00 | 0.00 | A | O |
| ATOM | 4527 | N   | TRP B 698 | -6.734  | -21.562 | -31.746 | 1.00 | 0.00 | A | N |
| ATOM | 4528 | CA  | TRP B 698 | -7.813  | -22.241 | -31.111 | 1.00 | 0.00 | A | C |
| ATOM | 4529 | CB  | TRP B 698 | -9.125  | -21.455 | -31.255 | 1.00 | 0.00 | A | C |
| ATOM | 4530 | CG  | TRP B 698 | -10.382 | -22.257 | -31.017 | 1.00 | 0.00 | A | C |
| ATOM | 4531 | CD1 | TRP B 698 | -10.997 | -22.588 | -29.853 | 1.00 | 0.00 | A | C |
| ATOM | 4532 | NE1 | TRP B 698 | -12.151 | -23.289 | -30.112 | 1.00 | 0.00 | A | N |
| ATOM | 4533 | CE2 | TRP B 698 | -12.282 | -23.429 | -31.475 | 1.00 | 0.00 | A | C |
| ATOM | 4534 | CD2 | TRP B 698 | -11.191 | -22.799 | -32.073 | 1.00 | 0.00 | A | C |
| ATOM | 4535 | CE3 | TRP B 698 | -11.043 | -22.772 | -33.429 | 1.00 | 0.00 | A | C |
| ATOM | 4536 | CZ3 | TRP B 698 | -12.013 | -23.393 | -34.184 | 1.00 | 0.00 | A | C |
| ATOM | 4537 | CZ2 | TRP B 698 | -13.244 | -24.040 | -32.225 | 1.00 | 0.00 | A | C |
| ATOM | 4538 | CH2 | TRP B 698 | -13.091 | -24.014 | -33.592 | 1.00 | 0.00 | A | C |
| ATOM | 4539 | C   | TRP B 698 | -8.010  | -23.507 | -31.860 | 1.00 | 0.00 | A | C |
| ATOM | 4540 | O   | TRP B 698 | -8.214  | -24.563 | -31.266 | 1.00 | 0.00 | A | O |

|      |      |     |           |         |         |         |      |      |   |   |
|------|------|-----|-----------|---------|---------|---------|------|------|---|---|
| ATOM | 4541 | N   | LYS B 699 | -7.959  | -23.417 | -33.199 | 1.00 | 0.00 | A | N |
| ATOM | 4542 | CA  | LYS B 699 | -8.259  | -24.551 | -34.017 | 1.00 | 0.00 | A | C |
| ATOM | 4543 | CB  | LYS B 699 | -8.395  | -24.201 | -35.511 | 1.00 | 0.00 | A | C |
| ATOM | 4544 | CG  | LYS B 699 | -9.346  | -25.137 | -36.269 | 1.00 | 0.00 | A | C |
| ATOM | 4545 | CD  | LYS B 699 | -9.037  | -26.631 | -36.144 | 1.00 | 0.00 | A | C |
| ATOM | 4546 | CE  | LYS B 699 | -10.109 | -27.523 | -36.783 | 1.00 | 0.00 | A | C |
| ATOM | 4547 | NZ  | LYS B 699 | -9.847  | -28.947 | -36.473 | 1.00 | 0.00 | A | N |
| ATOM | 4548 | C   | LYS B 699 | -7.241  | -25.660 | -33.894 | 1.00 | 0.00 | A | C |
| ATOM | 4549 | O   | LYS B 699 | -7.621  | -26.823 | -33.780 | 1.00 | 0.00 | A | O |
| ATOM | 4550 | N   | LEU B 700 | -5.924  | -25.352 | -33.913 | 1.00 | 0.00 | A | N |
| ATOM | 4551 | CA  | LEU B 700 | -4.926  | -26.398 | -33.951 | 1.00 | 0.00 | A | C |
| ATOM | 4552 | CB  | LEU B 700 | -3.508  | -25.878 | -34.280 | 1.00 | 0.00 | A | C |
| ATOM | 4553 | CG  | LEU B 700 | -2.771  | -25.078 | -33.184 | 1.00 | 0.00 | A | C |
| ATOM | 4554 | CD1 | LEU B 700 | -2.237  | -25.977 | -32.054 | 1.00 | 0.00 | A | C |
| ATOM | 4555 | CD2 | LEU B 700 | -1.662  | -24.213 | -33.800 | 1.00 | 0.00 | A | C |
| ATOM | 4556 | C   | LEU B 700 | -4.878  | -27.217 | -32.696 | 1.00 | 0.00 | A | C |
| ATOM | 4557 | O   | LEU B 700 | -4.790  | -28.446 | -32.757 | 1.00 | 0.00 | A | O |
| ATOM | 4558 | N   | GLN B 701 | -4.938  | -26.553 | -31.528 | 1.00 | 0.00 | A | N |
| ATOM | 4559 | CA  | GLN B 701 | -4.840  | -27.157 | -30.226 | 1.00 | 0.00 | A | C |
| ATOM | 4560 | CB  | GLN B 701 | -4.739  | -26.136 | -29.088 | 1.00 | 0.00 | A | C |
| ATOM | 4561 | CG  | GLN B 701 | -5.966  | -25.246 | -28.928 | 1.00 | 0.00 | A | C |
| ATOM | 4562 | CD  | GLN B 701 | -5.661  | -24.320 | -27.764 | 1.00 | 0.00 | A | C |
| ATOM | 4563 | OE1 | GLN B 701 | -4.573  | -24.384 | -27.190 | 1.00 | 0.00 | A | O |
| ATOM | 4564 | NE2 | GLN B 701 | -6.626  | -23.436 | -27.402 | 1.00 | 0.00 | A | N |
| ATOM | 4565 | C   | GLN B 701 | -6.026  | -28.030 | -29.985 | 1.00 | 0.00 | A | C |
| ATOM | 4566 | O   | GLN B 701 | -5.923  | -29.061 | -29.322 | 1.00 | 0.00 | A | O |
| ATOM | 4567 | N   | ARG B 702 | -7.199  | -27.626 | -30.492 | 1.00 | 0.00 | A | N |
| ATOM | 4568 | CA  | ARG B 702 | -8.358  | -28.431 | -30.269 | 1.00 | 0.00 | A | C |
| ATOM | 4569 | CB  | ARG B 702 | -9.646  | -27.791 | -30.824 | 1.00 | 0.00 | A | C |
| ATOM | 4570 | CG  | ARG B 702 | -10.909 | -28.615 | -30.555 | 1.00 | 0.00 | A | C |
| ATOM | 4571 | CD  | ARG B 702 | -12.191 | -27.782 | -30.474 | 1.00 | 0.00 | A | C |
| ATOM | 4572 | NE  | ARG B 702 | -12.625 | -27.405 | -31.847 | 1.00 | 0.00 | A | N |
| ATOM | 4573 | CZ  | ARG B 702 | -13.884 | -26.909 | -32.022 | 1.00 | 0.00 | A | C |
| ATOM | 4574 | NH1 | ARG B 702 | -14.704 | -26.747 | -30.940 | 1.00 | 0.00 | A | N |
| ATOM | 4575 | NH2 | ARG B 702 | -14.327 | -26.565 | -33.263 | 1.00 | 0.00 | A | N |
| ATOM | 4576 | C   | ARG B 702 | -8.119  | -29.760 | -30.922 | 1.00 | 0.00 | A | C |
| ATOM | 4577 | O   | ARG B 702 | -8.392  | -30.802 | -30.332 | 1.00 | 0.00 | A | O |
| ATOM | 4578 | N   | ALA B 703 | -7.540  | -29.766 | -32.135 | 1.00 | 0.00 | A | N |

|      |      |     |           |         |         |         |      |      |   |   |
|------|------|-----|-----------|---------|---------|---------|------|------|---|---|
| ATOM | 4579 | CA  | ALA B 703 | -7.324  | -30.997 | -32.841 | 1.00 | 0.00 | A | C |
| ATOM | 4580 | CB  | ALA B 703 | -6.636  | -30.804 | -34.202 | 1.00 | 0.00 | A | C |
| ATOM | 4581 | C   | ALA B 703 | -6.440  | -31.875 | -32.018 | 1.00 | 0.00 | A | C |
| ATOM | 4582 | O   | ALA B 703 | -6.633  | -33.088 | -31.956 | 1.00 | 0.00 | A | O |
| ATOM | 4583 | N   | ILE B 704 | -5.426  | -31.282 | -31.365 | 1.00 | 0.00 | A | N |
| ATOM | 4584 | CA  | ILE B 704 | -4.532  | -32.057 | -30.561 | 1.00 | 0.00 | A | C |
| ATOM | 4585 | CB  | ILE B 704 | -3.436  | -31.241 | -29.941 | 1.00 | 0.00 | A | C |
| ATOM | 4586 | CG2 | ILE B 704 | -2.680  | -32.133 | -28.945 | 1.00 | 0.00 | A | C |
| ATOM | 4587 | CG1 | ILE B 704 | -2.536  | -30.633 | -31.027 | 1.00 | 0.00 | A | C |
| ATOM | 4588 | CD  | ILE B 704 | -1.564  | -29.585 | -30.488 | 1.00 | 0.00 | A | C |
| ATOM | 4589 | C   | ILE B 704 | -5.304  | -32.677 | -29.439 | 1.00 | 0.00 | A | C |
| ATOM | 4590 | O   | ILE B 704 | -5.104  | -33.846 | -29.116 | 1.00 | 0.00 | A | O |
| ATOM | 4591 | N   | THR B 705 | -6.214  | -31.907 | -28.808 | 1.00 | 0.00 | A | N |
| ATOM | 4592 | CA  | THR B 705 | -6.916  | -32.443 | -27.678 | 1.00 | 0.00 | A | C |
| ATOM | 4593 | CB  | THR B 705 | -7.796  | -31.456 | -26.959 | 1.00 | 0.00 | A | C |
| ATOM | 4594 | OG1 | THR B 705 | -8.091  | -31.947 | -25.660 | 1.00 | 0.00 | A | O |
| ATOM | 4595 | CG2 | THR B 705 | -9.111  | -31.267 | -27.733 | 1.00 | 0.00 | A | C |
| ATOM | 4596 | C   | THR B 705 | -7.754  | -33.597 | -28.129 | 1.00 | 0.00 | A | C |
| ATOM | 4597 | O   | THR B 705 | -7.863  | -34.598 | -27.425 | 1.00 | 0.00 | A | O |
| ATOM | 4598 | N   | ILE B 706 | -8.378  | -33.483 | -29.316 | 1.00 | 0.00 | A | N |
| ATOM | 4599 | CA  | ILE B 706 | -9.224  | -34.532 | -29.807 | 1.00 | 0.00 | A | C |
| ATOM | 4600 | CB  | ILE B 706 | -9.961  | -34.147 | -31.054 | 1.00 | 0.00 | A | C |
| ATOM | 4601 | CG2 | ILE B 706 | -10.621 | -35.408 | -31.630 | 1.00 | 0.00 | A | C |
| ATOM | 4602 | CG1 | ILE B 706 | -10.945 | -33.002 | -30.750 | 1.00 | 0.00 | A | C |
| ATOM | 4603 | CD  | ILE B 706 | -11.579 | -32.373 | -31.989 | 1.00 | 0.00 | A | C |
| ATOM | 4604 | C   | ILE B 706 | -8.426  | -35.764 | -30.096 | 1.00 | 0.00 | A | C |
| ATOM | 4605 | O   | ILE B 706 | -8.828  | -36.870 | -29.747 | 1.00 | 0.00 | A | O |
| ATOM | 4606 | N   | LEU B 707 | -7.261  | -35.615 | -30.752 | 1.00 | 0.00 | A | N |
| ATOM | 4607 | CA  | LEU B 707 | -6.524  | -36.778 | -31.150 | 1.00 | 0.00 | A | C |
| ATOM | 4608 | CB  | LEU B 707 | -5.485  | -36.464 | -32.236 | 1.00 | 0.00 | A | C |
| ATOM | 4609 | CG  | LEU B 707 | -6.266  | -35.954 | -33.468 | 1.00 | 0.00 | A | C |
| ATOM | 4610 | CD1 | LEU B 707 | -5.437  | -35.925 | -34.759 | 1.00 | 0.00 | A | C |
| ATOM | 4611 | CD2 | LEU B 707 | -7.584  | -36.732 | -33.614 | 1.00 | 0.00 | A | C |
| ATOM | 4612 | C   | LEU B 707 | -5.982  | -37.533 | -29.971 | 1.00 | 0.00 | A | C |
| ATOM | 4613 | O   | LEU B 707 | -5.978  | -38.762 | -29.974 | 1.00 | 0.00 | A | O |
| ATOM | 4614 | N   | ASP B 708 | -5.530  | -36.832 | -28.915 | 1.00 | 0.00 | A | N |
| ATOM | 4615 | CA  | ASP B 708 | -4.999  | -37.520 | -27.769 | 1.00 | 0.00 | A | C |
| ATOM | 4616 | CB  | ASP B 708 | -4.504  | -36.551 | -26.681 | 1.00 | 0.00 | A | C |

|      |      |     |           |         |         |         |      |      |   |   |
|------|------|-----|-----------|---------|---------|---------|------|------|---|---|
| ATOM | 4617 | CG  | ASP B 708 | -3.282  | -35.808 | -27.206 | 1.00 | 0.00 | A | C |
| ATOM | 4618 | OD1 | ASP B 708 | -2.776  | -36.192 | -28.294 | 1.00 | 0.00 | A | O |
| ATOM | 4619 | OD2 | ASP B 708 | -2.835  | -34.849 | -26.521 | 1.00 | 0.00 | A | O |
| ATOM | 4620 | C   | ASP B 708 | -6.080  | -38.359 | -27.162 | 1.00 | 0.00 | A | C |
| ATOM | 4621 | O   | ASP B 708 | -5.859  | -39.518 | -26.813 | 1.00 | 0.00 | A | O |
| ATOM | 4622 | N   | THR B 709 | -7.300  | -37.799 | -27.030 | 1.00 | 0.00 | A | N |
| ATOM | 4623 | CA  | THR B 709 | -8.358  | -38.543 | -26.406 | 1.00 | 0.00 | A | C |
| ATOM | 4624 | CB  | THR B 709 | -9.620  | -37.755 | -26.186 | 1.00 | 0.00 | A | C |
| ATOM | 4625 | OG1 | THR B 709 | -10.493 | -38.476 | -25.326 | 1.00 | 0.00 | A | O |
| ATOM | 4626 | CG2 | THR B 709 | -10.313 | -37.508 | -27.535 | 1.00 | 0.00 | A | C |
| ATOM | 4627 | C   | THR B 709 | -8.685  | -39.722 | -27.265 | 1.00 | 0.00 | A | C |
| ATOM | 4628 | O   | THR B 709 | -8.939  | -40.812 | -26.757 | 1.00 | 0.00 | A | O |
| ATOM | 4629 | N   | GLU B 710 | -8.669  | -39.544 | -28.600 | 1.00 | 0.00 | A | N |
| ATOM | 4630 | CA  | GLU B 710 | -9.030  | -40.629 | -29.465 | 1.00 | 0.00 | A | C |
| ATOM | 4631 | CB  | GLU B 710 | -8.939  | -40.292 | -30.964 | 1.00 | 0.00 | A | C |
| ATOM | 4632 | CG  | GLU B 710 | -9.335  | -41.477 | -31.855 | 1.00 | 0.00 | A | C |
| ATOM | 4633 | CD  | GLU B 710 | -8.962  | -41.164 | -33.299 | 1.00 | 0.00 | A | C |
| ATOM | 4634 | OE1 | GLU B 710 | -8.330  | -40.101 | -33.533 | 1.00 | 0.00 | A | O |
| ATOM | 4635 | OE2 | GLU B 710 | -9.298  | -41.994 | -34.188 | 1.00 | 0.00 | A | O |
| ATOM | 4636 | C   | GLU B 710 | -8.094  | -41.768 | -29.233 | 1.00 | 0.00 | A | C |
| ATOM | 4637 | O   | GLU B 710 | -8.530  | -42.915 | -29.140 | 1.00 | 0.00 | A | O |
| ATOM | 4638 | N   | LYS B 711 | -6.778  | -41.495 | -29.139 | 1.00 | 0.00 | A | N |
| ATOM | 4639 | CA  | LYS B 711 | -5.841  | -42.567 | -28.947 | 1.00 | 0.00 | A | C |
| ATOM | 4640 | CB  | LYS B 711 | -4.370  | -42.126 | -29.028 | 1.00 | 0.00 | A | C |
| ATOM | 4641 | CG  | LYS B 711 | -3.892  | -41.846 | -30.455 | 1.00 | 0.00 | A | C |
| ATOM | 4642 | CD  | LYS B 711 | -3.973  | -43.064 | -31.383 | 1.00 | 0.00 | A | C |
| ATOM | 4643 | CE  | LYS B 711 | -5.065  | -42.959 | -32.451 | 1.00 | 0.00 | A | C |
| ATOM | 4644 | NZ  | LYS B 711 | -6.396  | -42.841 | -31.815 | 1.00 | 0.00 | A | N |
| ATOM | 4645 | C   | LYS B 711 | -6.046  | -43.223 | -27.606 | 1.00 | 0.00 | A | C |
| ATOM | 4646 | O   | LYS B 711 | -6.003  | -44.447 | -27.505 | 1.00 | 0.00 | A | O |
| ATOM | 4647 | N   | SER B 712 | -6.257  | -42.420 | -26.542 | 1.00 | 0.00 | A | N |
| ATOM | 4648 | CA  | SER B 712 | -6.402  | -42.885 | -25.181 | 1.00 | 0.00 | A | C |
| ATOM | 4649 | CB  | SER B 712 | -6.165  | -41.763 | -24.154 | 1.00 | 0.00 | A | C |
| ATOM | 4650 | OG  | SER B 712 | -6.302  | -42.272 | -22.835 | 1.00 | 0.00 | A | O |
| ATOM | 4651 | C   | SER B 712 | -7.772  | -43.446 | -24.933 | 1.00 | 0.00 | A | C |
| ATOM | 4652 | O   | SER B 712 | -8.042  | -44.002 | -23.870 | 1.00 | 0.00 | A | O |
| ATOM | 4653 | N   | PHE B 713 | -8.671  | -43.324 | -25.918 | 1.00 | 0.00 | A | N |
| ATOM | 4654 | CA  | PHE B 713 | -10.048 | -43.723 | -25.826 | 1.00 | 0.00 | A | C |

|      |      |     |           |         |         |         |      |      |   |   |
|------|------|-----|-----------|---------|---------|---------|------|------|---|---|
| ATOM | 4655 | CB  | PHE B 713 | -10.907 | -43.242 | -27.005 | 1.00 | 0.00 | A | C |
| ATOM | 4656 | CG  | PHE B 713 | -12.325 | -43.446 | -26.595 | 1.00 | 0.00 | A | C |
| ATOM | 4657 | CD1 | PHE B 713 | -12.899 | -42.592 | -25.680 | 1.00 | 0.00 | A | C |
| ATOM | 4658 | CE1 | PHE B 713 | -14.206 | -42.754 | -25.286 | 1.00 | 0.00 | A | C |
| ATOM | 4659 | CZ  | PHE B 713 | -14.954 | -43.778 | -25.811 | 1.00 | 0.00 | A | C |
| ATOM | 4660 | CD2 | PHE B 713 | -13.083 | -44.467 | -27.120 | 1.00 | 0.00 | A | C |
| ATOM | 4661 | CE2 | PHE B 713 | -14.391 | -44.633 | -26.729 | 1.00 | 0.00 | A | C |
| ATOM | 4662 | C   | PHE B 713 | -10.145 | -45.218 | -25.750 | 1.00 | 0.00 | A | C |
| ATOM | 4663 | O   | PHE B 713 | -11.220 | -45.754 | -25.485 | 1.00 | 0.00 | A | O |
| ATOM | 4664 | N   | LEU B 714 | -9.027  | -45.927 | -25.998 | 1.00 | 0.00 | A | N |
| ATOM | 4665 | CA  | LEU B 714 | -8.997  | -47.357 | -26.144 | 1.00 | 0.00 | A | C |
| ATOM | 4666 | CB  | LEU B 714 | -9.931  | -48.156 | -25.211 | 1.00 | 0.00 | A | C |
| ATOM | 4667 | CG  | LEU B 714 | -9.445  | -48.295 | -23.756 | 1.00 | 0.00 | A | C |
| ATOM | 4668 | CD1 | LEU B 714 | -8.143  | -49.110 | -23.692 | 1.00 | 0.00 | A | C |
| ATOM | 4669 | CD2 | LEU B 714 | -9.348  | -46.940 | -23.041 | 1.00 | 0.00 | A | C |
| ATOM | 4670 | C   | LEU B 714 | -9.389  | -47.676 | -27.537 | 1.00 | 0.00 | A | C |
| ATOM | 4671 | O   | LEU B 714 | -9.644  | -48.833 | -27.867 | 1.00 | 0.00 | A | O |
| ATOM | 4672 | N   | LYS B 715 | -9.411  | -46.636 | -28.393 | 1.00 | 0.00 | A | N |
| ATOM | 4673 | CA  | LYS B 715 | -9.633  | -46.857 | -29.788 | 1.00 | 0.00 | A | C |
| ATOM | 4674 | CB  | LYS B 715 | -8.533  | -47.766 | -30.348 | 1.00 | 0.00 | A | C |
| ATOM | 4675 | CG  | LYS B 715 | -7.145  | -47.237 | -29.976 | 1.00 | 0.00 | A | C |
| ATOM | 4676 | CD  | LYS B 715 | -6.059  | -48.313 | -29.957 | 1.00 | 0.00 | A | C |
| ATOM | 4677 | CE  | LYS B 715 | -4.810  | -47.890 | -29.180 | 1.00 | 0.00 | A | C |
| ATOM | 4678 | NZ  | LYS B 715 | -3.987  | -49.075 | -28.856 | 1.00 | 0.00 | A | N |
| ATOM | 4679 | C   | LYS B 715 | -10.941 | -47.548 | -29.902 | 1.00 | 0.00 | A | C |
| ATOM | 4680 | O   | LYS B 715 | -11.126 | -48.434 | -30.736 | 1.00 | 0.00 | A | O |
| ATOM | 4681 | N   | CYS B 716 | -11.897 | -47.138 | -29.051 | 1.00 | 0.00 | A | N |
| ATOM | 4682 | CA  | CYS B 716 | -13.174 | -47.773 | -29.064 | 1.00 | 0.00 | A | C |
| ATOM | 4683 | CB  | CYS B 716 | -14.123 | -47.301 | -27.950 | 1.00 | 0.00 | A | C |
| ATOM | 4684 | SG  | CYS B 716 | -13.537 | -47.754 | -26.290 | 1.00 | 0.00 | A | S |
| ATOM | 4685 | C   | CYS B 716 | -13.801 | -47.448 | -30.377 | 1.00 | 0.00 | A | C |
| ATOM | 4686 | O   | CYS B 716 | -13.269 | -46.641 | -31.138 | 1.00 | 0.00 | A | O |
| ATOM | 4687 | N   | MET B 717 | -14.937 | -48.103 | -30.680 | 1.00 | 0.00 | A | N |
| ATOM | 4688 | CA  | MET B 717 | -15.577 | -47.899 | -31.946 | 1.00 | 0.00 | A | C |
| ATOM | 4689 | CB  | MET B 717 | -16.956 | -48.564 | -32.073 | 1.00 | 0.00 | A | C |
| ATOM | 4690 | CG  | MET B 717 | -17.684 | -48.146 | -33.355 | 1.00 | 0.00 | A | C |
| ATOM | 4691 | SD  | MET B 717 | -19.425 | -48.650 | -33.455 | 1.00 | 0.00 | A | S |
| ATOM | 4692 | CE  | MET B 717 | -19.779 | -47.665 | -34.940 | 1.00 | 0.00 | A | C |



ATOM 4693 C MET B 717 -15.825 -46.442 -32.113 1.00 0.00 A C  
ATOM 4694 O MET B 717 -16.333 -45.775 -31.213 1.00 0.00 A O  
ATOM 4695 N ARG B 718 -15.447 -45.919 -33.293 1.00 0.00 A N  
ATOM 4696 CA ARG B 718 -15.648 -44.542 -33.619 1.00 0.00 A C  
ATOM 4697 CB ARG B 718 -14.632 -43.619 -32.924 1.00 0.00 A C  
ATOM 4698 CG ARG B 718 -14.789 -42.133 -33.238 1.00 0.00 A C  
ATOM 4699 CD ARG B 718 -13.765 -41.275 -32.493 1.00 0.00 A C  
ATOM 4700 NE ARG B 718 -14.132 -41.314 -31.048 1.00 0.00 A N  
ATOM 4701 CZ ARG B 718 -13.180 -41.080 -30.098 1.00 0.00 A C  
ATOM 4702 NH1 ARG B 718 -11.889 -40.837 -30.472 1.00 0.00 A N  
ATOM 4703 NH2 ARG B 718 -13.521 -41.070 -28.776 1.00 0.00 A N  
ATOM 4704 C ARG B 718 -15.430 -44.438 -35.090 1.00 0.00 A C  
ATOM 4705 O ARG B 718 -14.767 -45.292 -35.676 1.00 0.00 A O  
ATOM 4706 C LYS B 719 -14.462 -42.457 -37.290 1.00 0.00 A C  
ATOM 4707 OT1 LYS B 719 -14.190 -42.130 -36.385 0.00 0.00 A O  
ATOM 4708 OT2 LYS B 719 -14.213 -42.399 -38.257 0.00 0.00 A O  
ATOM 4709 N LYS B 719 -15.998 -43.410 -35.752 1.00 0.00 A N  
ATOM 4710 CA LYS B 719 -15.678 -43.356 -37.146 1.00 0.00 A C  
ATOM 4711 CB LYS B 719 -16.751 -42.797 -38.088 1.00 0.00 A C  
ATOM 4712 CG LYS B 719 -16.214 -42.825 -39.523 1.00 0.00 A C  
ATOM 4713 CD LYS B 719 -15.911 -44.247 -40.008 1.00 0.00 A C  
ATOM 4714 CE LYS B 719 -14.673 -44.356 -40.908 1.00 0.00 A C  
ATOM 4715 NZ LYS B 719 -14.838 -43.527 -42.121 1.00 0.00 A N  
ATOM 4716 N LEU A 112 -54.905 33.567 -75.286 1.00 0.00 B N  
ATOM 4717 CA LEU A 112 -54.857 32.186 -75.778 1.00 0.00 B C  
ATOM 4718 CB LEU A 112 -54.451 32.176 -77.261 1.00 0.00 B C  
ATOM 4719 CG LEU A 112 -55.438 32.934 -78.175 1.00 0.00 B C  
ATOM 4720 CD1 LEU A 112 -55.016 32.857 -79.652 1.00 0.00 B C  
ATOM 4721 CD2 LEU A 112 -56.884 32.472 -77.944 1.00 0.00 B C  
ATOM 4722 C LEU A 112 -53.825 31.430 -75.012 1.00 0.00 B C  
ATOM 4723 O LEU A 112 -53.695 30.216 -75.159 1.00 0.00 B O  
ATOM 4724 N TYR A 113 -53.051 32.142 -74.168 1.00 0.00 B N  
ATOM 4725 CA TYR A 113 -52.013 31.467 -73.452 1.00 0.00 B C  
ATOM 4726 CB TYR A 113 -50.604 31.861 -73.926 1.00 0.00 B C  
ATOM 4727 CG TYR A 113 -50.392 31.336 -75.302 1.00 0.00 B C  
ATOM 4728 CD1 TYR A 113 -50.955 31.966 -76.386 1.00 0.00 B C  
ATOM 4729 CE1 TYR A 113 -50.751 31.479 -77.655 1.00 0.00 B C  
ATOM 4730 CZ TYR A 113 -49.978 30.357 -77.845 1.00 0.00 B C

ATOM 4731 OH TYR A 113 -49.767 29.853 -79.146 1.00 0.00 B O  
ATOM 4732 CD2 TYR A 113 -49.616 30.217 -75.503 1.00 0.00 B C  
ATOM 4733 CE2 TYR A 113 -49.408 29.725 -76.769 1.00 0.00 B C  
ATOM 4734 C TYR A 113 -52.055 31.831 -72.006 1.00 0.00 B C  
ATOM 4735 O TYR A 113 -52.121 33.007 -71.647 1.00 0.00 B O  
ATOM 4736 N ASP A 114 -52.043 30.802 -71.138 1.00 0.00 B N  
ATOM 4737 CA ASP A 114 -51.884 30.993 -69.728 1.00 0.00 B C  
ATOM 4738 CB ASP A 114 -52.907 30.214 -68.884 1.00 0.00 B C  
ATOM 4739 CG ASP A 114 -52.810 28.743 -69.241 1.00 0.00 B C  
ATOM 4740 OD1 ASP A 114 -53.043 28.411 -70.437 1.00 0.00 B O  
ATOM 4741 OD2 ASP A 114 -52.520 27.928 -68.328 1.00 0.00 B O  
ATOM 4742 C ASP A 114 -50.485 30.550 -69.405 1.00 0.00 B C  
ATOM 4743 O ASP A 114 -49.767 30.058 -70.274 1.00 0.00 B O  
ATOM 4744 N ARG A 115 -50.050 30.712 -68.141 1.00 0.00 B N  
ATOM 4745 CA ARG A 115 -48.705 30.354 -67.775 1.00 0.00 B C  
ATOM 4746 CB ARG A 115 -48.396 30.678 -66.303 1.00 0.00 B C  
ATOM 4747 CG ARG A 115 -46.976 30.319 -65.857 1.00 0.00 B C  
ATOM 4748 CD ARG A 115 -46.676 30.749 -64.418 1.00 0.00 B C  
ATOM 4749 NE ARG A 115 -47.350 29.786 -63.500 1.00 0.00 B N  
ATOM 4750 CZ ARG A 115 -46.673 28.689 -63.048 1.00 0.00 B C  
ATOM 4751 NH1 ARG A 115 -45.377 28.490 -63.418 1.00 0.00 B N  
ATOM 4752 NH2 ARG A 115 -47.293 27.798 -62.218 1.00 0.00 B N  
ATOM 4753 C ARG A 115 -48.526 28.878 -67.971 1.00 0.00 B C  
ATOM 4754 O ARG A 115 -47.501 28.427 -68.480 1.00 0.00 B O  
ATOM 4755 N ARG A 116 -49.551 28.099 -67.595 1.00 0.00 B N  
ATOM 4756 CA ARG A 116 -49.489 26.666 -67.606 1.00 0.00 B C  
ATOM 4757 CB ARG A 116 -50.807 26.053 -67.106 1.00 0.00 B C  
ATOM 4758 CG ARG A 116 -50.634 24.704 -66.410 1.00 0.00 B C  
ATOM 4759 CD ARG A 116 -49.927 23.630 -67.228 1.00 0.00 B C  
ATOM 4760 NE ARG A 116 -49.589 22.549 -66.261 1.00 0.00 B N  
ATOM 4761 CZ ARG A 116 -48.436 22.638 -65.532 1.00 0.00 B C  
ATOM 4762 NH1 ARG A 116 -47.559 23.654 -65.765 1.00 0.00 B N  
ATOM 4763 NH2 ARG A 116 -48.168 21.712 -64.563 1.00 0.00 B N  
ATOM 4764 C ARG A 116 -49.273 26.183 -69.008 1.00 0.00 B C  
ATOM 4765 O ARG A 116 -48.466 25.284 -69.244 1.00 0.00 B O  
ATOM 4766 N SER A 117 -49.976 26.786 -69.986 1.00 0.00 B N  
ATOM 4767 CA SER A 117 -49.930 26.310 -71.339 1.00 0.00 B C  
ATOM 4768 CB SER A 117 -50.847 27.108 -72.283 1.00 0.00 B C

ATOM 4769 OG SER A 117 -50.448 28.471 -72.328 1.00 0.00 B O  
ATOM 4770 C SER A 117 -48.533 26.356 -71.889 1.00 0.00 B C  
ATOM 4771 O SER A 117 -48.074 25.382 -72.482 1.00 0.00 B O  
ATOM 4772 N ILE A 118 -47.818 27.484 -71.714 1.00 0.00 B N  
ATOM 4773 CA ILE A 118 -46.495 27.637 -72.262 1.00 0.00 B C  
ATOM 4774 CB ILE A 118 -45.944 29.023 -72.114 1.00 0.00 B C  
ATOM 4775 CG2 ILE A 118 -44.505 29.008 -72.658 1.00 0.00 B C  
ATOM 4776 CG1 ILE A 118 -46.849 30.046 -72.819 1.00 0.00 B C  
ATOM 4777 CD ILE A 118 -46.508 31.494 -72.469 1.00 0.00 B C  
ATOM 4778 C ILE A 118 -45.522 26.712 -71.596 1.00 0.00 B C  
ATOM 4779 O ILE A 118 -44.676 26.107 -72.254 1.00 0.00 B O  
ATOM 4780 N PHE A 119 -45.621 26.570 -70.261 1.00 0.00 B N  
ATOM 4781 CA PHE A 119 -44.690 25.777 -69.510 1.00 0.00 B C  
ATOM 4782 CB PHE A 119 -45.017 25.738 -68.003 1.00 0.00 B C  
ATOM 4783 CG PHE A 119 -44.422 26.937 -67.342 1.00 0.00 B C  
ATOM 4784 CD1 PHE A 119 -44.910 28.200 -67.573 1.00 0.00 B C  
ATOM 4785 CE1 PHE A 119 -44.345 29.294 -66.962 1.00 0.00 B C  
ATOM 4786 CZ PHE A 119 -43.274 29.140 -66.115 1.00 0.00 B C  
ATOM 4787 CD2 PHE A 119 -43.335 26.794 -66.507 1.00 0.00 B C  
ATOM 4788 CE2 PHE A 119 -42.765 27.882 -65.891 1.00 0.00 B C  
ATOM 4789 C PHE A 119 -44.707 24.377 -70.026 1.00 0.00 B C  
ATOM 4790 O PHE A 119 -43.654 23.748 -70.139 1.00 0.00 B O  
ATOM 4791 N GLU A 120 -45.903 23.840 -70.322 1.00 0.00 B N  
ATOM 4792 CA GLU A 120 -46.017 22.502 -70.825 1.00 0.00 B C  
ATOM 4793 CB GLU A 120 -47.475 22.023 -70.908 1.00 0.00 B C  
ATOM 4794 CG GLU A 120 -48.147 21.894 -69.537 1.00 0.00 B C  
ATOM 4795 CD GLU A 120 -47.508 20.729 -68.788 1.00 0.00 B C  
ATOM 4796 OE1 GLU A 120 -46.261 20.581 -68.878 1.00 0.00 B O  
ATOM 4797 OE2 GLU A 120 -48.262 19.975 -68.116 1.00 0.00 B O  
ATOM 4798 C GLU A 120 -45.413 22.422 -72.196 1.00 0.00 B C  
ATOM 4799 O GLU A 120 -44.763 21.434 -72.536 1.00 0.00 B O  
ATOM 4800 N ALA A 121 -45.611 23.460 -73.027 1.00 0.00 B N  
ATOM 4801 CA ALA A 121 -45.091 23.433 -74.367 1.00 0.00 B C  
ATOM 4802 CB ALA A 121 -45.448 24.695 -75.170 1.00 0.00 B C  
ATOM 4803 C ALA A 121 -43.595 23.350 -74.303 1.00 0.00 B C  
ATOM 4804 O ALA A 121 -42.975 22.594 -75.049 1.00 0.00 B O  
ATOM 4805 N VAL A 122 -42.984 24.122 -73.386 1.00 0.00 B N  
ATOM 4806 CA VAL A 122 -41.556 24.199 -73.232 1.00 0.00 B C

|      |      |               |         |        |         |      |      |   |   |
|------|------|---------------|---------|--------|---------|------|------|---|---|
| ATOM | 4807 | CB VAL A 122  | -41.148 | 25.210 | -72.198 | 1.00 | 0.00 | B | C |
| ATOM | 4808 | CG1 VAL A 122 | -39.629 | 25.118 | -71.978 | 1.00 | 0.00 | B | C |
| ATOM | 4809 | CG2 VAL A 122 | -41.616 | 26.598 | -72.667 | 1.00 | 0.00 | B | C |
| ATOM | 4810 | C VAL A 122   | -40.997 | 22.870 | -72.817 | 1.00 | 0.00 | B | C |
| ATOM | 4811 | O VAL A 122   | -39.919 | 22.476 | -73.263 | 1.00 | 0.00 | B | O |
| ATOM | 4812 | N ALA A 123   | -41.721 | 22.128 | -71.959 | 1.00 | 0.00 | B | N |
| ATOM | 4813 | CA ALA A 123  | -41.204 | 20.891 | -71.440 | 1.00 | 0.00 | B | C |
| ATOM | 4814 | CB ALA A 123  | -42.193 | 20.187 | -70.495 | 1.00 | 0.00 | B | C |
| ATOM | 4815 | C ALA A 123   | -40.916 | 19.953 | -72.577 | 1.00 | 0.00 | B | C |
| ATOM | 4816 | O ALA A 123   | -39.942 | 19.205 | -72.553 | 1.00 | 0.00 | B | O |
| ATOM | 4817 | N GLN A 124   | -41.814 | 19.952 | -73.575 | 1.00 | 0.00 | B | N |
| ATOM | 4818 | CA GLN A 124  | -41.826 | 19.163 | -74.778 | 1.00 | 0.00 | B | C |
| ATOM | 4819 | CB GLN A 124  | -43.206 | 19.172 | -75.455 | 1.00 | 0.00 | B | C |
| ATOM | 4820 | CG GLN A 124  | -44.323 | 18.613 | -74.574 | 1.00 | 0.00 | B | C |
| ATOM | 4821 | CD GLN A 124  | -45.620 | 18.715 | -75.365 | 1.00 | 0.00 | B | C |
| ATOM | 4822 | OE1 GLN A 124 | -46.171 | 17.713 | -75.816 | 1.00 | 0.00 | B | O |
| ATOM | 4823 | NE2 GLN A 124 | -46.125 | 19.966 | -75.542 | 1.00 | 0.00 | B | N |
| ATOM | 4824 | C GLN A 124   | -40.841 | 19.639 | -75.808 | 1.00 | 0.00 | B | C |
| ATOM | 4825 | O GLN A 124   | -40.494 | 18.881 | -76.714 | 1.00 | 0.00 | B | O |
| ATOM | 4826 | N ASN A 125   | -40.403 | 20.912 | -75.746 | 1.00 | 0.00 | B | N |
| ATOM | 4827 | CA ASN A 125  | -39.576 | 21.455 | -76.791 | 1.00 | 0.00 | B | C |
| ATOM | 4828 | CB ASN A 125  | -38.352 | 20.579 | -77.110 | 1.00 | 0.00 | B | C |
| ATOM | 4829 | CG ASN A 125  | -37.435 | 21.359 | -78.040 | 1.00 | 0.00 | B | C |
| ATOM | 4830 | OD1 ASN A 125 | -36.976 | 22.447 | -77.696 | 1.00 | 0.00 | B | O |
| ATOM | 4831 | ND2 ASN A 125 | -37.161 | 20.796 | -79.247 | 1.00 | 0.00 | B | N |
| ATOM | 4832 | C ASN A 125   | -40.409 | 21.566 | -78.034 | 1.00 | 0.00 | B | C |
| ATOM | 4833 | O ASN A 125   | -39.948 | 21.267 | -79.136 | 1.00 | 0.00 | B | O |
| ATOM | 4834 | N ASN A 126   | -41.672 | 22.020 | -77.883 | 1.00 | 0.00 | B | N |
| ATOM | 4835 | CA ASN A 126  | -42.556 | 22.116 | -79.008 | 1.00 | 0.00 | B | C |
| ATOM | 4836 | CB ASN A 126  | -43.974 | 21.609 | -78.683 | 1.00 | 0.00 | B | C |
| ATOM | 4837 | CG ASN A 126  | -44.655 | 21.211 | -79.981 | 1.00 | 0.00 | B | C |
| ATOM | 4838 | OD1 ASN A 126 | -44.039 | 21.222 | -81.045 | 1.00 | 0.00 | B | O |
| ATOM | 4839 | ND2 ASN A 126 | -45.960 | 20.837 | -79.894 | 1.00 | 0.00 | B | N |
| ATOM | 4840 | C ASN A 126   | -42.660 | 23.556 | -79.437 | 1.00 | 0.00 | B | C |
| ATOM | 4841 | O ASN A 126   | -43.154 | 24.410 | -78.703 | 1.00 | 0.00 | B | O |
| ATOM | 4842 | N CYS A 127   | -42.133 | 23.859 | -80.642 | 1.00 | 0.00 | B | N |
| ATOM | 4843 | CA CYS A 127  | -42.152 | 25.162 | -81.253 | 1.00 | 0.00 | B | C |
| ATOM | 4844 | CB CYS A 127  | -41.164 | 25.289 | -82.423 | 1.00 | 0.00 | B | C |

|      |      |     |     |   |     |         |        |         |      |      |   |   |
|------|------|-----|-----|---|-----|---------|--------|---------|------|------|---|---|
| ATOM | 4845 | SG  | CYS | A | 127 | -39.440 | 25.305 | -81.859 | 1.00 | 0.00 | B | S |
| ATOM | 4846 | C   | CYS | A | 127 | -43.510 | 25.522 | -81.787 | 1.00 | 0.00 | B | C |
| ATOM | 4847 | O   | CYS | A | 127 | -43.835 | 26.702 | -81.892 | 1.00 | 0.00 | B | O |
| ATOM | 4848 | N   | GLN | A | 128 | -44.310 | 24.528 | -82.217 | 1.00 | 0.00 | B | N |
| ATOM | 4849 | CA  | GLN | A | 128 | -45.565 | 24.812 | -82.869 | 1.00 | 0.00 | B | C |
| ATOM | 4850 | CB  | GLN | A | 128 | -46.159 | 23.601 | -83.616 | 1.00 | 0.00 | B | C |
| ATOM | 4851 | CG  | GLN | A | 128 | -45.342 | 23.227 | -84.855 | 1.00 | 0.00 | B | C |
| ATOM | 4852 | CD  | GLN | A | 128 | -46.096 | 22.180 | -85.667 | 1.00 | 0.00 | B | C |
| ATOM | 4853 | OE1 | GLN | A | 128 | -45.492 | 21.285 | -86.256 | 1.00 | 0.00 | B | O |
| ATOM | 4854 | NE2 | GLN | A | 128 | -47.450 | 22.298 | -85.711 | 1.00 | 0.00 | B | N |
| ATOM | 4855 | C   | GLN | A | 128 | -46.620 | 25.395 | -81.969 | 1.00 | 0.00 | B | C |
| ATOM | 4856 | O   | GLN | A | 128 | -47.315 | 26.333 | -82.359 | 1.00 | 0.00 | B | O |
| ATOM | 4857 | N   | ASP | A | 129 | -46.757 | 24.899 | -80.727 | 1.00 | 0.00 | B | N |
| ATOM | 4858 | CA  | ASP | A | 129 | -47.813 | 25.352 | -79.859 | 1.00 | 0.00 | B | C |
| ATOM | 4859 | CB  | ASP | A | 129 | -47.790 | 24.654 | -78.488 | 1.00 | 0.00 | B | C |
| ATOM | 4860 | CG  | ASP | A | 129 | -48.182 | 23.197 | -78.695 | 1.00 | 0.00 | B | C |
| ATOM | 4861 | OD1 | ASP | A | 129 | -48.711 | 22.879 | -79.794 | 1.00 | 0.00 | B | O |
| ATOM | 4862 | OD2 | ASP | A | 129 | -47.958 | 22.383 | -77.760 | 1.00 | 0.00 | B | O |
| ATOM | 4863 | C   | ASP | A | 129 | -47.638 | 26.824 | -79.636 | 1.00 | 0.00 | B | C |
| ATOM | 4864 | O   | ASP | A | 129 | -48.579 | 27.535 | -79.288 | 1.00 | 0.00 | B | O |
| ATOM | 4865 | N   | LEU | A | 130 | -46.379 | 27.270 | -79.747 | 1.00 | 0.00 | B | N |
| ATOM | 4866 | CA  | LEU | A | 130 | -45.869 | 28.606 | -79.628 | 1.00 | 0.00 | B | C |
| ATOM | 4867 | CB  | LEU | A | 130 | -44.355 | 28.633 | -79.354 | 1.00 | 0.00 | B | C |
| ATOM | 4868 | CG  | LEU | A | 130 | -43.991 | 28.047 | -77.973 | 1.00 | 0.00 | B | C |
| ATOM | 4869 | CD1 | LEU | A | 130 | -42.477 | 28.081 | -77.719 | 1.00 | 0.00 | B | C |
| ATOM | 4870 | CD2 | LEU | A | 130 | -44.783 | 28.741 | -76.853 | 1.00 | 0.00 | B | C |
| ATOM | 4871 | C   | LEU | A | 130 | -46.154 | 29.451 | -80.830 | 1.00 | 0.00 | B | C |
| ATOM | 4872 | O   | LEU | A | 130 | -45.854 | 30.643 | -80.816 | 1.00 | 0.00 | B | O |
| ATOM | 4873 | N   | GLU | A | 131 | -46.622 | 28.859 | -81.944 | 1.00 | 0.00 | B | N |
| ATOM | 4874 | CA  | GLU | A | 131 | -46.808 | 29.609 | -83.158 | 1.00 | 0.00 | B | C |
| ATOM | 4875 | CB  | GLU | A | 131 | -47.360 | 28.729 | -84.287 | 1.00 | 0.00 | B | C |
| ATOM | 4876 | CG  | GLU | A | 131 | -46.390 | 27.604 | -84.665 | 1.00 | 0.00 | B | C |
| ATOM | 4877 | CD  | GLU | A | 131 | -47.068 | 26.700 | -85.683 | 1.00 | 0.00 | B | C |
| ATOM | 4878 | OE1 | GLU | A | 131 | -47.766 | 25.742 | -85.256 | 1.00 | 0.00 | B | O |
| ATOM | 4879 | OE2 | GLU | A | 131 | -46.899 | 26.957 | -86.905 | 1.00 | 0.00 | B | O |
| ATOM | 4880 | C   | GLU | A | 131 | -47.745 | 30.770 | -82.940 | 1.00 | 0.00 | B | C |
| ATOM | 4881 | O   | GLU | A | 131 | -47.475 | 31.878 | -83.400 | 1.00 | 0.00 | B | O |
| ATOM | 4882 | N   | SER | A | 132 | -48.875 | 30.560 | -82.238 | 1.00 | 0.00 | B | N |

|      |      |     |           |         |        |         |      |      |   |   |
|------|------|-----|-----------|---------|--------|---------|------|------|---|---|
| ATOM | 4883 | CA  | SER A 132 | -49.846 | 31.600 | -82.008 | 1.00 | 0.00 | B | C |
| ATOM | 4884 | CB  | SER A 132 | -51.229 | 31.042 | -81.623 | 1.00 | 0.00 | B | C |
| ATOM | 4885 | OG  | SER A 132 | -51.779 | 30.308 | -82.707 | 1.00 | 0.00 | B | O |
| ATOM | 4886 | C   | SER A 132 | -49.419 | 32.525 | -80.900 | 1.00 | 0.00 | B | C |
| ATOM | 4887 | O   | SER A 132 | -50.162 | 33.438 | -80.543 | 1.00 | 0.00 | B | O |
| ATOM | 4888 | N   | LEU A 133 | -48.236 | 32.296 | -80.296 | 1.00 | 0.00 | B | N |
| ATOM | 4889 | CA  | LEU A 133 | -47.835 | 33.020 | -79.119 | 1.00 | 0.00 | B | C |
| ATOM | 4890 | CB  | LEU A 133 | -46.563 | 32.430 | -78.473 | 1.00 | 0.00 | B | C |
| ATOM | 4891 | CG  | LEU A 133 | -46.130 | 33.145 | -77.174 | 1.00 | 0.00 | B | C |
| ATOM | 4892 | CD1 | LEU A 133 | -47.241 | 33.089 | -76.114 | 1.00 | 0.00 | B | C |
| ATOM | 4893 | CD2 | LEU A 133 | -44.795 | 32.589 | -76.636 | 1.00 | 0.00 | B | C |
| ATOM | 4894 | C   | LEU A 133 | -47.614 | 34.499 | -79.320 | 1.00 | 0.00 | B | C |
| ATOM | 4895 | O   | LEU A 133 | -48.226 | 35.308 | -78.623 | 1.00 | 0.00 | B | O |
| ATOM | 4896 | N   | LEU A 134 | -46.796 | 34.911 | -80.311 | 1.00 | 0.00 | B | N |
| ATOM | 4897 | CA  | LEU A 134 | -46.418 | 36.291 | -80.439 | 1.00 | 0.00 | B | C |
| ATOM | 4898 | CB  | LEU A 134 | -45.485 | 36.510 | -81.644 | 1.00 | 0.00 | B | C |
| ATOM | 4899 | CG  | LEU A 134 | -44.719 | 37.852 | -81.697 | 1.00 | 0.00 | B | C |
| ATOM | 4900 | CD1 | LEU A 134 | -44.063 | 38.015 | -83.072 | 1.00 | 0.00 | B | C |
| ATOM | 4901 | CD2 | LEU A 134 | -45.546 | 39.077 | -81.289 | 1.00 | 0.00 | B | C |
| ATOM | 4902 | C   | LEU A 134 | -47.650 | 37.121 | -80.666 | 1.00 | 0.00 | B | C |
| ATOM | 4903 | O   | LEU A 134 | -47.824 | 38.178 | -80.064 | 1.00 | 0.00 | B | O |
| ATOM | 4904 | N   | LEU A 135 | -48.567 | 36.653 | -81.526 | 1.00 | 0.00 | B | N |
| ATOM | 4905 | CA  | LEU A 135 | -49.714 | 37.440 | -81.861 | 1.00 | 0.00 | B | C |
| ATOM | 4906 | CB  | LEU A 135 | -50.567 | 36.826 | -82.993 | 1.00 | 0.00 | B | C |
| ATOM | 4907 | CG  | LEU A 135 | -51.079 | 35.395 | -82.743 | 1.00 | 0.00 | B | C |
| ATOM | 4908 | CD1 | LEU A 135 | -52.153 | 35.352 | -81.646 | 1.00 | 0.00 | B | C |
| ATOM | 4909 | CD2 | LEU A 135 | -51.543 | 34.743 | -84.057 | 1.00 | 0.00 | B | C |
| ATOM | 4910 | C   | LEU A 135 | -50.574 | 37.689 | -80.654 | 1.00 | 0.00 | B | C |
| ATOM | 4911 | O   | LEU A 135 | -51.205 | 38.740 | -80.564 | 1.00 | 0.00 | B | O |
| ATOM | 4912 | N   | PHE A 136 | -50.638 | 36.735 | -79.704 | 1.00 | 0.00 | B | N |
| ATOM | 4913 | CA  | PHE A 136 | -51.504 | 36.865 | -78.560 | 1.00 | 0.00 | B | C |
| ATOM | 4914 | CB  | PHE A 136 | -51.465 | 35.611 | -77.664 | 1.00 | 0.00 | B | C |
| ATOM | 4915 | CG  | PHE A 136 | -52.066 | 35.932 | -76.337 | 1.00 | 0.00 | B | C |
| ATOM | 4916 | CD1 | PHE A 136 | -53.429 | 35.999 | -76.168 | 1.00 | 0.00 | B | C |
| ATOM | 4917 | CE1 | PHE A 136 | -53.964 | 36.299 | -74.938 | 1.00 | 0.00 | B | C |
| ATOM | 4918 | CZ  | PHE A 136 | -53.133 | 36.540 | -73.869 | 1.00 | 0.00 | B | C |
| ATOM | 4919 | CD2 | PHE A 136 | -51.242 | 36.184 | -75.264 | 1.00 | 0.00 | B | C |
| ATOM | 4920 | CE2 | PHE A 136 | -51.769 | 36.485 | -74.032 | 1.00 | 0.00 | B | C |

|      |      |     |     |   |     |         |        |         |      |      |   |   |
|------|------|-----|-----|---|-----|---------|--------|---------|------|------|---|---|
| ATOM | 4921 | C   | PHE | A | 136 | -51.168 | 38.068 | -77.722 | 1.00 | 0.00 | B | C |
| ATOM | 4922 | O   | PHE | A | 136 | -52.025 | 38.917 | -77.478 | 1.00 | 0.00 | B | O |
| ATOM | 4923 | N   | LEU | A | 137 | -49.899 | 38.200 | -77.292 | 1.00 | 0.00 | B | N |
| ATOM | 4924 | CA  | LEU | A | 137 | -49.477 | 39.277 | -76.442 | 1.00 | 0.00 | B | C |
| ATOM | 4925 | CB  | LEU | A | 137 | -48.101 | 39.108 | -75.751 | 1.00 | 0.00 | B | C |
| ATOM | 4926 | CG  | LEU | A | 137 | -46.891 | 38.815 | -76.657 | 1.00 | 0.00 | B | C |
| ATOM | 4927 | CD1 | LEU | A | 137 | -45.597 | 38.702 | -75.830 | 1.00 | 0.00 | B | C |
| ATOM | 4928 | CD2 | LEU | A | 137 | -47.128 | 37.552 | -77.488 | 1.00 | 0.00 | B | C |
| ATOM | 4929 | C   | LEU | A | 137 | -49.491 | 40.565 | -77.193 | 1.00 | 0.00 | B | C |
| ATOM | 4930 | O   | LEU | A | 137 | -49.265 | 41.620 | -76.605 | 1.00 | 0.00 | B | O |
| ATOM | 4931 | N   | GLN | A | 138 | -49.566 | 40.500 | -78.536 | 1.00 | 0.00 | B | N |
| ATOM | 4932 | CA  | GLN | A | 138 | -49.689 | 41.704 | -79.304 | 1.00 | 0.00 | B | C |
| ATOM | 4933 | CB  | GLN | A | 138 | -49.566 | 41.444 | -80.814 | 1.00 | 0.00 | B | C |
| ATOM | 4934 | CG  | GLN | A | 138 | -48.177 | 40.954 | -81.236 | 1.00 | 0.00 | B | C |
| ATOM | 4935 | CD  | GLN | A | 138 | -48.180 | 40.729 | -82.743 | 1.00 | 0.00 | B | C |
| ATOM | 4936 | OE1 | GLN | A | 138 | -49.234 | 40.706 | -83.380 | 1.00 | 0.00 | B | O |
| ATOM | 4937 | NE2 | GLN | A | 138 | -46.969 | 40.552 | -83.334 | 1.00 | 0.00 | B | N |
| ATOM | 4938 | C   | GLN | A | 138 | -51.035 | 42.329 | -79.049 | 1.00 | 0.00 | B | C |
| ATOM | 4939 | O   | GLN | A | 138 | -51.123 | 43.530 | -78.793 | 1.00 | 0.00 | B | O |
| ATOM | 4940 | N   | LYS | A | 139 | -52.126 | 41.534 | -79.118 | 1.00 | 0.00 | B | N |
| ATOM | 4941 | CA  | LYS | A | 139 | -53.433 | 42.101 | -78.904 | 1.00 | 0.00 | B | C |
| ATOM | 4942 | CB  | LYS | A | 139 | -54.593 | 41.121 | -79.120 | 1.00 | 0.00 | B | C |
| ATOM | 4943 | CG  | LYS | A | 139 | -55.929 | 41.771 | -78.745 | 1.00 | 0.00 | B | C |
| ATOM | 4944 | CD  | LYS | A | 139 | -57.151 | 40.876 | -78.932 | 1.00 | 0.00 | B | C |
| ATOM | 4945 | CE  | LYS | A | 139 | -58.431 | 41.480 | -78.349 | 1.00 | 0.00 | B | C |
| ATOM | 4946 | NZ  | LYS | A | 139 | -59.540 | 40.507 | -78.453 | 1.00 | 0.00 | B | N |
| ATOM | 4947 | C   | LYS | A | 139 | -53.593 | 42.545 | -77.488 | 1.00 | 0.00 | B | C |
| ATOM | 4948 | O   | LYS | A | 139 | -53.895 | 43.707 | -77.219 | 1.00 | 0.00 | B | O |
| ATOM | 4949 | N   | SER | A | 140 | -53.374 | 41.606 | -76.552 | 1.00 | 0.00 | B | N |
| ATOM | 4950 | CA  | SER | A | 140 | -53.558 | 41.841 | -75.149 | 1.00 | 0.00 | B | C |
| ATOM | 4951 | CB  | SER | A | 140 | -53.512 | 40.548 | -74.317 | 1.00 | 0.00 | B | C |
| ATOM | 4952 | OG  | SER | A | 140 | -52.245 | 39.922 | -74.447 | 1.00 | 0.00 | B | O |
| ATOM | 4953 | C   | SER | A | 140 | -52.478 | 42.749 | -74.664 | 1.00 | 0.00 | B | C |
| ATOM | 4954 | O   | SER | A | 140 | -52.594 | 43.360 | -73.605 | 1.00 | 0.00 | B | O |
| ATOM | 4955 | N   | LYS | A | 141 | -51.388 | 42.861 | -75.436 | 1.00 | 0.00 | B | N |
| ATOM | 4956 | CA  | LYS | A | 141 | -50.284 | 43.684 | -75.044 | 1.00 | 0.00 | B | C |
| ATOM | 4957 | CB  | LYS | A | 141 | -50.653 | 45.158 | -74.789 | 1.00 | 0.00 | B | C |
| ATOM | 4958 | CG  | LYS | A | 141 | -51.020 | 45.958 | -76.040 | 1.00 | 0.00 | B | C |

|      |      |     |     |   |     |         |        |         |      |      |   |   |
|------|------|-----|-----|---|-----|---------|--------|---------|------|------|---|---|
| ATOM | 4959 | CD  | LYS | A | 141 | -49.910 | 46.017 | -77.087 | 1.00 | 0.00 | B | C |
| ATOM | 4960 | CE  | LYS | A | 141 | -50.141 | 47.088 | -78.155 | 1.00 | 0.00 | B | C |
| ATOM | 4961 | NZ  | LYS | A | 141 | -51.469 | 46.912 | -78.785 | 1.00 | 0.00 | B | N |
| ATOM | 4962 | C   | LYS | A | 141 | -49.730 | 43.152 | -73.761 | 1.00 | 0.00 | B | C |
| ATOM | 4963 | O   | LYS | A | 141 | -49.117 | 43.890 | -72.994 | 1.00 | 0.00 | B | O |
| ATOM | 4964 | N   | LYS | A | 142 | -49.921 | 41.844 | -73.499 | 1.00 | 0.00 | B | N |
| ATOM | 4965 | CA  | LYS | A | 142 | -49.374 | 41.248 | -72.315 | 1.00 | 0.00 | B | C |
| ATOM | 4966 | CB  | LYS | A | 142 | -49.994 | 39.888 | -71.947 | 1.00 | 0.00 | B | C |
| ATOM | 4967 | CG  | LYS | A | 142 | -51.368 | 40.003 | -71.282 | 1.00 | 0.00 | B | C |
| ATOM | 4968 | CD  | LYS | A | 142 | -52.123 | 38.676 | -71.179 | 1.00 | 0.00 | B | C |
| ATOM | 4969 | CE  | LYS | A | 142 | -53.284 | 38.711 | -70.182 | 1.00 | 0.00 | B | C |
| ATOM | 4970 | NZ  | LYS | A | 142 | -54.239 | 39.785 | -70.538 | 1.00 | 0.00 | B | N |
| ATOM | 4971 | C   | LYS | A | 142 | -47.918 | 41.031 | -72.563 | 1.00 | 0.00 | B | C |
| ATOM | 4972 | O   | LYS | A | 142 | -47.480 | 40.965 | -73.710 | 1.00 | 0.00 | B | O |
| ATOM | 4973 | N   | HSD | A | 143 | -47.115 | 40.936 | -71.482 | 1.00 | 0.00 | B | N |
| ATOM | 4974 | CA  | HSD | A | 143 | -45.708 | 40.743 | -71.677 | 1.00 | 0.00 | B | C |
| ATOM | 4975 | CB  | HSD | A | 143 | -44.823 | 41.801 | -70.990 | 1.00 | 0.00 | B | C |
| ATOM | 4976 | ND1 | HSD | A | 143 | -44.302 | 43.546 | -72.766 | 1.00 | 0.00 | B | N |
| ATOM | 4977 | CG  | HSD | A | 143 | -44.931 | 43.168 | -71.598 | 1.00 | 0.00 | B | C |
| ATOM | 4978 | CE1 | HSD | A | 143 | -44.630 | 44.842 | -72.985 | 1.00 | 0.00 | B | C |
| ATOM | 4979 | NE2 | HSD | A | 143 | -45.421 | 45.326 | -72.043 | 1.00 | 0.00 | B | N |
| ATOM | 4980 | CD2 | HSD | A | 143 | -45.607 | 44.268 | -71.170 | 1.00 | 0.00 | B | C |
| ATOM | 4981 | C   | HSD | A | 143 | -45.315 | 39.412 | -71.126 | 1.00 | 0.00 | B | C |
| ATOM | 4982 | O   | HSD | A | 143 | -45.880 | 38.915 | -70.153 | 1.00 | 0.00 | B | O |
| ATOM | 4983 | N   | LEU | A | 144 | -44.278 | 38.819 | -71.742 | 1.00 | 0.00 | B | N |
| ATOM | 4984 | CA  | LEU | A | 144 | -43.753 | 37.530 | -71.402 | 1.00 | 0.00 | B | C |
| ATOM | 4985 | CB  | LEU | A | 144 | -42.592 | 37.134 | -72.333 | 1.00 | 0.00 | B | C |
| ATOM | 4986 | CG  | LEU | A | 144 | -42.102 | 35.688 | -72.160 | 1.00 | 0.00 | B | C |
| ATOM | 4987 | CD1 | LEU | A | 144 | -43.219 | 34.693 | -72.510 | 1.00 | 0.00 | B | C |
| ATOM | 4988 | CD2 | LEU | A | 144 | -40.821 | 35.431 | -72.970 | 1.00 | 0.00 | B | C |
| ATOM | 4989 | C   | LEU | A | 144 | -43.238 | 37.618 | -69.990 | 1.00 | 0.00 | B | C |
| ATOM | 4990 | O   | LEU | A | 144 | -43.055 | 36.609 | -69.312 | 1.00 | 0.00 | B | O |
| ATOM | 4991 | N   | THR | A | 145 | -42.882 | 38.848 | -69.584 | 1.00 | 0.00 | B | N |
| ATOM | 4992 | CA  | THR | A | 145 | -42.361 | 39.258 | -68.303 | 1.00 | 0.00 | B | C |
| ATOM | 4993 | CB  | THR | A | 145 | -41.625 | 40.559 | -68.390 | 1.00 | 0.00 | B | C |
| ATOM | 4994 | OG1 | THR | A | 145 | -42.498 | 41.587 | -68.831 | 1.00 | 0.00 | B | O |
| ATOM | 4995 | CG2 | THR | A | 145 | -40.458 | 40.388 | -69.377 | 1.00 | 0.00 | B | C |
| ATOM | 4996 | C   | THR | A | 145 | -43.403 | 39.411 | -67.229 | 1.00 | 0.00 | B | C |



|      |      |     |           |         |        |         |      |      |   |   |
|------|------|-----|-----------|---------|--------|---------|------|------|---|---|
| ATOM | 4997 | O   | THR A 145 | -43.049 | 39.450 | -66.053 | 1.00 | 0.00 | B | O |
| ATOM | 4998 | N   | ASP A 146 | -44.697 | 39.557 | -67.580 | 1.00 | 0.00 | B | N |
| ATOM | 4999 | CA  | ASP A 146 | -45.705 | 39.872 | -66.595 | 1.00 | 0.00 | B | C |
| ATOM | 5000 | CB  | ASP A 146 | -47.136 | 39.867 | -67.155 | 1.00 | 0.00 | B | C |
| ATOM | 5001 | CG  | ASP A 146 | -47.297 | 41.073 | -68.069 | 1.00 | 0.00 | B | C |
| ATOM | 5002 | OD1 | ASP A 146 | -46.379 | 41.938 | -68.081 | 1.00 | 0.00 | B | O |
| ATOM | 5003 | OD2 | ASP A 146 | -48.345 | 41.148 | -68.764 | 1.00 | 0.00 | B | O |
| ATOM | 5004 | C   | ASP A 146 | -45.666 | 38.902 | -65.454 | 1.00 | 0.00 | B | C |
| ATOM | 5005 | O   | ASP A 146 | -45.165 | 37.784 | -65.566 | 1.00 | 0.00 | B | O |
| ATOM | 5006 | N   | ASN A 147 | -46.218 | 39.339 | -64.304 | 1.00 | 0.00 | B | N |
| ATOM | 5007 | CA  | ASN A 147 | -46.211 | 38.595 | -63.072 | 1.00 | 0.00 | B | C |
| ATOM | 5008 | CB  | ASN A 147 | -46.917 | 39.326 | -61.918 | 1.00 | 0.00 | B | C |
| ATOM | 5009 | CG  | ASN A 147 | -46.096 | 40.555 | -61.551 | 1.00 | 0.00 | B | C |
| ATOM | 5010 | OD1 | ASN A 147 | -46.624 | 41.665 | -61.487 | 1.00 | 0.00 | B | O |
| ATOM | 5011 | ND2 | ASN A 147 | -44.774 | 40.360 | -61.300 | 1.00 | 0.00 | B | N |
| ATOM | 5012 | C   | ASN A 147 | -46.917 | 37.289 | -63.286 | 1.00 | 0.00 | B | C |
| ATOM | 5013 | O   | ASN A 147 | -46.551 | 36.274 | -62.694 | 1.00 | 0.00 | B | O |
| ATOM | 5014 | N   | GLU A 148 | -47.940 | 37.294 | -64.159 | 1.00 | 0.00 | B | N |
| ATOM | 5015 | CA  | GLU A 148 | -48.781 | 36.163 | -64.460 | 1.00 | 0.00 | B | C |
| ATOM | 5016 | CB  | GLU A 148 | -49.736 | 36.452 | -65.633 | 1.00 | 0.00 | B | C |
| ATOM | 5017 | CG  | GLU A 148 | -50.651 | 37.661 | -65.479 | 1.00 | 0.00 | B | C |
| ATOM | 5018 | CD  | GLU A 148 | -51.148 | 38.004 | -66.880 | 1.00 | 0.00 | B | C |
| ATOM | 5019 | OE1 | GLU A 148 | -50.307 | 38.010 | -67.820 | 1.00 | 0.00 | B | O |
| ATOM | 5020 | OE2 | GLU A 148 | -52.371 | 38.263 | -67.033 | 1.00 | 0.00 | B | O |
| ATOM | 5021 | C   | GLU A 148 | -47.946 | 35.049 | -65.019 | 1.00 | 0.00 | B | C |
| ATOM | 5022 | O   | GLU A 148 | -48.234 | 33.869 | -64.824 | 1.00 | 0.00 | B | O |
| ATOM | 5023 | N   | PHE A 149 | -46.931 | 35.429 | -65.806 | 1.00 | 0.00 | B | N |
| ATOM | 5024 | CA  | PHE A 149 | -46.037 | 34.581 | -66.539 | 1.00 | 0.00 | B | C |
| ATOM | 5025 | CB  | PHE A 149 | -45.359 | 35.293 | -67.723 | 1.00 | 0.00 | B | C |
| ATOM | 5026 | CG  | PHE A 149 | -46.438 | 35.509 | -68.731 | 1.00 | 0.00 | B | C |
| ATOM | 5027 | CD1 | PHE A 149 | -46.878 | 34.460 | -69.509 | 1.00 | 0.00 | B | C |
| ATOM | 5028 | CE1 | PHE A 149 | -47.872 | 34.641 | -70.444 | 1.00 | 0.00 | B | C |
| ATOM | 5029 | CZ  | PHE A 149 | -48.443 | 35.881 | -70.612 | 1.00 | 0.00 | B | C |
| ATOM | 5030 | CD2 | PHE A 149 | -47.015 | 36.744 | -68.908 | 1.00 | 0.00 | B | C |
| ATOM | 5031 | CE2 | PHE A 149 | -48.010 | 36.934 | -69.842 | 1.00 | 0.00 | B | C |
| ATOM | 5032 | C   | PHE A 149 | -45.003 | 33.913 | -65.678 | 1.00 | 0.00 | B | C |
| ATOM | 5033 | O   | PHE A 149 | -44.263 | 33.061 | -66.167 | 1.00 | 0.00 | B | O |
| ATOM | 5034 | N   | LYS A 150 | -44.818 | 34.361 | -64.423 | 1.00 | 0.00 | B | N |

|      |      |     |     |   |     |         |        |         |      |      |   |   |
|------|------|-----|-----|---|-----|---------|--------|---------|------|------|---|---|
| ATOM | 5035 | CA  | LYS | A | 150 | -43.796 | 33.776 | -63.594 | 1.00 | 0.00 | B | C |
| ATOM | 5036 | CB  | LYS | A | 150 | -42.987 | 34.831 | -62.830 | 1.00 | 0.00 | B | C |
| ATOM | 5037 | CG  | LYS | A | 150 | -42.453 | 35.981 | -63.681 | 1.00 | 0.00 | B | C |
| ATOM | 5038 | CD  | LYS | A | 150 | -42.025 | 37.168 | -62.813 | 1.00 | 0.00 | B | C |
| ATOM | 5039 | CE  | LYS | A | 150 | -41.742 | 38.453 | -63.589 | 1.00 | 0.00 | B | C |
| ATOM | 5040 | NZ  | LYS | A | 150 | -41.551 | 39.575 | -62.642 | 1.00 | 0.00 | B | N |
| ATOM | 5041 | C   | LYS | A | 150 | -44.425 | 32.951 | -62.506 | 1.00 | 0.00 | B | C |
| ATOM | 5042 | O   | LYS | A | 150 | -45.577 | 33.162 | -62.129 | 1.00 | 0.00 | B | O |
| ATOM | 5043 | N   | ASP | A | 151 | -43.666 | 31.961 | -61.978 | 1.00 | 0.00 | B | N |
| ATOM | 5044 | CA  | ASP | A | 151 | -44.111 | 31.180 | -60.857 | 1.00 | 0.00 | B | C |
| ATOM | 5045 | CB  | ASP | A | 151 | -43.184 | 29.983 | -60.565 | 1.00 | 0.00 | B | C |
| ATOM | 5046 | CG  | ASP | A | 151 | -43.739 | 29.129 | -59.433 | 1.00 | 0.00 | B | C |
| ATOM | 5047 | OD1 | ASP | A | 151 | -44.814 | 29.480 | -58.875 | 1.00 | 0.00 | B | O |
| ATOM | 5048 | OD2 | ASP | A | 151 | -43.083 | 28.103 | -59.109 | 1.00 | 0.00 | B | O |
| ATOM | 5049 | C   | ASP | A | 151 | -44.077 | 32.106 | -59.684 | 1.00 | 0.00 | B | C |
| ATOM | 5050 | O   | ASP | A | 151 | -43.067 | 32.753 | -59.404 | 1.00 | 0.00 | B | O |
| ATOM | 5051 | N   | PRO | A | 152 | -45.158 | 32.154 | -58.969 | 1.00 | 0.00 | B | N |
| ATOM | 5052 | CD  | PRO | A | 152 | -46.443 | 31.707 | -59.478 | 1.00 | 0.00 | B | C |
| ATOM | 5053 | CA  | PRO | A | 152 | -45.296 | 33.091 | -57.893 | 1.00 | 0.00 | B | C |
| ATOM | 5054 | CB  | PRO | A | 152 | -46.764 | 33.006 | -57.461 | 1.00 | 0.00 | B | C |
| ATOM | 5055 | CG  | PRO | A | 152 | -47.349 | 31.812 | -58.247 | 1.00 | 0.00 | B | C |
| ATOM | 5056 | C   | PRO | A | 152 | -44.306 | 32.962 | -56.773 | 1.00 | 0.00 | B | C |
| ATOM | 5057 | O   | PRO | A | 152 | -44.049 | 33.978 | -56.123 | 1.00 | 0.00 | B | O |
| ATOM | 5058 | N   | GLU | A | 153 | -43.838 | 31.741 | -56.434 | 1.00 | 0.00 | B | N |
| ATOM | 5059 | CA  | GLU | A | 153 | -42.863 | 31.615 | -55.381 | 1.00 | 0.00 | B | C |
| ATOM | 5060 | CB  | GLU | A | 153 | -42.891 | 30.239 | -54.683 | 1.00 | 0.00 | B | C |
| ATOM | 5061 | CG  | GLU | A | 153 | -42.761 | 29.039 | -55.623 | 1.00 | 0.00 | B | C |
| ATOM | 5062 | CD  | GLU | A | 153 | -44.147 | 28.429 | -55.792 | 1.00 | 0.00 | B | C |
| ATOM | 5063 | OE1 | GLU | A | 153 | -45.066 | 28.834 | -55.029 | 1.00 | 0.00 | B | O |
| ATOM | 5064 | OE2 | GLU | A | 153 | -44.304 | 27.548 | -56.677 | 1.00 | 0.00 | B | O |
| ATOM | 5065 | C   | GLU | A | 153 | -41.440 | 31.866 | -55.818 | 1.00 | 0.00 | B | C |
| ATOM | 5066 | O   | GLU | A | 153 | -40.710 | 32.621 | -55.175 | 1.00 | 0.00 | B | O |
| ATOM | 5067 | N   | THR | A | 154 | -41.009 | 31.158 | -56.890 | 1.00 | 0.00 | B | N |
| ATOM | 5068 | CA  | THR | A | 154 | -39.667 | 31.156 | -57.424 | 1.00 | 0.00 | B | C |
| ATOM | 5069 | CB  | THR | A | 154 | -39.374 | 29.920 | -58.222 | 1.00 | 0.00 | B | C |
| ATOM | 5070 | OG1 | THR | A | 154 | -40.242 | 29.839 | -59.342 | 1.00 | 0.00 | B | O |
| ATOM | 5071 | CG2 | THR | A | 154 | -39.570 | 28.696 | -57.316 | 1.00 | 0.00 | B | C |
| ATOM | 5072 | C   | THR | A | 154 | -39.327 | 32.332 | -58.297 | 1.00 | 0.00 | B | C |

ATOM 5073 O THR A 154 -38.219 32.868 -58.221 1.00 0.00 B O  
ATOM 5074 N GLY A 155 -40.261 32.764 -59.166 1.00 0.00 B N  
ATOM 5075 CA GLY A 155 -39.965 33.830 -60.087 1.00 0.00 B C  
ATOM 5076 C GLY A 155 -39.459 33.243 -61.376 1.00 0.00 B C  
ATOM 5077 O GLY A 155 -38.891 33.951 -62.208 1.00 0.00 B O  
ATOM 5078 N LYS A 156 -39.660 31.925 -61.574 1.00 0.00 B N  
ATOM 5079 CA LYS A 156 -39.237 31.221 -62.755 1.00 0.00 B C  
ATOM 5080 CB LYS A 156 -39.420 29.699 -62.608 1.00 0.00 B C  
ATOM 5081 CG LYS A 156 -38.918 28.864 -63.787 1.00 0.00 B C  
ATOM 5082 CD LYS A 156 -38.915 27.363 -63.491 1.00 0.00 B C  
ATOM 5083 CE LYS A 156 -40.198 26.884 -62.802 1.00 0.00 B C  
ATOM 5084 NZ LYS A 156 -40.135 25.429 -62.543 1.00 0.00 B N  
ATOM 5085 C LYS A 156 -40.058 31.680 -63.928 1.00 0.00 B C  
ATOM 5086 O LYS A 156 -41.246 31.979 -63.799 1.00 0.00 B O  
ATOM 5087 N THR A 157 -39.417 31.746 -65.115 1.00 0.00 B N  
ATOM 5088 CA THR A 157 -40.072 32.166 -66.323 1.00 0.00 B C  
ATOM 5089 CB THR A 157 -39.422 33.356 -66.964 1.00 0.00 B C  
ATOM 5090 OG1 THR A 157 -38.090 33.042 -67.341 1.00 0.00 B O  
ATOM 5091 CG2 THR A 157 -39.428 34.513 -65.951 1.00 0.00 B C  
ATOM 5092 C THR A 157 -39.983 31.021 -67.279 1.00 0.00 B C  
ATOM 5093 O THR A 157 -39.333 30.016 -66.997 1.00 0.00 B O  
ATOM 5094 N CYS A 158 -40.652 31.141 -68.441 1.00 0.00 B N  
ATOM 5095 CA CYS A 158 -40.678 30.076 -69.402 1.00 0.00 B C  
ATOM 5096 CB CYS A 158 -41.558 30.409 -70.618 1.00 0.00 B C  
ATOM 5097 SG CYS A 158 -41.035 31.934 -71.455 1.00 0.00 B S  
ATOM 5098 C CYS A 158 -39.285 29.803 -69.871 1.00 0.00 B C  
ATOM 5099 O CYS A 158 -38.899 28.647 -70.045 1.00 0.00 B O  
ATOM 5100 N LEU A 159 -38.474 30.855 -70.073 1.00 0.00 B N  
ATOM 5101 CA LEU A 159 -37.137 30.630 -70.539 1.00 0.00 B C  
ATOM 5102 CB LEU A 159 -36.320 31.913 -70.737 1.00 0.00 B C  
ATOM 5103 CG LEU A 159 -34.904 31.609 -71.257 1.00 0.00 B C  
ATOM 5104 CD1 LEU A 159 -34.939 31.136 -72.718 1.00 0.00 B C  
ATOM 5105 CD2 LEU A 159 -33.941 32.774 -71.028 1.00 0.00 B C  
ATOM 5106 C LEU A 159 -36.416 29.808 -69.510 1.00 0.00 B C  
ATOM 5107 O LEU A 159 -35.625 28.931 -69.852 1.00 0.00 B O  
ATOM 5108 N LEU A 160 -36.652 30.096 -68.217 1.00 0.00 B N  
ATOM 5109 CA LEU A 160 -36.011 29.356 -67.165 1.00 0.00 B C  
ATOM 5110 CB LEU A 160 -36.269 29.971 -65.777 1.00 0.00 B C

|      |      |     |     |   |     |         |        |         |      |      |   |   |
|------|------|-----|-----|---|-----|---------|--------|---------|------|------|---|---|
| ATOM | 5111 | CG  | LEU | A | 160 | -35.558 | 31.326 | -65.577 | 1.00 | 0.00 | B | C |
| ATOM | 5112 | CD1 | LEU | A | 160 | -35.830 | 31.913 | -64.182 | 1.00 | 0.00 | B | C |
| ATOM | 5113 | CD2 | LEU | A | 160 | -34.050 | 31.205 | -65.858 | 1.00 | 0.00 | B | C |
| ATOM | 5114 | C   | LEU | A | 160 | -36.492 | 27.933 | -67.176 | 1.00 | 0.00 | B | C |
| ATOM | 5115 | O   | LEU | A | 160 | -35.695 | 27.012 | -67.016 | 1.00 | 0.00 | B | O |
| ATOM | 5116 | N   | LYS | A | 161 | -37.809 | 27.700 | -67.375 | 1.00 | 0.00 | B | N |
| ATOM | 5117 | CA  | LYS | A | 161 | -38.266 | 26.335 | -67.385 | 1.00 | 0.00 | B | C |
| ATOM | 5118 | CB  | LYS | A | 161 | -39.781 | 26.127 | -67.551 | 1.00 | 0.00 | B | C |
| ATOM | 5119 | CG  | LYS | A | 161 | -40.105 | 24.627 | -67.535 | 1.00 | 0.00 | B | C |
| ATOM | 5120 | CD  | LYS | A | 161 | -41.564 | 24.257 | -67.278 | 1.00 | 0.00 | B | C |
| ATOM | 5121 | CE  | LYS | A | 161 | -41.810 | 22.745 | -67.293 | 1.00 | 0.00 | B | C |
| ATOM | 5122 | NZ  | LYS | A | 161 | -43.200 | 22.449 | -66.885 | 1.00 | 0.00 | B | N |
| ATOM | 5123 | C   | LYS | A | 161 | -37.595 | 25.636 | -68.520 | 1.00 | 0.00 | B | C |
| ATOM | 5124 | O   | LYS | A | 161 | -37.221 | 24.470 | -68.411 | 1.00 | 0.00 | B | O |
| ATOM | 5125 | N   | ALA | A | 162 | -37.421 | 26.351 | -69.641 | 1.00 | 0.00 | B | N |
| ATOM | 5126 | CA  | ALA | A | 162 | -36.789 | 25.797 | -70.801 | 1.00 | 0.00 | B | C |
| ATOM | 5127 | CB  | ALA | A | 162 | -36.694 | 26.813 | -71.956 | 1.00 | 0.00 | B | C |
| ATOM | 5128 | C   | ALA | A | 162 | -35.397 | 25.406 | -70.418 | 1.00 | 0.00 | B | C |
| ATOM | 5129 | O   | ALA | A | 162 | -34.881 | 24.382 | -70.868 | 1.00 | 0.00 | B | O |
| ATOM | 5130 | N   | MET | A | 163 | -34.746 | 26.221 | -69.566 | 1.00 | 0.00 | B | N |
| ATOM | 5131 | CA  | MET | A | 163 | -33.395 | 25.959 | -69.165 | 1.00 | 0.00 | B | C |
| ATOM | 5132 | CB  | MET | A | 163 | -32.799 | 27.092 | -68.312 | 1.00 | 0.00 | B | C |
| ATOM | 5133 | CG  | MET | A | 163 | -32.594 | 28.373 | -69.126 | 1.00 | 0.00 | B | C |
| ATOM | 5134 | SD  | MET | A | 163 | -31.369 | 28.198 | -70.459 | 1.00 | 0.00 | B | S |
| ATOM | 5135 | CE  | MET | A | 163 | -31.799 | 29.750 | -71.297 | 1.00 | 0.00 | B | C |
| ATOM | 5136 | C   | MET | A | 163 | -33.331 | 24.672 | -68.401 | 1.00 | 0.00 | B | C |
| ATOM | 5137 | O   | MET | A | 163 | -32.355 | 23.932 | -68.515 | 1.00 | 0.00 | B | O |
| ATOM | 5138 | N   | LEU | A | 164 | -34.332 | 24.399 | -67.543 | 1.00 | 0.00 | B | N |
| ATOM | 5139 | CA  | LEU | A | 164 | -34.362 | 23.158 | -66.818 | 1.00 | 0.00 | B | C |
| ATOM | 5140 | CB  | LEU | A | 164 | -35.339 | 23.157 | -65.633 | 1.00 | 0.00 | B | C |
| ATOM | 5141 | CG  | LEU | A | 164 | -34.880 | 24.059 | -64.469 | 1.00 | 0.00 | B | C |
| ATOM | 5142 | CD1 | LEU | A | 164 | -33.526 | 23.592 | -63.909 | 1.00 | 0.00 | B | C |
| ATOM | 5143 | CD2 | LEU | A | 164 | -34.878 | 25.543 | -64.850 | 1.00 | 0.00 | B | C |
| ATOM | 5144 | C   | LEU | A | 164 | -34.717 | 22.021 | -67.726 | 1.00 | 0.00 | B | C |
| ATOM | 5145 | O   | LEU | A | 164 | -34.169 | 20.925 | -67.606 | 1.00 | 0.00 | B | O |
| ATOM | 5146 | N   | ASN | A | 165 | -35.656 | 22.241 | -68.667 | 1.00 | 0.00 | B | N |
| ATOM | 5147 | CA  | ASN | A | 165 | -36.079 | 21.143 | -69.487 | 1.00 | 0.00 | B | C |
| ATOM | 5148 | CB  | ASN | A | 165 | -37.537 | 21.272 | -69.966 | 1.00 | 0.00 | B | C |

|      |      |     |     |   |     |         |        |         |      |      |   |   |
|------|------|-----|-----|---|-----|---------|--------|---------|------|------|---|---|
| ATOM | 5149 | CG  | ASN | A | 165 | -38.492 | 21.129 | -68.782 | 1.00 | 0.00 | B | C |
| ATOM | 5150 | OD1 | ASN | A | 165 | -39.660 | 20.791 | -68.971 | 1.00 | 0.00 | B | O |
| ATOM | 5151 | ND2 | ASN | A | 165 | -38.005 | 21.390 | -67.540 | 1.00 | 0.00 | B | N |
| ATOM | 5152 | C   | ASN | A | 165 | -35.225 | 21.098 | -70.711 | 1.00 | 0.00 | B | C |
| ATOM | 5153 | O   | ASN | A | 165 | -35.669 | 21.446 | -71.805 | 1.00 | 0.00 | B | O |
| ATOM | 5154 | N   | LEU | A | 166 | -33.975 | 20.622 | -70.568 | 1.00 | 0.00 | B | N |
| ATOM | 5155 | CA  | LEU | A | 166 | -33.130 | 20.530 | -71.720 | 1.00 | 0.00 | B | C |
| ATOM | 5156 | CB  | LEU | A | 166 | -31.679 | 20.987 | -71.486 | 1.00 | 0.00 | B | C |
| ATOM | 5157 | CG  | LEU | A | 166 | -31.530 | 22.500 | -71.258 | 1.00 | 0.00 | B | C |
| ATOM | 5158 | CD1 | LEU | A | 166 | -30.060 | 22.884 | -71.033 | 1.00 | 0.00 | B | C |
| ATOM | 5159 | CD2 | LEU | A | 166 | -32.175 | 23.300 | -72.402 | 1.00 | 0.00 | B | C |
| ATOM | 5160 | C   | LEU | A | 166 | -33.071 | 19.103 | -72.144 | 1.00 | 0.00 | B | C |
| ATOM | 5161 | O   | LEU | A | 166 | -33.183 | 18.195 | -71.325 | 1.00 | 0.00 | B | O |
| ATOM | 5162 | N   | HSD | A | 167 | -32.952 | 18.888 | -73.467 | 1.00 | 0.00 | B | N |
| ATOM | 5163 | CA  | HSD | A | 167 | -32.760 | 17.569 | -73.990 | 1.00 | 0.00 | B | C |
| ATOM | 5164 | CB  | HSD | A | 167 | -33.931 | 17.047 | -74.848 | 1.00 | 0.00 | B | C |
| ATOM | 5165 | ND1 | HSD | A | 167 | -34.604 | 19.032 | -76.289 | 1.00 | 0.00 | B | N |
| ATOM | 5166 | CG  | HSD | A | 167 | -34.111 | 17.753 | -76.159 | 1.00 | 0.00 | B | C |
| ATOM | 5167 | CE1 | HSD | A | 167 | -34.610 | 19.316 | -77.616 | 1.00 | 0.00 | B | C |
| ATOM | 5168 | NE2 | HSD | A | 167 | -34.155 | 18.313 | -78.345 | 1.00 | 0.00 | B | N |
| ATOM | 5169 | CD2 | HSD | A | 167 | -33.841 | 17.329 | -77.426 | 1.00 | 0.00 | B | C |
| ATOM | 5170 | C   | HSD | A | 167 | -31.535 | 17.672 | -74.845 | 1.00 | 0.00 | B | C |
| ATOM | 5171 | O   | HSD | A | 167 | -31.466 | 18.492 | -75.761 | 1.00 | 0.00 | B | O |
| ATOM | 5172 | N   | ASP | A | 168 | -30.511 | 16.854 | -74.541 | 1.00 | 0.00 | B | N |
| ATOM | 5173 | CA  | ASP | A | 168 | -29.286 | 16.891 | -75.287 | 1.00 | 0.00 | B | C |
| ATOM | 5174 | CB  | ASP | A | 168 | -29.427 | 16.386 | -76.737 | 1.00 | 0.00 | B | C |
| ATOM | 5175 | CG  | ASP | A | 168 | -29.369 | 14.865 | -76.712 | 1.00 | 0.00 | B | C |
| ATOM | 5176 | OD1 | ASP | A | 168 | -28.238 | 14.330 | -76.541 | 1.00 | 0.00 | B | O |
| ATOM | 5177 | OD2 | ASP | A | 168 | -30.438 | 14.215 | -76.847 | 1.00 | 0.00 | B | O |
| ATOM | 5178 | C   | ASP | A | 168 | -28.732 | 18.280 | -75.297 | 1.00 | 0.00 | B | C |
| ATOM | 5179 | O   | ASP | A | 168 | -28.132 | 18.706 | -76.283 | 1.00 | 0.00 | B | O |
| ATOM | 5180 | N   | GLY | A | 169 | -28.910 | 19.027 | -74.190 | 1.00 | 0.00 | B | N |
| ATOM | 5181 | CA  | GLY | A | 169 | -28.342 | 20.340 | -74.070 | 1.00 | 0.00 | B | C |
| ATOM | 5182 | C   | GLY | A | 169 | -28.941 | 21.244 | -75.102 | 1.00 | 0.00 | B | C |
| ATOM | 5183 | O   | GLY | A | 169 | -28.302 | 22.211 | -75.517 | 1.00 | 0.00 | B | O |
| ATOM | 5184 | N   | GLN | A | 170 | -30.187 | 20.967 | -75.541 | 1.00 | 0.00 | B | N |
| ATOM | 5185 | CA  | GLN | A | 170 | -30.769 | 21.775 | -76.580 | 1.00 | 0.00 | B | C |
| ATOM | 5186 | CB  | GLN | A | 170 | -30.752 | 21.092 | -77.956 | 1.00 | 0.00 | B | C |

|      |      |     |     |   |     |         |        |         |      |      |   |   |
|------|------|-----|-----|---|-----|---------|--------|---------|------|------|---|---|
| ATOM | 5187 | CG  | GLN | A | 170 | -29.345 | 20.842 | -78.498 | 1.00 | 0.00 | B | C |
| ATOM | 5188 | CD  | GLN | A | 170 | -29.475 | 20.059 | -79.798 | 1.00 | 0.00 | B | C |
| ATOM | 5189 | OE1 | GLN | A | 170 | -28.952 | 18.954 | -79.925 | 1.00 | 0.00 | B | O |
| ATOM | 5190 | NE2 | GLN | A | 170 | -30.194 | 20.644 | -80.791 | 1.00 | 0.00 | B | N |
| ATOM | 5191 | C   | GLN | A | 170 | -32.207 | 22.078 | -76.288 | 1.00 | 0.00 | B | C |
| ATOM | 5192 | O   | GLN | A | 170 | -32.921 | 21.285 | -75.672 | 1.00 | 0.00 | B | O |
| ATOM | 5193 | N   | ASN | A | 171 | -32.651 | 23.277 | -76.721 | 1.00 | 0.00 | B | N |
| ATOM | 5194 | CA  | ASN | A | 171 | -34.023 | 23.686 | -76.608 | 1.00 | 0.00 | B | C |
| ATOM | 5195 | CB  | ASN | A | 171 | -34.371 | 24.141 | -75.177 | 1.00 | 0.00 | B | C |
| ATOM | 5196 | CG  | ASN | A | 171 | -35.880 | 24.206 | -75.018 | 1.00 | 0.00 | B | C |
| ATOM | 5197 | OD1 | ASN | A | 171 | -36.619 | 24.298 | -75.996 | 1.00 | 0.00 | B | O |
| ATOM | 5198 | ND2 | ASN | A | 171 | -36.351 | 24.159 | -73.743 | 1.00 | 0.00 | B | N |
| ATOM | 5199 | C   | ASN | A | 171 | -34.184 | 24.868 | -77.525 | 1.00 | 0.00 | B | C |
| ATOM | 5200 | O   | ASN | A | 171 | -33.535 | 25.897 | -77.343 | 1.00 | 0.00 | B | O |
| ATOM | 5201 | N   | THR | A | 172 | -35.016 | 24.711 | -78.573 | 1.00 | 0.00 | B | N |
| ATOM | 5202 | CA  | THR | A | 172 | -35.359 | 25.689 | -79.573 | 1.00 | 0.00 | B | C |
| ATOM | 5203 | CB  | THR | A | 172 | -35.887 | 25.049 | -80.818 | 1.00 | 0.00 | B | C |
| ATOM | 5204 | OG1 | THR | A | 172 | -37.059 | 24.303 | -80.527 | 1.00 | 0.00 | B | O |
| ATOM | 5205 | CG2 | THR | A | 172 | -34.797 | 24.119 | -81.380 | 1.00 | 0.00 | B | C |
| ATOM | 5206 | C   | THR | A | 172 | -36.389 | 26.642 | -79.056 | 1.00 | 0.00 | B | C |
| ATOM | 5207 | O   | THR | A | 172 | -36.558 | 27.742 | -79.581 | 1.00 | 0.00 | B | O |
| ATOM | 5208 | N   | THR | A | 173 | -37.156 | 26.204 | -78.043 | 1.00 | 0.00 | B | N |
| ATOM | 5209 | CA  | THR | A | 173 | -38.178 | 27.008 | -77.454 | 1.00 | 0.00 | B | C |
| ATOM | 5210 | CB  | THR | A | 173 | -38.830 | 26.327 | -76.282 | 1.00 | 0.00 | B | C |
| ATOM | 5211 | OG1 | THR | A | 173 | -39.453 | 25.118 | -76.694 | 1.00 | 0.00 | B | O |
| ATOM | 5212 | CG2 | THR | A | 173 | -39.868 | 27.273 | -75.662 | 1.00 | 0.00 | B | C |
| ATOM | 5213 | C   | THR | A | 173 | -37.497 | 28.240 | -76.959 | 1.00 | 0.00 | B | C |
| ATOM | 5214 | O   | THR | A | 173 | -38.079 | 29.325 | -76.974 | 1.00 | 0.00 | B | O |
| ATOM | 5215 | N   | ILE | A | 174 | -36.244 | 28.104 | -76.485 | 1.00 | 0.00 | B | N |
| ATOM | 5216 | CA  | ILE | A | 174 | -35.530 | 29.247 | -76.000 | 1.00 | 0.00 | B | C |
| ATOM | 5217 | CB  | ILE | A | 174 | -34.183 | 28.919 | -75.413 | 1.00 | 0.00 | B | C |
| ATOM | 5218 | CG2 | ILE | A | 174 | -33.461 | 30.242 | -75.109 | 1.00 | 0.00 | B | C |
| ATOM | 5219 | CG1 | ILE | A | 174 | -34.322 | 28.005 | -74.184 | 1.00 | 0.00 | B | C |
| ATOM | 5220 | CD  | ILE | A | 174 | -32.991 | 27.418 | -73.716 | 1.00 | 0.00 | B | C |
| ATOM | 5221 | C   | ILE | A | 174 | -35.323 | 30.219 | -77.127 | 1.00 | 0.00 | B | C |
| ATOM | 5222 | O   | ILE | A | 174 | -35.623 | 31.401 | -76.967 | 1.00 | 0.00 | B | O |
| ATOM | 5223 | N   | PRO | A | 175 | -34.860 | 29.792 | -78.279 | 1.00 | 0.00 | B | N |
| ATOM | 5224 | CD  | PRO | A | 175 | -34.064 | 28.583 | -78.414 | 1.00 | 0.00 | B | C |

|      |      |     |           |         |        |         |      |      |   |   |
|------|------|-----|-----------|---------|--------|---------|------|------|---|---|
| ATOM | 5225 | CA  | PRO A 175 | -34.631 | 30.714 | -79.355 | 1.00 | 0.00 | B | C |
| ATOM | 5226 | CB  | PRO A 175 | -33.967 | 29.902 | -80.463 | 1.00 | 0.00 | B | C |
| ATOM | 5227 | CG  | PRO A 175 | -33.234 | 28.784 | -79.695 | 1.00 | 0.00 | B | C |
| ATOM | 5228 | C   | PRO A 175 | -35.891 | 31.404 | -79.761 | 1.00 | 0.00 | B | C |
| ATOM | 5229 | O   | PRO A 175 | -35.839 | 32.583 | -80.106 | 1.00 | 0.00 | B | O |
| ATOM | 5230 | N   | LEU A 176 | -37.020 | 30.679 | -79.760 | 1.00 | 0.00 | B | N |
| ATOM | 5231 | CA  | LEU A 176 | -38.278 | 31.260 | -80.120 | 1.00 | 0.00 | B | C |
| ATOM | 5232 | CB  | LEU A 176 | -39.354 | 30.180 | -80.359 | 1.00 | 0.00 | B | C |
| ATOM | 5233 | CG  | LEU A 176 | -40.697 | 30.676 | -80.944 | 1.00 | 0.00 | B | C |
| ATOM | 5234 | CD1 | LEU A 176 | -41.599 | 29.484 | -81.297 | 1.00 | 0.00 | B | C |
| ATOM | 5235 | CD2 | LEU A 176 | -41.423 | 31.675 | -80.028 | 1.00 | 0.00 | B | C |
| ATOM | 5236 | C   | LEU A 176 | -38.711 | 32.189 | -79.026 | 1.00 | 0.00 | B | C |
| ATOM | 5237 | O   | LEU A 176 | -39.235 | 33.271 | -79.287 | 1.00 | 0.00 | B | O |
| ATOM | 5238 | N   | LEU A 177 | -38.497 | 31.787 | -77.759 | 1.00 | 0.00 | B | N |
| ATOM | 5239 | CA  | LEU A 177 | -38.959 | 32.561 | -76.642 | 1.00 | 0.00 | B | C |
| ATOM | 5240 | CB  | LEU A 177 | -38.718 | 31.864 | -75.296 | 1.00 | 0.00 | B | C |
| ATOM | 5241 | CG  | LEU A 177 | -39.612 | 30.625 | -75.114 | 1.00 | 0.00 | B | C |
| ATOM | 5242 | CD1 | LEU A 177 | -39.363 | 29.948 | -73.769 | 1.00 | 0.00 | B | C |
| ATOM | 5243 | CD2 | LEU A 177 | -41.095 | 30.964 | -75.325 | 1.00 | 0.00 | B | C |
| ATOM | 5244 | C   | LEU A 177 | -38.279 | 33.891 | -76.624 | 1.00 | 0.00 | B | C |
| ATOM | 5245 | O   | LEU A 177 | -38.920 | 34.920 | -76.414 | 1.00 | 0.00 | B | O |
| ATOM | 5246 | N   | LEU A 178 | -36.957 | 33.903 | -76.855 | 1.00 | 0.00 | B | N |
| ATOM | 5247 | CA  | LEU A 178 | -36.178 | 35.107 | -76.860 | 1.00 | 0.00 | B | C |
| ATOM | 5248 | CB  | LEU A 178 | -34.710 | 34.782 | -77.147 | 1.00 | 0.00 | B | C |
| ATOM | 5249 | CG  | LEU A 178 | -34.083 | 33.880 | -76.072 | 1.00 | 0.00 | B | C |
| ATOM | 5250 | CD1 | LEU A 178 | -32.702 | 33.375 | -76.509 | 1.00 | 0.00 | B | C |
| ATOM | 5251 | CD2 | LEU A 178 | -34.038 | 34.588 | -74.708 | 1.00 | 0.00 | B | C |
| ATOM | 5252 | C   | LEU A 178 | -36.662 | 35.987 | -77.974 | 1.00 | 0.00 | B | C |
| ATOM | 5253 | O   | LEU A 178 | -36.876 | 37.186 | -77.797 | 1.00 | 0.00 | B | O |
| ATOM | 5254 | N   | GLU A 179 | -36.899 | 35.385 | -79.152 | 1.00 | 0.00 | B | N |
| ATOM | 5255 | CA  | GLU A 179 | -37.275 | 36.118 | -80.327 | 1.00 | 0.00 | B | C |
| ATOM | 5256 | CB  | GLU A 179 | -37.615 | 35.176 | -81.493 | 1.00 | 0.00 | B | C |
| ATOM | 5257 | CG  | GLU A 179 | -38.067 | 35.888 | -82.768 | 1.00 | 0.00 | B | C |
| ATOM | 5258 | CD  | GLU A 179 | -38.558 | 34.824 | -83.740 | 1.00 | 0.00 | B | C |
| ATOM | 5259 | OE1 | GLU A 179 | -37.913 | 33.743 | -83.813 | 1.00 | 0.00 | B | O |
| ATOM | 5260 | OE2 | GLU A 179 | -39.591 | 35.074 | -84.415 | 1.00 | 0.00 | B | O |
| ATOM | 5261 | C   | GLU A 179 | -38.517 | 36.895 | -80.028 | 1.00 | 0.00 | B | C |
| ATOM | 5262 | O   | GLU A 179 | -38.639 | 38.062 | -80.396 | 1.00 | 0.00 | B | O |

|      |      |     |           |         |        |         |      |      |   |   |
|------|------|-----|-----------|---------|--------|---------|------|------|---|---|
| ATOM | 5263 | N   | ILE A 180 | -39.475 | 36.257 | -79.334 | 1.00 | 0.00 | B | N |
| ATOM | 5264 | CA  | ILE A 180 | -40.719 | 36.896 | -79.029 | 1.00 | 0.00 | B | C |
| ATOM | 5265 | CB  | ILE A 180 | -41.702 | 35.996 | -78.339 | 1.00 | 0.00 | B | C |
| ATOM | 5266 | CG2 | ILE A 180 | -42.895 | 36.854 | -77.887 | 1.00 | 0.00 | B | C |
| ATOM | 5267 | CG1 | ILE A 180 | -42.099 | 34.844 | -79.274 | 1.00 | 0.00 | B | C |
| ATOM | 5268 | CD  | ILE A 180 | -42.932 | 33.764 | -78.593 | 1.00 | 0.00 | B | C |
| ATOM | 5269 | C   | ILE A 180 | -40.470 | 38.061 | -78.128 | 1.00 | 0.00 | B | C |
| ATOM | 5270 | O   | ILE A 180 | -41.126 | 39.095 | -78.250 | 1.00 | 0.00 | B | O |
| ATOM | 5271 | N   | ALA A 181 | -39.526 | 37.904 | -77.185 | 1.00 | 0.00 | B | N |
| ATOM | 5272 | CA  | ALA A 181 | -39.239 | 38.898 | -76.198 | 1.00 | 0.00 | B | C |
| ATOM | 5273 | CB  | ALA A 181 | -38.159 | 38.457 | -75.194 | 1.00 | 0.00 | B | C |
| ATOM | 5274 | C   | ALA A 181 | -38.754 | 40.157 | -76.831 | 1.00 | 0.00 | B | C |
| ATOM | 5275 | O   | ALA A 181 | -39.078 | 41.224 | -76.330 | 1.00 | 0.00 | B | O |
| ATOM | 5276 | N   | ARG A 182 | -37.920 | 40.088 | -77.884 | 1.00 | 0.00 | B | N |
| ATOM | 5277 | CA  | ARG A 182 | -37.403 | 41.276 | -78.517 | 1.00 | 0.00 | B | C |
| ATOM | 5278 | CB  | ARG A 182 | -36.193 | 41.012 | -79.438 | 1.00 | 0.00 | B | C |
| ATOM | 5279 | CG  | ARG A 182 | -36.454 | 40.017 | -80.566 | 1.00 | 0.00 | B | C |
| ATOM | 5280 | CD  | ARG A 182 | -35.244 | 39.774 | -81.476 | 1.00 | 0.00 | B | C |
| ATOM | 5281 | NE  | ARG A 182 | -34.183 | 39.082 | -80.688 | 1.00 | 0.00 | B | N |
| ATOM | 5282 | CZ  | ARG A 182 | -33.076 | 39.772 | -80.284 | 1.00 | 0.00 | B | C |
| ATOM | 5283 | NH1 | ARG A 182 | -32.933 | 41.086 | -80.623 | 1.00 | 0.00 | B | N |
| ATOM | 5284 | NH2 | ARG A 182 | -32.107 | 39.150 | -79.553 | 1.00 | 0.00 | B | N |
| ATOM | 5285 | C   | ARG A 182 | -38.464 | 42.003 | -79.288 | 1.00 | 0.00 | B | C |
| ATOM | 5286 | O   | ARG A 182 | -38.485 | 43.233 | -79.321 | 1.00 | 0.00 | B | O |
| ATOM | 5287 | N   | GLN A 183 | -39.385 | 41.263 | -79.935 | 1.00 | 0.00 | B | N |
| ATOM | 5288 | CA  | GLN A 183 | -40.393 | 41.906 | -80.725 | 1.00 | 0.00 | B | C |
| ATOM | 5289 | CB  | GLN A 183 | -41.280 | 40.909 | -81.495 | 1.00 | 0.00 | B | C |
| ATOM | 5290 | CG  | GLN A 183 | -40.455 | 40.120 | -82.521 | 1.00 | 0.00 | B | C |
| ATOM | 5291 | CD  | GLN A 183 | -41.376 | 39.322 | -83.427 | 1.00 | 0.00 | B | C |
| ATOM | 5292 | OE1 | GLN A 183 | -41.244 | 38.104 | -83.550 | 1.00 | 0.00 | B | O |
| ATOM | 5293 | NE2 | GLN A 183 | -42.316 | 40.033 | -84.107 | 1.00 | 0.00 | B | N |
| ATOM | 5294 | C   | GLN A 183 | -41.205 | 42.756 | -79.799 | 1.00 | 0.00 | B | C |
| ATOM | 5295 | O   | GLN A 183 | -41.731 | 43.799 | -80.187 | 1.00 | 0.00 | B | O |
| ATOM | 5296 | N   | THR A 184 | -41.397 | 42.271 | -78.561 | 1.00 | 0.00 | B | N |
| ATOM | 5297 | CA  | THR A 184 | -42.016 | 42.998 | -77.491 | 1.00 | 0.00 | B | C |
| ATOM | 5298 | CB  | THR A 184 | -42.573 | 42.094 | -76.437 | 1.00 | 0.00 | B | C |
| ATOM | 5299 | OG1 | THR A 184 | -43.484 | 41.177 | -77.025 | 1.00 | 0.00 | B | O |
| ATOM | 5300 | CG2 | THR A 184 | -43.306 | 42.958 | -75.397 | 1.00 | 0.00 | B | C |



|      |      |     |     |   |     |         |        |         |      |      |   |   |
|------|------|-----|-----|---|-----|---------|--------|---------|------|------|---|---|
| ATOM | 5301 | C   | THR | A | 184 | -41.009 | 43.920 | -76.858 | 1.00 | 0.00 | B | C |
| ATOM | 5302 | O   | THR | A | 184 | -41.364 | 44.873 | -76.168 | 1.00 | 0.00 | B | O |
| ATOM | 5303 | N   | ASP | A | 185 | -39.709 | 43.629 | -77.038 | 1.00 | 0.00 | B | N |
| ATOM | 5304 | CA  | ASP | A | 185 | -38.636 | 44.373 | -76.435 | 1.00 | 0.00 | B | C |
| ATOM | 5305 | CB  | ASP | A | 185 | -38.750 | 45.888 | -76.680 | 1.00 | 0.00 | B | C |
| ATOM | 5306 | CG  | ASP | A | 185 | -38.458 | 46.157 | -78.151 | 1.00 | 0.00 | B | C |
| ATOM | 5307 | OD1 | ASP | A | 185 | -37.525 | 45.511 | -78.700 | 1.00 | 0.00 | B | O |
| ATOM | 5308 | OD2 | ASP | A | 185 | -39.172 | 47.007 | -78.747 | 1.00 | 0.00 | B | O |
| ATOM | 5309 | C   | ASP | A | 185 | -38.620 | 44.147 | -74.953 | 1.00 | 0.00 | B | C |
| ATOM | 5310 | O   | ASP | A | 185 | -38.021 | 44.916 | -74.205 | 1.00 | 0.00 | B | O |
| ATOM | 5311 | N   | SER | A | 186 | -39.259 | 43.055 | -74.492 | 1.00 | 0.00 | B | N |
| ATOM | 5312 | CA  | SER | A | 186 | -39.186 | 42.619 | -73.127 | 1.00 | 0.00 | B | C |
| ATOM | 5313 | CB  | SER | A | 186 | -40.227 | 41.539 | -72.790 | 1.00 | 0.00 | B | C |
| ATOM | 5314 | OG  | SER | A | 186 | -41.538 | 42.068 | -72.939 | 1.00 | 0.00 | B | O |
| ATOM | 5315 | C   | SER | A | 186 | -37.843 | 41.970 | -72.981 | 1.00 | 0.00 | B | C |
| ATOM | 5316 | O   | SER | A | 186 | -37.472 | 41.497 | -71.907 | 1.00 | 0.00 | B | O |
| ATOM | 5317 | N   | LEU | A | 187 | -37.053 | 41.996 | -74.067 | 1.00 | 0.00 | B | N |
| ATOM | 5318 | CA  | LEU | A | 187 | -35.894 | 41.166 | -74.180 | 1.00 | 0.00 | B | C |
| ATOM | 5319 | CB  | LEU | A | 187 | -35.126 | 41.352 | -75.498 | 1.00 | 0.00 | B | C |
| ATOM | 5320 | CG  | LEU | A | 187 | -33.978 | 40.334 | -75.632 | 1.00 | 0.00 | B | C |
| ATOM | 5321 | CD1 | LEU | A | 187 | -34.521 | 38.897 | -75.655 | 1.00 | 0.00 | B | C |
| ATOM | 5322 | CD2 | LEU | A | 187 | -33.077 | 40.637 | -76.835 | 1.00 | 0.00 | B | C |
| ATOM | 5323 | C   | LEU | A | 187 | -34.914 | 41.308 | -73.050 | 1.00 | 0.00 | B | C |
| ATOM | 5324 | O   | LEU | A | 187 | -34.498 | 40.291 | -72.501 | 1.00 | 0.00 | B | O |
| ATOM | 5325 | N   | LYS | A | 188 | -34.516 | 42.526 | -72.644 | 1.00 | 0.00 | B | N |
| ATOM | 5326 | CA  | LYS | A | 188 | -33.485 | 42.606 | -71.636 | 1.00 | 0.00 | B | C |
| ATOM | 5327 | CB  | LYS | A | 188 | -33.058 | 44.047 | -71.319 | 1.00 | 0.00 | B | C |
| ATOM | 5328 | CG  | LYS | A | 188 | -32.004 | 44.107 | -70.213 | 1.00 | 0.00 | B | C |
| ATOM | 5329 | CD  | LYS | A | 188 | -31.349 | 45.475 | -70.033 | 1.00 | 0.00 | B | C |
| ATOM | 5330 | CE  | LYS | A | 188 | -30.017 | 45.618 | -70.767 | 1.00 | 0.00 | B | C |
| ATOM | 5331 | NZ  | LYS | A | 188 | -29.305 | 46.815 | -70.272 | 1.00 | 0.00 | B | N |
| ATOM | 5332 | C   | LYS | A | 188 | -33.922 | 42.003 | -70.331 | 1.00 | 0.00 | B | C |
| ATOM | 5333 | O   | LYS | A | 188 | -33.224 | 41.154 | -69.772 | 1.00 | 0.00 | B | O |
| ATOM | 5334 | N   | GLU | A | 189 | -35.098 | 42.417 | -69.821 | 1.00 | 0.00 | B | N |
| ATOM | 5335 | CA  | GLU | A | 189 | -35.563 | 41.985 | -68.531 | 1.00 | 0.00 | B | C |
| ATOM | 5336 | CB  | GLU | A | 189 | -36.804 | 42.750 | -68.017 | 1.00 | 0.00 | B | C |
| ATOM | 5337 | CG  | GLU | A | 189 | -38.047 | 42.663 | -68.906 | 1.00 | 0.00 | B | C |
| ATOM | 5338 | CD  | GLU | A | 189 | -38.117 | 43.929 | -69.749 | 1.00 | 0.00 | B | C |

ATOM 5339 OE1 GLU A 189 -37.165 44.170 -70.539 1.00 0.00 B O  
ATOM 5340 OE2 GLU A 189 -39.120 44.675 -69.611 1.00 0.00 B O  
ATOM 5341 C GLU A 189 -35.897 40.529 -68.567 1.00 0.00 B C  
ATOM 5342 O GLU A 189 -35.836 39.852 -67.542 1.00 0.00 B O  
ATOM 5343 N LEU A 190 -36.332 40.020 -69.737 1.00 0.00 B N  
ATOM 5344 CA LEU A 190 -36.699 38.637 -69.838 1.00 0.00 B C  
ATOM 5345 CB LEU A 190 -37.275 38.285 -71.219 1.00 0.00 B C  
ATOM 5346 CG LEU A 190 -37.657 36.799 -71.352 1.00 0.00 B C  
ATOM 5347 CD1 LEU A 190 -38.789 36.418 -70.389 1.00 0.00 B C  
ATOM 5348 CD2 LEU A 190 -37.964 36.434 -72.812 1.00 0.00 B C  
ATOM 5349 C LEU A 190 -35.508 37.753 -69.625 1.00 0.00 B C  
ATOM 5350 O LEU A 190 -35.533 36.835 -68.804 1.00 0.00 B O  
ATOM 5351 N VAL A 191 -34.415 38.036 -70.352 1.00 0.00 B N  
ATOM 5352 CA VAL A 191 -33.206 37.269 -70.291 1.00 0.00 B C  
ATOM 5353 CB VAL A 191 -32.208 37.678 -71.340 1.00 0.00 B C  
ATOM 5354 CG1 VAL A 191 -30.848 37.045 -71.017 1.00 0.00 B C  
ATOM 5355 CG2 VAL A 191 -32.740 37.215 -72.707 1.00 0.00 B C  
ATOM 5356 C VAL A 191 -32.586 37.409 -68.931 1.00 0.00 B C  
ATOM 5357 O VAL A 191 -31.824 36.539 -68.510 1.00 0.00 B O  
ATOM 5358 N ASN A 192 -32.845 38.523 -68.218 1.00 0.00 B N  
ATOM 5359 CA ASN A 192 -32.177 38.667 -66.952 1.00 0.00 B C  
ATOM 5360 CB ASN A 192 -31.519 40.046 -66.782 1.00 0.00 B C  
ATOM 5361 CG ASN A 192 -30.367 40.161 -67.768 1.00 0.00 B C  
ATOM 5362 OD1 ASN A 192 -29.674 39.188 -68.064 1.00 0.00 B O  
ATOM 5363 ND2 ASN A 192 -30.156 41.396 -68.298 1.00 0.00 B N  
ATOM 5364 C ASN A 192 -33.093 38.505 -65.765 1.00 0.00 B C  
ATOM 5365 O ASN A 192 -32.791 39.039 -64.698 1.00 0.00 B O  
ATOM 5366 N ALA A 193 -34.197 37.740 -65.869 1.00 0.00 B N  
ATOM 5367 CA ALA A 193 -35.040 37.580 -64.708 1.00 0.00 B C  
ATOM 5368 CB ALA A 193 -36.435 37.019 -65.032 1.00 0.00 B C  
ATOM 5369 C ALA A 193 -34.367 36.611 -63.780 1.00 0.00 B C  
ATOM 5370 O ALA A 193 -33.706 35.679 -64.230 1.00 0.00 B O  
ATOM 5371 N SER A 194 -34.544 36.787 -62.450 1.00 0.00 B N  
ATOM 5372 CA SER A 194 -33.850 35.939 -61.517 1.00 0.00 B C  
ATOM 5373 CB SER A 194 -32.764 36.685 -60.722 1.00 0.00 B C  
ATOM 5374 OG SER A 194 -33.338 37.751 -59.979 1.00 0.00 B O  
ATOM 5375 C SER A 194 -34.802 35.321 -60.530 1.00 0.00 B C  
ATOM 5376 O SER A 194 -35.936 35.768 -60.359 1.00 0.00 B O

|      |      |     |     |   |     |         |        |         |      |      |   |   |
|------|------|-----|-----|---|-----|---------|--------|---------|------|------|---|---|
| ATOM | 5377 | N   | TYR | A | 195 | -34.341 | 34.234 | -59.866 | 1.00 | 0.00 | B | N |
| ATOM | 5378 | CA  | TYR | A | 195 | -35.104 | 33.513 | -58.876 | 1.00 | 0.00 | B | C |
| ATOM | 5379 | CB  | TYR | A | 195 | -34.481 | 32.165 | -58.458 | 1.00 | 0.00 | B | C |
| ATOM | 5380 | CG  | TYR | A | 195 | -34.687 | 31.141 | -59.522 | 1.00 | 0.00 | B | C |
| ATOM | 5381 | CD1 | TYR | A | 195 | -33.887 | 31.086 | -60.640 | 1.00 | 0.00 | B | C |
| ATOM | 5382 | CE1 | TYR | A | 195 | -34.100 | 30.124 | -61.601 | 1.00 | 0.00 | B | C |
| ATOM | 5383 | CZ  | TYR | A | 195 | -35.110 | 29.204 | -61.449 | 1.00 | 0.00 | B | C |
| ATOM | 5384 | OH  | TYR | A | 195 | -35.331 | 28.217 | -62.433 | 1.00 | 0.00 | B | O |
| ATOM | 5385 | CD2 | TYR | A | 195 | -35.691 | 30.210 | -59.377 | 1.00 | 0.00 | B | C |
| ATOM | 5386 | CE2 | TYR | A | 195 | -35.907 | 29.248 | -60.332 | 1.00 | 0.00 | B | C |
| ATOM | 5387 | C   | TYR | A | 195 | -35.193 | 34.335 | -57.619 | 1.00 | 0.00 | B | C |
| ATOM | 5388 | O   | TYR | A | 195 | -34.225 | 34.966 | -57.207 | 1.00 | 0.00 | B | O |
| ATOM | 5389 | N   | THR | A | 196 | -36.414 | 34.443 | -57.068 | 1.00 | 0.00 | B | N |
| ATOM | 5390 | CA  | THR | A | 196 | -36.766 | 35.128 | -55.847 | 1.00 | 0.00 | B | C |
| ATOM | 5391 | CB  | THR | A | 196 | -38.162 | 35.667 | -55.904 | 1.00 | 0.00 | B | C |
| ATOM | 5392 | OG1 | THR | A | 196 | -39.097 | 34.604 | -56.012 | 1.00 | 0.00 | B | O |
| ATOM | 5393 | CG2 | THR | A | 196 | -38.270 | 36.583 | -57.134 | 1.00 | 0.00 | B | C |
| ATOM | 5394 | C   | THR | A | 196 | -36.641 | 34.311 | -54.584 | 1.00 | 0.00 | B | C |
| ATOM | 5395 | O   | THR | A | 196 | -36.428 | 34.873 | -53.512 | 1.00 | 0.00 | B | O |
| ATOM | 5396 | N   | ASP | A | 197 | -36.825 | 32.975 | -54.654 | 1.00 | 0.00 | B | N |
| ATOM | 5397 | CA  | ASP | A | 197 | -36.871 | 32.172 | -53.459 | 1.00 | 0.00 | B | C |
| ATOM | 5398 | CB  | ASP | A | 197 | -37.288 | 30.711 | -53.704 | 1.00 | 0.00 | B | C |
| ATOM | 5399 | CG  | ASP | A | 197 | -36.250 | 30.054 | -54.602 | 1.00 | 0.00 | B | C |
| ATOM | 5400 | OD1 | ASP | A | 197 | -35.698 | 30.757 | -55.490 | 1.00 | 0.00 | B | O |
| ATOM | 5401 | OD2 | ASP | A | 197 | -35.994 | 28.835 | -54.408 | 1.00 | 0.00 | B | O |
| ATOM | 5402 | C   | ASP | A | 197 | -35.524 | 32.176 | -52.809 | 1.00 | 0.00 | B | C |
| ATOM | 5403 | O   | ASP | A | 197 | -34.510 | 32.455 | -53.442 | 1.00 | 0.00 | B | O |
| ATOM | 5404 | N   | SER | A | 198 | -35.485 | 31.863 | -51.500 | 1.00 | 0.00 | B | N |
| ATOM | 5405 | CA  | SER | A | 198 | -34.255 | 31.935 | -50.767 | 1.00 | 0.00 | B | C |
| ATOM | 5406 | CB  | SER | A | 198 | -34.428 | 31.635 | -49.268 | 1.00 | 0.00 | B | C |
| ATOM | 5407 | OG  | SER | A | 198 | -34.839 | 30.291 | -49.078 | 1.00 | 0.00 | B | O |
| ATOM | 5408 | C   | SER | A | 198 | -33.266 | 30.950 | -51.308 | 1.00 | 0.00 | B | C |
| ATOM | 5409 | O   | SER | A | 198 | -32.058 | 31.172 | -51.228 | 1.00 | 0.00 | B | O |
| ATOM | 5410 | N   | TYR | A | 199 | -33.740 | 29.809 | -51.839 | 1.00 | 0.00 | B | N |
| ATOM | 5411 | CA  | TYR | A | 199 | -32.790 | 28.813 | -52.253 | 1.00 | 0.00 | B | C |
| ATOM | 5412 | CB  | TYR | A | 199 | -33.523 | 27.500 | -52.594 | 1.00 | 0.00 | B | C |
| ATOM | 5413 | CG  | TYR | A | 199 | -32.563 | 26.370 | -52.740 | 1.00 | 0.00 | B | C |
| ATOM | 5414 | CD1 | TYR | A | 199 | -31.903 | 25.887 | -51.635 | 1.00 | 0.00 | B | C |

|      |      |               |         |        |         |      |      |   |   |
|------|------|---------------|---------|--------|---------|------|------|---|---|
| ATOM | 5415 | CE1 TYR A 199 | -31.023 | 24.837 | -51.746 | 1.00 | 0.00 | B | C |
| ATOM | 5416 | CZ TYR A 199  | -30.804 | 24.248 | -52.965 | 1.00 | 0.00 | B | C |
| ATOM | 5417 | OH TYR A 199  | -29.903 | 23.169 | -53.066 | 1.00 | 0.00 | B | O |
| ATOM | 5418 | CD2 TYR A 199 | -32.353 | 25.763 | -53.958 | 1.00 | 0.00 | B | C |
| ATOM | 5419 | CE2 TYR A 199 | -31.474 | 24.709 | -54.075 | 1.00 | 0.00 | B | C |
| ATOM | 5420 | C TYR A 199   | -31.971 | 29.238 | -53.455 | 1.00 | 0.00 | B | C |
| ATOM | 5421 | O TYR A 199   | -30.751 | 29.385 | -53.372 | 1.00 | 0.00 | B | O |
| ATOM | 5422 | N TYR A 200   | -32.646 | 29.468 | -54.598 | 1.00 | 0.00 | B | N |
| ATOM | 5423 | CA TYR A 200  | -32.097 | 29.798 | -55.895 | 1.00 | 0.00 | B | C |
| ATOM | 5424 | CB TYR A 200  | -32.927 | 29.286 | -57.085 | 1.00 | 0.00 | B | C |
| ATOM | 5425 | CG TYR A 200  | -33.610 | 28.062 | -56.580 | 1.00 | 0.00 | B | C |
| ATOM | 5426 | CD1 TYR A 200 | -32.877 | 26.927 | -56.318 | 1.00 | 0.00 | B | C |
| ATOM | 5427 | CE1 TYR A 200 | -33.486 | 25.787 | -55.849 | 1.00 | 0.00 | B | C |
| ATOM | 5428 | CZ TYR A 200  | -34.844 | 25.773 | -55.645 | 1.00 | 0.00 | B | C |
| ATOM | 5429 | OH TYR A 200  | -35.476 | 24.608 | -55.164 | 1.00 | 0.00 | B | O |
| ATOM | 5430 | CD2 TYR A 200 | -34.970 | 28.037 | -56.382 | 1.00 | 0.00 | B | C |
| ATOM | 5431 | CE2 TYR A 200 | -35.586 | 26.900 | -55.914 | 1.00 | 0.00 | B | C |
| ATOM | 5432 | C TYR A 200   | -31.766 | 31.239 | -56.111 | 1.00 | 0.00 | B | C |
| ATOM | 5433 | O TYR A 200   | -31.154 | 31.572 | -57.127 | 1.00 | 0.00 | B | O |
| ATOM | 5434 | N LYS A 201   | -32.274 | 32.125 | -55.231 | 1.00 | 0.00 | B | N |
| ATOM | 5435 | CA LYS A 201  | -32.300 | 33.555 | -55.411 | 1.00 | 0.00 | B | C |
| ATOM | 5436 | CB LYS A 201  | -32.490 | 34.362 | -54.111 | 1.00 | 0.00 | B | C |
| ATOM | 5437 | CG LYS A 201  | -31.376 | 34.194 | -53.082 | 1.00 | 0.00 | B | C |
| ATOM | 5438 | CD LYS A 201  | -31.400 | 35.260 | -51.986 | 1.00 | 0.00 | B | C |
| ATOM | 5439 | CE LYS A 201  | -32.796 | 35.814 | -51.702 | 1.00 | 0.00 | B | C |
| ATOM | 5440 | NZ LYS A 201  | -33.644 | 34.772 | -51.081 | 1.00 | 0.00 | B | N |
| ATOM | 5441 | C LYS A 201   | -31.142 | 34.117 | -56.179 | 1.00 | 0.00 | B | C |
| ATOM | 5442 | O LYS A 201   | -29.974 | 33.828 | -55.931 | 1.00 | 0.00 | B | O |
| ATOM | 5443 | N GLY A 202   | -31.499 | 34.918 | -57.204 | 1.00 | 0.00 | B | N |
| ATOM | 5444 | CA GLY A 202  | -30.565 | 35.639 | -58.012 | 1.00 | 0.00 | B | C |
| ATOM | 5445 | C GLY A 202   | -30.083 | 34.808 | -59.164 | 1.00 | 0.00 | B | C |
| ATOM | 5446 | O GLY A 202   | -29.279 | 35.286 | -59.966 | 1.00 | 0.00 | B | O |
| ATOM | 5447 | N GLN A 203   | -30.544 | 33.548 | -59.293 | 1.00 | 0.00 | B | N |
| ATOM | 5448 | CA GLN A 203  | -30.090 | 32.753 | -60.400 | 1.00 | 0.00 | B | C |
| ATOM | 5449 | CB GLN A 203  | -30.300 | 31.236 | -60.219 | 1.00 | 0.00 | B | C |
| ATOM | 5450 | CG GLN A 203  | -29.795 | 30.405 | -61.404 | 1.00 | 0.00 | B | C |
| ATOM | 5451 | CD GLN A 203  | -29.976 | 28.931 | -61.067 | 1.00 | 0.00 | B | C |
| ATOM | 5452 | OE1 GLN A 203 | -31.070 | 28.482 | -60.724 | 1.00 | 0.00 | B | O |

|      |      |     |     |   |     |         |        |         |      |      |   |   |
|------|------|-----|-----|---|-----|---------|--------|---------|------|------|---|---|
| ATOM | 5453 | NE2 | GLN | A | 203 | -28.867 | 28.150 | -61.163 | 1.00 | 0.00 | B | N |
| ATOM | 5454 | C   | GLN | A | 203 | -30.812 | 33.184 | -61.639 | 1.00 | 0.00 | B | C |
| ATOM | 5455 | O   | GLN | A | 203 | -32.023 | 33.413 | -61.632 | 1.00 | 0.00 | B | O |
| ATOM | 5456 | N   | THR | A | 204 | -30.051 | 33.289 | -62.748 | 1.00 | 0.00 | B | N |
| ATOM | 5457 | CA  | THR | A | 204 | -30.542 | 33.703 | -64.032 | 1.00 | 0.00 | B | C |
| ATOM | 5458 | CB  | THR | A | 204 | -29.813 | 34.889 | -64.591 | 1.00 | 0.00 | B | C |
| ATOM | 5459 | OG1 | THR | A | 204 | -28.442 | 34.570 | -64.773 | 1.00 | 0.00 | B | O |
| ATOM | 5460 | CG2 | THR | A | 204 | -29.956 | 36.072 | -63.618 | 1.00 | 0.00 | B | C |
| ATOM | 5461 | C   | THR | A | 204 | -30.289 | 32.574 | -64.979 | 1.00 | 0.00 | B | C |
| ATOM | 5462 | O   | THR | A | 204 | -29.633 | 31.594 | -64.635 | 1.00 | 0.00 | B | O |
| ATOM | 5463 | N   | ALA | A | 205 | -30.812 | 32.692 | -66.216 | 1.00 | 0.00 | B | N |
| ATOM | 5464 | CA  | ALA | A | 205 | -30.656 | 31.665 | -67.206 | 1.00 | 0.00 | B | C |
| ATOM | 5465 | CB  | ALA | A | 205 | -31.337 | 32.016 | -68.538 | 1.00 | 0.00 | B | C |
| ATOM | 5466 | C   | ALA | A | 205 | -29.195 | 31.462 | -67.485 | 1.00 | 0.00 | B | C |
| ATOM | 5467 | O   | ALA | A | 205 | -28.742 | 30.332 | -67.652 | 1.00 | 0.00 | B | O |
| ATOM | 5468 | N   | LEU | A | 206 | -28.402 | 32.549 | -67.525 | 1.00 | 0.00 | B | N |
| ATOM | 5469 | CA  | LEU | A | 206 | -27.005 | 32.427 | -67.842 | 1.00 | 0.00 | B | C |
| ATOM | 5470 | CB  | LEU | A | 206 | -26.275 | 33.782 | -67.892 | 1.00 | 0.00 | B | C |
| ATOM | 5471 | CG  | LEU | A | 206 | -24.793 | 33.662 | -68.295 | 1.00 | 0.00 | B | C |
| ATOM | 5472 | CD1 | LEU | A | 206 | -24.655 | 33.006 | -69.676 | 1.00 | 0.00 | B | C |
| ATOM | 5473 | CD2 | LEU | A | 206 | -24.078 | 35.022 | -68.231 | 1.00 | 0.00 | B | C |
| ATOM | 5474 | C   | LEU | A | 206 | -26.330 | 31.556 | -66.823 | 1.00 | 0.00 | B | C |
| ATOM | 5475 | O   | LEU | A | 206 | -25.418 | 30.800 | -67.156 | 1.00 | 0.00 | B | O |
| ATOM | 5476 | N   | HSD | A | 207 | -26.749 | 31.633 | -65.547 | 1.00 | 0.00 | B | N |
| ATOM | 5477 | CA  | HSD | A | 207 | -26.105 | 30.816 | -64.554 | 1.00 | 0.00 | B | C |
| ATOM | 5478 | CB  | HSD | A | 207 | -26.703 | 30.971 | -63.142 | 1.00 | 0.00 | B | C |
| ATOM | 5479 | ND1 | HSD | A | 207 | -27.256 | 33.390 | -62.589 | 1.00 | 0.00 | B | N |
| ATOM | 5480 | CG  | HSD | A | 207 | -26.428 | 32.294 | -62.499 | 1.00 | 0.00 | B | C |
| ATOM | 5481 | CE1 | HSD | A | 207 | -26.677 | 34.383 | -61.867 | 1.00 | 0.00 | B | C |
| ATOM | 5482 | NE2 | HSD | A | 207 | -25.536 | 33.999 | -61.321 | 1.00 | 0.00 | B | N |
| ATOM | 5483 | CD2 | HSD | A | 207 | -25.382 | 32.685 | -61.720 | 1.00 | 0.00 | B | C |
| ATOM | 5484 | C   | HSD | A | 207 | -26.296 | 29.379 | -64.932 | 1.00 | 0.00 | B | C |
| ATOM | 5485 | O   | HSD | A | 207 | -25.353 | 28.590 | -64.918 | 1.00 | 0.00 | B | O |
| ATOM | 5486 | N   | ILE | A | 208 | -27.533 | 29.012 | -65.319 | 1.00 | 0.00 | B | N |
| ATOM | 5487 | CA  | ILE | A | 208 | -27.888 | 27.654 | -65.614 | 1.00 | 0.00 | B | C |
| ATOM | 5488 | CB  | ILE | A | 208 | -29.350 | 27.504 | -65.937 | 1.00 | 0.00 | B | C |
| ATOM | 5489 | CG2 | ILE | A | 208 | -29.588 | 26.081 | -66.467 | 1.00 | 0.00 | B | C |
| ATOM | 5490 | CG1 | ILE | A | 208 | -30.207 | 27.859 | -64.707 | 1.00 | 0.00 | B | C |

|      |      |     |     |   |     |         |        |         |      |      |   |   |
|------|------|-----|-----|---|-----|---------|--------|---------|------|------|---|---|
| ATOM | 5491 | CD  | ILE | A | 208 | -31.700 | 27.993 | -65.012 | 1.00 | 0.00 | B | C |
| ATOM | 5492 | C   | ILE | A | 208 | -27.096 | 27.133 | -66.777 | 1.00 | 0.00 | B | C |
| ATOM | 5493 | O   | ILE | A | 208 | -26.647 | 25.986 | -66.757 | 1.00 | 0.00 | B | O |
| ATOM | 5494 | N   | ALA | A | 209 | -26.897 | 27.957 | -67.821 | 1.00 | 0.00 | B | N |
| ATOM | 5495 | CA  | ALA | A | 209 | -26.211 | 27.515 | -69.005 | 1.00 | 0.00 | B | C |
| ATOM | 5496 | CB  | ALA | A | 209 | -26.106 | 28.614 | -70.075 | 1.00 | 0.00 | B | C |
| ATOM | 5497 | C   | ALA | A | 209 | -24.821 | 27.104 | -68.645 | 1.00 | 0.00 | B | C |
| ATOM | 5498 | O   | ALA | A | 209 | -24.297 | 26.129 | -69.182 | 1.00 | 0.00 | B | O |
| ATOM | 5499 | N   | ILE | A | 210 | -24.173 | 27.876 | -67.758 | 1.00 | 0.00 | B | N |
| ATOM | 5500 | CA  | ILE | A | 210 | -22.833 | 27.578 | -67.337 | 1.00 | 0.00 | B | C |
| ATOM | 5501 | CB  | ILE | A | 210 | -22.223 | 28.689 | -66.535 | 1.00 | 0.00 | B | C |
| ATOM | 5502 | CG2 | ILE | A | 210 | -20.851 | 28.222 | -66.018 | 1.00 | 0.00 | B | C |
| ATOM | 5503 | CG1 | ILE | A | 210 | -22.150 | 29.966 | -67.385 | 1.00 | 0.00 | B | C |
| ATOM | 5504 | CD  | ILE | A | 210 | -21.807 | 31.214 | -66.578 | 1.00 | 0.00 | B | C |
| ATOM | 5505 | C   | ILE | A | 210 | -22.825 | 26.336 | -66.503 | 1.00 | 0.00 | B | C |
| ATOM | 5506 | O   | ILE | A | 210 | -21.997 | 25.450 | -66.700 | 1.00 | 0.00 | B | O |
| ATOM | 5507 | N   | GLU | A | 211 | -23.782 | 26.222 | -65.565 | 1.00 | 0.00 | B | N |
| ATOM | 5508 | CA  | GLU | A | 211 | -23.822 | 25.087 | -64.690 | 1.00 | 0.00 | B | C |
| ATOM | 5509 | CB  | GLU | A | 211 | -25.009 | 25.162 | -63.719 | 1.00 | 0.00 | B | C |
| ATOM | 5510 | CG  | GLU | A | 211 | -24.793 | 26.257 | -62.669 | 1.00 | 0.00 | B | C |
| ATOM | 5511 | CD  | GLU | A | 211 | -26.104 | 26.557 | -61.965 | 1.00 | 0.00 | B | C |
| ATOM | 5512 | OE1 | GLU | A | 211 | -27.178 | 26.298 | -62.571 | 1.00 | 0.00 | B | O |
| ATOM | 5513 | OE2 | GLU | A | 211 | -26.051 | 27.064 | -60.813 | 1.00 | 0.00 | B | O |
| ATOM | 5514 | C   | GLU | A | 211 | -23.921 | 23.865 | -65.553 | 1.00 | 0.00 | B | C |
| ATOM | 5515 | O   | GLU | A | 211 | -23.371 | 22.814 | -65.234 | 1.00 | 0.00 | B | O |
| ATOM | 5516 | N   | ARG | A | 212 | -24.646 | 23.994 | -66.673 | 1.00 | 0.00 | B | N |
| ATOM | 5517 | CA  | ARG | A | 212 | -24.859 | 22.973 | -67.659 | 1.00 | 0.00 | B | C |
| ATOM | 5518 | CB  | ARG | A | 212 | -26.014 | 23.322 | -68.613 | 1.00 | 0.00 | B | C |
| ATOM | 5519 | CG  | ARG | A | 212 | -27.352 | 23.428 | -67.879 | 1.00 | 0.00 | B | C |
| ATOM | 5520 | CD  | ARG | A | 212 | -27.596 | 22.265 | -66.914 | 1.00 | 0.00 | B | C |
| ATOM | 5521 | NE  | ARG | A | 212 | -28.943 | 22.445 | -66.305 | 1.00 | 0.00 | B | N |
| ATOM | 5522 | CZ  | ARG | A | 212 | -29.096 | 22.368 | -64.953 | 1.00 | 0.00 | B | C |
| ATOM | 5523 | NH1 | ARG | A | 212 | -28.003 | 22.187 | -64.153 | 1.00 | 0.00 | B | N |
| ATOM | 5524 | NH2 | ARG | A | 212 | -30.340 | 22.471 | -64.399 | 1.00 | 0.00 | B | N |
| ATOM | 5525 | C   | ARG | A | 212 | -23.621 | 22.722 | -68.470 | 1.00 | 0.00 | B | C |
| ATOM | 5526 | O   | ARG | A | 212 | -23.501 | 21.673 | -69.101 | 1.00 | 0.00 | B | O |
| ATOM | 5527 | N   | ARG | A | 213 | -22.681 | 23.688 | -68.514 | 1.00 | 0.00 | B | N |
| ATOM | 5528 | CA  | ARG | A | 213 | -21.492 | 23.549 | -69.309 | 1.00 | 0.00 | B | C |

|      |      |     |     |   |     |         |        |         |      |      |   |   |
|------|------|-----|-----|---|-----|---------|--------|---------|------|------|---|---|
| ATOM | 5529 | CB  | ARG | A | 213 | -20.753 | 22.225 | -69.071 | 1.00 | 0.00 | B | C |
| ATOM | 5530 | CG  | ARG | A | 213 | -20.211 | 22.081 | -67.656 | 1.00 | 0.00 | B | C |
| ATOM | 5531 | CD  | ARG | A | 213 | -19.459 | 20.771 | -67.424 | 1.00 | 0.00 | B | C |
| ATOM | 5532 | NE  | ARG | A | 213 | -18.956 | 20.815 | -66.027 | 1.00 | 0.00 | B | N |
| ATOM | 5533 | CZ  | ARG | A | 213 | -17.758 | 21.407 | -65.746 | 1.00 | 0.00 | B | C |
| ATOM | 5534 | NH1 | ARG | A | 213 | -16.976 | 21.908 | -66.747 | 1.00 | 0.00 | B | N |
| ATOM | 5535 | NH2 | ARG | A | 213 | -17.355 | 21.505 | -64.450 | 1.00 | 0.00 | B | N |
| ATOM | 5536 | C   | ARG | A | 213 | -21.858 | 23.574 | -70.758 | 1.00 | 0.00 | B | C |
| ATOM | 5537 | O   | ARG | A | 213 | -21.307 | 22.810 | -71.551 | 1.00 | 0.00 | B | O |
| ATOM | 5538 | N   | ASN | A | 214 | -22.811 | 24.445 | -71.155 | 1.00 | 0.00 | B | N |
| ATOM | 5539 | CA  | ASN | A | 214 | -23.096 | 24.489 | -72.561 | 1.00 | 0.00 | B | C |
| ATOM | 5540 | CB  | ASN | A | 214 | -24.527 | 24.061 | -72.974 | 1.00 | 0.00 | B | C |
| ATOM | 5541 | CG  | ASN | A | 214 | -25.618 | 24.937 | -72.382 | 1.00 | 0.00 | B | C |
| ATOM | 5542 | OD1 | ASN | A | 214 | -25.396 | 25.962 | -71.743 | 1.00 | 0.00 | B | O |
| ATOM | 5543 | ND2 | ASN | A | 214 | -26.883 | 24.486 | -72.596 | 1.00 | 0.00 | B | N |
| ATOM | 5544 | C   | ASN | A | 214 | -22.723 | 25.824 | -73.126 | 1.00 | 0.00 | B | C |
| ATOM | 5545 | O   | ASN | A | 214 | -23.320 | 26.864 | -72.848 | 1.00 | 0.00 | B | O |
| ATOM | 5546 | N   | MET | A | 215 | -21.683 | 25.811 | -73.973 | 1.00 | 0.00 | B | N |
| ATOM | 5547 | CA  | MET | A | 215 | -21.143 | 27.012 | -74.535 | 1.00 | 0.00 | B | C |
| ATOM | 5548 | CB  | MET | A | 215 | -19.906 | 26.721 | -75.402 | 1.00 | 0.00 | B | C |
| ATOM | 5549 | CG  | MET | A | 215 | -18.809 | 27.791 | -75.343 | 1.00 | 0.00 | B | C |
| ATOM | 5550 | SD  | MET | A | 215 | -19.272 | 29.469 | -75.853 | 1.00 | 0.00 | B | S |
| ATOM | 5551 | CE  | MET | A | 215 | -20.131 | 29.918 | -74.319 | 1.00 | 0.00 | B | C |
| ATOM | 5552 | C   | MET | A | 215 | -22.197 | 27.634 | -75.398 | 1.00 | 0.00 | B | C |
| ATOM | 5553 | O   | MET | A | 215 | -22.428 | 28.841 | -75.348 | 1.00 | 0.00 | B | O |
| ATOM | 5554 | N   | ALA | A | 216 | -22.917 | 26.804 | -76.170 | 1.00 | 0.00 | B | N |
| ATOM | 5555 | CA  | ALA | A | 216 | -23.849 | 27.334 | -77.119 | 1.00 | 0.00 | B | C |
| ATOM | 5556 | CB  | ALA | A | 216 | -24.616 | 26.232 | -77.859 | 1.00 | 0.00 | B | C |
| ATOM | 5557 | C   | ALA | A | 216 | -24.864 | 28.181 | -76.414 | 1.00 | 0.00 | B | C |
| ATOM | 5558 | O   | ALA | A | 216 | -25.190 | 29.268 | -76.887 | 1.00 | 0.00 | B | O |
| ATOM | 5559 | N   | LEU | A | 217 | -25.398 | 27.708 | -75.272 | 1.00 | 0.00 | B | N |
| ATOM | 5560 | CA  | LEU | A | 217 | -26.375 | 28.489 | -74.569 | 1.00 | 0.00 | B | C |
| ATOM | 5561 | CB  | LEU | A | 217 | -27.160 | 27.741 | -73.476 | 1.00 | 0.00 | B | C |
| ATOM | 5562 | CG  | LEU | A | 217 | -28.152 | 26.702 | -74.030 | 1.00 | 0.00 | B | C |
| ATOM | 5563 | CD1 | LEU | A | 217 | -29.131 | 26.231 | -72.941 | 1.00 | 0.00 | B | C |
| ATOM | 5564 | CD2 | LEU | A | 217 | -28.864 | 27.224 | -75.289 | 1.00 | 0.00 | B | C |
| ATOM | 5565 | C   | LEU | A | 217 | -25.751 | 29.692 | -73.944 | 1.00 | 0.00 | B | C |
| ATOM | 5566 | O   | LEU | A | 217 | -26.383 | 30.742 | -73.854 | 1.00 | 0.00 | B | O |

|      |      |     |           |         |        |         |      |      |   |   |
|------|------|-----|-----------|---------|--------|---------|------|------|---|---|
| ATOM | 5567 | N   | VAL A 218 | -24.506 | 29.571 | -73.445 | 1.00 | 0.00 | B | N |
| ATOM | 5568 | CA  | VAL A 218 | -23.895 | 30.730 | -72.862 | 1.00 | 0.00 | B | C |
| ATOM | 5569 | CB  | VAL A 218 | -22.503 | 30.464 | -72.361 | 1.00 | 0.00 | B | C |
| ATOM | 5570 | CG1 | VAL A 218 | -21.861 | 31.800 | -71.950 | 1.00 | 0.00 | B | C |
| ATOM | 5571 | CG2 | VAL A 218 | -22.583 | 29.437 | -71.219 | 1.00 | 0.00 | B | C |
| ATOM | 5572 | C   | VAL A 218 | -23.797 | 31.758 | -73.943 | 1.00 | 0.00 | B | C |
| ATOM | 5573 | O   | VAL A 218 | -24.221 | 32.900 | -73.776 | 1.00 | 0.00 | B | O |
| ATOM | 5574 | N   | THR A 219 | -23.303 | 31.343 | -75.122 | 1.00 | 0.00 | B | N |
| ATOM | 5575 | CA  | THR A 219 | -23.088 | 32.256 | -76.206 | 1.00 | 0.00 | B | C |
| ATOM | 5576 | CB  | THR A 219 | -22.637 | 31.565 | -77.460 | 1.00 | 0.00 | B | C |
| ATOM | 5577 | OG1 | THR A 219 | -21.458 | 30.816 | -77.212 | 1.00 | 0.00 | B | O |
| ATOM | 5578 | CG2 | THR A 219 | -22.367 | 32.626 | -78.541 | 1.00 | 0.00 | B | C |
| ATOM | 5579 | C   | THR A 219 | -24.387 | 32.912 | -76.541 | 1.00 | 0.00 | B | C |
| ATOM | 5580 | O   | THR A 219 | -24.454 | 34.129 | -76.701 | 1.00 | 0.00 | B | O |
| ATOM | 5581 | N   | LEU A 220 | -25.468 | 32.121 | -76.638 | 1.00 | 0.00 | B | N |
| ATOM | 5582 | CA  | LEU A 220 | -26.714 | 32.682 | -77.073 | 1.00 | 0.00 | B | C |
| ATOM | 5583 | CB  | LEU A 220 | -27.821 | 31.625 | -77.229 | 1.00 | 0.00 | B | C |
| ATOM | 5584 | CG  | LEU A 220 | -29.161 | 32.199 | -77.728 | 1.00 | 0.00 | B | C |
| ATOM | 5585 | CD1 | LEU A 220 | -29.016 | 32.808 | -79.133 | 1.00 | 0.00 | B | C |
| ATOM | 5586 | CD2 | LEU A 220 | -30.280 | 31.146 | -77.657 | 1.00 | 0.00 | B | C |
| ATOM | 5587 | C   | LEU A 220 | -27.190 | 33.716 | -76.096 | 1.00 | 0.00 | B | C |
| ATOM | 5588 | O   | LEU A 220 | -27.573 | 34.811 | -76.497 | 1.00 | 0.00 | B | O |
| ATOM | 5589 | N   | LEU A 221 | -27.147 | 33.416 | -74.781 | 1.00 | 0.00 | B | N |
| ATOM | 5590 | CA  | LEU A 221 | -27.683 | 34.326 | -73.803 | 1.00 | 0.00 | B | C |
| ATOM | 5591 | CB  | LEU A 221 | -27.699 | 33.762 | -72.373 | 1.00 | 0.00 | B | C |
| ATOM | 5592 | CG  | LEU A 221 | -28.862 | 32.784 | -72.117 | 1.00 | 0.00 | B | C |
| ATOM | 5593 | CD1 | LEU A 221 | -28.884 | 31.629 | -73.127 | 1.00 | 0.00 | B | C |
| ATOM | 5594 | CD2 | LEU A 221 | -28.849 | 32.292 | -70.663 | 1.00 | 0.00 | B | C |
| ATOM | 5595 | C   | LEU A 221 | -26.938 | 35.624 | -73.794 | 1.00 | 0.00 | B | C |
| ATOM | 5596 | O   | LEU A 221 | -27.549 | 36.685 | -73.687 | 1.00 | 0.00 | B | O |
| ATOM | 5597 | N   | VAL A 222 | -25.600 | 35.574 | -73.908 | 1.00 | 0.00 | B | N |
| ATOM | 5598 | CA  | VAL A 222 | -24.785 | 36.758 | -73.886 | 1.00 | 0.00 | B | C |
| ATOM | 5599 | CB  | VAL A 222 | -23.318 | 36.447 | -73.968 | 1.00 | 0.00 | B | C |
| ATOM | 5600 | CG1 | VAL A 222 | -22.542 | 37.765 | -74.128 | 1.00 | 0.00 | B | C |
| ATOM | 5601 | CG2 | VAL A 222 | -22.920 | 35.645 | -72.717 | 1.00 | 0.00 | B | C |
| ATOM | 5602 | C   | VAL A 222 | -25.130 | 37.639 | -75.053 | 1.00 | 0.00 | B | C |
| ATOM | 5603 | O   | VAL A 222 | -25.139 | 38.862 | -74.931 | 1.00 | 0.00 | B | O |
| ATOM | 5604 | N   | GLU A 223 | -25.389 | 37.040 | -76.233 | 1.00 | 0.00 | B | N |



|      |      |     |           |         |        |         |      |      |   |   |
|------|------|-----|-----------|---------|--------|---------|------|------|---|---|
| ATOM | 5605 | CA  | GLU A 223 | -25.717 | 37.803 | -77.408 | 1.00 | 0.00 | B | C |
| ATOM | 5606 | CB  | GLU A 223 | -25.768 | 36.957 | -78.692 | 1.00 | 0.00 | B | C |
| ATOM | 5607 | CG  | GLU A 223 | -24.382 | 36.478 | -79.125 | 1.00 | 0.00 | B | C |
| ATOM | 5608 | CD  | GLU A 223 | -24.495 | 35.821 | -80.491 | 1.00 | 0.00 | B | C |
| ATOM | 5609 | OE1 | GLU A 223 | -25.630 | 35.434 | -80.876 | 1.00 | 0.00 | B | O |
| ATOM | 5610 | OE2 | GLU A 223 | -23.442 | 35.702 | -81.172 | 1.00 | 0.00 | B | O |
| ATOM | 5611 | C   | GLU A 223 | -27.043 | 38.472 | -77.218 | 1.00 | 0.00 | B | C |
| ATOM | 5612 | O   | GLU A 223 | -27.278 | 39.571 | -77.717 | 1.00 | 0.00 | B | O |
| ATOM | 5613 | N   | ASN A 224 | -27.958 | 37.782 | -76.517 | 1.00 | 0.00 | B | N |
| ATOM | 5614 | CA  | ASN A 224 | -29.280 | 38.224 | -76.172 | 1.00 | 0.00 | B | C |
| ATOM | 5615 | CB  | ASN A 224 | -30.153 | 37.108 | -75.589 | 1.00 | 0.00 | B | C |
| ATOM | 5616 | CG  | ASN A 224 | -30.339 | 36.078 | -76.686 | 1.00 | 0.00 | B | C |
| ATOM | 5617 | OD1 | ASN A 224 | -30.569 | 36.408 | -77.847 | 1.00 | 0.00 | B | O |
| ATOM | 5618 | ND2 | ASN A 224 | -30.219 | 34.782 | -76.303 | 1.00 | 0.00 | B | N |
| ATOM | 5619 | C   | ASN A 224 | -29.176 | 39.283 | -75.119 | 1.00 | 0.00 | B | C |
| ATOM | 5620 | O   | ASN A 224 | -30.174 | 39.914 | -74.774 | 1.00 | 0.00 | B | O |
| ATOM | 5621 | N   | GLY A 225 | -27.991 | 39.442 | -74.493 | 1.00 | 0.00 | B | N |
| ATOM | 5622 | CA  | GLY A 225 | -27.869 | 40.520 | -73.554 | 1.00 | 0.00 | B | C |
| ATOM | 5623 | C   | GLY A 225 | -27.980 | 40.064 | -72.132 | 1.00 | 0.00 | B | C |
| ATOM | 5624 | O   | GLY A 225 | -28.374 | 40.846 | -71.269 | 1.00 | 0.00 | B | O |
| ATOM | 5625 | N   | ALA A 226 | -27.649 | 38.791 | -71.837 | 1.00 | 0.00 | B | N |
| ATOM | 5626 | CA  | ALA A 226 | -27.692 | 38.366 | -70.466 | 1.00 | 0.00 | B | C |
| ATOM | 5627 | CB  | ALA A 226 | -27.397 | 36.870 | -70.269 | 1.00 | 0.00 | B | C |
| ATOM | 5628 | C   | ALA A 226 | -26.664 | 39.143 | -69.694 | 1.00 | 0.00 | B | C |
| ATOM | 5629 | O   | ALA A 226 | -25.568 | 39.418 | -70.185 | 1.00 | 0.00 | B | O |
| ATOM | 5630 | N   | ASP A 227 | -27.025 | 39.542 | -68.454 | 1.00 | 0.00 | B | N |
| ATOM | 5631 | CA  | ASP A 227 | -26.149 | 40.273 | -67.584 | 1.00 | 0.00 | B | C |
| ATOM | 5632 | CB  | ASP A 227 | -26.869 | 40.837 | -66.349 | 1.00 | 0.00 | B | C |
| ATOM | 5633 | CG  | ASP A 227 | -25.894 | 41.696 | -65.562 | 1.00 | 0.00 | B | C |
| ATOM | 5634 | OD1 | ASP A 227 | -24.767 | 41.941 | -66.072 | 1.00 | 0.00 | B | O |
| ATOM | 5635 | OD2 | ASP A 227 | -26.261 | 42.119 | -64.433 | 1.00 | 0.00 | B | O |
| ATOM | 5636 | C   | ASP A 227 | -25.095 | 39.327 | -67.094 | 1.00 | 0.00 | B | C |
| ATOM | 5637 | O   | ASP A 227 | -25.386 | 38.340 | -66.420 | 1.00 | 0.00 | B | O |
| ATOM | 5638 | N   | VAL A 228 | -23.831 | 39.629 | -67.432 | 1.00 | 0.00 | B | N |
| ATOM | 5639 | CA  | VAL A 228 | -22.685 | 38.835 | -67.088 | 1.00 | 0.00 | B | C |
| ATOM | 5640 | CB  | VAL A 228 | -21.467 | 39.225 | -67.875 | 1.00 | 0.00 | B | C |
| ATOM | 5641 | CG1 | VAL A 228 | -20.252 | 38.452 | -67.335 | 1.00 | 0.00 | B | C |
| ATOM | 5642 | CG2 | VAL A 228 | -21.747 | 38.955 | -69.365 | 1.00 | 0.00 | B | C |

|      |      |     |           |         |        |         |      |      |   |   |
|------|------|-----|-----------|---------|--------|---------|------|------|---|---|
| ATOM | 5643 | C   | VAL A 228 | -22.360 | 38.935 | -65.621 | 1.00 | 0.00 | B | C |
| ATOM | 5644 | O   | VAL A 228 | -21.725 | 38.044 | -65.057 | 1.00 | 0.00 | B | O |
| ATOM | 5645 | N   | GLN A 229 | -22.683 | 40.086 | -65.009 | 1.00 | 0.00 | B | N |
| ATOM | 5646 | CA  | GLN A 229 | -22.445 | 40.421 | -63.627 | 1.00 | 0.00 | B | C |
| ATOM | 5647 | CB  | GLN A 229 | -22.348 | 41.933 | -63.380 | 1.00 | 0.00 | B | C |
| ATOM | 5648 | CG  | GLN A 229 | -21.106 | 42.533 | -64.041 | 1.00 | 0.00 | B | C |
| ATOM | 5649 | CD  | GLN A 229 | -19.911 | 41.697 | -63.594 | 1.00 | 0.00 | B | C |
| ATOM | 5650 | OE1 | GLN A 229 | -19.576 | 40.689 | -64.211 | 1.00 | 0.00 | B | O |
| ATOM | 5651 | NE2 | GLN A 229 | -19.255 | 42.121 | -62.483 | 1.00 | 0.00 | B | N |
| ATOM | 5652 | C   | GLN A 229 | -23.426 | 39.827 | -62.644 | 1.00 | 0.00 | B | C |
| ATOM | 5653 | O   | GLN A 229 | -23.173 | 39.880 | -61.442 | 1.00 | 0.00 | B | O |
| ATOM | 5654 | N   | ALA A 230 | -24.604 | 39.340 | -63.088 | 1.00 | 0.00 | B | N |
| ATOM | 5655 | CA  | ALA A 230 | -25.636 | 38.905 | -62.174 | 1.00 | 0.00 | B | C |
| ATOM | 5656 | CB  | ALA A 230 | -26.833 | 38.237 | -62.875 | 1.00 | 0.00 | B | C |
| ATOM | 5657 | C   | ALA A 230 | -25.115 | 37.922 | -61.165 | 1.00 | 0.00 | B | C |
| ATOM | 5658 | O   | ALA A 230 | -24.467 | 36.936 | -61.507 | 1.00 | 0.00 | B | O |
| ATOM | 5659 | N   | ALA A 231 | -25.442 | 38.157 | -59.876 | 1.00 | 0.00 | B | N |
| ATOM | 5660 | CA  | ALA A 231 | -24.939 | 37.307 | -58.831 | 1.00 | 0.00 | B | C |
| ATOM | 5661 | CB  | ALA A 231 | -24.449 | 38.089 | -57.599 | 1.00 | 0.00 | B | C |
| ATOM | 5662 | C   | ALA A 231 | -26.012 | 36.378 | -58.352 | 1.00 | 0.00 | B | C |
| ATOM | 5663 | O   | ALA A 231 | -27.093 | 36.806 | -57.949 | 1.00 | 0.00 | B | O |
| ATOM | 5664 | N   | ALA A 232 | -25.721 | 35.059 | -58.380 | 1.00 | 0.00 | B | N |
| ATOM | 5665 | CA  | ALA A 232 | -26.658 | 34.111 | -57.848 | 1.00 | 0.00 | B | C |
| ATOM | 5666 | CB  | ALA A 232 | -26.600 | 32.741 | -58.542 | 1.00 | 0.00 | B | C |
| ATOM | 5667 | C   | ALA A 232 | -26.233 | 33.912 | -56.421 | 1.00 | 0.00 | B | C |
| ATOM | 5668 | O   | ALA A 232 | -25.260 | 33.215 | -56.147 | 1.00 | 0.00 | B | O |
| ATOM | 5669 | N   | HSD A 233 | -26.931 | 34.619 | -55.507 | 1.00 | 0.00 | B | N |
| ATOM | 5670 | CA  | HSD A 233 | -26.763 | 34.721 | -54.077 | 1.00 | 0.00 | B | C |
| ATOM | 5671 | CB  | HSD A 233 | -27.099 | 36.130 | -53.557 | 1.00 | 0.00 | B | C |
| ATOM | 5672 | ND1 | HSD A 233 | -28.245 | 37.390 | -55.430 | 1.00 | 0.00 | B | N |
| ATOM | 5673 | CG  | HSD A 233 | -28.300 | 36.729 | -54.221 | 1.00 | 0.00 | B | C |
| ATOM | 5674 | CE1 | HSD A 233 | -29.510 | 37.785 | -55.717 | 1.00 | 0.00 | B | C |
| ATOM | 5675 | NE2 | HSD A 233 | -30.371 | 37.426 | -54.783 | 1.00 | 0.00 | B | N |
| ATOM | 5676 | CD2 | HSD A 233 | -29.605 | 36.763 | -53.842 | 1.00 | 0.00 | B | C |
| ATOM | 5677 | C   | HSD A 233 | -27.474 | 33.715 | -53.207 | 1.00 | 0.00 | B | C |
| ATOM | 5678 | O   | HSD A 233 | -27.187 | 33.652 | -52.012 | 1.00 | 0.00 | B | O |
| ATOM | 5679 | N   | GLY A 234 | -28.460 | 32.954 | -53.716 | 1.00 | 0.00 | B | N |
| ATOM | 5680 | CA  | GLY A 234 | -29.286 | 32.136 | -52.852 | 1.00 | 0.00 | B | C |

|      |      |     |           |         |        |         |      |      |   |   |
|------|------|-----|-----------|---------|--------|---------|------|------|---|---|
| ATOM | 5681 | C   | GLY A 234 | -28.479 | 31.113 | -52.105 | 1.00 | 0.00 | B | C |
| ATOM | 5682 | O   | GLY A 234 | -27.313 | 30.877 | -52.399 | 1.00 | 0.00 | B | O |
| ATOM | 5683 | N   | ASP A 235 | -29.127 | 30.449 | -51.121 | 1.00 | 0.00 | B | N |
| ATOM | 5684 | CA  | ASP A 235 | -28.501 | 29.492 | -50.246 | 1.00 | 0.00 | B | C |
| ATOM | 5685 | CB  | ASP A 235 | -29.450 | 28.925 | -49.173 | 1.00 | 0.00 | B | C |
| ATOM | 5686 | CG  | ASP A 235 | -29.611 | 29.995 | -48.097 | 1.00 | 0.00 | B | C |
| ATOM | 5687 | OD1 | ASP A 235 | -28.796 | 30.957 | -48.100 | 1.00 | 0.00 | B | O |
| ATOM | 5688 | OD2 | ASP A 235 | -30.543 | 29.865 | -47.259 | 1.00 | 0.00 | B | O |
| ATOM | 5689 | C   | ASP A 235 | -27.941 | 28.357 | -51.047 | 1.00 | 0.00 | B | C |
| ATOM | 5690 | O   | ASP A 235 | -26.999 | 27.691 | -50.622 | 1.00 | 0.00 | B | O |
| ATOM | 5691 | N   | PHE A 236 | -28.517 | 28.099 | -52.232 | 1.00 | 0.00 | B | N |
| ATOM | 5692 | CA  | PHE A 236 | -28.046 | 27.045 | -53.086 | 1.00 | 0.00 | B | C |
| ATOM | 5693 | CB  | PHE A 236 | -28.909 | 26.873 | -54.352 | 1.00 | 0.00 | B | C |
| ATOM | 5694 | CG  | PHE A 236 | -28.252 | 25.861 | -55.228 | 1.00 | 0.00 | B | C |
| ATOM | 5695 | CD1 | PHE A 236 | -28.374 | 24.517 | -54.966 | 1.00 | 0.00 | B | C |
| ATOM | 5696 | CE1 | PHE A 236 | -27.762 | 23.585 | -55.774 | 1.00 | 0.00 | B | C |
| ATOM | 5697 | CZ  | PHE A 236 | -27.016 | 23.995 | -56.852 | 1.00 | 0.00 | B | C |
| ATOM | 5698 | CD2 | PHE A 236 | -27.496 | 26.263 | -56.304 | 1.00 | 0.00 | B | C |
| ATOM | 5699 | CE2 | PHE A 236 | -26.883 | 25.338 | -57.116 | 1.00 | 0.00 | B | C |
| ATOM | 5700 | C   | PHE A 236 | -26.633 | 27.338 | -53.498 | 1.00 | 0.00 | B | C |
| ATOM | 5701 | O   | PHE A 236 | -25.858 | 26.430 | -53.780 | 1.00 | 0.00 | B | O |
| ATOM | 5702 | N   | PHE A 237 | -26.311 | 28.633 | -53.630 | 1.00 | 0.00 | B | N |
| ATOM | 5703 | CA  | PHE A 237 | -25.066 | 29.213 | -54.048 | 1.00 | 0.00 | B | C |
| ATOM | 5704 | CB  | PHE A 237 | -25.288 | 30.593 | -54.679 | 1.00 | 0.00 | B | C |
| ATOM | 5705 | CG  | PHE A 237 | -26.205 | 30.291 | -55.819 | 1.00 | 0.00 | B | C |
| ATOM | 5706 | CD1 | PHE A 237 | -25.730 | 29.679 | -56.957 | 1.00 | 0.00 | B | C |
| ATOM | 5707 | CE1 | PHE A 237 | -26.574 | 29.393 | -58.004 | 1.00 | 0.00 | B | C |
| ATOM | 5708 | CZ  | PHE A 237 | -27.907 | 29.717 | -57.927 | 1.00 | 0.00 | B | C |
| ATOM | 5709 | CD2 | PHE A 237 | -27.541 | 30.611 | -55.747 | 1.00 | 0.00 | B | C |
| ATOM | 5710 | CE2 | PHE A 237 | -28.389 | 30.327 | -56.794 | 1.00 | 0.00 | B | C |
| ATOM | 5711 | C   | PHE A 237 | -24.006 | 29.278 | -52.985 | 1.00 | 0.00 | B | C |
| ATOM | 5712 | O   | PHE A 237 | -22.873 | 29.623 | -53.312 | 1.00 | 0.00 | B | O |
| ATOM | 5713 | N   | LYS A 238 | -24.357 | 29.101 | -51.689 | 1.00 | 0.00 | B | N |
| ATOM | 5714 | CA  | LYS A 238 | -23.391 | 29.191 | -50.625 | 1.00 | 0.00 | B | C |
| ATOM | 5715 | CB  | LYS A 238 | -23.778 | 30.208 | -49.539 | 1.00 | 0.00 | B | C |
| ATOM | 5716 | CG  | LYS A 238 | -23.652 | 31.661 | -50.001 | 1.00 | 0.00 | B | C |
| ATOM | 5717 | CD  | LYS A 238 | -24.387 | 32.665 | -49.109 | 1.00 | 0.00 | B | C |
| ATOM | 5718 | CE  | LYS A 238 | -24.361 | 32.314 | -47.619 | 1.00 | 0.00 | B | C |

|      |      |     |     |   |     |         |        |         |      |      |   |   |
|------|------|-----|-----|---|-----|---------|--------|---------|------|------|---|---|
| ATOM | 5719 | NZ  | LYS | A | 238 | -25.350 | 31.253 | -47.327 | 1.00 | 0.00 | B | N |
| ATOM | 5720 | C   | LYS | A | 238 | -23.191 | 27.855 | -49.963 | 1.00 | 0.00 | B | C |
| ATOM | 5721 | O   | LYS | A | 238 | -23.755 | 26.840 | -50.373 | 1.00 | 0.00 | B | O |
| ATOM | 5722 | N   | LYS | A | 239 | -22.351 | 27.857 | -48.899 | 1.00 | 0.00 | B | N |
| ATOM | 5723 | CA  | LYS | A | 239 | -21.923 | 26.688 | -48.181 | 1.00 | 0.00 | B | C |
| ATOM | 5724 | CB  | LYS | A | 239 | -20.975 | 27.019 | -47.015 | 1.00 | 0.00 | B | C |
| ATOM | 5725 | CG  | LYS | A | 239 | -19.665 | 27.662 | -47.478 | 1.00 | 0.00 | B | C |
| ATOM | 5726 | CD  | LYS | A | 239 | -18.869 | 28.338 | -46.359 | 1.00 | 0.00 | B | C |
| ATOM | 5727 | CE  | LYS | A | 239 | -17.592 | 29.027 | -46.850 | 1.00 | 0.00 | B | C |
| ATOM | 5728 | NZ  | LYS | A | 239 | -16.941 | 29.753 | -45.736 | 1.00 | 0.00 | B | N |
| ATOM | 5729 | C   | LYS | A | 239 | -23.096 | 25.946 | -47.639 | 1.00 | 0.00 | B | C |
| ATOM | 5730 | O   | LYS | A | 239 | -24.052 | 26.514 | -47.113 | 1.00 | 0.00 | B | O |
| ATOM | 5731 | N   | THR | A | 240 | -22.988 | 24.609 | -47.745 | 1.00 | 0.00 | B | N |
| ATOM | 5732 | CA  | THR | A | 240 | -23.976 | 23.630 | -47.421 | 1.00 | 0.00 | B | C |
| ATOM | 5733 | CB  | THR | A | 240 | -23.452 | 22.268 | -47.790 | 1.00 | 0.00 | B | C |
| ATOM | 5734 | OG1 | THR | A | 240 | -24.485 | 21.302 | -47.861 | 1.00 | 0.00 | B | O |
| ATOM | 5735 | CG2 | THR | A | 240 | -22.388 | 21.858 | -46.760 | 1.00 | 0.00 | B | C |
| ATOM | 5736 | C   | THR | A | 240 | -24.282 | 23.700 | -45.953 | 1.00 | 0.00 | B | C |
| ATOM | 5737 | O   | THR | A | 240 | -23.394 | 23.812 | -45.112 | 1.00 | 0.00 | B | O |
| ATOM | 5738 | N   | LYS | A | 241 | -25.591 | 23.675 | -45.649 | 1.00 | 0.00 | B | N |
| ATOM | 5739 | CA  | LYS | A | 241 | -26.218 | 23.694 | -44.359 | 1.00 | 0.00 | B | C |
| ATOM | 5740 | CB  | LYS | A | 241 | -27.741 | 23.866 | -44.443 | 1.00 | 0.00 | B | C |
| ATOM | 5741 | CG  | LYS | A | 241 | -28.148 | 25.302 | -44.770 | 1.00 | 0.00 | B | C |
| ATOM | 5742 | CD  | LYS | A | 241 | -29.599 | 25.451 | -45.224 | 1.00 | 0.00 | B | C |
| ATOM | 5743 | CE  | LYS | A | 241 | -30.611 | 24.722 | -44.341 | 1.00 | 0.00 | B | C |
| ATOM | 5744 | NZ  | LYS | A | 241 | -30.579 | 23.265 | -44.600 | 1.00 | 0.00 | B | N |
| ATOM | 5745 | C   | LYS | A | 241 | -25.948 | 22.457 | -43.547 | 1.00 | 0.00 | B | C |
| ATOM | 5746 | O   | LYS | A | 241 | -25.792 | 22.578 | -42.332 | 1.00 | 0.00 | B | O |
| ATOM | 5747 | N   | GLY | A | 242 | -25.847 | 21.235 | -44.129 | 1.00 | 0.00 | B | N |
| ATOM | 5748 | CA  | GLY | A | 242 | -25.879 | 20.892 | -45.524 | 1.00 | 0.00 | B | C |
| ATOM | 5749 | C   | GLY | A | 242 | -27.212 | 21.127 | -46.161 | 1.00 | 0.00 | B | C |
| ATOM | 5750 | O   | GLY | A | 242 | -28.185 | 20.439 | -45.864 | 1.00 | 0.00 | B | O |
| ATOM | 5751 | N   | ARG | A | 243 | -27.291 | 22.149 | -47.042 | 1.00 | 0.00 | B | N |
| ATOM | 5752 | CA  | ARG | A | 243 | -28.474 | 22.371 | -47.807 | 1.00 | 0.00 | B | C |
| ATOM | 5753 | CB  | ARG | A | 243 | -28.622 | 23.804 | -48.341 | 1.00 | 0.00 | B | C |
| ATOM | 5754 | CG  | ARG | A | 243 | -29.952 | 24.010 | -49.064 | 1.00 | 0.00 | B | C |
| ATOM | 5755 | CD  | ARG | A | 243 | -30.557 | 25.404 | -48.893 | 1.00 | 0.00 | B | C |
| ATOM | 5756 | NE  | ARG | A | 243 | -31.241 | 25.411 | -47.572 | 1.00 | 0.00 | B | N |

|      |      |     |           |         |        |         |      |      |   |   |
|------|------|-----|-----------|---------|--------|---------|------|------|---|---|
| ATOM | 5757 | CZ  | ARG A 243 | -32.153 | 26.378 | -47.266 | 1.00 | 0.00 | B | C |
| ATOM | 5758 | NH1 | ARG A 243 | -32.460 | 27.351 | -48.175 | 1.00 | 0.00 | B | N |
| ATOM | 5759 | NH2 | ARG A 243 | -32.759 | 26.370 | -46.043 | 1.00 | 0.00 | B | N |
| ATOM | 5760 | C   | ARG A 243 | -28.562 | 21.396 | -48.939 | 1.00 | 0.00 | B | C |
| ATOM | 5761 | O   | ARG A 243 | -29.586 | 20.720 | -49.042 | 1.00 | 0.00 | B | O |
| ATOM | 5762 | N   | PRO A 244 | -27.580 | 21.211 | -49.809 | 1.00 | 0.00 | B | N |
| ATOM | 5763 | CD  | PRO A 244 | -27.410 | 19.849 | -50.287 | 1.00 | 0.00 | B | C |
| ATOM | 5764 | CA  | PRO A 244 | -26.326 | 21.956 | -49.888 | 1.00 | 0.00 | B | C |
| ATOM | 5765 | CB  | PRO A 244 | -25.347 | 21.026 | -50.609 | 1.00 | 0.00 | B | C |
| ATOM | 5766 | CG  | PRO A 244 | -25.903 | 19.619 | -50.401 | 1.00 | 0.00 | B | C |
| ATOM | 5767 | C   | PRO A 244 | -26.473 | 23.295 | -50.578 | 1.00 | 0.00 | B | C |
| ATOM | 5768 | O   | PRO A 244 | -27.591 | 23.627 | -50.961 | 1.00 | 0.00 | B | O |
| ATOM | 5769 | N   | GLY A 245 | -25.373 | 24.072 | -50.795 | 1.00 | 0.00 | B | N |
| ATOM | 5770 | CA  | GLY A 245 | -24.179 | 23.646 | -51.496 | 1.00 | 0.00 | B | C |
| ATOM | 5771 | C   | GLY A 245 | -24.507 | 23.698 | -52.960 | 1.00 | 0.00 | B | C |
| ATOM | 5772 | O   | GLY A 245 | -25.532 | 23.152 | -53.371 | 1.00 | 0.00 | B | O |
| ATOM | 5773 | N   | PHE A 246 | -23.629 | 24.262 | -53.834 | 1.00 | 0.00 | B | N |
| ATOM | 5774 | CA  | PHE A 246 | -22.247 | 24.613 | -53.603 | 1.00 | 0.00 | B | C |
| ATOM | 5775 | CB  | PHE A 246 | -21.347 | 23.595 | -54.334 | 1.00 | 0.00 | B | C |
| ATOM | 5776 | CG  | PHE A 246 | -19.999 | 24.138 | -54.658 | 1.00 | 0.00 | B | C |
| ATOM | 5777 | CD1 | PHE A 246 | -18.971 | 24.181 | -53.744 | 1.00 | 0.00 | B | C |
| ATOM | 5778 | CE1 | PHE A 246 | -17.743 | 24.684 | -54.111 | 1.00 | 0.00 | B | C |
| ATOM | 5779 | CZ  | PHE A 246 | -17.530 | 25.142 | -55.391 | 1.00 | 0.00 | B | C |
| ATOM | 5780 | CD2 | PHE A 246 | -19.774 | 24.588 | -55.939 | 1.00 | 0.00 | B | C |
| ATOM | 5781 | CE2 | PHE A 246 | -18.550 | 25.092 | -56.311 | 1.00 | 0.00 | B | C |
| ATOM | 5782 | C   | PHE A 246 | -21.908 | 26.009 | -54.059 | 1.00 | 0.00 | B | C |
| ATOM | 5783 | O   | PHE A 246 | -22.556 | 26.571 | -54.942 | 1.00 | 0.00 | B | O |
| ATOM | 5784 | N   | TYR A 247 | -20.819 | 26.573 | -53.472 | 1.00 | 0.00 | B | N |
| ATOM | 5785 | CA  | TYR A 247 | -20.470 | 27.965 | -53.617 | 1.00 | 0.00 | B | C |
| ATOM | 5786 | CB  | TYR A 247 | -20.320 | 28.593 | -52.222 | 1.00 | 0.00 | B | C |
| ATOM | 5787 | CG  | TYR A 247 | -19.588 | 29.880 | -52.291 | 1.00 | 0.00 | B | C |
| ATOM | 5788 | CD1 | TYR A 247 | -20.231 | 31.071 | -52.536 | 1.00 | 0.00 | B | C |
| ATOM | 5789 | CE1 | TYR A 247 | -19.505 | 32.240 | -52.581 | 1.00 | 0.00 | B | C |
| ATOM | 5790 | CZ  | TYR A 247 | -18.143 | 32.215 | -52.379 | 1.00 | 0.00 | B | C |
| ATOM | 5791 | OH  | TYR A 247 | -17.392 | 33.404 | -52.419 | 1.00 | 0.00 | B | O |
| ATOM | 5792 | CD2 | TYR A 247 | -18.232 | 29.867 | -52.092 | 1.00 | 0.00 | B | C |
| ATOM | 5793 | CE2 | TYR A 247 | -17.504 | 31.026 | -52.134 | 1.00 | 0.00 | B | C |
| ATOM | 5794 | C   | TYR A 247 | -19.208 | 28.197 | -54.411 | 1.00 | 0.00 | B | C |

ATOM 5795 O TYR A 247 -18.104 27.857 -53.999 1.00 0.00 B O  
ATOM 5796 N PHE A 248 -19.403 28.686 -55.650 1.00 0.00 B N  
ATOM 5797 CA PHE A 248 -18.492 29.149 -56.670 1.00 0.00 B C  
ATOM 5798 CB PHE A 248 -18.892 28.668 -58.066 1.00 0.00 B C  
ATOM 5799 CG PHE A 248 -20.294 29.085 -58.302 1.00 0.00 B C  
ATOM 5800 CD1 PHE A 248 -21.325 28.296 -57.852 1.00 0.00 B C  
ATOM 5801 CE1 PHE A 248 -22.630 28.671 -58.068 1.00 0.00 B C  
ATOM 5802 CZ PHE A 248 -22.903 29.842 -58.734 1.00 0.00 B C  
ATOM 5803 CD2 PHE A 248 -20.573 30.260 -58.960 1.00 0.00 B C  
ATOM 5804 CE2 PHE A 248 -21.876 30.637 -59.181 1.00 0.00 B C  
ATOM 5805 C PHE A 248 -18.322 30.628 -56.659 1.00 0.00 B C  
ATOM 5806 O PHE A 248 -17.740 31.213 -57.571 1.00 0.00 B O  
ATOM 5807 N GLY A 249 -19.127 31.240 -55.802 1.00 0.00 B N  
ATOM 5808 CA GLY A 249 -19.279 32.606 -55.493 1.00 0.00 B C  
ATOM 5809 C GLY A 249 -19.975 33.335 -56.594 1.00 0.00 B C  
ATOM 5810 O GLY A 249 -19.307 33.946 -57.420 1.00 0.00 B O  
ATOM 5811 N GLU A 250 -21.291 33.107 -56.740 1.00 0.00 B N  
ATOM 5812 CA GLU A 250 -22.294 33.993 -57.288 1.00 0.00 B C  
ATOM 5813 CB GLU A 250 -22.537 35.172 -56.335 1.00 0.00 B C  
ATOM 5814 CG GLU A 250 -22.968 34.716 -54.940 1.00 0.00 B C  
ATOM 5815 CD GLU A 250 -23.184 35.948 -54.075 1.00 0.00 B C  
ATOM 5816 OE1 GLU A 250 -23.162 37.075 -54.640 1.00 0.00 B O  
ATOM 5817 OE2 GLU A 250 -23.383 35.781 -52.844 1.00 0.00 B O  
ATOM 5818 C GLU A 250 -22.165 34.581 -58.675 1.00 0.00 B C  
ATOM 5819 O GLU A 250 -23.198 34.858 -59.289 1.00 0.00 B O  
ATOM 5820 N LEU A 251 -20.966 34.721 -59.266 1.00 0.00 B N  
ATOM 5821 CA LEU A 251 -20.860 35.449 -60.513 1.00 0.00 B C  
ATOM 5822 CB LEU A 251 -19.750 36.519 -60.506 1.00 0.00 B C  
ATOM 5823 CG LEU A 251 -19.970 37.711 -59.558 1.00 0.00 B C  
ATOM 5824 CD1 LEU A 251 -18.775 38.674 -59.617 1.00 0.00 B C  
ATOM 5825 CD2 LEU A 251 -21.293 38.438 -59.849 1.00 0.00 B C  
ATOM 5826 C LEU A 251 -20.457 34.483 -61.575 1.00 0.00 B C  
ATOM 5827 O LEU A 251 -19.620 33.618 -61.334 1.00 0.00 B O  
ATOM 5828 N PRO A 252 -20.980 34.660 -62.762 1.00 0.00 B N  
ATOM 5829 CD PRO A 252 -22.096 35.561 -62.992 1.00 0.00 B C  
ATOM 5830 CA PRO A 252 -20.762 33.760 -63.859 1.00 0.00 B C  
ATOM 5831 CB PRO A 252 -21.515 34.369 -65.040 1.00 0.00 B C  
ATOM 5832 CG PRO A 252 -22.659 35.157 -64.367 1.00 0.00 B C

|      |      |     |           |         |        |         |      |      |   |   |
|------|------|-----|-----------|---------|--------|---------|------|------|---|---|
| ATOM | 5833 | C   | PRO A 252 | -19.318 | 33.449 | -64.112 | 1.00 | 0.00 | B | C |
| ATOM | 5834 | O   | PRO A 252 | -19.000 | 32.279 | -64.304 | 1.00 | 0.00 | B | O |
| ATOM | 5835 | N   | LEU A 253 | -18.425 | 34.452 | -64.095 | 1.00 | 0.00 | B | N |
| ATOM | 5836 | CA  | LEU A 253 | -17.031 | 34.184 | -64.315 | 1.00 | 0.00 | B | C |
| ATOM | 5837 | CB  | LEU A 253 | -16.158 | 35.449 | -64.257 | 1.00 | 0.00 | B | C |
| ATOM | 5838 | CG  | LEU A 253 | -14.659 | 35.175 | -64.495 | 1.00 | 0.00 | B | C |
| ATOM | 5839 | CD1 | LEU A 253 | -14.363 | 34.783 | -65.948 | 1.00 | 0.00 | B | C |
| ATOM | 5840 | CD2 | LEU A 253 | -13.795 | 36.345 | -64.017 | 1.00 | 0.00 | B | C |
| ATOM | 5841 | C   | LEU A 253 | -16.546 | 33.283 | -63.217 | 1.00 | 0.00 | B | C |
| ATOM | 5842 | O   | LEU A 253 | -15.827 | 32.316 | -63.468 | 1.00 | 0.00 | B | O |
| ATOM | 5843 | N   | SER A 254 | -16.949 | 33.568 | -61.964 | 1.00 | 0.00 | B | N |
| ATOM | 5844 | CA  | SER A 254 | -16.482 | 32.818 | -60.830 | 1.00 | 0.00 | B | C |
| ATOM | 5845 | CB  | SER A 254 | -17.051 | 33.348 | -59.505 | 1.00 | 0.00 | B | C |
| ATOM | 5846 | OG  | SER A 254 | -16.589 | 34.673 | -59.286 | 1.00 | 0.00 | B | O |
| ATOM | 5847 | C   | SER A 254 | -16.917 | 31.396 | -60.982 | 1.00 | 0.00 | B | C |
| ATOM | 5848 | O   | SER A 254 | -16.141 | 30.469 | -60.757 | 1.00 | 0.00 | B | O |
| ATOM | 5849 | N   | LEU A 255 | -18.182 | 31.199 | -61.385 | 1.00 | 0.00 | B | N |
| ATOM | 5850 | CA  | LEU A 255 | -18.728 | 29.889 | -61.578 | 1.00 | 0.00 | B | C |
| ATOM | 5851 | CB  | LEU A 255 | -20.197 | 29.947 | -62.048 | 1.00 | 0.00 | B | C |
| ATOM | 5852 | CG  | LEU A 255 | -20.847 | 28.568 | -62.277 | 1.00 | 0.00 | B | C |
| ATOM | 5853 | CD1 | LEU A 255 | -20.913 | 27.762 | -60.974 | 1.00 | 0.00 | B | C |
| ATOM | 5854 | CD2 | LEU A 255 | -22.227 | 28.696 | -62.949 | 1.00 | 0.00 | B | C |
| ATOM | 5855 | C   | LEU A 255 | -17.942 | 29.192 | -62.643 | 1.00 | 0.00 | B | C |
| ATOM | 5856 | O   | LEU A 255 | -17.502 | 28.057 | -62.469 | 1.00 | 0.00 | B | O |
| ATOM | 5857 | N   | ALA A 256 | -17.685 | 29.890 | -63.764 | 1.00 | 0.00 | B | N |
| ATOM | 5858 | CA  | ALA A 256 | -17.047 | 29.268 | -64.894 | 1.00 | 0.00 | B | C |
| ATOM | 5859 | CB  | ALA A 256 | -16.865 | 30.227 | -66.082 | 1.00 | 0.00 | B | C |
| ATOM | 5860 | C   | ALA A 256 | -15.690 | 28.776 | -64.491 | 1.00 | 0.00 | B | C |
| ATOM | 5861 | O   | ALA A 256 | -15.247 | 27.725 | -64.954 | 1.00 | 0.00 | B | O |
| ATOM | 5862 | N   | ALA A 257 | -14.963 | 29.567 | -63.679 | 1.00 | 0.00 | B | N |
| ATOM | 5863 | CA  | ALA A 257 | -13.648 | 29.183 | -63.242 | 1.00 | 0.00 | B | C |
| ATOM | 5864 | CB  | ALA A 257 | -12.906 | 30.351 | -62.564 | 1.00 | 0.00 | B | C |
| ATOM | 5865 | C   | ALA A 257 | -13.680 | 28.029 | -62.272 | 1.00 | 0.00 | B | C |
| ATOM | 5866 | O   | ALA A 257 | -12.974 | 27.037 | -62.458 | 1.00 | 0.00 | B | O |
| ATOM | 5867 | N   | CYS A 258 | -14.555 | 28.099 | -61.244 | 1.00 | 0.00 | B | N |
| ATOM | 5868 | CA  | CYS A 258 | -14.599 | 27.139 | -60.170 | 1.00 | 0.00 | B | C |
| ATOM | 5869 | CB  | CYS A 258 | -15.634 | 27.486 | -59.083 | 1.00 | 0.00 | B | C |
| ATOM | 5870 | SG  | CYS A 258 | -15.149 | 28.926 | -58.083 | 1.00 | 0.00 | B | S |

|      |      |     |           |         |        |         |      |      |   |   |
|------|------|-----|-----------|---------|--------|---------|------|------|---|---|
| ATOM | 5871 | C   | CYS A 258 | -14.948 | 25.790 | -60.705 | 1.00 | 0.00 | B | C |
| ATOM | 5872 | O   | CYS A 258 | -14.581 | 24.766 | -60.133 | 1.00 | 0.00 | B | O |
| ATOM | 5873 | N   | THR A 259 | -15.750 | 25.772 | -61.776 | 1.00 | 0.00 | B | N |
| ATOM | 5874 | CA  | THR A 259 | -16.184 | 24.610 | -62.497 | 1.00 | 0.00 | B | C |
| ATOM | 5875 | CB  | THR A 259 | -17.418 | 24.849 | -63.319 | 1.00 | 0.00 | B | C |
| ATOM | 5876 | OG1 | THR A 259 | -17.179 | 25.844 | -64.300 | 1.00 | 0.00 | B | O |
| ATOM | 5877 | CG2 | THR A 259 | -18.552 | 25.288 | -62.377 | 1.00 | 0.00 | B | C |
| ATOM | 5878 | C   | THR A 259 | -15.096 | 24.113 | -63.397 | 1.00 | 0.00 | B | C |
| ATOM | 5879 | O   | THR A 259 | -15.247 | 23.072 | -64.035 | 1.00 | 0.00 | B | O |
| ATOM | 5880 | N   | ASN A 260 | -14.000 | 24.884 | -63.541 | 1.00 | 0.00 | B | N |
| ATOM | 5881 | CA  | ASN A 260 | -12.908 | 24.522 | -64.394 | 1.00 | 0.00 | B | C |
| ATOM | 5882 | CB  | ASN A 260 | -12.231 | 23.196 | -63.990 | 1.00 | 0.00 | B | C |
| ATOM | 5883 | CG  | ASN A 260 | -10.832 | 23.203 | -64.586 | 1.00 | 0.00 | B | C |
| ATOM | 5884 | OD1 | ASN A 260 | -10.168 | 24.238 | -64.601 | 1.00 | 0.00 | B | O |
| ATOM | 5885 | ND2 | ASN A 260 | -10.377 | 22.028 | -65.095 | 1.00 | 0.00 | B | N |
| ATOM | 5886 | C   | ASN A 260 | -13.356 | 24.449 | -65.821 | 1.00 | 0.00 | B | C |
| ATOM | 5887 | O   | ASN A 260 | -13.218 | 23.427 | -66.493 | 1.00 | 0.00 | B | O |
| ATOM | 5888 | N   | GLN A 261 | -13.968 | 25.542 | -66.315 | 1.00 | 0.00 | B | N |
| ATOM | 5889 | CA  | GLN A 261 | -14.297 | 25.571 | -67.709 | 1.00 | 0.00 | B | C |
| ATOM | 5890 | CB  | GLN A 261 | -15.793 | 25.333 | -67.991 | 1.00 | 0.00 | B | C |
| ATOM | 5891 | CG  | GLN A 261 | -16.772 | 26.221 | -67.231 | 1.00 | 0.00 | B | C |
| ATOM | 5892 | CD  | GLN A 261 | -18.135 | 25.551 | -67.367 | 1.00 | 0.00 | B | C |
| ATOM | 5893 | OE1 | GLN A 261 | -18.437 | 24.938 | -68.389 | 1.00 | 0.00 | B | O |
| ATOM | 5894 | NE2 | GLN A 261 | -18.980 | 25.661 | -66.308 | 1.00 | 0.00 | B | N |
| ATOM | 5895 | C   | GLN A 261 | -13.735 | 26.829 | -68.299 | 1.00 | 0.00 | B | C |
| ATOM | 5896 | O   | GLN A 261 | -14.370 | 27.881 | -68.353 | 1.00 | 0.00 | B | O |
| ATOM | 5897 | N   | LEU A 262 | -12.487 | 26.701 | -68.799 | 1.00 | 0.00 | B | N |
| ATOM | 5898 | CA  | LEU A 262 | -11.696 | 27.810 | -69.245 | 1.00 | 0.00 | B | C |
| ATOM | 5899 | CB  | LEU A 262 | -10.250 | 27.441 | -69.597 | 1.00 | 0.00 | B | C |
| ATOM | 5900 | CG  | LEU A 262 | -9.448  | 28.669 | -70.058 | 1.00 | 0.00 | B | C |
| ATOM | 5901 | CD1 | LEU A 262 | -9.307  | 29.701 | -68.927 | 1.00 | 0.00 | B | C |
| ATOM | 5902 | CD2 | LEU A 262 | -8.102  | 28.263 | -70.668 | 1.00 | 0.00 | B | C |
| ATOM | 5903 | C   | LEU A 262 | -12.273 | 28.504 | -70.433 | 1.00 | 0.00 | B | C |
| ATOM | 5904 | O   | LEU A 262 | -12.272 | 29.733 | -70.477 | 1.00 | 0.00 | B | O |
| ATOM | 5905 | N   | GLY A 263 | -12.804 | 27.757 | -71.420 | 1.00 | 0.00 | B | N |
| ATOM | 5906 | CA  | GLY A 263 | -13.238 | 28.386 | -72.636 | 1.00 | 0.00 | B | C |
| ATOM | 5907 | C   | GLY A 263 | -14.278 | 29.412 | -72.321 | 1.00 | 0.00 | B | C |
| ATOM | 5908 | O   | GLY A 263 | -14.279 | 30.502 | -72.892 | 1.00 | 0.00 | B | O |



ATOM 5909 N ILE A 264 -15.207 29.078 -71.411 1.00 0.00 B N  
ATOM 5910 CA ILE A 264 -16.247 29.989 -71.032 1.00 0.00 B C  
ATOM 5911 CB ILE A 264 -17.344 29.351 -70.225 1.00 0.00 B C  
ATOM 5912 CG2 ILE A 264 -18.313 30.459 -69.780 1.00 0.00 B C  
ATOM 5913 CG1 ILE A 264 -18.028 28.256 -71.062 1.00 0.00 B C  
ATOM 5914 CD ILE A 264 -19.099 27.476 -70.301 1.00 0.00 B C  
ATOM 5915 C ILE A 264 -15.659 31.143 -70.278 1.00 0.00 B C  
ATOM 5916 O ILE A 264 -16.129 32.273 -70.400 1.00 0.00 B O  
ATOM 5917 N VAL A 265 -14.625 30.894 -69.444 1.00 0.00 B N  
ATOM 5918 CA VAL A 265 -14.025 31.991 -68.740 1.00 0.00 B C  
ATOM 5919 CB VAL A 265 -12.834 31.586 -67.909 1.00 0.00 B C  
ATOM 5920 CG1 VAL A 265 -12.133 32.852 -67.386 1.00 0.00 B C  
ATOM 5921 CG2 VAL A 265 -13.315 30.660 -66.781 1.00 0.00 B C  
ATOM 5922 C VAL A 265 -13.541 32.972 -69.765 1.00 0.00 B C  
ATOM 5923 O VAL A 265 -13.765 34.175 -69.633 1.00 0.00 B O  
ATOM 5924 N LYS A 266 -12.878 32.477 -70.829 1.00 0.00 B N  
ATOM 5925 CA LYS A 266 -12.364 33.359 -71.841 1.00 0.00 B C  
ATOM 5926 CB LYS A 266 -11.550 32.626 -72.925 1.00 0.00 B C  
ATOM 5927 CG LYS A 266 -10.197 32.107 -72.428 1.00 0.00 B C  
ATOM 5928 CD LYS A 266 -9.480 31.179 -73.411 1.00 0.00 B C  
ATOM 5929 CE LYS A 266 -8.081 30.755 -72.949 1.00 0.00 B C  
ATOM 5930 NZ LYS A 266 -7.444 29.893 -73.971 1.00 0.00 B N  
ATOM 5931 C LYS A 266 -13.495 34.072 -72.516 1.00 0.00 B C  
ATOM 5932 O LYS A 266 -13.466 35.289 -72.696 1.00 0.00 B O  
ATOM 5933 N PHE A 267 -14.560 33.332 -72.857 1.00 0.00 B N  
ATOM 5934 CA PHE A 267 -15.685 33.871 -73.564 1.00 0.00 B C  
ATOM 5935 CB PHE A 267 -16.762 32.787 -73.788 1.00 0.00 B C  
ATOM 5936 CG PHE A 267 -17.954 33.363 -74.471 1.00 0.00 B C  
ATOM 5937 CD1 PHE A 267 -18.970 33.928 -73.733 1.00 0.00 B C  
ATOM 5938 CE1 PHE A 267 -20.078 34.456 -74.352 1.00 0.00 B C  
ATOM 5939 CZ PHE A 267 -20.181 34.423 -75.721 1.00 0.00 B C  
ATOM 5940 CD2 PHE A 267 -18.068 33.327 -75.842 1.00 0.00 B C  
ATOM 5941 CE2 PHE A 267 -19.174 33.858 -76.466 1.00 0.00 B C  
ATOM 5942 C PHE A 267 -16.281 34.975 -72.748 1.00 0.00 B C  
ATOM 5943 O PHE A 267 -16.698 35.997 -73.291 1.00 0.00 B O  
ATOM 5944 N LEU A 268 -16.365 34.794 -71.417 1.00 0.00 B N  
ATOM 5945 CA LEU A 268 -16.983 35.820 -70.625 1.00 0.00 B C  
ATOM 5946 CB LEU A 268 -17.114 35.440 -69.138 1.00 0.00 B C

|      |      |     |           |         |        |         |      |      |   |   |
|------|------|-----|-----------|---------|--------|---------|------|------|---|---|
| ATOM | 5947 | CG  | LEU A 268 | -18.092 | 34.282 | -68.864 | 1.00 | 0.00 | B | C |
| ATOM | 5948 | CD1 | LEU A 268 | -18.168 | 33.964 | -67.362 | 1.00 | 0.00 | B | C |
| ATOM | 5949 | CD2 | LEU A 268 | -19.478 | 34.555 | -69.472 | 1.00 | 0.00 | B | C |
| ATOM | 5950 | C   | LEU A 268 | -16.184 | 37.090 | -70.697 | 1.00 | 0.00 | B | C |
| ATOM | 5951 | O   | LEU A 268 | -16.732 | 38.165 | -70.921 | 1.00 | 0.00 | B | O |
| ATOM | 5952 | N   | LEU A 269 | -14.858 | 36.992 | -70.499 | 1.00 | 0.00 | B | N |
| ATOM | 5953 | CA  | LEU A 269 | -14.004 | 38.146 | -70.469 | 1.00 | 0.00 | B | C |
| ATOM | 5954 | CB  | LEU A 269 | -12.598 | 37.806 | -69.951 | 1.00 | 0.00 | B | C |
| ATOM | 5955 | CG  | LEU A 269 | -12.564 | 37.365 | -68.473 | 1.00 | 0.00 | B | C |
| ATOM | 5956 | CD1 | LEU A 269 | -11.131 | 37.041 | -68.029 | 1.00 | 0.00 | B | C |
| ATOM | 5957 | CD2 | LEU A 269 | -13.232 | 38.401 | -67.554 | 1.00 | 0.00 | B | C |
| ATOM | 5958 | C   | LEU A 269 | -13.842 | 38.794 | -71.821 | 1.00 | 0.00 | B | C |
| ATOM | 5959 | O   | LEU A 269 | -13.770 | 40.018 | -71.919 | 1.00 | 0.00 | B | O |
| ATOM | 5960 | N   | GLN A 270 | -13.679 | 37.977 | -72.880 | 1.00 | 0.00 | B | N |
| ATOM | 5961 | CA  | GLN A 270 | -13.405 | 38.412 | -74.228 | 1.00 | 0.00 | B | C |
| ATOM | 5962 | CB  | GLN A 270 | -12.644 | 37.348 | -75.031 | 1.00 | 0.00 | B | C |
| ATOM | 5963 | CG  | GLN A 270 | -11.237 | 37.131 | -74.469 | 1.00 | 0.00 | B | C |
| ATOM | 5964 | CD  | GLN A 270 | -10.536 | 36.069 | -75.298 | 1.00 | 0.00 | B | C |
| ATOM | 5965 | OE1 | GLN A 270 | -11.064 | 35.598 | -76.304 | 1.00 | 0.00 | B | O |
| ATOM | 5966 | NE2 | GLN A 270 | -9.310  | 35.683 | -74.861 | 1.00 | 0.00 | B | N |
| ATOM | 5967 | C   | GLN A 270 | -14.564 | 38.915 | -75.060 | 1.00 | 0.00 | B | C |
| ATOM | 5968 | O   | GLN A 270 | -14.374 | 39.810 | -75.882 | 1.00 | 0.00 | B | O |
| ATOM | 5969 | N   | ASN A 271 | -15.789 | 38.371 | -74.889 | 1.00 | 0.00 | B | N |
| ATOM | 5970 | CA  | ASN A 271 | -16.871 | 38.608 | -75.823 | 1.00 | 0.00 | B | C |
| ATOM | 5971 | CB  | ASN A 271 | -18.200 | 37.901 | -75.482 | 1.00 | 0.00 | B | C |
| ATOM | 5972 | CG  | ASN A 271 | -18.810 | 38.533 | -74.241 | 1.00 | 0.00 | B | C |
| ATOM | 5973 | OD1 | ASN A 271 | -19.702 | 39.373 | -74.343 | 1.00 | 0.00 | B | O |
| ATOM | 5974 | ND2 | ASN A 271 | -18.333 | 38.117 | -73.041 | 1.00 | 0.00 | B | N |
| ATOM | 5975 | C   | ASN A 271 | -17.169 | 40.062 | -76.050 | 1.00 | 0.00 | B | C |
| ATOM | 5976 | O   | ASN A 271 | -16.856 | 40.935 | -75.243 | 1.00 | 0.00 | B | O |
| ATOM | 5977 | N   | SER A 272 | -17.753 | 40.338 | -77.240 | 1.00 | 0.00 | B | N |
| ATOM | 5978 | CA  | SER A 272 | -18.099 | 41.645 | -77.725 | 1.00 | 0.00 | B | C |
| ATOM | 5979 | CB  | SER A 272 | -18.511 | 41.622 | -79.204 | 1.00 | 0.00 | B | C |
| ATOM | 5980 | OG  | SER A 272 | -17.428 | 41.176 | -80.006 | 1.00 | 0.00 | B | O |
| ATOM | 5981 | C   | SER A 272 | -19.260 | 42.230 | -76.976 | 1.00 | 0.00 | B | C |
| ATOM | 5982 | O   | SER A 272 | -19.305 | 43.440 | -76.749 | 1.00 | 0.00 | B | O |
| ATOM | 5983 | N   | TRP A 273 | -20.249 | 41.393 | -76.618 | 1.00 | 0.00 | B | N |
| ATOM | 5984 | CA  | TRP A 273 | -21.470 | 41.884 | -76.035 | 1.00 | 0.00 | B | C |

|      |      |     |     |   |     |         |        |         |      |      |   |   |
|------|------|-----|-----|---|-----|---------|--------|---------|------|------|---|---|
| ATOM | 5985 | CB  | TRP | A | 273 | -22.551 | 40.802 | -75.951 | 1.00 | 0.00 | B | C |
| ATOM | 5986 | CG  | TRP | A | 273 | -23.008 | 40.389 | -77.328 | 1.00 | 0.00 | B | C |
| ATOM | 5987 | CD1 | TRP | A | 273 | -22.514 | 39.408 | -78.138 | 1.00 | 0.00 | B | C |
| ATOM | 5988 | NE1 | TRP | A | 273 | -23.200 | 39.399 | -79.328 | 1.00 | 0.00 | B | N |
| ATOM | 5989 | CE2 | TRP | A | 273 | -24.161 | 40.389 | -79.292 | 1.00 | 0.00 | B | C |
| ATOM | 5990 | CD2 | TRP | A | 273 | -24.065 | 41.024 | -78.054 | 1.00 | 0.00 | B | C |
| ATOM | 5991 | CE3 | TRP | A | 273 | -24.897 | 42.060 | -77.720 | 1.00 | 0.00 | B | C |
| ATOM | 5992 | CZ3 | TRP | A | 273 | -25.829 | 42.448 | -78.655 | 1.00 | 0.00 | B | C |
| ATOM | 5993 | CZ2 | TRP | A | 273 | -25.087 | 40.774 | -80.216 | 1.00 | 0.00 | B | C |
| ATOM | 5994 | CH2 | TRP | A | 273 | -25.922 | 41.817 | -79.880 | 1.00 | 0.00 | B | C |
| ATOM | 5995 | C   | TRP | A | 273 | -21.271 | 42.480 | -74.680 | 1.00 | 0.00 | B | C |
| ATOM | 5996 | O   | TRP | A | 273 | -21.646 | 43.629 | -74.450 | 1.00 | 0.00 | B | O |
| ATOM | 5997 | N   | GLN | A | 274 | -20.695 | 41.722 | -73.729 | 1.00 | 0.00 | B | N |
| ATOM | 5998 | CA  | GLN | A | 274 | -20.460 | 42.306 | -72.441 | 1.00 | 0.00 | B | C |
| ATOM | 5999 | CB  | GLN | A | 274 | -21.672 | 42.206 | -71.497 | 1.00 | 0.00 | B | C |
| ATOM | 6000 | CG  | GLN | A | 274 | -21.470 | 42.901 | -70.147 | 1.00 | 0.00 | B | C |
| ATOM | 6001 | CD  | GLN | A | 274 | -22.791 | 42.863 | -69.390 | 1.00 | 0.00 | B | C |
| ATOM | 6002 | OE1 | GLN | A | 274 | -23.787 | 42.321 | -69.868 | 1.00 | 0.00 | B | O |
| ATOM | 6003 | NE2 | GLN | A | 274 | -22.807 | 43.467 | -68.171 | 1.00 | 0.00 | B | N |
| ATOM | 6004 | C   | GLN | A | 274 | -19.317 | 41.564 | -71.832 | 1.00 | 0.00 | B | C |
| ATOM | 6005 | O   | GLN | A | 274 | -19.431 | 40.382 | -71.509 | 1.00 | 0.00 | B | O |
| ATOM | 6006 | N   | THR | A | 275 | -18.179 | 42.254 | -71.649 | 1.00 | 0.00 | B | N |
| ATOM | 6007 | CA  | THR | A | 275 | -17.033 | 41.605 | -71.090 | 1.00 | 0.00 | B | C |
| ATOM | 6008 | CB  | THR | A | 275 | -15.756 | 42.356 | -71.317 | 1.00 | 0.00 | B | C |
| ATOM | 6009 | OG1 | THR | A | 275 | -15.824 | 43.634 | -70.698 | 1.00 | 0.00 | B | O |
| ATOM | 6010 | CG2 | THR | A | 275 | -15.539 | 42.514 | -72.832 | 1.00 | 0.00 | B | C |
| ATOM | 6011 | C   | THR | A | 275 | -17.254 | 41.536 | -69.618 | 1.00 | 0.00 | B | C |
| ATOM | 6012 | O   | THR | A | 275 | -17.825 | 42.452 | -69.026 | 1.00 | 0.00 | B | O |
| ATOM | 6013 | N   | ALA | A | 276 | -16.812 | 40.432 | -68.989 | 1.00 | 0.00 | B | N |
| ATOM | 6014 | CA  | ALA | A | 276 | -16.997 | 40.298 | -67.578 | 1.00 | 0.00 | B | C |
| ATOM | 6015 | CB  | ALA | A | 276 | -16.759 | 38.866 | -67.059 | 1.00 | 0.00 | B | C |
| ATOM | 6016 | C   | ALA | A | 276 | -16.034 | 41.205 | -66.881 | 1.00 | 0.00 | B | C |
| ATOM | 6017 | O   | ALA | A | 276 | -14.942 | 41.474 | -67.377 | 1.00 | 0.00 | B | O |
| ATOM | 6018 | N   | ASP | A | 277 | -16.450 | 41.722 | -65.706 | 1.00 | 0.00 | B | N |
| ATOM | 6019 | CA  | ASP | A | 277 | -15.586 | 42.530 | -64.899 | 1.00 | 0.00 | B | C |
| ATOM | 6020 | CB  | ASP | A | 277 | -16.343 | 43.375 | -63.852 | 1.00 | 0.00 | B | C |
| ATOM | 6021 | CG  | ASP | A | 277 | -15.359 | 44.218 | -63.045 | 1.00 | 0.00 | B | C |
| ATOM | 6022 | OD1 | ASP | A | 277 | -14.122 | 44.027 | -63.194 | 1.00 | 0.00 | B | O |

ATOM 6023 OD2 ASP A 277 -15.845 45.072 -62.255 1.00 0.00 B O  
ATOM 6024 C ASP A 277 -14.750 41.540 -64.152 1.00 0.00 B C  
ATOM 6025 O ASP A 277 -15.234 40.836 -63.270 1.00 0.00 B O  
ATOM 6026 N ILE A 278 -13.455 41.480 -64.495 1.00 0.00 B N  
ATOM 6027 CA ILE A 278 -12.550 40.520 -63.937 1.00 0.00 B C  
ATOM 6028 CB ILE A 278 -11.188 40.575 -64.566 1.00 0.00 B C  
ATOM 6029 CG2 ILE A 278 -10.541 41.922 -64.195 1.00 0.00 B C  
ATOM 6030 CG1 ILE A 278 -10.359 39.344 -64.157 1.00 0.00 B C  
ATOM 6031 CD ILE A 278 -10.888 38.031 -64.729 1.00 0.00 B C  
ATOM 6032 C ILE A 278 -12.386 40.715 -62.453 1.00 0.00 B C  
ATOM 6033 O ILE A 278 -12.092 39.760 -61.738 1.00 0.00 B O  
ATOM 6034 N SER A 279 -12.437 41.971 -61.975 1.00 0.00 B N  
ATOM 6035 CA SER A 279 -12.227 42.312 -60.588 1.00 0.00 B C  
ATOM 6036 CB SER A 279 -11.624 43.718 -60.423 1.00 0.00 B C  
ATOM 6037 OG SER A 279 -12.539 44.702 -60.880 1.00 0.00 B O  
ATOM 6038 C SER A 279 -13.450 42.248 -59.712 1.00 0.00 B C  
ATOM 6039 O SER A 279 -13.344 42.518 -58.518 1.00 0.00 B O  
ATOM 6040 N ALA A 280 -14.644 41.918 -60.236 1.00 0.00 B N  
ATOM 6041 CA ALA A 280 -15.821 42.012 -59.409 1.00 0.00 B C  
ATOM 6042 CB ALA A 280 -17.116 41.622 -60.142 1.00 0.00 B C  
ATOM 6043 C ALA A 280 -15.709 41.135 -58.196 1.00 0.00 B C  
ATOM 6044 O ALA A 280 -15.036 40.105 -58.199 1.00 0.00 B O  
ATOM 6045 N ARG A 281 -16.360 41.566 -57.093 1.00 0.00 B N  
ATOM 6046 CA ARG A 281 -16.360 40.800 -55.879 1.00 0.00 B C  
ATOM 6047 CB ARG A 281 -15.663 41.508 -54.705 1.00 0.00 B C  
ATOM 6048 CG ARG A 281 -16.144 42.935 -54.454 1.00 0.00 B C  
ATOM 6049 CD ARG A 281 -15.519 43.936 -55.432 1.00 0.00 B C  
ATOM 6050 NE ARG A 281 -15.838 45.315 -54.966 1.00 0.00 B N  
ATOM 6051 CZ ARG A 281 -14.996 45.957 -54.105 1.00 0.00 B C  
ATOM 6052 NH1 ARG A 281 -13.866 45.331 -53.658 1.00 0.00 B N  
ATOM 6053 NH2 ARG A 281 -15.277 47.227 -53.691 1.00 0.00 B N  
ATOM 6054 C ARG A 281 -17.769 40.429 -55.522 1.00 0.00 B C  
ATOM 6055 O ARG A 281 -18.705 41.192 -55.746 1.00 0.00 B O  
ATOM 6056 N ASP A 282 -17.948 39.204 -54.977 1.00 0.00 B N  
ATOM 6057 CA ASP A 282 -19.259 38.728 -54.630 1.00 0.00 B C  
ATOM 6058 CB ASP A 282 -19.431 37.200 -54.696 1.00 0.00 B C  
ATOM 6059 CG ASP A 282 -18.490 36.495 -53.735 1.00 0.00 B C  
ATOM 6060 OD1 ASP A 282 -17.938 37.144 -52.805 1.00 0.00 B O

ATOM 6061 OD2 ASP A 282 -18.316 35.265 -53.935 1.00 0.00 B O  
ATOM 6062 C ASP A 282 -19.628 39.246 -53.274 1.00 0.00 B C  
ATOM 6063 O ASP A 282 -18.922 40.073 -52.701 1.00 0.00 B O  
ATOM 6064 N SER A 283 -20.752 38.751 -52.714 1.00 0.00 B N  
ATOM 6065 CA SER A 283 -21.282 39.276 -51.487 1.00 0.00 B C  
ATOM 6066 CB SER A 283 -22.489 38.475 -50.973 1.00 0.00 B C  
ATOM 6067 OG SER A 283 -23.564 38.572 -51.895 1.00 0.00 B O  
ATOM 6068 C SER A 283 -20.235 39.223 -50.413 1.00 0.00 B C  
ATOM 6069 O SER A 283 -20.136 40.134 -49.589 1.00 0.00 B O  
ATOM 6070 N VAL A 284 -19.448 38.138 -50.402 1.00 0.00 B N  
ATOM 6071 CA VAL A 284 -18.392 37.867 -49.466 1.00 0.00 B C  
ATOM 6072 CB VAL A 284 -17.871 36.465 -49.601 1.00 0.00 B C  
ATOM 6073 CG1 VAL A 284 -16.652 36.293 -48.679 1.00 0.00 B C  
ATOM 6074 CG2 VAL A 284 -19.020 35.487 -49.302 1.00 0.00 B C  
ATOM 6075 C VAL A 284 -17.240 38.808 -49.681 1.00 0.00 B C  
ATOM 6076 O VAL A 284 -16.445 39.032 -48.771 1.00 0.00 B O  
ATOM 6077 N GLY A 285 -17.082 39.359 -50.900 1.00 0.00 B N  
ATOM 6078 CA GLY A 285 -15.965 40.223 -51.166 1.00 0.00 B C  
ATOM 6079 C GLY A 285 -14.981 39.434 -51.967 1.00 0.00 B C  
ATOM 6080 O GLY A 285 -13.935 39.938 -52.371 1.00 0.00 B O  
ATOM 6081 N ASN A 286 -15.308 38.155 -52.224 1.00 0.00 B N  
ATOM 6082 CA ASN A 286 -14.407 37.301 -52.940 1.00 0.00 B C  
ATOM 6083 CB ASN A 286 -14.677 35.801 -52.719 1.00 0.00 B C  
ATOM 6084 CG ASN A 286 -14.283 35.459 -51.289 1.00 0.00 B C  
ATOM 6085 OD1 ASN A 286 -13.516 36.180 -50.653 1.00 0.00 B O  
ATOM 6086 ND2 ASN A 286 -14.815 34.319 -50.773 1.00 0.00 B N  
ATOM 6087 C ASN A 286 -14.473 37.550 -54.410 1.00 0.00 B C  
ATOM 6088 O ASN A 286 -15.541 37.751 -54.989 1.00 0.00 B O  
ATOM 6089 N THR A 287 -13.285 37.547 -55.046 1.00 0.00 B N  
ATOM 6090 CA THR A 287 -13.175 37.651 -56.469 1.00 0.00 B C  
ATOM 6091 CB THR A 287 -11.999 38.468 -56.919 1.00 0.00 B C  
ATOM 6092 OG1 THR A 287 -10.792 37.867 -56.480 1.00 0.00 B O  
ATOM 6093 CG2 THR A 287 -12.132 39.890 -56.341 1.00 0.00 B C  
ATOM 6094 C THR A 287 -12.986 36.248 -56.959 1.00 0.00 B C  
ATOM 6095 O THR A 287 -13.010 35.299 -56.172 1.00 0.00 B O  
ATOM 6096 N VAL A 288 -12.784 36.084 -58.282 1.00 0.00 B N  
ATOM 6097 CA VAL A 288 -12.626 34.773 -58.849 1.00 0.00 B C  
ATOM 6098 CB VAL A 288 -12.443 34.766 -60.343 1.00 0.00 B C

|      |      |     |           |         |        |         |      |      |   |   |
|------|------|-----|-----------|---------|--------|---------|------|------|---|---|
| ATOM | 6099 | CG1 | VAL A 288 | -13.745 | 35.244 | -60.997 | 1.00 | 0.00 | B | C |
| ATOM | 6100 | CG2 | VAL A 288 | -11.224 | 35.623 | -60.712 | 1.00 | 0.00 | B | C |
| ATOM | 6101 | C   | VAL A 288 | -11.431 | 34.125 | -58.229 | 1.00 | 0.00 | B | C |
| ATOM | 6102 | O   | VAL A 288 | -11.419 | 32.912 | -58.022 | 1.00 | 0.00 | B | O |
| ATOM | 6103 | N   | LEU A 289 | -10.379 | 34.915 | -57.951 | 1.00 | 0.00 | B | N |
| ATOM | 6104 | CA  | LEU A 289 | -9.208  | 34.369 | -57.330 | 1.00 | 0.00 | B | C |
| ATOM | 6105 | CB  | LEU A 289 | -8.083  | 35.408 | -57.186 | 1.00 | 0.00 | B | C |
| ATOM | 6106 | CG  | LEU A 289 | -7.605  | 35.969 | -58.543 | 1.00 | 0.00 | B | C |
| ATOM | 6107 | CD1 | LEU A 289 | -6.397  | 36.907 | -58.373 | 1.00 | 0.00 | B | C |
| ATOM | 6108 | CD2 | LEU A 289 | -7.360  | 34.846 | -59.563 | 1.00 | 0.00 | B | C |
| ATOM | 6109 | C   | LEU A 289 | -9.588  | 33.876 | -55.961 | 1.00 | 0.00 | B | C |
| ATOM | 6110 | O   | LEU A 289 | -9.214  | 32.775 | -55.561 | 1.00 | 0.00 | B | O |
| ATOM | 6111 | N   | HSD A 290 | -10.373 | 34.668 | -55.200 | 1.00 | 0.00 | B | N |
| ATOM | 6112 | CA  | HSD A 290 | -10.749 | 34.229 | -53.885 | 1.00 | 0.00 | B | C |
| ATOM | 6113 | CB  | HSD A 290 | -11.593 | 35.255 | -53.109 | 1.00 | 0.00 | B | C |
| ATOM | 6114 | ND1 | HSD A 290 | -9.806  | 36.510 | -51.812 | 1.00 | 0.00 | B | N |
| ATOM | 6115 | CG  | HSD A 290 | -10.831 | 36.488 | -52.730 | 1.00 | 0.00 | B | C |
| ATOM | 6116 | CE1 | HSD A 290 | -9.382  | 37.797 | -51.726 | 1.00 | 0.00 | B | C |
| ATOM | 6117 | NE2 | HSD A 290 | -10.061 | 38.601 | -52.522 | 1.00 | 0.00 | B | N |
| ATOM | 6118 | CD2 | HSD A 290 | -10.974 | 37.774 | -53.156 | 1.00 | 0.00 | B | C |
| ATOM | 6119 | C   | HSD A 290 | -11.571 | 32.970 | -53.980 | 1.00 | 0.00 | B | C |
| ATOM | 6120 | O   | HSD A 290 | -11.351 | 32.014 | -53.238 | 1.00 | 0.00 | B | O |
| ATOM | 6121 | N   | ALA A 291 | -12.532 | 32.923 | -54.920 | 1.00 | 0.00 | B | N |
| ATOM | 6122 | CA  | ALA A 291 | -13.421 | 31.795 | -55.030 | 1.00 | 0.00 | B | C |
| ATOM | 6123 | CB  | ALA A 291 | -14.463 | 31.956 | -56.150 | 1.00 | 0.00 | B | C |
| ATOM | 6124 | C   | ALA A 291 | -12.639 | 30.547 | -55.321 | 1.00 | 0.00 | B | C |
| ATOM | 6125 | O   | ALA A 291 | -12.950 | 29.481 | -54.787 | 1.00 | 0.00 | B | O |
| ATOM | 6126 | N   | LEU A 292 | -11.604 | 30.644 | -56.178 | 1.00 | 0.00 | B | N |
| ATOM | 6127 | CA  | LEU A 292 | -10.811 | 29.507 | -56.556 | 1.00 | 0.00 | B | C |
| ATOM | 6128 | CB  | LEU A 292 | -9.719  | 29.866 | -57.576 | 1.00 | 0.00 | B | C |
| ATOM | 6129 | CG  | LEU A 292 | -10.269 | 30.152 | -58.985 | 1.00 | 0.00 | B | C |
| ATOM | 6130 | CD1 | LEU A 292 | -9.141  | 30.514 | -59.963 | 1.00 | 0.00 | B | C |
| ATOM | 6131 | CD2 | LEU A 292 | -11.114 | 28.966 | -59.486 | 1.00 | 0.00 | B | C |
| ATOM | 6132 | C   | LEU A 292 | -10.139 | 28.947 | -55.341 | 1.00 | 0.00 | B | C |
| ATOM | 6133 | O   | LEU A 292 | -10.083 | 27.733 | -55.157 | 1.00 | 0.00 | B | O |
| ATOM | 6134 | N   | VAL A 293 | -9.613  | 29.829 | -54.471 | 1.00 | 0.00 | B | N |
| ATOM | 6135 | CA  | VAL A 293 | -8.953  | 29.408 | -53.271 | 1.00 | 0.00 | B | C |
| ATOM | 6136 | CB  | VAL A 293 | -8.446  | 30.565 | -52.462 | 1.00 | 0.00 | B | C |

|      |      |     |           |         |        |         |      |      |   |   |
|------|------|-----|-----------|---------|--------|---------|------|------|---|---|
| ATOM | 6137 | CG1 | VAL A 293 | -7.894  | 30.032 | -51.129 | 1.00 | 0.00 | B | C |
| ATOM | 6138 | CG2 | VAL A 293 | -7.406  | 31.331 | -53.298 | 1.00 | 0.00 | B | C |
| ATOM | 6139 | C   | VAL A 293 | -9.951  | 28.671 | -52.434 | 1.00 | 0.00 | B | C |
| ATOM | 6140 | O   | VAL A 293 | -9.624  | 27.678 | -51.792 | 1.00 | 0.00 | B | O |
| ATOM | 6141 | N   | GLU A 294 | -11.208 | 29.150 | -52.415 | 1.00 | 0.00 | B | N |
| ATOM | 6142 | CA  | GLU A 294 | -12.228 | 28.546 | -51.604 | 1.00 | 0.00 | B | C |
| ATOM | 6143 | CB  | GLU A 294 | -13.526 | 29.373 | -51.563 | 1.00 | 0.00 | B | C |
| ATOM | 6144 | CG  | GLU A 294 | -14.383 | 29.044 | -50.342 | 1.00 | 0.00 | B | C |
| ATOM | 6145 | CD  | GLU A 294 | -13.639 | 29.605 | -49.138 | 1.00 | 0.00 | B | C |
| ATOM | 6146 | OE1 | GLU A 294 | -13.503 | 30.856 | -49.064 | 1.00 | 0.00 | B | O |
| ATOM | 6147 | OE2 | GLU A 294 | -13.184 | 28.795 | -48.289 | 1.00 | 0.00 | B | O |
| ATOM | 6148 | C   | GLU A 294 | -12.563 | 27.175 | -52.113 | 1.00 | 0.00 | B | C |
| ATOM | 6149 | O   | GLU A 294 | -12.922 | 26.289 | -51.340 | 1.00 | 0.00 | B | O |
| ATOM | 6150 | N   | VAL A 295 | -12.496 | 26.977 | -53.443 | 1.00 | 0.00 | B | N |
| ATOM | 6151 | CA  | VAL A 295 | -12.871 | 25.742 | -54.074 | 1.00 | 0.00 | B | C |
| ATOM | 6152 | CB  | VAL A 295 | -13.121 | 25.861 | -55.554 | 1.00 | 0.00 | B | C |
| ATOM | 6153 | CG1 | VAL A 295 | -11.787 | 25.921 | -56.312 | 1.00 | 0.00 | B | C |
| ATOM | 6154 | CG2 | VAL A 295 | -14.037 | 24.703 | -55.984 | 1.00 | 0.00 | B | C |
| ATOM | 6155 | C   | VAL A 295 | -11.865 | 24.643 | -53.832 | 1.00 | 0.00 | B | C |
| ATOM | 6156 | O   | VAL A 295 | -12.207 | 23.468 | -53.963 | 1.00 | 0.00 | B | O |
| ATOM | 6157 | N   | ALA A 296 | -10.586 | 24.975 | -53.545 | 1.00 | 0.00 | B | N |
| ATOM | 6158 | CA  | ALA A 296 | -9.562  | 23.967 | -53.396 | 1.00 | 0.00 | B | C |
| ATOM | 6159 | CB  | ALA A 296 | -8.145  | 24.557 | -53.291 | 1.00 | 0.00 | B | C |
| ATOM | 6160 | C   | ALA A 296 | -9.782  | 23.095 | -52.183 | 1.00 | 0.00 | B | C |
| ATOM | 6161 | O   | ALA A 296 | -10.113 | 23.582 | -51.103 | 1.00 | 0.00 | B | O |
| ATOM | 6162 | N   | ASP A 297 | -9.731  | 21.757 | -52.393 | 1.00 | 0.00 | B | N |
| ATOM | 6163 | CA  | ASP A 297 | -9.786  | 20.722 | -51.384 | 1.00 | 0.00 | B | C |
| ATOM | 6164 | CB  | ASP A 297 | -10.781 | 19.567 | -51.637 | 1.00 | 0.00 | B | C |
| ATOM | 6165 | CG  | ASP A 297 | -10.366 | 18.722 | -52.817 | 1.00 | 0.00 | B | C |
| ATOM | 6166 | OD1 | ASP A 297 | -9.967  | 19.316 | -53.843 | 1.00 | 0.00 | B | O |
| ATOM | 6167 | OD2 | ASP A 297 | -10.461 | 17.469 | -52.717 | 1.00 | 0.00 | B | O |
| ATOM | 6168 | C   | ASP A 297 | -8.448  | 20.166 | -50.960 | 1.00 | 0.00 | B | C |
| ATOM | 6169 | O   | ASP A 297 | -8.399  | 19.293 | -50.093 | 1.00 | 0.00 | B | O |
| ATOM | 6170 | N   | ASN A 298 | -7.334  | 20.558 | -51.611 | 1.00 | 0.00 | B | N |
| ATOM | 6171 | CA  | ASN A 298 | -6.030  | 20.035 | -51.290 | 1.00 | 0.00 | B | C |
| ATOM | 6172 | CB  | ASN A 298 | -5.707  | 20.093 | -49.788 | 1.00 | 0.00 | B | C |
| ATOM | 6173 | CG  | ASN A 298 | -5.500  | 21.559 | -49.437 | 1.00 | 0.00 | B | C |
| ATOM | 6174 | OD1 | ASN A 298 | -4.768  | 22.269 | -50.125 | 1.00 | 0.00 | B | O |

|      |      |               |         |        |         |      |      |   |   |
|------|------|---------------|---------|--------|---------|------|------|---|---|
| ATOM | 6175 | ND2 ASN A 298 | -6.169  | 22.032 | -48.352 | 1.00 | 0.00 | B | N |
| ATOM | 6176 | C ASN A 298   | -5.842  | 18.629 | -51.777 | 1.00 | 0.00 | B | C |
| ATOM | 6177 | O ASN A 298   | -5.013  | 17.887 | -51.251 | 1.00 | 0.00 | B | O |
| ATOM | 6178 | N THR A 299   | -6.603  | 18.220 | -52.808 | 1.00 | 0.00 | B | N |
| ATOM | 6179 | CA THR A 299  | -6.331  | 16.957 | -53.427 | 1.00 | 0.00 | B | C |
| ATOM | 6180 | CB THR A 299  | -7.558  | 16.281 | -53.959 | 1.00 | 0.00 | B | C |
| ATOM | 6181 | OG1 THR A 299 | -7.241  | 14.976 | -54.403 | 1.00 | 0.00 | B | O |
| ATOM | 6182 | CG2 THR A 299 | -8.130  | 17.100 | -55.118 | 1.00 | 0.00 | B | C |
| ATOM | 6183 | C THR A 299   | -5.404  | 17.286 | -54.561 | 1.00 | 0.00 | B | C |
| ATOM | 6184 | O THR A 299   | -5.373  | 18.425 | -55.022 | 1.00 | 0.00 | B | O |
| ATOM | 6185 | N ALA A 300   | -4.618  | 16.306 | -55.048 | 1.00 | 0.00 | B | N |
| ATOM | 6186 | CA ALA A 300  | -3.633  | 16.595 | -56.056 | 1.00 | 0.00 | B | C |
| ATOM | 6187 | CB ALA A 300  | -2.799  | 15.360 | -56.445 | 1.00 | 0.00 | B | C |
| ATOM | 6188 | C ALA A 300   | -4.286  | 17.105 | -57.301 | 1.00 | 0.00 | B | C |
| ATOM | 6189 | O ALA A 300   | -3.823  | 18.073 | -57.902 | 1.00 | 0.00 | B | O |
| ATOM | 6190 | N ASP A 301   | -5.395  | 16.470 | -57.713 | 1.00 | 0.00 | B | N |
| ATOM | 6191 | CA ASP A 301  | -6.076  | 16.825 | -58.925 | 1.00 | 0.00 | B | C |
| ATOM | 6192 | CB ASP A 301  | -7.263  | 15.886 | -59.203 | 1.00 | 0.00 | B | C |
| ATOM | 6193 | CG ASP A 301  | -6.714  | 14.481 | -59.420 | 1.00 | 0.00 | B | C |
| ATOM | 6194 | OD1 ASP A 301 | -5.679  | 14.349 | -60.129 | 1.00 | 0.00 | B | O |
| ATOM | 6195 | OD2 ASP A 301 | -7.312  | 13.524 | -58.863 | 1.00 | 0.00 | B | O |
| ATOM | 6196 | C ASP A 301   | -6.626  | 18.210 | -58.791 | 1.00 | 0.00 | B | C |
| ATOM | 6197 | O ASP A 301   | -6.629  | 18.980 | -59.753 | 1.00 | 0.00 | B | O |
| ATOM | 6198 | N ASN A 302   | -7.132  | 18.546 | -57.589 | 1.00 | 0.00 | B | N |
| ATOM | 6199 | CA ASN A 302  | -7.763  | 19.812 | -57.343 | 1.00 | 0.00 | B | C |
| ATOM | 6200 | CB ASN A 302  | -8.340  | 19.910 | -55.935 | 1.00 | 0.00 | B | C |
| ATOM | 6201 | CG ASN A 302  | -8.992  | 21.268 | -55.744 | 1.00 | 0.00 | B | C |
| ATOM | 6202 | OD1 ASN A 302 | -8.311  | 22.255 | -55.468 | 1.00 | 0.00 | B | O |
| ATOM | 6203 | ND2 ASN A 302 | -10.340 | 21.330 | -55.892 | 1.00 | 0.00 | B | N |
| ATOM | 6204 | C ASN A 302   | -6.795  | 20.936 | -57.457 | 1.00 | 0.00 | B | C |
| ATOM | 6205 | O ASN A 302   | -7.084  | 21.936 | -58.113 | 1.00 | 0.00 | B | O |
| ATOM | 6206 | N THR A 303   | -5.616  | 20.799 | -56.824 | 1.00 | 0.00 | B | N |
| ATOM | 6207 | CA THR A 303  | -4.682  | 21.882 | -56.863 | 1.00 | 0.00 | B | C |
| ATOM | 6208 | CB THR A 303  | -3.393  | 21.614 | -56.144 | 1.00 | 0.00 | B | C |
| ATOM | 6209 | OG1 THR A 303 | -2.716  | 20.515 | -56.734 | 1.00 | 0.00 | B | O |
| ATOM | 6210 | CG2 THR A 303 | -3.699  | 21.330 | -54.671 | 1.00 | 0.00 | B | C |
| ATOM | 6211 | C THR A 303   | -4.334  | 22.121 | -58.285 | 1.00 | 0.00 | B | C |
| ATOM | 6212 | O THR A 303   | -4.298  | 23.262 | -58.741 | 1.00 | 0.00 | B | O |



|      |      |     |           |         |        |         |      |      |   |   |
|------|------|-----|-----------|---------|--------|---------|------|------|---|---|
| ATOM | 6213 | N   | LYS A 304 | -4.123  | 21.034 | -59.046 | 1.00 | 0.00 | B | N |
| ATOM | 6214 | CA  | LYS A 304 | -3.660  | 21.184 | -60.390 | 1.00 | 0.00 | B | C |
| ATOM | 6215 | CB  | LYS A 304 | -3.524  | 19.842 | -61.136 | 1.00 | 0.00 | B | C |
| ATOM | 6216 | CG  | LYS A 304 | -2.459  | 18.923 | -60.534 | 1.00 | 0.00 | B | C |
| ATOM | 6217 | CD  | LYS A 304 | -1.059  | 19.539 | -60.502 | 1.00 | 0.00 | B | C |
| ATOM | 6218 | CE  | LYS A 304 | -0.020  | 18.676 | -59.781 | 1.00 | 0.00 | B | C |
| ATOM | 6219 | NZ  | LYS A 304 | 1.297   | 19.350 | -59.793 | 1.00 | 0.00 | B | N |
| ATOM | 6220 | C   | LYS A 304 | -4.618  | 22.029 | -61.171 | 1.00 | 0.00 | B | C |
| ATOM | 6221 | O   | LYS A 304 | -4.197  | 22.966 | -61.844 | 1.00 | 0.00 | B | O |
| ATOM | 6222 | N   | PHE A 305 | -5.933  | 21.742 | -61.109 | 1.00 | 0.00 | B | N |
| ATOM | 6223 | CA  | PHE A 305 | -6.824  | 22.507 | -61.935 | 1.00 | 0.00 | B | C |
| ATOM | 6224 | CB  | PHE A 305 | -8.223  | 21.884 | -62.140 | 1.00 | 0.00 | B | C |
| ATOM | 6225 | CG  | PHE A 305 | -9.084  | 22.077 | -60.944 | 1.00 | 0.00 | B | C |
| ATOM | 6226 | CD1 | PHE A 305 | -9.826  | 23.229 | -60.832 | 1.00 | 0.00 | B | C |
| ATOM | 6227 | CE1 | PHE A 305 | -10.639 | 23.439 | -59.746 | 1.00 | 0.00 | B | C |
| ATOM | 6228 | CZ  | PHE A 305 | -10.716 | 22.484 | -58.762 | 1.00 | 0.00 | B | C |
| ATOM | 6229 | CD2 | PHE A 305 | -9.169  | 21.120 | -59.961 | 1.00 | 0.00 | B | C |
| ATOM | 6230 | CE2 | PHE A 305 | -9.983  | 21.325 | -58.870 | 1.00 | 0.00 | B | C |
| ATOM | 6231 | C   | PHE A 305 | -6.974  | 23.918 | -61.427 | 1.00 | 0.00 | B | C |
| ATOM | 6232 | O   | PHE A 305 | -7.039  | 24.857 | -62.217 | 1.00 | 0.00 | B | O |
| ATOM | 6233 | N   | VAL A 306 | -7.058  | 24.112 | -60.094 | 1.00 | 0.00 | B | N |
| ATOM | 6234 | CA  | VAL A 306 | -7.247  | 25.434 | -59.555 | 1.00 | 0.00 | B | C |
| ATOM | 6235 | CB  | VAL A 306 | -7.436  | 25.433 | -58.066 | 1.00 | 0.00 | B | C |
| ATOM | 6236 | CG1 | VAL A 306 | -7.475  | 26.890 | -57.574 | 1.00 | 0.00 | B | C |
| ATOM | 6237 | CG2 | VAL A 306 | -8.714  | 24.641 | -57.745 | 1.00 | 0.00 | B | C |
| ATOM | 6238 | C   | VAL A 306 | -6.044  | 26.266 | -59.862 | 1.00 | 0.00 | B | C |
| ATOM | 6239 | O   | VAL A 306 | -6.155  | 27.418 | -60.280 | 1.00 | 0.00 | B | O |
| ATOM | 6240 | N   | THR A 307 | -4.854  | 25.664 | -59.701 | 1.00 | 0.00 | B | N |
| ATOM | 6241 | CA  | THR A 307 | -3.599  | 26.335 | -59.855 | 1.00 | 0.00 | B | C |
| ATOM | 6242 | CB  | THR A 307 | -2.461  | 25.367 | -59.684 | 1.00 | 0.00 | B | C |
| ATOM | 6243 | OG1 | THR A 307 | -2.378  | 24.934 | -58.334 | 1.00 | 0.00 | B | O |
| ATOM | 6244 | CG2 | THR A 307 | -1.153  | 25.992 | -60.172 | 1.00 | 0.00 | B | C |
| ATOM | 6245 | C   | THR A 307 | -3.479  | 26.961 | -61.213 | 1.00 | 0.00 | B | C |
| ATOM | 6246 | O   | THR A 307 | -3.087  | 28.121 | -61.323 | 1.00 | 0.00 | B | O |
| ATOM | 6247 | N   | SER A 308 | -3.791  | 26.198 | -62.273 | 1.00 | 0.00 | B | N |
| ATOM | 6248 | CA  | SER A 308 | -3.679  | 26.642 | -63.637 | 1.00 | 0.00 | B | C |
| ATOM | 6249 | CB  | SER A 308 | -3.797  | 25.474 | -64.627 | 1.00 | 0.00 | B | C |
| ATOM | 6250 | OG  | SER A 308 | -3.684  | 25.953 | -65.953 | 1.00 | 0.00 | B | O |

|      |      |     |           |         |        |         |      |      |   |   |
|------|------|-----|-----------|---------|--------|---------|------|------|---|---|
| ATOM | 6251 | C   | SER A 308 | -4.758  | 27.615 | -63.989 | 1.00 | 0.00 | B | C |
| ATOM | 6252 | O   | SER A 308 | -4.532  | 28.556 | -64.748 | 1.00 | 0.00 | B | O |
| ATOM | 6253 | N   | MET A 309 | -5.980  | 27.404 | -63.473 | 1.00 | 0.00 | B | N |
| ATOM | 6254 | CA  | MET A 309 | -7.048  | 28.298 | -63.810 | 1.00 | 0.00 | B | C |
| ATOM | 6255 | CB  | MET A 309 | -8.416  | 27.873 | -63.258 | 1.00 | 0.00 | B | C |
| ATOM | 6256 | CG  | MET A 309 | -9.529  | 28.843 | -63.655 | 1.00 | 0.00 | B | C |
| ATOM | 6257 | SD  | MET A 309 | -9.810  | 28.954 | -65.449 | 1.00 | 0.00 | B | S |
| ATOM | 6258 | CE  | MET A 309 | -10.245 | 27.206 | -65.673 | 1.00 | 0.00 | B | C |
| ATOM | 6259 | C   | MET A 309 | -6.707  | 29.635 | -63.243 | 1.00 | 0.00 | B | C |
| ATOM | 6260 | O   | MET A 309 | -7.016  | 30.666 | -63.833 | 1.00 | 0.00 | B | O |
| ATOM | 6261 | N   | TYR A 310 | -6.066  | 29.631 | -62.061 | 1.00 | 0.00 | B | N |
| ATOM | 6262 | CA  | TYR A 310 | -5.654  | 30.831 | -61.396 | 1.00 | 0.00 | B | C |
| ATOM | 6263 | CB  | TYR A 310 | -4.930  | 30.491 | -60.076 | 1.00 | 0.00 | B | C |
| ATOM | 6264 | CG  | TYR A 310 | -4.615  | 31.703 | -59.259 | 1.00 | 0.00 | B | C |
| ATOM | 6265 | CD1 | TYR A 310 | -5.555  | 32.228 | -58.404 | 1.00 | 0.00 | B | C |
| ATOM | 6266 | CE1 | TYR A 310 | -5.276  | 33.334 | -57.635 | 1.00 | 0.00 | B | C |
| ATOM | 6267 | CZ  | TYR A 310 | -4.039  | 33.928 | -57.712 | 1.00 | 0.00 | B | C |
| ATOM | 6268 | OH  | TYR A 310 | -3.747  | 35.063 | -56.924 | 1.00 | 0.00 | B | O |
| ATOM | 6269 | CD2 | TYR A 310 | -3.376  | 32.302 | -59.324 | 1.00 | 0.00 | B | C |
| ATOM | 6270 | CE2 | TYR A 310 | -3.090  | 33.409 | -58.558 | 1.00 | 0.00 | B | C |
| ATOM | 6271 | C   | TYR A 310 | -4.677  | 31.519 | -62.306 | 1.00 | 0.00 | B | C |
| ATOM | 6272 | O   | TYR A 310 | -4.804  | 32.710 | -62.586 | 1.00 | 0.00 | B | O |
| ATOM | 6273 | N   | ASN A 311 | -3.704  | 30.756 | -62.842 | 1.00 | 0.00 | B | N |
| ATOM | 6274 | CA  | ASN A 311 | -2.694  | 31.306 | -63.697 | 1.00 | 0.00 | B | C |
| ATOM | 6275 | CB  | ASN A 311 | -1.702  | 30.248 | -64.204 | 1.00 | 0.00 | B | C |
| ATOM | 6276 | CG  | ASN A 311 | -0.588  | 30.983 | -64.936 | 1.00 | 0.00 | B | C |
| ATOM | 6277 | OD1 | ASN A 311 | -0.554  | 32.212 | -64.962 | 1.00 | 0.00 | B | O |
| ATOM | 6278 | ND2 | ASN A 311 | 0.341   | 30.210 | -65.558 | 1.00 | 0.00 | B | N |
| ATOM | 6279 | C   | ASN A 311 | -3.364  | 31.897 | -64.893 | 1.00 | 0.00 | B | C |
| ATOM | 6280 | O   | ASN A 311 | -3.003  | 32.978 | -65.353 | 1.00 | 0.00 | B | O |
| ATOM | 6281 | N   | GLU A 312 | -4.381  | 31.193 | -65.416 | 1.00 | 0.00 | B | N |
| ATOM | 6282 | CA  | GLU A 312 | -5.074  | 31.624 | -66.593 | 1.00 | 0.00 | B | C |
| ATOM | 6283 | CB  | GLU A 312 | -6.188  | 30.653 | -67.015 | 1.00 | 0.00 | B | C |
| ATOM | 6284 | CG  | GLU A 312 | -5.662  | 29.397 | -67.702 | 1.00 | 0.00 | B | C |
| ATOM | 6285 | CD  | GLU A 312 | -5.137  | 29.845 | -69.056 | 1.00 | 0.00 | B | C |
| ATOM | 6286 | OE1 | GLU A 312 | -5.726  | 30.801 | -69.623 | 1.00 | 0.00 | B | O |
| ATOM | 6287 | OE2 | GLU A 312 | -4.138  | 29.248 | -69.537 | 1.00 | 0.00 | B | O |
| ATOM | 6288 | C   | GLU A 312 | -5.724  | 32.944 | -66.344 | 1.00 | 0.00 | B | C |

|      |      |     |           |        |        |         |      |      |   |   |
|------|------|-----|-----------|--------|--------|---------|------|------|---|---|
| ATOM | 6289 | O   | GLU A 312 | -5.696 | 33.818 | -67.205 | 1.00 | 0.00 | B | O |
| ATOM | 6290 | N   | ILE A 313 | -6.327 | 33.135 | -65.160 | 1.00 | 0.00 | B | N |
| ATOM | 6291 | CA  | ILE A 313 | -7.018 | 34.361 | -64.889 | 1.00 | 0.00 | B | C |
| ATOM | 6292 | CB  | ILE A 313 | -7.667 | 34.370 | -63.535 | 1.00 | 0.00 | B | C |
| ATOM | 6293 | CG2 | ILE A 313 | -8.132 | 35.805 | -63.244 | 1.00 | 0.00 | B | C |
| ATOM | 6294 | CG1 | ILE A 313 | -8.798 | 33.327 | -63.465 | 1.00 | 0.00 | B | C |
| ATOM | 6295 | CD  | ILE A 313 | -9.939 | 33.597 | -64.444 | 1.00 | 0.00 | B | C |
| ATOM | 6296 | C   | ILE A 313 | -6.043 | 35.492 | -64.923 | 1.00 | 0.00 | B | C |
| ATOM | 6297 | O   | ILE A 313 | -6.321 | 36.542 | -65.499 | 1.00 | 0.00 | B | O |
| ATOM | 6298 | N   | LEU A 314 | -4.862 | 35.307 | -64.301 | 1.00 | 0.00 | B | N |
| ATOM | 6299 | CA  | LEU A 314 | -3.903 | 36.371 | -64.247 | 1.00 | 0.00 | B | C |
| ATOM | 6300 | CB  | LEU A 314 | -2.691 | 36.065 | -63.351 | 1.00 | 0.00 | B | C |
| ATOM | 6301 | CG  | LEU A 314 | -3.042 | 36.008 | -61.850 | 1.00 | 0.00 | B | C |
| ATOM | 6302 | CD1 | LEU A 314 | -1.786 | 35.795 | -60.991 | 1.00 | 0.00 | B | C |
| ATOM | 6303 | CD2 | LEU A 314 | -3.850 | 37.242 | -61.415 | 1.00 | 0.00 | B | C |
| ATOM | 6304 | C   | LEU A 314 | -3.416 | 36.714 | -65.625 | 1.00 | 0.00 | B | C |
| ATOM | 6305 | O   | LEU A 314 | -3.309 | 37.889 | -65.971 | 1.00 | 0.00 | B | O |
| ATOM | 6306 | N   | MET A 315 | -3.146 | 35.701 | -66.472 | 1.00 | 0.00 | B | N |
| ATOM | 6307 | CA  | MET A 315 | -2.634 | 35.960 | -67.786 | 1.00 | 0.00 | B | C |
| ATOM | 6308 | CB  | MET A 315 | -2.412 | 34.666 | -68.591 | 1.00 | 0.00 | B | C |
| ATOM | 6309 | CG  | MET A 315 | -1.347 | 33.753 | -67.978 | 1.00 | 0.00 | B | C |
| ATOM | 6310 | SD  | MET A 315 | -1.049 | 32.213 | -68.895 | 1.00 | 0.00 | B | S |
| ATOM | 6311 | CE  | MET A 315 | -2.664 | 31.486 | -68.492 | 1.00 | 0.00 | B | C |
| ATOM | 6312 | C   | MET A 315 | -3.642 | 36.795 | -68.516 | 1.00 | 0.00 | B | C |
| ATOM | 6313 | O   | MET A 315 | -3.292 | 37.707 | -69.260 | 1.00 | 0.00 | B | O |
| ATOM | 6314 | N   | LEU A 316 | -4.933 | 36.482 | -68.335 | 1.00 | 0.00 | B | N |
| ATOM | 6315 | CA  | LEU A 316 | -5.998 | 37.221 | -68.956 | 1.00 | 0.00 | B | C |
| ATOM | 6316 | CB  | LEU A 316 | -7.376 | 36.546 | -68.795 | 1.00 | 0.00 | B | C |
| ATOM | 6317 | CG  | LEU A 316 | -7.655 | 35.392 | -69.787 | 1.00 | 0.00 | B | C |
| ATOM | 6318 | CD1 | LEU A 316 | -6.578 | 34.300 | -69.749 | 1.00 | 0.00 | B | C |
| ATOM | 6319 | CD2 | LEU A 316 | -9.063 | 34.808 | -69.572 | 1.00 | 0.00 | B | C |
| ATOM | 6320 | C   | LEU A 316 | -6.065 | 38.612 | -68.395 | 1.00 | 0.00 | B | C |
| ATOM | 6321 | O   | LEU A 316 | -6.330 | 39.566 | -69.126 | 1.00 | 0.00 | B | O |
| ATOM | 6322 | N   | GLY A 317 | -5.851 | 38.765 | -67.075 | 1.00 | 0.00 | B | N |
| ATOM | 6323 | CA  | GLY A 317 | -5.930 | 40.075 | -66.494 | 1.00 | 0.00 | B | C |
| ATOM | 6324 | C   | GLY A 317 | -4.867 | 40.938 | -67.097 | 1.00 | 0.00 | B | C |
| ATOM | 6325 | O   | GLY A 317 | -5.124 | 42.072 | -67.496 | 1.00 | 0.00 | B | O |
| ATOM | 6326 | N   | ALA A 318 | -3.633 | 40.409 | -67.192 | 1.00 | 0.00 | B | N |

|      |      |     |           |         |        |         |      |      |   |   |
|------|------|-----|-----------|---------|--------|---------|------|------|---|---|
| ATOM | 6327 | CA  | ALA A 318 | -2.537  | 41.184 | -67.693 | 1.00 | 0.00 | B | C |
| ATOM | 6328 | CB  | ALA A 318 | -1.198  | 40.431 | -67.614 | 1.00 | 0.00 | B | C |
| ATOM | 6329 | C   | ALA A 318 | -2.775  | 41.543 | -69.125 | 1.00 | 0.00 | B | C |
| ATOM | 6330 | O   | ALA A 318 | -2.506  | 42.669 | -69.539 | 1.00 | 0.00 | B | O |
| ATOM | 6331 | N   | LYS A 319 | -3.256  | 40.594 | -69.947 | 1.00 | 0.00 | B | N |
| ATOM | 6332 | CA  | LYS A 319 | -3.448  | 40.961 | -71.317 | 1.00 | 0.00 | B | C |
| ATOM | 6333 | CB  | LYS A 319 | -3.714  | 39.758 | -72.246 | 1.00 | 0.00 | B | C |
| ATOM | 6334 | CG  | LYS A 319 | -4.906  | 38.877 | -71.873 | 1.00 | 0.00 | B | C |
| ATOM | 6335 | CD  | LYS A 319 | -5.301  | 37.909 | -72.990 | 1.00 | 0.00 | B | C |
| ATOM | 6336 | CE  | LYS A 319 | -6.484  | 37.007 | -72.644 | 1.00 | 0.00 | B | C |
| ATOM | 6337 | NZ  | LYS A 319 | -6.735  | 36.071 | -73.763 | 1.00 | 0.00 | B | N |
| ATOM | 6338 | C   | LYS A 319 | -4.553  | 41.971 | -71.468 | 1.00 | 0.00 | B | C |
| ATOM | 6339 | O   | LYS A 319 | -4.350  | 43.017 | -72.085 | 1.00 | 0.00 | B | O |
| ATOM | 6340 | N   | LEU A 320 | -5.748  | 41.696 | -70.908 | 1.00 | 0.00 | B | N |
| ATOM | 6341 | CA  | LEU A 320 | -6.862  | 42.589 | -71.083 | 1.00 | 0.00 | B | C |
| ATOM | 6342 | CB  | LEU A 320 | -8.217  | 41.947 | -70.719 | 1.00 | 0.00 | B | C |
| ATOM | 6343 | CG  | LEU A 320 | -8.696  | 40.898 | -71.748 | 1.00 | 0.00 | B | C |
| ATOM | 6344 | CD1 | LEU A 320 | -7.734  | 39.705 | -71.842 | 1.00 | 0.00 | B | C |
| ATOM | 6345 | CD2 | LEU A 320 | -10.143 | 40.452 | -71.481 | 1.00 | 0.00 | B | C |
| ATOM | 6346 | C   | LEU A 320 | -6.724  | 43.882 | -70.330 | 1.00 | 0.00 | B | C |
| ATOM | 6347 | O   | LEU A 320 | -6.924  | 44.948 | -70.911 | 1.00 | 0.00 | B | O |
| ATOM | 6348 | N   | HSD A 321 | -6.375  | 43.845 | -69.025 | 1.00 | 0.00 | B | N |
| ATOM | 6349 | CA  | HSD A 321 | -6.295  | 45.080 | -68.283 | 1.00 | 0.00 | B | C |
| ATOM | 6350 | CB  | HSD A 321 | -7.499  | 45.270 | -67.346 | 1.00 | 0.00 | B | C |
| ATOM | 6351 | ND1 | HSD A 321 | -9.397  | 46.195 | -68.762 | 1.00 | 0.00 | B | N |
| ATOM | 6352 | CG  | HSD A 321 | -8.795  | 45.154 | -68.093 | 1.00 | 0.00 | B | C |
| ATOM | 6353 | CE1 | HSD A 321 | -10.521 | 45.694 | -69.332 | 1.00 | 0.00 | B | C |
| ATOM | 6354 | NE2 | HSD A 321 | -10.684 | 44.408 | -69.077 | 1.00 | 0.00 | B | N |
| ATOM | 6355 | CD2 | HSD A 321 | -9.595  | 44.069 | -68.295 | 1.00 | 0.00 | B | C |
| ATOM | 6356 | C   | HSD A 321 | -5.062  | 45.020 | -67.429 | 1.00 | 0.00 | B | C |
| ATOM | 6357 | O   | HSD A 321 | -5.094  | 44.523 | -66.305 | 1.00 | 0.00 | B | O |
| ATOM | 6358 | N   | PRO A 322 | -3.980  | 45.544 | -67.933 | 1.00 | 0.00 | B | N |
| ATOM | 6359 | CD  | PRO A 322 | -3.821  | 45.714 | -69.365 | 1.00 | 0.00 | B | C |
| ATOM | 6360 | CA  | PRO A 322 | -2.712  | 45.455 | -67.256 | 1.00 | 0.00 | B | C |
| ATOM | 6361 | CB  | PRO A 322 | -1.648  | 45.789 | -68.309 | 1.00 | 0.00 | B | C |
| ATOM | 6362 | CG  | PRO A 322 | -2.433  | 46.355 | -69.507 | 1.00 | 0.00 | B | C |
| ATOM | 6363 | C   | PRO A 322 | -2.564  | 46.230 | -65.987 | 1.00 | 0.00 | B | C |
| ATOM | 6364 | O   | PRO A 322 | -1.739  | 45.849 | -65.159 | 1.00 | 0.00 | B | O |

|      |      |     |     |   |     |        |        |         |      |      |   |   |
|------|------|-----|-----|---|-----|--------|--------|---------|------|------|---|---|
| ATOM | 6365 | N   | THR | A | 323 | -3.335 | 47.313 | -65.809 | 1.00 | 0.00 | B | N |
| ATOM | 6366 | CA  | THR | A | 323 | -3.170 | 48.175 | -64.679 | 1.00 | 0.00 | B | C |
| ATOM | 6367 | CB  | THR | A | 323 | -4.032 | 49.393 | -64.763 | 1.00 | 0.00 | B | C |
| ATOM | 6368 | OG1 | THR | A | 323 | -3.775 | 50.086 | -65.975 | 1.00 | 0.00 | B | O |
| ATOM | 6369 | CG2 | THR | A | 323 | -3.698 | 50.294 | -63.565 | 1.00 | 0.00 | B | C |
| ATOM | 6370 | C   | THR | A | 323 | -3.536 | 47.476 | -63.408 | 1.00 | 0.00 | B | C |
| ATOM | 6371 | O   | THR | A | 323 | -2.912 | 47.702 | -62.370 | 1.00 | 0.00 | B | O |
| ATOM | 6372 | N   | LEU | A | 324 | -4.559 | 46.603 | -63.458 | 1.00 | 0.00 | B | N |
| ATOM | 6373 | CA  | LEU | A | 324 | -5.123 | 46.037 | -62.265 | 1.00 | 0.00 | B | C |
| ATOM | 6374 | CB  | LEU | A | 324 | -6.414 | 45.254 | -62.539 | 1.00 | 0.00 | B | C |
| ATOM | 6375 | CG  | LEU | A | 324 | -7.475 | 46.059 | -63.309 | 1.00 | 0.00 | B | C |
| ATOM | 6376 | CD1 | LEU | A | 324 | -8.823 | 45.325 | -63.306 | 1.00 | 0.00 | B | C |
| ATOM | 6377 | CD2 | LEU | A | 324 | -7.566 | 47.511 | -62.820 | 1.00 | 0.00 | B | C |
| ATOM | 6378 | C   | LEU | A | 324 | -4.180 | 45.091 | -61.585 | 1.00 | 0.00 | B | C |
| ATOM | 6379 | O   | LEU | A | 324 | -3.619 | 44.190 | -62.204 | 1.00 | 0.00 | B | O |
| ATOM | 6380 | N   | LYS | A | 325 | -3.993 | 45.284 | -60.259 | 1.00 | 0.00 | B | N |
| ATOM | 6381 | CA  | LYS | A | 325 | -3.220 | 44.344 | -59.499 | 1.00 | 0.00 | B | C |
| ATOM | 6382 | CB  | LYS | A | 325 | -2.288 | 44.970 | -58.443 | 1.00 | 0.00 | B | C |
| ATOM | 6383 | CG  | LYS | A | 325 | -1.053 | 45.636 | -59.057 | 1.00 | 0.00 | B | C |
| ATOM | 6384 | CD  | LYS | A | 325 | -0.143 | 46.343 | -58.049 | 1.00 | 0.00 | B | C |
| ATOM | 6385 | CE  | LYS | A | 325 | 1.148  | 46.871 | -58.681 | 1.00 | 0.00 | B | C |
| ATOM | 6386 | NZ  | LYS | A | 325 | 1.992  | 47.530 | -57.659 | 1.00 | 0.00 | B | N |
| ATOM | 6387 | C   | LYS | A | 325 | -4.226 | 43.480 | -58.802 | 1.00 | 0.00 | B | C |
| ATOM | 6388 | O   | LYS | A | 325 | -4.715 | 43.801 | -57.718 | 1.00 | 0.00 | B | O |
| ATOM | 6389 | N   | LEU | A | 326 | -4.546 | 42.339 | -59.435 | 1.00 | 0.00 | B | N |
| ATOM | 6390 | CA  | LEU | A | 326 | -5.583 | 41.453 | -58.988 | 1.00 | 0.00 | B | C |
| ATOM | 6391 | CB  | LEU | A | 326 | -5.908 | 40.327 | -59.991 | 1.00 | 0.00 | B | C |
| ATOM | 6392 | CG  | LEU | A | 326 | -6.655 | 40.783 | -61.262 | 1.00 | 0.00 | B | C |
| ATOM | 6393 | CD1 | LEU | A | 326 | -5.798 | 41.709 | -62.136 | 1.00 | 0.00 | B | C |
| ATOM | 6394 | CD2 | LEU | A | 326 | -7.204 | 39.581 | -62.046 | 1.00 | 0.00 | B | C |
| ATOM | 6395 | C   | LEU | A | 326 | -5.289 | 40.795 | -57.673 | 1.00 | 0.00 | B | C |
| ATOM | 6396 | O   | LEU | A | 326 | -6.185 | 40.639 | -56.847 | 1.00 | 0.00 | B | O |
| ATOM | 6397 | N   | GLU | A | 327 | -4.033 | 40.384 | -57.433 | 1.00 | 0.00 | B | N |
| ATOM | 6398 | CA  | GLU | A | 327 | -3.716 | 39.618 | -56.256 | 1.00 | 0.00 | B | C |
| ATOM | 6399 | CB  | GLU | A | 327 | -2.301 | 39.021 | -56.289 | 1.00 | 0.00 | B | C |
| ATOM | 6400 | CG  | GLU | A | 327 | -2.207 | 37.864 | -57.285 | 1.00 | 0.00 | B | C |
| ATOM | 6401 | CD  | GLU | A | 327 | -0.805 | 37.280 | -57.235 | 1.00 | 0.00 | B | C |
| ATOM | 6402 | OE1 | GLU | A | 327 | 0.138  | 37.966 | -57.713 | 1.00 | 0.00 | B | O |

|      |      |     |     |   |     |         |        |         |      |      |   |   |
|------|------|-----|-----|---|-----|---------|--------|---------|------|------|---|---|
| ATOM | 6403 | OE2 | GLU | A | 327 | -0.657  | 36.141 | -56.719 | 1.00 | 0.00 | B | O |
| ATOM | 6404 | C   | GLU | A | 327 | -3.896  | 40.409 | -54.999 | 1.00 | 0.00 | B | C |
| ATOM | 6405 | O   | GLU | A | 327 | -4.037  | 39.844 | -53.916 | 1.00 | 0.00 | B | O |
| ATOM | 6406 | N   | GLU | A | 328 | -3.806  | 41.742 | -55.099 | 1.00 | 0.00 | B | N |
| ATOM | 6407 | CA  | GLU | A | 328 | -3.919  | 42.639 | -53.986 | 1.00 | 0.00 | B | C |
| ATOM | 6408 | CB  | GLU | A | 328 | -3.374  | 44.031 | -54.334 | 1.00 | 0.00 | B | C |
| ATOM | 6409 | CG  | GLU | A | 328 | -1.854  | 43.974 | -54.521 | 1.00 | 0.00 | B | C |
| ATOM | 6410 | CD  | GLU | A | 328 | -1.344  | 45.327 | -54.988 | 1.00 | 0.00 | B | C |
| ATOM | 6411 | OE1 | GLU | A | 328 | -2.145  | 46.098 | -55.579 | 1.00 | 0.00 | B | O |
| ATOM | 6412 | OE2 | GLU | A | 328 | -0.136  | 45.601 | -54.767 | 1.00 | 0.00 | B | O |
| ATOM | 6413 | C   | GLU | A | 328 | -5.323  | 42.767 | -53.437 | 1.00 | 0.00 | B | C |
| ATOM | 6414 | O   | GLU | A | 328 | -5.476  | 43.100 | -52.264 | 1.00 | 0.00 | B | O |
| ATOM | 6415 | N   | LEU | A | 329 | -6.383  | 42.545 | -54.248 | 1.00 | 0.00 | B | N |
| ATOM | 6416 | CA  | LEU | A | 329 | -7.746  | 42.799 | -53.824 | 1.00 | 0.00 | B | C |
| ATOM | 6417 | CB  | LEU | A | 329 | -8.785  | 42.589 | -54.942 | 1.00 | 0.00 | B | C |
| ATOM | 6418 | CG  | LEU | A | 329 | -8.641  | 43.568 | -56.124 | 1.00 | 0.00 | B | C |
| ATOM | 6419 | CD1 | LEU | A | 329 | -7.302  | 43.375 | -56.850 | 1.00 | 0.00 | B | C |
| ATOM | 6420 | CD2 | LEU | A | 329 | -9.850  | 43.477 | -57.071 | 1.00 | 0.00 | B | C |
| ATOM | 6421 | C   | LEU | A | 329 | -8.170  | 41.938 | -52.661 | 1.00 | 0.00 | B | C |
| ATOM | 6422 | O   | LEU | A | 329 | -8.085  | 40.711 | -52.703 | 1.00 | 0.00 | B | O |
| ATOM | 6423 | N   | THR | A | 330 | -8.705  | 42.598 | -51.602 | 1.00 | 0.00 | B | N |
| ATOM | 6424 | CA  | THR | A | 330 | -9.096  | 41.954 | -50.374 | 1.00 | 0.00 | B | C |
| ATOM | 6425 | CB  | THR | A | 330 | -8.842  | 42.808 | -49.168 | 1.00 | 0.00 | B | C |
| ATOM | 6426 | OG1 | THR | A | 330 | -9.650  | 43.975 | -49.224 | 1.00 | 0.00 | B | O |
| ATOM | 6427 | CG2 | THR | A | 330 | -7.355  | 43.197 | -49.144 | 1.00 | 0.00 | B | C |
| ATOM | 6428 | C   | THR | A | 330 | -10.566 | 41.650 | -50.359 | 1.00 | 0.00 | B | C |
| ATOM | 6429 | O   | THR | A | 330 | -11.384 | 42.416 | -50.861 | 1.00 | 0.00 | B | O |
| ATOM | 6430 | N   | ASN | A | 331 | -10.929 | 40.503 | -49.736 | 1.00 | 0.00 | B | N |
| ATOM | 6431 | CA  | ASN | A | 331 | -12.302 | 40.112 | -49.583 | 1.00 | 0.00 | B | C |
| ATOM | 6432 | CB  | ASN | A | 331 | -12.513 | 38.590 | -49.407 | 1.00 | 0.00 | B | C |
| ATOM | 6433 | CG  | ASN | A | 331 | -11.829 | 38.102 | -48.136 | 1.00 | 0.00 | B | C |
| ATOM | 6434 | OD1 | ASN | A | 331 | -11.214 | 38.868 | -47.396 | 1.00 | 0.00 | B | O |
| ATOM | 6435 | ND2 | ASN | A | 331 | -11.928 | 36.770 | -47.882 | 1.00 | 0.00 | B | N |
| ATOM | 6436 | C   | ASN | A | 331 | -12.836 | 40.845 | -48.386 | 1.00 | 0.00 | B | C |
| ATOM | 6437 | O   | ASN | A | 331 | -12.145 | 41.673 | -47.798 | 1.00 | 0.00 | B | O |
| ATOM | 6438 | N   | LYS | A | 332 | -14.083 | 40.545 | -47.982 | 1.00 | 0.00 | B | N |
| ATOM | 6439 | CA  | LYS | A | 332 | -14.756 | 41.252 | -46.923 | 1.00 | 0.00 | B | C |
| ATOM | 6440 | CB  | LYS | A | 332 | -16.048 | 40.529 | -46.513 | 1.00 | 0.00 | B | C |

|      |      |     |     |   |     |         |        |         |      |      |   |   |
|------|------|-----|-----|---|-----|---------|--------|---------|------|------|---|---|
| ATOM | 6441 | CG  | LYS | A | 332 | -16.896 | 41.216 | -45.445 | 1.00 | 0.00 | B | C |
| ATOM | 6442 | CD  | LYS | A | 332 | -18.159 | 40.410 | -45.114 | 1.00 | 0.00 | B | C |
| ATOM | 6443 | CE  | LYS | A | 332 | -18.830 | 39.780 | -46.339 | 1.00 | 0.00 | B | C |
| ATOM | 6444 | NZ  | LYS | A | 332 | -19.791 | 38.737 | -45.914 | 1.00 | 0.00 | B | N |
| ATOM | 6445 | C   | LYS | A | 332 | -13.893 | 41.240 | -45.699 | 1.00 | 0.00 | B | C |
| ATOM | 6446 | O   | LYS | A | 332 | -13.722 | 42.262 | -45.035 | 1.00 | 0.00 | B | O |
| ATOM | 6447 | N   | LYS | A | 333 | -13.308 | 40.077 | -45.383 | 1.00 | 0.00 | B | N |
| ATOM | 6448 | CA  | LYS | A | 333 | -12.524 | 39.872 | -44.199 | 1.00 | 0.00 | B | C |
| ATOM | 6449 | CB  | LYS | A | 333 | -12.127 | 38.401 | -43.995 | 1.00 | 0.00 | B | C |
| ATOM | 6450 | CG  | LYS | A | 333 | -13.338 | 37.506 | -43.727 | 1.00 | 0.00 | B | C |
| ATOM | 6451 | CD  | LYS | A | 333 | -13.038 | 36.010 | -43.817 | 1.00 | 0.00 | B | C |
| ATOM | 6452 | CE  | LYS | A | 333 | -14.286 | 35.138 | -43.674 | 1.00 | 0.00 | B | C |
| ATOM | 6453 | NZ  | LYS | A | 333 | -14.997 | 35.484 | -42.424 | 1.00 | 0.00 | B | N |
| ATOM | 6454 | C   | LYS | A | 333 | -11.275 | 40.704 | -44.245 | 1.00 | 0.00 | B | C |
| ATOM | 6455 | O   | LYS | A | 333 | -10.656 | 40.946 | -43.212 | 1.00 | 0.00 | B | O |
| ATOM | 6456 | N   | GLY | A | 334 | -10.839 | 41.142 | -45.441 | 1.00 | 0.00 | B | N |
| ATOM | 6457 | CA  | GLY | A | 334 | -9.625  | 41.906 | -45.501 | 1.00 | 0.00 | B | C |
| ATOM | 6458 | C   | GLY | A | 334 | -8.533  | 40.998 | -45.961 | 1.00 | 0.00 | B | C |
| ATOM | 6459 | O   | GLY | A | 334 | -7.352  | 41.299 | -45.799 | 1.00 | 0.00 | B | O |
| ATOM | 6460 | N   | MET | A | 335 | -8.909  | 39.854 | -46.570 | 1.00 | 0.00 | B | N |
| ATOM | 6461 | CA  | MET | A | 335 | -7.909  | 38.908 | -46.969 | 1.00 | 0.00 | B | C |
| ATOM | 6462 | CB  | MET | A | 335 | -8.280  | 37.462 | -46.599 | 1.00 | 0.00 | B | C |
| ATOM | 6463 | CG  | MET | A | 335 | -8.431  | 37.241 | -45.092 | 1.00 | 0.00 | B | C |
| ATOM | 6464 | SD  | MET | A | 335 | -8.888  | 35.547 | -44.613 | 1.00 | 0.00 | B | S |
| ATOM | 6465 | CE  | MET | A | 335 | -9.296  | 35.972 | -42.894 | 1.00 | 0.00 | B | C |
| ATOM | 6466 | C   | MET | A | 335 | -7.700  | 38.929 | -48.454 | 1.00 | 0.00 | B | C |
| ATOM | 6467 | O   | MET | A | 335 | -8.642  | 38.952 | -49.246 | 1.00 | 0.00 | B | O |
| ATOM | 6468 | N   | THR | A | 336 | -6.412  | 38.926 | -48.857 | 1.00 | 0.00 | B | N |
| ATOM | 6469 | CA  | THR | A | 336 | -6.050  | 38.794 | -50.237 | 1.00 | 0.00 | B | C |
| ATOM | 6470 | CB  | THR | A | 336 | -4.625  | 39.156 | -50.535 | 1.00 | 0.00 | B | C |
| ATOM | 6471 | OG1 | THR | A | 336 | -3.741  | 38.289 | -49.838 | 1.00 | 0.00 | B | O |
| ATOM | 6472 | CG2 | THR | A | 336 | -4.383  | 40.616 | -50.116 | 1.00 | 0.00 | B | C |
| ATOM | 6473 | C   | THR | A | 336 | -6.213  | 37.333 | -50.514 | 1.00 | 0.00 | B | C |
| ATOM | 6474 | O   | THR | A | 336 | -6.348  | 36.547 | -49.578 | 1.00 | 0.00 | B | O |
| ATOM | 6475 | N   | PRO | A | 337 | -6.211  | 36.921 | -51.755 | 1.00 | 0.00 | B | N |
| ATOM | 6476 | CD  | PRO | A | 337 | -6.405  | 37.805 | -52.890 | 1.00 | 0.00 | B | C |
| ATOM | 6477 | CA  | PRO | A | 337 | -6.402  | 35.536 | -52.082 | 1.00 | 0.00 | B | C |
| ATOM | 6478 | CB  | PRO | A | 337 | -6.358  | 35.473 | -53.607 | 1.00 | 0.00 | B | C |

|      |      |     |     |   |     |         |        |         |      |      |   |   |
|------|------|-----|-----|---|-----|---------|--------|---------|------|------|---|---|
| ATOM | 6479 | CG  | PRO | A | 337 | -6.831  | 36.875 | -54.042 | 1.00 | 0.00 | B | C |
| ATOM | 6480 | C   | PRO | A | 337 | -5.383  | 34.692 | -51.384 | 1.00 | 0.00 | B | C |
| ATOM | 6481 | O   | PRO | A | 337 | -5.746  | 33.661 | -50.827 | 1.00 | 0.00 | B | O |
| ATOM | 6482 | N   | LEU | A | 338 | -4.115  | 35.135 | -51.355 | 1.00 | 0.00 | B | N |
| ATOM | 6483 | CA  | LEU | A | 338 | -3.069  | 34.383 | -50.728 | 1.00 | 0.00 | B | C |
| ATOM | 6484 | CB  | LEU | A | 338 | -1.725  | 35.126 | -50.798 | 1.00 | 0.00 | B | C |
| ATOM | 6485 | CG  | LEU | A | 338 | -0.556  | 34.386 | -50.129 | 1.00 | 0.00 | B | C |
| ATOM | 6486 | CD1 | LEU | A | 338 | -0.174  | 33.114 | -50.902 | 1.00 | 0.00 | B | C |
| ATOM | 6487 | CD2 | LEU | A | 338 | 0.630   | 35.335 | -49.904 | 1.00 | 0.00 | B | C |
| ATOM | 6488 | C   | LEU | A | 338 | -3.394  | 34.218 | -49.278 | 1.00 | 0.00 | B | C |
| ATOM | 6489 | O   | LEU | A | 338 | -3.320  | 33.119 | -48.733 | 1.00 | 0.00 | B | O |
| ATOM | 6490 | N   | ALA | A | 339 | -3.807  | 35.316 | -48.618 | 1.00 | 0.00 | B | N |
| ATOM | 6491 | CA  | ALA | A | 339 | -4.045  | 35.310 | -47.204 | 1.00 | 0.00 | B | C |
| ATOM | 6492 | CB  | ALA | A | 339 | -4.458  | 36.692 | -46.669 | 1.00 | 0.00 | B | C |
| ATOM | 6493 | C   | ALA | A | 339 | -5.149  | 34.356 | -46.879 | 1.00 | 0.00 | B | C |
| ATOM | 6494 | O   | ALA | A | 339 | -5.109  | 33.680 | -45.853 | 1.00 | 0.00 | B | O |
| ATOM | 6495 | N   | LEU | A | 340 | -6.184  | 34.308 | -47.737 | 1.00 | 0.00 | B | N |
| ATOM | 6496 | CA  | LEU | A | 340 | -7.314  | 33.446 | -47.525 | 1.00 | 0.00 | B | C |
| ATOM | 6497 | CB  | LEU | A | 340 | -8.375  | 33.648 | -48.627 | 1.00 | 0.00 | B | C |
| ATOM | 6498 | CG  | LEU | A | 340 | -9.773  | 33.041 | -48.367 | 1.00 | 0.00 | B | C |
| ATOM | 6499 | CD1 | LEU | A | 340 | -10.655 | 33.176 | -49.617 | 1.00 | 0.00 | B | C |
| ATOM | 6500 | CD2 | LEU | A | 340 | -9.732  | 31.606 | -47.830 | 1.00 | 0.00 | B | C |
| ATOM | 6501 | C   | LEU | A | 340 | -6.830  | 32.028 | -47.593 | 1.00 | 0.00 | B | C |
| ATOM | 6502 | O   | LEU | A | 340 | -7.145  | 31.210 | -46.730 | 1.00 | 0.00 | B | O |
| ATOM | 6503 | N   | ALA | A | 341 | -5.987  | 31.718 | -48.598 | 1.00 | 0.00 | B | N |
| ATOM | 6504 | CA  | ALA | A | 341 | -5.553  | 30.364 | -48.796 | 1.00 | 0.00 | B | C |
| ATOM | 6505 | CB  | ALA | A | 341 | -4.539  | 30.232 | -49.946 | 1.00 | 0.00 | B | C |
| ATOM | 6506 | C   | ALA | A | 341 | -4.882  | 29.891 | -47.544 | 1.00 | 0.00 | B | C |
| ATOM | 6507 | O   | ALA | A | 341 | -5.099  | 28.758 | -47.116 | 1.00 | 0.00 | B | O |
| ATOM | 6508 | N   | ALA | A | 342 | -4.040  | 30.750 | -46.940 | 1.00 | 0.00 | B | N |
| ATOM | 6509 | CA  | ALA | A | 342 | -3.309  | 30.441 | -45.740 | 1.00 | 0.00 | B | C |
| ATOM | 6510 | CB  | ALA | A | 342 | -2.263  | 31.508 | -45.398 | 1.00 | 0.00 | B | C |
| ATOM | 6511 | C   | ALA | A | 342 | -4.230  | 30.300 | -44.565 | 1.00 | 0.00 | B | C |
| ATOM | 6512 | O   | ALA | A | 342 | -3.998  | 29.475 | -43.682 | 1.00 | 0.00 | B | O |
| ATOM | 6513 | N   | GLY | A | 343 | -5.278  | 31.140 | -44.487 | 1.00 | 0.00 | B | N |
| ATOM | 6514 | CA  | GLY | A | 343 | -6.183  | 31.048 | -43.377 | 1.00 | 0.00 | B | C |
| ATOM | 6515 | C   | GLY | A | 343 | -6.881  | 29.713 | -43.406 | 1.00 | 0.00 | B | C |
| ATOM | 6516 | O   | GLY | A | 343 | -7.139  | 29.112 | -42.365 | 1.00 | 0.00 | B | O |



|      |      |     |           |         |        |         |      |      |   |   |
|------|------|-----|-----------|---------|--------|---------|------|------|---|---|
| ATOM | 6517 | N   | THR A 344 | -7.260  | 29.264 | -44.617 | 1.00 | 0.00 | B | N |
| ATOM | 6518 | CA  | THR A 344 | -8.014  | 28.069 | -44.919 | 1.00 | 0.00 | B | C |
| ATOM | 6519 | CB  | THR A 344 | -8.795  | 28.225 | -46.201 | 1.00 | 0.00 | B | C |
| ATOM | 6520 | OG1 | THR A 344 | -9.577  | 29.408 | -46.128 | 1.00 | 0.00 | B | O |
| ATOM | 6521 | CG2 | THR A 344 | -9.762  | 27.042 | -46.368 | 1.00 | 0.00 | B | C |
| ATOM | 6522 | C   | THR A 344 | -7.195  | 26.800 | -44.965 | 1.00 | 0.00 | B | C |
| ATOM | 6523 | O   | THR A 344 | -7.760  | 25.715 | -45.082 | 1.00 | 0.00 | B | O |
| ATOM | 6524 | N   | GLY A 345 | -5.848  | 26.867 | -45.007 | 1.00 | 0.00 | B | N |
| ATOM | 6525 | CA  | GLY A 345 | -5.099  | 25.639 | -45.036 | 1.00 | 0.00 | B | C |
| ATOM | 6526 | C   | GLY A 345 | -5.123  | 25.048 | -46.418 | 1.00 | 0.00 | B | C |
| ATOM | 6527 | O   | GLY A 345 | -5.091  | 23.827 | -46.574 | 1.00 | 0.00 | B | O |
| ATOM | 6528 | N   | LYS A 346 | -5.217  | 25.893 | -47.465 | 1.00 | 0.00 | B | N |
| ATOM | 6529 | CA  | LYS A 346 | -5.147  | 25.361 | -48.803 | 1.00 | 0.00 | B | C |
| ATOM | 6530 | CB  | LYS A 346 | -6.079  | 26.064 | -49.808 | 1.00 | 0.00 | B | C |
| ATOM | 6531 | CG  | LYS A 346 | -7.497  | 25.489 | -49.804 | 1.00 | 0.00 | B | C |
| ATOM | 6532 | CD  | LYS A 346 | -8.259  | 25.666 | -48.494 | 1.00 | 0.00 | B | C |
| ATOM | 6533 | CE  | LYS A 346 | -9.637  | 24.998 | -48.490 | 1.00 | 0.00 | B | C |
| ATOM | 6534 | NZ  | LYS A 346 | -10.550 | 25.701 | -49.420 | 1.00 | 0.00 | B | N |
| ATOM | 6535 | C   | LYS A 346 | -3.727  | 25.533 | -49.249 | 1.00 | 0.00 | B | C |
| ATOM | 6536 | O   | LYS A 346 | -3.395  | 26.451 | -49.994 | 1.00 | 0.00 | B | O |
| ATOM | 6537 | N   | ILE A 347 | -2.877  | 24.579 | -48.817 | 1.00 | 0.00 | B | N |
| ATOM | 6538 | CA  | ILE A 347 | -1.444  | 24.631 | -48.934 | 1.00 | 0.00 | B | C |
| ATOM | 6539 | CB  | ILE A 347 | -0.745  | 23.495 | -48.242 | 1.00 | 0.00 | B | C |
| ATOM | 6540 | CG2 | ILE A 347 | 0.756   | 23.632 | -48.556 | 1.00 | 0.00 | B | C |
| ATOM | 6541 | CG1 | ILE A 347 | -1.040  | 23.471 | -46.734 | 1.00 | 0.00 | B | C |
| ATOM | 6542 | CD  | ILE A 347 | -2.465  | 23.043 | -46.386 | 1.00 | 0.00 | B | C |
| ATOM | 6543 | C   | ILE A 347 | -0.939  | 24.581 | -50.339 | 1.00 | 0.00 | B | C |
| ATOM | 6544 | O   | ILE A 347 | -0.067  | 25.365 | -50.710 | 1.00 | 0.00 | B | O |
| ATOM | 6545 | N   | GLY A 348 | -1.462  | 23.660 | -51.165 | 1.00 | 0.00 | B | N |
| ATOM | 6546 | CA  | GLY A 348 | -0.898  | 23.480 | -52.472 | 1.00 | 0.00 | B | C |
| ATOM | 6547 | C   | GLY A 348 | -0.989  | 24.767 | -53.223 | 1.00 | 0.00 | B | C |
| ATOM | 6548 | O   | GLY A 348 | -0.072  | 25.135 | -53.954 | 1.00 | 0.00 | B | O |
| ATOM | 6549 | N   | VAL A 349 | -2.130  | 25.463 | -53.085 | 1.00 | 0.00 | B | N |
| ATOM | 6550 | CA  | VAL A 349 | -2.377  | 26.703 | -53.763 | 1.00 | 0.00 | B | C |
| ATOM | 6551 | CB  | VAL A 349 | -3.806  | 27.151 | -53.624 | 1.00 | 0.00 | B | C |
| ATOM | 6552 | CG1 | VAL A 349 | -3.983  | 28.485 | -54.369 | 1.00 | 0.00 | B | C |
| ATOM | 6553 | CG2 | VAL A 349 | -4.721  | 26.029 | -54.145 | 1.00 | 0.00 | B | C |
| ATOM | 6554 | C   | VAL A 349 | -1.494  | 27.775 | -53.204 | 1.00 | 0.00 | B | C |

|      |      |     |           |        |        |         |      |      |   |   |
|------|------|-----|-----------|--------|--------|---------|------|------|---|---|
| ATOM | 6555 | O   | VAL A 349 | -0.917 | 28.565 | -53.947 | 1.00 | 0.00 | B | O |
| ATOM | 6556 | N   | LEU A 350 | -1.353 | 27.808 | -51.865 | 1.00 | 0.00 | B | N |
| ATOM | 6557 | CA  | LEU A 350 | -0.568 | 28.825 | -51.227 | 1.00 | 0.00 | B | C |
| ATOM | 6558 | CB  | LEU A 350 | -0.527 | 28.614 | -49.700 | 1.00 | 0.00 | B | C |
| ATOM | 6559 | CG  | LEU A 350 | 0.115  | 29.732 | -48.847 | 1.00 | 0.00 | B | C |
| ATOM | 6560 | CD1 | LEU A 350 | 0.063  | 29.352 | -47.359 | 1.00 | 0.00 | B | C |
| ATOM | 6561 | CD2 | LEU A 350 | 1.541  | 30.099 | -49.289 | 1.00 | 0.00 | B | C |
| ATOM | 6562 | C   | LEU A 350 | 0.824  | 28.722 | -51.779 | 1.00 | 0.00 | B | C |
| ATOM | 6563 | O   | LEU A 350 | 1.428  | 29.723 | -52.164 | 1.00 | 0.00 | B | O |
| ATOM | 6564 | N   | ALA A 351 | 1.358  | 27.489 | -51.866 | 1.00 | 0.00 | B | N |
| ATOM | 6565 | CA  | ALA A 351 | 2.687  | 27.291 | -52.369 | 1.00 | 0.00 | B | C |
| ATOM | 6566 | CB  | ALA A 351 | 3.093  | 25.807 | -52.380 | 1.00 | 0.00 | B | C |
| ATOM | 6567 | C   | ALA A 351 | 2.729  | 27.778 | -53.783 | 1.00 | 0.00 | B | C |
| ATOM | 6568 | O   | ALA A 351 | 3.698  | 28.400 | -54.212 | 1.00 | 0.00 | B | O |
| ATOM | 6569 | N   | TYR A 352 | 1.657  | 27.498 | -54.538 | 1.00 | 0.00 | B | N |
| ATOM | 6570 | CA  | TYR A 352 | 1.547  | 27.861 | -55.920 | 1.00 | 0.00 | B | C |
| ATOM | 6571 | CB  | TYR A 352 | 0.242  | 27.310 | -56.508 | 1.00 | 0.00 | B | C |
| ATOM | 6572 | CG  | TYR A 352 | -0.113 | 28.080 | -57.727 | 1.00 | 0.00 | B | C |
| ATOM | 6573 | CD1 | TYR A 352 | 0.605  | 27.960 | -58.893 | 1.00 | 0.00 | B | C |
| ATOM | 6574 | CE1 | TYR A 352 | 0.232  | 28.679 | -60.005 | 1.00 | 0.00 | B | C |
| ATOM | 6575 | CZ  | TYR A 352 | -0.856 | 29.516 | -59.959 | 1.00 | 0.00 | B | C |
| ATOM | 6576 | OH  | TYR A 352 | -1.240 | 30.252 | -61.100 | 1.00 | 0.00 | B | O |
| ATOM | 6577 | CD2 | TYR A 352 | -1.197 | 28.921 | -57.686 | 1.00 | 0.00 | B | C |
| ATOM | 6578 | CE2 | TYR A 352 | -1.573 | 29.641 | -58.794 | 1.00 | 0.00 | B | C |
| ATOM | 6579 | C   | TYR A 352 | 1.579  | 29.347 | -56.098 | 1.00 | 0.00 | B | C |
| ATOM | 6580 | O   | TYR A 352 | 2.276  | 29.844 | -56.978 | 1.00 | 0.00 | B | O |
| ATOM | 6581 | N   | ILE A 353 | 0.831  | 30.110 | -55.282 | 1.00 | 0.00 | B | N |
| ATOM | 6582 | CA  | ILE A 353 | 0.778  | 31.530 | -55.486 | 1.00 | 0.00 | B | C |
| ATOM | 6583 | CB  | ILE A 353 | -0.279 | 32.219 | -54.671 | 1.00 | 0.00 | B | C |
| ATOM | 6584 | CG2 | ILE A 353 | -0.063 | 33.738 | -54.789 | 1.00 | 0.00 | B | C |
| ATOM | 6585 | CG1 | ILE A 353 | -1.676 | 31.764 | -55.129 | 1.00 | 0.00 | B | C |
| ATOM | 6586 | CD  | ILE A 353 | -2.808 | 32.252 | -54.224 | 1.00 | 0.00 | B | C |
| ATOM | 6587 | C   | ILE A 353 | 2.097  | 32.176 | -55.210 | 1.00 | 0.00 | B | C |
| ATOM | 6588 | O   | ILE A 353 | 2.499  | 33.081 | -55.934 | 1.00 | 0.00 | B | O |
| ATOM | 6589 | N   | LEU A 354 | 2.770  | 31.779 | -54.114 | 1.00 | 0.00 | B | N |
| ATOM | 6590 | CA  | LEU A 354 | 4.035  | 32.337 | -53.719 | 1.00 | 0.00 | B | C |
| ATOM | 6591 | CB  | LEU A 354 | 4.433  | 31.894 | -52.307 | 1.00 | 0.00 | B | C |
| ATOM | 6592 | CG  | LEU A 354 | 3.440  | 32.342 | -51.220 | 1.00 | 0.00 | B | C |

|      |      |               |        |        |         |      |      |   |   |
|------|------|---------------|--------|--------|---------|------|------|---|---|
| ATOM | 6593 | CD1 LEU A 354 | 3.877  | 31.824 | -49.842 | 1.00 | 0.00 | B | C |
| ATOM | 6594 | CD2 LEU A 354 | 3.222  | 33.862 | -51.236 | 1.00 | 0.00 | B | C |
| ATOM | 6595 | C LEU A 354   | 5.142  | 31.889 | -54.629 | 1.00 | 0.00 | B | C |
| ATOM | 6596 | O LEU A 354   | 6.095  | 32.606 | -54.886 | 1.00 | 0.00 | B | O |
| ATOM | 6597 | N GLN A 355   | 5.133  | 30.612 | -55.011 | 1.00 | 0.00 | B | N |
| ATOM | 6598 | CA GLN A 355  | 6.125  | 29.970 | -55.826 | 1.00 | 0.00 | B | C |
| ATOM | 6599 | CB GLN A 355  | 6.355  | 28.509 | -55.414 | 1.00 | 0.00 | B | C |
| ATOM | 6600 | CG GLN A 355  | 7.225  | 28.383 | -54.151 | 1.00 | 0.00 | B | C |
| ATOM | 6601 | CD GLN A 355  | 6.700  | 29.318 | -53.067 | 1.00 | 0.00 | B | C |
| ATOM | 6602 | OE1 GLN A 355 | 5.884  | 28.938 | -52.231 | 1.00 | 0.00 | B | O |
| ATOM | 6603 | NE2 GLN A 355 | 7.174  | 30.595 | -53.090 | 1.00 | 0.00 | B | N |
| ATOM | 6604 | C GLN A 355   | 5.882  | 30.061 | -57.296 | 1.00 | 0.00 | B | C |
| ATOM | 6605 | O GLN A 355   | 6.740  | 29.621 | -58.053 | 1.00 | 0.00 | B | O |
| ATOM | 6606 | N ARG A 356   | 4.683  | 30.490 | -57.742 | 1.00 | 0.00 | B | N |
| ATOM | 6607 | CA ARG A 356  | 4.316  | 30.431 | -59.135 | 1.00 | 0.00 | B | C |
| ATOM | 6608 | CB ARG A 356  | 2.883  | 30.898 | -59.429 | 1.00 | 0.00 | B | C |
| ATOM | 6609 | CG ARG A 356  | 2.539  | 30.829 | -60.917 | 1.00 | 0.00 | B | C |
| ATOM | 6610 | CD ARG A 356  | 1.391  | 31.749 | -61.337 | 1.00 | 0.00 | B | C |
| ATOM | 6611 | NE ARG A 356  | 1.867  | 33.152 | -61.167 | 1.00 | 0.00 | B | N |
| ATOM | 6612 | CZ ARG A 356  | 1.330  | 33.944 | -60.193 | 1.00 | 0.00 | B | C |
| ATOM | 6613 | NH1 ARG A 356 | 0.296  | 33.479 | -59.433 | 1.00 | 0.00 | B | N |
| ATOM | 6614 | NH2 ARG A 356 | 1.822  | 35.198 | -59.985 | 1.00 | 0.00 | B | N |
| ATOM | 6615 | C ARG A 356   | 5.164  | 31.346 | -59.955 | 1.00 | 0.00 | B | C |
| ATOM | 6616 | O ARG A 356   | 4.713  | 32.415 | -60.366 | 1.00 | 0.00 | B | O |
| ATOM | 6617 | N GLU A 357   | 6.387  | 30.894 | -60.283 | 1.00 | 0.00 | B | N |
| ATOM | 6618 | CA GLU A 357  | 7.315  | 31.652 | -61.065 | 1.00 | 0.00 | B | C |
| ATOM | 6619 | CB GLU A 357  | 8.696  | 30.989 | -61.147 | 1.00 | 0.00 | B | C |
| ATOM | 6620 | CG GLU A 357  | 8.586  | 29.620 | -61.831 | 1.00 | 0.00 | B | C |
| ATOM | 6621 | CD GLU A 357  | 9.973  | 29.053 | -62.081 | 1.00 | 0.00 | B | C |
| ATOM | 6622 | OE1 GLU A 357 | 10.767 | 28.968 | -61.108 | 1.00 | 0.00 | B | O |
| ATOM | 6623 | OE2 GLU A 357 | 10.254 | 28.692 | -63.256 | 1.00 | 0.00 | B | O |
| ATOM | 6624 | C GLU A 357   | 6.799  | 31.625 | -62.464 | 1.00 | 0.00 | B | C |
| ATOM | 6625 | O GLU A 357   | 6.226  | 30.625 | -62.896 | 1.00 | 0.00 | B | O |
| ATOM | 6626 | N ILE A 358   | 6.969  | 32.725 | -63.225 | 1.00 | 0.00 | B | N |
| ATOM | 6627 | CA ILE A 358  | 6.482  | 32.652 | -64.568 | 1.00 | 0.00 | B | C |
| ATOM | 6628 | CB ILE A 358  | 5.156  | 33.342 | -64.729 | 1.00 | 0.00 | B | C |
| ATOM | 6629 | CG2 ILE A 358 | 5.395  | 34.858 | -64.629 | 1.00 | 0.00 | B | C |
| ATOM | 6630 | CG1 ILE A 358 | 4.432  | 32.863 | -66.001 | 1.00 | 0.00 | B | C |

|      |      |     |     |   |     |        |        |         |      |      |   |   |
|------|------|-----|-----|---|-----|--------|--------|---------|------|------|---|---|
| ATOM | 6631 | CD  | ILE | A | 358 | 3.997  | 31.398 | -65.959 | 1.00 | 0.00 | B | C |
| ATOM | 6632 | C   | ILE | A | 358 | 7.518  | 33.258 | -65.472 | 1.00 | 0.00 | B | C |
| ATOM | 6633 | O   | ILE | A | 358 | 8.174  | 34.234 | -65.108 | 1.00 | 0.00 | B | O |
| ATOM | 6634 | N   | GLN | A | 359 | 7.730  | 32.666 | -66.669 | 1.00 | 0.00 | B | N |
| ATOM | 6635 | CA  | GLN | A | 359 | 8.712  | 33.212 | -67.567 | 1.00 | 0.00 | B | C |
| ATOM | 6636 | CB  | GLN | A | 359 | 9.965  | 32.333 | -67.728 | 1.00 | 0.00 | B | C |
| ATOM | 6637 | CG  | GLN | A | 359 | 11.006 | 32.930 | -68.679 | 1.00 | 0.00 | B | C |
| ATOM | 6638 | CD  | GLN | A | 359 | 11.664 | 34.124 | -67.994 | 1.00 | 0.00 | B | C |
| ATOM | 6639 | OE1 | GLN | A | 359 | 11.148 | 34.659 | -67.013 | 1.00 | 0.00 | B | O |
| ATOM | 6640 | NE2 | GLN | A | 359 | 12.837 | 34.556 | -68.527 | 1.00 | 0.00 | B | N |
| ATOM | 6641 | C   | GLN | A | 359 | 8.080  | 33.360 | -68.917 | 1.00 | 0.00 | B | C |
| ATOM | 6642 | O   | GLN | A | 359 | 7.568  | 32.398 | -69.492 | 1.00 | 0.00 | B | O |
| ATOM | 6643 | N   | GLU | A | 360 | 8.113  | 34.602 | -69.448 | 1.00 | 0.00 | B | N |
| ATOM | 6644 | CA  | GLU | A | 360 | 7.499  | 34.959 | -70.697 | 1.00 | 0.00 | B | C |
| ATOM | 6645 | CB  | GLU | A | 360 | 5.987  | 34.618 | -70.695 | 1.00 | 0.00 | B | C |
| ATOM | 6646 | CG  | GLU | A | 360 | 5.177  | 34.889 | -71.965 | 1.00 | 0.00 | B | C |
| ATOM | 6647 | CD  | GLU | A | 360 | 4.485  | 36.229 | -71.771 | 1.00 | 0.00 | B | C |
| ATOM | 6648 | OE1 | GLU | A | 360 | 4.049  | 36.503 | -70.620 | 1.00 | 0.00 | B | O |
| ATOM | 6649 | OE2 | GLU | A | 360 | 4.383  | 36.997 | -72.764 | 1.00 | 0.00 | B | O |
| ATOM | 6650 | C   | GLU | A | 360 | 7.717  | 36.444 | -70.808 | 1.00 | 0.00 | B | C |
| ATOM | 6651 | O   | GLU | A | 360 | 8.256  | 37.043 | -69.875 | 1.00 | 0.00 | B | O |
| ATOM | 6652 | N   | PRO | A | 361 | 7.334  | 37.084 | -71.882 | 1.00 | 0.00 | B | N |
| ATOM | 6653 | CD  | PRO | A | 361 | 7.433  | 36.459 | -73.194 | 1.00 | 0.00 | B | C |
| ATOM | 6654 | CA  | PRO | A | 361 | 7.602  | 38.490 | -71.977 | 1.00 | 0.00 | B | C |
| ATOM | 6655 | CB  | PRO | A | 361 | 7.254  | 38.881 | -73.408 | 1.00 | 0.00 | B | C |
| ATOM | 6656 | CG  | PRO | A | 361 | 7.619  | 37.611 | -74.199 | 1.00 | 0.00 | B | C |
| ATOM | 6657 | C   | PRO | A | 361 | 7.029  | 39.370 | -70.916 | 1.00 | 0.00 | B | C |
| ATOM | 6658 | O   | PRO | A | 361 | 7.549  | 40.452 | -70.706 | 1.00 | 0.00 | B | O |
| ATOM | 6659 | N   | GLU | A | 362 | 5.940  | 39.060 | -70.228 | 1.00 | 0.00 | B | N |
| ATOM | 6660 | CA  | GLU | A | 362 | 5.773  | 40.059 | -69.215 | 1.00 | 0.00 | B | C |
| ATOM | 6661 | CB  | GLU | A | 362 | 4.418  | 40.778 | -69.297 | 1.00 | 0.00 | B | C |
| ATOM | 6662 | CG  | GLU | A | 362 | 4.211  | 41.525 | -70.617 | 1.00 | 0.00 | B | C |
| ATOM | 6663 | CD  | GLU | A | 362 | 3.753  | 40.508 | -71.654 | 1.00 | 0.00 | B | C |
| ATOM | 6664 | OE1 | GLU | A | 362 | 2.682  | 39.883 | -71.433 | 1.00 | 0.00 | B | O |
| ATOM | 6665 | OE2 | GLU | A | 362 | 4.469  | 40.336 | -72.678 | 1.00 | 0.00 | B | O |
| ATOM | 6666 | C   | GLU | A | 362 | 5.780  | 39.299 | -67.944 | 1.00 | 0.00 | B | C |
| ATOM | 6667 | O   | GLU | A | 362 | 5.030  | 39.594 | -67.017 | 1.00 | 0.00 | B | O |
| ATOM | 6668 | N   | CYS | A | 363 | 6.633  | 38.274 | -67.870 | 1.00 | 0.00 | B | N |

|      |      |     |     |   |     |        |        |         |      |      |   |   |
|------|------|-----|-----|---|-----|--------|--------|---------|------|------|---|---|
| ATOM | 6669 | CA  | CYS | A | 363 | 6.604  | 37.411 | -66.730 | 1.00 | 0.00 | B | C |
| ATOM | 6670 | CB  | CYS | A | 363 | 7.158  | 36.014 | -66.989 | 1.00 | 0.00 | B | C |
| ATOM | 6671 | SG  | CYS | A | 363 | 5.817  | 35.014 | -67.668 | 1.00 | 0.00 | B | S |
| ATOM | 6672 | C   | CYS | A | 363 | 7.190  | 37.932 | -65.456 | 1.00 | 0.00 | B | C |
| ATOM | 6673 | O   | CYS | A | 363 | 6.674  | 37.623 | -64.385 | 1.00 | 0.00 | B | O |
| ATOM | 6674 | N   | ARG | A | 364 | 8.261  | 38.735 | -65.522 | 1.00 | 0.00 | B | N |
| ATOM | 6675 | CA  | ARG | A | 364 | 8.999  | 39.046 | -64.328 | 1.00 | 0.00 | B | C |
| ATOM | 6676 | CB  | ARG | A | 364 | 10.248 | 39.908 | -64.604 | 1.00 | 0.00 | B | C |
| ATOM | 6677 | CG  | ARG | A | 364 | 11.130 | 40.157 | -63.373 | 1.00 | 0.00 | B | C |
| ATOM | 6678 | CD  | ARG | A | 364 | 12.393 | 40.969 | -63.683 | 1.00 | 0.00 | B | C |
| ATOM | 6679 | NE  | ARG | A | 364 | 13.039 | 41.343 | -62.389 | 1.00 | 0.00 | B | N |
| ATOM | 6680 | CZ  | ARG | A | 364 | 13.949 | 40.518 | -61.792 | 1.00 | 0.00 | B | C |
| ATOM | 6681 | NH1 | ARG | A | 364 | 14.265 | 39.317 | -62.358 | 1.00 | 0.00 | B | N |
| ATOM | 6682 | NH2 | ARG | A | 364 | 14.554 | 40.900 | -60.628 | 1.00 | 0.00 | B | N |
| ATOM | 6683 | C   | ARG | A | 364 | 8.158  | 39.732 | -63.294 | 1.00 | 0.00 | B | C |
| ATOM | 6684 | O   | ARG | A | 364 | 8.262  | 39.411 | -62.113 | 1.00 | 0.00 | B | O |
| ATOM | 6685 | N   | HSD | A | 365 | 7.294  | 40.686 | -63.681 | 1.00 | 0.00 | B | N |
| ATOM | 6686 | CA  | HSD | A | 365 | 6.553  | 41.400 | -62.677 | 1.00 | 0.00 | B | C |
| ATOM | 6687 | CB  | HSD | A | 365 | 5.706  | 42.553 | -63.233 | 1.00 | 0.00 | B | C |
| ATOM | 6688 | ND1 | HSD | A | 365 | 4.510  | 41.230 | -65.014 | 1.00 | 0.00 | B | N |
| ATOM | 6689 | CG  | HSD | A | 365 | 4.478  | 42.074 | -63.932 | 1.00 | 0.00 | B | C |
| ATOM | 6690 | CE1 | HSD | A | 365 | 3.224  | 41.014 | -65.382 | 1.00 | 0.00 | B | C |
| ATOM | 6691 | NE2 | HSD | A | 365 | 2.369  | 41.661 | -64.612 | 1.00 | 0.00 | B | N |
| ATOM | 6692 | CD2 | HSD | A | 365 | 3.162  | 42.329 | -63.699 | 1.00 | 0.00 | B | C |
| ATOM | 6693 | C   | HSD | A | 365 | 5.636  | 40.455 | -61.953 | 1.00 | 0.00 | B | C |
| ATOM | 6694 | O   | HSD | A | 365 | 5.430  | 40.583 | -60.746 | 1.00 | 0.00 | B | O |
| ATOM | 6695 | N   | LEU | A | 366 | 5.036  | 39.504 | -62.690 | 1.00 | 0.00 | B | N |
| ATOM | 6696 | CA  | LEU | A | 366 | 4.085  | 38.539 | -62.189 | 1.00 | 0.00 | B | C |
| ATOM | 6697 | CB  | LEU | A | 366 | 3.448  | 37.753 | -63.354 | 1.00 | 0.00 | B | C |
| ATOM | 6698 | CG  | LEU | A | 366 | 2.358  | 36.747 | -62.949 | 1.00 | 0.00 | B | C |
| ATOM | 6699 | CD1 | LEU | A | 366 | 1.125  | 37.459 | -62.371 | 1.00 | 0.00 | B | C |
| ATOM | 6700 | CD2 | LEU | A | 366 | 2.008  | 35.812 | -64.121 | 1.00 | 0.00 | B | C |
| ATOM | 6701 | C   | LEU | A | 366 | 4.696  | 37.527 | -61.245 | 1.00 | 0.00 | B | C |
| ATOM | 6702 | O   | LEU | A | 366 | 4.097  | 37.208 | -60.216 | 1.00 | 0.00 | B | O |
| ATOM | 6703 | N   | SER | A | 367 | 5.900  | 36.999 | -61.558 | 1.00 | 0.00 | B | N |
| ATOM | 6704 | CA  | SER | A | 367 | 6.423  | 35.864 | -60.831 | 1.00 | 0.00 | B | C |
| ATOM | 6705 | CB  | SER | A | 367 | 7.548  | 35.115 | -61.569 | 1.00 | 0.00 | B | C |
| ATOM | 6706 | OG  | SER | A | 367 | 8.701  | 35.935 | -61.695 | 1.00 | 0.00 | B | O |

|      |      |     |           |        |        |         |      |      |   |   |
|------|------|-----|-----------|--------|--------|---------|------|------|---|---|
| ATOM | 6707 | C   | SER A 367 | 6.932  | 36.194 | -59.468 | 1.00 | 0.00 | B | C |
| ATOM | 6708 | O   | SER A 367 | 7.557  | 37.226 | -59.231 | 1.00 | 0.00 | B | O |
| ATOM | 6709 | N   | ARG A 368 | 6.572  | 35.329 | -58.501 | 1.00 | 0.00 | B | N |
| ATOM | 6710 | CA  | ARG A 368 | 7.046  | 35.424 | -57.159 | 1.00 | 0.00 | B | C |
| ATOM | 6711 | CB  | ARG A 368 | 5.989  | 34.946 | -56.175 | 1.00 | 0.00 | B | C |
| ATOM | 6712 | CG  | ARG A 368 | 4.645  | 35.666 | -56.318 | 1.00 | 0.00 | B | C |
| ATOM | 6713 | CD  | ARG A 368 | 4.293  | 36.565 | -55.138 | 1.00 | 0.00 | B | C |
| ATOM | 6714 | NE  | ARG A 368 | 5.576  | 36.873 | -54.462 | 1.00 | 0.00 | B | N |
| ATOM | 6715 | CZ  | ARG A 368 | 5.965  | 36.061 | -53.444 | 1.00 | 0.00 | B | C |
| ATOM | 6716 | NH1 | ARG A 368 | 5.106  | 35.110 | -52.985 | 1.00 | 0.00 | B | N |
| ATOM | 6717 | NH2 | ARG A 368 | 7.209  | 36.156 | -52.904 | 1.00 | 0.00 | B | N |
| ATOM | 6718 | C   | ARG A 368 | 8.408  | 34.783 | -56.973 | 1.00 | 0.00 | B | C |
| ATOM | 6719 | O   | ARG A 368 | 9.203  | 35.264 | -56.178 | 1.00 | 0.00 | B | O |
| ATOM | 6720 | N   | LYS A 369 | 8.757  | 33.680 | -57.673 | 1.00 | 0.00 | B | N |
| ATOM | 6721 | CA  | LYS A 369 | 10.052 | 33.103 | -57.392 | 1.00 | 0.00 | B | C |
| ATOM | 6722 | CB  | LYS A 369 | 9.976  | 31.693 | -56.776 | 1.00 | 0.00 | B | C |
| ATOM | 6723 | CG  | LYS A 369 | 9.399  | 30.620 | -57.699 | 1.00 | 0.00 | B | C |
| ATOM | 6724 | CD  | LYS A 369 | 9.598  | 29.202 | -57.158 | 1.00 | 0.00 | B | C |
| ATOM | 6725 | CE  | LYS A 369 | 9.028  | 28.107 | -58.061 | 1.00 | 0.00 | B | C |
| ATOM | 6726 | NZ  | LYS A 369 | 9.164  | 26.788 | -57.404 | 1.00 | 0.00 | B | N |
| ATOM | 6727 | C   | LYS A 369 | 10.892 | 33.013 | -58.637 | 1.00 | 0.00 | B | C |
| ATOM | 6728 | O   | LYS A 369 | 10.419 | 32.632 | -59.710 | 1.00 | 0.00 | B | O |
| ATOM | 6729 | N   | PHE A 370 | 12.189 | 33.373 | -58.500 | 1.00 | 0.00 | B | N |
| ATOM | 6730 | CA  | PHE A 370 | 13.131 | 33.338 | -59.585 | 1.00 | 0.00 | B | C |
| ATOM | 6731 | CB  | PHE A 370 | 13.818 | 34.694 | -59.803 | 1.00 | 0.00 | B | C |
| ATOM | 6732 | CG  | PHE A 370 | 12.781 | 35.754 | -59.964 | 1.00 | 0.00 | B | C |
| ATOM | 6733 | CD1 | PHE A 370 | 12.053 | 36.170 | -58.875 | 1.00 | 0.00 | B | C |
| ATOM | 6734 | CE1 | PHE A 370 | 11.099 | 37.152 | -58.995 | 1.00 | 0.00 | B | C |
| ATOM | 6735 | CZ  | PHE A 370 | 10.867 | 37.736 | -60.218 | 1.00 | 0.00 | B | C |
| ATOM | 6736 | CD2 | PHE A 370 | 12.552 | 36.350 | -61.183 | 1.00 | 0.00 | B | C |
| ATOM | 6737 | CE2 | PHE A 370 | 11.598 | 37.331 | -61.309 | 1.00 | 0.00 | B | C |
| ATOM | 6738 | C   | PHE A 370 | 14.245 | 32.444 | -59.130 | 1.00 | 0.00 | B | C |
| ATOM | 6739 | O   | PHE A 370 | 14.787 | 32.650 | -58.051 | 1.00 | 0.00 | B | O |
| ATOM | 6740 | N   | THR A 371 | 14.636 | 31.426 | -59.918 | 1.00 | 0.00 | B | N |
| ATOM | 6741 | CA  | THR A 371 | 15.718 | 30.605 | -59.449 | 1.00 | 0.00 | B | C |
| ATOM | 6742 | CB  | THR A 371 | 15.250 | 29.265 | -58.959 | 1.00 | 0.00 | B | C |
| ATOM | 6743 | OG1 | THR A 371 | 14.773 | 28.471 | -60.036 | 1.00 | 0.00 | B | O |
| ATOM | 6744 | CG2 | THR A 371 | 14.088 | 29.513 | -57.987 | 1.00 | 0.00 | B | C |

|      |      |     |     |       |        |        |         |      |      |   |   |
|------|------|-----|-----|-------|--------|--------|---------|------|------|---|---|
| ATOM | 6745 | C   | THR | A 371 | 16.622 | 30.343 | -60.614 | 1.00 | 0.00 | B | C |
| ATOM | 6746 | O   | THR | A 371 | 16.153 | 29.909 | -61.665 | 1.00 | 0.00 | B | O |
| ATOM | 6747 | N   | GLU | A 372 | 17.940 | 30.614 | -60.487 | 1.00 | 0.00 | B | N |
| ATOM | 6748 | CA  | GLU | A 372 | 18.761 | 30.269 | -61.613 | 1.00 | 0.00 | B | C |
| ATOM | 6749 | CB  | GLU | A 372 | 18.802 | 31.348 | -62.711 | 1.00 | 0.00 | B | C |
| ATOM | 6750 | CG  | GLU | A 372 | 17.478 | 31.502 | -63.457 | 1.00 | 0.00 | B | C |
| ATOM | 6751 | CD  | GLU | A 372 | 17.686 | 32.478 | -64.602 | 1.00 | 0.00 | B | C |
| ATOM | 6752 | OE1 | GLU | A 372 | 18.866 | 32.705 | -64.978 | 1.00 | 0.00 | B | O |
| ATOM | 6753 | OE2 | GLU | A 372 | 16.665 | 33.005 | -65.120 | 1.00 | 0.00 | B | O |
| ATOM | 6754 | C   | GLU | A 372 | 20.181 | 30.006 | -61.196 | 1.00 | 0.00 | B | C |
| ATOM | 6755 | O   | GLU | A 372 | 21.025 | 30.901 | -61.241 | 1.00 | 0.00 | B | O |
| ATOM | 6756 | N   | TRP | A 373 | 20.480 | 28.756 | -60.788 | 1.00 | 0.00 | B | N |
| ATOM | 6757 | CA  | TRP | A 373 | 21.819 | 28.326 | -60.493 | 1.00 | 0.00 | B | C |
| ATOM | 6758 | CB  | TRP | A 373 | 22.310 | 28.684 | -59.074 | 1.00 | 0.00 | B | C |
| ATOM | 6759 | CG  | TRP | A 373 | 22.727 | 30.120 | -58.840 | 1.00 | 0.00 | B | C |
| ATOM | 6760 | CD1 | TRP | A 373 | 21.967 | 31.242 | -58.683 | 1.00 | 0.00 | B | C |
| ATOM | 6761 | NE1 | TRP | A 373 | 22.777 | 32.329 | -58.443 | 1.00 | 0.00 | B | N |
| ATOM | 6762 | CE2 | TRP | A 373 | 24.091 | 31.903 | -58.439 | 1.00 | 0.00 | B | C |
| ATOM | 6763 | CD2 | TRP | A 373 | 24.094 | 30.531 | -58.685 | 1.00 | 0.00 | B | C |
| ATOM | 6764 | CE3 | TRP | A 373 | 25.260 | 29.820 | -58.739 | 1.00 | 0.00 | B | C |
| ATOM | 6765 | CZ3 | TRP | A 373 | 26.435 | 30.514 | -58.542 | 1.00 | 0.00 | B | C |
| ATOM | 6766 | CZ2 | TRP | A 373 | 25.255 | 32.588 | -58.244 | 1.00 | 0.00 | B | C |
| ATOM | 6767 | CH2 | TRP | A 373 | 26.432 | 31.872 | -58.301 | 1.00 | 0.00 | B | C |
| ATOM | 6768 | C   | TRP | A 373 | 21.791 | 26.832 | -60.552 | 1.00 | 0.00 | B | C |
| ATOM | 6769 | O   | TRP | A 373 | 21.200 | 26.187 | -59.691 | 1.00 | 0.00 | B | O |
| ATOM | 6770 | N   | ALA | A 374 | 22.432 | 26.199 | -61.551 | 1.00 | 0.00 | B | N |
| ATOM | 6771 | CA  | ALA | A 374 | 22.317 | 24.767 | -61.499 | 1.00 | 0.00 | B | C |
| ATOM | 6772 | CB  | ALA | A 374 | 21.176 | 24.207 | -62.369 | 1.00 | 0.00 | B | C |
| ATOM | 6773 | C   | ALA | A 374 | 23.576 | 24.126 | -61.979 | 1.00 | 0.00 | B | C |
| ATOM | 6774 | O   | ALA | A 374 | 24.143 | 24.521 | -62.997 | 1.00 | 0.00 | B | O |
| ATOM | 6775 | N   | TYR | A 375 | 24.059 | 23.116 | -61.225 | 1.00 | 0.00 | B | N |
| ATOM | 6776 | CA  | TYR | A 375 | 25.210 | 22.376 | -61.656 | 1.00 | 0.00 | B | C |
| ATOM | 6777 | CB  | TYR | A 375 | 26.452 | 22.585 | -60.776 | 1.00 | 0.00 | B | C |
| ATOM | 6778 | CG  | TYR | A 375 | 27.633 | 22.190 | -61.596 | 1.00 | 0.00 | B | C |
| ATOM | 6779 | CD1 | TYR | A 375 | 28.118 | 23.014 | -62.586 | 1.00 | 0.00 | B | C |
| ATOM | 6780 | CE1 | TYR | A 375 | 29.207 | 22.640 | -63.339 | 1.00 | 0.00 | B | C |
| ATOM | 6781 | CZ  | TYR | A 375 | 29.824 | 21.435 | -63.103 | 1.00 | 0.00 | B | C |
| ATOM | 6782 | OH  | TYR | A 375 | 30.942 | 21.046 | -63.873 | 1.00 | 0.00 | B | O |

|      |      |               |        |        |         |      |      |   |   |
|------|------|---------------|--------|--------|---------|------|------|---|---|
| ATOM | 6783 | CD2 TYR A 375 | 28.263 | 20.987 | -61.367 | 1.00 | 0.00 | B | C |
| ATOM | 6784 | CE2 TYR A 375 | 29.351 | 20.610 | -62.116 | 1.00 | 0.00 | B | C |
| ATOM | 6785 | C TYR A 375   | 24.903 | 20.917 | -61.593 | 1.00 | 0.00 | B | C |
| ATOM | 6786 | O TYR A 375   | 24.957 | 20.323 | -60.519 | 1.00 | 0.00 | B | O |
| ATOM | 6787 | N GLY A 376   | 24.494 | 20.321 | -62.728 | 1.00 | 0.00 | B | N |
| ATOM | 6788 | CA GLY A 376  | 24.369 | 18.898 | -62.834 | 1.00 | 0.00 | B | C |
| ATOM | 6789 | C GLY A 376   | 23.285 | 18.435 | -61.917 | 1.00 | 0.00 | B | C |
| ATOM | 6790 | O GLY A 376   | 22.098 | 18.369 | -62.230 | 1.00 | 0.00 | B | O |
| ATOM | 6791 | N PRO A 377   | 23.806 | 18.031 | -60.792 | 1.00 | 0.00 | B | N |
| ATOM | 6792 | CD PRO A 377  | 25.147 | 17.477 | -60.801 | 1.00 | 0.00 | B | C |
| ATOM | 6793 | CA PRO A 377  | 23.038 | 17.553 | -59.670 | 1.00 | 0.00 | B | C |
| ATOM | 6794 | CB PRO A 377  | 23.937 | 16.568 | -58.927 | 1.00 | 0.00 | B | C |
| ATOM | 6795 | CG PRO A 377  | 25.358 | 16.926 | -59.387 | 1.00 | 0.00 | B | C |
| ATOM | 6796 | C PRO A 377   | 22.513 | 18.609 | -58.751 | 1.00 | 0.00 | B | C |
| ATOM | 6797 | O PRO A 377   | 21.684 | 18.273 | -57.907 | 1.00 | 0.00 | B | O |
| ATOM | 6798 | N VAL A 378   | 22.974 | 19.872 | -58.867 | 1.00 | 0.00 | B | N |
| ATOM | 6799 | CA VAL A 378  | 22.632 | 20.836 | -57.858 | 1.00 | 0.00 | B | C |
| ATOM | 6800 | CB VAL A 378  | 23.825 | 21.601 | -57.354 | 1.00 | 0.00 | B | C |
| ATOM | 6801 | CG1 VAL A 378 | 24.401 | 22.439 | -58.504 | 1.00 | 0.00 | B | C |
| ATOM | 6802 | CG2 VAL A 378 | 23.413 | 22.429 | -56.125 | 1.00 | 0.00 | B | C |
| ATOM | 6803 | C VAL A 378   | 21.625 | 21.807 | -58.383 | 1.00 | 0.00 | B | C |
| ATOM | 6804 | O VAL A 378   | 21.421 | 21.926 | -59.589 | 1.00 | 0.00 | B | O |
| ATOM | 6805 | N HSD A 379   | 20.927 | 22.502 | -57.461 | 1.00 | 0.00 | B | N |
| ATOM | 6806 | CA HSD A 379  | 19.907 | 23.419 | -57.874 | 1.00 | 0.00 | B | C |
| ATOM | 6807 | CB HSD A 379  | 18.531 | 22.737 | -57.942 | 1.00 | 0.00 | B | C |
| ATOM | 6808 | ND1 HSD A 379 | 16.625 | 24.414 | -57.831 | 1.00 | 0.00 | B | N |
| ATOM | 6809 | CG HSD A 379  | 17.454 | 23.578 | -58.545 | 1.00 | 0.00 | B | C |
| ATOM | 6810 | CE1 HSD A 379 | 15.779 | 24.984 | -58.725 | 1.00 | 0.00 | B | C |
| ATOM | 6811 | NE2 HSD A 379 | 16.006 | 24.575 | -59.961 | 1.00 | 0.00 | B | N |
| ATOM | 6812 | CD2 HSD A 379 | 17.064 | 23.689 | -59.845 | 1.00 | 0.00 | B | C |
| ATOM | 6813 | C HSD A 379   | 19.824 | 24.522 | -56.859 | 1.00 | 0.00 | B | C |
| ATOM | 6814 | O HSD A 379   | 20.171 | 24.337 | -55.695 | 1.00 | 0.00 | B | O |
| ATOM | 6815 | N SER A 380   | 19.376 | 25.718 | -57.295 | 1.00 | 0.00 | B | N |
| ATOM | 6816 | CA SER A 380  | 19.219 | 26.832 | -56.404 | 1.00 | 0.00 | B | C |
| ATOM | 6817 | CB SER A 380  | 20.247 | 27.955 | -56.618 | 1.00 | 0.00 | B | C |
| ATOM | 6818 | OG SER A 380  | 20.007 | 29.013 | -55.703 | 1.00 | 0.00 | B | O |
| ATOM | 6819 | C SER A 380   | 17.878 | 27.427 | -56.687 | 1.00 | 0.00 | B | C |
| ATOM | 6820 | O SER A 380   | 17.434 | 27.459 | -57.832 | 1.00 | 0.00 | B | O |



|      |      |     |           |        |        |         |      |      |   |   |
|------|------|-----|-----------|--------|--------|---------|------|------|---|---|
| ATOM | 6821 | N   | SER A 381 | 17.185 | 27.914 | -55.641 | 1.00 | 0.00 | B | N |
| ATOM | 6822 | CA  | SER A 381 | 15.897 | 28.492 | -55.886 | 1.00 | 0.00 | B | C |
| ATOM | 6823 | CB  | SER A 381 | 14.750 | 27.596 | -55.378 | 1.00 | 0.00 | B | C |
| ATOM | 6824 | OG  | SER A 381 | 13.484 | 28.186 | -55.626 | 1.00 | 0.00 | B | O |
| ATOM | 6825 | C   | SER A 381 | 15.832 | 29.789 | -55.149 | 1.00 | 0.00 | B | C |
| ATOM | 6826 | O   | SER A 381 | 16.330 | 29.896 | -54.031 | 1.00 | 0.00 | B | O |
| ATOM | 6827 | N   | LEU A 382 | 15.246 | 30.831 | -55.774 | 1.00 | 0.00 | B | N |
| ATOM | 6828 | CA  | LEU A 382 | 15.085 | 32.062 | -55.058 | 1.00 | 0.00 | B | C |
| ATOM | 6829 | CB  | LEU A 382 | 15.828 | 33.296 | -55.615 | 1.00 | 0.00 | B | C |
| ATOM | 6830 | CG  | LEU A 382 | 17.360 | 33.236 | -55.463 | 1.00 | 0.00 | B | C |
| ATOM | 6831 | CD1 | LEU A 382 | 17.963 | 32.095 | -56.296 | 1.00 | 0.00 | B | C |
| ATOM | 6832 | CD2 | LEU A 382 | 18.001 | 34.600 | -55.759 | 1.00 | 0.00 | B | C |
| ATOM | 6833 | C   | LEU A 382 | 13.628 | 32.374 | -54.989 | 1.00 | 0.00 | B | C |
| ATOM | 6834 | O   | LEU A 382 | 12.863 | 32.080 | -55.910 | 1.00 | 0.00 | B | O |
| ATOM | 6835 | N   | TYR A 383 | 13.213 | 32.972 | -53.854 | 1.00 | 0.00 | B | N |
| ATOM | 6836 | CA  | TYR A 383 | 11.830 | 33.287 | -53.632 | 1.00 | 0.00 | B | C |
| ATOM | 6837 | CB  | TYR A 383 | 11.261 | 32.537 | -52.428 | 1.00 | 0.00 | B | C |
| ATOM | 6838 | CG  | TYR A 383 | 11.323 | 31.098 | -52.819 | 1.00 | 0.00 | B | C |
| ATOM | 6839 | CD1 | TYR A 383 | 12.522 | 30.424 | -52.785 | 1.00 | 0.00 | B | C |
| ATOM | 6840 | CE1 | TYR A 383 | 12.597 | 29.101 | -53.154 | 1.00 | 0.00 | B | C |
| ATOM | 6841 | CZ  | TYR A 383 | 11.472 | 28.433 | -53.569 | 1.00 | 0.00 | B | C |
| ATOM | 6842 | OH  | TYR A 383 | 11.552 | 27.074 | -53.943 | 1.00 | 0.00 | B | O |
| ATOM | 6843 | CD2 | TYR A 383 | 10.202 | 30.428 | -53.260 | 1.00 | 0.00 | B | C |
| ATOM | 6844 | CE2 | TYR A 383 | 10.273 | 29.102 | -53.627 | 1.00 | 0.00 | B | C |
| ATOM | 6845 | C   | TYR A 383 | 11.738 | 34.771 | -53.438 | 1.00 | 0.00 | B | C |
| ATOM | 6846 | O   | TYR A 383 | 12.624 | 35.386 | -52.851 | 1.00 | 0.00 | B | O |
| ATOM | 6847 | N   | ASP A 384 | 10.656 | 35.394 | -53.953 | 1.00 | 0.00 | B | N |
| ATOM | 6848 | CA  | ASP A 384 | 10.591 | 36.831 | -53.968 | 1.00 | 0.00 | B | C |
| ATOM | 6849 | CB  | ASP A 384 | 9.254  | 37.382 | -54.488 | 1.00 | 0.00 | B | C |
| ATOM | 6850 | CG  | ASP A 384 | 9.390  | 38.854 | -54.820 | 1.00 | 0.00 | B | C |
| ATOM | 6851 | OD1 | ASP A 384 | 10.543 | 39.354 | -54.891 | 1.00 | 0.00 | B | O |
| ATOM | 6852 | OD2 | ASP A 384 | 8.325  | 39.496 | -55.022 | 1.00 | 0.00 | B | O |
| ATOM | 6853 | C   | ASP A 384 | 10.664 | 37.292 | -52.587 | 1.00 | 0.00 | B | C |
| ATOM | 6854 | O   | ASP A 384 | 11.562 | 38.032 | -52.189 | 1.00 | 0.00 | B | O |
| ATOM | 6855 | N   | LEU A 385 | 9.670  | 36.758 | -51.883 | 1.00 | 0.00 | B | N |
| ATOM | 6856 | CA  | LEU A 385 | 9.272  | 36.757 | -50.547 | 1.00 | 0.00 | B | C |
| ATOM | 6857 | CB  | LEU A 385 | 10.457 | 36.741 | -49.571 | 1.00 | 0.00 | B | C |
| ATOM | 6858 | CG  | LEU A 385 | 10.101 | 36.106 | -48.218 | 1.00 | 0.00 | B | C |

|      |      |               |        |        |         |      |      |   |   |
|------|------|---------------|--------|--------|---------|------|------|---|---|
| ATOM | 6859 | CD1 LEU A 385 | 11.105 | 36.502 | -47.130 | 1.00 | 0.00 | B | C |
| ATOM | 6860 | CD2 LEU A 385 | 8.632  | 36.282 | -47.849 | 1.00 | 0.00 | B | C |
| ATOM | 6861 | C LEU A 385   | 8.383  | 37.931 | -50.270 | 1.00 | 0.00 | B | C |
| ATOM | 6862 | O LEU A 385   | 8.788  | 38.886 | -49.607 | 1.00 | 0.00 | B | O |
| ATOM | 6863 | N SER A 386   | 7.134  | 37.873 | -50.775 | 1.00 | 0.00 | B | N |
| ATOM | 6864 | CA SER A 386  | 6.132  | 38.866 | -50.509 | 1.00 | 0.00 | B | C |
| ATOM | 6865 | CB SER A 386  | 4.953  | 38.803 | -51.499 | 1.00 | 0.00 | B | C |
| ATOM | 6866 | OG SER A 386  | 4.234  | 37.590 | -51.338 | 1.00 | 0.00 | B | O |
| ATOM | 6867 | C SER A 386   | 5.569  | 38.645 | -49.132 | 1.00 | 0.00 | B | C |
| ATOM | 6868 | O SER A 386   | 5.225  | 39.591 | -48.430 | 1.00 | 0.00 | B | O |
| ATOM | 6869 | N CYS A 387   | 5.518  | 37.372 | -48.702 | 1.00 | 0.00 | B | N |
| ATOM | 6870 | CA CYS A 387  | 4.888  | 36.927 | -47.485 | 1.00 | 0.00 | B | C |
| ATOM | 6871 | CB CYS A 387  | 5.254  | 35.464 | -47.213 | 1.00 | 0.00 | B | C |
| ATOM | 6872 | SG CYS A 387  | 5.026  | 34.425 | -48.680 | 1.00 | 0.00 | B | S |
| ATOM | 6873 | C CYS A 387   | 5.470  | 37.659 | -46.325 | 1.00 | 0.00 | B | C |
| ATOM | 6874 | O CYS A 387   | 4.758  | 38.150 | -45.452 | 1.00 | 0.00 | B | O |
| ATOM | 6875 | N ILE A 388   | 6.804  | 37.726 | -46.282 | 1.00 | 0.00 | B | N |
| ATOM | 6876 | CA ILE A 388  | 7.515  | 38.376 | -45.230 | 1.00 | 0.00 | B | C |
| ATOM | 6877 | CB ILE A 388  | 9.005  | 38.264 | -45.369 | 1.00 | 0.00 | B | C |
| ATOM | 6878 | CG2 ILE A 388 | 9.410  | 38.891 | -46.715 | 1.00 | 0.00 | B | C |
| ATOM | 6879 | CG1 ILE A 388 | 9.699  | 38.901 | -44.153 | 1.00 | 0.00 | B | C |
| ATOM | 6880 | CD ILE A 388  | 9.413  | 38.188 | -42.832 | 1.00 | 0.00 | B | C |
| ATOM | 6881 | C ILE A 388   | 7.159  | 39.822 | -45.275 | 1.00 | 0.00 | B | C |
| ATOM | 6882 | O ILE A 388   | 7.034  | 40.468 | -44.240 | 1.00 | 0.00 | B | O |
| ATOM | 6883 | N ASP A 389   | 7.006  | 40.362 | -46.497 | 1.00 | 0.00 | B | N |
| ATOM | 6884 | CA ASP A 389  | 6.757  | 41.757 | -46.694 | 1.00 | 0.00 | B | C |
| ATOM | 6885 | CB ASP A 389  | 6.736  | 42.150 | -48.181 | 1.00 | 0.00 | B | C |
| ATOM | 6886 | CG ASP A 389  | 8.154  | 42.042 | -48.728 | 1.00 | 0.00 | B | C |
| ATOM | 6887 | OD1 ASP A 389 | 9.110  | 42.346 | -47.966 | 1.00 | 0.00 | B | O |
| ATOM | 6888 | OD2 ASP A 389 | 8.298  | 41.651 | -49.916 | 1.00 | 0.00 | B | O |
| ATOM | 6889 | C ASP A 389   | 5.446  | 42.183 | -46.106 | 1.00 | 0.00 | B | C |
| ATOM | 6890 | O ASP A 389   | 5.381  | 43.236 | -45.476 | 1.00 | 0.00 | B | O |
| ATOM | 6891 | N THR A 390   | 4.359  | 41.399 | -46.262 | 1.00 | 0.00 | B | N |
| ATOM | 6892 | CA THR A 390  | 3.120  | 41.972 | -45.826 | 1.00 | 0.00 | B | C |
| ATOM | 6893 | CB THR A 390  | 1.908  | 41.255 | -46.344 | 1.00 | 0.00 | B | C |
| ATOM | 6894 | OG1 THR A 390 | 2.028  | 41.068 | -47.747 | 1.00 | 0.00 | B | O |
| ATOM | 6895 | CG2 THR A 390 | 0.695  | 42.174 | -46.109 | 1.00 | 0.00 | B | C |
| ATOM | 6896 | C THR A 390   | 3.108  | 42.059 | -44.325 | 1.00 | 0.00 | B | C |

|      |      |     |           |        |        |         |      |      |   |   |
|------|------|-----|-----------|--------|--------|---------|------|------|---|---|
| ATOM | 6897 | O   | THR A 390 | 3.248  | 41.048 | -43.643 | 1.00 | 0.00 | B | O |
| ATOM | 6898 | N   | CYS A 391 | 3.210  | 43.292 | -43.768 | 1.00 | 0.00 | B | N |
| ATOM | 6899 | CA  | CYS A 391 | 3.059  | 43.516 | -42.349 | 1.00 | 0.00 | B | C |
| ATOM | 6900 | CB  | CYS A 391 | 4.055  | 44.556 | -41.811 | 1.00 | 0.00 | B | C |
| ATOM | 6901 | SG  | CYS A 391 | 3.916  | 44.771 | -40.010 | 1.00 | 0.00 | B | S |
| ATOM | 6902 | C   | CYS A 391 | 1.697  | 43.930 | -41.849 | 1.00 | 0.00 | B | C |
| ATOM | 6903 | O   | CYS A 391 | 1.110  | 43.295 | -40.974 | 1.00 | 0.00 | B | O |
| ATOM | 6904 | N   | GLU A 392 | 1.148  | 45.024 | -42.435 | 1.00 | 0.00 | B | N |
| ATOM | 6905 | CA  | GLU A 392 | -0.011 | 45.706 | -41.909 | 1.00 | 0.00 | B | C |
| ATOM | 6906 | CB  | GLU A 392 | -0.364 | 46.947 | -42.748 | 1.00 | 0.00 | B | C |
| ATOM | 6907 | CG  | GLU A 392 | -1.469 | 47.821 | -42.159 | 1.00 | 0.00 | B | C |
| ATOM | 6908 | CD  | GLU A 392 | -1.671 | 48.985 | -43.118 | 1.00 | 0.00 | B | C |
| ATOM | 6909 | OE1 | GLU A 392 | -1.357 | 48.813 | -44.326 | 1.00 | 0.00 | B | O |
| ATOM | 6910 | OE2 | GLU A 392 | -2.139 | 50.064 | -42.659 | 1.00 | 0.00 | B | O |
| ATOM | 6911 | C   | GLU A 392 | -1.175 | 44.787 | -41.928 | 1.00 | 0.00 | B | C |
| ATOM | 6912 | O   | GLU A 392 | -1.914 | 44.658 | -40.951 | 1.00 | 0.00 | B | O |
| ATOM | 6913 | N   | LYS A 393 | -1.356 | 44.121 | -43.073 | 1.00 | 0.00 | B | N |
| ATOM | 6914 | CA  | LYS A 393 | -2.379 | 43.144 | -43.209 | 1.00 | 0.00 | B | C |
| ATOM | 6915 | CB  | LYS A 393 | -2.696 | 42.876 | -44.687 | 1.00 | 0.00 | B | C |
| ATOM | 6916 | CG  | LYS A 393 | -3.251 | 44.149 | -45.336 | 1.00 | 0.00 | B | C |
| ATOM | 6917 | CD  | LYS A 393 | -3.186 | 44.200 | -46.864 | 1.00 | 0.00 | B | C |
| ATOM | 6918 | CE  | LYS A 393 | -3.701 | 45.527 | -47.429 | 1.00 | 0.00 | B | C |
| ATOM | 6919 | NZ  | LYS A 393 | -3.468 | 45.593 | -48.888 | 1.00 | 0.00 | B | N |
| ATOM | 6920 | C   | LYS A 393 | -1.826 | 41.929 | -42.540 | 1.00 | 0.00 | B | C |
| ATOM | 6921 | O   | LYS A 393 | -0.628 | 41.868 | -42.271 | 1.00 | 0.00 | B | O |
| ATOM | 6922 | N   | ASN A 394 | -2.687 | 40.949 | -42.207 | 1.00 | 0.00 | B | N |
| ATOM | 6923 | CA  | ASN A 394 | -2.187 | 39.790 | -41.527 | 1.00 | 0.00 | B | C |
| ATOM | 6924 | CB  | ASN A 394 | -3.277 | 38.743 | -41.246 | 1.00 | 0.00 | B | C |
| ATOM | 6925 | CG  | ASN A 394 | -4.181 | 39.319 | -40.168 | 1.00 | 0.00 | B | C |
| ATOM | 6926 | OD1 | ASN A 394 | -5.351 | 39.607 | -40.405 | 1.00 | 0.00 | B | O |
| ATOM | 6927 | ND2 | ASN A 394 | -3.615 | 39.505 | -38.944 | 1.00 | 0.00 | B | N |
| ATOM | 6928 | C   | ASN A 394 | -1.159 | 39.172 | -42.412 | 1.00 | 0.00 | B | C |
| ATOM | 6929 | O   | ASN A 394 | -0.093 | 38.813 | -41.935 | 1.00 | 0.00 | B | O |
| ATOM | 6930 | N   | SER A 395 | -1.440 | 39.017 | -43.718 | 1.00 | 0.00 | B | N |
| ATOM | 6931 | CA  | SER A 395 | -0.439 | 38.569 | -44.655 | 1.00 | 0.00 | B | C |
| ATOM | 6932 | CB  | SER A 395 | 0.955  | 39.154 | -44.406 | 1.00 | 0.00 | B | C |
| ATOM | 6933 | OG  | SER A 395 | 0.775  | 40.476 | -43.927 | 1.00 | 0.00 | B | O |
| ATOM | 6934 | C   | SER A 395 | -0.345 | 37.077 | -44.631 | 1.00 | 0.00 | B | C |

|      |      |     |           |        |        |         |      |      |   |   |
|------|------|-----|-----------|--------|--------|---------|------|------|---|---|
| ATOM | 6935 | O   | SER A 395 | -0.914 | 36.416 | -43.765 | 1.00 | 0.00 | B | O |
| ATOM | 6936 | N   | VAL A 396 | 0.346  | 36.505 | -45.636 | 1.00 | 0.00 | B | N |
| ATOM | 6937 | CA  | VAL A 396 | 0.494  | 35.081 | -45.658 | 1.00 | 0.00 | B | C |
| ATOM | 6938 | CB  | VAL A 396 | 0.962  | 34.546 | -46.978 | 1.00 | 0.00 | B | C |
| ATOM | 6939 | CG1 | VAL A 396 | 2.353  | 35.097 | -47.275 | 1.00 | 0.00 | B | C |
| ATOM | 6940 | CG2 | VAL A 396 | 0.869  | 33.011 | -46.947 | 1.00 | 0.00 | B | C |
| ATOM | 6941 | C   | VAL A 396 | 1.395  | 34.650 | -44.536 | 1.00 | 0.00 | B | C |
| ATOM | 6942 | O   | VAL A 396 | 1.130  | 33.653 | -43.868 | 1.00 | 0.00 | B | O |
| ATOM | 6943 | N   | LEU A 397 | 2.494  | 35.390 | -44.297 | 1.00 | 0.00 | B | N |
| ATOM | 6944 | CA  | LEU A 397 | 3.396  | 35.024 | -43.238 | 1.00 | 0.00 | B | C |
| ATOM | 6945 | CB  | LEU A 397 | 4.690  | 35.851 | -43.224 | 1.00 | 0.00 | B | C |
| ATOM | 6946 | CG  | LEU A 397 | 5.642  | 35.447 | -42.082 | 1.00 | 0.00 | B | C |
| ATOM | 6947 | CD1 | LEU A 397 | 6.062  | 33.973 | -42.205 | 1.00 | 0.00 | B | C |
| ATOM | 6948 | CD2 | LEU A 397 | 6.845  | 36.399 | -41.994 | 1.00 | 0.00 | B | C |
| ATOM | 6949 | C   | LEU A 397 | 2.734  | 35.196 | -41.905 | 1.00 | 0.00 | B | C |
| ATOM | 6950 | O   | LEU A 397 | 2.840  | 34.322 | -41.049 | 1.00 | 0.00 | B | O |
| ATOM | 6951 | N   | GLU A 398 | 2.029  | 36.322 | -41.659 | 1.00 | 0.00 | B | N |
| ATOM | 6952 | CA  | GLU A 398 | 1.488  | 36.399 | -40.334 | 1.00 | 0.00 | B | C |
| ATOM | 6953 | CB  | GLU A 398 | 1.064  | 37.760 | -39.760 | 1.00 | 0.00 | B | C |
| ATOM | 6954 | CG  | GLU A 398 | 2.227  | 38.710 | -39.466 | 1.00 | 0.00 | B | C |
| ATOM | 6955 | CD  | GLU A 398 | 2.622  | 39.404 | -40.760 | 1.00 | 0.00 | B | C |
| ATOM | 6956 | OE1 | GLU A 398 | 1.861  | 40.306 | -41.204 | 1.00 | 0.00 | B | O |
| ATOM | 6957 | OE2 | GLU A 398 | 3.689  | 39.043 | -41.324 | 1.00 | 0.00 | B | O |
| ATOM | 6958 | C   | GLU A 398 | 0.385  | 35.417 | -40.152 | 1.00 | 0.00 | B | C |
| ATOM | 6959 | O   | GLU A 398 | 0.206  | 34.905 | -39.050 | 1.00 | 0.00 | B | O |
| ATOM | 6960 | N   | VAL A 399 | -0.404 | 35.126 | -41.205 | 1.00 | 0.00 | B | N |
| ATOM | 6961 | CA  | VAL A 399 | -1.463 | 34.182 | -41.009 | 1.00 | 0.00 | B | C |
| ATOM | 6962 | CB  | VAL A 399 | -2.373 | 34.028 | -42.192 | 1.00 | 0.00 | B | C |
| ATOM | 6963 | CG1 | VAL A 399 | -3.083 | 35.372 | -42.430 | 1.00 | 0.00 | B | C |
| ATOM | 6964 | CG2 | VAL A 399 | -1.561 | 33.549 | -43.396 | 1.00 | 0.00 | B | C |
| ATOM | 6965 | C   | VAL A 399 | -0.855 | 32.856 | -40.661 | 1.00 | 0.00 | B | C |
| ATOM | 6966 | O   | VAL A 399 | -1.360 | 32.148 | -39.792 | 1.00 | 0.00 | B | O |
| ATOM | 6967 | N   | ILE A 400 | 0.261  | 32.484 | -41.313 | 1.00 | 0.00 | B | N |
| ATOM | 6968 | CA  | ILE A 400 | 0.836  | 31.209 | -40.996 | 1.00 | 0.00 | B | C |
| ATOM | 6969 | CB  | ILE A 400 | 1.996  | 30.796 | -41.851 | 1.00 | 0.00 | B | C |
| ATOM | 6970 | CG2 | ILE A 400 | 3.221  | 31.656 | -41.514 | 1.00 | 0.00 | B | C |
| ATOM | 6971 | CG1 | ILE A 400 | 2.250  | 29.300 | -41.634 | 1.00 | 0.00 | B | C |
| ATOM | 6972 | CD  | ILE A 400 | 3.292  | 28.732 | -42.583 | 1.00 | 0.00 | B | C |

|      |      |     |           |        |        |         |      |      |   |   |
|------|------|-----|-----------|--------|--------|---------|------|------|---|---|
| ATOM | 6973 | C   | ILE A 400 | 1.298  | 31.214 | -39.568 | 1.00 | 0.00 | B | C |
| ATOM | 6974 | O   | ILE A 400 | 1.152  | 30.219 | -38.859 | 1.00 | 0.00 | B | O |
| ATOM | 6975 | N   | ALA A 401 | 1.893  | 32.331 | -39.113 | 1.00 | 0.00 | B | N |
| ATOM | 6976 | CA  | ALA A 401 | 2.396  | 32.407 | -37.769 | 1.00 | 0.00 | B | C |
| ATOM | 6977 | CB  | ALA A 401 | 3.047  | 33.757 | -37.457 | 1.00 | 0.00 | B | C |
| ATOM | 6978 | C   | ALA A 401 | 1.277  | 32.286 | -36.775 | 1.00 | 0.00 | B | C |
| ATOM | 6979 | O   | ALA A 401 | 1.395  | 31.571 | -35.780 | 1.00 | 0.00 | B | O |
| ATOM | 6980 | N   | TYR A 402 | 0.188  | 33.039 | -37.013 | 1.00 | 0.00 | B | N |
| ATOM | 6981 | CA  | TYR A 402 | -0.977 | 33.177 | -36.178 | 1.00 | 0.00 | B | C |
| ATOM | 6982 | CB  | TYR A 402 | -1.783 | 34.416 | -36.634 | 1.00 | 0.00 | B | C |
| ATOM | 6983 | CG  | TYR A 402 | -3.017 | 34.675 | -35.833 | 1.00 | 0.00 | B | C |
| ATOM | 6984 | CD1 | TYR A 402 | -2.942 | 35.249 | -34.583 | 1.00 | 0.00 | B | C |
| ATOM | 6985 | CE1 | TYR A 402 | -4.084 | 35.506 | -33.857 | 1.00 | 0.00 | B | C |
| ATOM | 6986 | CZ  | TYR A 402 | -5.318 | 35.198 | -34.379 | 1.00 | 0.00 | B | C |
| ATOM | 6987 | OH  | TYR A 402 | -6.491 | 35.460 | -33.640 | 1.00 | 0.00 | B | O |
| ATOM | 6988 | CD2 | TYR A 402 | -4.258 | 34.384 | -36.350 | 1.00 | 0.00 | B | C |
| ATOM | 6989 | CE2 | TYR A 402 | -5.403 | 34.636 | -35.630 | 1.00 | 0.00 | B | C |
| ATOM | 6990 | C   | TYR A 402 | -1.886 | 31.971 | -36.174 | 1.00 | 0.00 | B | C |
| ATOM | 6991 | O   | TYR A 402 | -2.365 | 31.558 | -35.118 | 1.00 | 0.00 | B | O |
| ATOM | 6992 | N   | SER A 403 | -2.122 | 31.355 | -37.351 | 1.00 | 0.00 | B | N |
| ATOM | 6993 | CA  | SER A 403 | -3.171 | 30.376 | -37.518 | 1.00 | 0.00 | B | C |
| ATOM | 6994 | CB  | SER A 403 | -3.251 | 29.806 | -38.947 | 1.00 | 0.00 | B | C |
| ATOM | 6995 | OG  | SER A 403 | -3.589 | 30.839 | -39.861 | 1.00 | 0.00 | B | O |
| ATOM | 6996 | C   | SER A 403 | -3.074 | 29.205 | -36.586 | 1.00 | 0.00 | B | C |
| ATOM | 6997 | O   | SER A 403 | -2.003 | 28.645 | -36.367 | 1.00 | 0.00 | B | O |
| ATOM | 6998 | N   | SER A 404 | -4.241 | 28.801 | -36.027 | 1.00 | 0.00 | B | N |
| ATOM | 6999 | CA  | SER A 404 | -4.296 | 27.668 | -35.140 | 1.00 | 0.00 | B | C |
| ATOM | 7000 | CB  | SER A 404 | -4.106 | 28.016 | -33.652 | 1.00 | 0.00 | B | C |
| ATOM | 7001 | OG  | SER A 404 | -2.774 | 28.430 | -33.392 | 1.00 | 0.00 | B | O |
| ATOM | 7002 | C   | SER A 404 | -5.634 | 27.006 | -35.232 | 1.00 | 0.00 | B | C |
| ATOM | 7003 | O   | SER A 404 | -6.612 | 27.565 | -35.728 | 1.00 | 0.00 | B | O |
| ATOM | 7004 | N   | SER A 405 | -5.675 | 25.746 | -34.748 | 1.00 | 0.00 | B | N |
| ATOM | 7005 | CA  | SER A 405 | -6.868 | 24.965 | -34.588 | 1.00 | 0.00 | B | C |
| ATOM | 7006 | CB  | SER A 405 | -7.945 | 25.752 | -33.834 | 1.00 | 0.00 | B | C |
| ATOM | 7007 | OG  | SER A 405 | -7.406 | 26.234 | -32.616 | 1.00 | 0.00 | B | O |
| ATOM | 7008 | C   | SER A 405 | -7.461 | 24.569 | -35.904 | 1.00 | 0.00 | B | C |
| ATOM | 7009 | O   | SER A 405 | -8.503 | 23.915 | -35.932 | 1.00 | 0.00 | B | O |
| ATOM | 7010 | N   | GLU A 406 | -6.832 | 24.930 | -37.033 | 1.00 | 0.00 | B | N |

|      |      |     |     |   |     |        |        |         |      |      |   |   |
|------|------|-----|-----|---|-----|--------|--------|---------|------|------|---|---|
| ATOM | 7011 | CA  | GLU | A | 406 | -7.410 | 24.528 | -38.283 | 1.00 | 0.00 | B | C |
| ATOM | 7012 | CB  | GLU | A | 406 | -6.812 | 25.226 | -39.514 | 1.00 | 0.00 | B | C |
| ATOM | 7013 | CG  | GLU | A | 406 | -7.406 | 26.616 | -39.737 | 1.00 | 0.00 | B | C |
| ATOM | 7014 | CD  | GLU | A | 406 | -8.884 | 26.430 | -40.069 | 1.00 | 0.00 | B | C |
| ATOM | 7015 | OE1 | GLU | A | 406 | -9.322 | 25.254 | -40.186 | 1.00 | 0.00 | B | O |
| ATOM | 7016 | OE2 | GLU | A | 406 | -9.597 | 27.461 | -40.208 | 1.00 | 0.00 | B | O |
| ATOM | 7017 | C   | GLU | A | 406 | -7.269 | 23.052 | -38.458 | 1.00 | 0.00 | B | C |
| ATOM | 7018 | O   | GLU | A | 406 | -8.213 | 22.393 | -38.889 | 1.00 | 0.00 | B | O |
| ATOM | 7019 | N   | THR | A | 407 | -6.092 | 22.498 | -38.095 | 1.00 | 0.00 | B | N |
| ATOM | 7020 | CA  | THR | A | 407 | -5.705 | 21.112 | -38.237 | 1.00 | 0.00 | B | C |
| ATOM | 7021 | CB  | THR | A | 407 | -6.865 | 20.177 | -38.006 | 1.00 | 0.00 | B | C |
| ATOM | 7022 | OG1 | THR | A | 407 | -7.390 | 20.389 | -36.704 | 1.00 | 0.00 | B | O |
| ATOM | 7023 | CG2 | THR | A | 407 | -6.405 | 18.716 | -38.143 | 1.00 | 0.00 | B | C |
| ATOM | 7024 | C   | THR | A | 407 | -5.068 | 20.802 | -39.581 | 1.00 | 0.00 | B | C |
| ATOM | 7025 | O   | THR | A | 407 | -4.389 | 19.775 | -39.658 | 1.00 | 0.00 | B | O |
| ATOM | 7026 | N   | PRO | A | 408 | -5.204 | 21.556 | -40.650 | 1.00 | 0.00 | B | N |
| ATOM | 7027 | CD  | PRO | A | 408 | -6.559 | 21.846 | -41.096 | 1.00 | 0.00 | B | C |
| ATOM | 7028 | CA  | PRO | A | 408 | -4.373 | 21.296 | -41.808 | 1.00 | 0.00 | B | C |
| ATOM | 7029 | CB  | PRO | A | 408 | -5.155 | 21.750 | -43.039 | 1.00 | 0.00 | B | C |
| ATOM | 7030 | CG  | PRO | A | 408 | -6.613 | 21.620 | -42.609 | 1.00 | 0.00 | B | C |
| ATOM | 7031 | C   | PRO | A | 408 | -3.035 | 21.976 | -41.727 | 1.00 | 0.00 | B | C |
| ATOM | 7032 | O   | PRO | A | 408 | -2.297 | 21.931 | -42.711 | 1.00 | 0.00 | B | O |
| ATOM | 7033 | N   | ASN | A | 409 | -2.705 | 22.600 | -40.582 | 1.00 | 0.00 | B | N |
| ATOM | 7034 | CA  | ASN | A | 409 | -1.596 | 23.508 | -40.446 | 1.00 | 0.00 | B | C |
| ATOM | 7035 | CB  | ASN | A | 409 | -1.532 | 24.200 | -39.067 | 1.00 | 0.00 | B | C |
| ATOM | 7036 | CG  | ASN | A | 409 | -1.248 | 23.197 | -37.952 | 1.00 | 0.00 | B | C |
| ATOM | 7037 | OD1 | ASN | A | 409 | -0.262 | 22.463 | -37.960 | 1.00 | 0.00 | B | O |
| ATOM | 7038 | ND2 | ASN | A | 409 | -2.146 | 23.178 | -36.933 | 1.00 | 0.00 | B | N |
| ATOM | 7039 | C   | ASN | A | 409 | -0.236 | 22.946 | -40.732 | 1.00 | 0.00 | B | C |
| ATOM | 7040 | O   | ASN | A | 409 | 0.602  | 23.672 | -41.267 | 1.00 | 0.00 | B | O |
| ATOM | 7041 | N   | ARG | A | 410 | 0.021  | 21.660 | -40.433 | 1.00 | 0.00 | B | N |
| ATOM | 7042 | CA  | ARG | A | 410 | 1.341  | 21.096 | -40.516 | 1.00 | 0.00 | B | C |
| ATOM | 7043 | CB  | ARG | A | 410 | 1.268  | 19.585 | -40.250 | 1.00 | 0.00 | B | C |
| ATOM | 7044 | CG  | ARG | A | 410 | 0.561  | 19.321 | -38.915 | 1.00 | 0.00 | B | C |
| ATOM | 7045 | CD  | ARG | A | 410 | 0.023  | 17.901 | -38.718 | 1.00 | 0.00 | B | C |
| ATOM | 7046 | NE  | ARG | A | 410 | -0.811 | 17.920 | -37.479 | 1.00 | 0.00 | B | N |
| ATOM | 7047 | CZ  | ARG | A | 410 | -2.016 | 17.274 | -37.447 | 1.00 | 0.00 | B | C |
| ATOM | 7048 | NH1 | ARG | A | 410 | -2.453 | 16.587 | -38.540 | 1.00 | 0.00 | B | N |

|      |      |               |        |        |         |      |      |   |   |
|------|------|---------------|--------|--------|---------|------|------|---|---|
| ATOM | 7049 | NH2 ARG A 410 | -2.785 | 17.317 | -36.317 | 1.00 | 0.00 | B | N |
| ATOM | 7050 | C ARG A 410   | 1.886  | 21.364 | -41.891 | 1.00 | 0.00 | B | C |
| ATOM | 7051 | O ARG A 410   | 3.052  | 21.727 | -42.044 | 1.00 | 0.00 | B | O |
| ATOM | 7052 | N HSD A 411   | 1.040  | 21.238 | -42.928 | 1.00 | 0.00 | B | N |
| ATOM | 7053 | CA HSD A 411  | 1.457  | 21.480 | -44.282 | 1.00 | 0.00 | B | C |
| ATOM | 7054 | CB HSD A 411  | 0.391  | 21.085 | -45.319 | 1.00 | 0.00 | B | C |
| ATOM | 7055 | ND1 HSD A 411 | -0.924 | 19.002 | -44.689 | 1.00 | 0.00 | B | N |
| ATOM | 7056 | CG HSD A 411  | 0.124  | 19.611 | -45.343 | 1.00 | 0.00 | B | C |
| ATOM | 7057 | CE1 HSD A 411 | -0.824 | 17.673 | -44.939 | 1.00 | 0.00 | B | C |
| ATOM | 7058 | NE2 HSD A 411 | 0.212  | 17.384 | -45.708 | 1.00 | 0.00 | B | N |
| ATOM | 7059 | CD2 HSD A 411 | 0.809  | 18.607 | -45.960 | 1.00 | 0.00 | B | C |
| ATOM | 7060 | C HSD A 411   | 1.797  | 22.929 | -44.523 | 1.00 | 0.00 | B | C |
| ATOM | 7061 | O HSD A 411   | 2.777  | 23.230 | -45.203 | 1.00 | 0.00 | B | O |
| ATOM | 7062 | N ASP A 412   | 0.999  | 23.872 | -43.985 | 1.00 | 0.00 | B | N |
| ATOM | 7063 | CA ASP A 412  | 1.171  | 25.278 | -44.261 | 1.00 | 0.00 | B | C |
| ATOM | 7064 | CB ASP A 412  | 0.094  | 26.130 | -43.563 | 1.00 | 0.00 | B | C |
| ATOM | 7065 | CG ASP A 412  | -1.277 | 25.773 | -44.117 | 1.00 | 0.00 | B | C |
| ATOM | 7066 | OD1 ASP A 412 | -1.443 | 25.814 | -45.366 | 1.00 | 0.00 | B | O |
| ATOM | 7067 | OD2 ASP A 412 | -2.175 | 25.445 | -43.297 | 1.00 | 0.00 | B | O |
| ATOM | 7068 | C ASP A 412   | 2.494  | 25.762 | -43.736 | 1.00 | 0.00 | B | C |
| ATOM | 7069 | O ASP A 412   | 3.209  | 26.502 | -44.410 | 1.00 | 0.00 | B | O |
| ATOM | 7070 | N MET A 413   | 2.853  | 25.356 | -42.505 | 1.00 | 0.00 | B | N |
| ATOM | 7071 | CA MET A 413  | 4.072  | 25.800 | -41.888 | 1.00 | 0.00 | B | C |
| ATOM | 7072 | CB MET A 413  | 4.245  | 25.290 | -40.449 | 1.00 | 0.00 | B | C |
| ATOM | 7073 | CG MET A 413  | 5.541  | 25.773 | -39.797 | 1.00 | 0.00 | B | C |
| ATOM | 7074 | SD MET A 413  | 5.574  | 27.555 | -39.441 | 1.00 | 0.00 | B | S |
| ATOM | 7075 | CE MET A 413  | 6.167  | 28.054 | -41.082 | 1.00 | 0.00 | B | C |
| ATOM | 7076 | C MET A 413   | 5.234  | 25.283 | -42.678 | 1.00 | 0.00 | B | C |
| ATOM | 7077 | O MET A 413   | 6.233  | 25.975 | -42.868 | 1.00 | 0.00 | B | O |
| ATOM | 7078 | N LEU A 414   | 5.108  | 24.047 | -43.182 | 1.00 | 0.00 | B | N |
| ATOM | 7079 | CA LEU A 414  | 6.147  | 23.352 | -43.886 | 1.00 | 0.00 | B | C |
| ATOM | 7080 | CB LEU A 414  | 5.753  | 21.925 | -44.289 | 1.00 | 0.00 | B | C |
| ATOM | 7081 | CG LEU A 414  | 6.808  | 21.276 | -45.196 | 1.00 | 0.00 | B | C |
| ATOM | 7082 | CD1 LEU A 414 | 8.175  | 21.209 | -44.501 | 1.00 | 0.00 | B | C |
| ATOM | 7083 | CD2 LEU A 414 | 6.320  | 19.921 | -45.727 | 1.00 | 0.00 | B | C |
| ATOM | 7084 | C LEU A 414   | 6.523  | 24.055 | -45.151 | 1.00 | 0.00 | B | C |
| ATOM | 7085 | O LEU A 414   | 7.653  | 23.923 | -45.619 | 1.00 | 0.00 | B | O |
| ATOM | 7086 | N LEU A 415   | 5.585  | 24.818 | -45.738 | 1.00 | 0.00 | B | N |

|      |      |     |     |       |        |        |         |      |      |   |   |
|------|------|-----|-----|-------|--------|--------|---------|------|------|---|---|
| ATOM | 7087 | CA  | LEU | A 415 | 5.759  | 25.403 | -47.039 | 1.00 | 0.00 | B | C |
| ATOM | 7088 | CB  | LEU | A 415 | 4.629  | 26.391 | -47.391 | 1.00 | 0.00 | B | C |
| ATOM | 7089 | CG  | LEU | A 415 | 4.757  | 27.018 | -48.789 | 1.00 | 0.00 | B | C |
| ATOM | 7090 | CD1 | LEU | A 415 | 4.684  | 25.940 | -49.881 | 1.00 | 0.00 | B | C |
| ATOM | 7091 | CD2 | LEU | A 415 | 3.725  | 28.134 | -49.003 | 1.00 | 0.00 | B | C |
| ATOM | 7092 | C   | LEU | A 415 | 7.075  | 26.115 | -47.152 | 1.00 | 0.00 | B | C |
| ATOM | 7093 | O   | LEU | A 415 | 7.525  | 26.805 | -46.239 | 1.00 | 0.00 | B | O |
| ATOM | 7094 | N   | VAL | A 416 | 7.741  | 25.931 | -48.313 | 1.00 | 0.00 | B | N |
| ATOM | 7095 | CA  | VAL | A 416 | 9.037  | 26.490 | -48.566 | 1.00 | 0.00 | B | C |
| ATOM | 7096 | CB  | VAL | A 416 | 10.119 | 25.443 | -48.543 | 1.00 | 0.00 | B | C |
| ATOM | 7097 | CG1 | VAL | A 416 | 10.128 | 24.779 | -47.157 | 1.00 | 0.00 | B | C |
| ATOM | 7098 | CG2 | VAL | A 416 | 9.885  | 24.456 | -49.700 | 1.00 | 0.00 | B | C |
| ATOM | 7099 | C   | VAL | A 416 | 9.010  | 27.060 | -49.952 | 1.00 | 0.00 | B | C |
| ATOM | 7100 | O   | VAL | A 416 | 8.032  | 26.897 | -50.679 | 1.00 | 0.00 | B | O |
| ATOM | 7101 | N   | GLU | A 417 | 10.087 | 27.749 | -50.369 | 1.00 | 0.00 | B | N |
| ATOM | 7102 | CA  | GLU | A 417 | 11.231 | 27.978 | -49.541 | 1.00 | 0.00 | B | C |
| ATOM | 7103 | CB  | GLU | A 417 | 12.467 | 28.487 | -50.289 | 1.00 | 0.00 | B | C |
| ATOM | 7104 | CG  | GLU | A 417 | 13.722 | 28.533 | -49.412 | 1.00 | 0.00 | B | C |
| ATOM | 7105 | CD  | GLU | A 417 | 14.102 | 27.095 | -49.070 | 1.00 | 0.00 | B | C |
| ATOM | 7106 | OE1 | GLU | A 417 | 13.376 | 26.473 | -48.251 | 1.00 | 0.00 | B | O |
| ATOM | 7107 | OE2 | GLU | A 417 | 15.119 | 26.601 | -49.624 | 1.00 | 0.00 | B | O |
| ATOM | 7108 | C   | GLU | A 417 | 10.952 | 28.980 | -48.477 | 1.00 | 0.00 | B | C |
| ATOM | 7109 | O   | GLU | A 417 | 11.402 | 28.758 | -47.368 | 1.00 | 0.00 | B | O |
| ATOM | 7110 | N   | PRO | A 418 | 10.238 | 30.050 | -48.685 | 1.00 | 0.00 | B | N |
| ATOM | 7111 | CD  | PRO | A 418 | 10.056 | 30.624 | -50.009 | 1.00 | 0.00 | B | C |
| ATOM | 7112 | CA  | PRO | A 418 | 10.197 | 31.063 | -47.665 | 1.00 | 0.00 | B | C |
| ATOM | 7113 | CB  | PRO | A 418 | 9.489  | 32.260 | -48.293 | 1.00 | 0.00 | B | C |
| ATOM | 7114 | CG  | PRO | A 418 | 9.844  | 32.132 | -49.782 | 1.00 | 0.00 | B | C |
| ATOM | 7115 | C   | PRO | A 418 | 9.679  | 30.725 | -46.313 | 1.00 | 0.00 | B | C |
| ATOM | 7116 | O   | PRO | A 418 | 10.257 | 31.208 | -45.350 | 1.00 | 0.00 | B | O |
| ATOM | 7117 | N   | LEU | A 419 | 8.616  | 29.935 | -46.155 | 1.00 | 0.00 | B | N |
| ATOM | 7118 | CA  | LEU | A 419 | 8.176  | 29.771 | -44.799 | 1.00 | 0.00 | B | C |
| ATOM | 7119 | CB  | LEU | A 419 | 6.867  | 28.972 | -44.702 | 1.00 | 0.00 | B | C |
| ATOM | 7120 | CG  | LEU | A 419 | 5.706  | 29.612 | -45.488 | 1.00 | 0.00 | B | C |
| ATOM | 7121 | CD1 | LEU | A 419 | 4.404  | 28.818 | -45.307 | 1.00 | 0.00 | B | C |
| ATOM | 7122 | CD2 | LEU | A 419 | 5.551  | 31.105 | -45.158 | 1.00 | 0.00 | B | C |
| ATOM | 7123 | C   | LEU | A 419 | 9.243  | 29.048 | -44.031 | 1.00 | 0.00 | B | C |
| ATOM | 7124 | O   | LEU | A 419 | 9.622  | 29.465 | -42.936 | 1.00 | 0.00 | B | O |



|      |      |     |           |        |        |         |      |      |   |   |
|------|------|-----|-----------|--------|--------|---------|------|------|---|---|
| ATOM | 7125 | N   | ASN A 420 | 9.773  | 27.950 | -44.593 | 1.00 | 0.00 | B | N |
| ATOM | 7126 | CA  | ASN A 420 | 10.814 | 27.217 | -43.923 | 1.00 | 0.00 | B | C |
| ATOM | 7127 | CB  | ASN A 420 | 11.124 | 25.873 | -44.606 | 1.00 | 0.00 | B | C |
| ATOM | 7128 | CG  | ASN A 420 | 12.240 | 25.163 | -43.838 | 1.00 | 0.00 | B | C |
| ATOM | 7129 | OD1 | ASN A 420 | 13.383 | 25.602 | -43.840 | 1.00 | 0.00 | B | O |
| ATOM | 7130 | ND2 | ASN A 420 | 11.891 | 24.027 | -43.171 | 1.00 | 0.00 | B | N |
| ATOM | 7131 | C   | ASN A 420 | 12.084 | 28.013 | -43.897 | 1.00 | 0.00 | B | C |
| ATOM | 7132 | O   | ASN A 420 | 12.737 | 28.140 | -42.864 | 1.00 | 0.00 | B | O |
| ATOM | 7133 | N   | ARG A 421 | 12.456 | 28.578 | -45.054 | 1.00 | 0.00 | B | N |
| ATOM | 7134 | CA  | ARG A 421 | 13.680 | 29.286 | -45.290 | 1.00 | 0.00 | B | C |
| ATOM | 7135 | CB  | ARG A 421 | 13.863 | 29.784 | -46.735 | 1.00 | 0.00 | B | C |
| ATOM | 7136 | CG  | ARG A 421 | 15.172 | 30.563 | -46.895 | 1.00 | 0.00 | B | C |
| ATOM | 7137 | CD  | ARG A 421 | 15.108 | 31.719 | -47.896 | 1.00 | 0.00 | B | C |
| ATOM | 7138 | NE  | ARG A 421 | 15.074 | 31.153 | -49.270 | 1.00 | 0.00 | B | N |
| ATOM | 7139 | CZ  | ARG A 421 | 15.231 | 31.993 | -50.337 | 1.00 | 0.00 | B | C |
| ATOM | 7140 | NH1 | ARG A 421 | 15.375 | 33.333 | -50.128 | 1.00 | 0.00 | B | N |
| ATOM | 7141 | NH2 | ARG A 421 | 15.244 | 31.492 | -51.608 | 1.00 | 0.00 | B | N |
| ATOM | 7142 | C   | ARG A 421 | 13.745 | 30.520 | -44.455 | 1.00 | 0.00 | B | C |
| ATOM | 7143 | O   | ARG A 421 | 14.770 | 30.814 | -43.848 | 1.00 | 0.00 | B | O |
| ATOM | 7144 | N   | LEU A 422 | 12.638 | 31.273 | -44.403 | 1.00 | 0.00 | B | N |
| ATOM | 7145 | CA  | LEU A 422 | 12.603 | 32.547 | -43.746 | 1.00 | 0.00 | B | C |
| ATOM | 7146 | CB  | LEU A 422 | 11.255 | 33.293 | -43.907 | 1.00 | 0.00 | B | C |
| ATOM | 7147 | CG  | LEU A 422 | 11.181 | 34.752 | -43.396 | 1.00 | 0.00 | B | C |
| ATOM | 7148 | CD1 | LEU A 422 | 9.824  | 35.383 | -43.747 | 1.00 | 0.00 | B | C |
| ATOM | 7149 | CD2 | LEU A 422 | 11.459 | 34.876 | -41.895 | 1.00 | 0.00 | B | C |
| ATOM | 7150 | C   | LEU A 422 | 12.872 | 32.344 | -42.291 | 1.00 | 0.00 | B | C |
| ATOM | 7151 | O   | LEU A 422 | 13.634 | 33.101 | -41.692 | 1.00 | 0.00 | B | O |
| ATOM | 7152 | N   | LEU A 423 | 12.263 | 31.314 | -41.680 | 1.00 | 0.00 | B | N |
| ATOM | 7153 | CA  | LEU A 423 | 12.440 | 31.125 | -40.268 | 1.00 | 0.00 | B | C |
| ATOM | 7154 | CB  | LEU A 423 | 11.549 | 30.023 | -39.672 | 1.00 | 0.00 | B | C |
| ATOM | 7155 | CG  | LEU A 423 | 10.096 | 30.481 | -39.433 | 1.00 | 0.00 | B | C |
| ATOM | 7156 | CD1 | LEU A 423 | 10.024 | 31.487 | -38.275 | 1.00 | 0.00 | B | C |
| ATOM | 7157 | CD2 | LEU A 423 | 9.452  | 31.042 | -40.707 | 1.00 | 0.00 | B | C |
| ATOM | 7158 | C   | LEU A 423 | 13.870 | 30.826 | -39.937 | 1.00 | 0.00 | B | C |
| ATOM | 7159 | O   | LEU A 423 | 14.394 | 31.314 | -38.937 | 1.00 | 0.00 | B | O |
| ATOM | 7160 | N   | GLN A 424 | 14.547 | 30.022 | -40.772 | 1.00 | 0.00 | B | N |
| ATOM | 7161 | CA  | GLN A 424 | 15.903 | 29.654 | -40.475 | 1.00 | 0.00 | B | C |
| ATOM | 7162 | CB  | GLN A 424 | 16.481 | 28.698 | -41.535 | 1.00 | 0.00 | B | C |

|      |      |     |           |        |        |         |      |      |   |   |
|------|------|-----|-----------|--------|--------|---------|------|------|---|---|
| ATOM | 7163 | CG  | GLN A 424 | 17.907 | 28.229 | -41.243 | 1.00 | 0.00 | B | C |
| ATOM | 7164 | CD  | GLN A 424 | 17.839 | 27.304 | -40.040 | 1.00 | 0.00 | B | C |
| ATOM | 7165 | OE1 | GLN A 424 | 16.929 | 27.409 | -39.219 | 1.00 | 0.00 | B | O |
| ATOM | 7166 | NE2 | GLN A 424 | 18.822 | 26.368 | -39.932 | 1.00 | 0.00 | B | N |
| ATOM | 7167 | C   | GLN A 424 | 16.742 | 30.890 | -40.462 | 1.00 | 0.00 | B | C |
| ATOM | 7168 | O   | GLN A 424 | 17.587 | 31.078 | -39.588 | 1.00 | 0.00 | B | O |
| ATOM | 7169 | N   | ASP A 425 | 16.502 | 31.782 | -41.436 | 1.00 | 0.00 | B | N |
| ATOM | 7170 | CA  | ASP A 425 | 17.287 | 32.971 | -41.567 | 1.00 | 0.00 | B | C |
| ATOM | 7171 | CB  | ASP A 425 | 16.881 | 33.776 | -42.813 | 1.00 | 0.00 | B | C |
| ATOM | 7172 | CG  | ASP A 425 | 18.015 | 34.717 | -43.190 | 1.00 | 0.00 | B | C |
| ATOM | 7173 | OD1 | ASP A 425 | 18.613 | 35.333 | -42.271 | 1.00 | 0.00 | B | O |
| ATOM | 7174 | OD2 | ASP A 425 | 18.293 | 34.832 | -44.414 | 1.00 | 0.00 | B | O |
| ATOM | 7175 | C   | ASP A 425 | 17.083 | 33.830 | -40.358 | 1.00 | 0.00 | B | C |
| ATOM | 7176 | O   | ASP A 425 | 18.039 | 34.384 | -39.815 | 1.00 | 0.00 | B | O |
| ATOM | 7177 | N   | LYS A 426 | 15.826 | 33.970 | -39.900 | 1.00 | 0.00 | B | N |
| ATOM | 7178 | CA  | LYS A 426 | 15.575 | 34.825 | -38.774 | 1.00 | 0.00 | B | C |
| ATOM | 7179 | CB  | LYS A 426 | 14.081 | 35.069 | -38.499 | 1.00 | 0.00 | B | C |
| ATOM | 7180 | CG  | LYS A 426 | 13.435 | 36.055 | -39.475 | 1.00 | 0.00 | B | C |
| ATOM | 7181 | CD  | LYS A 426 | 11.921 | 36.171 | -39.292 | 1.00 | 0.00 | B | C |
| ATOM | 7182 | CE  | LYS A 426 | 11.274 | 37.251 | -40.160 | 1.00 | 0.00 | B | C |
| ATOM | 7183 | NZ  | LYS A 426 | 9.805  | 37.067 | -40.174 | 1.00 | 0.00 | B | N |
| ATOM | 7184 | C   | LYS A 426 | 16.177 | 34.289 | -37.505 | 1.00 | 0.00 | B | C |
| ATOM | 7185 | O   | LYS A 426 | 16.791 | 35.037 | -36.746 | 1.00 | 0.00 | B | O |
| ATOM | 7186 | N   | TRP A 427 | 15.967 | 32.991 | -37.218 | 1.00 | 0.00 | B | N |
| ATOM | 7187 | CA  | TRP A 427 | 16.387 | 32.382 | -35.980 | 1.00 | 0.00 | B | C |
| ATOM | 7188 | CB  | TRP A 427 | 15.631 | 31.053 | -35.719 | 1.00 | 0.00 | B | C |
| ATOM | 7189 | CG  | TRP A 427 | 15.739 | 30.495 | -34.315 | 1.00 | 0.00 | B | C |
| ATOM | 7190 | CD1 | TRP A 427 | 15.211 | 31.021 | -33.179 | 1.00 | 0.00 | B | C |
| ATOM | 7191 | NE1 | TRP A 427 | 15.497 | 30.225 | -32.099 | 1.00 | 0.00 | B | N |
| ATOM | 7192 | CE2 | TRP A 427 | 16.208 | 29.135 | -32.540 | 1.00 | 0.00 | B | C |
| ATOM | 7193 | CD2 | TRP A 427 | 16.375 | 29.263 | -33.922 | 1.00 | 0.00 | B | C |
| ATOM | 7194 | CE3 | TRP A 427 | 17.036 | 28.315 | -34.645 | 1.00 | 0.00 | B | C |
| ATOM | 7195 | CZ3 | TRP A 427 | 17.539 | 27.233 | -33.955 | 1.00 | 0.00 | B | C |
| ATOM | 7196 | CZ2 | TRP A 427 | 16.702 | 28.058 | -31.861 | 1.00 | 0.00 | B | C |
| ATOM | 7197 | CH2 | TRP A 427 | 17.380 | 27.107 | -32.590 | 1.00 | 0.00 | B | C |
| ATOM | 7198 | C   | TRP A 427 | 17.854 | 32.114 | -35.914 | 1.00 | 0.00 | B | C |
| ATOM | 7199 | O   | TRP A 427 | 18.510 | 32.463 | -34.935 | 1.00 | 0.00 | B | O |
| ATOM | 7200 | N   | ASP A 428 | 18.408 | 31.507 | -36.978 | 1.00 | 0.00 | B | N |

|      |      |     |           |        |        |         |      |      |   |   |
|------|------|-----|-----------|--------|--------|---------|------|------|---|---|
| ATOM | 7201 | CA  | ASP A 428 | 19.762 | 31.053 | -36.934 | 1.00 | 0.00 | B | C |
| ATOM | 7202 | CB  | ASP A 428 | 20.218 | 30.449 | -38.275 | 1.00 | 0.00 | B | C |
| ATOM | 7203 | CG  | ASP A 428 | 21.614 | 29.854 | -38.130 | 1.00 | 0.00 | B | C |
| ATOM | 7204 | OD1 | ASP A 428 | 22.239 | 30.026 | -37.048 | 1.00 | 0.00 | B | O |
| ATOM | 7205 | OD2 | ASP A 428 | 22.072 | 29.207 | -39.109 | 1.00 | 0.00 | B | O |
| ATOM | 7206 | C   | ASP A 428 | 20.635 | 32.211 | -36.645 | 1.00 | 0.00 | B | C |
| ATOM | 7207 | O   | ASP A 428 | 21.501 | 32.131 | -35.776 | 1.00 | 0.00 | B | O |
| ATOM | 7208 | N   | ARG A 429 | 20.456 | 33.327 | -37.366 | 1.00 | 0.00 | B | N |
| ATOM | 7209 | CA  | ARG A 429 | 21.392 | 34.339 | -37.033 | 1.00 | 0.00 | B | C |
| ATOM | 7210 | CB  | ARG A 429 | 21.407 | 35.520 | -38.016 | 1.00 | 0.00 | B | C |
| ATOM | 7211 | CG  | ARG A 429 | 20.065 | 36.223 | -38.203 | 1.00 | 0.00 | B | C |
| ATOM | 7212 | CD  | ARG A 429 | 20.139 | 37.392 | -39.189 | 1.00 | 0.00 | B | C |
| ATOM | 7213 | NE  | ARG A 429 | 20.638 | 36.844 | -40.482 | 1.00 | 0.00 | B | N |
| ATOM | 7214 | CZ  | ARG A 429 | 21.306 | 37.654 | -41.355 | 1.00 | 0.00 | B | C |
| ATOM | 7215 | NH1 | ARG A 429 | 21.545 | 38.959 | -41.037 | 1.00 | 0.00 | B | N |
| ATOM | 7216 | NH2 | ARG A 429 | 21.741 | 37.149 | -42.548 | 1.00 | 0.00 | B | N |
| ATOM | 7217 | C   | ARG A 429 | 21.199 | 34.854 | -35.632 | 1.00 | 0.00 | B | C |
| ATOM | 7218 | O   | ARG A 429 | 22.085 | 34.687 | -34.800 | 1.00 | 0.00 | B | O |
| ATOM | 7219 | N   | PHE A 430 | 20.069 | 35.551 | -35.362 | 1.00 | 0.00 | B | N |
| ATOM | 7220 | CA  | PHE A 430 | 19.787 | 36.140 | -34.072 | 1.00 | 0.00 | B | C |
| ATOM | 7221 | CB  | PHE A 430 | 19.321 | 37.603 | -34.200 | 1.00 | 0.00 | B | C |
| ATOM | 7222 | CG  | PHE A 430 | 18.199 | 37.655 | -35.180 | 1.00 | 0.00 | B | C |
| ATOM | 7223 | CD1 | PHE A 430 | 16.913 | 37.375 | -34.796 | 1.00 | 0.00 | B | C |
| ATOM | 7224 | CE1 | PHE A 430 | 15.893 | 37.421 | -35.715 | 1.00 | 0.00 | B | C |
| ATOM | 7225 | CZ  | PHE A 430 | 16.141 | 37.749 | -37.025 | 1.00 | 0.00 | B | C |
| ATOM | 7226 | CD2 | PHE A 430 | 18.439 | 37.981 | -36.494 | 1.00 | 0.00 | B | C |
| ATOM | 7227 | CE2 | PHE A 430 | 17.425 | 38.028 | -37.420 | 1.00 | 0.00 | B | C |
| ATOM | 7228 | C   | PHE A 430 | 18.877 | 35.450 | -33.073 | 1.00 | 0.00 | B | C |
| ATOM | 7229 | O   | PHE A 430 | 19.160 | 35.454 | -31.875 | 1.00 | 0.00 | B | O |
| ATOM | 7230 | N   | VAL A 431 | 17.765 | 34.839 | -33.534 | 1.00 | 0.00 | B | N |
| ATOM | 7231 | CA  | VAL A 431 | 16.646 | 34.522 | -32.669 | 1.00 | 0.00 | B | C |
| ATOM | 7232 | CB  | VAL A 431 | 15.465 | 33.944 | -33.384 | 1.00 | 0.00 | B | C |
| ATOM | 7233 | CG1 | VAL A 431 | 14.358 | 33.702 | -32.340 | 1.00 | 0.00 | B | C |
| ATOM | 7234 | CG2 | VAL A 431 | 15.063 | 34.855 | -34.547 | 1.00 | 0.00 | B | C |
| ATOM | 7235 | C   | VAL A 431 | 16.949 | 33.562 | -31.567 | 1.00 | 0.00 | B | C |
| ATOM | 7236 | O   | VAL A 431 | 16.476 | 33.737 | -30.445 | 1.00 | 0.00 | B | O |
| ATOM | 7237 | N   | LYS A 432 | 17.728 | 32.508 | -31.841 | 1.00 | 0.00 | B | N |
| ATOM | 7238 | CA  | LYS A 432 | 17.946 | 31.509 | -30.843 | 1.00 | 0.00 | B | C |

|      |      |     |     |   |     |        |        |         |      |      |   |   |
|------|------|-----|-----|---|-----|--------|--------|---------|------|------|---|---|
| ATOM | 7239 | CB  | LYS | A | 432 | 18.893 | 30.400 | -31.326 | 1.00 | 0.00 | B | C |
| ATOM | 7240 | CG  | LYS | A | 432 | 20.269 | 30.923 | -31.741 | 1.00 | 0.00 | B | C |
| ATOM | 7241 | CD  | LYS | A | 432 | 21.296 | 29.820 | -32.005 | 1.00 | 0.00 | B | C |
| ATOM | 7242 | CE  | LYS | A | 432 | 22.637 | 30.347 | -32.520 | 1.00 | 0.00 | B | C |
| ATOM | 7243 | NZ  | LYS | A | 432 | 23.553 | 29.216 | -32.782 | 1.00 | 0.00 | B | N |
| ATOM | 7244 | C   | LYS | A | 432 | 18.556 | 32.148 | -29.641 | 1.00 | 0.00 | B | C |
| ATOM | 7245 | O   | LYS | A | 432 | 18.201 | 31.822 | -28.509 | 1.00 | 0.00 | B | O |
| ATOM | 7246 | N   | ARG | A | 433 | 19.479 | 33.096 | -29.855 | 1.00 | 0.00 | B | N |
| ATOM | 7247 | CA  | ARG | A | 433 | 20.164 | 33.725 | -28.767 | 1.00 | 0.00 | B | C |
| ATOM | 7248 | CB  | ARG | A | 433 | 21.266 | 34.684 | -29.241 | 1.00 | 0.00 | B | C |
| ATOM | 7249 | CG  | ARG | A | 433 | 22.175 | 35.165 | -28.109 | 1.00 | 0.00 | B | C |
| ATOM | 7250 | CD  | ARG | A | 433 | 23.519 | 35.707 | -28.599 | 1.00 | 0.00 | B | C |
| ATOM | 7251 | NE  | ARG | A | 433 | 24.186 | 34.597 | -29.340 | 1.00 | 0.00 | B | N |
| ATOM | 7252 | CZ  | ARG | A | 433 | 24.919 | 33.665 | -28.663 | 1.00 | 0.00 | B | C |
| ATOM | 7253 | NH1 | ARG | A | 433 | 25.101 | 33.783 | -27.317 | 1.00 | 0.00 | B | N |
| ATOM | 7254 | NH2 | ARG | A | 433 | 25.459 | 32.608 | -29.338 | 1.00 | 0.00 | B | N |
| ATOM | 7255 | C   | ARG | A | 433 | 19.201 | 34.491 | -27.908 | 1.00 | 0.00 | B | C |
| ATOM | 7256 | O   | ARG | A | 433 | 19.315 | 34.466 | -26.683 | 1.00 | 0.00 | B | O |
| ATOM | 7257 | N   | ILE | A | 434 | 18.219 | 35.186 | -28.521 | 1.00 | 0.00 | B | N |
| ATOM | 7258 | CA  | ILE | A | 434 | 17.320 | 36.037 | -27.785 | 1.00 | 0.00 | B | C |
| ATOM | 7259 | CB  | ILE | A | 434 | 16.379 | 36.834 | -28.649 | 1.00 | 0.00 | B | C |
| ATOM | 7260 | CG2 | ILE | A | 434 | 17.250 | 37.594 | -29.657 | 1.00 | 0.00 | B | C |
| ATOM | 7261 | CG1 | ILE | A | 434 | 15.328 | 35.957 | -29.343 | 1.00 | 0.00 | B | C |
| ATOM | 7262 | CD  | ILE | A | 434 | 14.200 | 36.758 | -29.992 | 1.00 | 0.00 | B | C |
| ATOM | 7263 | C   | ILE | A | 434 | 16.474 | 35.226 | -26.852 | 1.00 | 0.00 | B | C |
| ATOM | 7264 | O   | ILE | A | 434 | 16.223 | 35.629 | -25.718 | 1.00 | 0.00 | B | O |
| ATOM | 7265 | N   | PHE | A | 435 | 16.005 | 34.060 | -27.321 | 1.00 | 0.00 | B | N |
| ATOM | 7266 | CA  | PHE | A | 435 | 15.101 | 33.206 | -26.606 | 1.00 | 0.00 | B | C |
| ATOM | 7267 | CB  | PHE | A | 435 | 14.661 | 32.056 | -27.525 | 1.00 | 0.00 | B | C |
| ATOM | 7268 | CG  | PHE | A | 435 | 13.628 | 31.242 | -26.847 | 1.00 | 0.00 | B | C |
| ATOM | 7269 | CD1 | PHE | A | 435 | 12.459 | 31.814 | -26.400 | 1.00 | 0.00 | B | C |
| ATOM | 7270 | CE1 | PHE | A | 435 | 11.497 | 31.049 | -25.784 | 1.00 | 0.00 | B | C |
| ATOM | 7271 | CZ  | PHE | A | 435 | 11.699 | 29.700 | -25.636 | 1.00 | 0.00 | B | C |
| ATOM | 7272 | CD2 | PHE | A | 435 | 13.817 | 29.892 | -26.719 | 1.00 | 0.00 | B | C |
| ATOM | 7273 | CE2 | PHE | A | 435 | 12.857 | 29.129 | -26.111 | 1.00 | 0.00 | B | C |
| ATOM | 7274 | C   | PHE | A | 435 | 15.730 | 32.684 | -25.344 | 1.00 | 0.00 | B | C |
| ATOM | 7275 | O   | PHE | A | 435 | 15.090 | 32.663 | -24.292 | 1.00 | 0.00 | B | O |
| ATOM | 7276 | N   | TYR | A | 436 | 17.007 | 32.265 | -25.405 | 1.00 | 0.00 | B | N |

|      |      |     |     |       |        |        |         |      |      |   |   |
|------|------|-----|-----|-------|--------|--------|---------|------|------|---|---|
| ATOM | 7277 | CA  | TYR | A 436 | 17.679 | 31.725 | -24.254 | 1.00 | 0.00 | B | C |
| ATOM | 7278 | CB  | TYR | A 436 | 19.130 | 31.297 | -24.535 | 1.00 | 0.00 | B | C |
| ATOM | 7279 | CG  | TYR | A 436 | 19.112 | 30.027 | -25.309 | 1.00 | 0.00 | B | C |
| ATOM | 7280 | CD1 | TYR | A 436 | 19.017 | 28.825 | -24.644 | 1.00 | 0.00 | B | C |
| ATOM | 7281 | CE1 | TYR | A 436 | 19.006 | 27.639 | -25.332 | 1.00 | 0.00 | B | C |
| ATOM | 7282 | CZ  | TYR | A 436 | 19.091 | 27.651 | -26.702 | 1.00 | 0.00 | B | C |
| ATOM | 7283 | OH  | TYR | A 436 | 19.085 | 26.436 | -27.416 | 1.00 | 0.00 | B | O |
| ATOM | 7284 | CD2 | TYR | A 436 | 19.192 | 30.031 | -26.681 | 1.00 | 0.00 | B | C |
| ATOM | 7285 | CE2 | TYR | A 436 | 19.181 | 28.844 | -27.378 | 1.00 | 0.00 | B | C |
| ATOM | 7286 | C   | TYR | A 436 | 17.739 | 32.764 | -23.182 | 1.00 | 0.00 | B | C |
| ATOM | 7287 | O   | TYR | A 436 | 17.549 | 32.459 | -22.006 | 1.00 | 0.00 | B | O |
| ATOM | 7288 | N   | PHE | A 437 | 18.007 | 34.025 | -23.563 | 1.00 | 0.00 | B | N |
| ATOM | 7289 | CA  | PHE | A 437 | 18.105 | 35.070 | -22.588 | 1.00 | 0.00 | B | C |
| ATOM | 7290 | CB  | PHE | A 437 | 18.413 | 36.449 | -23.204 | 1.00 | 0.00 | B | C |
| ATOM | 7291 | CG  | PHE | A 437 | 18.428 | 37.461 | -22.107 | 1.00 | 0.00 | B | C |
| ATOM | 7292 | CD1 | PHE | A 437 | 19.555 | 37.659 | -21.342 | 1.00 | 0.00 | B | C |
| ATOM | 7293 | CE1 | PHE | A 437 | 19.561 | 38.592 | -20.331 | 1.00 | 0.00 | B | C |
| ATOM | 7294 | CZ  | PHE | A 437 | 18.437 | 39.338 | -20.071 | 1.00 | 0.00 | B | C |
| ATOM | 7295 | CD2 | PHE | A 437 | 17.304 | 38.207 | -21.835 | 1.00 | 0.00 | B | C |
| ATOM | 7296 | CE2 | PHE | A 437 | 17.305 | 39.145 | -20.827 | 1.00 | 0.00 | B | C |
| ATOM | 7297 | C   | PHE | A 437 | 16.794 | 35.157 | -21.881 | 1.00 | 0.00 | B | C |
| ATOM | 7298 | O   | PHE | A 437 | 16.751 | 35.295 | -20.661 | 1.00 | 0.00 | B | O |
| ATOM | 7299 | N   | ASN | A 438 | 15.685 | 35.060 | -22.634 | 1.00 | 0.00 | B | N |
| ATOM | 7300 | CA  | ASN | A 438 | 14.391 | 35.169 | -22.027 | 1.00 | 0.00 | B | C |
| ATOM | 7301 | CB  | ASN | A 438 | 13.244 | 34.997 | -23.042 | 1.00 | 0.00 | B | C |
| ATOM | 7302 | CG  | ASN | A 438 | 13.319 | 36.124 | -24.059 | 1.00 | 0.00 | B | C |
| ATOM | 7303 | OD1 | ASN | A 438 | 13.927 | 37.163 | -23.807 | 1.00 | 0.00 | B | O |
| ATOM | 7304 | ND2 | ASN | A 438 | 12.684 | 35.917 | -25.245 | 1.00 | 0.00 | B | N |
| ATOM | 7305 | C   | ASN | A 438 | 14.246 | 34.067 | -21.023 | 1.00 | 0.00 | B | C |
| ATOM | 7306 | O   | ASN | A 438 | 13.803 | 34.296 | -19.899 | 1.00 | 0.00 | B | O |
| ATOM | 7307 | N   | PHE | A 439 | 14.637 | 32.835 | -21.404 | 1.00 | 0.00 | B | N |
| ATOM | 7308 | CA  | PHE | A 439 | 14.484 | 31.689 | -20.551 | 1.00 | 0.00 | B | C |
| ATOM | 7309 | CB  | PHE | A 439 | 14.905 | 30.377 | -21.243 | 1.00 | 0.00 | B | C |
| ATOM | 7310 | CG  | PHE | A 439 | 15.006 | 29.281 | -20.232 | 1.00 | 0.00 | B | C |
| ATOM | 7311 | CD1 | PHE | A 439 | 13.901 | 28.836 | -19.544 | 1.00 | 0.00 | B | C |
| ATOM | 7312 | CE1 | PHE | A 439 | 14.008 | 27.819 | -18.623 | 1.00 | 0.00 | B | C |
| ATOM | 7313 | CZ  | PHE | A 439 | 15.223 | 27.224 | -18.388 | 1.00 | 0.00 | B | C |
| ATOM | 7314 | CD2 | PHE | A 439 | 16.216 | 28.667 | -20.000 | 1.00 | 0.00 | B | C |

|      |      |               |        |        |         |      |      |   |   |
|------|------|---------------|--------|--------|---------|------|------|---|---|
| ATOM | 7315 | CE2 PHE A 439 | 16.330 | 27.649 | -19.081 | 1.00 | 0.00 | B | C |
| ATOM | 7316 | C PHE A 439   | 15.289 | 31.846 | -19.302 | 1.00 | 0.00 | B | C |
| ATOM | 7317 | O PHE A 439   | 14.792 | 31.604 | -18.204 | 1.00 | 0.00 | B | O |
| ATOM | 7318 | N LEU A 440   | 16.558 | 32.270 | -19.431 | 1.00 | 0.00 | B | N |
| ATOM | 7319 | CA LEU A 440  | 17.397 | 32.370 | -18.273 | 1.00 | 0.00 | B | C |
| ATOM | 7320 | CB LEU A 440  | 18.851 | 32.753 | -18.602 | 1.00 | 0.00 | B | C |
| ATOM | 7321 | CG LEU A 440  | 19.584 | 31.679 | -19.429 | 1.00 | 0.00 | B | C |
| ATOM | 7322 | CD1 LEU A 440 | 21.051 | 32.063 | -19.677 | 1.00 | 0.00 | B | C |
| ATOM | 7323 | CD2 LEU A 440 | 19.425 | 30.287 | -18.796 | 1.00 | 0.00 | B | C |
| ATOM | 7324 | C LEU A 440   | 16.846 | 33.399 | -17.339 | 1.00 | 0.00 | B | C |
| ATOM | 7325 | O LEU A 440   | 16.797 | 33.177 | -16.131 | 1.00 | 0.00 | B | O |
| ATOM | 7326 | N VAL A 441   | 16.388 | 34.544 | -17.878 | 1.00 | 0.00 | B | N |
| ATOM | 7327 | CA VAL A 441  | 15.904 | 35.606 | -17.040 | 1.00 | 0.00 | B | C |
| ATOM | 7328 | CB VAL A 441  | 15.449 | 36.809 | -17.807 | 1.00 | 0.00 | B | C |
| ATOM | 7329 | CG1 VAL A 441 | 14.837 | 37.820 | -16.822 | 1.00 | 0.00 | B | C |
| ATOM | 7330 | CG2 VAL A 441 | 16.653 | 37.362 | -18.577 | 1.00 | 0.00 | B | C |
| ATOM | 7331 | C VAL A 441   | 14.727 | 35.113 | -16.261 | 1.00 | 0.00 | B | C |
| ATOM | 7332 | O VAL A 441   | 14.574 | 35.428 | -15.083 | 1.00 | 0.00 | B | O |
| ATOM | 7333 | N TYR A 442   | 13.867 | 34.314 | -16.914 | 1.00 | 0.00 | B | N |
| ATOM | 7334 | CA TYR A 442  | 12.672 | 33.796 | -16.314 | 1.00 | 0.00 | B | C |
| ATOM | 7335 | CB TYR A 442  | 11.864 | 32.959 | -17.321 | 1.00 | 0.00 | B | C |
| ATOM | 7336 | CG TYR A 442  | 10.649 | 32.414 | -16.653 | 1.00 | 0.00 | B | C |
| ATOM | 7337 | CD1 TYR A 442 | 9.482  | 33.143 | -16.615 | 1.00 | 0.00 | B | C |
| ATOM | 7338 | CE1 TYR A 442 | 8.358  | 32.639 | -16.006 | 1.00 | 0.00 | B | C |
| ATOM | 7339 | CZ TYR A 442  | 8.396  | 31.396 | -15.425 | 1.00 | 0.00 | B | C |
| ATOM | 7340 | OH TYR A 442  | 7.247  | 30.872 | -14.795 | 1.00 | 0.00 | B | O |
| ATOM | 7341 | CD2 TYR A 442 | 10.678 | 31.172 | -16.062 | 1.00 | 0.00 | B | C |
| ATOM | 7342 | CE2 TYR A 442 | 9.559  | 30.664 | -15.449 | 1.00 | 0.00 | B | C |
| ATOM | 7343 | C TYR A 442   | 13.039 | 32.921 | -15.155 | 1.00 | 0.00 | B | C |
| ATOM | 7344 | O TYR A 442   | 12.401 | 32.978 | -14.104 | 1.00 | 0.00 | B | O |
| ATOM | 7345 | N CYS A 443   | 14.096 | 32.106 | -15.309 | 1.00 | 0.00 | B | N |
| ATOM | 7346 | CA CYS A 443  | 14.475 | 31.158 | -14.300 | 1.00 | 0.00 | B | C |
| ATOM | 7347 | CB CYS A 443  | 15.724 | 30.354 | -14.689 | 1.00 | 0.00 | B | C |
| ATOM | 7348 | SG CYS A 443  | 15.476 | 29.435 | -16.234 | 1.00 | 0.00 | B | S |
| ATOM | 7349 | C CYS A 443   | 14.796 | 31.876 | -13.023 | 1.00 | 0.00 | B | C |
| ATOM | 7350 | O CYS A 443   | 14.415 | 31.431 | -11.942 | 1.00 | 0.00 | B | O |
| ATOM | 7351 | N LEU A 444   | 15.495 | 33.019 | -13.122 | 1.00 | 0.00 | B | N |
| ATOM | 7352 | CA LEU A 444  | 15.908 | 33.800 | -11.988 | 1.00 | 0.00 | B | C |

|      |      |     |     |       |        |        |         |      |      |   |   |
|------|------|-----|-----|-------|--------|--------|---------|------|------|---|---|
| ATOM | 7353 | CB  | LEU | A 444 | 16.728 | 35.022 | -12.456 | 1.00 | 0.00 | B | C |
| ATOM | 7354 | CG  | LEU | A 444 | 17.167 | 36.024 | -11.373 | 1.00 | 0.00 | B | C |
| ATOM | 7355 | CD1 | LEU | A 444 | 15.988 | 36.882 | -10.892 | 1.00 | 0.00 | B | C |
| ATOM | 7356 | CD2 | LEU | A 444 | 17.914 | 35.328 | -10.228 | 1.00 | 0.00 | B | C |
| ATOM | 7357 | C   | LEU | A 444 | 14.686 | 34.263 | -11.253 | 1.00 | 0.00 | B | C |
| ATOM | 7358 | O   | LEU | A 444 | 14.640 | 34.292 | -10.025 | 1.00 | 0.00 | B | O |
| ATOM | 7359 | N   | TYR | A 445 | 13.639 | 34.633 | -11.995 | 1.00 | 0.00 | B | N |
| ATOM | 7360 | CA  | TYR | A 445 | 12.443 | 35.102 | -11.372 | 1.00 | 0.00 | B | C |
| ATOM | 7361 | CB  | TYR | A 445 | 11.402 | 35.496 | -12.440 | 1.00 | 0.00 | B | C |
| ATOM | 7362 | CG  | TYR | A 445 | 10.061 | 35.718 | -11.833 | 1.00 | 0.00 | B | C |
| ATOM | 7363 | CD1 | TYR | A 445 | 9.732  | 36.924 | -11.261 | 1.00 | 0.00 | B | C |
| ATOM | 7364 | CE1 | TYR | A 445 | 8.487  | 37.117 | -10.707 | 1.00 | 0.00 | B | C |
| ATOM | 7365 | CZ  | TYR | A 445 | 7.559  | 36.102 | -10.720 | 1.00 | 0.00 | B | C |
| ATOM | 7366 | OH  | TYR | A 445 | 6.282  | 36.300 | -10.155 | 1.00 | 0.00 | B | O |
| ATOM | 7367 | CD2 | TYR | A 445 | 9.125  | 34.707 | -11.837 | 1.00 | 0.00 | B | C |
| ATOM | 7368 | CE2 | TYR | A 445 | 7.879  | 34.895 | -11.286 | 1.00 | 0.00 | B | C |
| ATOM | 7369 | C   | TYR | A 445 | 11.899 | 34.005 | -10.514 | 1.00 | 0.00 | B | C |
| ATOM | 7370 | O   | TYR | A 445 | 11.447 | 34.236 | -9.394  | 1.00 | 0.00 | B | O |
| ATOM | 7371 | N   | MET | A 446 | 11.942 | 32.767 | -11.031 | 1.00 | 0.00 | B | N |
| ATOM | 7372 | CA  | MET | A 446 | 11.377 | 31.639 | -10.351 | 1.00 | 0.00 | B | C |
| ATOM | 7373 | CB  | MET | A 446 | 11.425 | 30.371 | -11.212 | 1.00 | 0.00 | B | C |
| ATOM | 7374 | CG  | MET | A 446 | 10.743 | 30.576 | -12.564 | 1.00 | 0.00 | B | C |
| ATOM | 7375 | SD  | MET | A 446 | 9.130  | 31.399 | -12.449 | 1.00 | 0.00 | B | S |
| ATOM | 7376 | CE  | MET | A 446 | 8.456  | 30.306 | -11.169 | 1.00 | 0.00 | B | C |
| ATOM | 7377 | C   | MET | A 446 | 12.100 | 31.359 | -9.071  | 1.00 | 0.00 | B | C |
| ATOM | 7378 | O   | MET | A 446 | 11.476 | 31.068 | -8.052  | 1.00 | 0.00 | B | O |
| ATOM | 7379 | N   | ILE | A 447 | 13.442 | 31.441 | -9.082  | 1.00 | 0.00 | B | N |
| ATOM | 7380 | CA  | ILE | A 447 | 14.205 | 31.109 | -7.920  | 1.00 | 0.00 | B | C |
| ATOM | 7381 | CB  | ILE | A 447 | 15.682 | 31.120 | -8.185  | 1.00 | 0.00 | B | C |
| ATOM | 7382 | CG2 | ILE | A 447 | 15.966 | 30.051 | -9.254  | 1.00 | 0.00 | B | C |
| ATOM | 7383 | CG1 | ILE | A 447 | 16.137 | 32.524 | -8.589  | 1.00 | 0.00 | B | C |
| ATOM | 7384 | CD  | ILE | A 447 | 17.626 | 32.650 | -8.886  | 1.00 | 0.00 | B | C |
| ATOM | 7385 | C   | ILE | A 447 | 13.867 | 32.077 | -6.827  | 1.00 | 0.00 | B | C |
| ATOM | 7386 | O   | ILE | A 447 | 13.746 | 31.693 | -5.663  | 1.00 | 0.00 | B | O |
| ATOM | 7387 | N   | ILE | A 448 | 13.708 | 33.362 | -7.175  | 1.00 | 0.00 | B | N |
| ATOM | 7388 | CA  | ILE | A 448 | 13.404 | 34.373 | -6.206  | 1.00 | 0.00 | B | C |
| ATOM | 7389 | CB  | ILE | A 448 | 13.380 | 35.748 | -6.793  | 1.00 | 0.00 | B | C |
| ATOM | 7390 | CG2 | ILE | A 448 | 12.937 | 36.732 | -5.698  | 1.00 | 0.00 | B | C |

|      |      |     |     |       |        |        |        |      |      |   |   |
|------|------|-----|-----|-------|--------|--------|--------|------|------|---|---|
| ATOM | 7391 | CG1 | ILE | A 448 | 14.749 | 36.080 | -7.393 | 1.00 | 0.00 | B | C |
| ATOM | 7392 | CD  | ILE | A 448 | 14.704 | 37.313 | -8.281 | 1.00 | 0.00 | B | C |
| ATOM | 7393 | C   | ILE | A 448 | 12.044 | 34.153 | -5.611 | 1.00 | 0.00 | B | C |
| ATOM | 7394 | O   | ILE | A 448 | 11.865 | 34.282 | -4.401 | 1.00 | 0.00 | B | O |
| ATOM | 7395 | N   | PHE | A 449 | 11.042 | 33.816 | -6.445 | 1.00 | 0.00 | B | N |
| ATOM | 7396 | CA  | PHE | A 449 | 9.692  | 33.692 | -5.962 | 1.00 | 0.00 | B | C |
| ATOM | 7397 | CB  | PHE | A 449 | 8.704  | 33.305 | -7.080 | 1.00 | 0.00 | B | C |
| ATOM | 7398 | CG  | PHE | A 449 | 7.301  | 33.422 | -6.575 | 1.00 | 0.00 | B | C |
| ATOM | 7399 | CD1 | PHE | A 449 | 6.751  | 32.452 | -5.771 | 1.00 | 0.00 | B | C |
| ATOM | 7400 | CE1 | PHE | A 449 | 5.455  | 32.563 | -5.319 | 1.00 | 0.00 | B | C |
| ATOM | 7401 | CZ  | PHE | A 449 | 4.692  | 33.650 | -5.670 | 1.00 | 0.00 | B | C |
| ATOM | 7402 | CD2 | PHE | A 449 | 6.525  | 34.506 | -6.927 | 1.00 | 0.00 | B | C |
| ATOM | 7403 | CE2 | PHE | A 449 | 5.230  | 34.623 | -6.479 | 1.00 | 0.00 | B | C |
| ATOM | 7404 | C   | PHE | A 449 | 9.652  | 32.607 | -4.930 | 1.00 | 0.00 | B | C |
| ATOM | 7405 | O   | PHE | A 449 | 9.032  | 32.760 | -3.878 | 1.00 | 0.00 | B | O |
| ATOM | 7406 | N   | THR | A 450 | 10.298 | 31.465 | -5.228 | 1.00 | 0.00 | B | N |
| ATOM | 7407 | CA  | THR | A 450 | 10.333 | 30.343 | -4.338 | 1.00 | 0.00 | B | C |
| ATOM | 7408 | CB  | THR | A 450 | 10.900 | 29.112 | -4.985 | 1.00 | 0.00 | B | C |
| ATOM | 7409 | OG1 | THR | A 450 | 10.715 | 27.984 | -4.141 | 1.00 | 0.00 | B | O |
| ATOM | 7410 | CG2 | THR | A 450 | 12.397 | 29.333 | -5.266 | 1.00 | 0.00 | B | C |
| ATOM | 7411 | C   | THR | A 450 | 11.154 | 30.653 | -3.126 | 1.00 | 0.00 | B | C |
| ATOM | 7412 | O   | THR | A 450 | 10.792 | 30.267 | -2.021 | 1.00 | 0.00 | B | O |
| ATOM | 7413 | N   | MET | A 451 | 12.290 | 31.358 | -3.293 | 1.00 | 0.00 | B | N |
| ATOM | 7414 | CA  | MET | A 451 | 13.155 | 31.592 | -2.170 | 1.00 | 0.00 | B | C |
| ATOM | 7415 | CB  | MET | A 451 | 14.449 | 32.337 | -2.534 | 1.00 | 0.00 | B | C |
| ATOM | 7416 | CG  | MET | A 451 | 15.451 | 31.470 | -3.295 | 1.00 | 0.00 | B | C |
| ATOM | 7417 | SD  | MET | A 451 | 17.031 | 32.292 | -3.655 | 1.00 | 0.00 | B | S |
| ATOM | 7418 | CE  | MET | A 451 | 17.859 | 30.778 | -4.220 | 1.00 | 0.00 | B | C |
| ATOM | 7419 | C   | MET | A 451 | 12.460 | 32.401 | -1.122 | 1.00 | 0.00 | B | C |
| ATOM | 7420 | O   | MET | A 451 | 12.528 | 32.078 | 0.062  | 1.00 | 0.00 | B | O |
| ATOM | 7421 | N   | ALA | A 452 | 11.765 | 33.478 | -1.524 | 1.00 | 0.00 | B | N |
| ATOM | 7422 | CA  | ALA | A 452 | 11.115 | 34.289 | -0.541 | 1.00 | 0.00 | B | C |
| ATOM | 7423 | CB  | ALA | A 452 | 10.403 | 35.509 | -1.145 | 1.00 | 0.00 | B | C |
| ATOM | 7424 | C   | ALA | A 452 | 10.072 | 33.454 | 0.123  | 1.00 | 0.00 | B | C |
| ATOM | 7425 | O   | ALA | A 452 | 9.920  | 33.483 | 1.342  | 1.00 | 0.00 | B | O |
| ATOM | 7426 | N   | ALA | A 453 | 9.334  | 32.664 | -0.676 | 1.00 | 0.00 | B | N |
| ATOM | 7427 | CA  | ALA | A 453 | 8.264  | 31.859 | -0.160 | 1.00 | 0.00 | B | C |
| ATOM | 7428 | CB  | ALA | A 453 | 7.516  | 31.095 | -1.268 | 1.00 | 0.00 | B | C |



|      |      |     |           |        |        |       |      |      |   |   |
|------|------|-----|-----------|--------|--------|-------|------|------|---|---|
| ATOM | 7429 | C   | ALA A 453 | 8.810  | 30.846 | 0.799 | 1.00 | 0.00 | B | C |
| ATOM | 7430 | O   | ALA A 453 | 8.244  | 30.625 | 1.867 | 1.00 | 0.00 | B | O |
| ATOM | 7431 | N   | TYR A 454 | 9.938  | 30.206 | 0.440 | 1.00 | 0.00 | B | N |
| ATOM | 7432 | CA  | TYR A 454 | 10.535 | 29.190 | 1.260 | 1.00 | 0.00 | B | C |
| ATOM | 7433 | CB  | TYR A 454 | 11.780 | 28.570 | 0.600 | 1.00 | 0.00 | B | C |
| ATOM | 7434 | CG  | TYR A 454 | 12.469 | 27.729 | 1.621 | 1.00 | 0.00 | B | C |
| ATOM | 7435 | CD1 | TYR A 454 | 12.085 | 26.427 | 1.844 | 1.00 | 0.00 | B | C |
| ATOM | 7436 | CE1 | TYR A 454 | 12.728 | 25.662 | 2.789 | 1.00 | 0.00 | B | C |
| ATOM | 7437 | CZ  | TYR A 454 | 13.762 | 26.196 | 3.519 | 1.00 | 0.00 | B | C |
| ATOM | 7438 | OH  | TYR A 454 | 14.418 | 25.406 | 4.487 | 1.00 | 0.00 | B | O |
| ATOM | 7439 | CD2 | TYR A 454 | 13.504 | 28.256 | 2.358 | 1.00 | 0.00 | B | C |
| ATOM | 7440 | CE2 | TYR A 454 | 14.150 | 27.498 | 3.304 | 1.00 | 0.00 | B | C |
| ATOM | 7441 | C   | TYR A 454 | 10.988 | 29.802 | 2.554 | 1.00 | 0.00 | B | C |
| ATOM | 7442 | O   | TYR A 454 | 10.741 | 29.268 | 3.633 | 1.00 | 0.00 | B | O |
| ATOM | 7443 | N   | TYR A 455 | 11.679 | 30.947 | 2.448 | 1.00 | 0.00 | B | N |
| ATOM | 7444 | CA  | TYR A 455 | 12.263 | 31.707 | 3.518 | 1.00 | 0.00 | B | C |
| ATOM | 7445 | CB  | TYR A 455 | 13.326 | 32.725 | 3.068 | 1.00 | 0.00 | B | C |
| ATOM | 7446 | CG  | TYR A 455 | 14.542 | 31.959 | 2.680 | 1.00 | 0.00 | B | C |
| ATOM | 7447 | CD1 | TYR A 455 | 15.298 | 31.327 | 3.643 | 1.00 | 0.00 | B | C |
| ATOM | 7448 | CE1 | TYR A 455 | 16.425 | 30.621 | 3.299 | 1.00 | 0.00 | B | C |
| ATOM | 7449 | CZ  | TYR A 455 | 16.814 | 30.548 | 1.984 | 1.00 | 0.00 | B | C |
| ATOM | 7450 | OH  | TYR A 455 | 17.972 | 29.825 | 1.625 | 1.00 | 0.00 | B | O |
| ATOM | 7451 | CD2 | TYR A 455 | 14.944 | 31.889 | 1.368 | 1.00 | 0.00 | B | C |
| ATOM | 7452 | CE2 | TYR A 455 | 16.071 | 31.186 | 1.018 | 1.00 | 0.00 | B | C |
| ATOM | 7453 | C   | TYR A 455 | 11.270 | 32.450 | 4.363 | 1.00 | 0.00 | B | C |
| ATOM | 7454 | O   | TYR A 455 | 11.621 | 32.845 | 5.472 | 1.00 | 0.00 | B | O |
| ATOM | 7455 | N   | ARG A 456 | 10.059 | 32.747 | 3.847 | 1.00 | 0.00 | B | N |
| ATOM | 7456 | CA  | ARG A 456 | 9.106  | 33.614 | 4.500 | 1.00 | 0.00 | B | C |
| ATOM | 7457 | CB  | ARG A 456 | 7.676  | 33.535 | 3.934 | 1.00 | 0.00 | B | C |
| ATOM | 7458 | CG  | ARG A 456 | 7.058  | 32.142 | 4.080 | 1.00 | 0.00 | B | C |
| ATOM | 7459 | CD  | ARG A 456 | 5.542  | 32.092 | 3.878 | 1.00 | 0.00 | B | C |
| ATOM | 7460 | NE  | ARG A 456 | 4.887  | 32.535 | 5.140 | 1.00 | 0.00 | B | N |
| ATOM | 7461 | CZ  | ARG A 456 | 3.701  | 33.212 | 5.093 | 1.00 | 0.00 | B | C |
| ATOM | 7462 | NH1 | ARG A 456 | 3.156  | 33.532 | 3.884 | 1.00 | 0.00 | B | N |
| ATOM | 7463 | NH2 | ARG A 456 | 3.065  | 33.567 | 6.247 | 1.00 | 0.00 | B | N |
| ATOM | 7464 | C   | ARG A 456 | 8.969  | 33.307 | 5.960 | 1.00 | 0.00 | B | C |
| ATOM | 7465 | O   | ARG A 456 | 8.947  | 32.154 | 6.390 | 1.00 | 0.00 | B | O |
| ATOM | 7466 | N   | PRO A 457 | 8.923  | 34.376 | 6.726 | 1.00 | 0.00 | B | N |

|      |      |     |           |        |        |        |      |      |   |   |
|------|------|-----|-----------|--------|--------|--------|------|------|---|---|
| ATOM | 7467 | CD  | PRO A 457 | 9.690  | 35.558 | 6.371  | 1.00 | 0.00 | B | C |
| ATOM | 7468 | CA  | PRO A 457 | 8.749  | 34.265 | 8.150  | 1.00 | 0.00 | B | C |
| ATOM | 7469 | CB  | PRO A 457 | 9.193  | 35.601 | 8.743  | 1.00 | 0.00 | B | C |
| ATOM | 7470 | CG  | PRO A 457 | 10.175 | 36.155 | 7.701  | 1.00 | 0.00 | B | C |
| ATOM | 7471 | C   | PRO A 457 | 7.342  | 33.913 | 8.515  | 1.00 | 0.00 | B | C |
| ATOM | 7472 | O   | PRO A 457 | 6.415  | 34.503 | 7.960  | 1.00 | 0.00 | B | O |
| ATOM | 7473 | N   | VAL A 458 | 7.171  | 32.979 | 9.472  | 1.00 | 0.00 | B | N |
| ATOM | 7474 | CA  | VAL A 458 | 5.880  | 32.542 | 9.922  | 1.00 | 0.00 | B | C |
| ATOM | 7475 | CB  | VAL A 458 | 5.971  | 31.370 | 10.852 | 1.00 | 0.00 | B | C |
| ATOM | 7476 | CG1 | VAL A 458 | 4.568  | 31.057 | 11.399 | 1.00 | 0.00 | B | C |
| ATOM | 7477 | CG2 | VAL A 458 | 6.619  | 30.203 | 10.085 | 1.00 | 0.00 | B | C |
| ATOM | 7478 | C   | VAL A 458 | 5.202  | 33.654 | 10.649 | 1.00 | 0.00 | B | C |
| ATOM | 7479 | O   | VAL A 458 | 4.024  | 33.917 | 10.403 | 1.00 | 0.00 | B | O |
| ATOM | 7480 | N   | ASP A 459 | 5.980  | 34.335 | 11.521 | 1.00 | 0.00 | B | N |
| ATOM | 7481 | CA  | ASP A 459 | 5.609  | 35.403 | 12.405 | 1.00 | 0.00 | B | C |
| ATOM | 7482 | CB  | ASP A 459 | 5.977  | 36.794 | 11.866 | 1.00 | 0.00 | B | C |
| ATOM | 7483 | CG  | ASP A 459 | 7.493  | 36.914 | 11.894 | 1.00 | 0.00 | B | C |
| ATOM | 7484 | OD1 | ASP A 459 | 8.098  | 36.527 | 12.928 | 1.00 | 0.00 | B | O |
| ATOM | 7485 | OD2 | ASP A 459 | 8.065  | 37.402 | 10.880 | 1.00 | 0.00 | B | O |
| ATOM | 7486 | C   | ASP A 459 | 4.160  | 35.382 | 12.684 | 1.00 | 0.00 | B | C |
| ATOM | 7487 | O   | ASP A 459 | 3.600  | 34.392 | 13.159 | 1.00 | 0.00 | B | O |
| ATOM | 7488 | N   | GLY A 460 | 3.570  | 36.554 | 12.427 | 1.00 | 0.00 | B | N |
| ATOM | 7489 | CA  | GLY A 460 | 2.183  | 36.822 | 12.468 | 1.00 | 0.00 | B | C |
| ATOM | 7490 | C   | GLY A 460 | 1.825  | 36.857 | 11.025 | 1.00 | 0.00 | B | C |
| ATOM | 7491 | O   | GLY A 460 | 2.165  | 35.938 | 10.279 | 1.00 | 0.00 | B | O |
| ATOM | 7492 | N   | LEU A 461 | 1.137  | 37.927 | 10.592 | 1.00 | 0.00 | B | N |
| ATOM | 7493 | CA  | LEU A 461 | 0.727  | 38.061 | 9.227  | 1.00 | 0.00 | B | C |
| ATOM | 7494 | CB  | LEU A 461 | -0.745 | 38.467 | 9.132  | 1.00 | 0.00 | B | C |
| ATOM | 7495 | CG  | LEU A 461 | -1.715 | 37.415 | 9.712  | 1.00 | 0.00 | B | C |
| ATOM | 7496 | CD1 | LEU A 461 | -1.520 | 37.223 | 11.225 | 1.00 | 0.00 | B | C |
| ATOM | 7497 | CD2 | LEU A 461 | -3.171 | 37.745 | 9.367  | 1.00 | 0.00 | B | C |
| ATOM | 7498 | C   | LEU A 461 | 1.588  | 39.125 | 8.620  | 1.00 | 0.00 | B | C |
| ATOM | 7499 | O   | LEU A 461 | 1.991  | 40.040 | 9.325  | 1.00 | 0.00 | B | O |
| ATOM | 7500 | N   | PRO A 462 | 1.764  | 39.136 | 7.330  | 1.00 | 0.00 | B | N |
| ATOM | 7501 | CD  | PRO A 462 | 0.598  | 39.015 | 6.468  | 1.00 | 0.00 | B | C |
| ATOM | 7502 | CA  | PRO A 462 | 2.839  | 39.854 | 6.678  | 1.00 | 0.00 | B | C |
| ATOM | 7503 | CB  | PRO A 462 | 2.403  | 40.021 | 5.224  | 1.00 | 0.00 | B | C |
| ATOM | 7504 | CG  | PRO A 462 | 0.870  | 39.955 | 5.286  | 1.00 | 0.00 | B | C |

|      |      |     |           |        |        |        |      |      |   |   |
|------|------|-----|-----------|--------|--------|--------|------|------|---|---|
| ATOM | 7505 | C   | PRO A 462 | 3.437  | 41.106 | 7.268  | 1.00 | 0.00 | B | C |
| ATOM | 7506 | O   | PRO A 462 | 4.598  | 40.944 | 7.657  | 1.00 | 0.00 | B | O |
| ATOM | 7507 | N   | PRO A 463 | 2.889  | 42.287 | 7.406  | 1.00 | 0.00 | B | N |
| ATOM | 7508 | CD  | PRO A 463 | 1.951  | 42.837 | 6.441  | 1.00 | 0.00 | B | C |
| ATOM | 7509 | CA  | PRO A 463 | 3.648  | 43.322 | 8.065  | 1.00 | 0.00 | B | C |
| ATOM | 7510 | CB  | PRO A 463 | 3.148  | 44.652 | 7.501  | 1.00 | 0.00 | B | C |
| ATOM | 7511 | CG  | PRO A 463 | 1.793  | 44.307 | 6.863  | 1.00 | 0.00 | B | C |
| ATOM | 7512 | C   | PRO A 463 | 3.399  | 43.173 | 9.522  | 1.00 | 0.00 | B | C |
| ATOM | 7513 | O   | PRO A 463 | 2.397  | 42.552 | 9.873  | 1.00 | 0.00 | B | O |
| ATOM | 7514 | N   | PHE A 464 | 4.262  | 43.743 | 10.385 | 1.00 | 0.00 | B | N |
| ATOM | 7515 | CA  | PHE A 464 | 5.397  | 44.479 | 9.927  | 1.00 | 0.00 | B | C |
| ATOM | 7516 | CB  | PHE A 464 | 5.796  | 45.655 | 10.836 | 1.00 | 0.00 | B | C |
| ATOM | 7517 | CG  | PHE A 464 | 4.801  | 46.735 | 10.574 | 1.00 | 0.00 | B | C |
| ATOM | 7518 | CD1 | PHE A 464 | 3.583  | 46.753 | 11.214 | 1.00 | 0.00 | B | C |
| ATOM | 7519 | CE1 | PHE A 464 | 2.673  | 47.752 | 10.957 | 1.00 | 0.00 | B | C |
| ATOM | 7520 | CZ  | PHE A 464 | 2.970  | 48.743 | 10.053 | 1.00 | 0.00 | B | C |
| ATOM | 7521 | CD2 | PHE A 464 | 5.089  | 47.730 | 9.667  | 1.00 | 0.00 | B | C |
| ATOM | 7522 | CE2 | PHE A 464 | 4.181  | 48.731 | 9.408  | 1.00 | 0.00 | B | C |
| ATOM | 7523 | C   | PHE A 464 | 6.564  | 43.561 | 9.761  | 1.00 | 0.00 | B | C |
| ATOM | 7524 | O   | PHE A 464 | 6.605  | 42.470 | 10.325 | 1.00 | 0.00 | B | O |
| ATOM | 7525 | N   | LYS A 465 | 7.527  | 43.992 | 8.923  | 1.00 | 0.00 | B | N |
| ATOM | 7526 | CA  | LYS A 465 | 8.715  | 43.231 | 8.663  | 1.00 | 0.00 | B | C |
| ATOM | 7527 | CB  | LYS A 465 | 9.021  | 43.091 | 7.162  | 1.00 | 0.00 | B | C |
| ATOM | 7528 | CG  | LYS A 465 | 7.928  | 42.373 | 6.370  | 1.00 | 0.00 | B | C |
| ATOM | 7529 | CD  | LYS A 465 | 8.064  | 42.549 | 4.857  | 1.00 | 0.00 | B | C |
| ATOM | 7530 | CE  | LYS A 465 | 7.830  | 43.984 | 4.383  | 1.00 | 0.00 | B | C |
| ATOM | 7531 | NZ  | LYS A 465 | 6.405  | 44.351 | 4.552  | 1.00 | 0.00 | B | N |
| ATOM | 7532 | C   | LYS A 465 | 9.870  | 43.993 | 9.253  | 1.00 | 0.00 | B | C |
| ATOM | 7533 | O   | LYS A 465 | 9.911  | 45.219 | 9.179  | 1.00 | 0.00 | B | O |
| ATOM | 7534 | N   | MET A 466 | 10.833 | 43.271 | 9.869  | 1.00 | 0.00 | B | N |
| ATOM | 7535 | CA  | MET A 466 | 11.981 | 43.858 | 10.508 | 1.00 | 0.00 | B | C |
| ATOM | 7536 | CB  | MET A 466 | 12.853 | 42.812 | 11.228 | 1.00 | 0.00 | B | C |
| ATOM | 7537 | CG  | MET A 466 | 12.126 | 41.985 | 12.297 | 1.00 | 0.00 | B | C |
| ATOM | 7538 | SD  | MET A 466 | 13.204 | 40.796 | 13.158 | 1.00 | 0.00 | B | S |
| ATOM | 7539 | CE  | MET A 466 | 11.917 | 39.636 | 13.705 | 1.00 | 0.00 | B | C |
| ATOM | 7540 | C   | MET A 466 | 12.868 | 44.512 | 9.488  | 1.00 | 0.00 | B | C |
| ATOM | 7541 | O   | MET A 466 | 13.337 | 45.631 | 9.689  | 1.00 | 0.00 | B | O |
| ATOM | 7542 | N   | GLU A 467 | 13.101 | 43.835 | 8.348  | 1.00 | 0.00 | B | N |

|      |      |     |           |        |        |        |      |      |   |   |
|------|------|-----|-----------|--------|--------|--------|------|------|---|---|
| ATOM | 7543 | CA  | GLU A 467 | 13.978 | 44.367 | 7.346  | 1.00 | 0.00 | B | C |
| ATOM | 7544 | CB  | GLU A 467 | 13.550 | 45.757 | 6.856  | 1.00 | 0.00 | B | C |
| ATOM | 7545 | CG  | GLU A 467 | 12.235 | 45.771 | 6.084  | 1.00 | 0.00 | B | C |
| ATOM | 7546 | CD  | GLU A 467 | 11.989 | 47.218 | 5.689  | 1.00 | 0.00 | B | C |
| ATOM | 7547 | OE1 | GLU A 467 | 12.953 | 48.021 | 5.806  | 1.00 | 0.00 | B | O |
| ATOM | 7548 | OE2 | GLU A 467 | 10.848 | 47.542 | 5.265  | 1.00 | 0.00 | B | O |
| ATOM | 7549 | C   | GLU A 467 | 15.356 | 44.528 | 7.923  | 1.00 | 0.00 | B | C |
| ATOM | 7550 | O   | GLU A 467 | 16.075 | 45.461 | 7.566  | 1.00 | 0.00 | B | O |
| ATOM | 7551 | N   | LYS A 468 | 15.780 | 43.612 | 8.817  | 1.00 | 0.00 | B | N |
| ATOM | 7552 | CA  | LYS A 468 | 17.098 | 43.672 | 9.390  | 1.00 | 0.00 | B | C |
| ATOM | 7553 | CB  | LYS A 468 | 17.158 | 43.267 | 10.873 | 1.00 | 0.00 | B | C |
| ATOM | 7554 | CG  | LYS A 468 | 16.595 | 44.353 | 11.793 | 1.00 | 0.00 | B | C |
| ATOM | 7555 | CD  | LYS A 468 | 17.328 | 45.689 | 11.639 | 1.00 | 0.00 | B | C |
| ATOM | 7556 | CE  | LYS A 468 | 16.764 | 46.829 | 12.493 | 1.00 | 0.00 | B | C |
| ATOM | 7557 | NZ  | LYS A 468 | 17.531 | 48.073 | 12.244 | 1.00 | 0.00 | B | N |
| ATOM | 7558 | C   | LYS A 468 | 17.985 | 42.753 | 8.602  | 1.00 | 0.00 | B | C |
| ATOM | 7559 | O   | LYS A 468 | 17.659 | 42.387 | 7.481  | 1.00 | 0.00 | B | O |
| ATOM | 7560 | N   | THR A 469 | 19.153 | 42.373 | 9.156  | 1.00 | 0.00 | B | N |
| ATOM | 7561 | CA  | THR A 469 | 20.053 | 41.539 | 8.405  | 1.00 | 0.00 | B | C |
| ATOM | 7562 | CB  | THR A 469 | 21.304 | 41.185 | 9.152  | 1.00 | 0.00 | B | C |
| ATOM | 7563 | OG1 | THR A 469 | 22.209 | 40.500 | 8.298  | 1.00 | 0.00 | B | O |
| ATOM | 7564 | CG2 | THR A 469 | 20.927 | 40.301 | 10.354 | 1.00 | 0.00 | B | C |
| ATOM | 7565 | C   | THR A 469 | 19.346 | 40.268 | 8.067  | 1.00 | 0.00 | B | C |
| ATOM | 7566 | O   | THR A 469 | 18.515 | 39.773 | 8.825  | 1.00 | 0.00 | B | O |
| ATOM | 7567 | N   | GLY A 470 | 19.576 | 39.746 | 6.845  | 1.00 | 0.00 | B | N |
| ATOM | 7568 | CA  | GLY A 470 | 18.966 | 38.513 | 6.426  | 1.00 | 0.00 | B | C |
| ATOM | 7569 | C   | GLY A 470 | 17.606 | 38.867 | 5.933  | 1.00 | 0.00 | B | C |
| ATOM | 7570 | O   | GLY A 470 | 17.077 | 38.257 | 5.004  | 1.00 | 0.00 | B | O |
| ATOM | 7571 | N   | ASP A 471 | 17.005 | 39.869 | 6.597  | 1.00 | 0.00 | B | N |
| ATOM | 7572 | CA  | ASP A 471 | 15.747 | 40.432 | 6.262  | 1.00 | 0.00 | B | C |
| ATOM | 7573 | CB  | ASP A 471 | 15.128 | 41.298 | 7.361  | 1.00 | 0.00 | B | C |
| ATOM | 7574 | CG  | ASP A 471 | 14.676 | 40.366 | 8.476  | 1.00 | 0.00 | B | C |
| ATOM | 7575 | OD1 | ASP A 471 | 14.736 | 39.123 | 8.270  | 1.00 | 0.00 | B | O |
| ATOM | 7576 | OD2 | ASP A 471 | 14.262 | 40.885 | 9.546  | 1.00 | 0.00 | B | O |
| ATOM | 7577 | C   | ASP A 471 | 15.945 | 41.258 | 5.044  | 1.00 | 0.00 | B | C |
| ATOM | 7578 | O   | ASP A 471 | 15.001 | 41.535 | 4.316  | 1.00 | 0.00 | B | O |
| ATOM | 7579 | N   | TYR A 472 | 17.181 | 41.736 | 4.826  | 1.00 | 0.00 | B | N |
| ATOM | 7580 | CA  | TYR A 472 | 17.423 | 42.564 | 3.684  | 1.00 | 0.00 | B | C |

|      |      |     |     |       |        |        |        |      |      |   |   |
|------|------|-----|-----|-------|--------|--------|--------|------|------|---|---|
| ATOM | 7581 | CB  | TYR | A 472 | 18.847 | 43.150 | 3.692  | 1.00 | 0.00 | B | C |
| ATOM | 7582 | CG  | TYR | A 472 | 18.983 | 44.131 | 2.578  | 1.00 | 0.00 | B | C |
| ATOM | 7583 | CD1 | TYR | A 472 | 18.379 | 45.367 | 2.656  | 1.00 | 0.00 | B | C |
| ATOM | 7584 | CE1 | TYR | A 472 | 18.506 | 46.281 | 1.635  | 1.00 | 0.00 | B | C |
| ATOM | 7585 | CZ  | TYR | A 472 | 19.247 | 45.967 | 0.522  | 1.00 | 0.00 | B | C |
| ATOM | 7586 | OH  | TYR | A 472 | 19.383 | 46.900 | -0.528 | 1.00 | 0.00 | B | O |
| ATOM | 7587 | CD2 | TYR | A 472 | 19.732 | 43.832 | 1.464  | 1.00 | 0.00 | B | C |
| ATOM | 7588 | CE2 | TYR | A 472 | 19.862 | 44.741 | 0.439  | 1.00 | 0.00 | B | C |
| ATOM | 7589 | C   | TYR | A 472 | 17.231 | 41.755 | 2.434  | 1.00 | 0.00 | B | C |
| ATOM | 7590 | O   | TYR | A 472 | 16.550 | 42.193 | 1.508  | 1.00 | 0.00 | B | O |
| ATOM | 7591 | N   | PHE | A 473 | 17.808 | 40.537 | 2.382  | 1.00 | 0.00 | B | N |
| ATOM | 7592 | CA  | PHE | A 473 | 17.740 | 39.728 | 1.194  | 1.00 | 0.00 | B | C |
| ATOM | 7593 | CB  | PHE | A 473 | 18.563 | 38.428 | 1.261  | 1.00 | 0.00 | B | C |
| ATOM | 7594 | CG  | PHE | A 473 | 20.001 | 38.763 | 1.100  | 1.00 | 0.00 | B | C |
| ATOM | 7595 | CD1 | PHE | A 473 | 20.502 | 39.049 | -0.148 | 1.00 | 0.00 | B | C |
| ATOM | 7596 | CE1 | PHE | A 473 | 21.832 | 39.353 | -0.318 | 1.00 | 0.00 | B | C |
| ATOM | 7597 | CZ  | PHE | A 473 | 22.672 | 39.367 | 0.768  | 1.00 | 0.00 | B | C |
| ATOM | 7598 | CD2 | PHE | A 473 | 20.852 | 38.771 | 2.182  | 1.00 | 0.00 | B | C |
| ATOM | 7599 | CE2 | PHE | A 473 | 22.183 | 39.074 | 2.017  | 1.00 | 0.00 | B | C |
| ATOM | 7600 | C   | PHE | A 473 | 16.338 | 39.300 | 0.887  | 1.00 | 0.00 | B | C |
| ATOM | 7601 | O   | PHE | A 473 | 15.901 | 39.386 | -0.259 | 1.00 | 0.00 | B | O |
| ATOM | 7602 | N   | ARG | A 474 | 15.596 | 38.815 | 1.898  | 1.00 | 0.00 | B | N |
| ATOM | 7603 | CA  | ARG | A 474 | 14.288 | 38.288 | 1.639  | 1.00 | 0.00 | B | C |
| ATOM | 7604 | CB  | ARG | A 474 | 13.640 | 37.629 | 2.865  | 1.00 | 0.00 | B | C |
| ATOM | 7605 | CG  | ARG | A 474 | 13.369 | 38.582 | 4.027  | 1.00 | 0.00 | B | C |
| ATOM | 7606 | CD  | ARG | A 474 | 12.773 | 37.867 | 5.239  | 1.00 | 0.00 | B | C |
| ATOM | 7607 | NE  | ARG | A 474 | 12.235 | 38.908 | 6.157  | 1.00 | 0.00 | B | N |
| ATOM | 7608 | CZ  | ARG | A 474 | 10.938 | 39.308 | 6.028  | 1.00 | 0.00 | B | C |
| ATOM | 7609 | NH1 | ARG | A 474 | 10.136 | 38.729 | 5.088  | 1.00 | 0.00 | B | N |
| ATOM | 7610 | NH2 | ARG | A 474 | 10.443 | 40.290 | 6.837  | 1.00 | 0.00 | B | N |
| ATOM | 7611 | C   | ARG | A 474 | 13.368 | 39.372 | 1.163  | 1.00 | 0.00 | B | C |
| ATOM | 7612 | O   | ARG | A 474 | 12.563 | 39.154 | 0.257  | 1.00 | 0.00 | B | O |
| ATOM | 7613 | N   | VAL | A 475 | 13.469 | 40.574 | 1.755  | 1.00 | 0.00 | B | N |
| ATOM | 7614 | CA  | VAL | A 475 | 12.597 | 41.664 | 1.407  | 1.00 | 0.00 | B | C |
| ATOM | 7615 | CB  | VAL | A 475 | 12.838 | 42.901 | 2.219  | 1.00 | 0.00 | B | C |
| ATOM | 7616 | CG1 | VAL | A 475 | 11.948 | 44.022 | 1.658  | 1.00 | 0.00 | B | C |
| ATOM | 7617 | CG2 | VAL | A 475 | 12.546 | 42.586 | 3.695  | 1.00 | 0.00 | B | C |
| ATOM | 7618 | C   | VAL | A 475 | 12.789 | 42.022 | -0.031 | 1.00 | 0.00 | B | C |

|      |      |     |           |        |        |        |      |      |   |   |
|------|------|-----|-----------|--------|--------|--------|------|------|---|---|
| ATOM | 7619 | O   | VAL A 475 | 11.828 | 42.326 | -0.735 | 1.00 | 0.00 | B | O |
| ATOM | 7620 | N   | THR A 476 | 14.044 | 42.014 | -0.513 | 1.00 | 0.00 | B | N |
| ATOM | 7621 | CA  | THR A 476 | 14.273 | 42.386 | -1.877 | 1.00 | 0.00 | B | C |
| ATOM | 7622 | CB  | THR A 476 | 15.729 | 42.404 | -2.248 | 1.00 | 0.00 | B | C |
| ATOM | 7623 | OG1 | THR A 476 | 16.285 | 41.103 | -2.146 | 1.00 | 0.00 | B | O |
| ATOM | 7624 | CG2 | THR A 476 | 16.462 | 43.369 | -1.300 | 1.00 | 0.00 | B | C |
| ATOM | 7625 | C   | THR A 476 | 13.583 | 41.387 | -2.752 | 1.00 | 0.00 | B | C |
| ATOM | 7626 | O   | THR A 476 | 12.972 | 41.744 | -3.758 | 1.00 | 0.00 | B | O |
| ATOM | 7627 | N   | GLY A 477 | 13.655 | 40.099 | -2.373 | 1.00 | 0.00 | B | N |
| ATOM | 7628 | CA  | GLY A 477 | 13.080 | 39.059 | -3.177 | 1.00 | 0.00 | B | C |
| ATOM | 7629 | C   | GLY A 477 | 11.597 | 39.232 | -3.280 | 1.00 | 0.00 | B | C |
| ATOM | 7630 | O   | GLY A 477 | 11.019 | 39.016 | -4.344 | 1.00 | 0.00 | B | O |
| ATOM | 7631 | N   | GLU A 478 | 10.931 | 39.606 | -2.171 | 1.00 | 0.00 | B | N |
| ATOM | 7632 | CA  | GLU A 478 | 9.502  | 39.719 | -2.186 | 1.00 | 0.00 | B | C |
| ATOM | 7633 | CB  | GLU A 478 | 8.902  | 40.067 | -0.810 | 1.00 | 0.00 | B | C |
| ATOM | 7634 | CG  | GLU A 478 | 9.254  | 41.472 | -0.321 | 1.00 | 0.00 | B | C |
| ATOM | 7635 | CD  | GLU A 478 | 8.648  | 41.675 | 1.059  | 1.00 | 0.00 | B | C |
| ATOM | 7636 | OE1 | GLU A 478 | 8.319  | 40.654 | 1.719  | 1.00 | 0.00 | B | O |
| ATOM | 7637 | OE2 | GLU A 478 | 8.512  | 42.857 | 1.474  | 1.00 | 0.00 | B | O |
| ATOM | 7638 | C   | GLU A 478 | 9.102  | 40.804 | -3.133 | 1.00 | 0.00 | B | C |
| ATOM | 7639 | O   | GLU A 478 | 8.156  | 40.643 | -3.906 | 1.00 | 0.00 | B | O |
| ATOM | 7640 | N   | ILE A 479 | 9.810  | 41.945 | -3.098 | 1.00 | 0.00 | B | N |
| ATOM | 7641 | CA  | ILE A 479 | 9.475  | 43.033 | -3.969 | 1.00 | 0.00 | B | C |
| ATOM | 7642 | CB  | ILE A 479 | 10.278 | 44.277 | -3.719 | 1.00 | 0.00 | B | C |
| ATOM | 7643 | CG2 | ILE A 479 | 9.978  | 45.269 | -4.857 | 1.00 | 0.00 | B | C |
| ATOM | 7644 | CG1 | ILE A 479 | 9.981  | 44.839 | -2.318 | 1.00 | 0.00 | B | C |
| ATOM | 7645 | CD  | ILE A 479 | 10.923 | 45.965 | -1.898 | 1.00 | 0.00 | B | C |
| ATOM | 7646 | C   | ILE A 479 | 9.715  | 42.611 | -5.383 | 1.00 | 0.00 | B | C |
| ATOM | 7647 | O   | ILE A 479 | 8.905  | 42.883 | -6.268 | 1.00 | 0.00 | B | O |
| ATOM | 7648 | N   | LEU A 480 | 10.841 | 41.916 | -5.626 | 1.00 | 0.00 | B | N |
| ATOM | 7649 | CA  | LEU A 480 | 11.222 | 41.527 | -6.952 | 1.00 | 0.00 | B | C |
| ATOM | 7650 | CB  | LEU A 480 | 12.585 | 40.818 | -6.988 | 1.00 | 0.00 | B | C |
| ATOM | 7651 | CG  | LEU A 480 | 13.738 | 41.709 | -6.487 | 1.00 | 0.00 | B | C |
| ATOM | 7652 | CD1 | LEU A 480 | 15.098 | 41.013 | -6.646 | 1.00 | 0.00 | B | C |
| ATOM | 7653 | CD2 | LEU A 480 | 13.686 | 43.100 | -7.140 | 1.00 | 0.00 | B | C |
| ATOM | 7654 | C   | LEU A 480 | 10.204 | 40.588 | -7.526 | 1.00 | 0.00 | B | C |
| ATOM | 7655 | O   | LEU A 480 | 9.845  | 40.699 | -8.696 | 1.00 | 0.00 | B | O |
| ATOM | 7656 | N   | SER A 481 | 9.705  | 39.638 | -6.716 | 1.00 | 0.00 | B | N |

|      |      |     |           |        |        |         |      |      |   |   |
|------|------|-----|-----------|--------|--------|---------|------|------|---|---|
| ATOM | 7657 | CA  | SER A 481 | 8.774  | 38.671 | -7.223  | 1.00 | 0.00 | B | C |
| ATOM | 7658 | CB  | SER A 481 | 8.375  | 37.619 | -6.173  | 1.00 | 0.00 | B | C |
| ATOM | 7659 | OG  | SER A 481 | 7.678  | 38.233 | -5.101  | 1.00 | 0.00 | B | O |
| ATOM | 7660 | C   | SER A 481 | 7.519  | 39.360 | -7.671  | 1.00 | 0.00 | B | C |
| ATOM | 7661 | O   | SER A 481 | 6.966  | 39.038 | -8.721  | 1.00 | 0.00 | B | O |
| ATOM | 7662 | N   | VAL A 482 | 7.031  | 40.334 | -6.884  | 1.00 | 0.00 | B | N |
| ATOM | 7663 | CA  | VAL A 482 | 5.817  | 41.010 | -7.235  | 1.00 | 0.00 | B | C |
| ATOM | 7664 | CB  | VAL A 482 | 5.399  | 42.026 | -6.215  | 1.00 | 0.00 | B | C |
| ATOM | 7665 | CG1 | VAL A 482 | 4.097  | 42.694 | -6.689  | 1.00 | 0.00 | B | C |
| ATOM | 7666 | CG2 | VAL A 482 | 5.300  | 41.333 | -4.844  | 1.00 | 0.00 | B | C |
| ATOM | 7667 | C   | VAL A 482 | 6.037  | 41.740 | -8.521  | 1.00 | 0.00 | B | C |
| ATOM | 7668 | O   | VAL A 482 | 5.192  | 41.723 | -9.416  | 1.00 | 0.00 | B | O |
| ATOM | 7669 | N   | LEU A 483 | 7.212  | 42.390 | -8.648  | 1.00 | 0.00 | B | N |
| ATOM | 7670 | CA  | LEU A 483 | 7.540  | 43.174 | -9.804  | 1.00 | 0.00 | B | C |
| ATOM | 7671 | CB  | LEU A 483 | 8.939  | 43.815 | -9.681  | 1.00 | 0.00 | B | C |
| ATOM | 7672 | CG  | LEU A 483 | 9.333  | 44.850 | -10.766 | 1.00 | 0.00 | B | C |
| ATOM | 7673 | CD1 | LEU A 483 | 10.746 | 45.391 | -10.503 | 1.00 | 0.00 | B | C |
| ATOM | 7674 | CD2 | LEU A 483 | 9.203  | 44.315 | -12.201 | 1.00 | 0.00 | B | C |
| ATOM | 7675 | C   | LEU A 483 | 7.539  | 42.237 | -10.965 | 1.00 | 0.00 | B | C |
| ATOM | 7676 | O   | LEU A 483 | 7.075  | 42.576 | -12.052 | 1.00 | 0.00 | B | O |
| ATOM | 7677 | N   | GLY A 484 | 8.070  | 41.020 | -10.760 | 1.00 | 0.00 | B | N |
| ATOM | 7678 | CA  | GLY A 484 | 8.118  | 40.062 | -11.818 | 1.00 | 0.00 | B | C |
| ATOM | 7679 | C   | GLY A 484 | 6.712  | 39.754 | -12.218 | 1.00 | 0.00 | B | C |
| ATOM | 7680 | O   | GLY A 484 | 6.419  | 39.522 | -13.390 | 1.00 | 0.00 | B | O |
| ATOM | 7681 | N   | GLY A 485 | 5.805  | 39.723 | -11.228 | 1.00 | 0.00 | B | N |
| ATOM | 7682 | CA  | GLY A 485 | 4.431  | 39.385 | -11.463 | 1.00 | 0.00 | B | C |
| ATOM | 7683 | C   | GLY A 485 | 3.769  | 40.382 | -12.368 | 1.00 | 0.00 | B | C |
| ATOM | 7684 | O   | GLY A 485 | 2.964  | 40.006 | -13.217 | 1.00 | 0.00 | B | O |
| ATOM | 7685 | N   | VAL A 486 | 4.077  | 41.683 | -12.207 | 1.00 | 0.00 | B | N |
| ATOM | 7686 | CA  | VAL A 486 | 3.395  | 42.707 | -12.954 | 1.00 | 0.00 | B | C |
| ATOM | 7687 | CB  | VAL A 486 | 3.795  | 44.095 | -12.554 | 1.00 | 0.00 | B | C |
| ATOM | 7688 | CG1 | VAL A 486 | 5.231  | 44.356 | -13.035 | 1.00 | 0.00 | B | C |
| ATOM | 7689 | CG2 | VAL A 486 | 2.759  | 45.082 | -13.116 | 1.00 | 0.00 | B | C |
| ATOM | 7690 | C   | VAL A 486 | 3.656  | 42.567 | -14.423 | 1.00 | 0.00 | B | C |
| ATOM | 7691 | O   | VAL A 486 | 2.769  | 42.800 | -15.243 | 1.00 | 0.00 | B | O |
| ATOM | 7692 | N   | TYR A 487 | 4.883  | 42.171 | -14.803 | 1.00 | 0.00 | B | N |
| ATOM | 7693 | CA  | TYR A 487 | 5.221  | 42.138 | -16.197 | 1.00 | 0.00 | B | C |
| ATOM | 7694 | CB  | TYR A 487 | 6.673  | 41.716 | -16.458 | 1.00 | 0.00 | B | C |

|      |      |               |        |        |         |      |      |   |   |
|------|------|---------------|--------|--------|---------|------|------|---|---|
| ATOM | 7695 | CG TYR A 487  | 6.850  | 41.802 | -17.931 | 1.00 | 0.00 | B | C |
| ATOM | 7696 | CD1 TYR A 487 | 7.084  | 43.025 | -18.512 | 1.00 | 0.00 | B | C |
| ATOM | 7697 | CE1 TYR A 487 | 7.242  | 43.137 | -19.870 | 1.00 | 0.00 | B | C |
| ATOM | 7698 | CZ TYR A 487  | 7.160  | 42.021 | -20.661 | 1.00 | 0.00 | B | C |
| ATOM | 7699 | OH TYR A 487  | 7.325  | 42.136 | -22.058 | 1.00 | 0.00 | B | O |
| ATOM | 7700 | CD2 TYR A 487 | 6.753  | 40.686 | -18.730 | 1.00 | 0.00 | B | C |
| ATOM | 7701 | CE2 TYR A 487 | 6.914  | 40.794 | -20.092 | 1.00 | 0.00 | B | C |
| ATOM | 7702 | C TYR A 487   | 4.322  | 41.180 | -16.913 | 1.00 | 0.00 | B | C |
| ATOM | 7703 | O TYR A 487   | 3.854  | 41.463 | -18.014 | 1.00 | 0.00 | B | O |
| ATOM | 7704 | N PHE A 488   | 4.054  | 40.017 | -16.297 | 1.00 | 0.00 | B | N |
| ATOM | 7705 | CA PHE A 488  | 3.224  | 39.019 | -16.905 | 1.00 | 0.00 | B | C |
| ATOM | 7706 | CB PHE A 488  | 3.052  | 37.769 | -16.016 | 1.00 | 0.00 | B | C |
| ATOM | 7707 | CG PHE A 488  | 4.352  | 37.042 | -15.890 | 1.00 | 0.00 | B | C |
| ATOM | 7708 | CD1 PHE A 488 | 4.779  | 36.199 | -16.891 | 1.00 | 0.00 | B | C |
| ATOM | 7709 | CE1 PHE A 488 | 5.971  | 35.519 | -16.778 | 1.00 | 0.00 | B | C |
| ATOM | 7710 | CZ PHE A 488  | 6.748  | 35.669 | -15.655 | 1.00 | 0.00 | B | C |
| ATOM | 7711 | CD2 PHE A 488 | 5.135  | 37.176 | -14.763 | 1.00 | 0.00 | B | C |
| ATOM | 7712 | CE2 PHE A 488 | 6.327  | 36.497 | -14.644 | 1.00 | 0.00 | B | C |
| ATOM | 7713 | C PHE A 488   | 1.855  | 39.593 | -17.118 | 1.00 | 0.00 | B | C |
| ATOM | 7714 | O PHE A 488   | 1.247  | 39.388 | -18.169 | 1.00 | 0.00 | B | O |
| ATOM | 7715 | N PHE A 489   | 1.321  | 40.325 | -16.118 | 1.00 | 0.00 | B | N |
| ATOM | 7716 | CA PHE A 489  | -0.005 | 40.859 | -16.240 | 1.00 | 0.00 | B | C |
| ATOM | 7717 | CB PHE A 489  | -0.502 | 41.589 | -14.979 | 1.00 | 0.00 | B | C |
| ATOM | 7718 | CG PHE A 489  | -1.890 | 42.049 | -15.276 | 1.00 | 0.00 | B | C |
| ATOM | 7719 | CD1 PHE A 489 | -2.964 | 41.230 | -15.010 | 1.00 | 0.00 | B | C |
| ATOM | 7720 | CE1 PHE A 489 | -4.249 | 41.641 | -15.282 | 1.00 | 0.00 | B | C |
| ATOM | 7721 | CZ PHE A 489  | -4.470 | 42.882 | -15.830 | 1.00 | 0.00 | B | C |
| ATOM | 7722 | CD2 PHE A 489 | -2.122 | 43.288 | -15.830 | 1.00 | 0.00 | B | C |
| ATOM | 7723 | CE2 PHE A 489 | -3.405 | 43.703 | -16.104 | 1.00 | 0.00 | B | C |
| ATOM | 7724 | C PHE A 489   | -0.041 | 41.845 | -17.365 | 1.00 | 0.00 | B | C |
| ATOM | 7725 | O PHE A 489   | -0.976 | 41.851 | -18.164 | 1.00 | 0.00 | B | O |
| ATOM | 7726 | N PHE A 490   | 0.979  | 42.721 | -17.455 | 1.00 | 0.00 | B | N |
| ATOM | 7727 | CA PHE A 490  | 1.004  | 43.726 | -18.481 | 1.00 | 0.00 | B | C |
| ATOM | 7728 | CB PHE A 490  | 2.190  | 44.699 | -18.332 | 1.00 | 0.00 | B | C |
| ATOM | 7729 | CG PHE A 490  | 2.179  | 45.668 | -19.466 | 1.00 | 0.00 | B | C |
| ATOM | 7730 | CD1 PHE A 490 | 1.236  | 46.668 | -19.541 | 1.00 | 0.00 | B | C |
| ATOM | 7731 | CE1 PHE A 490 | 1.243  | 47.558 | -20.589 | 1.00 | 0.00 | B | C |
| ATOM | 7732 | CZ PHE A 490  | 2.200  | 47.463 | -21.571 | 1.00 | 0.00 | B | C |



|      |      |               |        |        |         |      |      |   |   |
|------|------|---------------|--------|--------|---------|------|------|---|---|
| ATOM | 7733 | CD2 PHE A 490 | 3.138  | 45.586 | -20.449 | 1.00 | 0.00 | B | C |
| ATOM | 7734 | CE2 PHE A 490 | 3.151  | 46.475 | -21.499 | 1.00 | 0.00 | B | C |
| ATOM | 7735 | C PHE A 490   | 1.091  | 43.075 | -19.827 | 1.00 | 0.00 | B | C |
| ATOM | 7736 | O PHE A 490   | 0.378  | 43.459 | -20.752 | 1.00 | 0.00 | B | O |
| ATOM | 7737 | N ARG A 491   | 1.969  | 42.068 | -19.978 | 1.00 | 0.00 | B | N |
| ATOM | 7738 | CA ARG A 491  | 2.136  | 41.432 | -21.255 | 1.00 | 0.00 | B | C |
| ATOM | 7739 | CB ARG A 491  | 3.298  | 40.418 | -21.273 | 1.00 | 0.00 | B | C |
| ATOM | 7740 | CG ARG A 491  | 3.165  | 39.291 | -20.249 | 1.00 | 0.00 | B | C |
| ATOM | 7741 | CD ARG A 491  | 4.433  | 38.442 | -20.111 | 1.00 | 0.00 | B | C |
| ATOM | 7742 | NE ARG A 491  | 4.509  | 37.535 | -21.290 | 1.00 | 0.00 | B | N |
| ATOM | 7743 | CZ ARG A 491  | 4.139  | 36.227 | -21.163 | 1.00 | 0.00 | B | C |
| ATOM | 7744 | NH1 ARG A 491 | 3.767  | 35.741 | -19.942 | 1.00 | 0.00 | B | N |
| ATOM | 7745 | NH2 ARG A 491 | 4.152  | 35.403 | -22.251 | 1.00 | 0.00 | B | N |
| ATOM | 7746 | C ARG A 491   | 0.873  | 40.727 | -21.650 | 1.00 | 0.00 | B | C |
| ATOM | 7747 | O ARG A 491   | 0.481  | 40.754 | -22.815 | 1.00 | 0.00 | B | O |
| ATOM | 7748 | N GLY A 492   | 0.198  | 40.074 | -20.684 | 1.00 | 0.00 | B | N |
| ATOM | 7749 | CA GLY A 492  | -0.987 | 39.308 | -20.960 | 1.00 | 0.00 | B | C |
| ATOM | 7750 | C GLY A 492   | -2.102 | 40.177 | -21.461 | 1.00 | 0.00 | B | C |
| ATOM | 7751 | O GLY A 492   | -2.845 | 39.787 | -22.362 | 1.00 | 0.00 | B | O |
| ATOM | 7752 | N ILE A 493   | -2.251 | 41.384 | -20.886 | 1.00 | 0.00 | B | N |
| ATOM | 7753 | CA ILE A 493  | -3.351 | 42.233 | -21.242 | 1.00 | 0.00 | B | C |
| ATOM | 7754 | CB ILE A 493  | -3.399 | 43.513 | -20.453 | 1.00 | 0.00 | B | C |
| ATOM | 7755 | CG2 ILE A 493 | -2.201 | 44.391 | -20.850 | 1.00 | 0.00 | B | C |
| ATOM | 7756 | CG1 ILE A 493 | -4.764 | 44.197 | -20.637 | 1.00 | 0.00 | B | C |
| ATOM | 7757 | CD ILE A 493  | -5.022 | 45.314 | -19.628 | 1.00 | 0.00 | B | C |
| ATOM | 7758 | C ILE A 493   | -3.253 | 42.564 | -22.691 | 1.00 | 0.00 | B | C |
| ATOM | 7759 | O ILE A 493   | -4.265 | 42.604 | -23.388 | 1.00 | 0.00 | B | O |
| ATOM | 7760 | N GLN A 494   | -2.030 | 42.809 | -23.183 | 1.00 | 0.00 | B | N |
| ATOM | 7761 | CA GLN A 494  | -1.821 | 43.149 | -24.560 | 1.00 | 0.00 | B | C |
| ATOM | 7762 | CB GLN A 494  | -0.341 | 43.381 | -24.896 | 1.00 | 0.00 | B | C |
| ATOM | 7763 | CG GLN A 494  | -0.102 | 43.745 | -26.363 | 1.00 | 0.00 | B | C |
| ATOM | 7764 | CD GLN A 494  | 1.400  | 43.769 | -26.595 | 1.00 | 0.00 | B | C |
| ATOM | 7765 | OE1 GLN A 494 | 1.912  | 44.555 | -27.390 | 1.00 | 0.00 | B | O |
| ATOM | 7766 | NE2 GLN A 494 | 2.131  | 42.870 | -25.881 | 1.00 | 0.00 | B | N |
| ATOM | 7767 | C GLN A 494   | -2.256 | 42.002 | -25.406 | 1.00 | 0.00 | B | C |
| ATOM | 7768 | O GLN A 494   | -2.805 | 42.199 | -26.483 | 1.00 | 0.00 | B | O |
| ATOM | 7769 | N TYR A 495   | -2.006 | 40.762 | -24.965 | 1.00 | 0.00 | B | N |
| ATOM | 7770 | CA TYR A 495  | -2.367 | 39.641 | -25.783 | 1.00 | 0.00 | B | C |

|      |      |     |     |   |     |         |        |         |      |      |   |   |
|------|------|-----|-----|---|-----|---------|--------|---------|------|------|---|---|
| ATOM | 7771 | CB  | TYR | A | 495 | -1.917  | 38.306 | -25.169 | 1.00 | 0.00 | B | C |
| ATOM | 7772 | CG  | TYR | A | 495 | -2.062  | 37.240 | -26.199 | 1.00 | 0.00 | B | C |
| ATOM | 7773 | CD1 | TYR | A | 495 | -3.244  | 36.556 | -26.362 | 1.00 | 0.00 | B | C |
| ATOM | 7774 | CE1 | TYR | A | 495 | -3.350  | 35.575 | -27.319 | 1.00 | 0.00 | B | C |
| ATOM | 7775 | CZ  | TYR | A | 495 | -2.277  | 35.270 | -28.122 | 1.00 | 0.00 | B | C |
| ATOM | 7776 | OH  | TYR | A | 495 | -2.386  | 34.260 | -29.101 | 1.00 | 0.00 | B | O |
| ATOM | 7777 | CD2 | TYR | A | 495 | -0.996  | 36.933 | -27.011 | 1.00 | 0.00 | B | C |
| ATOM | 7778 | CE2 | TYR | A | 495 | -1.095  | 35.952 | -27.969 | 1.00 | 0.00 | B | C |
| ATOM | 7779 | C   | TYR | A | 495 | -3.856  | 39.633 | -25.921 | 1.00 | 0.00 | B | C |
| ATOM | 7780 | O   | TYR | A | 495 | -4.393  | 39.403 | -27.003 | 1.00 | 0.00 | B | O |
| ATOM | 7781 | N   | PHE | A | 496 | -4.564  | 39.875 | -24.804 | 1.00 | 0.00 | B | N |
| ATOM | 7782 | CA  | PHE | A | 496 | -5.995  | 39.905 | -24.804 | 1.00 | 0.00 | B | C |
| ATOM | 7783 | CB  | PHE | A | 496 | -6.550  | 40.094 | -23.378 | 1.00 | 0.00 | B | C |
| ATOM | 7784 | CG  | PHE | A | 496 | -8.037  | 39.978 | -23.377 | 1.00 | 0.00 | B | C |
| ATOM | 7785 | CD1 | PHE | A | 496 | -8.637  | 38.746 | -23.478 | 1.00 | 0.00 | B | C |
| ATOM | 7786 | CE1 | PHE | A | 496 | -10.006 | 38.625 | -23.467 | 1.00 | 0.00 | B | C |
| ATOM | 7787 | CZ  | PHE | A | 496 | -10.793 | 39.746 | -23.347 | 1.00 | 0.00 | B | C |
| ATOM | 7788 | CD2 | PHE | A | 496 | -8.832  | 41.094 | -23.246 | 1.00 | 0.00 | B | C |
| ATOM | 7789 | CE2 | PHE | A | 496 | -10.204 | 40.982 | -23.233 | 1.00 | 0.00 | B | C |
| ATOM | 7790 | C   | PHE | A | 496 | -6.451  | 41.061 | -25.639 | 1.00 | 0.00 | B | C |
| ATOM | 7791 | O   | PHE | A | 496 | -7.349  | 40.923 | -26.469 | 1.00 | 0.00 | B | O |
| ATOM | 7792 | N   | LEU | A | 497 | -5.825  | 42.238 | -25.440 | 1.00 | 0.00 | B | N |
| ATOM | 7793 | CA  | LEU | A | 497 | -6.232  | 43.448 | -26.094 | 1.00 | 0.00 | B | C |
| ATOM | 7794 | CB  | LEU | A | 497 | -5.544  | 44.697 | -25.505 | 1.00 | 0.00 | B | C |
| ATOM | 7795 | CG  | LEU | A | 497 | -6.128  | 46.058 | -25.955 | 1.00 | 0.00 | B | C |
| ATOM | 7796 | CD1 | LEU | A | 497 | -5.496  | 47.199 | -25.146 | 1.00 | 0.00 | B | C |
| ATOM | 7797 | CD2 | LEU | A | 497 | -5.999  | 46.309 | -27.466 | 1.00 | 0.00 | B | C |
| ATOM | 7798 | C   | LEU | A | 497 | -5.974  | 43.380 | -27.568 | 1.00 | 0.00 | B | C |
| ATOM | 7799 | O   | LEU | A | 497 | -6.807  | 43.799 | -28.369 | 1.00 | 0.00 | B | O |
| ATOM | 7800 | N   | GLN | A | 498 | -4.815  | 42.850 | -27.975 | 1.00 | 0.00 | B | N |
| ATOM | 7801 | CA  | GLN | A | 498 | -4.434  | 42.811 | -29.353 | 1.00 | 0.00 | B | C |
| ATOM | 7802 | CB  | GLN | A | 498 | -3.070  | 42.131 | -29.513 | 1.00 | 0.00 | B | C |
| ATOM | 7803 | CG  | GLN | A | 498 | -2.546  | 42.040 | -30.940 | 1.00 | 0.00 | B | C |
| ATOM | 7804 | CD  | GLN | A | 498 | -1.204  | 41.340 | -30.822 | 1.00 | 0.00 | B | C |
| ATOM | 7805 | OE1 | GLN | A | 498 | -1.100  | 40.291 | -30.188 | 1.00 | 0.00 | B | O |
| ATOM | 7806 | NE2 | GLN | A | 498 | -0.144  | 41.945 | -31.420 | 1.00 | 0.00 | B | N |
| ATOM | 7807 | C   | GLN | A | 498 | -5.450  | 41.998 | -30.079 | 1.00 | 0.00 | B | C |
| ATOM | 7808 | O   | GLN | A | 498 | -5.938  | 42.405 | -31.133 | 1.00 | 0.00 | B | O |

|      |      |     |           |         |        |         |      |      |   |   |
|------|------|-----|-----------|---------|--------|---------|------|------|---|---|
| ATOM | 7809 | N   | ARG A 499 | -5.805  | 40.826 | -29.525 | 1.00 | 0.00 | B | N |
| ATOM | 7810 | CA  | ARG A 499 | -6.814  | 40.044 | -30.169 | 1.00 | 0.00 | B | C |
| ATOM | 7811 | CB  | ARG A 499 | -6.341  | 38.653 | -30.617 | 1.00 | 0.00 | B | C |
| ATOM | 7812 | CG  | ARG A 499 | -5.380  | 38.725 | -31.802 | 1.00 | 0.00 | B | C |
| ATOM | 7813 | CD  | ARG A 499 | -6.059  | 39.257 | -33.064 | 1.00 | 0.00 | B | C |
| ATOM | 7814 | NE  | ARG A 499 | -5.048  | 39.260 | -34.156 | 1.00 | 0.00 | B | N |
| ATOM | 7815 | CZ  | ARG A 499 | -5.403  | 38.821 | -35.395 | 1.00 | 0.00 | B | C |
| ATOM | 7816 | NH1 | ARG A 499 | -6.681  | 38.404 | -35.630 | 1.00 | 0.00 | B | N |
| ATOM | 7817 | NH2 | ARG A 499 | -4.474  | 38.771 | -36.396 | 1.00 | 0.00 | B | N |
| ATOM | 7818 | C   | ARG A 499 | -7.926  | 39.856 | -29.198 | 1.00 | 0.00 | B | C |
| ATOM | 7819 | O   | ARG A 499 | -7.866  | 39.020 | -28.296 | 1.00 | 0.00 | B | O |
| ATOM | 7820 | N   | ARG A 500 | -8.989  | 40.642 | -29.406 | 1.00 | 0.00 | B | N |
| ATOM | 7821 | CA  | ARG A 500 | -10.180 | 40.667 | -28.615 | 1.00 | 0.00 | B | C |
| ATOM | 7822 | CB  | ARG A 500 | -11.157 | 41.734 | -29.129 | 1.00 | 0.00 | B | C |
| ATOM | 7823 | CG  | ARG A 500 | -10.563 | 43.140 | -29.119 | 1.00 | 0.00 | B | C |
| ATOM | 7824 | CD  | ARG A 500 | -11.323 | 44.123 | -30.009 | 1.00 | 0.00 | B | C |
| ATOM | 7825 | NE  | ARG A 500 | -11.118 | 43.697 | -31.423 | 1.00 | 0.00 | B | N |
| ATOM | 7826 | CZ  | ARG A 500 | -11.969 | 44.130 | -32.398 | 1.00 | 0.00 | B | C |
| ATOM | 7827 | NH1 | ARG A 500 | -13.035 | 44.917 | -32.070 | 1.00 | 0.00 | B | N |
| ATOM | 7828 | NH2 | ARG A 500 | -11.755 | 43.777 | -33.699 | 1.00 | 0.00 | B | N |
| ATOM | 7829 | C   | ARG A 500 | -10.889 | 39.351 | -28.725 | 1.00 | 0.00 | B | C |
| ATOM | 7830 | O   | ARG A 500 | -11.410 | 38.856 | -27.724 | 1.00 | 0.00 | B | O |
| ATOM | 7831 | N   | PRO A 501 | -10.930 | 38.743 | -29.885 | 1.00 | 0.00 | B | N |
| ATOM | 7832 | CD  | PRO A 501 | -10.985 | 39.474 | -31.142 | 1.00 | 0.00 | B | C |
| ATOM | 7833 | CA  | PRO A 501 | -11.665 | 37.516 | -29.999 | 1.00 | 0.00 | B | C |
| ATOM | 7834 | CB  | PRO A 501 | -11.735 | 37.194 | -31.496 | 1.00 | 0.00 | B | C |
| ATOM | 7835 | CG  | PRO A 501 | -10.981 | 38.350 | -32.188 | 1.00 | 0.00 | B | C |
| ATOM | 7836 | C   | PRO A 501 | -11.116 | 36.438 | -29.128 | 1.00 | 0.00 | B | C |
| ATOM | 7837 | O   | PRO A 501 | -9.906  | 36.371 | -28.921 | 1.00 | 0.00 | B | O |
| ATOM | 7838 | N   | SER A 502 | -12.010 | 35.575 | -28.616 | 1.00 | 0.00 | B | N |
| ATOM | 7839 | CA  | SER A 502 | -11.673 | 34.569 | -27.658 | 1.00 | 0.00 | B | C |
| ATOM | 7840 | CB  | SER A 502 | -12.916 | 34.094 | -26.875 | 1.00 | 0.00 | B | C |
| ATOM | 7841 | OG  | SER A 502 | -12.576 | 33.208 | -25.820 | 1.00 | 0.00 | B | O |
| ATOM | 7842 | C   | SER A 502 | -11.061 | 33.401 | -28.347 | 1.00 | 0.00 | B | C |
| ATOM | 7843 | O   | SER A 502 | -10.770 | 33.437 | -29.539 | 1.00 | 0.00 | B | O |
| ATOM | 7844 | N   | MET A 503 | -10.764 | 32.360 | -27.554 | 1.00 | 0.00 | B | N |
| ATOM | 7845 | CA  | MET A 503 | -10.295 | 31.112 | -28.054 | 1.00 | 0.00 | B | C |
| ATOM | 7846 | CB  | MET A 503 | -8.918  | 30.729 | -27.488 | 1.00 | 0.00 | B | C |

|      |      |     |           |         |        |         |      |      |   |   |
|------|------|-----|-----------|---------|--------|---------|------|------|---|---|
| ATOM | 7847 | CG  | MET A 503 | -8.833  | 30.819 | -25.964 | 1.00 | 0.00 | B | C |
| ATOM | 7848 | SD  | MET A 503 | -7.136  | 30.966 | -25.330 | 1.00 | 0.00 | B | S |
| ATOM | 7849 | CE  | MET A 503 | -6.884  | 32.628 | -26.020 | 1.00 | 0.00 | B | C |
| ATOM | 7850 | C   | MET A 503 | -11.337 | 30.137 | -27.618 | 1.00 | 0.00 | B | C |
| ATOM | 7851 | O   | MET A 503 | -11.817 | 30.196 | -26.486 | 1.00 | 0.00 | B | O |
| ATOM | 7852 | N   | LYS A 504 | -11.729 | 29.227 | -28.525 | 1.00 | 0.00 | B | N |
| ATOM | 7853 | CA  | LYS A 504 | -12.798 | 28.320 | -28.245 | 1.00 | 0.00 | B | C |
| ATOM | 7854 | CB  | LYS A 504 | -13.329 | 27.569 | -29.480 | 1.00 | 0.00 | B | C |
| ATOM | 7855 | CG  | LYS A 504 | -14.660 | 26.860 | -29.222 | 1.00 | 0.00 | B | C |
| ATOM | 7856 | CD  | LYS A 504 | -15.401 | 26.451 | -30.496 | 1.00 | 0.00 | B | C |
| ATOM | 7857 | CE  | LYS A 504 | -16.817 | 25.931 | -30.238 | 1.00 | 0.00 | B | C |
| ATOM | 7858 | NZ  | LYS A 504 | -16.761 | 24.616 | -29.559 | 1.00 | 0.00 | B | N |
| ATOM | 7859 | C   | LYS A 504 | -12.336 | 27.323 | -27.245 | 1.00 | 0.00 | B | C |
| ATOM | 7860 | O   | LYS A 504 | -11.141 | 27.176 | -26.985 | 1.00 | 0.00 | B | O |
| ATOM | 7861 | N   | THR A 505 | -13.307 | 26.636 | -26.624 | 1.00 | 0.00 | B | N |
| ATOM | 7862 | CA  | THR A 505 | -13.018 | 25.665 | -25.620 | 1.00 | 0.00 | B | C |
| ATOM | 7863 | CB  | THR A 505 | -14.254 | 25.050 | -25.040 | 1.00 | 0.00 | B | C |
| ATOM | 7864 | OG1 | THR A 505 | -14.951 | 24.322 | -26.040 | 1.00 | 0.00 | B | O |
| ATOM | 7865 | CG2 | THR A 505 | -15.142 | 26.177 | -24.488 | 1.00 | 0.00 | B | C |
| ATOM | 7866 | C   | THR A 505 | -12.240 | 24.561 | -26.245 | 1.00 | 0.00 | B | C |
| ATOM | 7867 | O   | THR A 505 | -11.295 | 24.050 | -25.649 | 1.00 | 0.00 | B | O |
| ATOM | 7868 | N   | LEU A 506 | -12.604 | 24.173 | -27.482 | 1.00 | 0.00 | B | N |
| ATOM | 7869 | CA  | LEU A 506 | -11.928 | 23.062 | -28.079 | 1.00 | 0.00 | B | C |
| ATOM | 7870 | CB  | LEU A 506 | -12.405 | 22.730 | -29.504 | 1.00 | 0.00 | B | C |
| ATOM | 7871 | CG  | LEU A 506 | -13.826 | 22.148 | -29.581 | 1.00 | 0.00 | B | C |
| ATOM | 7872 | CD1 | LEU A 506 | -14.200 | 21.800 | -31.032 | 1.00 | 0.00 | B | C |
| ATOM | 7873 | CD2 | LEU A 506 | -13.991 | 20.957 | -28.628 | 1.00 | 0.00 | B | C |
| ATOM | 7874 | C   | LEU A 506 | -10.480 | 23.387 | -28.183 | 1.00 | 0.00 | B | C |
| ATOM | 7875 | O   | LEU A 506 | -9.633  | 22.570 | -27.827 | 1.00 | 0.00 | B | O |
| ATOM | 7876 | N   | PHE A 507 | -10.142 | 24.598 | -28.657 | 1.00 | 0.00 | B | N |
| ATOM | 7877 | CA  | PHE A 507 | -8.742  | 24.862 | -28.758 | 1.00 | 0.00 | B | C |
| ATOM | 7878 | CB  | PHE A 507 | -8.304  | 25.470 | -30.103 | 1.00 | 0.00 | B | C |
| ATOM | 7879 | CG  | PHE A 507 | -8.985  | 26.773 | -30.374 | 1.00 | 0.00 | B | C |
| ATOM | 7880 | CD1 | PHE A 507 | -10.265 | 26.798 | -30.880 | 1.00 | 0.00 | B | C |
| ATOM | 7881 | CE1 | PHE A 507 | -10.890 | 27.995 | -31.148 | 1.00 | 0.00 | B | C |
| ATOM | 7882 | CZ  | PHE A 507 | -10.232 | 29.179 | -30.915 | 1.00 | 0.00 | B | C |
| ATOM | 7883 | CD2 | PHE A 507 | -8.333  | 27.967 | -30.153 | 1.00 | 0.00 | B | C |
| ATOM | 7884 | CE2 | PHE A 507 | -8.950  | 29.165 | -30.418 | 1.00 | 0.00 | B | C |

|      |      |     |           |        |        |         |      |      |   |   |
|------|------|-----|-----------|--------|--------|---------|------|------|---|---|
| ATOM | 7885 | C   | PHE A 507 | -8.326 | 25.777 | -27.663 | 1.00 | 0.00 | B | C |
| ATOM | 7886 | O   | PHE A 507 | -8.692 | 26.950 | -27.626 | 1.00 | 0.00 | B | O |
| ATOM | 7887 | N   | VAL A 508 | -7.524 | 25.237 | -26.732 | 1.00 | 0.00 | B | N |
| ATOM | 7888 | CA  | VAL A 508 | -7.008 | 26.032 | -25.677 | 1.00 | 0.00 | B | C |
| ATOM | 7889 | CB  | VAL A 508 | -6.615 | 25.208 | -24.488 | 1.00 | 0.00 | B | C |
| ATOM | 7890 | CG1 | VAL A 508 | -6.058 | 26.140 | -23.405 | 1.00 | 0.00 | B | C |
| ATOM | 7891 | CG2 | VAL A 508 | -7.827 | 24.374 | -24.037 | 1.00 | 0.00 | B | C |
| ATOM | 7892 | C   | VAL A 508 | -5.765 | 26.608 | -26.256 | 1.00 | 0.00 | B | C |
| ATOM | 7893 | O   | VAL A 508 | -4.663 | 26.402 | -25.752 | 1.00 | 0.00 | B | O |
| ATOM | 7894 | N   | ASP A 509 | -5.936 | 27.372 | -27.346 | 1.00 | 0.00 | B | N |
| ATOM | 7895 | CA  | ASP A 509 | -4.814 | 27.953 | -28.007 | 1.00 | 0.00 | B | C |
| ATOM | 7896 | CB  | ASP A 509 | -4.750 | 27.598 | -29.503 | 1.00 | 0.00 | B | C |
| ATOM | 7897 | CG  | ASP A 509 | -3.475 | 28.176 | -30.102 | 1.00 | 0.00 | B | C |
| ATOM | 7898 | OD1 | ASP A 509 | -3.306 | 29.423 | -30.071 | 1.00 | 0.00 | B | O |
| ATOM | 7899 | OD2 | ASP A 509 | -2.648 | 27.367 | -30.600 | 1.00 | 0.00 | B | O |
| ATOM | 7900 | C   | ASP A 509 | -4.968 | 29.433 | -27.894 | 1.00 | 0.00 | B | C |
| ATOM | 7901 | O   | ASP A 509 | -6.024 | 29.976 | -28.216 | 1.00 | 0.00 | B | O |
| ATOM | 7902 | N   | SER A 510 | -3.904 | 30.123 | -27.439 | 1.00 | 0.00 | B | N |
| ATOM | 7903 | CA  | SER A 510 | -2.684 | 29.449 | -27.104 | 1.00 | 0.00 | B | C |
| ATOM | 7904 | CB  | SER A 510 | -1.434 | 30.346 | -27.218 | 1.00 | 0.00 | B | C |
| ATOM | 7905 | OG  | SER A 510 | -1.511 | 31.428 | -26.305 | 1.00 | 0.00 | B | O |
| ATOM | 7906 | C   | SER A 510 | -2.780 | 28.971 | -25.687 | 1.00 | 0.00 | B | C |
| ATOM | 7907 | O   | SER A 510 | -3.216 | 29.690 | -24.792 | 1.00 | 0.00 | B | O |
| ATOM | 7908 | N   | TYR A 511 | -2.375 | 27.705 | -25.474 | 1.00 | 0.00 | B | N |
| ATOM | 7909 | CA  | TYR A 511 | -2.416 | 27.038 | -24.205 | 1.00 | 0.00 | B | C |
| ATOM | 7910 | CB  | TYR A 511 | -1.941 | 25.579 | -24.363 | 1.00 | 0.00 | B | C |
| ATOM | 7911 | CG  | TYR A 511 | -1.698 | 24.926 | -23.040 | 1.00 | 0.00 | B | C |
| ATOM | 7912 | CD1 | TYR A 511 | -0.475 | 25.021 | -22.415 | 1.00 | 0.00 | B | C |
| ATOM | 7913 | CE1 | TYR A 511 | -0.243 | 24.417 | -21.201 | 1.00 | 0.00 | B | C |
| ATOM | 7914 | CZ  | TYR A 511 | -1.242 | 23.700 | -20.597 | 1.00 | 0.00 | B | C |
| ATOM | 7915 | OH  | TYR A 511 | -1.017 | 23.073 | -19.353 | 1.00 | 0.00 | B | O |
| ATOM | 7916 | CD2 | TYR A 511 | -2.686 | 24.200 | -22.424 | 1.00 | 0.00 | B | C |
| ATOM | 7917 | CE2 | TYR A 511 | -2.464 | 23.591 | -21.213 | 1.00 | 0.00 | B | C |
| ATOM | 7918 | C   | TYR A 511 | -1.483 | 27.671 | -23.215 | 1.00 | 0.00 | B | C |
| ATOM | 7919 | O   | TYR A 511 | -1.868 | 27.956 | -22.083 | 1.00 | 0.00 | B | O |
| ATOM | 7920 | N   | SER A 512 | -0.222 | 27.896 | -23.625 | 1.00 | 0.00 | B | N |
| ATOM | 7921 | CA  | SER A 512 | 0.816  | 28.333 | -22.733 | 1.00 | 0.00 | B | C |
| ATOM | 7922 | CB  | SER A 512 | 2.210  | 28.224 | -23.374 | 1.00 | 0.00 | B | C |

|      |      |     |     |   |     |        |        |         |      |      |   |   |
|------|------|-----|-----|---|-----|--------|--------|---------|------|------|---|---|
| ATOM | 7923 | OG  | SER | A | 512 | 2.278  | 29.042 | -24.534 | 1.00 | 0.00 | B | O |
| ATOM | 7924 | C   | SER | A | 512 | 0.640  | 29.739 | -22.260 | 1.00 | 0.00 | B | C |
| ATOM | 7925 | O   | SER | A | 512 | 0.770  | 30.023 | -21.070 | 1.00 | 0.00 | B | O |
| ATOM | 7926 | N   | GLU | A | 513 | 0.330  | 30.660 | -23.183 | 1.00 | 0.00 | B | N |
| ATOM | 7927 | CA  | GLU | A | 513 | 0.250  | 32.043 | -22.827 | 1.00 | 0.00 | B | C |
| ATOM | 7928 | CB  | GLU | A | 513 | 0.022  | 32.936 | -24.056 | 1.00 | 0.00 | B | C |
| ATOM | 7929 | CG  | GLU | A | 513 | 1.244  | 32.920 | -24.977 | 1.00 | 0.00 | B | C |
| ATOM | 7930 | CD  | GLU | A | 513 | 0.904  | 33.686 | -26.242 | 1.00 | 0.00 | B | C |
| ATOM | 7931 | OE1 | GLU | A | 513 | -0.295 | 33.696 | -26.626 | 1.00 | 0.00 | B | O |
| ATOM | 7932 | OE2 | GLU | A | 513 | 1.842  | 34.273 | -26.839 | 1.00 | 0.00 | B | O |
| ATOM | 7933 | C   | GLU | A | 513 | -0.855 | 32.222 | -21.837 | 1.00 | 0.00 | B | C |
| ATOM | 7934 | O   | GLU | A | 513 | -0.742 | 33.025 | -20.909 | 1.00 | 0.00 | B | O |
| ATOM | 7935 | N   | MET | A | 514 | -1.948 | 31.453 | -21.983 | 1.00 | 0.00 | B | N |
| ATOM | 7936 | CA  | MET | A | 514 | -3.059 | 31.607 | -21.087 | 1.00 | 0.00 | B | C |
| ATOM | 7937 | CB  | MET | A | 514 | -4.271 | 30.714 | -21.413 | 1.00 | 0.00 | B | C |
| ATOM | 7938 | CG  | MET | A | 514 | -4.069 | 29.238 | -21.070 | 1.00 | 0.00 | B | C |
| ATOM | 7939 | SD  | MET | A | 514 | -5.567 | 28.216 | -21.200 | 1.00 | 0.00 | B | S |
| ATOM | 7940 | CE  | MET | A | 514 | -6.139 | 28.498 | -19.501 | 1.00 | 0.00 | B | C |
| ATOM | 7941 | C   | MET | A | 514 | -2.627 | 31.273 | -19.695 | 1.00 | 0.00 | B | C |
| ATOM | 7942 | O   | MET | A | 514 | -3.070 | 31.910 | -18.743 | 1.00 | 0.00 | B | O |
| ATOM | 7943 | N   | LEU | A | 515 | -1.758 | 30.258 | -19.532 | 1.00 | 0.00 | B | N |
| ATOM | 7944 | CA  | LEU | A | 515 | -1.331 | 29.836 | -18.225 | 1.00 | 0.00 | B | C |
| ATOM | 7945 | CB  | LEU | A | 515 | -0.408 | 28.606 | -18.268 | 1.00 | 0.00 | B | C |
| ATOM | 7946 | CG  | LEU | A | 515 | -1.100 | 27.347 | -18.821 | 1.00 | 0.00 | B | C |
| ATOM | 7947 | CD1 | LEU | A | 515 | -0.155 | 26.136 | -18.807 | 1.00 | 0.00 | B | C |
| ATOM | 7948 | CD2 | LEU | A | 515 | -2.429 | 27.080 | -18.101 | 1.00 | 0.00 | B | C |
| ATOM | 7949 | C   | LEU | A | 515 | -0.571 | 30.937 | -17.553 | 1.00 | 0.00 | B | C |
| ATOM | 7950 | O   | LEU | A | 515 | -0.727 | 31.166 | -16.354 | 1.00 | 0.00 | B | O |
| ATOM | 7951 | N   | PHE | A | 516 | 0.264  | 31.664 | -18.317 | 1.00 | 0.00 | B | N |
| ATOM | 7952 | CA  | PHE | A | 516 | 1.098  | 32.681 | -17.743 | 1.00 | 0.00 | B | C |
| ATOM | 7953 | CB  | PHE | A | 516 | 2.035  | 33.352 | -18.764 | 1.00 | 0.00 | B | C |
| ATOM | 7954 | CG  | PHE | A | 516 | 3.089  | 32.360 | -19.128 | 1.00 | 0.00 | B | C |
| ATOM | 7955 | CD1 | PHE | A | 516 | 4.154  | 32.138 | -18.282 | 1.00 | 0.00 | B | C |
| ATOM | 7956 | CE1 | PHE | A | 516 | 5.135  | 31.231 | -18.606 | 1.00 | 0.00 | B | C |
| ATOM | 7957 | CZ  | PHE | A | 516 | 5.065  | 30.532 | -19.784 | 1.00 | 0.00 | B | C |
| ATOM | 7958 | CD2 | PHE | A | 516 | 3.030  | 31.657 | -20.309 | 1.00 | 0.00 | B | C |
| ATOM | 7959 | CE2 | PHE | A | 516 | 4.011  | 30.747 | -20.638 | 1.00 | 0.00 | B | C |
| ATOM | 7960 | C   | PHE | A | 516 | 0.247  | 33.739 | -17.113 | 1.00 | 0.00 | B | C |

|      |      |     |           |        |        |         |      |      |   |   |
|------|------|-----|-----------|--------|--------|---------|------|------|---|---|
| ATOM | 7961 | O   | PHE A 516 | 0.567  | 34.234 | -16.031 | 1.00 | 0.00 | B | O |
| ATOM | 7962 | N   | PHE A 517 | -0.861 | 34.117 | -17.768 | 1.00 | 0.00 | B | N |
| ATOM | 7963 | CA  | PHE A 517 | -1.728 | 35.141 | -17.254 | 1.00 | 0.00 | B | C |
| ATOM | 7964 | CB  | PHE A 517 | -2.911 | 35.434 | -18.194 | 1.00 | 0.00 | B | C |
| ATOM | 7965 | CG  | PHE A 517 | -3.911 | 36.235 | -17.433 | 1.00 | 0.00 | B | C |
| ATOM | 7966 | CD1 | PHE A 517 | -3.708 | 37.572 | -17.192 | 1.00 | 0.00 | B | C |
| ATOM | 7967 | CE1 | PHE A 517 | -4.632 | 38.304 | -16.484 | 1.00 | 0.00 | B | C |
| ATOM | 7968 | CZ  | PHE A 517 | -5.769 | 37.707 | -16.000 | 1.00 | 0.00 | B | C |
| ATOM | 7969 | CD2 | PHE A 517 | -5.047 | 35.639 | -16.931 | 1.00 | 0.00 | B | C |
| ATOM | 7970 | CE2 | PHE A 517 | -5.976 | 36.368 | -16.225 | 1.00 | 0.00 | B | C |
| ATOM | 7971 | C   | PHE A 517 | -2.285 | 34.723 | -15.930 | 1.00 | 0.00 | B | C |
| ATOM | 7972 | O   | PHE A 517 | -2.346 | 35.527 | -15.001 | 1.00 | 0.00 | B | O |
| ATOM | 7973 | N   | LEU A 518 | -2.709 | 33.455 | -15.807 | 1.00 | 0.00 | B | N |
| ATOM | 7974 | CA  | LEU A 518 | -3.334 | 33.008 | -14.595 | 1.00 | 0.00 | B | C |
| ATOM | 7975 | CB  | LEU A 518 | -3.891 | 31.578 | -14.680 | 1.00 | 0.00 | B | C |
| ATOM | 7976 | CG  | LEU A 518 | -4.606 | 31.139 | -13.385 | 1.00 | 0.00 | B | C |
| ATOM | 7977 | CD1 | LEU A 518 | -5.848 | 32.002 | -13.112 | 1.00 | 0.00 | B | C |
| ATOM | 7978 | CD2 | LEU A 518 | -4.926 | 29.635 | -13.400 | 1.00 | 0.00 | B | C |
| ATOM | 7979 | C   | LEU A 518 | -2.361 | 33.054 | -13.450 | 1.00 | 0.00 | B | C |
| ATOM | 7980 | O   | LEU A 518 | -2.724 | 33.421 | -12.340 | 1.00 | 0.00 | B | O |
| ATOM | 7981 | N   | GLN A 519 | -1.094 | 32.668 | -13.654 | 1.00 | 0.00 | B | N |
| ATOM | 7982 | CA  | GLN A 519 | -0.180 | 32.661 | -12.543 | 1.00 | 0.00 | B | C |
| ATOM | 7983 | CB  | GLN A 519 | 1.220  | 32.148 | -12.914 | 1.00 | 0.00 | B | C |
| ATOM | 7984 | CG  | GLN A 519 | 2.187  | 32.174 | -11.729 | 1.00 | 0.00 | B | C |
| ATOM | 7985 | CD  | GLN A 519 | 3.600  | 32.096 | -12.281 | 1.00 | 0.00 | B | C |
| ATOM | 7986 | OE1 | GLN A 519 | 3.805  | 31.965 | -13.487 | 1.00 | 0.00 | B | O |
| ATOM | 7987 | NE2 | GLN A 519 | 4.610  | 32.194 | -11.376 | 1.00 | 0.00 | B | N |
| ATOM | 7988 | C   | GLN A 519 | 0.048  | 34.050 | -12.040 | 1.00 | 0.00 | B | C |
| ATOM | 7989 | O   | GLN A 519 | 0.042  | 34.294 | -10.834 | 1.00 | 0.00 | B | O |
| ATOM | 7990 | N   | SER A 520 | 0.260  | 34.998 | -12.967 | 1.00 | 0.00 | B | N |
| ATOM | 7991 | CA  | SER A 520 | 0.609  | 36.335 | -12.590 | 1.00 | 0.00 | B | C |
| ATOM | 7992 | CB  | SER A 520 | 0.935  | 37.228 | -13.799 | 1.00 | 0.00 | B | C |
| ATOM | 7993 | OG  | SER A 520 | -0.192 | 37.322 | -14.655 | 1.00 | 0.00 | B | O |
| ATOM | 7994 | C   | SER A 520 | -0.515 | 36.956 | -11.826 | 1.00 | 0.00 | B | C |
| ATOM | 7995 | O   | SER A 520 | -0.277 | 37.683 | -10.862 | 1.00 | 0.00 | B | O |
| ATOM | 7996 | N   | LEU A 521 | -1.774 | 36.694 | -12.222 | 1.00 | 0.00 | B | N |
| ATOM | 7997 | CA  | LEU A 521 | -2.844 | 37.320 | -11.500 | 1.00 | 0.00 | B | C |
| ATOM | 7998 | CB  | LEU A 521 | -4.238 | 37.213 | -12.164 | 1.00 | 0.00 | B | C |

|      |      |     |     |   |     |        |        |         |      |      |   |   |
|------|------|-----|-----|---|-----|--------|--------|---------|------|------|---|---|
| ATOM | 7999 | CG  | LEU | A | 521 | -5.295 | 36.281 | -11.523 | 1.00 | 0.00 | B | C |
| ATOM | 8000 | CD1 | LEU | A | 521 | -4.862 | 34.825 | -11.450 | 1.00 | 0.00 | B | C |
| ATOM | 8001 | CD2 | LEU | A | 521 | -5.816 | 36.822 | -10.181 | 1.00 | 0.00 | B | C |
| ATOM | 8002 | C   | LEU | A | 521 | -2.875 | 36.738 | -10.119 | 1.00 | 0.00 | B | C |
| ATOM | 8003 | O   | LEU | A | 521 | -3.189 | 37.433 | -9.155  | 1.00 | 0.00 | B | O |
| ATOM | 8004 | N   | PHE | A | 522 | -2.535 | 35.440 | -9.982  | 1.00 | 0.00 | B | N |
| ATOM | 8005 | CA  | PHE | A | 522 | -2.559 | 34.797 | -8.697  | 1.00 | 0.00 | B | C |
| ATOM | 8006 | CB  | PHE | A | 522 | -2.166 | 33.306 | -8.729  | 1.00 | 0.00 | B | C |
| ATOM | 8007 | CG  | PHE | A | 522 | -3.406 | 32.498 | -8.927  | 1.00 | 0.00 | B | C |
| ATOM | 8008 | CD1 | PHE | A | 522 | -3.920 | 32.242 | -10.174 | 1.00 | 0.00 | B | C |
| ATOM | 8009 | CE1 | PHE | A | 522 | -5.069 | 31.493 | -10.315 | 1.00 | 0.00 | B | C |
| ATOM | 8010 | CZ  | PHE | A | 522 | -5.718 | 30.996 | -9.212  | 1.00 | 0.00 | B | C |
| ATOM | 8011 | CD2 | PHE | A | 522 | -4.067 | 31.996 | -7.828  | 1.00 | 0.00 | B | C |
| ATOM | 8012 | CE2 | PHE | A | 522 | -5.212 | 31.250 | -7.961  | 1.00 | 0.00 | B | C |
| ATOM | 8013 | C   | PHE | A | 522 | -1.630 | 35.506 | -7.770  | 1.00 | 0.00 | B | C |
| ATOM | 8014 | O   | PHE | A | 522 | -1.953 | 35.717 | -6.603  | 1.00 | 0.00 | B | O |
| ATOM | 8015 | N   | MET | A | 523 | -0.437 | 35.888 | -8.256  | 1.00 | 0.00 | B | N |
| ATOM | 8016 | CA  | MET | A | 523 | 0.477  | 36.582 | -7.401  | 1.00 | 0.00 | B | C |
| ATOM | 8017 | CB  | MET | A | 523 | 1.828  | 36.889 | -8.061  | 1.00 | 0.00 | B | C |
| ATOM | 8018 | CG  | MET | A | 523 | 2.857  | 37.397 | -7.048  | 1.00 | 0.00 | B | C |
| ATOM | 8019 | SD  | MET | A | 523 | 4.432  | 37.938 | -7.770  | 1.00 | 0.00 | B | S |
| ATOM | 8020 | CE  | MET | A | 523 | 3.720  | 39.401 | -8.575  | 1.00 | 0.00 | B | C |
| ATOM | 8021 | C   | MET | A | 523 | -0.131 | 37.900 | -7.010  | 1.00 | 0.00 | B | C |
| ATOM | 8022 | O   | MET | A | 523 | 0.023  | 38.353 | -5.880  | 1.00 | 0.00 | B | O |
| ATOM | 8023 | N   | LEU | A | 524 | -0.846 | 38.558 | -7.941  | 1.00 | 0.00 | B | N |
| ATOM | 8024 | CA  | LEU | A | 524 | -1.417 | 39.847 | -7.658  | 1.00 | 0.00 | B | C |
| ATOM | 8025 | CB  | LEU | A | 524 | -2.186 | 40.428 | -8.858  | 1.00 | 0.00 | B | C |
| ATOM | 8026 | CG  | LEU | A | 524 | -1.318 | 40.675 | -10.106 | 1.00 | 0.00 | B | C |
| ATOM | 8027 | CD1 | LEU | A | 524 | -2.156 | 41.261 | -11.255 | 1.00 | 0.00 | B | C |
| ATOM | 8028 | CD2 | LEU | A | 524 | -0.078 | 41.522 | -9.777  | 1.00 | 0.00 | B | C |
| ATOM | 8029 | C   | LEU | A | 524 | -2.403 | 39.695 | -6.547  | 1.00 | 0.00 | B | C |
| ATOM | 8030 | O   | LEU | A | 524 | -2.500 | 40.540 | -5.659  | 1.00 | 0.00 | B | O |
| ATOM | 8031 | N   | ALA | A | 525 | -3.177 | 38.598 | -6.567  | 1.00 | 0.00 | B | N |
| ATOM | 8032 | CA  | ALA | A | 525 | -4.165 | 38.396 | -5.551  | 1.00 | 0.00 | B | C |
| ATOM | 8033 | CB  | ALA | A | 525 | -4.965 | 37.098 | -5.750  | 1.00 | 0.00 | B | C |
| ATOM | 8034 | C   | ALA | A | 525 | -3.472 | 38.291 | -4.231  | 1.00 | 0.00 | B | C |
| ATOM | 8035 | O   | ALA | A | 525 | -3.946 | 38.823 | -3.228  | 1.00 | 0.00 | B | O |
| ATOM | 8036 | N   | THR | A | 526 | -2.320 | 37.595 | -4.188  | 1.00 | 0.00 | B | N |



|      |      |     |     |       |        |        |        |      |      |   |   |
|------|------|-----|-----|-------|--------|--------|--------|------|------|---|---|
| ATOM | 8037 | CA  | THR | A 526 | -1.659 | 37.432 | -2.929 | 1.00 | 0.00 | B | C |
| ATOM | 8038 | CB  | THR | A 526 | -0.481 | 36.495 | -2.964 | 1.00 | 0.00 | B | C |
| ATOM | 8039 | OG1 | THR | A 526 | 0.573  | 37.025 | -3.751 | 1.00 | 0.00 | B | O |
| ATOM | 8040 | CG2 | THR | A 526 | -0.950 | 35.149 | -3.548 | 1.00 | 0.00 | B | C |
| ATOM | 8041 | C   | THR | A 526 | -1.180 | 38.762 | -2.434 | 1.00 | 0.00 | B | C |
| ATOM | 8042 | O   | THR | A 526 | -1.279 | 39.048 | -1.242 | 1.00 | 0.00 | B | O |
| ATOM | 8043 | N   | VAL | A 527 | -0.659 | 39.620 | -3.334 | 1.00 | 0.00 | B | N |
| ATOM | 8044 | CA  | VAL | A 527 | -0.097 | 40.872 | -2.900 | 1.00 | 0.00 | B | C |
| ATOM | 8045 | CB  | VAL | A 527 | 0.573  | 41.672 | -3.987 | 1.00 | 0.00 | B | C |
| ATOM | 8046 | CG1 | VAL | A 527 | 1.660  | 40.797 | -4.634 | 1.00 | 0.00 | B | C |
| ATOM | 8047 | CG2 | VAL | A 527 | -0.478 | 42.236 | -4.952 | 1.00 | 0.00 | B | C |
| ATOM | 8048 | C   | VAL | A 527 | -1.156 | 41.728 | -2.279 | 1.00 | 0.00 | B | C |
| ATOM | 8049 | O   | VAL | A 527 | -0.917 | 42.369 | -1.256 | 1.00 | 0.00 | B | O |
| ATOM | 8050 | N   | VAL | A 528 | -2.364 | 41.772 | -2.871 | 1.00 | 0.00 | B | N |
| ATOM | 8051 | CA  | VAL | A 528 | -3.380 | 42.597 | -2.290 | 1.00 | 0.00 | B | C |
| ATOM | 8052 | CB  | VAL | A 528 | -4.668 | 42.611 | -3.068 | 1.00 | 0.00 | B | C |
| ATOM | 8053 | CG1 | VAL | A 528 | -4.380 | 43.170 | -4.472 | 1.00 | 0.00 | B | C |
| ATOM | 8054 | CG2 | VAL | A 528 | -5.290 | 41.208 | -3.066 | 1.00 | 0.00 | B | C |
| ATOM | 8055 | C   | VAL | A 528 | -3.654 | 42.054 | -0.927 | 1.00 | 0.00 | B | C |
| ATOM | 8056 | O   | VAL | A 528 | -3.848 | 42.804 | 0.026  | 1.00 | 0.00 | B | O |
| ATOM | 8057 | N   | LEU | A 529 | -3.661 | 40.715 | -0.814 | 1.00 | 0.00 | B | N |
| ATOM | 8058 | CA  | LEU | A 529 | -3.926 | 40.034 | 0.416  | 1.00 | 0.00 | B | C |
| ATOM | 8059 | CB  | LEU | A 529 | -4.018 | 38.507 | 0.251  | 1.00 | 0.00 | B | C |
| ATOM | 8060 | CG  | LEU | A 529 | -5.189 | 38.044 | -0.639 | 1.00 | 0.00 | B | C |
| ATOM | 8061 | CD1 | LEU | A 529 | -5.248 | 36.511 | -0.736 | 1.00 | 0.00 | B | C |
| ATOM | 8062 | CD2 | LEU | A 529 | -6.519 | 38.662 | -0.177 | 1.00 | 0.00 | B | C |
| ATOM | 8063 | C   | LEU | A 529 | -2.828 | 40.329 | 1.383  | 1.00 | 0.00 | B | C |
| ATOM | 8064 | O   | LEU | A 529 | -3.078 | 40.366 | 2.576  | 1.00 | 0.00 | B | O |
| ATOM | 8065 | N   | TYR | A 530 | -1.580 | 40.506 | 0.916  | 1.00 | 0.00 | B | N |
| ATOM | 8066 | CA  | TYR | A 530 | -0.431 | 40.771 | 1.746  | 1.00 | 0.00 | B | C |
| ATOM | 8067 | CB  | TYR | A 530 | 0.823  | 40.870 | 0.856  | 1.00 | 0.00 | B | C |
| ATOM | 8068 | CG  | TYR | A 530 | 2.094  | 40.774 | 1.630  | 1.00 | 0.00 | B | C |
| ATOM | 8069 | CD1 | TYR | A 530 | 2.633  | 39.540 | 1.912  | 1.00 | 0.00 | B | C |
| ATOM | 8070 | CE1 | TYR | A 530 | 3.812  | 39.426 | 2.612  | 1.00 | 0.00 | B | C |
| ATOM | 8071 | CZ  | TYR | A 530 | 4.464  | 40.557 | 3.032  | 1.00 | 0.00 | B | C |
| ATOM | 8072 | OH  | TYR | A 530 | 5.673  | 40.445 | 3.750  | 1.00 | 0.00 | B | O |
| ATOM | 8073 | CD2 | TYR | A 530 | 2.760  | 41.903 | 2.048  | 1.00 | 0.00 | B | C |
| ATOM | 8074 | CE2 | TYR | A 530 | 3.939  | 41.797 | 2.748  | 1.00 | 0.00 | B | C |

|      |      |     |           |        |        |        |      |      |   |   |
|------|------|-----|-----------|--------|--------|--------|------|------|---|---|
| ATOM | 8075 | C   | TYR A 530 | -0.657 | 42.096 | 2.408  | 1.00 | 0.00 | B | C |
| ATOM | 8076 | O   | TYR A 530 | -0.392 | 42.272 | 3.597  | 1.00 | 0.00 | B | O |
| ATOM | 8077 | N   | PHE A 531 | -1.162 | 43.075 | 1.636  | 1.00 | 0.00 | B | N |
| ATOM | 8078 | CA  | PHE A 531 | -1.448 | 44.364 | 2.188  | 1.00 | 0.00 | B | C |
| ATOM | 8079 | CB  | PHE A 531 | -1.904 | 45.402 | 1.150  | 1.00 | 0.00 | B | C |
| ATOM | 8080 | CG  | PHE A 531 | -0.669 | 45.822 | 0.442  | 1.00 | 0.00 | B | C |
| ATOM | 8081 | CD1 | PHE A 531 | 0.238  | 46.623 | 1.096  | 1.00 | 0.00 | B | C |
| ATOM | 8082 | CE1 | PHE A 531 | 1.391  | 47.032 | 0.471  | 1.00 | 0.00 | B | C |
| ATOM | 8083 | CZ  | PHE A 531 | 1.640  | 46.641 | -0.822 | 1.00 | 0.00 | B | C |
| ATOM | 8084 | CD2 | PHE A 531 | -0.417 | 45.438 | -0.855 | 1.00 | 0.00 | B | C |
| ATOM | 8085 | CE2 | PHE A 531 | 0.736  | 45.845 | -1.483 | 1.00 | 0.00 | B | C |
| ATOM | 8086 | C   | PHE A 531 | -2.526 | 44.209 | 3.206  | 1.00 | 0.00 | B | C |
| ATOM | 8087 | O   | PHE A 531 | -2.474 | 44.828 | 4.267  | 1.00 | 0.00 | B | O |
| ATOM | 8088 | N   | SER A 532 | -3.546 | 43.387 | 2.896  | 1.00 | 0.00 | B | N |
| ATOM | 8089 | CA  | SER A 532 | -4.596 | 43.175 | 3.848  | 1.00 | 0.00 | B | C |
| ATOM | 8090 | CB  | SER A 532 | -5.834 | 42.450 | 3.277  | 1.00 | 0.00 | B | C |
| ATOM | 8091 | OG  | SER A 532 | -5.511 | 41.142 | 2.830  | 1.00 | 0.00 | B | O |
| ATOM | 8092 | C   | SER A 532 | -4.020 | 42.382 | 4.980  | 1.00 | 0.00 | B | C |
| ATOM | 8093 | O   | SER A 532 | -4.586 | 42.330 | 6.068  | 1.00 | 0.00 | B | O |
| ATOM | 8094 | N   | HSD A 533 | -2.863 | 41.753 | 4.709  | 1.00 | 0.00 | B | N |
| ATOM | 8095 | CA  | HSD A 533 | -2.049 | 40.932 | 5.557  | 1.00 | 0.00 | B | C |
| ATOM | 8096 | CB  | HSD A 533 | -1.356 | 41.708 | 6.695  | 1.00 | 0.00 | B | C |
| ATOM | 8097 | ND1 | HSD A 533 | -2.951 | 41.672 | 8.670  | 1.00 | 0.00 | B | N |
| ATOM | 8098 | CG  | HSD A 533 | -2.308 | 42.350 | 7.658  | 1.00 | 0.00 | B | C |
| ATOM | 8099 | CE1 | HSD A 533 | -3.728 | 42.580 | 9.314  | 1.00 | 0.00 | B | C |
| ATOM | 8100 | NE2 | HSD A 533 | -3.628 | 43.788 | 8.789  | 1.00 | 0.00 | B | N |
| ATOM | 8101 | CD2 | HSD A 533 | -2.732 | 43.641 | 7.743  | 1.00 | 0.00 | B | C |
| ATOM | 8102 | C   | HSD A 533 | -2.796 | 39.769 | 6.139  | 1.00 | 0.00 | B | C |
| ATOM | 8103 | O   | HSD A 533 | -2.510 | 39.364 | 7.258  | 1.00 | 0.00 | B | O |
| ATOM | 8104 | N   | LEU A 534 | -3.748 | 39.159 | 5.407  | 1.00 | 0.00 | B | N |
| ATOM | 8105 | CA  | LEU A 534 | -4.412 | 38.004 | 5.958  | 1.00 | 0.00 | B | C |
| ATOM | 8106 | CB  | LEU A 534 | -5.762 | 37.690 | 5.292  | 1.00 | 0.00 | B | C |
| ATOM | 8107 | CG  | LEU A 534 | -6.791 | 38.826 | 5.459  | 1.00 | 0.00 | B | C |
| ATOM | 8108 | CD1 | LEU A 534 | -8.140 | 38.463 | 4.821  | 1.00 | 0.00 | B | C |
| ATOM | 8109 | CD2 | LEU A 534 | -6.918 | 39.254 | 6.929  | 1.00 | 0.00 | B | C |
| ATOM | 8110 | C   | LEU A 534 | -3.508 | 36.830 | 5.742  | 1.00 | 0.00 | B | C |
| ATOM | 8111 | O   | LEU A 534 | -2.825 | 36.757 | 4.728  | 1.00 | 0.00 | B | O |
| ATOM | 8112 | N   | LYS A 535 | -3.496 | 35.874 | 6.689  | 1.00 | 0.00 | B | N |

|      |      |     |     |   |     |        |        |        |      |      |   |   |
|------|------|-----|-----|---|-----|--------|--------|--------|------|------|---|---|
| ATOM | 8113 | CA  | LYS | A | 535 | -2.633 | 34.721 | 6.658  | 1.00 | 0.00 | B | C |
| ATOM | 8114 | CB  | LYS | A | 535 | -2.771 | 33.859 | 7.920  | 1.00 | 0.00 | B | C |
| ATOM | 8115 | CG  | LYS | A | 535 | -2.227 | 34.532 | 9.182  | 1.00 | 0.00 | B | C |
| ATOM | 8116 | CD  | LYS | A | 535 | -2.681 | 33.867 | 10.483 | 1.00 | 0.00 | B | C |
| ATOM | 8117 | CE  | LYS | A | 535 | -2.419 | 32.361 | 10.532 | 1.00 | 0.00 | B | C |
| ATOM | 8118 | NZ  | LYS | A | 535 | -3.412 | 31.648 | 9.697  | 1.00 | 0.00 | B | N |
| ATOM | 8119 | C   | LYS | A | 535 | -2.958 | 33.854 | 5.479  | 1.00 | 0.00 | B | C |
| ATOM | 8120 | O   | LYS | A | 535 | -2.067 | 33.253 | 4.879  | 1.00 | 0.00 | B | O |
| ATOM | 8121 | N   | GLU | A | 536 | -4.244 | 33.783 | 5.103  | 1.00 | 0.00 | B | N |
| ATOM | 8122 | CA  | GLU | A | 536 | -4.691 | 32.911 | 4.050  | 1.00 | 0.00 | B | C |
| ATOM | 8123 | CB  | GLU | A | 536 | -6.210 | 32.907 | 3.814  | 1.00 | 0.00 | B | C |
| ATOM | 8124 | CG  | GLU | A | 536 | -6.988 | 32.060 | 4.819  | 1.00 | 0.00 | B | C |
| ATOM | 8125 | CD  | GLU | A | 536 | -8.351 | 31.779 | 4.205  | 1.00 | 0.00 | B | C |
| ATOM | 8126 | OE1 | GLU | A | 536 | -8.817 | 32.626 | 3.394  | 1.00 | 0.00 | B | O |
| ATOM | 8127 | OE2 | GLU | A | 536 | -8.941 | 30.715 | 4.530  | 1.00 | 0.00 | B | O |
| ATOM | 8128 | C   | GLU | A | 536 | -4.046 | 33.279 | 2.756  | 1.00 | 0.00 | B | C |
| ATOM | 8129 | O   | GLU | A | 536 | -4.013 | 32.473 | 1.827  | 1.00 | 0.00 | B | O |
| ATOM | 8130 | N   | TYR | A | 537 | -3.517 | 34.510 | 2.651  | 1.00 | 0.00 | B | N |
| ATOM | 8131 | CA  | TYR | A | 537 | -3.003 | 35.000 | 1.403  | 1.00 | 0.00 | B | C |
| ATOM | 8132 | CB  | TYR | A | 537 | -2.372 | 36.404 | 1.500  | 1.00 | 0.00 | B | C |
| ATOM | 8133 | CG  | TYR | A | 537 | -0.949 | 36.324 | 1.944  | 1.00 | 0.00 | B | C |
| ATOM | 8134 | CD1 | TYR | A | 537 | -0.600 | 36.210 | 3.267  | 1.00 | 0.00 | B | C |
| ATOM | 8135 | CE1 | TYR | A | 537 | 0.713  | 36.143 | 3.664  | 1.00 | 0.00 | B | C |
| ATOM | 8136 | CZ  | TYR | A | 537 | 1.704  | 36.187 | 2.717  | 1.00 | 0.00 | B | C |
| ATOM | 8137 | OH  | TYR | A | 537 | 3.059  | 36.121 | 3.108  | 1.00 | 0.00 | B | O |
| ATOM | 8138 | CD2 | TYR | A | 537 | 0.056  | 36.359 | 1.007  | 1.00 | 0.00 | B | C |
| ATOM | 8139 | CE2 | TYR | A | 537 | 1.373  | 36.295 | 1.389  | 1.00 | 0.00 | B | C |
| ATOM | 8140 | C   | TYR | A | 537 | -1.944 | 34.061 | 0.907  | 1.00 | 0.00 | B | C |
| ATOM | 8141 | O   | TYR | A | 537 | -1.835 | 33.826 | -0.295 | 1.00 | 0.00 | B | O |
| ATOM | 8142 | N   | VAL | A | 538 | -1.151 | 33.473 | 1.819  | 1.00 | 0.00 | B | N |
| ATOM | 8143 | CA  | VAL | A | 538 | -0.041 | 32.652 | 1.422  | 1.00 | 0.00 | B | C |
| ATOM | 8144 | CB  | VAL | A | 538 | 0.663  | 32.018 | 2.584  | 1.00 | 0.00 | B | C |
| ATOM | 8145 | CG1 | VAL | A | 538 | -0.287 | 31.010 | 3.250  | 1.00 | 0.00 | B | C |
| ATOM | 8146 | CG2 | VAL | A | 538 | 1.985  | 31.409 | 2.081  | 1.00 | 0.00 | B | C |
| ATOM | 8147 | C   | VAL | A | 538 | -0.478 | 31.562 | 0.492  | 1.00 | 0.00 | B | C |
| ATOM | 8148 | O   | VAL | A | 538 | 0.180  | 31.346 | -0.524 | 1.00 | 0.00 | B | O |
| ATOM | 8149 | N   | ALA | A | 539 | -1.624 | 30.901 | 0.761  | 1.00 | 0.00 | B | N |
| ATOM | 8150 | CA  | ALA | A | 539 | -2.033 | 29.766 | -0.025 | 1.00 | 0.00 | B | C |

|      |      |     |           |        |        |        |      |      |   |   |
|------|------|-----|-----------|--------|--------|--------|------|------|---|---|
| ATOM | 8151 | CB  | ALA A 539 | -3.425 | 29.231 | 0.360  | 1.00 | 0.00 | B | C |
| ATOM | 8152 | C   | ALA A 539 | -2.100 | 30.180 | -1.462 | 1.00 | 0.00 | B | C |
| ATOM | 8153 | O   | ALA A 539 | -1.713 | 29.418 | -2.347 | 1.00 | 0.00 | B | O |
| ATOM | 8154 | N   | SER A 540 | -2.577 | 31.406 | -1.731 | 1.00 | 0.00 | B | N |
| ATOM | 8155 | CA  | SER A 540 | -2.660 | 31.887 | -3.080 | 1.00 | 0.00 | B | C |
| ATOM | 8156 | CB  | SER A 540 | -3.289 | 33.289 | -3.167 | 1.00 | 0.00 | B | C |
| ATOM | 8157 | OG  | SER A 540 | -4.636 | 33.246 | -2.722 | 1.00 | 0.00 | B | O |
| ATOM | 8158 | C   | SER A 540 | -1.276 | 31.985 | -3.655 | 1.00 | 0.00 | B | C |
| ATOM | 8159 | O   | SER A 540 | -1.052 | 31.650 | -4.818 | 1.00 | 0.00 | B | O |
| ATOM | 8160 | N   | MET A 541 | -0.306 | 32.453 | -2.848 | 1.00 | 0.00 | B | N |
| ATOM | 8161 | CA  | MET A 541 | 1.047  | 32.590 | -3.309 | 1.00 | 0.00 | B | C |
| ATOM | 8162 | CB  | MET A 541 | 1.996  | 33.219 | -2.277 | 1.00 | 0.00 | B | C |
| ATOM | 8163 | CG  | MET A 541 | 1.754  | 34.707 | -2.034 | 1.00 | 0.00 | B | C |
| ATOM | 8164 | SD  | MET A 541 | 3.059  | 35.495 | -1.048 | 1.00 | 0.00 | B | S |
| ATOM | 8165 | CE  | MET A 541 | 4.343  | 35.272 | -2.315 | 1.00 | 0.00 | B | C |
| ATOM | 8166 | C   | MET A 541 | 1.590  | 31.232 | -3.619 | 1.00 | 0.00 | B | C |
| ATOM | 8167 | O   | MET A 541 | 2.323  | 31.054 | -4.592 | 1.00 | 0.00 | B | O |
| ATOM | 8168 | N   | VAL A 542 | 1.226  | 30.230 | -2.798 | 1.00 | 0.00 | B | N |
| ATOM | 8169 | CA  | VAL A 542 | 1.734  | 28.900 | -2.969 | 1.00 | 0.00 | B | C |
| ATOM | 8170 | CB  | VAL A 542 | 1.127  | 27.915 | -2.012 | 1.00 | 0.00 | B | C |
| ATOM | 8171 | CG1 | VAL A 542 | 1.611  | 26.508 | -2.397 | 1.00 | 0.00 | B | C |
| ATOM | 8172 | CG2 | VAL A 542 | 1.488  | 28.322 | -0.575 | 1.00 | 0.00 | B | C |
| ATOM | 8173 | C   | VAL A 542 | 1.369  | 28.449 | -4.342 | 1.00 | 0.00 | B | C |
| ATOM | 8174 | O   | VAL A 542 | 2.181  | 27.836 | -5.036 | 1.00 | 0.00 | B | O |
| ATOM | 8175 | N   | PHE A 543 | 0.135  | 28.747 | -4.781 | 1.00 | 0.00 | B | N |
| ATOM | 8176 | CA  | PHE A 543 | -0.242 | 28.378 | -6.116 | 1.00 | 0.00 | B | C |
| ATOM | 8177 | CB  | PHE A 543 | -1.649 | 28.846 | -6.538 | 1.00 | 0.00 | B | C |
| ATOM | 8178 | CG  | PHE A 543 | -2.648 | 27.799 | -6.210 | 1.00 | 0.00 | B | C |
| ATOM | 8179 | CD1 | PHE A 543 | -3.134 | 27.631 | -4.936 | 1.00 | 0.00 | B | C |
| ATOM | 8180 | CE1 | PHE A 543 | -4.063 | 26.649 | -4.679 | 1.00 | 0.00 | B | C |
| ATOM | 8181 | CZ  | PHE A 543 | -4.516 | 25.837 | -5.693 | 1.00 | 0.00 | B | C |
| ATOM | 8182 | CD2 | PHE A 543 | -3.111 | 26.986 | -7.219 | 1.00 | 0.00 | B | C |
| ATOM | 8183 | CE2 | PHE A 543 | -4.039 | 26.006 | -6.969 | 1.00 | 0.00 | B | C |
| ATOM | 8184 | C   | PHE A 543 | 0.677  | 29.065 | -7.068 | 1.00 | 0.00 | B | C |
| ATOM | 8185 | O   | PHE A 543 | 1.135  | 28.468 | -8.043 | 1.00 | 0.00 | B | O |
| ATOM | 8186 | N   | SER A 544 | 0.967  | 30.345 | -6.802 | 1.00 | 0.00 | B | N |
| ATOM | 8187 | CA  | SER A 544 | 1.745  | 31.142 | -7.705 | 1.00 | 0.00 | B | C |
| ATOM | 8188 | CB  | SER A 544 | 1.920  | 32.588 | -7.200 | 1.00 | 0.00 | B | C |

|      |      |     |           |        |        |         |      |      |   |   |
|------|------|-----|-----------|--------|--------|---------|------|------|---|---|
| ATOM | 8189 | OG  | SER A 544 | 2.698  | 33.347 | -8.114  | 1.00 | 0.00 | B | O |
| ATOM | 8190 | C   | SER A 544 | 3.115  | 30.566 | -7.902  | 1.00 | 0.00 | B | C |
| ATOM | 8191 | O   | SER A 544 | 3.597  | 30.505 | -9.032  | 1.00 | 0.00 | B | O |
| ATOM | 8192 | N   | LEU A 545 | 3.784  | 30.133 | -6.819  | 1.00 | 0.00 | B | N |
| ATOM | 8193 | CA  | LEU A 545 | 5.140  | 29.665 | -6.937  | 1.00 | 0.00 | B | C |
| ATOM | 8194 | CB  | LEU A 545 | 5.777  | 29.313 | -5.587  | 1.00 | 0.00 | B | C |
| ATOM | 8195 | CG  | LEU A 545 | 7.225  | 28.813 | -5.738  | 1.00 | 0.00 | B | C |
| ATOM | 8196 | CD1 | LEU A 545 | 8.151  | 29.906 | -6.292  | 1.00 | 0.00 | B | C |
| ATOM | 8197 | CD2 | LEU A 545 | 7.745  | 28.212 | -4.426  | 1.00 | 0.00 | B | C |
| ATOM | 8198 | C   | LEU A 545 | 5.235  | 28.430 | -7.778  | 1.00 | 0.00 | B | C |
| ATOM | 8199 | O   | LEU A 545 | 6.114  | 28.333 | -8.634  | 1.00 | 0.00 | B | O |
| ATOM | 8200 | N   | ALA A 546 | 4.360  | 27.437 | -7.518  | 1.00 | 0.00 | B | N |
| ATOM | 8201 | CA  | ALA A 546 | 4.351  | 26.174 | -8.211  | 1.00 | 0.00 | B | C |
| ATOM | 8202 | CB  | ALA A 546 | 3.365  | 25.170 | -7.593  | 1.00 | 0.00 | B | C |
| ATOM | 8203 | C   | ALA A 546 | 3.954  | 26.360 | -9.642  | 1.00 | 0.00 | B | C |
| ATOM | 8204 | O   | ALA A 546 | 4.548  | 25.769 | -10.542 | 1.00 | 0.00 | B | O |
| ATOM | 8205 | N   | LEU A 547 | 2.933  | 27.200 | -9.882  | 1.00 | 0.00 | B | N |
| ATOM | 8206 | CA  | LEU A 547 | 2.415  | 27.382 | -11.204 | 1.00 | 0.00 | B | C |
| ATOM | 8207 | CB  | LEU A 547 | 1.234  | 28.370 | -11.259 | 1.00 | 0.00 | B | C |
| ATOM | 8208 | CG  | LEU A 547 | -0.037 | 27.883 | -10.536 | 1.00 | 0.00 | B | C |
| ATOM | 8209 | CD1 | LEU A 547 | -1.175 | 28.909 | -10.665 | 1.00 | 0.00 | B | C |
| ATOM | 8210 | CD2 | LEU A 547 | -0.447 | 26.480 | -11.013 | 1.00 | 0.00 | B | C |
| ATOM | 8211 | C   | LEU A 547 | 3.492  | 27.949 | -12.070 | 1.00 | 0.00 | B | C |
| ATOM | 8212 | O   | LEU A 547 | 3.653  | 27.545 | -13.221 | 1.00 | 0.00 | B | O |
| ATOM | 8213 | N   | GLY A 548 | 4.263  | 28.909 | -11.533 | 1.00 | 0.00 | B | N |
| ATOM | 8214 | CA  | GLY A 548 | 5.286  | 29.536 | -12.315 | 1.00 | 0.00 | B | C |
| ATOM | 8215 | C   | GLY A 548 | 6.303  | 28.516 | -12.719 | 1.00 | 0.00 | B | C |
| ATOM | 8216 | O   | GLY A 548 | 6.766  | 28.512 | -13.858 | 1.00 | 0.00 | B | O |
| ATOM | 8217 | N   | TRP A 549 | 6.685  | 27.615 | -11.793 | 1.00 | 0.00 | B | N |
| ATOM | 8218 | CA  | TRP A 549 | 7.680  | 26.639 | -12.128 | 1.00 | 0.00 | B | C |
| ATOM | 8219 | CB  | TRP A 549 | 8.102  | 25.733 | -10.959 | 1.00 | 0.00 | B | C |
| ATOM | 8220 | CG  | TRP A 549 | 9.076  | 26.395 | -10.021 | 1.00 | 0.00 | B | C |
| ATOM | 8221 | CD1 | TRP A 549 | 8.927  | 26.852 | -8.743  | 1.00 | 0.00 | B | C |
| ATOM | 8222 | NE1 | TRP A 549 | 10.105 | 27.406 | -8.304  | 1.00 | 0.00 | B | N |
| ATOM | 8223 | CE2 | TRP A 549 | 11.038 | 27.315 | -9.317  | 1.00 | 0.00 | B | C |
| ATOM | 8224 | CD2 | TRP A 549 | 10.427 | 26.690 | -10.405 | 1.00 | 0.00 | B | C |
| ATOM | 8225 | CE3 | TRP A 549 | 11.098 | 26.460 | -11.570 | 1.00 | 0.00 | B | C |
| ATOM | 8226 | CZ3 | TRP A 549 | 12.412 | 26.867 | -11.631 | 1.00 | 0.00 | B | C |

|      |      |               |        |        |         |      |      |   |   |
|------|------|---------------|--------|--------|---------|------|------|---|---|
| ATOM | 8227 | CZ2 TRP A 549 | 12.340 | 27.721 | -9.382  | 1.00 | 0.00 | B | C |
| ATOM | 8228 | CH2 TRP A 549 | 13.020 | 27.483 | -10.557 | 1.00 | 0.00 | B | C |
| ATOM | 8229 | C TRP A 549   | 7.185  | 25.765 | -13.234 | 1.00 | 0.00 | B | C |
| ATOM | 8230 | O TRP A 549   | 7.917  | 25.489 | -14.182 | 1.00 | 0.00 | B | O |
| ATOM | 8231 | N THR A 550   | 5.920  | 25.324 | -13.159 | 1.00 | 0.00 | B | N |
| ATOM | 8232 | CA THR A 550  | 5.408  | 24.440 | -14.166 | 1.00 | 0.00 | B | C |
| ATOM | 8233 | CB THR A 550  | 3.995  | 24.013 | -13.900 | 1.00 | 0.00 | B | C |
| ATOM | 8234 | OG1 THR A 550 | 3.110  | 25.120 | -13.986 | 1.00 | 0.00 | B | O |
| ATOM | 8235 | CG2 THR A 550 | 3.942  | 23.414 | -12.484 | 1.00 | 0.00 | B | C |
| ATOM | 8236 | C THR A 550   | 5.453  | 25.164 | -15.479 | 1.00 | 0.00 | B | C |
| ATOM | 8237 | O THR A 550   | 5.739  | 24.569 | -16.516 | 1.00 | 0.00 | B | O |
| ATOM | 8238 | N ASN A 551   | 5.174  | 26.479 | -15.454 | 1.00 | 0.00 | B | N |
| ATOM | 8239 | CA ASN A 551  | 5.151  | 27.314 | -16.626 | 1.00 | 0.00 | B | C |
| ATOM | 8240 | CB ASN A 551  | 4.743  | 28.767 | -16.324 | 1.00 | 0.00 | B | C |
| ATOM | 8241 | CG ASN A 551  | 3.280  | 28.803 | -15.910 | 1.00 | 0.00 | B | C |
| ATOM | 8242 | OD1 ASN A 551 | 2.530  | 27.853 | -16.127 | 1.00 | 0.00 | B | O |
| ATOM | 8243 | ND2 ASN A 551 | 2.855  | 29.944 | -15.302 | 1.00 | 0.00 | B | N |
| ATOM | 8244 | C ASN A 551   | 6.525  | 27.380 | -17.232 | 1.00 | 0.00 | B | C |
| ATOM | 8245 | O ASN A 551   | 6.668  | 27.455 | -18.453 | 1.00 | 0.00 | B | O |
| ATOM | 8246 | N MET A 552   | 7.573  | 27.321 | -16.393 | 1.00 | 0.00 | B | N |
| ATOM | 8247 | CA MET A 552  | 8.941  | 27.518 | -16.802 | 1.00 | 0.00 | B | C |
| ATOM | 8248 | CB MET A 552  | 9.935  | 27.417 | -15.633 | 1.00 | 0.00 | B | C |
| ATOM | 8249 | CG MET A 552  | 11.326 | 27.940 | -15.997 | 1.00 | 0.00 | B | C |
| ATOM | 8250 | SD MET A 552  | 12.556 | 27.855 | -14.663 | 1.00 | 0.00 | B | S |
| ATOM | 8251 | CE MET A 552  | 12.968 | 26.108 | -14.910 | 1.00 | 0.00 | B | C |
| ATOM | 8252 | C MET A 552   | 9.342  | 26.491 | -17.819 | 1.00 | 0.00 | B | C |
| ATOM | 8253 | O MET A 552   | 10.175 | 26.753 | -18.685 | 1.00 | 0.00 | B | O |
| ATOM | 8254 | N LEU A 553   | 8.741  | 25.293 | -17.746 | 1.00 | 0.00 | B | N |
| ATOM | 8255 | CA LEU A 553  | 9.064  | 24.151 | -18.561 | 1.00 | 0.00 | B | C |
| ATOM | 8256 | CB LEU A 553  | 8.078  | 22.997 | -18.338 | 1.00 | 0.00 | B | C |
| ATOM | 8257 | CG LEU A 553  | 7.824  | 22.692 | -16.855 | 1.00 | 0.00 | B | C |
| ATOM | 8258 | CD1 LEU A 553 | 7.066  | 21.365 | -16.682 | 1.00 | 0.00 | B | C |
| ATOM | 8259 | CD2 LEU A 553 | 9.109  | 22.805 | -16.028 | 1.00 | 0.00 | B | C |
| ATOM | 8260 | C LEU A 553   | 8.895  | 24.511 | -20.013 | 1.00 | 0.00 | B | C |
| ATOM | 8261 | O LEU A 553   | 9.535  | 23.933 | -20.889 | 1.00 | 0.00 | B | O |
| ATOM | 8262 | N TYR A 554   | 7.992  | 25.466 | -20.283 | 1.00 | 0.00 | B | N |
| ATOM | 8263 | CA TYR A 554  | 7.577  | 25.944 | -21.577 | 1.00 | 0.00 | B | C |
| ATOM | 8264 | CB TYR A 554  | 6.495  | 27.029 | -21.397 | 1.00 | 0.00 | B | C |

|      |      |     |     |       |        |        |         |      |      |   |   |
|------|------|-----|-----|-------|--------|--------|---------|------|------|---|---|
| ATOM | 8265 | CG  | TYR | A 554 | 6.554  | 28.084 | -22.447 | 1.00 | 0.00 | B | C |
| ATOM | 8266 | CD1 | TYR | A 554 | 6.199  | 27.862 | -23.758 | 1.00 | 0.00 | B | C |
| ATOM | 8267 | CE1 | TYR | A 554 | 6.265  | 28.890 | -24.675 | 1.00 | 0.00 | B | C |
| ATOM | 8268 | CZ  | TYR | A 554 | 6.674  | 30.145 | -24.290 | 1.00 | 0.00 | B | C |
| ATOM | 8269 | OH  | TYR | A 554 | 6.742  | 31.199 | -25.226 | 1.00 | 0.00 | B | O |
| ATOM | 8270 | CD2 | TYR | A 554 | 6.951  | 29.346 | -22.073 | 1.00 | 0.00 | B | C |
| ATOM | 8271 | CE2 | TYR | A 554 | 7.017  | 30.375 | -22.982 | 1.00 | 0.00 | B | C |
| ATOM | 8272 | C   | TYR | A 554 | 8.714  | 26.483 | -22.406 | 1.00 | 0.00 | B | C |
| ATOM | 8273 | O   | TYR | A 554 | 8.755  | 26.256 | -23.614 | 1.00 | 0.00 | B | O |
| ATOM | 8274 | N   | TYR | A 555 | 9.686  | 27.170 | -21.787 | 1.00 | 0.00 | B | N |
| ATOM | 8275 | CA  | TYR | A 555 | 10.759 | 27.807 | -22.502 | 1.00 | 0.00 | B | C |
| ATOM | 8276 | CB  | TYR | A 555 | 11.785 | 28.535 | -21.609 | 1.00 | 0.00 | B | C |
| ATOM | 8277 | CG  | TYR | A 555 | 11.255 | 29.887 | -21.269 | 1.00 | 0.00 | B | C |
| ATOM | 8278 | CD1 | TYR | A 555 | 11.420 | 30.919 | -22.168 | 1.00 | 0.00 | B | C |
| ATOM | 8279 | CE1 | TYR | A 555 | 10.953 | 32.180 | -21.892 | 1.00 | 0.00 | B | C |
| ATOM | 8280 | CZ  | TYR | A 555 | 10.311 | 32.425 | -20.704 | 1.00 | 0.00 | B | C |
| ATOM | 8281 | OH  | TYR | A 555 | 9.831  | 33.722 | -20.422 | 1.00 | 0.00 | B | O |
| ATOM | 8282 | CD2 | TYR | A 555 | 10.614 | 30.142 | -20.078 | 1.00 | 0.00 | B | C |
| ATOM | 8283 | CE2 | TYR | A 555 | 10.141 | 31.405 | -19.797 | 1.00 | 0.00 | B | C |
| ATOM | 8284 | C   | TYR | A 555 | 11.498 | 26.825 | -23.344 | 1.00 | 0.00 | B | C |
| ATOM | 8285 | O   | TYR | A 555 | 12.086 | 27.195 | -24.356 | 1.00 | 0.00 | B | O |
| ATOM | 8286 | N   | THR | A 556 | 11.527 | 25.552 | -22.943 | 1.00 | 0.00 | B | N |
| ATOM | 8287 | CA  | THR | A 556 | 12.274 | 24.563 | -23.657 | 1.00 | 0.00 | B | C |
| ATOM | 8288 | CB  | THR | A 556 | 12.248 | 23.237 | -22.973 | 1.00 | 0.00 | B | C |
| ATOM | 8289 | OG1 | THR | A 556 | 12.609 | 23.394 | -21.609 | 1.00 | 0.00 | B | O |
| ATOM | 8290 | CG2 | THR | A 556 | 13.317 | 22.364 | -23.645 | 1.00 | 0.00 | B | C |
| ATOM | 8291 | C   | THR | A 556 | 11.719 | 24.434 | -25.051 | 1.00 | 0.00 | B | C |
| ATOM | 8292 | O   | THR | A 556 | 12.392 | 23.932 | -25.946 | 1.00 | 0.00 | B | O |
| ATOM | 8293 | N   | ARG | A 557 | 10.462 | 24.860 | -25.279 | 1.00 | 0.00 | B | N |
| ATOM | 8294 | CA  | ARG | A 557 | 9.810  | 24.718 | -26.557 | 1.00 | 0.00 | B | C |
| ATOM | 8295 | CB  | ARG | A 557 | 8.408  | 25.355 | -26.580 | 1.00 | 0.00 | B | C |
| ATOM | 8296 | CG  | ARG | A 557 | 7.420  | 24.638 | -25.657 | 1.00 | 0.00 | B | C |
| ATOM | 8297 | CD  | ARG | A 557 | 6.073  | 25.348 | -25.484 | 1.00 | 0.00 | B | C |
| ATOM | 8298 | NE  | ARG | A 557 | 5.260  | 25.115 | -26.710 | 1.00 | 0.00 | B | N |
| ATOM | 8299 | CZ  | ARG | A 557 | 3.898  | 25.090 | -26.644 | 1.00 | 0.00 | B | C |
| ATOM | 8300 | NH1 | ARG | A 557 | 3.249  | 25.239 | -25.449 | 1.00 | 0.00 | B | N |
| ATOM | 8301 | NH2 | ARG | A 557 | 3.173  | 24.909 | -27.787 | 1.00 | 0.00 | B | N |
| ATOM | 8302 | C   | ARG | A 557 | 10.620 | 25.306 | -27.678 | 1.00 | 0.00 | B | C |

|      |      |     |           |        |        |         |      |      |   |   |
|------|------|-----|-----------|--------|--------|---------|------|------|---|---|
| ATOM | 8303 | O   | ARG A 557 | 11.315 | 26.314 | -27.530 | 1.00 | 0.00 | B | O |
| ATOM | 8304 | N   | GLY A 558 | 10.495 | 24.669 | -28.862 | 1.00 | 0.00 | B | N |
| ATOM | 8305 | CA  | GLY A 558 | 11.227 | 25.026 | -30.042 | 1.00 | 0.00 | B | C |
| ATOM | 8306 | C   | GLY A 558 | 12.347 | 24.045 | -30.229 | 1.00 | 0.00 | B | C |
| ATOM | 8307 | O   | GLY A 558 | 13.142 | 24.178 | -31.158 | 1.00 | 0.00 | B | O |
| ATOM | 8308 | N   | PHE A 559 | 12.452 | 23.032 | -29.345 | 1.00 | 0.00 | B | N |
| ATOM | 8309 | CA  | PHE A 559 | 13.486 | 22.043 | -29.495 | 1.00 | 0.00 | B | C |
| ATOM | 8310 | CB  | PHE A 559 | 14.316 | 21.853 | -28.213 | 1.00 | 0.00 | B | C |
| ATOM | 8311 | CG  | PHE A 559 | 15.104 | 23.116 | -28.094 | 1.00 | 0.00 | B | C |
| ATOM | 8312 | CD1 | PHE A 559 | 14.509 | 24.264 | -27.628 | 1.00 | 0.00 | B | C |
| ATOM | 8313 | CE1 | PHE A 559 | 15.202 | 25.444 | -27.521 | 1.00 | 0.00 | B | C |
| ATOM | 8314 | CZ  | PHE A 559 | 16.521 | 25.482 | -27.899 | 1.00 | 0.00 | B | C |
| ATOM | 8315 | CD2 | PHE A 559 | 16.421 | 23.172 | -28.488 | 1.00 | 0.00 | B | C |
| ATOM | 8316 | CE2 | PHE A 559 | 17.129 | 24.347 | -28.384 | 1.00 | 0.00 | B | C |
| ATOM | 8317 | C   | PHE A 559 | 12.812 | 20.783 | -29.907 | 1.00 | 0.00 | B | C |
| ATOM | 8318 | O   | PHE A 559 | 11.719 | 20.489 | -29.453 | 1.00 | 0.00 | B | O |
| ATOM | 8319 | N   | GLN A 560 | 13.401 | 20.000 | -30.819 | 1.00 | 0.00 | B | N |
| ATOM | 8320 | CA  | GLN A 560 | 12.692 | 18.877 | -31.360 | 1.00 | 0.00 | B | C |
| ATOM | 8321 | CB  | GLN A 560 | 13.518 | 18.124 | -32.417 | 1.00 | 0.00 | B | C |
| ATOM | 8322 | CG  | GLN A 560 | 13.858 | 18.929 | -33.673 | 1.00 | 0.00 | B | C |
| ATOM | 8323 | CD  | GLN A 560 | 15.108 | 19.774 | -33.448 | 1.00 | 0.00 | B | C |
| ATOM | 8324 | OE1 | GLN A 560 | 15.527 | 20.073 | -32.333 | 1.00 | 0.00 | B | O |
| ATOM | 8325 | NE2 | GLN A 560 | 15.739 | 20.177 | -34.584 | 1.00 | 0.00 | B | N |
| ATOM | 8326 | C   | GLN A 560 | 12.372 | 17.875 | -30.297 | 1.00 | 0.00 | B | C |
| ATOM | 8327 | O   | GLN A 560 | 11.243 | 17.402 | -30.200 | 1.00 | 0.00 | B | O |
| ATOM | 8328 | N   | GLN A 561 | 13.364 | 17.500 | -29.475 | 1.00 | 0.00 | B | N |
| ATOM | 8329 | CA  | GLN A 561 | 13.087 | 16.513 | -28.472 | 1.00 | 0.00 | B | C |
| ATOM | 8330 | CB  | GLN A 561 | 14.347 | 16.107 | -27.687 | 1.00 | 0.00 | B | C |
| ATOM | 8331 | CG  | GLN A 561 | 15.383 | 15.308 | -28.484 | 1.00 | 0.00 | B | C |
| ATOM | 8332 | CD  | GLN A 561 | 15.041 | 13.833 | -28.328 | 1.00 | 0.00 | B | C |
| ATOM | 8333 | OE1 | GLN A 561 | 13.900 | 13.484 | -28.029 | 1.00 | 0.00 | B | O |
| ATOM | 8334 | NE2 | GLN A 561 | 16.054 | 12.946 | -28.521 | 1.00 | 0.00 | B | N |
| ATOM | 8335 | C   | GLN A 561 | 12.145 | 17.090 | -27.461 | 1.00 | 0.00 | B | C |
| ATOM | 8336 | O   | GLN A 561 | 11.127 | 16.492 | -27.117 | 1.00 | 0.00 | B | O |
| ATOM | 8337 | N   | MET A 562 | 12.480 | 18.299 | -26.978 | 1.00 | 0.00 | B | N |
| ATOM | 8338 | CA  | MET A 562 | 11.799 | 18.948 | -25.897 | 1.00 | 0.00 | B | C |
| ATOM | 8339 | CB  | MET A 562 | 12.547 | 20.210 | -25.476 | 1.00 | 0.00 | B | C |
| ATOM | 8340 | CG  | MET A 562 | 14.020 | 19.929 | -25.191 | 1.00 | 0.00 | B | C |



|      |      |     |           |        |        |         |      |      |   |   |
|------|------|-----|-----------|--------|--------|---------|------|------|---|---|
| ATOM | 8341 | SD  | MET A 562 | 14.301 | 18.524 | -24.075 | 1.00 | 0.00 | B | S |
| ATOM | 8342 | CE  | MET A 562 | 13.464 | 19.274 | -22.647 | 1.00 | 0.00 | B | C |
| ATOM | 8343 | C   | MET A 562 | 10.410 | 19.366 | -26.253 | 1.00 | 0.00 | B | C |
| ATOM | 8344 | O   | MET A 562 | 9.463  | 19.188 | -25.494 | 1.00 | 0.00 | B | O |
| ATOM | 8345 | N   | GLY A 563 | 10.276 | 19.926 | -27.453 | 1.00 | 0.00 | B | N |
| ATOM | 8346 | CA  | GLY A 563 | 9.091  | 20.510 | -27.994 | 1.00 | 0.00 | B | C |
| ATOM | 8347 | C   | GLY A 563 | 8.059  | 19.450 | -28.062 | 1.00 | 0.00 | B | C |
| ATOM | 8348 | O   | GLY A 563 | 6.881  | 19.698 | -27.819 | 1.00 | 0.00 | B | O |
| ATOM | 8349 | N   | ILE A 564 | 8.476  | 18.226 | -28.416 | 1.00 | 0.00 | B | N |
| ATOM | 8350 | CA  | ILE A 564 | 7.505  | 17.189 | -28.551 | 1.00 | 0.00 | B | C |
| ATOM | 8351 | CB  | ILE A 564 | 8.068  | 15.922 | -29.105 | 1.00 | 0.00 | B | C |
| ATOM | 8352 | CG2 | ILE A 564 | 6.930  | 14.895 | -29.219 | 1.00 | 0.00 | B | C |
| ATOM | 8353 | CG1 | ILE A 564 | 8.772  | 16.250 | -30.429 | 1.00 | 0.00 | B | C |
| ATOM | 8354 | CD  | ILE A 564 | 8.011  | 17.266 | -31.282 | 1.00 | 0.00 | B | C |
| ATOM | 8355 | C   | ILE A 564 | 6.883  | 16.905 | -27.217 | 1.00 | 0.00 | B | C |
| ATOM | 8356 | O   | ILE A 564 | 5.671  | 16.729 | -27.121 | 1.00 | 0.00 | B | O |
| ATOM | 8357 | N   | TYR A 565 | 7.693  | 16.861 | -26.146 | 1.00 | 0.00 | B | N |
| ATOM | 8358 | CA  | TYR A 565 | 7.171  | 16.519 | -24.853 | 1.00 | 0.00 | B | C |
| ATOM | 8359 | CB  | TYR A 565 | 8.283  | 16.294 | -23.816 | 1.00 | 0.00 | B | C |
| ATOM | 8360 | CG  | TYR A 565 | 8.881  | 14.985 | -24.204 | 1.00 | 0.00 | B | C |
| ATOM | 8361 | CD1 | TYR A 565 | 9.887  | 14.910 | -25.138 | 1.00 | 0.00 | B | C |
| ATOM | 8362 | CE1 | TYR A 565 | 10.419 | 13.694 | -25.493 | 1.00 | 0.00 | B | C |
| ATOM | 8363 | CZ  | TYR A 565 | 9.944  | 12.537 | -24.921 | 1.00 | 0.00 | B | C |
| ATOM | 8364 | OH  | TYR A 565 | 10.492 | 11.290 | -25.287 | 1.00 | 0.00 | B | O |
| ATOM | 8365 | CD2 | TYR A 565 | 8.404  | 13.820 | -23.643 | 1.00 | 0.00 | B | C |
| ATOM | 8366 | CE2 | TYR A 565 | 8.931  | 12.601 | -23.994 | 1.00 | 0.00 | B | C |
| ATOM | 8367 | C   | TYR A 565 | 6.194  | 17.538 | -24.353 | 1.00 | 0.00 | B | C |
| ATOM | 8368 | O   | TYR A 565 | 5.145  | 17.177 | -23.819 | 1.00 | 0.00 | B | O |
| ATOM | 8369 | N   | ALA A 566 | 6.491  | 18.839 | -24.514 | 1.00 | 0.00 | B | N |
| ATOM | 8370 | CA  | ALA A 566 | 5.591  | 19.838 | -24.007 | 1.00 | 0.00 | B | C |
| ATOM | 8371 | CB  | ALA A 566 | 6.080  | 21.274 | -24.249 | 1.00 | 0.00 | B | C |
| ATOM | 8372 | C   | ALA A 566 | 4.280  | 19.702 | -24.710 | 1.00 | 0.00 | B | C |
| ATOM | 8373 | O   | ALA A 566 | 3.221  | 19.778 | -24.093 | 1.00 | 0.00 | B | O |
| ATOM | 8374 | N   | VAL A 567 | 4.335  | 19.481 | -26.035 | 1.00 | 0.00 | B | N |
| ATOM | 8375 | CA  | VAL A 567 | 3.144  | 19.405 | -26.826 | 1.00 | 0.00 | B | C |
| ATOM | 8376 | CB  | VAL A 567 | 3.431  | 19.217 | -28.288 | 1.00 | 0.00 | B | C |
| ATOM | 8377 | CG1 | VAL A 567 | 2.094  | 19.088 | -29.037 | 1.00 | 0.00 | B | C |
| ATOM | 8378 | CG2 | VAL A 567 | 4.299  | 20.392 | -28.769 | 1.00 | 0.00 | B | C |

|      |      |     |           |        |        |         |      |      |   |   |
|------|------|-----|-----------|--------|--------|---------|------|------|---|---|
| ATOM | 8379 | C   | VAL A 567 | 2.319  | 18.248 | -26.354 | 1.00 | 0.00 | B | C |
| ATOM | 8380 | O   | VAL A 567 | 1.101  | 18.361 | -26.221 | 1.00 | 0.00 | B | O |
| ATOM | 8381 | N   | MET A 568 | 2.957  | 17.098 | -26.072 | 1.00 | 0.00 | B | N |
| ATOM | 8382 | CA  | MET A 568 | 2.193  | 15.949 | -25.682 | 1.00 | 0.00 | B | C |
| ATOM | 8383 | CB  | MET A 568 | 3.020  | 14.658 | -25.568 | 1.00 | 0.00 | B | C |
| ATOM | 8384 | CG  | MET A 568 | 4.096  | 14.677 | -24.486 | 1.00 | 0.00 | B | C |
| ATOM | 8385 | SD  | MET A 568 | 4.985  | 13.101 | -24.324 | 1.00 | 0.00 | B | S |
| ATOM | 8386 | CE  | MET A 568 | 5.673  | 13.147 | -26.005 | 1.00 | 0.00 | B | C |
| ATOM | 8387 | C   | MET A 568 | 1.525  | 16.218 | -24.372 | 1.00 | 0.00 | B | C |
| ATOM | 8388 | O   | MET A 568 | 0.378  | 15.829 | -24.161 | 1.00 | 0.00 | B | O |
| ATOM | 8389 | N   | ILE A 569 | 2.231  | 16.906 | -23.458 | 1.00 | 0.00 | B | N |
| ATOM | 8390 | CA  | ILE A 569 | 1.686  | 17.197 | -22.165 | 1.00 | 0.00 | B | C |
| ATOM | 8391 | CB  | ILE A 569 | 2.644  | 17.955 | -21.297 | 1.00 | 0.00 | B | C |
| ATOM | 8392 | CG2 | ILE A 569 | 1.853  | 18.558 | -20.134 | 1.00 | 0.00 | B | C |
| ATOM | 8393 | CG1 | ILE A 569 | 3.823  | 17.067 | -20.877 | 1.00 | 0.00 | B | C |
| ATOM | 8394 | CD  | ILE A 569 | 4.952  | 17.844 | -20.202 | 1.00 | 0.00 | B | C |
| ATOM | 8395 | C   | ILE A 569 | 0.478  | 18.057 | -22.325 | 1.00 | 0.00 | B | C |
| ATOM | 8396 | O   | ILE A 569 | -0.553 | 17.816 | -21.702 | 1.00 | 0.00 | B | O |
| ATOM | 8397 | N   | GLU A 570 | 0.568  | 19.084 | -23.180 | 1.00 | 0.00 | B | N |
| ATOM | 8398 | CA  | GLU A 570 | -0.549 | 19.964 | -23.333 | 1.00 | 0.00 | B | C |
| ATOM | 8399 | CB  | GLU A 570 | -0.224 | 21.192 | -24.178 | 1.00 | 0.00 | B | C |
| ATOM | 8400 | CG  | GLU A 570 | 0.606  | 22.170 | -23.355 | 1.00 | 0.00 | B | C |
| ATOM | 8401 | CD  | GLU A 570 | 1.317  | 23.081 | -24.321 | 1.00 | 0.00 | B | C |
| ATOM | 8402 | OE1 | GLU A 570 | 0.697  | 24.075 | -24.779 | 1.00 | 0.00 | B | O |
| ATOM | 8403 | OE2 | GLU A 570 | 2.504  | 22.783 | -24.617 | 1.00 | 0.00 | B | O |
| ATOM | 8404 | C   | GLU A 570 | -1.697 | 19.211 | -23.914 | 1.00 | 0.00 | B | C |
| ATOM | 8405 | O   | GLU A 570 | -2.843 | 19.458 | -23.550 | 1.00 | 0.00 | B | O |
| ATOM | 8406 | N   | LYS A 571 | -1.418 | 18.264 | -24.826 | 1.00 | 0.00 | B | N |
| ATOM | 8407 | CA  | LYS A 571 | -2.459 | 17.503 | -25.457 | 1.00 | 0.00 | B | C |
| ATOM | 8408 | CB  | LYS A 571 | -1.922 | 16.476 | -26.467 | 1.00 | 0.00 | B | C |
| ATOM | 8409 | CG  | LYS A 571 | -3.018 | 15.581 | -27.057 | 1.00 | 0.00 | B | C |
| ATOM | 8410 | CD  | LYS A 571 | -3.995 | 16.295 | -27.993 | 1.00 | 0.00 | B | C |
| ATOM | 8411 | CE  | LYS A 571 | -5.105 | 15.378 | -28.515 | 1.00 | 0.00 | B | C |
| ATOM | 8412 | NZ  | LYS A 571 | -5.665 | 15.918 | -29.770 | 1.00 | 0.00 | B | N |
| ATOM | 8413 | C   | LYS A 571 | -3.208 | 16.710 | -24.436 | 1.00 | 0.00 | B | C |
| ATOM | 8414 | O   | LYS A 571 | -4.432 | 16.614 | -24.484 | 1.00 | 0.00 | B | O |
| ATOM | 8415 | N   | MET A 572 | -2.494 | 16.096 | -23.483 | 1.00 | 0.00 | B | N |
| ATOM | 8416 | CA  | MET A 572 | -3.186 | 15.262 | -22.550 | 1.00 | 0.00 | B | C |

|      |      |     |           |        |        |         |      |      |   |   |
|------|------|-----|-----------|--------|--------|---------|------|------|---|---|
| ATOM | 8417 | CB  | MET A 572 | -2.215 | 14.480 | -21.654 | 1.00 | 0.00 | B | C |
| ATOM | 8418 | CG  | MET A 572 | -1.360 | 13.544 | -22.510 | 1.00 | 0.00 | B | C |
| ATOM | 8419 | SD  | MET A 572 | -0.179 | 12.482 | -21.636 | 1.00 | 0.00 | B | S |
| ATOM | 8420 | CE  | MET A 572 | 0.443  | 11.775 | -23.188 | 1.00 | 0.00 | B | C |
| ATOM | 8421 | C   | MET A 572 | -4.111 | 16.083 | -21.714 | 1.00 | 0.00 | B | C |
| ATOM | 8422 | O   | MET A 572 | -5.249 | 15.680 | -21.458 | 1.00 | 0.00 | B | O |
| ATOM | 8423 | N   | ILE A 573 | -3.646 | 17.254 | -21.261 | 1.00 | 0.00 | B | N |
| ATOM | 8424 | CA  | ILE A 573 | -4.400 | 18.119 | -20.401 | 1.00 | 0.00 | B | C |
| ATOM | 8425 | CB  | ILE A 573 | -3.538 | 19.218 | -19.854 | 1.00 | 0.00 | B | C |
| ATOM | 8426 | CG2 | ILE A 573 | -4.403 | 20.109 | -18.947 | 1.00 | 0.00 | B | C |
| ATOM | 8427 | CG1 | ILE A 573 | -2.333 | 18.597 | -19.122 | 1.00 | 0.00 | B | C |
| ATOM | 8428 | CD  | ILE A 573 | -1.217 | 19.588 | -18.803 | 1.00 | 0.00 | B | C |
| ATOM | 8429 | C   | ILE A 573 | -5.556 | 18.724 | -21.130 | 1.00 | 0.00 | B | C |
| ATOM | 8430 | O   | ILE A 573 | -6.664 | 18.788 | -20.601 | 1.00 | 0.00 | B | O |
| ATOM | 8431 | N   | LEU A 574 | -5.343 | 19.228 | -22.357 | 1.00 | 0.00 | B | N |
| ATOM | 8432 | CA  | LEU A 574 | -6.466 | 19.843 | -22.989 | 1.00 | 0.00 | B | C |
| ATOM | 8433 | CB  | LEU A 574 | -6.063 | 20.498 | -24.318 | 1.00 | 0.00 | B | C |
| ATOM | 8434 | CG  | LEU A 574 | -4.884 | 21.476 | -24.142 | 1.00 | 0.00 | B | C |
| ATOM | 8435 | CD1 | LEU A 574 | -4.545 | 22.199 | -25.451 | 1.00 | 0.00 | B | C |
| ATOM | 8436 | CD2 | LEU A 574 | -5.105 | 22.433 | -22.960 | 1.00 | 0.00 | B | C |
| ATOM | 8437 | C   | LEU A 574 | -7.511 | 18.798 | -23.275 | 1.00 | 0.00 | B | C |
| ATOM | 8438 | O   | LEU A 574 | -8.638 | 18.897 | -22.793 | 1.00 | 0.00 | B | O |
| ATOM | 8439 | N   | ARG A 575 | -7.166 | 17.785 | -24.102 | 1.00 | 0.00 | B | N |
| ATOM | 8440 | CA  | ARG A 575 | -8.124 | 16.788 | -24.516 | 1.00 | 0.00 | B | C |
| ATOM | 8441 | CB  | ARG A 575 | -7.668 | 16.137 | -25.826 | 1.00 | 0.00 | B | C |
| ATOM | 8442 | CG  | ARG A 575 | -7.310 | 17.170 | -26.893 | 1.00 | 0.00 | B | C |
| ATOM | 8443 | CD  | ARG A 575 | -8.503 | 18.005 | -27.352 | 1.00 | 0.00 | B | C |
| ATOM | 8444 | NE  | ARG A 575 | -8.011 | 18.938 | -28.405 | 1.00 | 0.00 | B | N |
| ATOM | 8445 | CZ  | ARG A 575 | -7.877 | 18.499 | -29.691 | 1.00 | 0.00 | B | C |
| ATOM | 8446 | NH1 | ARG A 575 | -8.177 | 17.207 | -30.010 | 1.00 | 0.00 | B | N |
| ATOM | 8447 | NH2 | ARG A 575 | -7.437 | 19.351 | -30.665 | 1.00 | 0.00 | B | N |
| ATOM | 8448 | C   | ARG A 575 | -8.438 | 15.649 | -23.578 | 1.00 | 0.00 | B | C |
| ATOM | 8449 | O   | ARG A 575 | -9.522 | 15.571 | -23.002 | 1.00 | 0.00 | B | O |
| ATOM | 8450 | N   | ASP A 576 | -7.436 | 14.762 | -23.362 | 1.00 | 0.00 | B | N |
| ATOM | 8451 | CA  | ASP A 576 | -7.642 | 13.466 | -22.757 | 1.00 | 0.00 | B | C |
| ATOM | 8452 | CB  | ASP A 576 | -6.386 | 12.581 | -22.882 | 1.00 | 0.00 | B | C |
| ATOM | 8453 | CG  | ASP A 576 | -6.772 | 11.122 | -22.688 | 1.00 | 0.00 | B | C |
| ATOM | 8454 | OD1 | ASP A 576 | -7.697 | 10.846 | -21.880 | 1.00 | 0.00 | B | O |

|      |      |               |         |        |         |      |      |   |   |
|------|------|---------------|---------|--------|---------|------|------|---|---|
| ATOM | 8455 | OD2 ASP A 576 | -6.138  | 10.257 | -23.354 | 1.00 | 0.00 | B | O |
| ATOM | 8456 | C ASP A 576   | -8.022  | 13.536 | -21.313 | 1.00 | 0.00 | B | C |
| ATOM | 8457 | O ASP A 576   | -9.007  | 12.932 | -20.888 | 1.00 | 0.00 | B | O |
| ATOM | 8458 | N LEU A 577   | -7.239  | 14.280 | -20.519 | 1.00 | 0.00 | B | N |
| ATOM | 8459 | CA LEU A 577  | -7.488  | 14.394 | -19.116 | 1.00 | 0.00 | B | C |
| ATOM | 8460 | CB LEU A 577  | -6.428  | 15.236 | -18.392 | 1.00 | 0.00 | B | C |
| ATOM | 8461 | CG LEU A 577  | -6.824  | 15.559 | -16.944 | 1.00 | 0.00 | B | C |
| ATOM | 8462 | CD1 LEU A 577 | -7.052  | 14.281 | -16.124 | 1.00 | 0.00 | B | C |
| ATOM | 8463 | CD2 LEU A 577 | -5.820  | 16.519 | -16.292 | 1.00 | 0.00 | B | C |
| ATOM | 8464 | C LEU A 577   | -8.786  | 15.091 | -18.923 | 1.00 | 0.00 | B | C |
| ATOM | 8465 | O LEU A 577   | -9.608  | 14.685 | -18.105 | 1.00 | 0.00 | B | O |
| ATOM | 8466 | N CYS A 578   | -9.004  | 16.160 | -19.703 | 1.00 | 0.00 | B | N |
| ATOM | 8467 | CA CYS A 578  | -10.180 | 16.957 | -19.538 | 1.00 | 0.00 | B | C |
| ATOM | 8468 | CB CYS A 578  | -10.218 | 18.154 | -20.501 | 1.00 | 0.00 | B | C |
| ATOM | 8469 | SG CYS A 578  | -11.708 | 19.173 | -20.298 | 1.00 | 0.00 | B | S |
| ATOM | 8470 | C CYS A 578   | -11.381 | 16.115 | -19.813 | 1.00 | 0.00 | B | C |
| ATOM | 8471 | O CYS A 578   | -12.357 | 16.158 | -19.069 | 1.00 | 0.00 | B | O |
| ATOM | 8472 | N ARG A 579   | -11.343 | 15.320 | -20.895 | 1.00 | 0.00 | B | N |
| ATOM | 8473 | CA ARG A 579  | -12.483 | 14.528 | -21.239 | 1.00 | 0.00 | B | C |
| ATOM | 8474 | CB ARG A 579  | -12.296 | 13.781 | -22.570 | 1.00 | 0.00 | B | C |
| ATOM | 8475 | CG ARG A 579  | -12.308 | 14.699 | -23.794 | 1.00 | 0.00 | B | C |
| ATOM | 8476 | CD ARG A 579  | -11.780 | 14.028 | -25.061 | 1.00 | 0.00 | B | C |
| ATOM | 8477 | NE ARG A 579  | -12.055 | 14.939 | -26.211 | 1.00 | 0.00 | B | N |
| ATOM | 8478 | CZ ARG A 579  | -11.159 | 15.045 | -27.232 | 1.00 | 0.00 | B | C |
| ATOM | 8479 | NH1 ARG A 579 | -9.977  | 14.365 | -27.174 | 1.00 | 0.00 | B | N |
| ATOM | 8480 | NH2 ARG A 579 | -11.435 | 15.842 | -28.308 | 1.00 | 0.00 | B | N |
| ATOM | 8481 | C ARG A 579   | -12.733 | 13.508 | -20.171 | 1.00 | 0.00 | B | C |
| ATOM | 8482 | O ARG A 579   | -13.870 | 13.307 | -19.750 | 1.00 | 0.00 | B | O |
| ATOM | 8483 | N PHE A 580   | -11.660 | 12.850 | -19.689 | 1.00 | 0.00 | B | N |
| ATOM | 8484 | CA PHE A 580  | -11.766 | 11.783 | -18.733 | 1.00 | 0.00 | B | C |
| ATOM | 8485 | CB PHE A 580  | -10.419 | 11.093 | -18.464 | 1.00 | 0.00 | B | C |
| ATOM | 8486 | CG PHE A 580  | -10.731 | 9.822  | -17.759 | 1.00 | 0.00 | B | C |
| ATOM | 8487 | CD1 PHE A 580 | -11.122 | 8.722  | -18.487 | 1.00 | 0.00 | B | C |
| ATOM | 8488 | CE1 PHE A 580 | -11.416 | 7.537  | -17.857 | 1.00 | 0.00 | B | C |
| ATOM | 8489 | CZ PHE A 580  | -11.316 | 7.456  | -16.490 | 1.00 | 0.00 | B | C |
| ATOM | 8490 | CD2 PHE A 580 | -10.636 | 9.727  | -16.390 | 1.00 | 0.00 | B | C |
| ATOM | 8491 | CE2 PHE A 580 | -10.927 | 8.545  | -15.754 | 1.00 | 0.00 | B | C |
| ATOM | 8492 | C PHE A 580   | -12.271 | 12.300 | -17.429 | 1.00 | 0.00 | B | C |

|      |      |     |           |         |        |         |      |      |   |   |
|------|------|-----|-----------|---------|--------|---------|------|------|---|---|
| ATOM | 8493 | O   | PHE A 580 | -13.094 | 11.661 | -16.780 | 1.00 | 0.00 | B | O |
| ATOM | 8494 | N   | MET A 581 | -11.808 | 13.489 | -17.014 | 1.00 | 0.00 | B | N |
| ATOM | 8495 | CA  | MET A 581 | -12.186 | 13.978 | -15.726 | 1.00 | 0.00 | B | C |
| ATOM | 8496 | CB  | MET A 581 | -11.583 | 15.338 | -15.365 | 1.00 | 0.00 | B | C |
| ATOM | 8497 | CG  | MET A 581 | -12.210 | 15.888 | -14.087 | 1.00 | 0.00 | B | C |
| ATOM | 8498 | SD  | MET A 581 | -11.230 | 17.138 | -13.225 | 1.00 | 0.00 | B | S |
| ATOM | 8499 | CE  | MET A 581 | -10.330 | 15.928 | -12.211 | 1.00 | 0.00 | B | C |
| ATOM | 8500 | C   | MET A 581 | -13.668 | 14.101 | -15.681 | 1.00 | 0.00 | B | C |
| ATOM | 8501 | O   | MET A 581 | -14.277 | 13.858 | -14.641 | 1.00 | 0.00 | B | O |
| ATOM | 8502 | N   | PHE A 582 | -14.304 | 14.487 | -16.797 | 1.00 | 0.00 | B | N |
| ATOM | 8503 | CA  | PHE A 582 | -15.731 | 14.571 | -16.735 | 1.00 | 0.00 | B | C |
| ATOM | 8504 | CB  | PHE A 582 | -16.386 | 15.012 | -18.057 | 1.00 | 0.00 | B | C |
| ATOM | 8505 | CG  | PHE A 582 | -16.123 | 16.464 | -18.264 | 1.00 | 0.00 | B | C |
| ATOM | 8506 | CD1 | PHE A 582 | -16.743 | 17.395 | -17.461 | 1.00 | 0.00 | B | C |
| ATOM | 8507 | CE1 | PHE A 582 | -16.520 | 18.739 | -17.637 | 1.00 | 0.00 | B | C |
| ATOM | 8508 | CZ  | PHE A 582 | -15.674 | 19.167 | -18.634 | 1.00 | 0.00 | B | C |
| ATOM | 8509 | CD2 | PHE A 582 | -15.286 | 16.901 | -19.265 | 1.00 | 0.00 | B | C |
| ATOM | 8510 | CE2 | PHE A 582 | -15.060 | 18.246 | -19.447 | 1.00 | 0.00 | B | C |
| ATOM | 8511 | C   | PHE A 582 | -16.276 | 13.214 | -16.405 | 1.00 | 0.00 | B | C |
| ATOM | 8512 | O   | PHE A 582 | -17.122 | 13.081 | -15.522 | 1.00 | 0.00 | B | O |
| ATOM | 8513 | N   | VAL A 583 | -15.799 | 12.167 | -17.107 | 1.00 | 0.00 | B | N |
| ATOM | 8514 | CA  | VAL A 583 | -16.284 | 10.825 | -16.925 | 1.00 | 0.00 | B | C |
| ATOM | 8515 | CB  | VAL A 583 | -15.672 | 9.870  | -17.909 | 1.00 | 0.00 | B | C |
| ATOM | 8516 | CG1 | VAL A 583 | -16.192 | 8.454  | -17.607 | 1.00 | 0.00 | B | C |
| ATOM | 8517 | CG2 | VAL A 583 | -15.971 | 10.366 | -19.333 | 1.00 | 0.00 | B | C |
| ATOM | 8518 | C   | VAL A 583 | -15.950 | 10.298 | -15.556 | 1.00 | 0.00 | B | C |
| ATOM | 8519 | O   | VAL A 583 | -16.808 | 9.745  | -14.874 | 1.00 | 0.00 | B | O |
| ATOM | 8520 | N   | TYR A 584 | -14.690 | 10.452 | -15.112 | 1.00 | 0.00 | B | N |
| ATOM | 8521 | CA  | TYR A 584 | -14.283 | 9.925  | -13.842 | 1.00 | 0.00 | B | C |
| ATOM | 8522 | CB  | TYR A 584 | -12.779 | 10.097 | -13.552 | 1.00 | 0.00 | B | C |
| ATOM | 8523 | CG  | TYR A 584 | -12.541 | 9.718  | -12.129 | 1.00 | 0.00 | B | C |
| ATOM | 8524 | CD1 | TYR A 584 | -12.744 | 8.429  | -11.689 | 1.00 | 0.00 | B | C |
| ATOM | 8525 | CE1 | TYR A 584 | -12.520 | 8.090  | -10.373 | 1.00 | 0.00 | B | C |
| ATOM | 8526 | CZ  | TYR A 584 | -12.077 | 9.045  | -9.487  | 1.00 | 0.00 | B | C |
| ATOM | 8527 | OH  | TYR A 584 | -11.842 | 8.727  | -8.134  | 1.00 | 0.00 | B | O |
| ATOM | 8528 | CD2 | TYR A 584 | -12.079 | 10.657 | -11.234 | 1.00 | 0.00 | B | C |
| ATOM | 8529 | CE2 | TYR A 584 | -11.853 | 10.326 | -9.920  | 1.00 | 0.00 | B | C |
| ATOM | 8530 | C   | TYR A 584 | -15.058 | 10.614 | -12.779 | 1.00 | 0.00 | B | C |

|      |      |     |           |         |        |         |      |      |   |   |
|------|------|-----|-----------|---------|--------|---------|------|------|---|---|
| ATOM | 8531 | O   | TYR A 584 | -15.512 | 9.991  | -11.822 | 1.00 | 0.00 | B | O |
| ATOM | 8532 | N   | ILE A 585 | -15.235 | 11.938 | -12.924 | 1.00 | 0.00 | B | N |
| ATOM | 8533 | CA  | ILE A 585 | -15.978 | 12.660 | -11.942 | 1.00 | 0.00 | B | C |
| ATOM | 8534 | CB  | ILE A 585 | -15.961 | 14.146 | -12.141 | 1.00 | 0.00 | B | C |
| ATOM | 8535 | CG2 | ILE A 585 | -17.254 | 14.733 | -11.556 | 1.00 | 0.00 | B | C |
| ATOM | 8536 | CG1 | ILE A 585 | -14.675 | 14.722 | -11.519 | 1.00 | 0.00 | B | C |
| ATOM | 8537 | CD  | ILE A 585 | -13.390 | 14.108 | -12.061 | 1.00 | 0.00 | B | C |
| ATOM | 8538 | C   | ILE A 585 | -17.387 | 12.169 | -11.884 | 1.00 | 0.00 | B | C |
| ATOM | 8539 | O   | ILE A 585 | -17.928 | 12.010 | -10.792 | 1.00 | 0.00 | B | O |
| ATOM | 8540 | N   | VAL A 586 | -18.033 | 11.913 | -13.037 | 1.00 | 0.00 | B | N |
| ATOM | 8541 | CA  | VAL A 586 | -19.396 | 11.477 | -12.957 | 1.00 | 0.00 | B | C |
| ATOM | 8542 | CB  | VAL A 586 | -20.091 | 11.376 | -14.289 | 1.00 | 0.00 | B | C |
| ATOM | 8543 | CG1 | VAL A 586 | -19.490 | 10.228 | -15.116 | 1.00 | 0.00 | B | C |
| ATOM | 8544 | CG2 | VAL A 586 | -21.597 | 11.214 | -14.029 | 1.00 | 0.00 | B | C |
| ATOM | 8545 | C   | VAL A 586 | -19.466 | 10.148 | -12.267 | 1.00 | 0.00 | B | C |
| ATOM | 8546 | O   | VAL A 586 | -20.289 | 9.958  | -11.374 | 1.00 | 0.00 | B | O |
| ATOM | 8547 | N   | PHE A 587 | -18.596 | 9.188  | -12.644 | 1.00 | 0.00 | B | N |
| ATOM | 8548 | CA  | PHE A 587 | -18.645 | 7.894  | -12.022 | 1.00 | 0.00 | B | C |
| ATOM | 8549 | CB  | PHE A 587 | -17.728 | 6.842  | -12.676 | 1.00 | 0.00 | B | C |
| ATOM | 8550 | CG  | PHE A 587 | -18.448 | 6.279  | -13.857 | 1.00 | 0.00 | B | C |
| ATOM | 8551 | CD1 | PHE A 587 | -19.302 | 5.210  | -13.697 | 1.00 | 0.00 | B | C |
| ATOM | 8552 | CE1 | PHE A 587 | -19.978 | 4.674  | -14.769 | 1.00 | 0.00 | B | C |
| ATOM | 8553 | CZ  | PHE A 587 | -19.804 | 5.207  | -16.023 | 1.00 | 0.00 | B | C |
| ATOM | 8554 | CD2 | PHE A 587 | -18.280 | 6.806  | -15.117 | 1.00 | 0.00 | B | C |
| ATOM | 8555 | CE2 | PHE A 587 | -18.953 | 6.271  | -16.194 | 1.00 | 0.00 | B | C |
| ATOM | 8556 | C   | PHE A 587 | -18.292 | 8.004  | -10.573 | 1.00 | 0.00 | B | C |
| ATOM | 8557 | O   | PHE A 587 | -18.963 | 7.422  | -9.722  | 1.00 | 0.00 | B | O |
| ATOM | 8558 | N   | LEU A 588 | -17.231 | 8.765  | -10.248 | 1.00 | 0.00 | B | N |
| ATOM | 8559 | CA  | LEU A 588 | -16.809 | 8.859  | -8.881  | 1.00 | 0.00 | B | C |
| ATOM | 8560 | CB  | LEU A 588 | -15.523 | 9.700  | -8.709  | 1.00 | 0.00 | B | C |
| ATOM | 8561 | CG  | LEU A 588 | -15.688 | 11.240 | -8.773  | 1.00 | 0.00 | B | C |
| ATOM | 8562 | CD1 | LEU A 588 | -16.223 | 11.830 | -7.455  | 1.00 | 0.00 | B | C |
| ATOM | 8563 | CD2 | LEU A 588 | -14.395 | 11.932 | -9.224  | 1.00 | 0.00 | B | C |
| ATOM | 8564 | C   | LEU A 588 | -17.895 | 9.500  | -8.079  | 1.00 | 0.00 | B | C |
| ATOM | 8565 | O   | LEU A 588 | -18.244 | 9.034  | -6.996  | 1.00 | 0.00 | B | O |
| ATOM | 8566 | N   | PHE A 589 | -18.479 | 10.585 | -8.613  | 1.00 | 0.00 | B | N |
| ATOM | 8567 | CA  | PHE A 589 | -19.435 | 11.330 | -7.855  | 1.00 | 0.00 | B | C |
| ATOM | 8568 | CB  | PHE A 589 | -19.892 | 12.616 | -8.559  | 1.00 | 0.00 | B | C |

|      |      |     |           |         |        |         |      |      |   |   |
|------|------|-----|-----------|---------|--------|---------|------|------|---|---|
| ATOM | 8569 | CG  | PHE A 589 | -20.705 | 13.385 | -7.576  | 1.00 | 0.00 | B | C |
| ATOM | 8570 | CD1 | PHE A 589 | -20.099 | 14.284 | -6.730  | 1.00 | 0.00 | B | C |
| ATOM | 8571 | CE1 | PHE A 589 | -20.837 | 14.997 | -5.816  | 1.00 | 0.00 | B | C |
| ATOM | 8572 | CZ  | PHE A 589 | -22.197 | 14.810 | -5.742  | 1.00 | 0.00 | B | C |
| ATOM | 8573 | CD2 | PHE A 589 | -22.064 | 13.198 | -7.494  | 1.00 | 0.00 | B | C |
| ATOM | 8574 | CE2 | PHE A 589 | -22.809 | 13.910 | -6.582  | 1.00 | 0.00 | B | C |
| ATOM | 8575 | C   | PHE A 589 | -20.636 | 10.483 | -7.575  | 1.00 | 0.00 | B | C |
| ATOM | 8576 | O   | PHE A 589 | -21.129 | 10.454 | -6.448  | 1.00 | 0.00 | B | O |
| ATOM | 8577 | N   | GLY A 590 | -21.136 | 9.757  | -8.590  | 1.00 | 0.00 | B | N |
| ATOM | 8578 | CA  | GLY A 590 | -22.320 | 8.975  | -8.396  | 1.00 | 0.00 | B | C |
| ATOM | 8579 | C   | GLY A 590 | -22.055 | 7.917  | -7.370  | 1.00 | 0.00 | B | C |
| ATOM | 8580 | O   | GLY A 590 | -22.876 | 7.678  | -6.486  | 1.00 | 0.00 | B | O |
| ATOM | 8581 | N   | PHE A 591 | -20.890 | 7.251  | -7.453  | 1.00 | 0.00 | B | N |
| ATOM | 8582 | CA  | PHE A 591 | -20.602 | 6.202  | -6.523  | 1.00 | 0.00 | B | C |
| ATOM | 8583 | CB  | PHE A 591 | -19.319 | 5.418  | -6.838  | 1.00 | 0.00 | B | C |
| ATOM | 8584 | CG  | PHE A 591 | -19.683 | 4.394  | -7.858  | 1.00 | 0.00 | B | C |
| ATOM | 8585 | CD1 | PHE A 591 | -19.861 | 4.722  | -9.182  | 1.00 | 0.00 | B | C |
| ATOM | 8586 | CE1 | PHE A 591 | -20.189 | 3.756  | -10.104 | 1.00 | 0.00 | B | C |
| ATOM | 8587 | CZ  | PHE A 591 | -20.337 | 2.447  | -9.711  | 1.00 | 0.00 | B | C |
| ATOM | 8588 | CD2 | PHE A 591 | -19.827 | 3.080  | -7.475  | 1.00 | 0.00 | B | C |
| ATOM | 8589 | CE2 | PHE A 591 | -20.153 | 2.109  | -8.392  | 1.00 | 0.00 | B | C |
| ATOM | 8590 | C   | PHE A 591 | -20.506 | 6.762  | -5.143  | 1.00 | 0.00 | B | C |
| ATOM | 8591 | O   | PHE A 591 | -20.957 | 6.143  | -4.182  | 1.00 | 0.00 | B | O |
| ATOM | 8592 | N   | SER A 592 | -19.904 | 7.953  | -5.016  | 1.00 | 0.00 | B | N |
| ATOM | 8593 | CA  | SER A 592 | -19.744 | 8.593  | -3.747  | 1.00 | 0.00 | B | C |
| ATOM | 8594 | CB  | SER A 592 | -19.034 | 9.941  | -3.895  | 1.00 | 0.00 | B | C |
| ATOM | 8595 | OG  | SER A 592 | -18.963 | 10.575 | -2.634  | 1.00 | 0.00 | B | O |
| ATOM | 8596 | C   | SER A 592 | -21.094 | 8.859  | -3.153  | 1.00 | 0.00 | B | C |
| ATOM | 8597 | O   | SER A 592 | -21.314 | 8.626  | -1.965  | 1.00 | 0.00 | B | O |
| ATOM | 8598 | N   | THR A 593 | -22.042 | 9.351  | -3.970  | 1.00 | 0.00 | B | N |
| ATOM | 8599 | CA  | THR A 593 | -23.341 | 9.666  | -3.452  | 1.00 | 0.00 | B | C |
| ATOM | 8600 | CB  | THR A 593 | -24.261 | 10.285 | -4.462  | 1.00 | 0.00 | B | C |
| ATOM | 8601 | OG1 | THR A 593 | -24.553 | 9.371  | -5.507  | 1.00 | 0.00 | B | O |
| ATOM | 8602 | CG2 | THR A 593 | -23.569 | 11.532 | -5.020  | 1.00 | 0.00 | B | C |
| ATOM | 8603 | C   | THR A 593 | -23.979 | 8.403  | -2.981  | 1.00 | 0.00 | B | C |
| ATOM | 8604 | O   | THR A 593 | -24.630 | 8.382  | -1.939  | 1.00 | 0.00 | B | O |
| ATOM | 8605 | N   | ALA A 594 | -23.804 | 7.309  | -3.743  | 1.00 | 0.00 | B | N |
| ATOM | 8606 | CA  | ALA A 594 | -24.425 | 6.068  | -3.389  | 1.00 | 0.00 | B | C |

|      |      |     |           |         |        |        |      |      |   |   |
|------|------|-----|-----------|---------|--------|--------|------|------|---|---|
| ATOM | 8607 | CB  | ALA A 594 | -24.139 | 4.949  | -4.407 | 1.00 | 0.00 | B | C |
| ATOM | 8608 | C   | ALA A 594 | -23.899 | 5.616  | -2.061 | 1.00 | 0.00 | B | C |
| ATOM | 8609 | O   | ALA A 594 | -24.656 | 5.139  | -1.219 | 1.00 | 0.00 | B | O |
| ATOM | 8610 | N   | VAL A 595 | -22.578 | 5.750  | -1.838 | 1.00 | 0.00 | B | N |
| ATOM | 8611 | CA  | VAL A 595 | -21.985 | 5.304  | -0.609 | 1.00 | 0.00 | B | C |
| ATOM | 8612 | CB  | VAL A 595 | -20.483 | 5.407  | -0.591 | 1.00 | 0.00 | B | C |
| ATOM | 8613 | CG1 | VAL A 595 | -19.986 | 4.966  | 0.797  | 1.00 | 0.00 | B | C |
| ATOM | 8614 | CG2 | VAL A 595 | -19.910 | 4.577  | -1.752 | 1.00 | 0.00 | B | C |
| ATOM | 8615 | C   | VAL A 595 | -22.481 | 6.124  | 0.542  | 1.00 | 0.00 | B | C |
| ATOM | 8616 | O   | VAL A 595 | -22.753 | 5.593  | 1.617  | 1.00 | 0.00 | B | O |
| ATOM | 8617 | N   | VAL A 596 | -22.626 | 7.446  | 0.343  | 1.00 | 0.00 | B | N |
| ATOM | 8618 | CA  | VAL A 596 | -22.953 | 8.328  | 1.429  | 1.00 | 0.00 | B | C |
| ATOM | 8619 | CB  | VAL A 596 | -22.986 | 9.772  | 0.994  | 1.00 | 0.00 | B | C |
| ATOM | 8620 | CG1 | VAL A 596 | -24.273 | 10.057 | 0.202  | 1.00 | 0.00 | B | C |
| ATOM | 8621 | CG2 | VAL A 596 | -22.780 | 10.671 | 2.219  | 1.00 | 0.00 | B | C |
| ATOM | 8622 | C   | VAL A 596 | -24.270 | 7.930  | 2.027  | 1.00 | 0.00 | B | C |
| ATOM | 8623 | O   | VAL A 596 | -24.430 | 7.926  | 3.246  | 1.00 | 0.00 | B | O |
| ATOM | 8624 | N   | THR A 597 | -25.259 | 7.597  | 1.183  | 1.00 | 0.00 | B | N |
| ATOM | 8625 | CA  | THR A 597 | -26.556 | 7.202  | 1.657  | 1.00 | 0.00 | B | C |
| ATOM | 8626 | CB  | THR A 597 | -27.569 | 7.135  | 0.556  | 1.00 | 0.00 | B | C |
| ATOM | 8627 | OG1 | THR A 597 | -28.828 | 6.770  | 1.088  | 1.00 | 0.00 | B | O |
| ATOM | 8628 | CG2 | THR A 597 | -27.117 | 6.102  | -0.487 | 1.00 | 0.00 | B | C |
| ATOM | 8629 | C   | THR A 597 | -26.528 | 5.848  | 2.316  | 1.00 | 0.00 | B | C |
| ATOM | 8630 | O   | THR A 597 | -27.203 | 5.628  | 3.322  | 1.00 | 0.00 | B | O |
| ATOM | 8631 | N   | LEU A 598 | -25.733 | 4.905  | 1.775  | 1.00 | 0.00 | B | N |
| ATOM | 8632 | CA  | LEU A 598 | -25.785 | 3.526  | 2.187  | 1.00 | 0.00 | B | C |
| ATOM | 8633 | CB  | LEU A 598 | -24.765 | 2.662  | 1.421  | 1.00 | 0.00 | B | C |
| ATOM | 8634 | CG  | LEU A 598 | -24.905 | 1.149  | 1.663  | 1.00 | 0.00 | B | C |
| ATOM | 8635 | CD1 | LEU A 598 | -26.113 | 0.572  | 0.911  | 1.00 | 0.00 | B | C |
| ATOM | 8636 | CD2 | LEU A 598 | -23.603 | 0.401  | 1.354  | 1.00 | 0.00 | B | C |
| ATOM | 8637 | C   | LEU A 598 | -25.458 | 3.379  | 3.637  | 1.00 | 0.00 | B | C |
| ATOM | 8638 | O   | LEU A 598 | -26.169 | 2.694  | 4.374  | 1.00 | 0.00 | B | O |
| ATOM | 8639 | N   | ILE A 599 | -24.349 | 3.991  | 4.085  | 1.00 | 0.00 | B | N |
| ATOM | 8640 | CA  | ILE A 599 | -24.021 | 3.888  | 5.467  | 1.00 | 0.00 | B | C |
| ATOM | 8641 | CB  | ILE A 599 | -23.564 | 2.517  | 5.808  | 1.00 | 0.00 | B | C |
| ATOM | 8642 | CG2 | ILE A 599 | -22.513 | 2.051  | 4.793  | 1.00 | 0.00 | B | C |
| ATOM | 8643 | CG1 | ILE A 599 | -23.180 | 2.467  | 7.275  | 1.00 | 0.00 | B | C |
| ATOM | 8644 | CD  | ILE A 599 | -23.046 | 1.038  | 7.736  | 1.00 | 0.00 | B | C |



ATOM 8645 C ILE A 599 -22.986 4.917 5.806 1.00 0.00 B C  
ATOM 8646 O ILE A 599 -21.932 4.982 5.178 1.00 0.00 B O  
ATOM 8647 N GLU A 600 -23.261 5.747 6.833 1.00 0.00 B N  
ATOM 8648 CA GLU A 600 -22.360 6.805 7.192 1.00 0.00 B C  
ATOM 8649 CB GLU A 600 -22.935 7.736 8.278 1.00 0.00 B C  
ATOM 8650 CG GLU A 600 -23.367 7.040 9.570 1.00 0.00 B C  
ATOM 8651 CD GLU A 600 -22.190 6.966 10.530 1.00 0.00 B C  
ATOM 8652 OE1 GLU A 600 -21.638 8.042 10.882 1.00 0.00 B O  
ATOM 8653 OE2 GLU A 600 -21.839 5.827 10.933 1.00 0.00 B O  
ATOM 8654 C GLU A 600 -21.067 6.218 7.658 1.00 0.00 B C  
ATOM 8655 O GLU A 600 -20.000 6.673 7.244 1.00 0.00 B O  
ATOM 8656 N ASP A 601 -21.129 5.167 8.497 1.00 0.00 B N  
ATOM 8657 CA ASP A 601 -19.935 4.529 8.973 1.00 0.00 B C  
ATOM 8658 CB ASP A 601 -19.124 3.870 7.853 1.00 0.00 B C  
ATOM 8659 CG ASP A 601 -19.981 2.782 7.251 1.00 0.00 B C  
ATOM 8660 OD1 ASP A 601 -20.458 1.904 8.019 1.00 0.00 B O  
ATOM 8661 OD2 ASP A 601 -20.189 2.827 6.008 1.00 0.00 B O  
ATOM 8662 C ASP A 601 -19.040 5.562 9.551 1.00 0.00 B C  
ATOM 8663 O ASP A 601 -19.471 6.459 10.278 1.00 0.00 B O  
ATOM 8664 N GLY A 602 -17.731 5.430 9.261 1.00 0.00 B N  
ATOM 8665 CA GLY A 602 -16.829 6.429 9.732 1.00 0.00 B C  
ATOM 8666 C GLY A 602 -15.912 6.778 8.604 1.00 0.00 B C  
ATOM 8667 O GLY A 602 -15.396 5.879 7.943 1.00 0.00 B O  
ATOM 8668 N LYS A 603 -15.720 8.102 8.376 1.00 0.00 B N  
ATOM 8669 CA LYS A 603 -14.797 8.687 7.427 1.00 0.00 B C  
ATOM 8670 CB LYS A 603 -14.208 7.734 6.380 1.00 0.00 B C  
ATOM 8671 CG LYS A 603 -13.023 8.292 5.606 1.00 0.00 B C  
ATOM 8672 CD LYS A 603 -12.255 7.144 4.974 1.00 0.00 B C  
ATOM 8673 CE LYS A 603 -12.130 5.973 5.953 1.00 0.00 B C  
ATOM 8674 NZ LYS A 603 -11.504 4.810 5.292 1.00 0.00 B N  
ATOM 8675 C LYS A 603 -15.408 9.819 6.621 1.00 0.00 B C  
ATOM 8676 O LYS A 603 -15.416 9.656 5.367 1.00 0.00 B O  
ATOM 8677 N TYR B 628 -17.083 7.576 5.975 1.00 0.00 B N  
ATOM 8678 CA TYR B 628 -17.792 8.041 4.769 1.00 0.00 B C  
ATOM 8679 CB TYR B 628 -18.394 6.839 4.040 1.00 0.00 B C  
ATOM 8680 CG TYR B 628 -17.279 6.030 3.485 1.00 0.00 B C  
ATOM 8681 CD1 TYR B 628 -16.555 5.178 4.288 1.00 0.00 B C  
ATOM 8682 CE1 TYR B 628 -15.531 4.427 3.761 1.00 0.00 B C

|      |      |     |     |   |     |         |        |        |      |      |   |   |
|------|------|-----|-----|---|-----|---------|--------|--------|------|------|---|---|
| ATOM | 8683 | CZ  | TYR | B | 628 | -15.227 | 4.524  | 2.424  | 1.00 | 0.00 | B | C |
| ATOM | 8684 | OH  | TYR | B | 628 | -14.176 | 3.753  | 1.883  | 1.00 | 0.00 | B | O |
| ATOM | 8685 | CD2 | TYR | B | 628 | -16.968 | 6.119  | 2.150  | 1.00 | 0.00 | B | C |
| ATOM | 8686 | CE2 | TYR | B | 628 | -15.947 | 5.372  | 1.618  | 1.00 | 0.00 | B | C |
| ATOM | 8687 | C   | TYR | B | 628 | -18.911 | 8.999  | 5.034  | 1.00 | 0.00 | B | C |
| ATOM | 8688 | O   | TYR | B | 628 | -19.766 | 9.215  | 4.176  | 1.00 | 0.00 | B | O |
| ATOM | 8689 | N   | ASN | B | 629 | -18.928 | 9.614  | 6.228  | 1.00 | 0.00 | B | N |
| ATOM | 8690 | CA  | ASN | B | 629 | -19.987 | 10.512 | 6.575  | 1.00 | 0.00 | B | C |
| ATOM | 8691 | CB  | ASN | B | 629 | -19.841 | 11.069 | 7.999  | 1.00 | 0.00 | B | C |
| ATOM | 8692 | CG  | ASN | B | 629 | -19.938 | 9.907  | 8.969  | 1.00 | 0.00 | B | C |
| ATOM | 8693 | OD1 | ASN | B | 629 | -20.315 | 8.796  | 8.597  | 1.00 | 0.00 | B | O |
| ATOM | 8694 | ND2 | ASN | B | 629 | -19.587 | 10.169 | 10.256 | 1.00 | 0.00 | B | N |
| ATOM | 8695 | C   | ASN | B | 629 | -19.967 | 11.688 | 5.643  | 1.00 | 0.00 | B | C |
| ATOM | 8696 | O   | ASN | B | 629 | -21.016 | 12.136 | 5.184  | 1.00 | 0.00 | B | O |
| ATOM | 8697 | N   | SER | B | 630 | -18.765 | 12.209 | 5.329  | 1.00 | 0.00 | B | N |
| ATOM | 8698 | CA  | SER | B | 630 | -18.676 | 13.390 | 4.512  | 1.00 | 0.00 | B | C |
| ATOM | 8699 | CB  | SER | B | 630 | -17.550 | 14.352 | 4.935  | 1.00 | 0.00 | B | C |
| ATOM | 8700 | OG  | SER | B | 630 | -17.519 | 15.482 | 4.074  | 1.00 | 0.00 | B | O |
| ATOM | 8701 | C   | SER | B | 630 | -18.407 | 13.011 | 3.093  | 1.00 | 0.00 | B | C |
| ATOM | 8702 | O   | SER | B | 630 | -17.761 | 12.009 | 2.806  | 1.00 | 0.00 | B | O |
| ATOM | 8703 | N   | LEU | B | 631 | -18.969 | 13.816 | 2.166  | 1.00 | 0.00 | B | N |
| ATOM | 8704 | CA  | LEU | B | 631 | -18.800 | 13.652 | 0.751  | 1.00 | 0.00 | B | C |
| ATOM | 8705 | CB  | LEU | B | 631 | -19.707 | 14.599 | -0.051 | 1.00 | 0.00 | B | C |
| ATOM | 8706 | CG  | LEU | B | 631 | -19.573 | 14.445 | -1.575 | 1.00 | 0.00 | B | C |
| ATOM | 8707 | CD1 | LEU | B | 631 | -20.057 | 13.061 | -2.034 | 1.00 | 0.00 | B | C |
| ATOM | 8708 | CD2 | LEU | B | 631 | -20.276 | 15.588 | -2.323 | 1.00 | 0.00 | B | C |
| ATOM | 8709 | C   | LEU | B | 631 | -17.379 | 13.966 | 0.383  | 1.00 | 0.00 | B | C |
| ATOM | 8710 | O   | LEU | B | 631 | -16.758 | 13.256 | -0.407 | 1.00 | 0.00 | B | O |
| ATOM | 8711 | N   | TYR | B | 632 | -16.816 | 15.045 | 0.964  | 1.00 | 0.00 | B | N |
| ATOM | 8712 | CA  | TYR | B | 632 | -15.479 | 15.448 | 0.630  | 1.00 | 0.00 | B | C |
| ATOM | 8713 | CB  | TYR | B | 632 | -15.040 | 16.727 | 1.366  | 1.00 | 0.00 | B | C |
| ATOM | 8714 | CG  | TYR | B | 632 | -13.579 | 16.917 | 1.130  | 1.00 | 0.00 | B | C |
| ATOM | 8715 | CD1 | TYR | B | 632 | -13.112 | 17.385 | -0.075 | 1.00 | 0.00 | B | C |
| ATOM | 8716 | CE1 | TYR | B | 632 | -11.763 | 17.562 | -0.284 | 1.00 | 0.00 | B | C |
| ATOM | 8717 | CZ  | TYR | B | 632 | -10.867 | 17.273 | 0.718  | 1.00 | 0.00 | B | C |
| ATOM | 8718 | OH  | TYR | B | 632 | -9.484  | 17.453 | 0.508  | 1.00 | 0.00 | B | O |
| ATOM | 8719 | CD2 | TYR | B | 632 | -12.674 | 16.633 | 2.128  | 1.00 | 0.00 | B | C |
| ATOM | 8720 | CE2 | TYR | B | 632 | -11.324 | 16.809 | 1.926  | 1.00 | 0.00 | B | C |

|      |      |     |           |         |        |        |      |      |   |   |
|------|------|-----|-----------|---------|--------|--------|------|------|---|---|
| ATOM | 8721 | C   | TYR B 632 | -14.534 | 14.357 | 1.010  | 1.00 | 0.00 | B | C |
| ATOM | 8722 | O   | TYR B 632 | -13.636 | 14.012 | 0.243  | 1.00 | 0.00 | B | O |
| ATOM | 8723 | N   | SER B 633 | -14.700 | 13.793 | 2.218  | 1.00 | 0.00 | B | N |
| ATOM | 8724 | CA  | SER B 633 | -13.840 | 12.741 | 2.679  | 1.00 | 0.00 | B | C |
| ATOM | 8725 | CB  | SER B 633 | -14.065 | 12.418 | 4.165  | 1.00 | 0.00 | B | C |
| ATOM | 8726 | OG  | SER B 633 | -15.412 | 12.030 | 4.373  | 1.00 | 0.00 | B | O |
| ATOM | 8727 | C   | SER B 633 | -14.072 | 11.484 | 1.889  | 1.00 | 0.00 | B | C |
| ATOM | 8728 | O   | SER B 633 | -13.122 | 10.821 | 1.477  | 1.00 | 0.00 | B | O |
| ATOM | 8729 | N   | THR B 634 | -15.349 | 11.128 | 1.640  | 1.00 | 0.00 | B | N |
| ATOM | 8730 | CA  | THR B 634 | -15.655 | 9.911  | 0.941  | 1.00 | 0.00 | B | C |
| ATOM | 8731 | CB  | THR B 634 | -17.125 | 9.640  | 0.777  | 1.00 | 0.00 | B | C |
| ATOM | 8732 | OG1 | THR B 634 | -17.765 | 10.735 | 0.139  | 1.00 | 0.00 | B | O |
| ATOM | 8733 | CG2 | THR B 634 | -17.760 | 9.352  | 2.139  | 1.00 | 0.00 | B | C |
| ATOM | 8734 | C   | THR B 634 | -15.088 | 9.969  | -0.437 | 1.00 | 0.00 | B | C |
| ATOM | 8735 | O   | THR B 634 | -14.574 | 8.974  | -0.944 | 1.00 | 0.00 | B | O |
| ATOM | 8736 | N   | CYS B 635 | -15.180 | 11.141 | -1.092 | 1.00 | 0.00 | B | N |
| ATOM | 8737 | CA  | CYS B 635 | -14.682 | 11.258 | -2.430 | 1.00 | 0.00 | B | C |
| ATOM | 8738 | CB  | CYS B 635 | -14.886 | 12.663 | -3.025 | 1.00 | 0.00 | B | C |
| ATOM | 8739 | SG  | CYS B 635 | -14.250 | 12.806 | -4.723 | 1.00 | 0.00 | B | S |
| ATOM | 8740 | C   | CYS B 635 | -13.215 | 10.988 | -2.397 | 1.00 | 0.00 | B | C |
| ATOM | 8741 | O   | CYS B 635 | -12.684 | 10.277 | -3.250 | 1.00 | 0.00 | B | O |
| ATOM | 8742 | N   | LEU B 636 | -12.517 | 11.540 | -1.386 | 1.00 | 0.00 | B | N |
| ATOM | 8743 | CA  | LEU B 636 | -11.102 | 11.342 | -1.292 | 1.00 | 0.00 | B | C |
| ATOM | 8744 | CB  | LEU B 636 | -10.445 | 12.107 | -0.132 | 1.00 | 0.00 | B | C |
| ATOM | 8745 | CG  | LEU B 636 | -10.445 | 13.630 | -0.334 | 1.00 | 0.00 | B | C |
| ATOM | 8746 | CD1 | LEU B 636 | -9.727  | 14.346 | 0.821  | 1.00 | 0.00 | B | C |
| ATOM | 8747 | CD2 | LEU B 636 | -9.886  | 14.008 | -1.717 | 1.00 | 0.00 | B | C |
| ATOM | 8748 | C   | LEU B 636 | -10.849 | 9.888  | -1.082 | 1.00 | 0.00 | B | C |
| ATOM | 8749 | O   | LEU B 636 | -9.898  | 9.329  | -1.627 | 1.00 | 0.00 | B | O |
| ATOM | 8750 | N   | GLU B 637 | -11.700 | 9.231  | -0.276 | 1.00 | 0.00 | B | N |
| ATOM | 8751 | CA  | GLU B 637 | -11.506 | 7.843  | 0.001  | 1.00 | 0.00 | B | C |
| ATOM | 8752 | CB  | GLU B 637 | -12.541 | 7.308  | 1.006  | 1.00 | 0.00 | B | C |
| ATOM | 8753 | CG  | GLU B 637 | -12.007 | 6.202  | 1.921  | 1.00 | 0.00 | B | C |
| ATOM | 8754 | CD  | GLU B 637 | -11.349 | 5.125  | 1.077  | 1.00 | 0.00 | B | C |
| ATOM | 8755 | OE1 | GLU B 637 | -12.052 | 4.539  | 0.211  | 1.00 | 0.00 | B | O |
| ATOM | 8756 | OE2 | GLU B 637 | -10.134 | 4.877  | 1.290  | 1.00 | 0.00 | B | O |
| ATOM | 8757 | C   | GLU B 637 | -11.666 | 7.092  | -1.292 | 1.00 | 0.00 | B | C |
| ATOM | 8758 | O   | GLU B 637 | -10.909 | 6.166  | -1.576 | 1.00 | 0.00 | B | O |

|      |      |     |           |         |        |        |      |      |   |   |
|------|------|-----|-----------|---------|--------|--------|------|------|---|---|
| ATOM | 8759 | N   | LEU B 638 | -12.668 | 7.479  | -2.108 | 1.00 | 0.00 | B | N |
| ATOM | 8760 | CA  | LEU B 638 | -12.957 | 6.836  | -3.366 | 1.00 | 0.00 | B | C |
| ATOM | 8761 | CB  | LEU B 638 | -14.236 | 7.357  | -4.045 | 1.00 | 0.00 | B | C |
| ATOM | 8762 | CG  | LEU B 638 | -15.536 | 7.023  | -3.293 | 1.00 | 0.00 | B | C |
| ATOM | 8763 | CD1 | LEU B 638 | -16.764 | 7.486  | -4.093 | 1.00 | 0.00 | B | C |
| ATOM | 8764 | CD2 | LEU B 638 | -15.594 | 5.535  | -2.912 | 1.00 | 0.00 | B | C |
| ATOM | 8765 | C   | LEU B 638 | -11.849 | 7.056  | -4.349 | 1.00 | 0.00 | B | C |
| ATOM | 8766 | O   | LEU B 638 | -11.471 | 6.144  | -5.081 | 1.00 | 0.00 | B | O |
| ATOM | 8767 | N   | PHE B 639 | -11.302 | 8.283  | -4.388 | 1.00 | 0.00 | B | N |
| ATOM | 8768 | CA  | PHE B 639 | -10.276 | 8.644  | -5.326 | 1.00 | 0.00 | B | C |
| ATOM | 8769 | CB  | PHE B 639 | -9.854  | 10.118 | -5.197 | 1.00 | 0.00 | B | C |
| ATOM | 8770 | CG  | PHE B 639 | -8.799  | 10.390 | -6.214 | 1.00 | 0.00 | B | C |
| ATOM | 8771 | CD1 | PHE B 639 | -9.150  | 10.708 | -7.505 | 1.00 | 0.00 | B | C |
| ATOM | 8772 | CE1 | PHE B 639 | -8.189  | 10.959 | -8.456 | 1.00 | 0.00 | B | C |
| ATOM | 8773 | CZ  | PHE B 639 | -6.859  | 10.895 | -8.124 | 1.00 | 0.00 | B | C |
| ATOM | 8774 | CD2 | PHE B 639 | -7.465  | 10.319 | -5.890 | 1.00 | 0.00 | B | C |
| ATOM | 8775 | CE2 | PHE B 639 | -6.501  | 10.572 | -6.838 | 1.00 | 0.00 | B | C |
| ATOM | 8776 | C   | PHE B 639 | -9.085  | 7.786  | -5.052 | 1.00 | 0.00 | B | C |
| ATOM | 8777 | O   | PHE B 639 | -8.387  | 7.360  | -5.973 | 1.00 | 0.00 | B | O |
| ATOM | 8778 | N   | LYS B 640 | -8.830  | 7.500  | -3.763 | 1.00 | 0.00 | B | N |
| ATOM | 8779 | CA  | LYS B 640 | -7.699  | 6.706  | -3.375 | 1.00 | 0.00 | B | C |
| ATOM | 8780 | CB  | LYS B 640 | -7.705  | 6.362  | -1.875 | 1.00 | 0.00 | B | C |
| ATOM | 8781 | CG  | LYS B 640 | -7.650  | 7.564  | -0.932 | 1.00 | 0.00 | B | C |
| ATOM | 8782 | CD  | LYS B 640 | -8.034  | 7.197  | 0.503  | 1.00 | 0.00 | B | C |
| ATOM | 8783 | CE  | LYS B 640 | -7.996  | 8.366  | 1.487  | 1.00 | 0.00 | B | C |
| ATOM | 8784 | NZ  | LYS B 640 | -8.517  | 7.926  | 2.801  | 1.00 | 0.00 | B | N |
| ATOM | 8785 | C   | LYS B 640 | -7.829  | 5.394  | -4.071 | 1.00 | 0.00 | B | C |
| ATOM | 8786 | O   | LYS B 640 | -6.853  | 4.853  | -4.590 | 1.00 | 0.00 | B | O |
| ATOM | 8787 | N   | PHE B 641 | -9.056  | 4.846  | -4.093 | 1.00 | 0.00 | B | N |
| ATOM | 8788 | CA  | PHE B 641 | -9.294  | 3.577  | -4.714 | 1.00 | 0.00 | B | C |
| ATOM | 8789 | CB  | PHE B 641 | -10.718 | 3.036  | -4.498 | 1.00 | 0.00 | B | C |
| ATOM | 8790 | CG  | PHE B 641 | -10.704 | 2.308  | -3.201 | 1.00 | 0.00 | B | C |
| ATOM | 8791 | CD1 | PHE B 641 | -10.391 | 0.967  | -3.179 | 1.00 | 0.00 | B | C |
| ATOM | 8792 | CE1 | PHE B 641 | -10.367 | 0.271  | -1.998 | 1.00 | 0.00 | B | C |
| ATOM | 8793 | CZ  | PHE B 641 | -10.651 | 0.909  | -0.817 | 1.00 | 0.00 | B | C |
| ATOM | 8794 | CD2 | PHE B 641 | -10.983 | 2.946  | -2.016 | 1.00 | 0.00 | B | C |
| ATOM | 8795 | CE2 | PHE B 641 | -10.959 | 2.248  | -0.830 | 1.00 | 0.00 | B | C |
| ATOM | 8796 | C   | PHE B 641 | -9.031  | 3.639  | -6.187 | 1.00 | 0.00 | B | C |

ATOM 8797 O PHE B 641 -8.466 2.704 -6.754 1.00 0.00 B O  
ATOM 8798 N THR B 642 -9.439 4.732 -6.855 1.00 0.00 B N  
ATOM 8799 CA THR B 642 -9.268 4.828 -8.279 1.00 0.00 B C  
ATOM 8800 CB THR B 642 -9.938 6.034 -8.862 1.00 0.00 B C  
ATOM 8801 OG1 THR B 642 -9.315 7.232 -8.430 1.00 0.00 B O  
ATOM 8802 CG2 THR B 642 -11.387 6.006 -8.361 1.00 0.00 B C  
ATOM 8803 C THR B 642 -7.807 4.856 -8.606 1.00 0.00 B C  
ATOM 8804 O THR B 642 -7.369 4.290 -9.606 1.00 0.00 B O  
ATOM 8805 N ILE B 643 -7.015 5.512 -7.740 1.00 0.00 B N  
ATOM 8806 CA ILE B 643 -5.592 5.635 -7.871 1.00 0.00 B C  
ATOM 8807 CB ILE B 643 -4.973 6.363 -6.708 1.00 0.00 B C  
ATOM 8808 CG2 ILE B 643 -3.447 6.345 -6.892 1.00 0.00 B C  
ATOM 8809 CG1 ILE B 643 -5.552 7.780 -6.578 1.00 0.00 B C  
ATOM 8810 CD ILE B 643 -5.210 8.455 -5.248 1.00 0.00 B C  
ATOM 8811 C ILE B 643 -5.035 4.246 -7.855 1.00 0.00 B C  
ATOM 8812 O ILE B 643 -4.025 3.963 -8.497 1.00 0.00 B O  
ATOM 8813 N GLY B 644 -5.677 3.338 -7.092 1.00 0.00 B N  
ATOM 8814 CA GLY B 644 -5.210 1.984 -7.032 1.00 0.00 B C  
ATOM 8815 C GLY B 644 -4.652 1.690 -5.678 1.00 0.00 B C  
ATOM 8816 O GLY B 644 -4.217 0.570 -5.414 1.00 0.00 B O  
ATOM 8817 N MET B 645 -4.626 2.690 -4.780 1.00 0.00 B N  
ATOM 8818 CA MET B 645 -4.146 2.407 -3.460 1.00 0.00 B C  
ATOM 8819 CB MET B 645 -3.132 3.450 -2.960 1.00 0.00 B C  
ATOM 8820 CG MET B 645 -3.668 4.882 -2.997 1.00 0.00 B C  
ATOM 8821 SD MET B 645 -2.459 6.144 -2.498 1.00 0.00 B S  
ATOM 8822 CE MET B 645 -1.390 5.878 -3.941 1.00 0.00 B C  
ATOM 8823 C MET B 645 -5.329 2.411 -2.547 1.00 0.00 B C  
ATOM 8824 O MET B 645 -6.080 3.384 -2.494 1.00 0.00 B O  
ATOM 8825 N GLY B 646 -5.534 1.305 -1.804 1.00 0.00 B N  
ATOM 8826 CA GLY B 646 -6.664 1.262 -0.918 1.00 0.00 B C  
ATOM 8827 C GLY B 646 -6.551 0.071 -0.019 1.00 0.00 B C  
ATOM 8828 O GLY B 646 -5.814 -0.876 -0.292 1.00 0.00 B O  
ATOM 8829 N ASP B 647 -7.294 0.114 1.105 1.00 0.00 B N  
ATOM 8830 CA ASP B 647 -7.346 -0.976 2.039 1.00 0.00 B C  
ATOM 8831 CB ASP B 647 -7.227 -0.530 3.502 1.00 0.00 B C  
ATOM 8832 CG ASP B 647 -5.867 0.094 3.760 1.00 0.00 B C  
ATOM 8833 OD1 ASP B 647 -4.913 -0.202 2.993 1.00 0.00 B O  
ATOM 8834 OD2 ASP B 647 -5.772 0.889 4.735 1.00 0.00 B O

ATOM 8835 C ASP B 647 -8.716 -1.554 1.870 1.00 0.00 B C  
ATOM 8836 O ASP B 647 -9.707 -0.826 1.904 1.00 0.00 B O  
ATOM 8837 N LEU B 648 -8.826 -2.885 1.691 1.00 0.00 B N  
ATOM 8838 CA LEU B 648 -10.122 -3.409 1.362 1.00 0.00 B C  
ATOM 8839 CB LEU B 648 -10.141 -4.309 0.111 1.00 0.00 B C  
ATOM 8840 CG LEU B 648 -9.891 -3.581 -1.221 1.00 0.00 B C  
ATOM 8841 CD1 LEU B 648 -11.002 -2.563 -1.507 1.00 0.00 B C  
ATOM 8842 CD2 LEU B 648 -8.481 -2.978 -1.293 1.00 0.00 B C  
ATOM 8843 C LEU B 648 -10.726 -4.227 2.460 1.00 0.00 B C  
ATOM 8844 O LEU B 648 -10.051 -4.789 3.319 1.00 0.00 B O  
ATOM 8845 N GLU B 649 -12.074 -4.270 2.423 1.00 0.00 B N  
ATOM 8846 CA GLU B 649 -12.933 -5.088 3.229 1.00 0.00 B C  
ATOM 8847 CB GLU B 649 -12.813 -6.587 2.902 1.00 0.00 B C  
ATOM 8848 CG GLU B 649 -13.284 -6.954 1.494 1.00 0.00 B C  
ATOM 8849 CD GLU B 649 -14.790 -6.767 1.447 1.00 0.00 B C  
ATOM 8850 OE1 GLU B 649 -15.231 -5.613 1.194 1.00 0.00 B O  
ATOM 8851 OE2 GLU B 649 -15.518 -7.770 1.668 1.00 0.00 B O  
ATOM 8852 C GLU B 649 -12.688 -4.945 4.698 1.00 0.00 B C  
ATOM 8853 O GLU B 649 -12.708 -5.949 5.408 1.00 0.00 B O  
ATOM 8854 N PHE B 650 -12.476 -3.718 5.217 1.00 0.00 B N  
ATOM 8855 CA PHE B 650 -12.341 -3.637 6.649 1.00 0.00 B C  
ATOM 8856 CB PHE B 650 -12.191 -2.218 7.219 1.00 0.00 B C  
ATOM 8857 CG PHE B 650 -10.847 -1.674 6.913 1.00 0.00 B C  
ATOM 8858 CD1 PHE B 650 -10.638 -0.989 5.745 1.00 0.00 B C  
ATOM 8859 CE1 PHE B 650 -9.400 -0.477 5.465 1.00 0.00 B C  
ATOM 8860 CZ PHE B 650 -8.356 -0.643 6.344 1.00 0.00 B C  
ATOM 8861 CD2 PHE B 650 -9.804 -1.840 7.797 1.00 0.00 B C  
ATOM 8862 CE2 PHE B 650 -8.560 -1.330 7.515 1.00 0.00 B C  
ATOM 8863 C PHE B 650 -13.640 -4.109 7.215 1.00 0.00 B C  
ATOM 8864 O PHE B 650 -13.684 -4.947 8.114 1.00 0.00 B O  
ATOM 8865 N THR B 651 -14.740 -3.548 6.684 1.00 0.00 B N  
ATOM 8866 CA THR B 651 -16.072 -3.941 7.040 1.00 0.00 B C  
ATOM 8867 CB THR B 651 -16.202 -5.436 7.056 1.00 0.00 B C  
ATOM 8868 OG1 THR B 651 -15.894 -5.966 5.779 1.00 0.00 B O  
ATOM 8869 CG2 THR B 651 -17.622 -5.835 7.496 1.00 0.00 B C  
ATOM 8870 C THR B 651 -16.433 -3.480 8.415 1.00 0.00 B C  
ATOM 8871 O THR B 651 -17.620 -3.383 8.724 1.00 0.00 B O  
ATOM 8872 N GLU B 652 -15.464 -3.025 9.220 1.00 0.00 B N

|      |      |     |     |   |     |         |        |        |      |      |   |   |
|------|------|-----|-----|---|-----|---------|--------|--------|------|------|---|---|
| ATOM | 8873 | CA  | GLU | B | 652 | -15.804 | -2.741 | 10.585 | 1.00 | 0.00 | B | C |
| ATOM | 8874 | CB  | GLU | B | 652 | -14.599 | -2.290 | 11.408 | 1.00 | 0.00 | B | C |
| ATOM | 8875 | CG  | GLU | B | 652 | -13.479 | -3.321 | 11.384 | 1.00 | 0.00 | B | C |
| ATOM | 8876 | CD  | GLU | B | 652 | -12.369 | -2.761 | 12.238 | 1.00 | 0.00 | B | C |
| ATOM | 8877 | OE1 | GLU | B | 652 | -12.443 | -2.977 | 13.474 | 1.00 | 0.00 | B | O |
| ATOM | 8878 | OE2 | GLU | B | 652 | -11.446 | -2.104 | 11.684 | 1.00 | 0.00 | B | O |
| ATOM | 8879 | C   | GLU | B | 652 | -16.823 | -1.652 | 10.653 | 1.00 | 0.00 | B | C |
| ATOM | 8880 | O   | GLU | B | 652 | -16.684 | -0.610 | 10.016 | 1.00 | 0.00 | B | O |
| ATOM | 8881 | N   | ASN | B | 653 | -17.872 | -1.883 | 11.470 | 1.00 | 0.00 | B | N |
| ATOM | 8882 | CA  | ASN | B | 653 | -18.949 | -0.949 | 11.645 | 1.00 | 0.00 | B | C |
| ATOM | 8883 | CB  | ASN | B | 653 | -18.444 | 0.427  | 12.082 | 1.00 | 0.00 | B | C |
| ATOM | 8884 | CG  | ASN | B | 653 | -17.601 | 0.182  | 13.310 | 1.00 | 0.00 | B | C |
| ATOM | 8885 | OD1 | ASN | B | 653 | -18.107 | 0.000  | 14.412 | 1.00 | 0.00 | B | O |
| ATOM | 8886 | ND2 | ASN | B | 653 | -16.258 | 0.141  | 13.094 | 1.00 | 0.00 | B | N |
| ATOM | 8887 | C   | ASN | B | 653 | -19.657 | -0.736 | 10.343 | 1.00 | 0.00 | B | C |
| ATOM | 8888 | O   | ASN | B | 653 | -20.078 | 0.381  | 10.042 | 1.00 | 0.00 | B | O |
| ATOM | 8889 | N   | TYR | B | 654 | -19.835 | -1.801 | 9.539  | 1.00 | 0.00 | B | N |
| ATOM | 8890 | CA  | TYR | B | 654 | -20.494 | -1.608 | 8.276  | 1.00 | 0.00 | B | C |
| ATOM | 8891 | CB  | TYR | B | 654 | -19.653 | -1.996 | 7.041  | 1.00 | 0.00 | B | C |
| ATOM | 8892 | CG  | TYR | B | 654 | -18.650 | -0.927 | 6.742  | 1.00 | 0.00 | B | C |
| ATOM | 8893 | CD1 | TYR | B | 654 | -18.988 | 0.154  | 5.968  | 1.00 | 0.00 | B | C |
| ATOM | 8894 | CE1 | TYR | B | 654 | -18.063 | 1.133  | 5.689  | 1.00 | 0.00 | B | C |
| ATOM | 8895 | CZ  | TYR | B | 654 | -16.782 | 1.045  | 6.178  | 1.00 | 0.00 | B | C |
| ATOM | 8896 | OH  | TYR | B | 654 | -15.839 | 2.053  | 5.886  | 1.00 | 0.00 | B | O |
| ATOM | 8897 | CD2 | TYR | B | 654 | -17.366 | -0.992 | 7.220  | 1.00 | 0.00 | B | C |
| ATOM | 8898 | CE2 | TYR | B | 654 | -16.427 | -0.026 | 6.954  | 1.00 | 0.00 | B | C |
| ATOM | 8899 | C   | TYR | B | 654 | -21.759 | -2.405 | 8.213  | 1.00 | 0.00 | B | C |
| ATOM | 8900 | O   | TYR | B | 654 | -21.823 | -3.567 | 8.614  | 1.00 | 0.00 | B | O |
| ATOM | 8901 | N   | ASP | B | 655 | -22.815 | -1.753 | 7.692  | 1.00 | 0.00 | B | N |
| ATOM | 8902 | CA  | ASP | B | 655 | -24.118 | -2.318 | 7.537  | 1.00 | 0.00 | B | C |
| ATOM | 8903 | CB  | ASP | B | 655 | -25.264 | -1.367 | 7.903  | 1.00 | 0.00 | B | C |
| ATOM | 8904 | CG  | ASP | B | 655 | -25.240 | -1.192 | 9.411  | 1.00 | 0.00 | B | C |
| ATOM | 8905 | OD1 | ASP | B | 655 | -24.241 | -1.629 | 10.042 | 1.00 | 0.00 | B | O |
| ATOM | 8906 | OD2 | ASP | B | 655 | -26.226 | -0.630 | 9.951  | 1.00 | 0.00 | B | O |
| ATOM | 8907 | C   | ASP | B | 655 | -24.285 | -2.645 | 6.102  | 1.00 | 0.00 | B | C |
| ATOM | 8908 | O   | ASP | B | 655 | -23.857 | -1.897 | 5.221  | 1.00 | 0.00 | B | O |
| ATOM | 8909 | N   | PHE | B | 656 | -24.966 | -3.770 | 5.836  | 1.00 | 0.00 | B | N |
| ATOM | 8910 | CA  | PHE | B | 656 | -25.111 | -4.190 | 4.485  | 1.00 | 0.00 | B | C |

|      |      |     |           |         |        |        |      |      |   |   |
|------|------|-----|-----------|---------|--------|--------|------|------|---|---|
| ATOM | 8911 | CB  | PHE B 656 | -25.742 | -3.115 | 3.593  | 1.00 | 0.00 | B | C |
| ATOM | 8912 | CG  | PHE B 656 | -26.369 | -2.115 | 4.491  | 1.00 | 0.00 | B | C |
| ATOM | 8913 | CD1 | PHE B 656 | -27.584 | -2.357 | 5.081  | 1.00 | 0.00 | B | C |
| ATOM | 8914 | CE1 | PHE B 656 | -28.149 | -1.415 | 5.907  | 1.00 | 0.00 | B | C |
| ATOM | 8915 | CZ  | PHE B 656 | -27.494 | -0.230 | 6.144  | 1.00 | 0.00 | B | C |
| ATOM | 8916 | CD2 | PHE B 656 | -25.720 | -0.926 | 4.729  | 1.00 | 0.00 | B | C |
| ATOM | 8917 | CE2 | PHE B 656 | -26.279 | 0.018  | 5.554  | 1.00 | 0.00 | B | C |
| ATOM | 8918 | C   | PHE B 656 | -23.728 | -4.350 | 3.988  | 1.00 | 0.00 | B | C |
| ATOM | 8919 | O   | PHE B 656 | -23.433 | -3.939 | 2.878  | 1.00 | 0.00 | B | O |
| ATOM | 8920 | N   | LYS B 657 | -22.814 | -4.891 | 4.806  | 1.00 | 0.00 | B | N |
| ATOM | 8921 | CA  | LYS B 657 | -21.467 | -5.055 | 4.354  | 1.00 | 0.00 | B | C |
| ATOM | 8922 | CB  | LYS B 657 | -20.489 | -5.541 | 5.426  | 1.00 | 0.00 | B | C |
| ATOM | 8923 | CG  | LYS B 657 | -19.041 | -5.437 | 4.947  | 1.00 | 0.00 | B | C |
| ATOM | 8924 | CD  | LYS B 657 | -18.592 | -3.985 | 4.766  | 1.00 | 0.00 | B | C |
| ATOM | 8925 | CE  | LYS B 657 | -17.147 | -3.832 | 4.292  | 1.00 | 0.00 | B | C |
| ATOM | 8926 | NZ  | LYS B 657 | -16.785 | -2.398 | 4.249  | 1.00 | 0.00 | B | N |
| ATOM | 8927 | C   | LYS B 657 | -21.454 | -6.070 | 3.269  | 1.00 | 0.00 | B | C |
| ATOM | 8928 | O   | LYS B 657 | -20.654 | -5.989 | 2.345  | 1.00 | 0.00 | B | O |
| ATOM | 8929 | N   | ALA B 658 | -22.315 | -7.092 | 3.357  | 1.00 | 0.00 | B | N |
| ATOM | 8930 | CA  | ALA B 658 | -22.299 | -8.060 | 2.306  | 1.00 | 0.00 | B | C |
| ATOM | 8931 | CB  | ALA B 658 | -23.313 | -9.194 | 2.516  | 1.00 | 0.00 | B | C |
| ATOM | 8932 | C   | ALA B 658 | -22.679 | -7.354 | 1.047  | 1.00 | 0.00 | B | C |
| ATOM | 8933 | O   | ALA B 658 | -22.076 | -7.579 | -0.003 | 1.00 | 0.00 | B | O |
| ATOM | 8934 | N   | VAL B 659 | -23.703 | -6.480 | 1.111  | 1.00 | 0.00 | B | N |
| ATOM | 8935 | CA  | VAL B 659 | -24.084 | -5.791 | -0.085 | 1.00 | 0.00 | B | C |
| ATOM | 8936 | CB  | VAL B 659 | -25.364 | -4.996 | -0.020 | 1.00 | 0.00 | B | C |
| ATOM | 8937 | CG1 | VAL B 659 | -26.502 | -5.901 | 0.471  | 1.00 | 0.00 | B | C |
| ATOM | 8938 | CG2 | VAL B 659 | -25.148 | -3.699 | 0.767  | 1.00 | 0.00 | B | C |
| ATOM | 8939 | C   | VAL B 659 | -22.999 | -4.818 | -0.439 | 1.00 | 0.00 | B | C |
| ATOM | 8940 | O   | VAL B 659 | -22.747 | -4.555 | -1.609 | 1.00 | 0.00 | B | O |
| ATOM | 8941 | N   | PHE B 660 | -22.363 | -4.236 | 0.590  | 1.00 | 0.00 | B | N |
| ATOM | 8942 | CA  | PHE B 660 | -21.375 | -3.196 | 0.522  | 1.00 | 0.00 | B | C |
| ATOM | 8943 | CB  | PHE B 660 | -20.980 | -2.656 | 1.912  | 1.00 | 0.00 | B | C |
| ATOM | 8944 | CG  | PHE B 660 | -19.933 | -1.597 | 1.755  | 1.00 | 0.00 | B | C |
| ATOM | 8945 | CD1 | PHE B 660 | -18.600 | -1.931 | 1.691  | 1.00 | 0.00 | B | C |
| ATOM | 8946 | CE1 | PHE B 660 | -17.630 | -0.965 | 1.550  | 1.00 | 0.00 | B | C |
| ATOM | 8947 | CZ  | PHE B 660 | -17.988 | 0.358  | 1.474  | 1.00 | 0.00 | B | C |
| ATOM | 8948 | CD2 | PHE B 660 | -20.283 | -0.267 | 1.680  | 1.00 | 0.00 | B | C |



|      |      |               |         |        |        |      |      |   |   |
|------|------|---------------|---------|--------|--------|------|------|---|---|
| ATOM | 8949 | CE2 PHE B 660 | -19.316 | 0.703  | 1.541  | 1.00 | 0.00 | B | C |
| ATOM | 8950 | C PHE B 660   | -20.136 | -3.674 | -0.145 | 1.00 | 0.00 | B | C |
| ATOM | 8951 | O PHE B 660   | -19.602 | -3.017 | -1.031 | 1.00 | 0.00 | B | O |
| ATOM | 8952 | N ILE B 661   | -19.657 | -4.852 | 0.262  | 1.00 | 0.00 | B | N |
| ATOM | 8953 | CA ILE B 661  | -18.451 | -5.420 | -0.242 | 1.00 | 0.00 | B | C |
| ATOM | 8954 | CB ILE B 661  | -18.167 | -6.730 | 0.432  | 1.00 | 0.00 | B | C |
| ATOM | 8955 | CG2 ILE B 661 | -17.906 | -6.454 | 1.924  | 1.00 | 0.00 | B | C |
| ATOM | 8956 | CG1 ILE B 661 | -19.341 | -7.687 | 0.184  | 1.00 | 0.00 | B | C |
| ATOM | 8957 | CD ILE B 661  | -19.150 | -9.085 | 0.743  | 1.00 | 0.00 | B | C |
| ATOM | 8958 | C ILE B 661   | -18.657 | -5.613 | -1.702 | 1.00 | 0.00 | B | C |
| ATOM | 8959 | O ILE B 661   | -17.786 | -5.299 | -2.508 | 1.00 | 0.00 | B | O |
| ATOM | 8960 | N ILE B 662   | -19.850 | -6.092 | -2.083 | 1.00 | 0.00 | B | N |
| ATOM | 8961 | CA ILE B 662  | -20.141 | -6.331 | -3.459 | 1.00 | 0.00 | B | C |
| ATOM | 8962 | CB ILE B 662  | -21.512 | -6.907 | -3.637 | 1.00 | 0.00 | B | C |
| ATOM | 8963 | CG2 ILE B 662 | -21.776 | -7.062 | -5.143 | 1.00 | 0.00 | B | C |
| ATOM | 8964 | CG1 ILE B 662 | -21.612 | -8.227 | -2.856 | 1.00 | 0.00 | B | C |
| ATOM | 8965 | CD ILE B 662  | -23.043 | -8.704 | -2.640 | 1.00 | 0.00 | B | C |
| ATOM | 8966 | C ILE B 662   | -20.073 | -5.022 | -4.178 | 1.00 | 0.00 | B | C |
| ATOM | 8967 | O ILE B 662   | -19.542 | -4.937 | -5.284 | 1.00 | 0.00 | B | O |
| ATOM | 8968 | N LEU B 663   | -20.607 | -3.959 | -3.552 | 1.00 | 0.00 | B | N |
| ATOM | 8969 | CA LEU B 663  | -20.652 | -2.653 | -4.144 | 1.00 | 0.00 | B | C |
| ATOM | 8970 | CB LEU B 663  | -21.416 | -1.669 | -3.236 | 1.00 | 0.00 | B | C |
| ATOM | 8971 | CG LEU B 663  | -21.537 | -0.229 | -3.767 | 1.00 | 0.00 | B | C |
| ATOM | 8972 | CD1 LEU B 663 | -20.205 | 0.531  | -3.661 | 1.00 | 0.00 | B | C |
| ATOM | 8973 | CD2 LEU B 663 | -22.116 | -0.216 | -5.188 | 1.00 | 0.00 | B | C |
| ATOM | 8974 | C LEU B 663   | -19.249 | -2.170 | -4.367 | 1.00 | 0.00 | B | C |
| ATOM | 8975 | O LEU B 663   | -18.940 | -1.568 | -5.397 | 1.00 | 0.00 | B | O |
| ATOM | 8976 | N LEU B 664   | -18.355 | -2.423 | -3.396 | 1.00 | 0.00 | B | N |
| ATOM | 8977 | CA LEU B 664  | -17.001 | -1.966 | -3.479 | 1.00 | 0.00 | B | C |
| ATOM | 8978 | CB LEU B 664  | -16.264 | -2.227 | -2.152 | 1.00 | 0.00 | B | C |
| ATOM | 8979 | CG LEU B 664  | -14.909 | -1.518 | -2.009 | 1.00 | 0.00 | B | C |
| ATOM | 8980 | CD1 LEU B 664 | -13.876 | -2.080 | -2.990 | 1.00 | 0.00 | B | C |
| ATOM | 8981 | CD2 LEU B 664 | -15.067 | 0.008  | -2.115 | 1.00 | 0.00 | B | C |
| ATOM | 8982 | C LEU B 664   | -16.323 | -2.673 | -4.610 | 1.00 | 0.00 | B | C |
| ATOM | 8983 | O LEU B 664   | -15.584 | -2.066 | -5.386 | 1.00 | 0.00 | B | O |
| ATOM | 8984 | N LEU B 665   | -16.574 | -3.990 | -4.752 | 1.00 | 0.00 | B | N |
| ATOM | 8985 | CA LEU B 665  | -15.964 | -4.719 | -5.822 | 1.00 | 0.00 | B | C |
| ATOM | 8986 | CB LEU B 665  | -16.218 | -6.236 | -5.776 | 1.00 | 0.00 | B | C |

|      |      |     |     |   |     |         |        |         |      |      |   |   |
|------|------|-----|-----|---|-----|---------|--------|---------|------|------|---|---|
| ATOM | 8987 | CG  | LEU | B | 665 | -15.305 | -6.988 | -4.782  | 1.00 | 0.00 | B | C |
| ATOM | 8988 | CD1 | LEU | B | 665 | -15.470 | -6.494 | -3.339  | 1.00 | 0.00 | B | C |
| ATOM | 8989 | CD2 | LEU | B | 665 | -15.484 | -8.507 | -4.910  | 1.00 | 0.00 | B | C |
| ATOM | 8990 | C   | LEU | B | 665 | -16.444 | -4.185 | -7.130  | 1.00 | 0.00 | B | C |
| ATOM | 8991 | O   | LEU | B | 665 | -15.662 | -4.047 | -8.068  | 1.00 | 0.00 | B | O |
| ATOM | 8992 | N   | ALA | B | 666 | -17.745 | -3.859 | -7.238  | 1.00 | 0.00 | B | N |
| ATOM | 8993 | CA  | ALA | B | 666 | -18.262 | -3.392 | -8.490  | 1.00 | 0.00 | B | C |
| ATOM | 8994 | CB  | ALA | B | 666 | -19.781 | -3.150 | -8.445  | 1.00 | 0.00 | B | C |
| ATOM | 8995 | C   | ALA | B | 666 | -17.622 | -2.090 | -8.878  | 1.00 | 0.00 | B | C |
| ATOM | 8996 | O   | ALA | B | 666 | -17.183 | -1.928 | -10.014 | 1.00 | 0.00 | B | O |
| ATOM | 8997 | N   | TYR | B | 667 | -17.559 | -1.122 | -7.944  | 1.00 | 0.00 | B | N |
| ATOM | 8998 | CA  | TYR | B | 667 | -17.033 | 0.172  | -8.272  | 1.00 | 0.00 | B | C |
| ATOM | 8999 | CB  | TYR | B | 667 | -17.325 | 1.216  | -7.181  | 1.00 | 0.00 | B | C |
| ATOM | 9000 | CG  | TYR | B | 667 | -16.686 | 2.499  | -7.586  | 1.00 | 0.00 | B | C |
| ATOM | 9001 | CD1 | TYR | B | 667 | -17.139 | 3.190  | -8.683  | 1.00 | 0.00 | B | C |
| ATOM | 9002 | CE1 | TYR | B | 667 | -16.560 | 4.380  | -9.054  | 1.00 | 0.00 | B | C |
| ATOM | 9003 | CZ  | TYR | B | 667 | -15.520 | 4.892  | -8.322  | 1.00 | 0.00 | B | C |
| ATOM | 9004 | OH  | TYR | B | 667 | -14.928 | 6.113  | -8.704  | 1.00 | 0.00 | B | O |
| ATOM | 9005 | CD2 | TYR | B | 667 | -15.645 | 3.022  | -6.854  | 1.00 | 0.00 | B | C |
| ATOM | 9006 | CE2 | TYR | B | 667 | -15.061 | 4.211  | -7.220  | 1.00 | 0.00 | B | C |
| ATOM | 9007 | C   | TYR | B | 667 | -15.557 | 0.136  | -8.503  | 1.00 | 0.00 | B | C |
| ATOM | 9008 | O   | TYR | B | 667 | -15.066 | 0.668  | -9.497  | 1.00 | 0.00 | B | O |
| ATOM | 9009 | N   | VAL | B | 668 | -14.805 | -0.499 | -7.589  | 1.00 | 0.00 | B | N |
| ATOM | 9010 | CA  | VAL | B | 668 | -13.378 | -0.480 | -7.705  | 1.00 | 0.00 | B | C |
| ATOM | 9011 | CB  | VAL | B | 668 | -12.680 | -1.106 | -6.537  | 1.00 | 0.00 | B | C |
| ATOM | 9012 | CG1 | VAL | B | 668 | -11.168 | -1.102 | -6.818  | 1.00 | 0.00 | B | C |
| ATOM | 9013 | CG2 | VAL | B | 668 | -13.083 | -0.348 | -5.261  | 1.00 | 0.00 | B | C |
| ATOM | 9014 | C   | VAL | B | 668 | -12.946 | -1.220 | -8.927  | 1.00 | 0.00 | B | C |
| ATOM | 9015 | O   | VAL | B | 668 | -12.123 | -0.730 | -9.700  | 1.00 | 0.00 | B | O |
| ATOM | 9016 | N   | ILE | B | 669 | -13.508 | -2.421 | -9.154  | 1.00 | 0.00 | B | N |
| ATOM | 9017 | CA  | ILE | B | 669 | -13.014 | -3.200 | -10.249 | 1.00 | 0.00 | B | C |
| ATOM | 9018 | CB  | ILE | B | 669 | -13.598 | -4.592 | -10.325 | 1.00 | 0.00 | B | C |
| ATOM | 9019 | CG2 | ILE | B | 669 | -13.284 | -5.269 | -8.978  | 1.00 | 0.00 | B | C |
| ATOM | 9020 | CG1 | ILE | B | 669 | -15.093 | -4.615 | -10.689 | 1.00 | 0.00 | B | C |
| ATOM | 9021 | CD  | ILE | B | 669 | -15.366 | -4.516 | -12.192 | 1.00 | 0.00 | B | C |
| ATOM | 9022 | C   | ILE | B | 669 | -13.288 | -2.459 | -11.515 | 1.00 | 0.00 | B | C |
| ATOM | 9023 | O   | ILE | B | 669 | -12.416 | -2.341 | -12.373 | 1.00 | 0.00 | B | O |
| ATOM | 9024 | N   | LEU | B | 670 | -14.501 | -1.898 | -11.646 | 1.00 | 0.00 | B | N |

|      |      |     |     |   |     |         |        |         |      |      |   |   |
|------|------|-----|-----|---|-----|---------|--------|---------|------|------|---|---|
| ATOM | 9025 | CA  | LEU | B | 670 | -14.873 | -1.232 | -12.860 | 1.00 | 0.00 | B | C |
| ATOM | 9026 | CB  | LEU | B | 670 | -16.303 | -0.663 | -12.799 | 1.00 | 0.00 | B | C |
| ATOM | 9027 | CG  | LEU | B | 670 | -16.664 | 0.237  | -13.997 | 1.00 | 0.00 | B | C |
| ATOM | 9028 | CD1 | LEU | B | 670 | -16.614 | -0.544 | -15.317 | 1.00 | 0.00 | B | C |
| ATOM | 9029 | CD2 | LEU | B | 670 | -18.006 | 0.959  | -13.784 | 1.00 | 0.00 | B | C |
| ATOM | 9030 | C   | LEU | B | 670 | -13.967 | -0.071 | -13.100 | 1.00 | 0.00 | B | C |
| ATOM | 9031 | O   | LEU | B | 670 | -13.443 | 0.098  | -14.200 | 1.00 | 0.00 | B | O |
| ATOM | 9032 | N   | THR | B | 671 | -13.733 | 0.752  | -12.061 | 1.00 | 0.00 | B | N |
| ATOM | 9033 | CA  | THR | B | 671 | -12.986 | 1.954  | -12.297 | 1.00 | 0.00 | B | C |
| ATOM | 9034 | CB  | THR | B | 671 | -12.901 | 2.889  | -11.121 | 1.00 | 0.00 | B | C |
| ATOM | 9035 | OG1 | THR | B | 671 | -12.067 | 2.370  | -10.098 | 1.00 | 0.00 | B | O |
| ATOM | 9036 | CG2 | THR | B | 671 | -14.318 | 3.081  | -10.577 | 1.00 | 0.00 | B | C |
| ATOM | 9037 | C   | THR | B | 671 | -11.593 | 1.622  | -12.699 | 1.00 | 0.00 | B | C |
| ATOM | 9038 | O   | THR | B | 671 | -11.046 | 2.218  | -13.625 | 1.00 | 0.00 | B | O |
| ATOM | 9039 | N   | TYR | B | 672 | -10.963 | 0.667  | -12.001 | 1.00 | 0.00 | B | N |
| ATOM | 9040 | CA  | TYR | B | 672 | -9.609  | 0.355  | -12.337 | 1.00 | 0.00 | B | C |
| ATOM | 9041 | CB  | TYR | B | 672 | -8.984  | -0.651 | -11.350 | 1.00 | 0.00 | B | C |
| ATOM | 9042 | CG  | TYR | B | 672 | -7.581  | -0.938 | -11.766 | 1.00 | 0.00 | B | C |
| ATOM | 9043 | CD1 | TYR | B | 672 | -6.571  | -0.028 | -11.535 | 1.00 | 0.00 | B | C |
| ATOM | 9044 | CE1 | TYR | B | 672 | -5.279  | -0.301 | -11.917 | 1.00 | 0.00 | B | C |
| ATOM | 9045 | CZ  | TYR | B | 672 | -4.981  | -1.499 | -12.532 | 1.00 | 0.00 | B | C |
| ATOM | 9046 | OH  | TYR | B | 672 | -3.658  | -1.789 | -12.929 | 1.00 | 0.00 | B | O |
| ATOM | 9047 | CD2 | TYR | B | 672 | -7.269  | -2.132 | -12.369 | 1.00 | 0.00 | B | C |
| ATOM | 9048 | CE2 | TYR | B | 672 | -5.978  | -2.412 | -12.754 | 1.00 | 0.00 | B | C |
| ATOM | 9049 | C   | TYR | B | 672 | -9.602  | -0.239 | -13.702 | 1.00 | 0.00 | B | C |
| ATOM | 9050 | O   | TYR | B | 672 | -8.791  | 0.123  | -14.553 | 1.00 | 0.00 | B | O |
| ATOM | 9051 | N   | ILE | B | 673 | -10.532 | -1.179 | -13.943 | 1.00 | 0.00 | B | N |
| ATOM | 9052 | CA  | ILE | B | 673 | -10.492 | -1.878 | -15.180 | 1.00 | 0.00 | B | C |
| ATOM | 9053 | CB  | ILE | B | 673 | -11.328 | -3.127 | -15.150 | 1.00 | 0.00 | B | C |
| ATOM | 9054 | CG2 | ILE | B | 673 | -12.817 | -2.756 | -15.063 | 1.00 | 0.00 | B | C |
| ATOM | 9055 | CG1 | ILE | B | 673 | -10.960 | -4.011 | -16.345 | 1.00 | 0.00 | B | C |
| ATOM | 9056 | CD  | ILE | B | 673 | -9.522  | -4.524 | -16.276 | 1.00 | 0.00 | B | C |
| ATOM | 9057 | C   | ILE | B | 673 | -10.867 | -1.041 | -16.374 | 1.00 | 0.00 | B | C |
| ATOM | 9058 | O   | ILE | B | 673 | -10.117 | -1.013 | -17.345 | 1.00 | 0.00 | B | O |
| ATOM | 9059 | N   | LEU | B | 674 | -12.047 | -0.383 | -16.380 | 1.00 | 0.00 | B | N |
| ATOM | 9060 | CA  | LEU | B | 674 | -12.435 | 0.338  | -17.566 | 1.00 | 0.00 | B | C |
| ATOM | 9061 | CB  | LEU | B | 674 | -13.960 | 0.452  | -17.705 | 1.00 | 0.00 | B | C |
| ATOM | 9062 | CG  | LEU | B | 674 | -14.634 | -0.926 | -17.811 | 1.00 | 0.00 | B | C |

|      |      |     |     |   |     |         |        |         |      |      |   |   |
|------|------|-----|-----|---|-----|---------|--------|---------|------|------|---|---|
| ATOM | 9063 | CD1 | LEU | B | 674 | -16.109 | -0.796 | -18.213 | 1.00 | 0.00 | B | C |
| ATOM | 9064 | CD2 | LEU | B | 674 | -13.839 | -1.865 | -18.730 | 1.00 | 0.00 | B | C |
| ATOM | 9065 | C   | LEU | B | 674 | -11.852 | 1.715  | -17.729 | 1.00 | 0.00 | B | C |
| ATOM | 9066 | O   | LEU | B | 674 | -11.239 | 2.019  | -18.750 | 1.00 | 0.00 | B | O |
| ATOM | 9067 | N   | LEU | B | 675 | -12.025 | 2.583  | -16.712 | 1.00 | 0.00 | B | N |
| ATOM | 9068 | CA  | LEU | B | 675 | -11.679 | 3.978  | -16.825 | 1.00 | 0.00 | B | C |
| ATOM | 9069 | CB  | LEU | B | 675 | -12.072 | 4.772  | -15.566 | 1.00 | 0.00 | B | C |
| ATOM | 9070 | CG  | LEU | B | 675 | -13.568 | 5.107  | -15.437 | 1.00 | 0.00 | B | C |
| ATOM | 9071 | CD1 | LEU | B | 675 | -13.978 | 6.181  | -16.459 | 1.00 | 0.00 | B | C |
| ATOM | 9072 | CD2 | LEU | B | 675 | -14.439 | 3.845  | -15.510 | 1.00 | 0.00 | B | C |
| ATOM | 9073 | C   | LEU | B | 675 | -10.215 | 4.204  | -16.999 | 1.00 | 0.00 | B | C |
| ATOM | 9074 | O   | LEU | B | 675 | -9.787  | 4.849  | -17.955 | 1.00 | 0.00 | B | O |
| ATOM | 9075 | N   | LEU | B | 676 | -9.405  | 3.662  | -16.076 | 1.00 | 0.00 | B | N |
| ATOM | 9076 | CA  | LEU | B | 676 | -8.005  | 3.956  | -16.114 | 1.00 | 0.00 | B | C |
| ATOM | 9077 | CB  | LEU | B | 676 | -7.224  | 3.405  | -14.911 | 1.00 | 0.00 | B | C |
| ATOM | 9078 | CG  | LEU | B | 676 | -7.496  | 4.183  | -13.614 | 1.00 | 0.00 | B | C |
| ATOM | 9079 | CD1 | LEU | B | 676 | -7.013  | 5.639  | -13.752 | 1.00 | 0.00 | B | C |
| ATOM | 9080 | CD2 | LEU | B | 676 | -8.963  | 4.074  | -13.172 | 1.00 | 0.00 | B | C |
| ATOM | 9081 | C   | LEU | B | 676 | -7.408  | 3.395  | -17.351 | 1.00 | 0.00 | B | C |
| ATOM | 9082 | O   | LEU | B | 676 | -6.654  | 4.078  | -18.040 | 1.00 | 0.00 | B | O |
| ATOM | 9083 | N   | ASN | B | 677 | -7.749  | 2.138  | -17.677 | 1.00 | 0.00 | B | N |
| ATOM | 9084 | CA  | ASN | B | 677 | -7.195  | 1.503  | -18.831 | 1.00 | 0.00 | B | C |
| ATOM | 9085 | CB  | ASN | B | 677 | -7.649  | 0.040  | -18.967 | 1.00 | 0.00 | B | C |
| ATOM | 9086 | CG  | ASN | B | 677 | -7.130  | -0.706 | -17.747 | 1.00 | 0.00 | B | C |
| ATOM | 9087 | OD1 | ASN | B | 677 | -6.291  | -0.195 | -17.007 | 1.00 | 0.00 | B | O |
| ATOM | 9088 | ND2 | ASN | B | 677 | -7.633  | -1.949 | -17.529 | 1.00 | 0.00 | B | N |
| ATOM | 9089 | C   | ASN | B | 677 | -7.673  | 2.243  | -20.036 | 1.00 | 0.00 | B | C |
| ATOM | 9090 | O   | ASN | B | 677 | -6.911  | 2.471  | -20.973 | 1.00 | 0.00 | B | O |
| ATOM | 9091 | N   | MET | B | 678 | -8.957  | 2.640  | -20.036 | 1.00 | 0.00 | B | N |
| ATOM | 9092 | CA  | MET | B | 678 | -9.529  | 3.329  | -21.154 | 1.00 | 0.00 | B | C |
| ATOM | 9093 | CB  | MET | B | 678 | -11.015 | 3.664  | -20.934 | 1.00 | 0.00 | B | C |
| ATOM | 9094 | CG  | MET | B | 678 | -11.658 | 4.476  | -22.061 | 1.00 | 0.00 | B | C |
| ATOM | 9095 | SD  | MET | B | 678 | -13.461 | 4.666  | -21.904 | 1.00 | 0.00 | B | S |
| ATOM | 9096 | CE  | MET | B | 678 | -13.399 | 5.650  | -20.379 | 1.00 | 0.00 | B | C |
| ATOM | 9097 | C   | MET | B | 678 | -8.817  | 4.624  | -21.359 | 1.00 | 0.00 | B | C |
| ATOM | 9098 | O   | MET | B | 678 | -8.461  | 4.962  | -22.485 | 1.00 | 0.00 | B | O |
| ATOM | 9099 | N   | LEU | B | 679 | -8.581  | 5.397  | -20.280 | 1.00 | 0.00 | B | N |
| ATOM | 9100 | CA  | LEU | B | 679 | -7.938  | 6.659  | -20.493 | 1.00 | 0.00 | B | C |

|      |      |     |     |   |     |        |        |         |      |      |   |   |
|------|------|-----|-----|---|-----|--------|--------|---------|------|------|---|---|
| ATOM | 9101 | CB  | LEU | B | 679 | -7.938 | 7.587  | -19.253 | 1.00 | 0.00 | B | C |
| ATOM | 9102 | CG  | LEU | B | 679 | -6.747 | 7.468  | -18.278 | 1.00 | 0.00 | B | C |
| ATOM | 9103 | CD1 | LEU | B | 679 | -5.482 | 8.161  | -18.817 | 1.00 | 0.00 | B | C |
| ATOM | 9104 | CD2 | LEU | B | 679 | -7.135 | 7.975  | -16.878 | 1.00 | 0.00 | B | C |
| ATOM | 9105 | C   | LEU | B | 679 | -6.528 | 6.418  | -20.935 | 1.00 | 0.00 | B | C |
| ATOM | 9106 | O   | LEU | B | 679 | -6.043 | 7.056  | -21.867 | 1.00 | 0.00 | B | O |
| ATOM | 9107 | N   | ILE | B | 680 | -5.846 | 5.459  | -20.278 | 1.00 | 0.00 | B | N |
| ATOM | 9108 | CA  | ILE | B | 680 | -4.458 | 5.172  | -20.522 | 1.00 | 0.00 | B | C |
| ATOM | 9109 | CB  | ILE | B | 680 | -3.895 | 4.141  | -19.586 | 1.00 | 0.00 | B | C |
| ATOM | 9110 | CG2 | ILE | B | 680 | -2.461 | 3.822  | -20.041 | 1.00 | 0.00 | B | C |
| ATOM | 9111 | CG1 | ILE | B | 680 | -3.976 | 4.638  | -18.130 | 1.00 | 0.00 | B | C |
| ATOM | 9112 | CD  | ILE | B | 680 | -3.227 | 5.944  | -17.880 | 1.00 | 0.00 | B | C |
| ATOM | 9113 | C   | ILE | B | 680 | -4.284 | 4.683  | -21.924 | 1.00 | 0.00 | B | C |
| ATOM | 9114 | O   | ILE | B | 680 | -3.310 | 5.027  | -22.593 | 1.00 | 0.00 | B | O |
| ATOM | 9115 | N   | ALA | B | 681 | -5.223 | 3.851  | -22.404 | 1.00 | 0.00 | B | N |
| ATOM | 9116 | CA  | ALA | B | 681 | -5.147 | 3.310  | -23.728 | 1.00 | 0.00 | B | C |
| ATOM | 9117 | CB  | ALA | B | 681 | -6.336 | 2.396  | -24.071 | 1.00 | 0.00 | B | C |
| ATOM | 9118 | C   | ALA | B | 681 | -5.182 | 4.467  | -24.668 | 1.00 | 0.00 | B | C |
| ATOM | 9119 | O   | ALA | B | 681 | -4.494 | 4.480  | -25.687 | 1.00 | 0.00 | B | O |
| ATOM | 9120 | N   | LEU | B | 682 | -5.994 | 5.476  | -24.321 | 1.00 | 0.00 | B | N |
| ATOM | 9121 | CA  | LEU | B | 682 | -6.176 | 6.667  | -25.097 | 1.00 | 0.00 | B | C |
| ATOM | 9122 | CB  | LEU | B | 682 | -7.155 | 7.645  | -24.420 | 1.00 | 0.00 | B | C |
| ATOM | 9123 | CG  | LEU | B | 682 | -8.589 | 7.111  | -24.249 | 1.00 | 0.00 | B | C |
| ATOM | 9124 | CD1 | LEU | B | 682 | -9.472 | 8.126  | -23.507 | 1.00 | 0.00 | B | C |
| ATOM | 9125 | CD2 | LEU | B | 682 | -9.191 | 6.691  | -25.600 | 1.00 | 0.00 | B | C |
| ATOM | 9126 | C   | LEU | B | 682 | -4.863 | 7.396  | -25.180 | 1.00 | 0.00 | B | C |
| ATOM | 9127 | O   | LEU | B | 682 | -4.532 | 7.971  | -26.217 | 1.00 | 0.00 | B | O |
| ATOM | 9128 | N   | MET | B | 683 | -4.071 | 7.366  | -24.090 | 1.00 | 0.00 | B | N |
| ATOM | 9129 | CA  | MET | B | 683 | -2.856 | 8.128  | -23.958 | 1.00 | 0.00 | B | C |
| ATOM | 9130 | CB  | MET | B | 683 | -2.116 | 7.834  | -22.636 | 1.00 | 0.00 | B | C |
| ATOM | 9131 | CG  | MET | B | 683 | -2.826 | 8.278  | -21.354 | 1.00 | 0.00 | B | C |
| ATOM | 9132 | SD  | MET | B | 683 | -2.738 | 10.058 | -20.998 | 1.00 | 0.00 | B | S |
| ATOM | 9133 | CE  | MET | B | 683 | -3.102 | 9.878  | -19.226 | 1.00 | 0.00 | B | C |
| ATOM | 9134 | C   | MET | B | 683 | -1.873 | 7.791  | -25.039 | 1.00 | 0.00 | B | C |
| ATOM | 9135 | O   | MET | B | 683 | -1.243 | 8.681  | -25.609 | 1.00 | 0.00 | B | O |
| ATOM | 9136 | N   | GLY | B | 684 | -1.719 | 6.502  | -25.380 | 1.00 | 0.00 | B | N |
| ATOM | 9137 | CA  | GLY | B | 684 | -0.690 | 6.137  | -26.311 | 1.00 | 0.00 | B | C |
| ATOM | 9138 | C   | GLY | B | 684 | -0.900 | 6.837  | -27.617 | 1.00 | 0.00 | B | C |

|      |      |     |           |        |        |         |      |      |   |   |
|------|------|-----|-----------|--------|--------|---------|------|------|---|---|
| ATOM | 9139 | O   | GLY B 684 | 0.058  | 7.290  | -28.238 | 1.00 | 0.00 | B | O |
| ATOM | 9140 | N   | GLU B 685 | -2.159 | 6.957  | -28.063 | 1.00 | 0.00 | B | N |
| ATOM | 9141 | CA  | GLU B 685 | -2.453 | 7.508  | -29.355 | 1.00 | 0.00 | B | C |
| ATOM | 9142 | CB  | GLU B 685 | -3.966 | 7.577  | -29.603 | 1.00 | 0.00 | B | C |
| ATOM | 9143 | CG  | GLU B 685 | -4.640 | 6.206  | -29.612 | 1.00 | 0.00 | B | C |
| ATOM | 9144 | CD  | GLU B 685 | -6.144 | 6.430  | -29.524 | 1.00 | 0.00 | B | C |
| ATOM | 9145 | OE1 | GLU B 685 | -6.633 | 6.702  | -28.394 | 1.00 | 0.00 | B | O |
| ATOM | 9146 | OE2 | GLU B 685 | -6.822 | 6.337  | -30.579 | 1.00 | 0.00 | B | O |
| ATOM | 9147 | C   | GLU B 685 | -1.947 | 8.913  | -29.441 | 1.00 | 0.00 | B | C |
| ATOM | 9148 | O   | GLU B 685 | -1.328 | 9.293  | -30.433 | 1.00 | 0.00 | B | O |
| ATOM | 9149 | N   | THR B 686 | -2.198 | 9.722  | -28.395 | 1.00 | 0.00 | B | N |
| ATOM | 9150 | CA  | THR B 686 | -1.798 | 11.099 | -28.419 | 1.00 | 0.00 | B | C |
| ATOM | 9151 | CB  | THR B 686 | -2.216 | 11.859 | -27.194 | 1.00 | 0.00 | B | C |
| ATOM | 9152 | OG1 | THR B 686 | -1.571 | 11.333 | -26.042 | 1.00 | 0.00 | B | O |
| ATOM | 9153 | CG2 | THR B 686 | -3.742 | 11.752 | -27.047 | 1.00 | 0.00 | B | C |
| ATOM | 9154 | C   | THR B 686 | -0.311 | 11.161 | -28.485 | 1.00 | 0.00 | B | C |
| ATOM | 9155 | O   | THR B 686 | 0.252  | 11.970 | -29.221 | 1.00 | 0.00 | B | O |
| ATOM | 9156 | N   | VAL B 687 | 0.363  | 10.306 | -27.693 | 1.00 | 0.00 | B | N |
| ATOM | 9157 | CA  | VAL B 687 | 1.796  | 10.278 | -27.668 | 1.00 | 0.00 | B | C |
| ATOM | 9158 | CB  | VAL B 687 | 2.350  | 9.336  | -26.637 | 1.00 | 0.00 | B | C |
| ATOM | 9159 | CG1 | VAL B 687 | 3.877  | 9.271  | -26.810 | 1.00 | 0.00 | B | C |
| ATOM | 9160 | CG2 | VAL B 687 | 1.905  | 9.817  | -25.247 | 1.00 | 0.00 | B | C |
| ATOM | 9161 | C   | VAL B 687 | 2.311  | 9.832  | -29.006 | 1.00 | 0.00 | B | C |
| ATOM | 9162 | O   | VAL B 687 | 3.289  | 10.374 | -29.516 | 1.00 | 0.00 | B | O |
| ATOM | 9163 | N   | ASN B 688 | 1.679  | 8.811  | -29.606 | 1.00 | 0.00 | B | N |
| ATOM | 9164 | CA  | ASN B 688 | 2.151  | 8.308  | -30.865 | 1.00 | 0.00 | B | C |
| ATOM | 9165 | CB  | ASN B 688 | 1.397  | 7.050  | -31.340 | 1.00 | 0.00 | B | C |
| ATOM | 9166 | CG  | ASN B 688 | 1.940  | 5.837  | -30.596 | 1.00 | 0.00 | B | C |
| ATOM | 9167 | OD1 | ASN B 688 | 3.042  | 5.369  | -30.880 | 1.00 | 0.00 | B | O |
| ATOM | 9168 | ND2 | ASN B 688 | 1.156  | 5.307  | -29.623 | 1.00 | 0.00 | B | N |
| ATOM | 9169 | C   | ASN B 688 | 1.988  | 9.339  | -31.931 | 1.00 | 0.00 | B | C |
| ATOM | 9170 | O   | ASN B 688 | 2.912  | 9.587  | -32.704 | 1.00 | 0.00 | B | O |
| ATOM | 9171 | N   | LYS B 689 | 0.805  | 9.976  | -32.006 | 1.00 | 0.00 | B | N |
| ATOM | 9172 | CA  | LYS B 689 | 0.597  | 10.906 | -33.070 | 1.00 | 0.00 | B | C |
| ATOM | 9173 | CB  | LYS B 689 | -0.856 | 11.374 | -33.255 | 1.00 | 0.00 | B | C |
| ATOM | 9174 | CG  | LYS B 689 | -1.423 | 12.285 | -32.172 | 1.00 | 0.00 | B | C |
| ATOM | 9175 | CD  | LYS B 689 | -2.707 | 12.959 | -32.661 | 1.00 | 0.00 | B | C |
| ATOM | 9176 | CE  | LYS B 689 | -3.518 | 13.667 | -31.579 | 1.00 | 0.00 | B | C |

|      |      |     |     |   |     |        |        |         |      |      |   |   |
|------|------|-----|-----|---|-----|--------|--------|---------|------|------|---|---|
| ATOM | 9177 | NZ  | LYS | B | 689 | -4.793 | 14.149 | -32.156 | 1.00 | 0.00 | B | N |
| ATOM | 9178 | C   | LYS | B | 689 | 1.489  | 12.089 | -32.894 | 1.00 | 0.00 | B | C |
| ATOM | 9179 | O   | LYS | B | 689 | 2.017  | 12.618 | -33.870 | 1.00 | 0.00 | B | O |
| ATOM | 9180 | N   | ILE | B | 690 | 1.689  | 12.533 | -31.643 | 1.00 | 0.00 | B | N |
| ATOM | 9181 | CA  | ILE | B | 690 | 2.539  | 13.670 | -31.448 | 1.00 | 0.00 | B | C |
| ATOM | 9182 | CB  | ILE | B | 690 | 2.602  | 14.184 | -30.041 | 1.00 | 0.00 | B | C |
| ATOM | 9183 | CG2 | ILE | B | 690 | 2.996  | 13.054 | -29.089 | 1.00 | 0.00 | B | C |
| ATOM | 9184 | CG1 | ILE | B | 690 | 3.537  | 15.399 | -29.998 | 1.00 | 0.00 | B | C |
| ATOM | 9185 | CD  | ILE | B | 690 | 3.490  | 16.138 | -28.669 | 1.00 | 0.00 | B | C |
| ATOM | 9186 | C   | ILE | B | 690 | 3.918  | 13.335 | -31.907 | 1.00 | 0.00 | B | C |
| ATOM | 9187 | O   | ILE | B | 690 | 4.608  | 14.188 | -32.462 | 1.00 | 0.00 | B | O |
| ATOM | 9188 | N   | ALA | B | 691 | 4.370  | 12.091 | -31.661 | 1.00 | 0.00 | B | N |
| ATOM | 9189 | CA  | ALA | B | 691 | 5.692  | 11.685 | -32.050 | 1.00 | 0.00 | B | C |
| ATOM | 9190 | CB  | ALA | B | 691 | 6.014  | 10.246 | -31.616 | 1.00 | 0.00 | B | C |
| ATOM | 9191 | C   | ALA | B | 691 | 5.838  | 11.751 | -33.544 | 1.00 | 0.00 | B | C |
| ATOM | 9192 | O   | ALA | B | 691 | 6.848  | 12.233 | -34.051 | 1.00 | 0.00 | B | O |
| ATOM | 9193 | N   | GLN | B | 692 | 4.830  | 11.273 | -34.303 | 1.00 | 0.00 | B | N |
| ATOM | 9194 | CA  | GLN | B | 692 | 4.938  | 11.259 | -35.739 | 1.00 | 0.00 | B | C |
| ATOM | 9195 | CB  | GLN | B | 692 | 3.676  | 10.706 | -36.410 | 1.00 | 0.00 | B | C |
| ATOM | 9196 | CG  | GLN | B | 692 | 3.291  | 9.293  | -35.990 | 1.00 | 0.00 | B | C |
| ATOM | 9197 | CD  | GLN | B | 692 | 1.915  | 9.059  | -36.582 | 1.00 | 0.00 | B | C |
| ATOM | 9198 | OE1 | GLN | B | 692 | 1.687  | 9.366  | -37.750 | 1.00 | 0.00 | B | O |
| ATOM | 9199 | NE2 | GLN | B | 692 | 0.967  | 8.536  | -35.758 | 1.00 | 0.00 | B | N |
| ATOM | 9200 | C   | GLN | B | 692 | 5.022  | 12.671 | -36.219 | 1.00 | 0.00 | B | C |
| ATOM | 9201 | O   | GLN | B | 692 | 5.826  | 13.015 | -37.086 | 1.00 | 0.00 | B | O |
| ATOM | 9202 | N   | GLU | B | 693 | 4.158  | 13.517 | -35.640 | 1.00 | 0.00 | B | N |
| ATOM | 9203 | CA  | GLU | B | 693 | 3.999  | 14.903 | -35.958 | 1.00 | 0.00 | B | C |
| ATOM | 9204 | CB  | GLU | B | 693 | 2.779  | 15.516 | -35.249 | 1.00 | 0.00 | B | C |
| ATOM | 9205 | CG  | GLU | B | 693 | 1.447  | 14.922 | -35.719 | 1.00 | 0.00 | B | C |
| ATOM | 9206 | CD  | GLU | B | 693 | 0.341  | 15.443 | -34.812 | 1.00 | 0.00 | B | C |
| ATOM | 9207 | OE1 | GLU | B | 693 | 0.179  | 14.883 | -33.692 | 1.00 | 0.00 | B | O |
| ATOM | 9208 | OE2 | GLU | B | 693 | -0.357 | 16.406 | -35.222 | 1.00 | 0.00 | B | O |
| ATOM | 9209 | C   | GLU | B | 693 | 5.202  | 15.684 | -35.536 | 1.00 | 0.00 | B | C |
| ATOM | 9210 | O   | GLU | B | 693 | 5.508  | 16.693 | -36.158 | 1.00 | 0.00 | B | O |
| ATOM | 9211 | N   | SER | B | 694 | 5.947  | 15.211 | -34.519 | 1.00 | 0.00 | B | N |
| ATOM | 9212 | CA  | SER | B | 694 | 6.985  | 15.900 | -33.793 | 1.00 | 0.00 | B | C |
| ATOM | 9213 | CB  | SER | B | 694 | 7.861  | 14.908 | -33.010 | 1.00 | 0.00 | B | C |
| ATOM | 9214 | OG  | SER | B | 694 | 7.128  | 14.337 | -31.941 | 1.00 | 0.00 | B | O |

|      |      |     |           |        |        |         |      |      |   |   |
|------|------|-----|-----------|--------|--------|---------|------|------|---|---|
| ATOM | 9215 | C   | SER B 694 | 7.932  | 16.662 | -34.653 | 1.00 | 0.00 | B | C |
| ATOM | 9216 | O   | SER B 694 | 8.266  | 17.794 | -34.308 | 1.00 | 0.00 | B | O |
| ATOM | 9217 | N   | LYS B 695 | 8.424  | 16.081 | -35.757 | 1.00 | 0.00 | B | N |
| ATOM | 9218 | CA  | LYS B 695 | 9.342  | 16.851 | -36.544 | 1.00 | 0.00 | B | C |
| ATOM | 9219 | CB  | LYS B 695 | 9.756  | 16.131 | -37.837 | 1.00 | 0.00 | B | C |
| ATOM | 9220 | CG  | LYS B 695 | 10.748 | 14.985 | -37.652 | 1.00 | 0.00 | B | C |
| ATOM | 9221 | CD  | LYS B 695 | 12.127 | 15.455 | -37.194 | 1.00 | 0.00 | B | C |
| ATOM | 9222 | CE  | LYS B 695 | 13.212 | 14.390 | -37.352 | 1.00 | 0.00 | B | C |
| ATOM | 9223 | NZ  | LYS B 695 | 14.542 | 15.008 | -37.168 | 1.00 | 0.00 | B | N |
| ATOM | 9224 | C   | LYS B 695 | 8.607  | 18.082 | -36.977 | 1.00 | 0.00 | B | C |
| ATOM | 9225 | O   | LYS B 695 | 9.078  | 19.205 | -36.801 | 1.00 | 0.00 | B | O |
| ATOM | 9226 | N   | ASN B 696 | 7.389  | 17.866 | -37.494 | 1.00 | 0.00 | B | N |
| ATOM | 9227 | CA  | ASN B 696 | 6.496  | 18.861 | -38.017 | 1.00 | 0.00 | B | C |
| ATOM | 9228 | CB  | ASN B 696 | 5.244  | 18.220 | -38.637 | 1.00 | 0.00 | B | C |
| ATOM | 9229 | CG  | ASN B 696 | 5.692  | 17.184 | -39.657 | 1.00 | 0.00 | B | C |
| ATOM | 9230 | OD1 | ASN B 696 | 6.586  | 17.426 | -40.466 | 1.00 | 0.00 | B | O |
| ATOM | 9231 | ND2 | ASN B 696 | 5.065  | 15.978 | -39.601 | 1.00 | 0.00 | B | N |
| ATOM | 9232 | C   | ASN B 696 | 5.991  | 19.806 | -36.960 | 1.00 | 0.00 | B | C |
| ATOM | 9233 | O   | ASN B 696 | 6.011  | 21.020 | -37.146 | 1.00 | 0.00 | B | O |
| ATOM | 9234 | N   | ILE B 697 | 5.506  | 19.266 | -35.824 | 1.00 | 0.00 | B | N |
| ATOM | 9235 | CA  | ILE B 697 | 4.927  | 20.039 | -34.762 | 1.00 | 0.00 | B | C |
| ATOM | 9236 | CB  | ILE B 697 | 4.378  | 19.182 | -33.665 | 1.00 | 0.00 | B | C |
| ATOM | 9237 | CG2 | ILE B 697 | 3.204  | 18.352 | -34.217 | 1.00 | 0.00 | B | C |
| ATOM | 9238 | CG1 | ILE B 697 | 5.512  | 18.341 | -33.076 | 1.00 | 0.00 | B | C |
| ATOM | 9239 | CD  | ILE B 697 | 5.129  | 17.607 | -31.808 | 1.00 | 0.00 | B | C |
| ATOM | 9240 | C   | ILE B 697 | 5.981  | 20.926 | -34.194 | 1.00 | 0.00 | B | C |
| ATOM | 9241 | O   | ILE B 697 | 5.742  | 22.099 | -33.913 | 1.00 | 0.00 | B | O |
| ATOM | 9242 | N   | TRP B 698 | 7.196  | 20.376 | -34.044 | 1.00 | 0.00 | B | N |
| ATOM | 9243 | CA  | TRP B 698 | 8.297  | 21.111 | -33.519 | 1.00 | 0.00 | B | C |
| ATOM | 9244 | CB  | TRP B 698 | 9.604  | 20.313 | -33.636 | 1.00 | 0.00 | B | C |
| ATOM | 9245 | CG  | TRP B 698 | 10.867 | 21.131 | -33.524 | 1.00 | 0.00 | B | C |
| ATOM | 9246 | CD1 | TRP B 698 | 11.526 | 21.573 | -32.422 | 1.00 | 0.00 | B | C |
| ATOM | 9247 | NE1 | TRP B 698 | 12.667 | 22.243 | -32.790 | 1.00 | 0.00 | B | N |
| ATOM | 9248 | CE2 | TRP B 698 | 12.747 | 22.250 | -34.165 | 1.00 | 0.00 | B | C |
| ATOM | 9249 | CD2 | TRP B 698 | 11.635 | 21.567 | -34.657 | 1.00 | 0.00 | B | C |
| ATOM | 9250 | CE3 | TRP B 698 | 11.437 | 21.409 | -35.998 | 1.00 | 0.00 | B | C |
| ATOM | 9251 | CZ3 | TRP B 698 | 12.376 | 21.953 | -36.845 | 1.00 | 0.00 | B | C |
| ATOM | 9252 | CZ2 | TRP B 698 | 13.679 | 22.785 | -35.005 | 1.00 | 0.00 | B | C |



|      |      |               |        |        |         |      |      |   |   |
|------|------|---------------|--------|--------|---------|------|------|---|---|
| ATOM | 9253 | CH2 TRP B 698 | 13.475 | 22.626 | -36.357 | 1.00 | 0.00 | B | C |
| ATOM | 9254 | C TRP B 698   | 8.463  | 22.298 | -34.395 | 1.00 | 0.00 | B | C |
| ATOM | 9255 | O TRP B 698   | 8.687  | 23.406 | -33.913 | 1.00 | 0.00 | B | O |
| ATOM | 9256 | N LYS B 699   | 8.362  | 22.079 | -35.715 | 1.00 | 0.00 | B | N |
| ATOM | 9257 | CA LYS B 699  | 8.629  | 23.128 | -36.650 | 1.00 | 0.00 | B | C |
| ATOM | 9258 | CB LYS B 699  | 8.709  | 22.635 | -38.107 | 1.00 | 0.00 | B | C |
| ATOM | 9259 | CG LYS B 699  | 9.630  | 23.491 | -38.988 | 1.00 | 0.00 | B | C |
| ATOM | 9260 | CD LYS B 699  | 9.323  | 24.991 | -38.997 | 1.00 | 0.00 | B | C |
| ATOM | 9261 | CE LYS B 699  | 10.368 | 25.814 | -39.758 | 1.00 | 0.00 | B | C |
| ATOM | 9262 | NZ LYS B 699  | 10.116 | 27.263 | -39.578 | 1.00 | 0.00 | B | N |
| ATOM | 9263 | C LYS B 699   | 7.614  | 24.245 | -36.597 | 1.00 | 0.00 | B | C |
| ATOM | 9264 | O LYS B 699   | 7.997  | 25.413 | -36.611 | 1.00 | 0.00 | B | O |
| ATOM | 9265 | N LEU B 700   | 6.299  | 23.940 | -36.537 | 1.00 | 0.00 | B | N |
| ATOM | 9266 | CA LEU B 700  | 5.297  | 24.978 | -36.638 | 1.00 | 0.00 | B | C |
| ATOM | 9267 | CB LEU B 700  | 3.869  | 24.432 | -36.862 | 1.00 | 0.00 | B | C |
| ATOM | 9268 | CG LEU B 700  | 3.175  | 23.743 | -35.666 | 1.00 | 0.00 | B | C |
| ATOM | 9269 | CD1 LEU B 700 | 2.683  | 24.748 | -34.610 | 1.00 | 0.00 | B | C |
| ATOM | 9270 | CD2 LEU B 700 | 2.046  | 22.824 | -36.154 | 1.00 | 0.00 | B | C |
| ATOM | 9271 | C LEU B 700   | 5.295  | 25.915 | -35.468 | 1.00 | 0.00 | B | C |
| ATOM | 9272 | O LEU B 700   | 5.203  | 27.133 | -35.644 | 1.00 | 0.00 | B | O |
| ATOM | 9273 | N GLN B 701   | 5.400  | 25.367 | -34.244 | 1.00 | 0.00 | B | N |
| ATOM | 9274 | CA GLN B 701  | 5.351  | 26.095 | -33.003 | 1.00 | 0.00 | B | C |
| ATOM | 9275 | CB GLN B 701  | 5.294  | 25.189 | -31.769 | 1.00 | 0.00 | B | C |
| ATOM | 9276 | CG GLN B 701  | 6.528  | 24.317 | -31.569 | 1.00 | 0.00 | B | C |
| ATOM | 9277 | CD GLN B 701  | 6.268  | 23.508 | -30.311 | 1.00 | 0.00 | B | C |
| ATOM | 9278 | OE1 GLN B 701 | 5.202  | 23.630 | -29.706 | 1.00 | 0.00 | B | O |
| ATOM | 9279 | NE2 GLN B 701 | 7.248  | 22.662 | -29.902 | 1.00 | 0.00 | B | N |
| ATOM | 9280 | C GLN B 701   | 6.542  | 26.985 | -32.893 | 1.00 | 0.00 | B | C |
| ATOM | 9281 | O GLN B 701   | 6.463  | 28.076 | -32.329 | 1.00 | 0.00 | B | O |
| ATOM | 9282 | N ARG B 702   | 7.696  | 26.532 | -33.402 | 1.00 | 0.00 | B | N |
| ATOM | 9283 | CA ARG B 702  | 8.861  | 27.353 | -33.302 | 1.00 | 0.00 | B | C |
| ATOM | 9284 | CB ARG B 702  | 10.129 | 26.660 | -33.841 | 1.00 | 0.00 | B | C |
| ATOM | 9285 | CG ARG B 702  | 11.399 | 27.503 | -33.700 | 1.00 | 0.00 | B | C |
| ATOM | 9286 | CD ARG B 702  | 12.685 | 26.680 | -33.587 | 1.00 | 0.00 | B | C |
| ATOM | 9287 | NE ARG B 702  | 13.069 | 26.171 | -34.933 | 1.00 | 0.00 | B | N |
| ATOM | 9288 | CZ ARG B 702  | 14.321 | 25.659 | -35.106 | 1.00 | 0.00 | B | C |
| ATOM | 9289 | NH1 ARG B 702 | 15.181 | 25.600 | -34.045 | 1.00 | 0.00 | B | N |
| ATOM | 9290 | NH2 ARG B 702 | 14.717 | 25.195 | -36.323 | 1.00 | 0.00 | B | N |

|      |      |     |           |        |        |         |      |      |   |   |
|------|------|-----|-----------|--------|--------|---------|------|------|---|---|
| ATOM | 9291 | C   | ARG B 702 | 8.596  | 28.613 | -34.071 | 1.00 | 0.00 | B | C |
| ATOM | 9292 | O   | ARG B 702 | 8.889  | 29.707 | -33.596 | 1.00 | 0.00 | B | O |
| ATOM | 9293 | N   | ALA B 703 | 7.971  | 28.502 | -35.256 | 1.00 | 0.00 | B | N |
| ATOM | 9294 | CA  | ALA B 703 | 7.727  | 29.659 | -36.070 | 1.00 | 0.00 | B | C |
| ATOM | 9295 | CB  | ALA B 703 | 6.989  | 29.337 | -37.379 | 1.00 | 0.00 | B | C |
| ATOM | 9296 | C   | ALA B 703 | 6.873  | 30.614 | -35.303 | 1.00 | 0.00 | B | C |
| ATOM | 9297 | O   | ALA B 703 | 7.066  | 31.827 | -35.367 | 1.00 | 0.00 | B | O |
| ATOM | 9298 | N   | ILE B 704 | 5.886  | 30.089 | -34.558 | 1.00 | 0.00 | B | N |
| ATOM | 9299 | CA  | ILE B 704 | 5.020  | 30.941 | -33.800 | 1.00 | 0.00 | B | C |
| ATOM | 9300 | CB  | ILE B 704 | 3.951  | 30.189 | -33.063 | 1.00 | 0.00 | B | C |
| ATOM | 9301 | CG2 | ILE B 704 | 3.231  | 31.176 | -32.131 | 1.00 | 0.00 | B | C |
| ATOM | 9302 | CG1 | ILE B 704 | 3.011  | 29.481 | -34.051 | 1.00 | 0.00 | B | C |
| ATOM | 9303 | CD  | ILE B 704 | 2.062  | 28.492 | -33.376 | 1.00 | 0.00 | B | C |
| ATOM | 9304 | C   | ILE B 704 | 5.833  | 31.664 | -32.773 | 1.00 | 0.00 | B | C |
| ATOM | 9305 | O   | ILE B 704 | 5.643  | 32.859 | -32.557 | 1.00 | 0.00 | B | O |
| ATOM | 9306 | N   | THR B 705 | 6.767  | 30.958 | -32.105 | 1.00 | 0.00 | B | N |
| ATOM | 9307 | CA  | THR B 705 | 7.510  | 31.599 | -31.059 | 1.00 | 0.00 | B | C |
| ATOM | 9308 | CB  | THR B 705 | 8.419  | 30.685 | -30.282 | 1.00 | 0.00 | B | C |
| ATOM | 9309 | OG1 | THR B 705 | 8.761  | 31.299 | -29.048 | 1.00 | 0.00 | B | O |
| ATOM | 9310 | CG2 | THR B 705 | 9.704  | 30.419 | -31.082 | 1.00 | 0.00 | B | C |
| ATOM | 9311 | C   | THR B 705 | 8.329  | 32.703 | -31.651 | 1.00 | 0.00 | B | C |
| ATOM | 9312 | O   | THR B 705 | 8.462  | 33.767 | -31.052 | 1.00 | 0.00 | B | O |
| ATOM | 9313 | N   | ILE B 706 | 8.908  | 32.473 | -32.844 | 1.00 | 0.00 | B | N |
| ATOM | 9314 | CA  | ILE B 706 | 9.733  | 33.468 | -33.466 | 1.00 | 0.00 | B | C |
| ATOM | 9315 | CB  | ILE B 706 | 10.423 | 32.962 | -34.697 | 1.00 | 0.00 | B | C |
| ATOM | 9316 | CG2 | ILE B 706 | 11.059 | 34.161 | -35.417 | 1.00 | 0.00 | B | C |
| ATOM | 9317 | CG1 | ILE B 706 | 11.421 | 31.851 | -34.320 | 1.00 | 0.00 | B | C |
| ATOM | 9318 | CD  | ILE B 706 | 12.008 | 31.104 | -35.516 | 1.00 | 0.00 | B | C |
| ATOM | 9319 | C   | ILE B 706 | 8.923  | 34.668 | -33.843 | 1.00 | 0.00 | B | C |
| ATOM | 9320 | O   | ILE B 706 | 9.335  | 35.802 | -33.617 | 1.00 | 0.00 | B | O |
| ATOM | 9321 | N   | LEU B 707 | 7.734  | 34.458 | -34.437 | 1.00 | 0.00 | B | N |
| ATOM | 9322 | CA  | LEU B 707 | 6.980  | 35.578 | -34.918 | 1.00 | 0.00 | B | C |
| ATOM | 9323 | CB  | LEU B 707 | 5.902  | 35.162 | -35.928 | 1.00 | 0.00 | B | C |
| ATOM | 9324 | CG  | LEU B 707 | 6.637  | 34.534 | -37.134 | 1.00 | 0.00 | B | C |
| ATOM | 9325 | CD1 | LEU B 707 | 5.761  | 34.382 | -38.384 | 1.00 | 0.00 | B | C |
| ATOM | 9326 | CD2 | LEU B 707 | 7.947  | 35.292 | -37.404 | 1.00 | 0.00 | B | C |
| ATOM | 9327 | C   | LEU B 707 | 6.482  | 36.445 | -33.798 | 1.00 | 0.00 | B | C |
| ATOM | 9328 | O   | LEU B 707 | 6.475  | 37.668 | -33.920 | 1.00 | 0.00 | B | O |

|      |      |     |           |        |        |         |      |      |   |   |
|------|------|-----|-----------|--------|--------|---------|------|------|---|---|
| ATOM | 9329 | N   | ASP B 708 | 6.071  | 35.850 | -32.663 | 1.00 | 0.00 | B | N |
| ATOM | 9330 | CA  | ASP B 708 | 5.582  | 36.647 | -31.570 | 1.00 | 0.00 | B | C |
| ATOM | 9331 | CB  | ASP B 708 | 5.130  | 35.789 | -30.375 | 1.00 | 0.00 | B | C |
| ATOM | 9332 | CG  | ASP B 708 | 3.890  | 35.000 | -30.780 | 1.00 | 0.00 | B | C |
| ATOM | 9333 | OD1 | ASP B 708 | 3.343  | 35.278 | -31.880 | 1.00 | 0.00 | B | O |
| ATOM | 9334 | OD2 | ASP B 708 | 3.471  | 34.113 | -29.989 | 1.00 | 0.00 | B | O |
| ATOM | 9335 | C   | ASP B 708 | 6.684  | 37.539 | -31.087 | 1.00 | 0.00 | B | C |
| ATOM | 9336 | O   | ASP B 708 | 6.473  | 38.727 | -30.845 | 1.00 | 0.00 | B | O |
| ATOM | 9337 | N   | THR B 709 | 7.908  | 36.992 | -30.948 | 1.00 | 0.00 | B | N |
| ATOM | 9338 | CA  | THR B 709 | 8.988  | 37.791 | -30.439 | 1.00 | 0.00 | B | C |
| ATOM | 9339 | CB  | THR B 709 | 10.259 | 37.026 | -30.192 | 1.00 | 0.00 | B | C |
| ATOM | 9340 | OG1 | THR B 709 | 11.162 | 37.826 | -29.439 | 1.00 | 0.00 | B | O |
| ATOM | 9341 | CG2 | THR B 709 | 10.901 | 36.648 | -31.535 | 1.00 | 0.00 | B | C |
| ATOM | 9342 | C   | THR B 709 | 9.281  | 38.881 | -31.420 | 1.00 | 0.00 | B | C |
| ATOM | 9343 | O   | THR B 709 | 9.551  | 40.014 | -31.030 | 1.00 | 0.00 | B | O |
| ATOM | 9344 | N   | GLU B 710 | 9.214  | 38.574 | -32.730 | 1.00 | 0.00 | B | N |
| ATOM | 9345 | CA  | GLU B 710 | 9.541  | 39.569 | -33.709 | 1.00 | 0.00 | B | C |
| ATOM | 9346 | CB  | GLU B 710 | 9.394  | 39.089 | -35.164 | 1.00 | 0.00 | B | C |
| ATOM | 9347 | CG  | GLU B 710 | 9.754  | 40.181 | -36.180 | 1.00 | 0.00 | B | C |
| ATOM | 9348 | CD  | GLU B 710 | 9.328  | 39.732 | -37.571 | 1.00 | 0.00 | B | C |
| ATOM | 9349 | OE1 | GLU B 710 | 8.690  | 38.652 | -37.678 | 1.00 | 0.00 | B | O |
| ATOM | 9350 | OE2 | GLU B 710 | 9.629  | 40.470 | -38.549 | 1.00 | 0.00 | B | O |
| ATOM | 9351 | C   | GLU B 710 | 8.612  | 40.727 | -33.553 | 1.00 | 0.00 | B | C |
| ATOM | 9352 | O   | GLU B 710 | 9.049  | 41.877 | -33.588 | 1.00 | 0.00 | B | O |
| ATOM | 9353 | N   | LYS B 711 | 7.300  | 40.467 | -33.384 | 1.00 | 0.00 | B | N |
| ATOM | 9354 | CA  | LYS B 711 | 6.369  | 41.555 | -33.262 | 1.00 | 0.00 | B | C |
| ATOM | 9355 | CB  | LYS B 711 | 4.898  | 41.111 | -33.245 | 1.00 | 0.00 | B | C |
| ATOM | 9356 | CG  | LYS B 711 | 4.366  | 40.695 | -34.619 | 1.00 | 0.00 | B | C |
| ATOM | 9357 | CD  | LYS B 711 | 4.411  | 41.817 | -35.662 | 1.00 | 0.00 | B | C |
| ATOM | 9358 | CE  | LYS B 711 | 5.462  | 41.607 | -36.755 | 1.00 | 0.00 | B | C |
| ATOM | 9359 | NZ  | LYS B 711 | 6.816  | 41.549 | -36.162 | 1.00 | 0.00 | B | N |
| ATOM | 9360 | C   | LYS B 711 | 6.624  | 42.337 | -31.999 | 1.00 | 0.00 | B | C |
| ATOM | 9361 | O   | LYS B 711 | 6.583  | 43.565 | -32.016 | 1.00 | 0.00 | B | O |
| ATOM | 9362 | N   | SER B 712 | 6.875  | 41.640 | -30.871 | 1.00 | 0.00 | B | N |
| ATOM | 9363 | CA  | SER B 712 | 7.071  | 42.235 | -29.568 | 1.00 | 0.00 | B | C |
| ATOM | 9364 | CB  | SER B 712 | 6.875  | 41.218 | -28.429 | 1.00 | 0.00 | B | C |
| ATOM | 9365 | OG  | SER B 712 | 7.061  | 41.852 | -27.171 | 1.00 | 0.00 | B | O |
| ATOM | 9366 | C   | SER B 712 | 8.448  | 42.815 | -29.427 | 1.00 | 0.00 | B | C |

|      |      |     |     |   |     |        |        |         |      |      |   |   |
|------|------|-----|-----|---|-----|--------|--------|---------|------|------|---|---|
| ATOM | 9367 | O   | SER | B | 712 | 8.757  | 43.470 | -28.434 | 1.00 | 0.00 | B | O |
| ATOM | 9368 | N   | PHE | B | 713 | 9.310  | 42.596 | -30.429 | 1.00 | 0.00 | B | N |
| ATOM | 9369 | CA  | PHE | B | 713 | 10.689 | 43.000 | -30.427 | 1.00 | 0.00 | B | C |
| ATOM | 9370 | CB  | PHE | B | 713 | 11.504 | 42.406 | -31.585 | 1.00 | 0.00 | B | C |
| ATOM | 9371 | CG  | PHE | B | 713 | 12.936 | 42.646 | -31.252 | 1.00 | 0.00 | B | C |
| ATOM | 9372 | CD1 | PHE | B | 713 | 13.545 | 41.883 | -30.280 | 1.00 | 0.00 | B | C |
| ATOM | 9373 | CE1 | PHE | B | 713 | 14.865 | 42.080 | -29.953 | 1.00 | 0.00 | B | C |
| ATOM | 9374 | CZ  | PHE | B | 713 | 15.591 | 43.048 | -30.602 | 1.00 | 0.00 | B | C |
| ATOM | 9375 | CD2 | PHE | B | 713 | 13.672 | 43.610 | -31.901 | 1.00 | 0.00 | B | C |
| ATOM | 9376 | CE2 | PHE | B | 713 | 14.993 | 43.811 | -31.577 | 1.00 | 0.00 | B | C |
| ATOM | 9377 | C   | PHE | B | 713 | 10.785 | 44.495 | -30.501 | 1.00 | 0.00 | B | C |
| ATOM | 9378 | O   | PHE | B | 713 | 11.869 | 45.053 | -30.329 | 1.00 | 0.00 | B | O |
| ATOM | 9379 | N   | LEU | B | 714 | 9.657  | 45.179 | -30.774 | 1.00 | 0.00 | B | N |
| ATOM | 9380 | CA  | LEU | B | 714 | 9.619  | 46.588 | -31.056 | 1.00 | 0.00 | B | C |
| ATOM | 9381 | CB  | LEU | B | 714 | 10.587 | 47.472 | -30.241 | 1.00 | 0.00 | B | C |
| ATOM | 9382 | CG  | LEU | B | 714 | 10.155 | 47.752 | -28.789 | 1.00 | 0.00 | B | C |
| ATOM | 9383 | CD1 | LEU | B | 714 | 8.855  | 48.572 | -28.756 | 1.00 | 0.00 | B | C |
| ATOM | 9384 | CD2 | LEU | B | 714 | 10.088 | 46.473 | -27.943 | 1.00 | 0.00 | B | C |
| ATOM | 9385 | C   | LEU | B | 714 | 9.959  | 46.770 | -32.487 | 1.00 | 0.00 | B | C |
| ATOM | 9386 | O   | LEU | B | 714 | 10.199 | 47.889 | -32.937 | 1.00 | 0.00 | B | O |
| ATOM | 9387 | N   | LYS | B | 715 | 9.951  | 45.652 | -33.239 | 1.00 | 0.00 | B | N |
| ATOM | 9388 | CA  | LYS | B | 715 | 10.119 | 45.736 | -34.656 | 1.00 | 0.00 | B | C |
| ATOM | 9389 | CB  | LYS | B | 715 | 8.997  | 46.588 | -35.260 | 1.00 | 0.00 | B | C |
| ATOM | 9390 | CG  | LYS | B | 715 | 7.626  | 46.101 | -34.787 | 1.00 | 0.00 | B | C |
| ATOM | 9391 | CD  | LYS | B | 715 | 6.539  | 47.176 | -34.831 | 1.00 | 0.00 | B | C |
| ATOM | 9392 | CE  | LYS | B | 715 | 5.321  | 46.832 | -33.970 | 1.00 | 0.00 | B | C |
| ATOM | 9393 | NZ  | LYS | B | 715 | 4.508  | 48.045 | -33.732 | 1.00 | 0.00 | B | N |
| ATOM | 9394 | C   | LYS | B | 715 | 11.421 | 46.411 | -34.885 | 1.00 | 0.00 | B | C |
| ATOM | 9395 | O   | LYS | B | 715 | 11.573 | 47.211 | -35.807 | 1.00 | 0.00 | B | O |
| ATOM | 9396 | N   | CYS | B | 716 | 12.409 | 46.084 | -34.035 | 1.00 | 0.00 | B | N |
| ATOM | 9397 | CA  | CYS | B | 716 | 13.684 | 46.711 | -34.157 | 1.00 | 0.00 | B | C |
| ATOM | 9398 | CB  | CYS | B | 716 | 14.675 | 46.349 | -33.040 | 1.00 | 0.00 | B | C |
| ATOM | 9399 | SG  | CYS | B | 716 | 14.151 | 46.961 | -31.411 | 1.00 | 0.00 | B | S |
| ATOM | 9400 | C   | CYS | B | 716 | 14.261 | 46.260 | -35.455 | 1.00 | 0.00 | B | C |
| ATOM | 9401 | O   | CYS | B | 716 | 13.703 | 45.384 | -36.114 | 1.00 | 0.00 | B | O |
| ATOM | 9402 | N   | MET | B | 717 | 15.384 | 46.880 | -35.863 | 1.00 | 0.00 | B | N |
| ATOM | 9403 | CA  | MET | B | 717 | 15.976 | 46.553 | -37.127 | 1.00 | 0.00 | B | C |
| ATOM | 9404 | CB  | MET | B | 717 | 17.349 | 47.201 | -37.369 | 1.00 | 0.00 | B | C |

|      |      |     |     |   |     |        |        |         |      |      |   |   |
|------|------|-----|-----|---|-----|--------|--------|---------|------|------|---|---|
| ATOM | 9405 | CG  | MET | B | 717 | 18.028 | 46.659 | -38.631 | 1.00 | 0.00 | B | C |
| ATOM | 9406 | SD  | MET | B | 717 | 19.764 | 47.149 | -38.844 | 1.00 | 0.00 | B | S |
| ATOM | 9407 | CE  | MET | B | 717 | 20.063 | 46.023 | -40.239 | 1.00 | 0.00 | B | C |
| ATOM | 9408 | C   | MET | B | 717 | 16.221 | 45.087 | -37.160 | 1.00 | 0.00 | B | C |
| ATOM | 9409 | O   | MET | B | 717 | 16.763 | 44.510 | -36.220 | 1.00 | 0.00 | B | O |
| ATOM | 9410 | N   | ARG | B | 718 | 15.799 | 44.453 | -38.269 | 1.00 | 0.00 | B | N |
| ATOM | 9411 | CA  | ARG | B | 718 | 15.990 | 43.050 | -38.468 | 1.00 | 0.00 | B | C |
| ATOM | 9412 | CB  | ARG | B | 718 | 15.004 | 42.201 | -37.649 | 1.00 | 0.00 | B | C |
| ATOM | 9413 | CG  | ARG | B | 718 | 15.151 | 40.691 | -37.823 | 1.00 | 0.00 | B | C |
| ATOM | 9414 | CD  | ARG | B | 718 | 14.157 | 39.912 | -36.961 | 1.00 | 0.00 | B | C |
| ATOM | 9415 | NE  | ARG | B | 718 | 14.578 | 40.089 | -35.541 | 1.00 | 0.00 | B | N |
| ATOM | 9416 | CZ  | ARG | B | 718 | 13.663 | 39.950 | -34.538 | 1.00 | 0.00 | B | C |
| ATOM | 9417 | NH1 | ARG | B | 718 | 12.359 | 39.675 | -34.839 | 1.00 | 0.00 | B | N |
| ATOM | 9418 | NH2 | ARG | B | 718 | 14.053 | 40.068 | -33.235 | 1.00 | 0.00 | B | N |
| ATOM | 9419 | C   | ARG | B | 718 | 15.718 | 42.805 | -39.913 | 1.00 | 0.00 | B | C |
| ATOM | 9420 | O   | ARG | B | 718 | 15.032 | 43.599 | -40.554 | 1.00 | 0.00 | B | O |
| ATOM | 9421 | C   | LYS | B | 719 | 14.672 | 40.622 | -41.872 | 1.00 | 0.00 | B | C |
| ATOM | 9422 | OT1 | LYS | B | 719 | 14.435 | 40.385 | -40.930 | 0.00 | 0.00 | B | O |
| ATOM | 9423 | OT2 | LYS | B | 719 | 14.387 | 40.470 | -42.818 | 0.00 | 0.00 | B | O |
| ATOM | 9424 | N   | LYS | B | 719 | 16.263 | 41.717 | -40.493 | 1.00 | 0.00 | B | N |
| ATOM | 9425 | CA  | LYS | B | 719 | 15.891 | 41.528 | -41.862 | 1.00 | 0.00 | B | C |
| ATOM | 9426 | CB  | LYS | B | 719 | 16.928 | 40.879 | -42.785 | 1.00 | 0.00 | B | C |
| ATOM | 9427 | CG  | LYS | B | 719 | 16.338 | 40.768 | -44.195 | 1.00 | 0.00 | B | C |
| ATOM | 9428 | CD  | LYS | B | 719 | 16.015 | 42.137 | -44.804 | 1.00 | 0.00 | B | C |
| ATOM | 9429 | CE  | LYS | B | 719 | 14.744 | 42.161 | -45.663 | 1.00 | 0.00 | B | C |
| ATOM | 9430 | NZ  | LYS | B | 719 | 14.864 | 41.218 | -46.796 | 1.00 | 0.00 | B | N |
| ATOM | 9431 | N   | LEU | A | 112 | 35.654 | 51.645 | -77.920 | 1.00 | 0.00 | C | N |
| ATOM | 9432 | CA  | LEU | A | 112 | 34.288 | 51.564 | -78.448 | 1.00 | 0.00 | C | C |
| ATOM | 9433 | CB  | LEU | A | 112 | 34.322 | 51.059 | -79.900 | 1.00 | 0.00 | C | C |
| ATOM | 9434 | CG  | LEU | A | 112 | 35.108 | 51.982 | -80.856 | 1.00 | 0.00 | C | C |
| ATOM | 9435 | CD1 | LEU | A | 112 | 35.073 | 51.461 | -82.303 | 1.00 | 0.00 | C | C |
| ATOM | 9436 | CD2 | LEU | A | 112 | 34.641 | 53.440 | -80.737 | 1.00 | 0.00 | C | C |
| ATOM | 9437 | C   | LEU | A | 112 | 33.509 | 50.585 | -77.638 | 1.00 | 0.00 | C | C |
| ATOM | 9438 | O   | LEU | A | 112 | 32.300 | 50.444 | -77.811 | 1.00 | 0.00 | C | O |
| ATOM | 9439 | N   | TYR | A | 113 | 34.195 | 49.870 | -76.723 | 1.00 | 0.00 | C | N |
| ATOM | 9440 | CA  | TYR | A | 113 | 33.498 | 48.883 | -75.959 | 1.00 | 0.00 | C | C |
| ATOM | 9441 | CB  | TYR | A | 113 | 33.904 | 47.445 | -76.325 | 1.00 | 0.00 | C | C |
| ATOM | 9442 | CG  | TYR | A | 113 | 33.419 | 47.140 | -77.698 | 1.00 | 0.00 | C | C |

|      |      |               |        |        |         |      |      |   |   |
|------|------|---------------|--------|--------|---------|------|------|---|---|
| ATOM | 9443 | CD1 TYR A 113 | 34.081 | 47.629 | -78.799 | 1.00 | 0.00 | C | C |
| ATOM | 9444 | CE1 TYR A 113 | 33.632 | 47.340 | -80.065 | 1.00 | 0.00 | C | C |
| ATOM | 9445 | CZ TYR A 113  | 32.515 | 46.554 | -80.236 | 1.00 | 0.00 | C | C |
| ATOM | 9446 | OH TYR A 113  | 32.050 | 46.256 | -81.533 | 1.00 | 0.00 | C | O |
| ATOM | 9447 | CD2 TYR A 113 | 32.305 | 46.352 | -77.880 | 1.00 | 0.00 | C | C |
| ATOM | 9448 | CE2 TYR A 113 | 31.851 | 46.058 | -79.142 | 1.00 | 0.00 | C | C |
| ATOM | 9449 | C TYR A 113   | 33.819 | 49.022 | -74.508 | 1.00 | 0.00 | C | C |
| ATOM | 9450 | O TYR A 113   | 34.984 | 49.113 | -74.120 | 1.00 | 0.00 | C | O |
| ATOM | 9451 | N ASP A 114   | 32.765 | 49.067 | -73.673 | 1.00 | 0.00 | C | N |
| ATOM | 9452 | CA ASP A 114  | 32.914 | 49.004 | -72.250 | 1.00 | 0.00 | C | C |
| ATOM | 9453 | CB ASP A 114  | 32.112 | 50.081 | -71.500 | 1.00 | 0.00 | C | C |
| ATOM | 9454 | CG ASP A 114  | 30.652 | 49.960 | -71.893 | 1.00 | 0.00 | C | C |
| ATOM | 9455 | OD1 ASP A 114 | 30.355 | 50.110 | -73.112 | 1.00 | 0.00 | C | O |
| ATOM | 9456 | OD2 ASP A 114 | 29.810 | 49.730 | -70.987 | 1.00 | 0.00 | C | O |
| ATOM | 9457 | C ASP A 114   | 32.460 | 47.630 | -71.846 | 1.00 | 0.00 | C | C |
| ATOM | 9458 | O ASP A 114   | 31.993 | 46.855 | -72.679 | 1.00 | 0.00 | C | O |
| ATOM | 9459 | N ARG A 115   | 32.584 | 47.281 | -70.552 | 1.00 | 0.00 | C | N |
| ATOM | 9460 | CA ARG A 115  | 32.213 | 45.964 | -70.107 | 1.00 | 0.00 | C | C |
| ATOM | 9461 | CB ARG A 115  | 32.493 | 45.755 | -68.608 | 1.00 | 0.00 | C | C |
| ATOM | 9462 | CG ARG A 115  | 32.120 | 44.368 | -68.078 | 1.00 | 0.00 | C | C |
| ATOM | 9463 | CD ARG A 115  | 32.507 | 44.166 | -66.611 | 1.00 | 0.00 | C | C |
| ATOM | 9464 | NE ARG A 115  | 31.518 | 44.899 | -65.768 | 1.00 | 0.00 | C | N |
| ATOM | 9465 | CZ ARG A 115  | 30.408 | 44.254 | -65.304 | 1.00 | 0.00 | C | C |
| ATOM | 9466 | NH1 ARG A 115 | 30.218 | 42.936 | -65.592 | 1.00 | 0.00 | C | N |
| ATOM | 9467 | NH2 ARG A 115 | 29.493 | 44.927 | -64.545 | 1.00 | 0.00 | C | N |
| ATOM | 9468 | C ARG A 115   | 30.744 | 45.771 | -70.333 | 1.00 | 0.00 | C | C |
| ATOM | 9469 | O ARG A 115   | 30.307 | 44.713 | -70.785 | 1.00 | 0.00 | C | O |
| ATOM | 9470 | N ARG A 116   | 29.955 | 46.818 | -70.051 | 1.00 | 0.00 | C | N |
| ATOM | 9471 | CA ARG A 116  | 28.524 | 46.755 | -70.100 | 1.00 | 0.00 | C | C |
| ATOM | 9472 | CB ARG A 116  | 27.897 | 48.103 | -69.708 | 1.00 | 0.00 | C | C |
| ATOM | 9473 | CG ARG A 116  | 26.529 | 47.976 | -69.042 | 1.00 | 0.00 | C | C |
| ATOM | 9474 | CD ARG A 116  | 25.478 | 47.214 | -69.842 | 1.00 | 0.00 | C | C |
| ATOM | 9475 | NE ARG A 116  | 24.369 | 46.942 | -68.886 | 1.00 | 0.00 | C | N |
| ATOM | 9476 | CZ ARG A 116  | 24.435 | 45.841 | -68.079 | 1.00 | 0.00 | C | C |
| ATOM | 9477 | NH1 ARG A 116 | 25.456 | 44.951 | -68.222 | 1.00 | 0.00 | C | N |
| ATOM | 9478 | NH2 ARG A 116 | 23.481 | 45.638 | -67.122 | 1.00 | 0.00 | C | N |
| ATOM | 9479 | C ARG A 116   | 28.081 | 46.444 | -71.498 | 1.00 | 0.00 | C | C |
| ATOM | 9480 | O ARG A 116   | 27.189 | 45.623 | -71.706 | 1.00 | 0.00 | C | O |

|      |      |     |           |        |        |         |      |      |   |   |
|------|------|-----|-----------|--------|--------|---------|------|------|---|---|
| ATOM | 9481 | N   | SER A 117 | 28.714 | 47.080 | -72.502 | 1.00 | 0.00 | C | N |
| ATOM | 9482 | CA  | SER A 117 | 28.278 | 46.943 | -73.863 | 1.00 | 0.00 | C | C |
| ATOM | 9483 | CB  | SER A 117 | 29.105 | 47.795 | -74.843 | 1.00 | 0.00 | C | C |
| ATOM | 9484 | OG  | SER A 117 | 30.468 | 47.395 | -74.820 | 1.00 | 0.00 | C | O |
| ATOM | 9485 | C   | SER A 117 | 28.339 | 45.512 | -74.316 | 1.00 | 0.00 | C | C |
| ATOM | 9486 | O   | SER A 117 | 27.382 | 45.014 | -74.905 | 1.00 | 0.00 | C | O |
| ATOM | 9487 | N   | ILE A 118 | 29.460 | 44.811 | -74.060 | 1.00 | 0.00 | C | N |
| ATOM | 9488 | CA  | ILE A 118 | 29.628 | 43.454 | -74.513 | 1.00 | 0.00 | C | C |
| ATOM | 9489 | CB  | ILE A 118 | 31.008 | 42.915 | -74.287 | 1.00 | 0.00 | C | C |
| ATOM | 9490 | CG2 | ILE A 118 | 31.007 | 41.443 | -74.733 | 1.00 | 0.00 | C | C |
| ATOM | 9491 | CG1 | ILE A 118 | 32.052 | 43.771 | -75.021 | 1.00 | 0.00 | C | C |
| ATOM | 9492 | CD  | ILE A 118 | 33.488 | 43.456 | -74.607 | 1.00 | 0.00 | C | C |
| ATOM | 9493 | C   | ILE A 118 | 28.681 | 42.528 | -73.810 | 1.00 | 0.00 | C | C |
| ATOM | 9494 | O   | ILE A 118 | 28.096 | 41.639 | -74.428 | 1.00 | 0.00 | C | O |
| ATOM | 9495 | N   | PHE A 119 | 28.501 | 42.716 | -72.490 | 1.00 | 0.00 | C | N |
| ATOM | 9496 | CA  | PHE A 119 | 27.685 | 41.837 | -71.702 | 1.00 | 0.00 | C | C |
| ATOM | 9497 | CB  | PHE A 119 | 27.601 | 42.265 | -70.222 | 1.00 | 0.00 | C | C |
| ATOM | 9498 | CG  | PHE A 119 | 28.780 | 41.717 | -69.487 | 1.00 | 0.00 | C | C |
| ATOM | 9499 | CD1 | PHE A 119 | 30.050 | 42.190 | -69.713 | 1.00 | 0.00 | C | C |
| ATOM | 9500 | CE1 | PHE A 119 | 31.125 | 41.667 | -69.033 | 1.00 | 0.00 | C | C |
| ATOM | 9501 | CZ  | PHE A 119 | 30.945 | 40.656 | -68.121 | 1.00 | 0.00 | C | C |
| ATOM | 9502 | CD2 | PHE A 119 | 28.611 | 40.689 | -68.585 | 1.00 | 0.00 | C | C |
| ATOM | 9503 | CE2 | PHE A 119 | 29.680 | 40.163 | -67.900 | 1.00 | 0.00 | C | C |
| ATOM | 9504 | C   | PHE A 119 | 26.300 | 41.818 | -72.259 | 1.00 | 0.00 | C | C |
| ATOM | 9505 | O   | PHE A 119 | 25.674 | 40.760 | -72.319 | 1.00 | 0.00 | C | O |
| ATOM | 9506 | N   | GLU A 120 | 25.775 | 42.991 | -72.650 | 1.00 | 0.00 | C | N |
| ATOM | 9507 | CA  | GLU A 120 | 24.452 | 43.070 | -73.199 | 1.00 | 0.00 | C | C |
| ATOM | 9508 | CB  | GLU A 120 | 23.978 | 44.519 | -73.394 | 1.00 | 0.00 | C | C |
| ATOM | 9509 | CG  | GLU A 120 | 23.808 | 45.282 | -72.076 | 1.00 | 0.00 | C | C |
| ATOM | 9510 | CD  | GLU A 120 | 22.621 | 44.694 | -71.320 | 1.00 | 0.00 | C | C |
| ATOM | 9511 | OE1 | GLU A 120 | 22.474 | 43.444 | -71.331 | 1.00 | 0.00 | C | O |
| ATOM | 9512 | OE2 | GLU A 120 | 21.849 | 45.491 | -70.723 | 1.00 | 0.00 | C | O |
| ATOM | 9513 | C   | GLU A 120 | 24.411 | 42.376 | -74.528 | 1.00 | 0.00 | C | C |
| ATOM | 9514 | O   | GLU A 120 | 23.432 | 41.703 | -74.852 | 1.00 | 0.00 | C | O |
| ATOM | 9515 | N   | ALA A 121 | 25.473 | 42.518 | -75.339 | 1.00 | 0.00 | C | N |
| ATOM | 9516 | CA  | ALA A 121 | 25.486 | 41.908 | -76.641 | 1.00 | 0.00 | C | C |
| ATOM | 9517 | CB  | ALA A 121 | 26.771 | 42.212 | -77.430 | 1.00 | 0.00 | C | C |
| ATOM | 9518 | C   | ALA A 121 | 25.399 | 40.420 | -76.479 | 1.00 | 0.00 | C | C |

|      |      |     |           |        |        |         |      |      |   |   |
|------|------|-----|-----------|--------|--------|---------|------|------|---|---|
| ATOM | 9519 | O   | ALA A 121 | 24.664 | 39.750 | -77.204 | 1.00 | 0.00 | C | O |
| ATOM | 9520 | N   | VAL A 122 | 26.142 | 39.873 | -75.500 | 1.00 | 0.00 | C | N |
| ATOM | 9521 | CA  | VAL A 122 | 26.214 | 38.459 | -75.249 | 1.00 | 0.00 | C | C |
| ATOM | 9522 | CB  | VAL A 122 | 27.193 | 38.121 | -74.160 | 1.00 | 0.00 | C | C |
| ATOM | 9523 | CG1 | VAL A 122 | 27.092 | 36.621 | -73.841 | 1.00 | 0.00 | C | C |
| ATOM | 9524 | CG2 | VAL A 122 | 28.594 | 38.558 | -74.619 | 1.00 | 0.00 | C | C |
| ATOM | 9525 | C   | VAL A 122 | 24.872 | 37.928 | -74.837 | 1.00 | 0.00 | C | C |
| ATOM | 9526 | O   | VAL A 122 | 24.489 | 36.822 | -75.220 | 1.00 | 0.00 | C | O |
| ATOM | 9527 | N   | ALA A 123 | 24.106 | 38.707 | -74.051 | 1.00 | 0.00 | C | N |
| ATOM | 9528 | CA  | ALA A 123 | 22.854 | 38.226 | -73.535 | 1.00 | 0.00 | C | C |
| ATOM | 9529 | CB  | ALA A 123 | 22.124 | 39.276 | -72.680 | 1.00 | 0.00 | C | C |
| ATOM | 9530 | C   | ALA A 123 | 21.949 | 37.861 | -74.678 | 1.00 | 0.00 | C | C |
| ATOM | 9531 | O   | ALA A 123 | 21.199 | 36.890 | -74.610 | 1.00 | 0.00 | C | O |
| ATOM | 9532 | N   | GLN A 124 | 21.978 | 38.690 | -75.733 | 1.00 | 0.00 | C | N |
| ATOM | 9533 | CA  | GLN A 124 | 21.226 | 38.620 | -76.957 | 1.00 | 0.00 | C | C |
| ATOM | 9534 | CB  | GLN A 124 | 21.256 | 39.951 | -77.725 | 1.00 | 0.00 | C | C |
| ATOM | 9535 | CG  | GLN A 124 | 20.673 | 41.124 | -76.938 | 1.00 | 0.00 | C | C |
| ATOM | 9536 | CD  | GLN A 124 | 20.800 | 42.365 | -77.811 | 1.00 | 0.00 | C | C |
| ATOM | 9537 | OE1 | GLN A 124 | 19.812 | 42.884 | -78.328 | 1.00 | 0.00 | C | O |
| ATOM | 9538 | NE2 | GLN A 124 | 22.056 | 42.859 | -77.985 | 1.00 | 0.00 | C | N |
| ATOM | 9539 | C   | GLN A 124 | 21.731 | 37.568 | -77.904 | 1.00 | 0.00 | C | C |
| ATOM | 9540 | O   | GLN A 124 | 20.999 | 37.160 | -78.806 | 1.00 | 0.00 | C | O |
| ATOM | 9541 | N   | ASN A 125 | 23.001 | 37.136 | -77.775 | 1.00 | 0.00 | C | N |
| ATOM | 9542 | CA  | ASN A 125 | 23.573 | 36.241 | -78.745 | 1.00 | 0.00 | C | C |
| ATOM | 9543 | CB  | ASN A 125 | 22.705 | 34.998 | -79.007 | 1.00 | 0.00 | C | C |
| ATOM | 9544 | CG  | ASN A 125 | 23.511 | 34.020 | -79.850 | 1.00 | 0.00 | C | C |
| ATOM | 9545 | OD1 | ASN A 125 | 24.588 | 33.587 | -79.444 | 1.00 | 0.00 | C | O |
| ATOM | 9546 | ND2 | ASN A 125 | 22.984 | 33.665 | -81.051 | 1.00 | 0.00 | C | N |
| ATOM | 9547 | C   | ASN A 125 | 23.722 | 36.989 | -80.038 | 1.00 | 0.00 | C | C |
| ATOM | 9548 | O   | ASN A 125 | 23.455 | 36.454 | -81.115 | 1.00 | 0.00 | C | O |
| ATOM | 9549 | N   | ASN A 126 | 24.172 | 38.259 | -79.960 | 1.00 | 0.00 | C | N |
| ATOM | 9550 | CA  | ASN A 126 | 24.303 | 39.066 | -81.138 | 1.00 | 0.00 | C | C |
| ATOM | 9551 | CB  | ASN A 126 | 23.788 | 40.502 | -80.925 | 1.00 | 0.00 | C | C |
| ATOM | 9552 | CG  | ASN A 126 | 23.429 | 41.093 | -82.276 | 1.00 | 0.00 | C | C |
| ATOM | 9553 | OD1 | ASN A 126 | 23.471 | 40.407 | -83.295 | 1.00 | 0.00 | C | O |
| ATOM | 9554 | ND2 | ASN A 126 | 23.055 | 42.401 | -82.289 | 1.00 | 0.00 | C | N |
| ATOM | 9555 | C   | ASN A 126 | 25.755 | 39.141 | -81.531 | 1.00 | 0.00 | C | C |
| ATOM | 9556 | O   | ASN A 126 | 26.587 | 39.685 | -80.807 | 1.00 | 0.00 | C | O |



|      |      |     |           |        |        |         |      |      |   |   |
|------|------|-----|-----------|--------|--------|---------|------|------|---|---|
| ATOM | 9557 | N   | CYS A 127 | 26.093 | 38.535 | -82.687 | 1.00 | 0.00 | C | N |
| ATOM | 9558 | CA  | CYS A 127 | 27.412 | 38.513 | -83.260 | 1.00 | 0.00 | C | C |
| ATOM | 9559 | CB  | CYS A 127 | 27.573 | 37.449 | -84.356 | 1.00 | 0.00 | C | C |
| ATOM | 9560 | SG  | CYS A 127 | 27.570 | 35.767 | -83.677 | 1.00 | 0.00 | C | S |
| ATOM | 9561 | C   | CYS A 127 | 27.790 | 39.832 | -83.873 | 1.00 | 0.00 | C | C |
| ATOM | 9562 | O   | CYS A 127 | 28.973 | 40.151 | -83.965 | 1.00 | 0.00 | C | O |
| ATOM | 9563 | N   | GLN A 128 | 26.810 | 40.601 | -84.386 | 1.00 | 0.00 | C | N |
| ATOM | 9564 | CA  | GLN A 128 | 27.115 | 41.809 | -85.112 | 1.00 | 0.00 | C | C |
| ATOM | 9565 | CB  | GLN A 128 | 25.928 | 42.351 | -85.932 | 1.00 | 0.00 | C | C |
| ATOM | 9566 | CG  | GLN A 128 | 25.589 | 41.452 | -87.124 | 1.00 | 0.00 | C | C |
| ATOM | 9567 | CD  | GLN A 128 | 24.567 | 42.149 | -88.015 | 1.00 | 0.00 | C | C |
| ATOM | 9568 | OE1 | GLN A 128 | 23.690 | 41.506 | -88.589 | 1.00 | 0.00 | C | O |
| ATOM | 9569 | NE2 | GLN A 128 | 24.688 | 43.497 | -88.147 | 1.00 | 0.00 | C | N |
| ATOM | 9570 | C   | GLN A 128 | 27.673 | 42.923 | -84.268 | 1.00 | 0.00 | C | C |
| ATOM | 9571 | O   | GLN A 128 | 28.622 | 43.591 | -84.677 | 1.00 | 0.00 | C | O |
| ATOM | 9572 | N   | ASP A 129 | 27.140 | 43.142 | -83.054 | 1.00 | 0.00 | C | N |
| ATOM | 9573 | CA  | ASP A 129 | 27.569 | 44.256 | -82.246 | 1.00 | 0.00 | C | C |
| ATOM | 9574 | CB  | ASP A 129 | 26.831 | 44.325 | -80.897 | 1.00 | 0.00 | C | C |
| ATOM | 9575 | CG  | ASP A 129 | 25.381 | 44.700 | -81.173 | 1.00 | 0.00 | C | C |
| ATOM | 9576 | OD1 | ASP A 129 | 25.097 | 45.153 | -82.315 | 1.00 | 0.00 | C | O |
| ATOM | 9577 | OD2 | ASP A 129 | 24.540 | 44.539 | -80.249 | 1.00 | 0.00 | C | O |
| ATOM | 9578 | C   | ASP A 129 | 29.033 | 44.097 | -81.967 | 1.00 | 0.00 | C | C |
| ATOM | 9579 | O   | ASP A 129 | 29.735 | 45.060 | -81.663 | 1.00 | 0.00 | C | O |
| ATOM | 9580 | N   | LEU A 130 | 29.481 | 42.834 | -81.980 | 1.00 | 0.00 | C | N |
| ATOM | 9581 | CA  | LEU A 130 | 30.812 | 42.333 | -81.788 | 1.00 | 0.00 | C | C |
| ATOM | 9582 | CB  | LEU A 130 | 30.829 | 40.841 | -81.412 | 1.00 | 0.00 | C | C |
| ATOM | 9583 | CG  | LEU A 130 | 30.203 | 40.571 | -80.028 | 1.00 | 0.00 | C | C |
| ATOM | 9584 | CD1 | LEU A 130 | 30.227 | 39.078 | -79.671 | 1.00 | 0.00 | C | C |
| ATOM | 9585 | CD2 | LEU A 130 | 30.864 | 41.437 | -78.944 | 1.00 | 0.00 | C | C |
| ATOM | 9586 | C   | LEU A 130 | 31.693 | 42.538 | -82.981 | 1.00 | 0.00 | C | C |
| ATOM | 9587 | O   | LEU A 130 | 32.883 | 42.240 | -82.911 | 1.00 | 0.00 | C | O |
| ATOM | 9588 | N   | GLU A 131 | 31.134 | 42.929 | -84.141 | 1.00 | 0.00 | C | N |
| ATOM | 9589 | CA  | GLU A 131 | 31.920 | 43.033 | -85.342 | 1.00 | 0.00 | C | C |
| ATOM | 9590 | CB  | GLU A 131 | 31.074 | 43.508 | -86.532 | 1.00 | 0.00 | C | C |
| ATOM | 9591 | CG  | GLU A 131 | 29.959 | 42.513 | -86.876 | 1.00 | 0.00 | C | C |
| ATOM | 9592 | CD  | GLU A 131 | 29.087 | 43.120 | -87.964 | 1.00 | 0.00 | C | C |
| ATOM | 9593 | OE1 | GLU A 131 | 28.118 | 43.845 | -87.613 | 1.00 | 0.00 | C | O |
| ATOM | 9594 | OE2 | GLU A 131 | 29.380 | 42.870 | -89.163 | 1.00 | 0.00 | C | O |

|      |      |     |           |        |        |         |      |      |   |   |
|------|------|-----|-----------|--------|--------|---------|------|------|---|---|
| ATOM | 9595 | C   | GLU A 131 | 33.075 | 43.984 | -85.154 | 1.00 | 0.00 | C | C |
| ATOM | 9596 | O   | GLU A 131 | 34.196 | 43.684 | -85.561 | 1.00 | 0.00 | C | O |
| ATOM | 9597 | N   | SER A 132 | 32.846 | 45.158 | -84.536 | 1.00 | 0.00 | C | N |
| ATOM | 9598 | CA  | SER A 132 | 33.880 | 46.143 | -84.341 | 1.00 | 0.00 | C | C |
| ATOM | 9599 | CB  | SER A 132 | 33.313 | 47.548 | -84.067 | 1.00 | 0.00 | C | C |
| ATOM | 9600 | OG  | SER A 132 | 32.611 | 48.024 | -85.207 | 1.00 | 0.00 | C | O |
| ATOM | 9601 | C   | SER A 132 | 34.772 | 45.793 | -83.180 | 1.00 | 0.00 | C | C |
| ATOM | 9602 | O   | SER A 132 | 35.675 | 46.559 | -82.847 | 1.00 | 0.00 | C | O |
| ATOM | 9603 | N   | LEU A 133 | 34.523 | 44.653 | -82.505 | 1.00 | 0.00 | C | N |
| ATOM | 9604 | CA  | LEU A 133 | 35.211 | 44.333 | -81.283 | 1.00 | 0.00 | C | C |
| ATOM | 9605 | CB  | LEU A 133 | 34.601 | 43.107 | -80.570 | 1.00 | 0.00 | C | C |
| ATOM | 9606 | CG  | LEU A 133 | 35.277 | 42.763 | -79.224 | 1.00 | 0.00 | C | C |
| ATOM | 9607 | CD1 | LEU A 133 | 35.192 | 43.943 | -78.244 | 1.00 | 0.00 | C | C |
| ATOM | 9608 | CD2 | LEU A 133 | 34.704 | 41.467 | -78.615 | 1.00 | 0.00 | C | C |
| ATOM | 9609 | C   | LEU A 133 | 36.696 | 44.100 | -81.425 | 1.00 | 0.00 | C | C |
| ATOM | 9610 | O   | LEU A 133 | 37.484 | 44.758 | -80.747 | 1.00 | 0.00 | C | O |
| ATOM | 9611 | N   | LEU A 134 | 37.135 | 43.217 | -82.346 | 1.00 | 0.00 | C | N |
| ATOM | 9612 | CA  | LEU A 134 | 38.519 | 42.833 | -82.408 | 1.00 | 0.00 | C | C |
| ATOM | 9613 | CB  | LEU A 134 | 38.772 | 41.821 | -83.540 | 1.00 | 0.00 | C | C |
| ATOM | 9614 | CG  | LEU A 134 | 40.113 | 41.054 | -83.502 | 1.00 | 0.00 | C | C |
| ATOM | 9615 | CD1 | LEU A 134 | 40.316 | 40.307 | -84.823 | 1.00 | 0.00 | C | C |
| ATOM | 9616 | CD2 | LEU A 134 | 41.327 | 41.907 | -83.114 | 1.00 | 0.00 | C | C |
| ATOM | 9617 | C   | LEU A 134 | 39.357 | 44.047 | -82.692 | 1.00 | 0.00 | C | C |
| ATOM | 9618 | O   | LEU A 134 | 40.395 | 44.261 | -82.072 | 1.00 | 0.00 | C | O |
| ATOM | 9619 | N   | LEU A 135 | 38.915 | 44.904 | -83.625 | 1.00 | 0.00 | C | N |
| ATOM | 9620 | CA  | LEU A 135 | 39.713 | 46.026 | -84.014 | 1.00 | 0.00 | C | C |
| ATOM | 9621 | CB  | LEU A 135 | 39.133 | 46.800 | -85.218 | 1.00 | 0.00 | C | C |
| ATOM | 9622 | CG  | LEU A 135 | 37.697 | 47.327 | -85.046 | 1.00 | 0.00 | C | C |
| ATOM | 9623 | CD1 | LEU A 135 | 37.623 | 48.473 | -84.025 | 1.00 | 0.00 | C | C |
| ATOM | 9624 | CD2 | LEU A 135 | 37.084 | 47.701 | -86.406 | 1.00 | 0.00 | C | C |
| ATOM | 9625 | C   | LEU A 135 | 39.927 | 46.966 | -82.861 | 1.00 | 0.00 | C | C |
| ATOM | 9626 | O   | LEU A 135 | 40.976 | 47.602 | -82.783 | 1.00 | 0.00 | C | O |
| ATOM | 9627 | N   | PHE A 136 | 38.946 | 47.093 | -81.946 | 1.00 | 0.00 | C | N |
| ATOM | 9628 | CA  | PHE A 136 | 39.044 | 48.034 | -80.859 | 1.00 | 0.00 | C | C |
| ATOM | 9629 | CB  | PHE A 136 | 37.763 | 48.054 | -80.000 | 1.00 | 0.00 | C | C |
| ATOM | 9630 | CG  | PHE A 136 | 38.046 | 48.744 | -78.708 | 1.00 | 0.00 | C | C |
| ATOM | 9631 | CD1 | PHE A 136 | 38.109 | 50.115 | -78.629 | 1.00 | 0.00 | C | C |
| ATOM | 9632 | CE1 | PHE A 136 | 38.374 | 50.732 | -77.430 | 1.00 | 0.00 | C | C |

|      |      |     |     |   |     |        |        |         |      |      |   |   |
|------|------|-----|-----|---|-----|--------|--------|---------|------|------|---|---|
| ATOM | 9633 | CZ  | PHE | A | 136 | 38.582 | 49.976 | -76.301 | 1.00 | 0.00 | C | C |
| ATOM | 9634 | CD2 | PHE | A | 136 | 38.265 | 47.994 | -77.575 | 1.00 | 0.00 | C | C |
| ATOM | 9635 | CE2 | PHE | A | 136 | 38.530 | 48.604 | -76.373 | 1.00 | 0.00 | C | C |
| ATOM | 9636 | C   | PHE | A | 136 | 40.221 | 47.756 | -79.966 | 1.00 | 0.00 | C | C |
| ATOM | 9637 | O   | PHE | A | 136 | 41.063 | 48.628 | -79.755 | 1.00 | 0.00 | C | O |
| ATOM | 9638 | N   | LEU | A | 137 | 40.338 | 46.519 | -79.447 | 1.00 | 0.00 | C | N |
| ATOM | 9639 | CA  | LEU | A | 137 | 41.389 | 46.156 | -78.539 | 1.00 | 0.00 | C | C |
| ATOM | 9640 | CB  | LEU | A | 137 | 41.198 | 44.830 | -77.762 | 1.00 | 0.00 | C | C |
| ATOM | 9641 | CG  | LEU | A | 137 | 40.930 | 43.562 | -78.593 | 1.00 | 0.00 | C | C |
| ATOM | 9642 | CD1 | LEU | A | 137 | 40.792 | 42.325 | -77.685 | 1.00 | 0.00 | C | C |
| ATOM | 9643 | CD2 | LEU | A | 137 | 39.693 | 43.741 | -79.475 | 1.00 | 0.00 | C | C |
| ATOM | 9644 | C   | LEU | A | 137 | 42.699 | 46.120 | -79.251 | 1.00 | 0.00 | C | C |
| ATOM | 9645 | O   | LEU | A | 137 | 43.736 | 45.935 | -78.618 | 1.00 | 0.00 | C | O |
| ATOM | 9646 | N   | GLN | A | 138 | 42.674 | 46.104 | -80.598 | 1.00 | 0.00 | C | N |
| ATOM | 9647 | CA  | GLN | A | 138 | 43.900 | 46.177 | -81.336 | 1.00 | 0.00 | C | C |
| ATOM | 9648 | CB  | GLN | A | 138 | 43.684 | 45.951 | -82.842 | 1.00 | 0.00 | C | C |
| ATOM | 9649 | CG  | GLN | A | 138 | 43.205 | 44.537 | -83.183 | 1.00 | 0.00 | C | C |
| ATOM | 9650 | CD  | GLN | A | 138 | 43.025 | 44.438 | -84.693 | 1.00 | 0.00 | C | C |
| ATOM | 9651 | OE1 | GLN | A | 138 | 43.021 | 45.446 | -85.400 | 1.00 | 0.00 | C | O |
| ATOM | 9652 | NE2 | GLN | A | 138 | 42.863 | 43.190 | -85.206 | 1.00 | 0.00 | C | N |
| ATOM | 9653 | C   | GLN | A | 138 | 44.519 | 47.537 | -81.154 | 1.00 | 0.00 | C | C |
| ATOM | 9654 | O   | GLN | A | 138 | 45.712 | 47.643 | -80.870 | 1.00 | 0.00 | C | O |
| ATOM | 9655 | N   | LYS | A | 139 | 43.727 | 48.621 | -81.320 | 1.00 | 0.00 | C | N |
| ATOM | 9656 | CA  | LYS | A | 139 | 44.289 | 49.939 | -81.178 | 1.00 | 0.00 | C | C |
| ATOM | 9657 | CB  | LYS | A | 139 | 43.318 | 51.081 | -81.500 | 1.00 | 0.00 | C | C |
| ATOM | 9658 | CG  | LYS | A | 139 | 43.958 | 52.440 | -81.197 | 1.00 | 0.00 | C | C |
| ATOM | 9659 | CD  | LYS | A | 139 | 43.070 | 53.646 | -81.492 | 1.00 | 0.00 | C | C |
| ATOM | 9660 | CE  | LYS | A | 139 | 43.658 | 54.963 | -80.980 | 1.00 | 0.00 | C | C |
| ATOM | 9661 | NZ  | LYS | A | 139 | 42.690 | 56.061 | -81.187 | 1.00 | 0.00 | C | N |
| ATOM | 9662 | C   | LYS | A | 139 | 44.691 | 50.195 | -79.764 | 1.00 | 0.00 | C | C |
| ATOM | 9663 | O   | LYS | A | 139 | 45.846 | 50.515 | -79.481 | 1.00 | 0.00 | C | O |
| ATOM | 9664 | N   | SER | A | 140 | 43.725 | 50.039 | -78.843 | 1.00 | 0.00 | C | N |
| ATOM | 9665 | CA  | SER | A | 140 | 43.919 | 50.317 | -77.449 | 1.00 | 0.00 | C | C |
| ATOM | 9666 | CB  | SER | A | 140 | 42.602 | 50.326 | -76.654 | 1.00 | 0.00 | C | C |
| ATOM | 9667 | OG  | SER | A | 140 | 41.979 | 49.053 | -76.717 | 1.00 | 0.00 | C | O |
| ATOM | 9668 | C   | SER | A | 140 | 44.811 | 49.272 | -76.865 | 1.00 | 0.00 | C | C |
| ATOM | 9669 | O   | SER | A | 140 | 45.390 | 49.460 | -75.799 | 1.00 | 0.00 | C | O |
| ATOM | 9670 | N   | LYS | A | 141 | 44.944 | 48.133 | -77.560 | 1.00 | 0.00 | C | N |

|      |      |     |     |   |     |        |        |         |      |      |   |   |
|------|------|-----|-----|---|-----|--------|--------|---------|------|------|---|---|
| ATOM | 9671 | CA  | LYS | A | 141 | 45.754 | 47.059 | -77.069 | 1.00 | 0.00 | C | C |
| ATOM | 9672 | CB  | LYS | A | 141 | 47.220 | 47.445 | -76.796 | 1.00 | 0.00 | C | C |
| ATOM | 9673 | CG  | LYS | A | 141 | 48.057 | 47.727 | -78.046 | 1.00 | 0.00 | C | C |
| ATOM | 9674 | CD  | LYS | A | 141 | 48.146 | 46.550 | -79.013 | 1.00 | 0.00 | C | C |
| ATOM | 9675 | CE  | LYS | A | 141 | 49.248 | 46.709 | -80.062 | 1.00 | 0.00 | C | C |
| ATOM | 9676 | NZ  | LYS | A | 141 | 49.092 | 47.991 | -80.785 | 1.00 | 0.00 | C | N |
| ATOM | 9677 | C   | LYS | A | 141 | 45.184 | 46.592 | -75.769 | 1.00 | 0.00 | C | C |
| ATOM | 9678 | O   | LYS | A | 141 | 45.898 | 46.033 | -74.940 | 1.00 | 0.00 | C | O |
| ATOM | 9679 | N   | LYS | A | 142 | 43.869 | 46.800 | -75.559 | 1.00 | 0.00 | C | N |
| ATOM | 9680 | CA  | LYS | A | 142 | 43.238 | 46.333 | -74.358 | 1.00 | 0.00 | C | C |
| ATOM | 9681 | CB  | LYS | A | 142 | 41.868 | 46.975 | -74.073 | 1.00 | 0.00 | C | C |
| ATOM | 9682 | CG  | LYS | A | 142 | 41.965 | 48.391 | -73.499 | 1.00 | 0.00 | C | C |
| ATOM | 9683 | CD  | LYS | A | 142 | 40.637 | 49.150 | -73.487 | 1.00 | 0.00 | C | C |
| ATOM | 9684 | CE  | LYS | A | 142 | 40.644 | 50.376 | -72.569 | 1.00 | 0.00 | C | C |
| ATOM | 9685 | NZ  | LYS | A | 142 | 41.729 | 51.305 | -72.957 | 1.00 | 0.00 | C | N |
| ATOM | 9686 | C   | LYS | A | 142 | 43.026 | 44.863 | -74.514 | 1.00 | 0.00 | C | C |
| ATOM | 9687 | O   | LYS | A | 142 | 42.994 | 44.349 | -75.630 | 1.00 | 0.00 | C | O |
| ATOM | 9688 | N   | HSD | A | 143 | 42.898 | 44.135 | -73.385 | 1.00 | 0.00 | C | N |
| ATOM | 9689 | CA  | HSD | A | 143 | 42.710 | 42.718 | -73.490 | 1.00 | 0.00 | C | C |
| ATOM | 9690 | CB  | HSD | A | 143 | 43.745 | 41.882 | -72.714 | 1.00 | 0.00 | C | C |
| ATOM | 9691 | ND1 | HSD | A | 143 | 45.541 | 41.244 | -74.399 | 1.00 | 0.00 | C | N |
| ATOM | 9692 | CG  | HSD | A | 143 | 45.130 | 41.950 | -73.288 | 1.00 | 0.00 | C | C |
| ATOM | 9693 | CE1 | HSD | A | 143 | 46.844 | 41.557 | -74.601 | 1.00 | 0.00 | C | C |
| ATOM | 9694 | NE2 | HSD | A | 143 | 47.301 | 42.411 | -73.701 | 1.00 | 0.00 | C | N |
| ATOM | 9695 | CD2 | HSD | A | 143 | 46.218 | 42.654 | -72.874 | 1.00 | 0.00 | C | C |
| ATOM | 9696 | C   | HSD | A | 143 | 41.362 | 42.362 | -72.953 | 1.00 | 0.00 | C | C |
| ATOM | 9697 | O   | HSD | A | 143 | 40.838 | 42.991 | -72.035 | 1.00 | 0.00 | C | O |
| ATOM | 9698 | N   | LEU | A | 144 | 40.786 | 41.285 | -73.515 | 1.00 | 0.00 | C | N |
| ATOM | 9699 | CA  | LEU | A | 144 | 39.487 | 40.784 | -73.179 | 1.00 | 0.00 | C | C |
| ATOM | 9700 | CB  | LEU | A | 144 | 39.118 | 39.562 | -74.040 | 1.00 | 0.00 | C | C |
| ATOM | 9701 | CG  | LEU | A | 144 | 37.666 | 39.084 | -73.877 | 1.00 | 0.00 | C | C |
| ATOM | 9702 | CD1 | LEU | A | 144 | 36.683 | 40.174 | -74.331 | 1.00 | 0.00 | C | C |
| ATOM | 9703 | CD2 | LEU | A | 144 | 37.432 | 37.751 | -74.606 | 1.00 | 0.00 | C | C |
| ATOM | 9704 | C   | LEU | A | 144 | 39.533 | 40.365 | -71.733 | 1.00 | 0.00 | C | C |
| ATOM | 9705 | O   | LEU | A | 144 | 38.505 | 40.227 | -71.074 | 1.00 | 0.00 | C | O |
| ATOM | 9706 | N   | THR | A | 145 | 40.750 | 40.038 | -71.268 | 1.00 | 0.00 | C | N |
| ATOM | 9707 | CA  | THR | A | 145 | 41.122 | 39.605 | -69.943 | 1.00 | 0.00 | C | C |
| ATOM | 9708 | CB  | THR | A | 145 | 42.423 | 38.866 | -69.942 | 1.00 | 0.00 | C | C |

|      |      |               |        |        |         |      |      |   |   |
|------|------|---------------|--------|--------|---------|------|------|---|---|
| ATOM | 9709 | OG1 THR A 145 | 43.466 | 39.708 | -70.410 | 1.00 | 0.00 | C | O |
| ATOM | 9710 | CG2 THR A 145 | 42.281 | 37.635 | -70.852 | 1.00 | 0.00 | C | C |
| ATOM | 9711 | C THR A 145   | 41.244 | 40.717 | -68.938 | 1.00 | 0.00 | C | C |
| ATOM | 9712 | O THR A 145   | 41.248 | 40.443 | -67.740 | 1.00 | 0.00 | C | O |
| ATOM | 9713 | N ASP A 146   | 41.402 | 41.984 | -69.371 | 1.00 | 0.00 | C | N |
| ATOM | 9714 | CA ASP A 146  | 41.689 | 43.057 | -68.448 | 1.00 | 0.00 | C | C |
| ATOM | 9715 | CB ASP A 146  | 41.702 | 44.447 | -69.102 | 1.00 | 0.00 | C | C |
| ATOM | 9716 | CG ASP A 146  | 42.934 | 44.547 | -69.989 | 1.00 | 0.00 | C | C |
| ATOM | 9717 | OD1 ASP A 146 | 43.799 | 43.631 | -69.913 | 1.00 | 0.00 | C | O |
| ATOM | 9718 | OD2 ASP A 146 | 43.032 | 45.546 | -70.750 | 1.00 | 0.00 | C | O |
| ATOM | 9719 | C ASP A 146   | 40.685 | 43.094 | -67.335 | 1.00 | 0.00 | C | C |
| ATOM | 9720 | O ASP A 146   | 39.571 | 42.586 | -67.446 | 1.00 | 0.00 | C | O |
| ATOM | 9721 | N ASN A 147   | 41.089 | 43.723 | -66.213 | 1.00 | 0.00 | C | N |
| ATOM | 9722 | CA ASN A 147  | 40.309 | 43.798 | -65.006 | 1.00 | 0.00 | C | C |
| ATOM | 9723 | CB ASN A 147  | 41.007 | 44.581 | -63.880 | 1.00 | 0.00 | C | C |
| ATOM | 9724 | CG ASN A 147  | 42.224 | 43.787 | -63.423 | 1.00 | 0.00 | C | C |
| ATOM | 9725 | OD1 ASN A 147 | 43.332 | 44.319 | -63.362 | 1.00 | 0.00 | C | O |
| ATOM | 9726 | ND2 ASN A 147 | 42.020 | 42.485 | -63.090 | 1.00 | 0.00 | C | N |
| ATOM | 9727 | C ASN A 147   | 39.011 | 44.487 | -65.305 | 1.00 | 0.00 | C | C |
| ATOM | 9728 | O ASN A 147   | 37.979 | 44.161 | -64.720 | 1.00 | 0.00 | C | O |
| ATOM | 9729 | N GLU A 148   | 39.043 | 45.449 | -66.245 | 1.00 | 0.00 | C | N |
| ATOM | 9730 | CA GLU A 148  | 37.922 | 46.267 | -66.635 | 1.00 | 0.00 | C | C |
| ATOM | 9731 | CB GLU A 148  | 38.247 | 47.141 | -67.860 | 1.00 | 0.00 | C | C |
| ATOM | 9732 | CG GLU A 148  | 39.453 | 48.066 | -67.733 | 1.00 | 0.00 | C | C |
| ATOM | 9733 | CD GLU A 148  | 39.837 | 48.467 | -69.153 | 1.00 | 0.00 | C | C |
| ATOM | 9734 | OE1 GLU A 148 | 39.870 | 47.565 | -70.034 | 1.00 | 0.00 | C | O |
| ATOM | 9735 | OE2 GLU A 148 | 40.102 | 49.677 | -69.381 | 1.00 | 0.00 | C | O |
| ATOM | 9736 | C GLU A 148   | 36.824 | 45.396 | -67.168 | 1.00 | 0.00 | C | C |
| ATOM | 9737 | O GLU A 148   | 35.640 | 45.695 | -67.028 | 1.00 | 0.00 | C | O |
| ATOM | 9738 | N PHE A 149   | 37.226 | 44.330 | -67.874 | 1.00 | 0.00 | C | N |
| ATOM | 9739 | CA PHE A 149  | 36.399 | 43.388 | -68.569 | 1.00 | 0.00 | C | C |
| ATOM | 9740 | CB PHE A 149  | 37.145 | 42.632 | -69.683 | 1.00 | 0.00 | C | C |
| ATOM | 9741 | CG PHE A 149  | 37.391 | 43.641 | -70.756 | 1.00 | 0.00 | C | C |
| ATOM | 9742 | CD1 PHE A 149 | 36.367 | 44.027 | -71.592 | 1.00 | 0.00 | C | C |
| ATOM | 9743 | CE1 PHE A 149 | 36.577 | 44.956 | -72.586 | 1.00 | 0.00 | C | C |
| ATOM | 9744 | CZ PHE A 149  | 37.821 | 45.515 | -72.756 | 1.00 | 0.00 | C | C |
| ATOM | 9745 | CD2 PHE A 149 | 38.633 | 44.206 | -70.935 | 1.00 | 0.00 | C | C |
| ATOM | 9746 | CE2 PHE A 149 | 38.851 | 45.136 | -71.927 | 1.00 | 0.00 | C | C |

|      |      |     |           |        |        |         |      |      |   |   |
|------|------|-----|-----------|--------|--------|---------|------|------|---|---|
| ATOM | 9747 | C   | PHE A 149 | 35.704 | 42.414 | -67.661 | 1.00 | 0.00 | C | C |
| ATOM | 9748 | O   | PHE A 149 | 34.867 | 41.642 | -68.124 | 1.00 | 0.00 | C | O |
| ATOM | 9749 | N   | LYS A 150 | 36.115 | 42.315 | -66.384 | 1.00 | 0.00 | C | N |
| ATOM | 9750 | CA  | LYS A 150 | 35.504 | 41.350 | -65.505 | 1.00 | 0.00 | C | C |
| ATOM | 9751 | CB  | LYS A 150 | 36.536 | 40.595 | -64.658 | 1.00 | 0.00 | C | C |
| ATOM | 9752 | CG  | LYS A 150 | 37.709 | 40.006 | -65.437 | 1.00 | 0.00 | C | C |
| ATOM | 9753 | CD  | LYS A 150 | 38.870 | 39.639 | -64.507 | 1.00 | 0.00 | C | C |
| ATOM | 9754 | CE  | LYS A 150 | 40.178 | 39.304 | -65.224 | 1.00 | 0.00 | C | C |
| ATOM | 9755 | NZ  | LYS A 150 | 41.270 | 39.178 | -64.233 | 1.00 | 0.00 | C | N |
| ATOM | 9756 | C   | LYS A 150 | 34.649 | 42.051 | -64.487 | 1.00 | 0.00 | C | C |
| ATOM | 9757 | O   | LYS A 150 | 34.850 | 43.226 | -64.182 | 1.00 | 0.00 | C | O |
| ATOM | 9758 | N   | ASP A 151 | 33.643 | 41.328 | -63.939 | 1.00 | 0.00 | C | N |
| ATOM | 9759 | CA  | ASP A 151 | 32.830 | 41.847 | -62.874 | 1.00 | 0.00 | C | C |
| ATOM | 9760 | CB  | ASP A 151 | 31.623 | 40.941 | -62.556 | 1.00 | 0.00 | C | C |
| ATOM | 9761 | CG  | ASP A 151 | 30.737 | 41.571 | -61.489 | 1.00 | 0.00 | C | C |
| ATOM | 9762 | OD1 | ASP A 151 | 31.073 | 42.681 | -60.995 | 1.00 | 0.00 | C | O |
| ATOM | 9763 | OD2 | ASP A 151 | 29.701 | 40.937 | -61.152 | 1.00 | 0.00 | C | O |
| ATOM | 9764 | C   | ASP A 151 | 33.720 | 41.893 | -61.675 | 1.00 | 0.00 | C | C |
| ATOM | 9765 | O   | ASP A 151 | 34.358 | 40.904 | -61.308 | 1.00 | 0.00 | C | O |
| ATOM | 9766 | N   | PRO A 152 | 33.749 | 43.019 | -61.033 | 1.00 | 0.00 | C | N |
| ATOM | 9767 | CD  | PRO A 152 | 33.318 | 44.267 | -61.640 | 1.00 | 0.00 | C | C |
| ATOM | 9768 | CA  | PRO A 152 | 34.654 | 43.231 | -59.941 | 1.00 | 0.00 | C | C |
| ATOM | 9769 | CB  | PRO A 152 | 34.558 | 44.725 | -59.611 | 1.00 | 0.00 | C | C |
| ATOM | 9770 | CG  | PRO A 152 | 33.388 | 45.255 | -60.470 | 1.00 | 0.00 | C | C |
| ATOM | 9771 | C   | PRO A 152 | 34.491 | 42.318 | -58.761 | 1.00 | 0.00 | C | C |
| ATOM | 9772 | O   | PRO A 152 | 35.486 | 42.106 | -58.065 | 1.00 | 0.00 | C | O |
| ATOM | 9773 | N   | GLU A 153 | 33.260 | 41.874 | -58.427 | 1.00 | 0.00 | C | N |
| ATOM | 9774 | CA  | GLU A 153 | 33.102 | 40.971 | -57.315 | 1.00 | 0.00 | C | C |
| ATOM | 9775 | CB  | GLU A 153 | 31.706 | 41.045 | -56.662 | 1.00 | 0.00 | C | C |
| ATOM | 9776 | CG  | GLU A 153 | 30.534 | 40.851 | -57.626 | 1.00 | 0.00 | C | C |
| ATOM | 9777 | CD  | GLU A 153 | 29.931 | 42.222 | -57.905 | 1.00 | 0.00 | C | C |
| ATOM | 9778 | OE1 | GLU A 153 | 30.314 | 43.191 | -57.195 | 1.00 | 0.00 | C | O |
| ATOM | 9779 | OE2 | GLU A 153 | 29.076 | 42.319 | -58.825 | 1.00 | 0.00 | C | O |
| ATOM | 9780 | C   | GLU A 153 | 33.363 | 39.522 | -57.648 | 1.00 | 0.00 | C | C |
| ATOM | 9781 | O   | GLU A 153 | 34.099 | 38.837 | -56.935 | 1.00 | 0.00 | C | O |
| ATOM | 9782 | N   | THR A 154 | 32.687 | 39.020 | -58.709 | 1.00 | 0.00 | C | N |
| ATOM | 9783 | CA  | THR A 154 | 32.699 | 37.644 | -59.151 | 1.00 | 0.00 | C | C |
| ATOM | 9784 | CB  | THR A 154 | 31.486 | 37.298 | -59.963 | 1.00 | 0.00 | C | C |

|      |      |               |        |        |         |      |      |   |   |
|------|------|---------------|--------|--------|---------|------|------|---|---|
| ATOM | 9785 | OG1 THR A 154 | 31.440 | 38.088 | -61.142 | 1.00 | 0.00 | C | O |
| ATOM | 9786 | CG2 THR A 154 | 30.236 | 37.553 | -59.109 | 1.00 | 0.00 | C | C |
| ATOM | 9787 | C THR A 154   | 33.900 | 37.247 | -59.964 | 1.00 | 0.00 | C | C |
| ATOM | 9788 | O THR A 154   | 34.432 | 36.148 | -59.798 | 1.00 | 0.00 | C | O |
| ATOM | 9789 | N GLY A 155   | 34.358 | 38.121 | -60.881 | 1.00 | 0.00 | C | N |
| ATOM | 9790 | CA GLY A 155  | 35.450 | 37.764 | -61.748 | 1.00 | 0.00 | C | C |
| ATOM | 9791 | C GLY A 155   | 34.901 | 37.172 | -63.017 | 1.00 | 0.00 | C | C |
| ATOM | 9792 | O GLY A 155   | 35.633 | 36.550 | -63.787 | 1.00 | 0.00 | C | O |
| ATOM | 9793 | N LYS A 156   | 33.590 | 37.358 | -63.267 | 1.00 | 0.00 | C | N |
| ATOM | 9794 | CA LYS A 156  | 32.920 | 36.856 | -64.436 | 1.00 | 0.00 | C | C |
| ATOM | 9795 | CB LYS A 156  | 31.395 | 37.047 | -64.347 | 1.00 | 0.00 | C | C |
| ATOM | 9796 | CG LYS A 156  | 30.594 | 36.466 | -65.514 | 1.00 | 0.00 | C | C |
| ATOM | 9797 | CD LYS A 156  | 29.085 | 36.482 | -65.262 | 1.00 | 0.00 | C | C |
| ATOM | 9798 | CE LYS A 156  | 28.588 | 37.809 | -64.677 | 1.00 | 0.00 | C | C |
| ATOM | 9799 | NZ LYS A 156  | 27.126 | 37.762 | -64.456 | 1.00 | 0.00 | C | N |
| ATOM | 9800 | C LYS A 156   | 33.415 | 37.596 | -65.648 | 1.00 | 0.00 | C | C |
| ATOM | 9801 | O LYS A 156   | 33.711 | 38.791 | -65.591 | 1.00 | 0.00 | C | O |
| ATOM | 9802 | N THR A 157   | 33.515 | 36.878 | -66.787 | 1.00 | 0.00 | C | N |
| ATOM | 9803 | CA THR A 157  | 33.971 | 37.449 | -68.024 | 1.00 | 0.00 | C | C |
| ATOM | 9804 | CB THR A 157  | 35.178 | 36.758 | -68.584 | 1.00 | 0.00 | C | C |
| ATOM | 9805 | OG1 THR A 157 | 34.874 | 35.404 | -68.879 | 1.00 | 0.00 | C | O |
| ATOM | 9806 | CG2 THR A 157 | 36.306 | 36.834 | -67.540 | 1.00 | 0.00 | C | C |
| ATOM | 9807 | C THR A 157   | 32.855 | 37.295 | -69.005 | 1.00 | 0.00 | C | C |
| ATOM | 9808 | O THR A 157   | 31.841 | 36.665 | -68.709 | 1.00 | 0.00 | C | O |
| ATOM | 9809 | N CYS A 158   | 33.010 | 37.884 | -70.205 | 1.00 | 0.00 | C | N |
| ATOM | 9810 | CA CYS A 158  | 31.974 | 37.845 | -71.197 | 1.00 | 0.00 | C | C |
| ATOM | 9811 | CB CYS A 158  | 32.343 | 38.641 | -72.459 | 1.00 | 0.00 | C | C |
| ATOM | 9812 | SG CYS A 158  | 33.892 | 38.064 | -73.213 | 1.00 | 0.00 | C | S |
| ATOM | 9813 | C CYS A 158   | 31.713 | 36.423 | -71.578 | 1.00 | 0.00 | C | C |
| ATOM | 9814 | O CYS A 158   | 30.562 | 36.025 | -71.760 | 1.00 | 0.00 | C | O |
| ATOM | 9815 | N LEU A 159   | 32.770 | 35.601 | -71.694 | 1.00 | 0.00 | C | N |
| ATOM | 9816 | CA LEU A 159  | 32.556 | 34.236 | -72.075 | 1.00 | 0.00 | C | C |
| ATOM | 9817 | CB LEU A 159  | 33.844 | 33.408 | -72.180 | 1.00 | 0.00 | C | C |
| ATOM | 9818 | CG LEU A 159  | 33.553 | 31.960 | -72.612 | 1.00 | 0.00 | C | C |
| ATOM | 9819 | CD1 LEU A 159 | 33.124 | 31.896 | -74.085 | 1.00 | 0.00 | C | C |
| ATOM | 9820 | CD2 LEU A 159 | 34.710 | 31.016 | -72.285 | 1.00 | 0.00 | C | C |
| ATOM | 9821 | C LEU A 159   | 31.704 | 33.585 | -71.025 | 1.00 | 0.00 | C | C |
| ATOM | 9822 | O LEU A 159   | 30.836 | 32.773 | -71.339 | 1.00 | 0.00 | C | O |

|      |      |     |           |        |        |         |      |      |   |   |
|------|------|-----|-----------|--------|--------|---------|------|------|---|---|
| ATOM | 9823 | N   | LEU A 160 | 31.953 | 33.908 | -69.743 | 1.00 | 0.00 | C | N |
| ATOM | 9824 | CA  | LEU A 160 | 31.182 | 33.339 | -68.672 | 1.00 | 0.00 | C | C |
| ATOM | 9825 | CB  | LEU A 160 | 31.756 | 33.690 | -67.287 | 1.00 | 0.00 | C | C |
| ATOM | 9826 | CG  | LEU A 160 | 33.104 | 32.995 | -66.999 | 1.00 | 0.00 | C | C |
| ATOM | 9827 | CD1 | LEU A 160 | 33.650 | 33.361 | -65.610 | 1.00 | 0.00 | C | C |
| ATOM | 9828 | CD2 | LEU A 160 | 32.989 | 31.472 | -67.183 | 1.00 | 0.00 | C | C |
| ATOM | 9829 | C   | LEU A 160 | 29.761 | 33.817 | -68.757 | 1.00 | 0.00 | C | C |
| ATOM | 9830 | O   | LEU A 160 | 28.834 | 33.032 | -68.571 | 1.00 | 0.00 | C | O |
| ATOM | 9831 | N   | LYS A 161 | 29.536 | 35.117 | -69.052 | 1.00 | 0.00 | C | N |
| ATOM | 9832 | CA  | LYS A 161 | 28.172 | 35.572 | -69.133 | 1.00 | 0.00 | C | C |
| ATOM | 9833 | CB  | LYS A 161 | 27.970 | 37.072 | -69.407 | 1.00 | 0.00 | C | C |
| ATOM | 9834 | CG  | LYS A 161 | 26.471 | 37.395 | -69.457 | 1.00 | 0.00 | C | C |
| ATOM | 9835 | CD  | LYS A 161 | 26.096 | 38.868 | -69.309 | 1.00 | 0.00 | C | C |
| ATOM | 9836 | CE  | LYS A 161 | 24.585 | 39.111 | -69.385 | 1.00 | 0.00 | C | C |
| ATOM | 9837 | NZ  | LYS A 161 | 24.279 | 40.525 | -69.081 | 1.00 | 0.00 | C | N |
| ATOM | 9838 | C   | LYS A 161 | 27.505 | 34.825 | -70.240 | 1.00 | 0.00 | C | C |
| ATOM | 9839 | O   | LYS A 161 | 26.336 | 34.458 | -70.140 | 1.00 | 0.00 | C | O |
| ATOM | 9840 | N   | ALA A 162 | 28.253 | 34.577 | -71.325 | 1.00 | 0.00 | C | N |
| ATOM | 9841 | CA  | ALA A 162 | 27.733 | 33.868 | -72.455 | 1.00 | 0.00 | C | C |
| ATOM | 9842 | CB  | ALA A 162 | 28.782 | 33.696 | -73.572 | 1.00 | 0.00 | C | C |
| ATOM | 9843 | C   | ALA A 162 | 27.329 | 32.504 | -71.992 | 1.00 | 0.00 | C | C |
| ATOM | 9844 | O   | ALA A 162 | 26.319 | 31.959 | -72.436 | 1.00 | 0.00 | C | O |
| ATOM | 9845 | N   | MET A 163 | 28.118 | 31.913 | -71.074 | 1.00 | 0.00 | C | N |
| ATOM | 9846 | CA  | MET A 163 | 27.842 | 30.592 | -70.591 | 1.00 | 0.00 | C | C |
| ATOM | 9847 | CB  | MET A 163 | 28.949 | 30.056 | -69.666 | 1.00 | 0.00 | C | C |
| ATOM | 9848 | CG  | MET A 163 | 30.253 | 29.796 | -70.427 | 1.00 | 0.00 | C | C |
| ATOM | 9849 | SD  | MET A 163 | 30.116 | 28.485 | -71.679 | 1.00 | 0.00 | C | S |
| ATOM | 9850 | CE  | MET A 163 | 31.692 | 28.859 | -72.497 | 1.00 | 0.00 | C | C |
| ATOM | 9851 | C   | MET A 163 | 26.533 | 30.578 | -69.862 | 1.00 | 0.00 | C | C |
| ATOM | 9852 | O   | MET A 163 | 25.795 | 29.596 | -69.933 | 1.00 | 0.00 | C | O |
| ATOM | 9853 | N   | LEU A 164 | 26.236 | 31.634 | -69.082 | 1.00 | 0.00 | C | N |
| ATOM | 9854 | CA  | LEU A 164 | 24.975 | 31.712 | -68.398 | 1.00 | 0.00 | C | C |
| ATOM | 9855 | CB  | LEU A 164 | 24.940 | 32.767 | -67.282 | 1.00 | 0.00 | C | C |
| ATOM | 9856 | CG  | LEU A 164 | 25.807 | 32.388 | -66.063 | 1.00 | 0.00 | C | C |
| ATOM | 9857 | CD1 | LEU A 164 | 25.322 | 31.075 | -65.427 | 1.00 | 0.00 | C | C |
| ATOM | 9858 | CD2 | LEU A 164 | 27.302 | 32.362 | -66.400 | 1.00 | 0.00 | C | C |
| ATOM | 9859 | C   | LEU A 164 | 23.866 | 32.004 | -69.361 | 1.00 | 0.00 | C | C |
| ATOM | 9860 | O   | LEU A 164 | 22.766 | 31.465 | -69.237 | 1.00 | 0.00 | C | O |



|      |      |     |           |        |        |         |      |      |   |   |
|------|------|-----|-----------|--------|--------|---------|------|------|---|---|
| ATOM | 9861 | N   | ASN A 165 | 24.114 | 32.878 | -70.356 | 1.00 | 0.00 | C | N |
| ATOM | 9862 | CA  | ASN A 165 | 23.042 | 33.244 | -71.234 | 1.00 | 0.00 | C | C |
| ATOM | 9863 | CB  | ASN A 165 | 23.186 | 34.667 | -71.807 | 1.00 | 0.00 | C | C |
| ATOM | 9864 | CG  | ASN A 165 | 23.009 | 35.699 | -70.694 | 1.00 | 0.00 | C | C |
| ATOM | 9865 | OD1 | ASN A 165 | 22.679 | 36.851 | -70.972 | 1.00 | 0.00 | C | O |
| ATOM | 9866 | ND2 | ASN A 165 | 23.233 | 35.297 | -69.415 | 1.00 | 0.00 | C | N |
| ATOM | 9867 | C   | ASN A 165 | 23.031 | 32.310 | -72.399 | 1.00 | 0.00 | C | C |
| ATOM | 9868 | O   | ASN A 165 | 23.412 | 32.679 | -73.510 | 1.00 | 0.00 | C | O |
| ATOM | 9869 | N   | LEU A 166 | 22.550 | 31.071 | -72.187 | 1.00 | 0.00 | C | N |
| ATOM | 9870 | CA  | LEU A 166 | 22.491 | 30.151 | -73.281 | 1.00 | 0.00 | C | C |
| ATOM | 9871 | CB  | LEU A 166 | 22.938 | 28.719 | -72.937 | 1.00 | 0.00 | C | C |
| ATOM | 9872 | CG  | LEU A 166 | 24.444 | 28.587 | -72.655 | 1.00 | 0.00 | C | C |
| ATOM | 9873 | CD1 | LEU A 166 | 24.819 | 27.136 | -72.320 | 1.00 | 0.00 | C | C |
| ATOM | 9874 | CD2 | LEU A 166 | 25.279 | 29.154 | -73.816 | 1.00 | 0.00 | C | C |
| ATOM | 9875 | C   | LEU A 166 | 21.077 | 30.062 | -73.742 | 1.00 | 0.00 | C | C |
| ATOM | 9876 | O   | LEU A 166 | 20.145 | 30.228 | -72.959 | 1.00 | 0.00 | C | O |
| ATOM | 9877 | N   | HSD A 167 | 20.900 | 29.854 | -75.060 | 1.00 | 0.00 | C | N |
| ATOM | 9878 | CA  | HSD A 167 | 19.597 | 29.627 | -75.607 | 1.00 | 0.00 | C | C |
| ATOM | 9879 | CB  | HSD A 167 | 19.102 | 30.736 | -76.557 | 1.00 | 0.00 | C | C |
| ATOM | 9880 | ND1 | HSD A 167 | 21.129 | 31.312 | -77.981 | 1.00 | 0.00 | C | N |
| ATOM | 9881 | CG  | HSD A 167 | 19.847 | 30.828 | -77.856 | 1.00 | 0.00 | C | C |
| ATOM | 9882 | CE1 | HSD A 167 | 21.453 | 31.229 | -79.296 | 1.00 | 0.00 | C | C |
| ATOM | 9883 | NE2 | HSD A 167 | 20.471 | 30.725 | -80.022 | 1.00 | 0.00 | C | N |
| ATOM | 9884 | CD2 | HSD A 167 | 19.460 | 30.473 | -79.113 | 1.00 | 0.00 | C | C |
| ATOM | 9885 | C   | HSD A 167 | 19.724 | 28.347 | -76.374 | 1.00 | 0.00 | C | C |
| ATOM | 9886 | O   | HSD A 167 | 20.570 | 28.217 | -77.259 | 1.00 | 0.00 | C | O |
| ATOM | 9887 | N   | ASP A 168 | 18.896 | 27.345 | -76.026 | 1.00 | 0.00 | C | N |
| ATOM | 9888 | CA  | ASP A 168 | 18.953 | 26.072 | -76.687 | 1.00 | 0.00 | C | C |
| ATOM | 9889 | CB  | ASP A 168 | 18.492 | 26.115 | -78.157 | 1.00 | 0.00 | C | C |
| ATOM | 9890 | CG  | ASP A 168 | 16.970 | 26.058 | -78.173 | 1.00 | 0.00 | C | C |
| ATOM | 9891 | OD1 | ASP A 168 | 16.429 | 24.941 | -77.942 | 1.00 | 0.00 | C | O |
| ATOM | 9892 | OD2 | ASP A 168 | 16.326 | 27.114 | -78.399 | 1.00 | 0.00 | C | O |
| ATOM | 9893 | C   | ASP A 168 | 20.342 | 25.521 | -76.618 | 1.00 | 0.00 | C | C |
| ATOM | 9894 | O   | ASP A 168 | 20.796 | 24.855 | -77.549 | 1.00 | 0.00 | C | O |
| ATOM | 9895 | N   | GLY A 169 | 21.056 | 25.773 | -75.504 | 1.00 | 0.00 | C | N |
| ATOM | 9896 | CA  | GLY A 169 | 22.364 | 25.215 | -75.308 | 1.00 | 0.00 | C | C |
| ATOM | 9897 | C   | GLY A 169 | 23.299 | 25.744 | -76.351 | 1.00 | 0.00 | C | C |
| ATOM | 9898 | O   | GLY A 169 | 24.277 | 25.079 | -76.692 | 1.00 | 0.00 | C | O |

|      |      |     |           |        |        |         |      |      |   |   |
|------|------|-----|-----------|--------|--------|---------|------|------|---|---|
| ATOM | 9899 | N   | GLN A 170 | 23.036 | 26.958 | -76.880 | 1.00 | 0.00 | C | N |
| ATOM | 9900 | CA  | GLN A 170 | 23.876 | 27.469 | -77.932 | 1.00 | 0.00 | C | C |
| ATOM | 9901 | CB  | GLN A 170 | 23.233 | 27.358 | -79.323 | 1.00 | 0.00 | C | C |
| ATOM | 9902 | CG  | GLN A 170 | 22.997 | 25.918 | -79.776 | 1.00 | 0.00 | C | C |
| ATOM | 9903 | CD  | GLN A 170 | 22.254 | 25.959 | -81.105 | 1.00 | 0.00 | C | C |
| ATOM | 9904 | OE1 | GLN A 170 | 21.152 | 25.428 | -81.228 | 1.00 | 0.00 | C | O |
| ATOM | 9905 | NE2 | GLN A 170 | 22.868 | 26.610 | -82.126 | 1.00 | 0.00 | C | N |
| ATOM | 9906 | C   | GLN A 170 | 24.171 | 28.923 | -77.729 | 1.00 | 0.00 | C | C |
| ATOM | 9907 | O   | GLN A 170 | 23.361 | 29.677 | -77.186 | 1.00 | 0.00 | C | O |
| ATOM | 9908 | N   | ASN A 171 | 25.384 | 29.338 | -78.155 | 1.00 | 0.00 | C | N |
| ATOM | 9909 | CA  | ASN A 171 | 25.791 | 30.715 | -78.123 | 1.00 | 0.00 | C | C |
| ATOM | 9910 | CB  | ASN A 171 | 26.204 | 31.159 | -76.706 | 1.00 | 0.00 | C | C |
| ATOM | 9911 | CG  | ASN A 171 | 26.265 | 32.675 | -76.647 | 1.00 | 0.00 | C | C |
| ATOM | 9912 | OD1 | ASN A 171 | 26.388 | 33.346 | -77.670 | 1.00 | 0.00 | C | O |
| ATOM | 9913 | ND2 | ASN A 171 | 26.182 | 33.230 | -75.409 | 1.00 | 0.00 | C | N |
| ATOM | 9914 | C   | ASN A 171 | 27.000 | 30.814 | -79.013 | 1.00 | 0.00 | C | C |
| ATOM | 9915 | O   | ASN A 171 | 28.022 | 30.180 | -78.758 | 1.00 | 0.00 | C | O |
| ATOM | 9916 | N   | THR A 172 | 26.874 | 31.574 | -80.119 | 1.00 | 0.00 | C | N |
| ATOM | 9917 | CA  | THR A 172 | 27.881 | 31.849 | -81.111 | 1.00 | 0.00 | C | C |
| ATOM | 9918 | CB  | THR A 172 | 27.279 | 32.291 | -82.407 | 1.00 | 0.00 | C | C |
| ATOM | 9919 | OG1 | THR A 172 | 26.526 | 33.480 | -82.218 | 1.00 | 0.00 | C | O |
| ATOM | 9920 | CG2 | THR A 172 | 26.365 | 31.165 | -82.921 | 1.00 | 0.00 | C | C |
| ATOM | 9921 | C   | THR A 172 | 28.821 | 32.913 | -80.637 | 1.00 | 0.00 | C | C |
| ATOM | 9922 | O   | THR A 172 | 29.936 | 33.047 | -81.139 | 1.00 | 0.00 | C | O |
| ATOM | 9923 | N   | THR A 173 | 28.354 | 33.745 | -79.691 | 1.00 | 0.00 | C | N |
| ATOM | 9924 | CA  | THR A 173 | 29.141 | 34.806 | -79.149 | 1.00 | 0.00 | C | C |
| ATOM | 9925 | CB  | THR A 173 | 28.427 | 35.534 | -78.044 | 1.00 | 0.00 | C | C |
| ATOM | 9926 | OG1 | THR A 173 | 27.231 | 36.127 | -78.532 | 1.00 | 0.00 | C | O |
| ATOM | 9927 | CG2 | THR A 173 | 29.356 | 36.612 | -77.467 | 1.00 | 0.00 | C | C |
| ATOM | 9928 | C   | THR A 173 | 30.357 | 34.161 | -78.573 | 1.00 | 0.00 | C | C |
| ATOM | 9929 | O   | THR A 173 | 31.443 | 34.741 | -78.595 | 1.00 | 0.00 | C | O |
| ATOM | 9930 | N   | ILE A 174 | 30.205 | 32.942 | -78.020 | 1.00 | 0.00 | C | N |
| ATOM | 9931 | CA  | ILE A 174 | 31.333 | 32.264 | -77.455 | 1.00 | 0.00 | C | C |
| ATOM | 9932 | CB  | ILE A 174 | 30.986 | 30.959 | -76.788 | 1.00 | 0.00 | C | C |
| ATOM | 9933 | CG2 | ILE A 174 | 32.299 | 30.260 | -76.397 | 1.00 | 0.00 | C | C |
| ATOM | 9934 | CG1 | ILE A 174 | 30.036 | 31.179 | -75.599 | 1.00 | 0.00 | C | C |
| ATOM | 9935 | CD  | ILE A 174 | 29.435 | 29.882 | -75.060 | 1.00 | 0.00 | C | C |
| ATOM | 9936 | C   | ILE A 174 | 32.337 | 31.981 | -78.535 | 1.00 | 0.00 | C | C |

|      |      |     |           |        |        |         |      |      |   |   |
|------|------|-----|-----------|--------|--------|---------|------|------|---|---|
| ATOM | 9937 | O   | ILE A 174 | 33.514 | 32.292 | -78.362 | 1.00 | 0.00 | C | O |
| ATOM | 9938 | N   | PRO A 175 | 31.944 | 31.441 | -79.665 | 1.00 | 0.00 | C | N |
| ATOM | 9939 | CD  | PRO A 175 | 30.738 | 30.637 | -79.782 | 1.00 | 0.00 | C | C |
| ATOM | 9940 | CA  | PRO A 175 | 32.897 | 31.141 | -80.696 | 1.00 | 0.00 | C | C |
| ATOM | 9941 | CB  | PRO A 175 | 32.117 | 30.403 | -81.780 | 1.00 | 0.00 | C | C |
| ATOM | 9942 | CG  | PRO A 175 | 30.976 | 29.723 | -80.998 | 1.00 | 0.00 | C | C |
| ATOM | 9943 | C   | PRO A 175 | 33.601 | 32.371 | -81.166 | 1.00 | 0.00 | C | C |
| ATOM | 9944 | O   | PRO A 175 | 34.789 | 32.297 | -81.471 | 1.00 | 0.00 | C | O |
| ATOM | 9945 | N   | LEU A 176 | 32.877 | 33.498 | -81.262 | 1.00 | 0.00 | C | N |
| ATOM | 9946 | CA  | LEU A 176 | 33.470 | 34.729 | -81.689 | 1.00 | 0.00 | C | C |
| ATOM | 9947 | CB  | LEU A 176 | 32.399 | 35.786 | -82.031 | 1.00 | 0.00 | C | C |
| ATOM | 9948 | CG  | LEU A 176 | 32.913 | 37.086 | -82.691 | 1.00 | 0.00 | C | C |
| ATOM | 9949 | CD1 | LEU A 176 | 31.734 | 37.961 | -83.139 | 1.00 | 0.00 | C | C |
| ATOM | 9950 | CD2 | LEU A 176 | 33.886 | 37.873 | -81.797 | 1.00 | 0.00 | C | C |
| ATOM | 9951 | C   | LEU A 176 | 34.367 | 35.235 | -80.600 | 1.00 | 0.00 | C | C |
| ATOM | 9952 | O   | LEU A 176 | 35.457 | 35.741 | -80.864 | 1.00 | 0.00 | C | O |
| ATOM | 9953 | N   | LEU A 177 | 33.927 | 35.107 | -79.334 | 1.00 | 0.00 | C | N |
| ATOM | 9954 | CA  | LEU A 177 | 34.669 | 35.643 | -78.228 | 1.00 | 0.00 | C | C |
| ATOM | 9955 | CB  | LEU A 177 | 33.932 | 35.493 | -76.890 | 1.00 | 0.00 | C | C |
| ATOM | 9956 | CG  | LEU A 177 | 32.689 | 36.397 | -76.805 | 1.00 | 0.00 | C | C |
| ATOM | 9957 | CD1 | LEU A 177 | 31.973 | 36.238 | -75.467 | 1.00 | 0.00 | C | C |
| ATOM | 9958 | CD2 | LEU A 177 | 33.037 | 37.862 | -77.106 | 1.00 | 0.00 | C | C |
| ATOM | 9959 | C   | LEU A 177 | 35.997 | 34.967 | -78.124 | 1.00 | 0.00 | C | C |
| ATOM | 9960 | O   | LEU A 177 | 37.020 | 35.621 | -77.928 | 1.00 | 0.00 | C | O |
| ATOM | 9961 | N   | LEU A 178 | 36.014 | 33.633 | -78.266 | 1.00 | 0.00 | C | N |
| ATOM | 9962 | CA  | LEU A 178 | 37.217 | 32.857 | -78.183 | 1.00 | 0.00 | C | C |
| ATOM | 9963 | CB  | LEU A 178 | 36.899 | 31.372 | -78.379 | 1.00 | 0.00 | C | C |
| ATOM | 9964 | CG  | LEU A 178 | 35.964 | 30.818 | -77.292 | 1.00 | 0.00 | C | C |
| ATOM | 9965 | CD1 | LEU A 178 | 35.470 | 29.410 | -77.650 | 1.00 | 0.00 | C | C |
| ATOM | 9966 | CD2 | LEU A 178 | 36.632 | 30.866 | -75.907 | 1.00 | 0.00 | C | C |
| ATOM | 9967 | C   | LEU A 178 | 38.129 | 33.264 | -79.301 | 1.00 | 0.00 | C | C |
| ATOM | 9968 | O   | LEU A 178 | 39.323 | 33.491 | -79.103 | 1.00 | 0.00 | C | O |
| ATOM | 9969 | N   | GLU A 179 | 37.563 | 33.421 | -80.509 | 1.00 | 0.00 | C | N |
| ATOM | 9970 | CA  | GLU A 179 | 38.331 | 33.717 | -81.685 | 1.00 | 0.00 | C | C |
| ATOM | 9971 | CB  | GLU A 179 | 37.424 | 33.978 | -82.898 | 1.00 | 0.00 | C | C |
| ATOM | 9972 | CG  | GLU A 179 | 38.174 | 34.343 | -84.179 | 1.00 | 0.00 | C | C |
| ATOM | 9973 | CD  | GLU A 179 | 37.140 | 34.767 | -85.213 | 1.00 | 0.00 | C | C |
| ATOM | 9974 | OE1 | GLU A 179 | 36.060 | 34.118 | -85.274 | 1.00 | 0.00 | C | O |

|      |       |     |     |   |     |        |        |         |      |      |   |   |
|------|-------|-----|-----|---|-----|--------|--------|---------|------|------|---|---|
| ATOM | 9975  | OE2 | GLU | A | 179 | 37.410 | 35.752 | -85.948 | 1.00 | 0.00 | C | O |
| ATOM | 9976  | C   | GLU | A | 179 | 39.100 | 34.977 | -81.447 | 1.00 | 0.00 | C | C |
| ATOM | 9977  | O   | GLU | A | 179 | 40.278 | 35.075 | -81.788 | 1.00 | 0.00 | C | O |
| ATOM | 9978  | N   | ILE | A | 180 | 38.444 | 35.980 | -80.838 | 1.00 | 0.00 | C | N |
| ATOM | 9979  | CA  | ILE | A | 180 | 39.074 | 37.242 | -80.599 | 1.00 | 0.00 | C | C |
| ATOM | 9980  | CB  | ILE | A | 180 | 38.156 | 38.268 | -80.003 | 1.00 | 0.00 | C | C |
| ATOM | 9981  | CG2 | ILE | A | 180 | 39.002 | 39.489 | -79.608 | 1.00 | 0.00 | C | C |
| ATOM | 9982  | CG1 | ILE | A | 180 | 37.032 | 38.601 | -80.997 | 1.00 | 0.00 | C | C |
| ATOM | 9983  | CD  | ILE | A | 180 | 35.933 | 39.477 | -80.406 | 1.00 | 0.00 | C | C |
| ATOM | 9984  | C   | ILE | A | 180 | 40.213 | 37.056 | -79.649 | 1.00 | 0.00 | C | C |
| ATOM | 9985  | O   | ILE | A | 180 | 41.250 | 37.702 | -79.784 | 1.00 | 0.00 | C | O |
| ATOM | 9986  | N   | ALA | A | 181 | 40.026 | 36.177 | -78.650 | 1.00 | 0.00 | C | N |
| ATOM | 9987  | CA  | ALA | A | 181 | 40.991 | 35.958 | -77.617 | 1.00 | 0.00 | C | C |
| ATOM | 9988  | CB  | ALA | A | 181 | 40.518 | 34.948 | -76.556 | 1.00 | 0.00 | C | C |
| ATOM | 9989  | C   | ALA | A | 181 | 42.266 | 35.432 | -78.178 | 1.00 | 0.00 | C | C |
| ATOM | 9990  | O   | ALA | A | 181 | 43.319 | 35.789 | -77.669 | 1.00 | 0.00 | C | O |
| ATOM | 9991  | N   | ARG | A | 182 | 42.227 | 34.529 | -79.175 | 1.00 | 0.00 | C | N |
| ATOM | 9992  | CA  | ARG | A | 182 | 43.433 | 33.971 | -79.736 | 1.00 | 0.00 | C | C |
| ATOM | 9993  | CB  | ARG | A | 182 | 43.196 | 32.701 | -80.580 | 1.00 | 0.00 | C | C |
| ATOM | 9994  | CG  | ARG | A | 182 | 42.234 | 32.885 | -81.753 | 1.00 | 0.00 | C | C |
| ATOM | 9995  | CD  | ARG | A | 182 | 42.016 | 31.617 | -82.586 | 1.00 | 0.00 | C | C |
| ATOM | 9996  | NE  | ARG | A | 182 | 41.300 | 30.610 | -81.748 | 1.00 | 0.00 | C | N |
| ATOM | 9997  | CZ  | ARG | A | 182 | 41.977 | 29.534 | -81.251 | 1.00 | 0.00 | C | C |
| ATOM | 9998  | NH1 | ARG | A | 182 | 43.300 | 29.369 | -81.540 | 1.00 | 0.00 | C | N |
| ATOM | 9999  | NH2 | ARG | A | 182 | 41.332 | 28.616 | -80.475 | 1.00 | 0.00 | C | N |
| ATOM | 10000 | C   | ARG | A | 182 | 44.184 | 34.979 | -80.555 | 1.00 | 0.00 | C | C |
| ATOM | 10001 | O   | ARG | A | 182 | 45.414 | 34.998 | -80.553 | 1.00 | 0.00 | C | O |
| ATOM | 10002 | N   | GLN | A | 183 | 43.465 | 35.853 | -81.284 | 1.00 | 0.00 | C | N |
| ATOM | 10003 | CA  | GLN | A | 183 | 44.131 | 36.806 | -82.121 | 1.00 | 0.00 | C | C |
| ATOM | 10004 | CB  | GLN | A | 183 | 43.159 | 37.638 | -82.978 | 1.00 | 0.00 | C | C |
| ATOM | 10005 | CG  | GLN | A | 183 | 42.399 | 36.745 | -83.968 | 1.00 | 0.00 | C | C |
| ATOM | 10006 | CD  | GLN | A | 183 | 41.630 | 37.603 | -84.958 | 1.00 | 0.00 | C | C |
| ATOM | 10007 | OE1 | GLN | A | 183 | 40.416 | 37.462 | -85.108 | 1.00 | 0.00 | C | O |
| ATOM | 10008 | NE2 | GLN | A | 183 | 42.361 | 38.495 | -85.678 | 1.00 | 0.00 | C | N |
| ATOM | 10009 | C   | GLN | A | 183 | 44.955 | 37.679 | -81.226 | 1.00 | 0.00 | C | C |
| ATOM | 10010 | O   | GLN | A | 183 | 46.010 | 38.179 | -81.618 | 1.00 | 0.00 | C | O |
| ATOM | 10011 | N   | THR | A | 184 | 44.435 | 37.954 | -80.019 | 1.00 | 0.00 | C | N |
| ATOM | 10012 | CA  | THR | A | 184 | 45.130 | 38.645 | -78.973 | 1.00 | 0.00 | C | C |

|      |       |     |     |   |     |        |        |         |      |      |   |   |
|------|-------|-----|-----|---|-----|--------|--------|---------|------|------|---|---|
| ATOM | 10013 | CB  | THR | A | 184 | 44.196 | 39.270 | -77.986 | 1.00 | 0.00 | C | C |
| ATOM | 10014 | OG1 | THR | A | 184 | 43.298 | 40.139 | -78.661 | 1.00 | 0.00 | C | O |
| ATOM | 10015 | CG2 | THR | A | 184 | 45.030 | 40.072 | -76.972 | 1.00 | 0.00 | C | C |
| ATOM | 10016 | C   | THR | A | 184 | 46.032 | 37.683 | -78.246 | 1.00 | 0.00 | C | C |
| ATOM | 10017 | O   | THR | A | 184 | 46.964 | 38.084 | -77.554 | 1.00 | 0.00 | C | O |
| ATOM | 10018 | N   | ASP | A | 185 | 45.745 | 36.373 | -78.347 | 1.00 | 0.00 | C | N |
| ATOM | 10019 | CA  | ASP | A | 185 | 46.469 | 35.344 | -77.651 | 1.00 | 0.00 | C | C |
| ATOM | 10020 | CB  | ASP | A | 185 | 47.991 | 35.442 | -77.859 | 1.00 | 0.00 | C | C |
| ATOM | 10021 | CG  | ASP | A | 185 | 48.303 | 35.053 | -79.298 | 1.00 | 0.00 | C | C |
| ATOM | 10022 | OD1 | ASP | A | 185 | 47.672 | 34.084 | -79.801 | 1.00 | 0.00 | C | O |
| ATOM | 10023 | OD2 | ASP | A | 185 | 49.171 | 35.724 | -79.916 | 1.00 | 0.00 | C | O |
| ATOM | 10024 | C   | ASP | A | 185 | 46.200 | 35.428 | -76.179 | 1.00 | 0.00 | C | C |
| ATOM | 10025 | O   | ASP | A | 185 | 46.946 | 34.881 | -75.370 | 1.00 | 0.00 | C | O |
| ATOM | 10026 | N   | SER | A | 186 | 45.096 | 36.096 | -75.795 | 1.00 | 0.00 | C | N |
| ATOM | 10027 | CA  | SER | A | 186 | 44.619 | 36.114 | -74.441 | 1.00 | 0.00 | C | C |
| ATOM | 10028 | CB  | SER | A | 186 | 43.531 | 37.175 | -74.207 | 1.00 | 0.00 | C | C |
| ATOM | 10029 | OG  | SER | A | 186 | 44.066 | 38.473 | -74.428 | 1.00 | 0.00 | C | O |
| ATOM | 10030 | C   | SER | A | 186 | 43.965 | 34.783 | -74.224 | 1.00 | 0.00 | C | C |
| ATOM | 10031 | O   | SER | A | 186 | 43.459 | 34.486 | -73.142 | 1.00 | 0.00 | C | O |
| ATOM | 10032 | N   | LEU | A | 187 | 44.021 | 33.922 | -75.253 | 1.00 | 0.00 | C | N |
| ATOM | 10033 | CA  | LEU | A | 187 | 43.194 | 32.758 | -75.312 | 1.00 | 0.00 | C | C |
| ATOM | 10034 | CB  | LEU | A | 187 | 43.417 | 31.903 | -76.569 | 1.00 | 0.00 | C | C |
| ATOM | 10035 | CG  | LEU | A | 187 | 42.402 | 30.747 | -76.656 | 1.00 | 0.00 | C | C |
| ATOM | 10036 | CD1 | LEU | A | 187 | 40.968 | 31.287 | -76.757 | 1.00 | 0.00 | C | C |
| ATOM | 10037 | CD2 | LEU | A | 187 | 42.740 | 29.768 | -77.785 | 1.00 | 0.00 | C | C |
| ATOM | 10038 | C   | LEU | A | 187 | 43.301 | 31.856 | -74.115 | 1.00 | 0.00 | C | C |
| ATOM | 10039 | O   | LEU | A | 187 | 42.268 | 31.477 | -73.570 | 1.00 | 0.00 | C | O |
| ATOM | 10040 | N   | LYS | A | 188 | 44.506 | 31.488 | -73.648 | 1.00 | 0.00 | C | N |
| ATOM | 10041 | CA  | LYS | A | 188 | 44.555 | 30.527 | -72.570 | 1.00 | 0.00 | C | C |
| ATOM | 10042 | CB  | LYS | A | 188 | 45.985 | 30.123 | -72.182 | 1.00 | 0.00 | C | C |
| ATOM | 10043 | CG  | LYS | A | 188 | 46.012 | 29.146 | -71.007 | 1.00 | 0.00 | C | C |
| ATOM | 10044 | CD  | LYS | A | 188 | 47.373 | 28.506 | -70.743 | 1.00 | 0.00 | C | C |
| ATOM | 10045 | CE  | LYS | A | 188 | 47.536 | 27.128 | -71.381 | 1.00 | 0.00 | C | C |
| ATOM | 10046 | NZ  | LYS | A | 188 | 48.717 | 26.452 | -70.804 | 1.00 | 0.00 | C | N |
| ATOM | 10047 | C   | LYS | A | 188 | 43.915 | 31.050 | -71.316 | 1.00 | 0.00 | C | C |
| ATOM | 10048 | O   | LYS | A | 188 | 43.048 | 30.391 | -70.737 | 1.00 | 0.00 | C | O |
| ATOM | 10049 | N   | GLU | A | 189 | 44.315 | 32.258 | -70.875 | 1.00 | 0.00 | C | N |
| ATOM | 10050 | CA  | GLU | A | 189 | 43.845 | 32.809 | -69.632 | 1.00 | 0.00 | C | C |

|      |       |     |           |        |        |         |      |      |   |   |
|------|-------|-----|-----------|--------|--------|---------|------|------|---|---|
| ATOM | 10051 | CB  | GLU A 189 | 44.596 | 34.083 | -69.180 | 1.00 | 0.00 | C | C |
| ATOM | 10052 | CG  | GLU A 189 | 44.537 | 35.263 | -70.153 | 1.00 | 0.00 | C | C |
| ATOM | 10053 | CD  | GLU A 189 | 45.828 | 35.276 | -70.961 | 1.00 | 0.00 | C | C |
| ATOM | 10054 | OE1 | GLU A 189 | 46.091 | 34.274 | -71.678 | 1.00 | 0.00 | C | O |
| ATOM | 10055 | OE2 | GLU A 189 | 46.571 | 36.287 | -70.869 | 1.00 | 0.00 | C | O |
| ATOM | 10056 | C   | GLU A 189 | 42.392 | 33.139 | -69.733 | 1.00 | 0.00 | C | C |
| ATOM | 10057 | O   | GLU A 189 | 41.684 | 33.147 | -68.727 | 1.00 | 0.00 | C | O |
| ATOM | 10058 | N   | LEU A 190 | 41.918 | 33.494 | -70.944 | 1.00 | 0.00 | C | N |
| ATOM | 10059 | CA  | LEU A 190 | 40.539 | 33.851 | -71.111 | 1.00 | 0.00 | C | C |
| ATOM | 10060 | CB  | LEU A 190 | 40.228 | 34.333 | -72.537 | 1.00 | 0.00 | C | C |
| ATOM | 10061 | CG  | LEU A 190 | 38.747 | 34.704 | -72.739 | 1.00 | 0.00 | C | C |
| ATOM | 10062 | CD1 | LEU A 190 | 38.339 | 35.899 | -71.867 | 1.00 | 0.00 | C | C |
| ATOM | 10063 | CD2 | LEU A 190 | 38.426 | 34.912 | -74.227 | 1.00 | 0.00 | C | C |
| ATOM | 10064 | C   | LEU A 190 | 39.647 | 32.677 | -70.844 | 1.00 | 0.00 | C | C |
| ATOM | 10065 | O   | LEU A 190 | 38.706 | 32.757 | -70.054 | 1.00 | 0.00 | C | O |
| ATOM | 10066 | N   | VAL A 191 | 39.950 | 31.538 | -71.487 | 1.00 | 0.00 | C | N |
| ATOM | 10067 | CA  | VAL A 191 | 39.180 | 30.335 | -71.367 | 1.00 | 0.00 | C | C |
| ATOM | 10068 | CB  | VAL A 191 | 39.618 | 29.269 | -72.334 | 1.00 | 0.00 | C | C |
| ATOM | 10069 | CG1 | VAL A 191 | 38.975 | 27.933 | -71.939 | 1.00 | 0.00 | C | C |
| ATOM | 10070 | CG2 | VAL A 191 | 39.197 | 29.708 | -73.747 | 1.00 | 0.00 | C | C |
| ATOM | 10071 | C   | VAL A 191 | 39.279 | 29.809 | -69.965 | 1.00 | 0.00 | C | C |
| ATOM | 10072 | O   | VAL A 191 | 38.396 | 29.076 | -69.520 | 1.00 | 0.00 | C | O |
| ATOM | 10073 | N   | ASN A 192 | 40.372 | 30.116 | -69.238 | 1.00 | 0.00 | C | N |
| ATOM | 10074 | CA  | ASN A 192 | 40.478 | 29.534 | -67.926 | 1.00 | 0.00 | C | C |
| ATOM | 10075 | CB  | ASN A 192 | 41.850 | 28.890 | -67.672 | 1.00 | 0.00 | C | C |
| ATOM | 10076 | CG  | ASN A 192 | 41.993 | 27.675 | -68.575 | 1.00 | 0.00 | C | C |
| ATOM | 10077 | OD1 | ASN A 192 | 41.029 | 26.963 | -68.852 | 1.00 | 0.00 | C | O |
| ATOM | 10078 | ND2 | ASN A 192 | 43.243 | 27.430 | -69.052 | 1.00 | 0.00 | C | N |
| ATOM | 10079 | C   | ASN A 192 | 40.282 | 30.528 | -66.810 | 1.00 | 0.00 | C | C |
| ATOM | 10080 | O   | ASN A 192 | 40.784 | 30.299 | -65.709 | 1.00 | 0.00 | C | O |
| ATOM | 10081 | N   | ALA A 193 | 39.522 | 31.623 | -67.011 | 1.00 | 0.00 | C | N |
| ATOM | 10082 | CA  | ALA A 193 | 39.329 | 32.542 | -65.914 | 1.00 | 0.00 | C | C |
| ATOM | 10083 | CB  | ALA A 193 | 38.780 | 33.912 | -66.348 | 1.00 | 0.00 | C | C |
| ATOM | 10084 | C   | ALA A 193 | 38.332 | 31.932 | -64.971 | 1.00 | 0.00 | C | C |
| ATOM | 10085 | O   | ALA A 193 | 37.413 | 31.242 | -65.404 | 1.00 | 0.00 | C | O |
| ATOM | 10086 | N   | SER A 194 | 38.470 | 32.199 | -63.652 | 1.00 | 0.00 | C | N |
| ATOM | 10087 | CA  | SER A 194 | 37.593 | 31.569 | -62.699 | 1.00 | 0.00 | C | C |
| ATOM | 10088 | CB  | SER A 194 | 38.314 | 30.539 | -61.812 | 1.00 | 0.00 | C | C |

|      |       |     |           |        |        |         |      |      |   |   |
|------|-------|-----|-----------|--------|--------|---------|------|------|---|---|
| ATOM | 10089 | OG  | SER A 194 | 39.358 | 31.162 | -61.078 | 1.00 | 0.00 | C | O |
| ATOM | 10090 | C   | SER A 194 | 36.947 | 32.585 | -61.798 | 1.00 | 0.00 | C | C |
| ATOM | 10091 | O   | SER A 194 | 37.391 | 33.727 | -61.690 | 1.00 | 0.00 | C | O |
| ATOM | 10092 | N   | TYR A 195 | 35.841 | 32.168 | -61.136 | 1.00 | 0.00 | C | N |
| ATOM | 10093 | CA  | TYR A 195 | 35.092 | 32.996 | -60.222 | 1.00 | 0.00 | C | C |
| ATOM | 10094 | CB  | TYR A 195 | 33.731 | 32.401 | -59.803 | 1.00 | 0.00 | C | C |
| ATOM | 10095 | CG  | TYR A 195 | 32.740 | 32.534 | -60.908 | 1.00 | 0.00 | C | C |
| ATOM | 10096 | CD1 | TYR A 195 | 32.716 | 31.661 | -61.970 | 1.00 | 0.00 | C | C |
| ATOM | 10097 | CE1 | TYR A 195 | 31.784 | 31.808 | -62.972 | 1.00 | 0.00 | C | C |
| ATOM | 10098 | CZ  | TYR A 195 | 30.861 | 32.825 | -62.915 | 1.00 | 0.00 | C | C |
| ATOM | 10099 | OH  | TYR A 195 | 29.903 | 32.979 | -63.941 | 1.00 | 0.00 | C | O |
| ATOM | 10100 | CD2 | TYR A 195 | 31.806 | 33.545 | -60.858 | 1.00 | 0.00 | C | C |
| ATOM | 10101 | CE2 | TYR A 195 | 30.873 | 33.695 | -61.854 | 1.00 | 0.00 | C | C |
| ATOM | 10102 | C   | TYR A 195 | 35.877 | 33.169 | -58.951 | 1.00 | 0.00 | C | C |
| ATOM | 10103 | O   | TYR A 195 | 36.494 | 32.232 | -58.455 | 1.00 | 0.00 | C | O |
| ATOM | 10104 | N   | THR A 196 | 35.970 | 34.426 | -58.480 | 1.00 | 0.00 | C | N |
| ATOM | 10105 | CA  | THR A 196 | 36.619 | 34.859 | -57.266 | 1.00 | 0.00 | C | C |
| ATOM | 10106 | CB  | THR A 196 | 37.161 | 36.249 | -57.401 | 1.00 | 0.00 | C | C |
| ATOM | 10107 | OG1 | THR A 196 | 36.103 | 37.174 | -57.603 | 1.00 | 0.00 | C | O |
| ATOM | 10108 | CG2 | THR A 196 | 38.113 | 36.275 | -58.608 | 1.00 | 0.00 | C | C |
| ATOM | 10109 | C   | THR A 196 | 35.765 | 34.819 | -56.022 | 1.00 | 0.00 | C | C |
| ATOM | 10110 | O   | THR A 196 | 36.295 | 34.679 | -54.921 | 1.00 | 0.00 | C | O |
| ATOM | 10111 | N   | ASP A 197 | 34.431 | 34.997 | -56.143 | 1.00 | 0.00 | C | N |
| ATOM | 10112 | CA  | ASP A 197 | 33.594 | 35.123 | -54.978 | 1.00 | 0.00 | C | C |
| ATOM | 10113 | CB  | ASP A 197 | 32.141 | 35.522 | -55.294 | 1.00 | 0.00 | C | C |
| ATOM | 10114 | CG  | ASP A 197 | 31.510 | 34.425 | -56.139 | 1.00 | 0.00 | C | C |
| ATOM | 10115 | OD1 | ASP A 197 | 32.238 | 33.815 | -56.966 | 1.00 | 0.00 | C | O |
| ATOM | 10116 | OD2 | ASP A 197 | 30.286 | 34.182 | -55.964 | 1.00 | 0.00 | C | O |
| ATOM | 10117 | C   | ASP A 197 | 33.577 | 33.823 | -54.239 | 1.00 | 0.00 | C | C |
| ATOM | 10118 | O   | ASP A 197 | 33.873 | 32.769 | -54.793 | 1.00 | 0.00 | C | O |
| ATOM | 10119 | N   | SER A 198 | 33.226 | 33.872 | -52.940 | 1.00 | 0.00 | C | N |
| ATOM | 10120 | CA  | SER A 198 | 33.275 | 32.694 | -52.124 | 1.00 | 0.00 | C | C |
| ATOM | 10121 | CB  | SER A 198 | 32.931 | 32.967 | -50.650 | 1.00 | 0.00 | C | C |
| ATOM | 10122 | OG  | SER A 198 | 31.583 | 33.389 | -50.527 | 1.00 | 0.00 | C | O |
| ATOM | 10123 | C   | SER A 198 | 32.304 | 31.671 | -52.626 | 1.00 | 0.00 | C | C |
| ATOM | 10124 | O   | SER A 198 | 32.522 | 30.471 | -52.459 | 1.00 | 0.00 | C | O |
| ATOM | 10125 | N   | TYR A 199 | 31.181 | 32.106 | -53.221 | 1.00 | 0.00 | C | N |
| ATOM | 10126 | CA  | TYR A 199 | 30.196 | 31.130 | -53.599 | 1.00 | 0.00 | C | C |

|      |       |     |     |   |     |        |        |         |      |      |   |   |
|------|-------|-----|-----|---|-----|--------|--------|---------|------|------|---|---|
| ATOM | 10127 | CB  | TYR | A | 199 | 28.895 | 31.837 | -54.028 | 1.00 | 0.00 | C | C |
| ATOM | 10128 | CG  | TYR | A | 199 | 27.768 | 30.868 | -54.142 | 1.00 | 0.00 | C | C |
| ATOM | 10129 | CD1 | TYR | A | 199 | 27.252 | 30.284 | -53.010 | 1.00 | 0.00 | C | C |
| ATOM | 10130 | CE1 | TYR | A | 199 | 26.204 | 29.399 | -53.092 | 1.00 | 0.00 | C | C |
| ATOM | 10131 | CZ  | TYR | A | 199 | 25.651 | 29.097 | -54.310 | 1.00 | 0.00 | C | C |
| ATOM | 10132 | OH  | TYR | A | 199 | 24.575 | 28.190 | -54.382 | 1.00 | 0.00 | C | O |
| ATOM | 10133 | CD2 | TYR | A | 199 | 27.197 | 30.576 | -55.360 | 1.00 | 0.00 | C | C |
| ATOM | 10134 | CE2 | TYR | A | 199 | 26.146 | 29.691 | -55.449 | 1.00 | 0.00 | C | C |
| ATOM | 10135 | C   | TYR | A | 199 | 30.655 | 30.232 | -54.731 | 1.00 | 0.00 | C | C |
| ATOM | 10136 | O   | TYR | A | 199 | 30.798 | 29.021 | -54.562 | 1.00 | 0.00 | C | O |
| ATOM | 10137 | N   | TYR | A | 200 | 30.920 | 30.829 | -55.910 | 1.00 | 0.00 | C | N |
| ATOM | 10138 | CA  | TYR | A | 200 | 31.287 | 30.193 | -57.156 | 1.00 | 0.00 | C | C |
| ATOM | 10139 | CB  | TYR | A | 200 | 30.811 | 30.941 | -58.413 | 1.00 | 0.00 | C | C |
| ATOM | 10140 | CG  | TYR | A | 200 | 29.573 | 31.656 | -57.992 | 1.00 | 0.00 | C | C |
| ATOM | 10141 | CD1 | TYR | A | 200 | 28.430 | 30.941 | -57.715 | 1.00 | 0.00 | C | C |
| ATOM | 10142 | CE1 | TYR | A | 200 | 27.278 | 31.580 | -57.322 | 1.00 | 0.00 | C | C |
| ATOM | 10143 | CZ  | TYR | A | 200 | 27.260 | 32.948 | -57.210 | 1.00 | 0.00 | C | C |
| ATOM | 10144 | OH  | TYR | A | 200 | 26.082 | 33.610 | -56.807 | 1.00 | 0.00 | C | O |
| ATOM | 10145 | CD2 | TYR | A | 200 | 29.545 | 33.027 | -57.887 | 1.00 | 0.00 | C | C |
| ATOM | 10146 | CE2 | TYR | A | 200 | 28.395 | 33.672 | -57.495 | 1.00 | 0.00 | C | C |
| ATOM | 10147 | C   | TYR | A | 200 | 32.733 | 29.850 | -57.306 | 1.00 | 0.00 | C | C |
| ATOM | 10148 | O   | TYR | A | 200 | 33.095 | 29.171 | -58.269 | 1.00 | 0.00 | C | O |
| ATOM | 10149 | N   | LYS | A | 201 | 33.594 | 30.417 | -56.437 | 1.00 | 0.00 | C | N |
| ATOM | 10150 | CA  | LYS | A | 201 | 35.028 | 30.432 | -56.576 | 1.00 | 0.00 | C | C |
| ATOM | 10151 | CB  | LYS | A | 201 | 35.797 | 30.710 | -55.269 | 1.00 | 0.00 | C | C |
| ATOM | 10152 | CG  | LYS | A | 201 | 35.597 | 29.667 | -54.173 | 1.00 | 0.00 | C | C |
| ATOM | 10153 | CD  | LYS | A | 201 | 36.630 | 29.766 | -53.049 | 1.00 | 0.00 | C | C |
| ATOM | 10154 | CE  | LYS | A | 201 | 37.178 | 31.178 | -52.844 | 1.00 | 0.00 | C | C |
| ATOM | 10155 | NZ  | LYS | A | 201 | 36.119 | 32.065 | -52.312 | 1.00 | 0.00 | C | N |
| ATOM | 10156 | C   | LYS | A | 201 | 35.611 | 29.225 | -57.248 | 1.00 | 0.00 | C | C |
| ATOM | 10157 | O   | LYS | A | 201 | 35.313 | 28.076 | -56.930 | 1.00 | 0.00 | C | O |
| ATOM | 10158 | N   | GLY | A | 202 | 36.442 | 29.513 | -58.270 | 1.00 | 0.00 | C | N |
| ATOM | 10159 | CA  | GLY | A | 202 | 37.186 | 28.527 | -58.992 | 1.00 | 0.00 | C | C |
| ATOM | 10160 | C   | GLY | A | 202 | 36.388 | 27.967 | -60.133 | 1.00 | 0.00 | C | C |
| ATOM | 10161 | O   | GLY | A | 202 | 36.889 | 27.112 | -60.864 | 1.00 | 0.00 | C | O |
| ATOM | 10162 | N   | GLN | A | 203 | 35.134 | 28.418 | -60.329 | 1.00 | 0.00 | C | N |
| ATOM | 10163 | CA  | GLN | A | 203 | 34.371 | 27.890 | -61.427 | 1.00 | 0.00 | C | C |
| ATOM | 10164 | CB  | GLN | A | 203 | 32.850 | 28.110 | -61.304 | 1.00 | 0.00 | C | C |



|      |       |     |     |   |     |        |        |         |      |      |   |   |
|------|-------|-----|-----|---|-----|--------|--------|---------|------|------|---|---|
| ATOM | 10165 | CG  | GLN | A | 203 | 32.053 | 27.527 | -62.477 | 1.00 | 0.00 | C | C |
| ATOM | 10166 | CD  | GLN | A | 203 | 30.570 | 27.728 | -62.197 | 1.00 | 0.00 | C | C |
| ATOM | 10167 | OE1 | GLN | A | 203 | 30.112 | 28.842 | -61.942 | 1.00 | 0.00 | C | O |
| ATOM | 10168 | NE2 | GLN | A | 203 | 29.791 | 26.615 | -62.241 | 1.00 | 0.00 | C | N |
| ATOM | 10169 | C   | GLN | A | 203 | 34.839 | 28.527 | -62.698 | 1.00 | 0.00 | C | C |
| ATOM | 10170 | O   | GLN | A | 203 | 35.069 | 29.735 | -62.766 | 1.00 | 0.00 | C | O |
| ATOM | 10171 | N   | THR | A | 204 | 34.976 | 27.693 | -63.750 | 1.00 | 0.00 | C | N |
| ATOM | 10172 | CA  | THR | A | 204 | 35.428 | 28.097 | -65.051 | 1.00 | 0.00 | C | C |
| ATOM | 10173 | CB  | THR | A | 204 | 36.629 | 27.333 | -65.524 | 1.00 | 0.00 | C | C |
| ATOM | 10174 | OG1 | THR | A | 204 | 36.314 | 25.952 | -65.623 | 1.00 | 0.00 | C | O |
| ATOM | 10175 | CG2 | THR | A | 204 | 37.783 | 27.541 | -64.529 | 1.00 | 0.00 | C | C |
| ATOM | 10176 | C   | THR | A | 204 | 34.328 | 27.779 | -66.012 | 1.00 | 0.00 | C | C |
| ATOM | 10177 | O   | THR | A | 204 | 33.337 | 27.148 | -65.653 | 1.00 | 0.00 | C | O |
| ATOM | 10178 | N   | ALA | A | 205 | 34.482 | 28.218 | -67.277 | 1.00 | 0.00 | C | N |
| ATOM | 10179 | CA  | ALA | A | 205 | 33.485 | 27.995 | -68.284 | 1.00 | 0.00 | C | C |
| ATOM | 10180 | CB  | ALA | A | 205 | 33.876 | 28.585 | -69.648 | 1.00 | 0.00 | C | C |
| ATOM | 10181 | C   | ALA | A | 205 | 33.289 | 26.518 | -68.470 | 1.00 | 0.00 | C | C |
| ATOM | 10182 | O   | ALA | A | 205 | 32.163 | 26.054 | -68.639 | 1.00 | 0.00 | C | O |
| ATOM | 10183 | N   | LEU | A | 206 | 34.375 | 25.725 | -68.424 | 1.00 | 0.00 | C | N |
| ATOM | 10184 | CA  | LEU | A | 206 | 34.260 | 24.310 | -68.649 | 1.00 | 0.00 | C | C |
| ATOM | 10185 | CB  | LEU | A | 206 | 35.616 | 23.579 | -68.611 | 1.00 | 0.00 | C | C |
| ATOM | 10186 | CG  | LEU | A | 206 | 35.506 | 22.073 | -68.916 | 1.00 | 0.00 | C | C |
| ATOM | 10187 | CD1 | LEU | A | 206 | 34.890 | 21.843 | -70.304 | 1.00 | 0.00 | C | C |
| ATOM | 10188 | CD2 | LEU | A | 206 | 36.863 | 21.366 | -68.764 | 1.00 | 0.00 | C | C |
| ATOM | 10189 | C   | LEU | A | 206 | 33.359 | 23.704 | -67.613 | 1.00 | 0.00 | C | C |
| ATOM | 10190 | O   | LEU | A | 206 | 32.612 | 22.771 | -67.906 | 1.00 | 0.00 | C | O |
| ATOM | 10191 | N   | HSD | A | 207 | 33.399 | 24.209 | -66.367 | 1.00 | 0.00 | C | N |
| ATOM | 10192 | CA  | HSD | A | 207 | 32.552 | 23.633 | -65.358 | 1.00 | 0.00 | C | C |
| ATOM | 10193 | CB  | HSD | A | 207 | 32.666 | 24.324 | -63.986 | 1.00 | 0.00 | C | C |
| ATOM | 10194 | ND1 | HSD | A | 207 | 35.069 | 24.915 | -63.400 | 1.00 | 0.00 | C | N |
| ATOM | 10195 | CG  | HSD | A | 207 | 33.969 | 24.094 | -63.286 | 1.00 | 0.00 | C | C |
| ATOM | 10196 | CE1 | HSD | A | 207 | 36.039 | 24.386 | -62.612 | 1.00 | 0.00 | C | C |
| ATOM | 10197 | NE2 | HSD | A | 207 | 35.638 | 23.285 | -62.001 | 1.00 | 0.00 | C | N |
| ATOM | 10198 | CD2 | HSD | A | 207 | 34.336 | 23.103 | -62.428 | 1.00 | 0.00 | C | C |
| ATOM | 10199 | C   | HSD | A | 207 | 31.127 | 23.796 | -65.790 | 1.00 | 0.00 | C | C |
| ATOM | 10200 | O   | HSD | A | 207 | 30.336 | 22.856 | -65.735 | 1.00 | 0.00 | C | O |
| ATOM | 10201 | N   | ILE | A | 208 | 30.773 | 25.004 | -66.270 | 1.00 | 0.00 | C | N |
| ATOM | 10202 | CA  | ILE | A | 208 | 29.425 | 25.337 | -66.628 | 1.00 | 0.00 | C | C |

|      |       |     |           |        |        |         |      |      |   |   |
|------|-------|-----|-----------|--------|--------|---------|------|------|---|---|
| ATOM | 10203 | CB  | ILE A 208 | 29.286 | 26.774 | -67.054 | 1.00 | 0.00 | C | C |
| ATOM | 10204 | CG2 | ILE A 208 | 27.880 | 26.975 | -67.640 | 1.00 | 0.00 | C | C |
| ATOM | 10205 | CG1 | ILE A 208 | 29.607 | 27.713 | -65.874 | 1.00 | 0.00 | C | C |
| ATOM | 10206 | CD  | ILE A 208 | 29.750 | 29.182 | -66.274 | 1.00 | 0.00 | C | C |
| ATOM | 10207 | C   | ILE A 208 | 28.938 | 24.468 | -67.750 | 1.00 | 0.00 | C | C |
| ATOM | 10208 | O   | ILE A 208 | 27.790 | 24.021 | -67.733 | 1.00 | 0.00 | C | O |
| ATOM | 10209 | N   | ALA A 209 | 29.792 | 24.200 | -68.753 | 1.00 | 0.00 | C | N |
| ATOM | 10210 | CA  | ALA A 209 | 29.384 | 23.436 | -69.901 | 1.00 | 0.00 | C | C |
| ATOM | 10211 | CB  | ALA A 209 | 30.514 | 23.260 | -70.928 | 1.00 | 0.00 | C | C |
| ATOM | 10212 | C   | ALA A 209 | 28.961 | 22.073 | -69.460 | 1.00 | 0.00 | C | C |
| ATOM | 10213 | O   | ALA A 209 | 28.001 | 21.514 | -69.990 | 1.00 | 0.00 | C | O |
| ATOM | 10214 | N   | ILE A 210 | 29.706 | 21.486 | -68.510 | 1.00 | 0.00 | C | N |
| ATOM | 10215 | CA  | ILE A 210 | 29.394 | 20.178 | -68.008 | 1.00 | 0.00 | C | C |
| ATOM | 10216 | CB  | ILE A 210 | 30.480 | 19.624 | -67.134 | 1.00 | 0.00 | C | C |
| ATOM | 10217 | CG2 | ILE A 210 | 29.996 | 18.290 | -66.540 | 1.00 | 0.00 | C | C |
| ATOM | 10218 | CG1 | ILE A 210 | 31.781 | 19.495 | -67.939 | 1.00 | 0.00 | C | C |
| ATOM | 10219 | CD  | ILE A 210 | 33.004 | 19.208 | -67.074 | 1.00 | 0.00 | C | C |
| ATOM | 10220 | C   | ILE A 210 | 28.127 | 20.225 | -67.213 | 1.00 | 0.00 | C | C |
| ATOM | 10221 | O   | ILE A 210 | 27.246 | 19.385 | -67.379 | 1.00 | 0.00 | C | O |
| ATOM | 10222 | N   | GLU A 211 | 27.987 | 21.243 | -66.345 | 1.00 | 0.00 | C | N |
| ATOM | 10223 | CA  | GLU A 211 | 26.826 | 21.342 | -65.509 | 1.00 | 0.00 | C | C |
| ATOM | 10224 | CB  | GLU A 211 | 26.875 | 22.591 | -64.617 | 1.00 | 0.00 | C | C |
| ATOM | 10225 | CG  | GLU A 211 | 27.938 | 22.447 | -63.524 | 1.00 | 0.00 | C | C |
| ATOM | 10226 | CD  | GLU A 211 | 28.219 | 23.802 | -62.901 | 1.00 | 0.00 | C | C |
| ATOM | 10227 | OE1 | GLU A 211 | 27.979 | 24.833 | -63.586 | 1.00 | 0.00 | C | O |
| ATOM | 10228 | OE2 | GLU A 211 | 28.692 | 23.828 | -61.734 | 1.00 | 0.00 | C | O |
| ATOM | 10229 | C   | GLU A 211 | 25.631 | 21.381 | -66.411 | 1.00 | 0.00 | C | C |
| ATOM | 10230 | O   | GLU A 211 | 24.571 | 20.852 | -66.087 | 1.00 | 0.00 | C | O |
| ATOM | 10231 | N   | ARG A 212 | 25.794 | 22.029 | -67.573 | 1.00 | 0.00 | C | N |
| ATOM | 10232 | CA  | ARG A 212 | 24.803 | 22.174 | -68.601 | 1.00 | 0.00 | C | C |
| ATOM | 10233 | CB  | ARG A 212 | 25.181 | 23.262 | -69.621 | 1.00 | 0.00 | C | C |
| ATOM | 10234 | CG  | ARG A 212 | 25.267 | 24.647 | -68.976 | 1.00 | 0.00 | C | C |
| ATOM | 10235 | CD  | ARG A 212 | 24.076 | 24.955 | -68.064 | 1.00 | 0.00 | C | C |
| ATOM | 10236 | NE  | ARG A 212 | 24.240 | 26.340 | -67.542 | 1.00 | 0.00 | C | N |
| ATOM | 10237 | CZ  | ARG A 212 | 24.124 | 26.583 | -66.206 | 1.00 | 0.00 | C | C |
| ATOM | 10238 | NH1 | ARG A 212 | 23.917 | 25.547 | -65.340 | 1.00 | 0.00 | C | N |
| ATOM | 10239 | NH2 | ARG A 212 | 24.211 | 27.862 | -65.734 | 1.00 | 0.00 | C | N |
| ATOM | 10240 | C   | ARG A 212 | 24.574 | 20.884 | -69.334 | 1.00 | 0.00 | C | C |

|      |       |     |           |        |        |         |      |      |   |   |
|------|-------|-----|-----------|--------|--------|---------|------|------|---|---|
| ATOM | 10241 | O   | ARG A 212 | 23.543 | 20.721 | -69.986 | 1.00 | 0.00 | C | O |
| ATOM | 10242 | N   | ARG A 213 | 25.540 | 19.945 | -69.287 | 1.00 | 0.00 | C | N |
| ATOM | 10243 | CA  | ARG A 213 | 25.423 | 18.704 | -70.003 | 1.00 | 0.00 | C | C |
| ATOM | 10244 | CB  | ARG A 213 | 24.092 | 17.982 | -69.755 | 1.00 | 0.00 | C | C |
| ATOM | 10245 | CG  | ARG A 213 | 23.905 | 17.537 | -68.311 | 1.00 | 0.00 | C | C |
| ATOM | 10246 | CD  | ARG A 213 | 22.587 | 16.801 | -68.068 | 1.00 | 0.00 | C | C |
| ATOM | 10247 | NE  | ARG A 213 | 22.590 | 16.393 | -66.639 | 1.00 | 0.00 | C | N |
| ATOM | 10248 | CZ  | ARG A 213 | 23.172 | 15.217 | -66.262 | 1.00 | 0.00 | C | C |
| ATOM | 10249 | NH1 | ARG A 213 | 23.701 | 14.370 | -67.192 | 1.00 | 0.00 | C | N |
| ATOM | 10250 | NH2 | ARG A 213 | 23.232 | 14.902 | -64.939 | 1.00 | 0.00 | C | N |
| ATOM | 10251 | C   | ARG A 213 | 25.491 | 18.972 | -71.472 | 1.00 | 0.00 | C | C |
| ATOM | 10252 | O   | ARG A 213 | 24.750 | 18.368 | -72.248 | 1.00 | 0.00 | C | O |
| ATOM | 10253 | N   | ASN A 214 | 26.374 | 19.896 | -71.907 | 1.00 | 0.00 | C | N |
| ATOM | 10254 | CA  | ASN A 214 | 26.460 | 20.086 | -73.326 | 1.00 | 0.00 | C | C |
| ATOM | 10255 | CB  | ASN A 214 | 26.046 | 21.485 | -73.847 | 1.00 | 0.00 | C | C |
| ATOM | 10256 | CG  | ASN A 214 | 26.905 | 22.614 | -73.305 | 1.00 | 0.00 | C | C |
| ATOM | 10257 | OD1 | ASN A 214 | 27.911 | 22.437 | -72.622 | 1.00 | 0.00 | C | O |
| ATOM | 10258 | ND2 | ASN A 214 | 26.463 | 23.862 | -73.616 | 1.00 | 0.00 | C | N |
| ATOM | 10259 | C   | ASN A 214 | 27.811 | 19.677 | -73.826 | 1.00 | 0.00 | C | C |
| ATOM | 10260 | O   | ASN A 214 | 28.843 | 20.292 | -73.558 | 1.00 | 0.00 | C | O |
| ATOM | 10261 | N   | MET A 215 | 27.821 | 18.582 | -74.601 | 1.00 | 0.00 | C | N |
| ATOM | 10262 | CA  | MET A 215 | 29.038 | 18.006 | -75.090 | 1.00 | 0.00 | C | C |
| ATOM | 10263 | CB  | MET A 215 | 28.771 | 16.713 | -75.879 | 1.00 | 0.00 | C | C |
| ATOM | 10264 | CG  | MET A 215 | 29.838 | 15.624 | -75.715 | 1.00 | 0.00 | C | C |
| ATOM | 10265 | SD  | MET A 215 | 31.531 | 16.052 | -76.205 | 1.00 | 0.00 | C | S |
| ATOM | 10266 | CE  | MET A 215 | 31.935 | 17.013 | -74.720 | 1.00 | 0.00 | C | C |
| ATOM | 10267 | C   | MET A 215 | 29.687 | 19.000 | -76.003 | 1.00 | 0.00 | C | C |
| ATOM | 10268 | O   | MET A 215 | 30.891 | 19.234 | -75.933 | 1.00 | 0.00 | C | O |
| ATOM | 10269 | N   | ALA A 216 | 28.880 | 19.666 | -76.846 | 1.00 | 0.00 | C | N |
| ATOM | 10270 | CA  | ALA A 216 | 29.439 | 20.532 | -77.839 | 1.00 | 0.00 | C | C |
| ATOM | 10271 | CB  | ALA A 216 | 28.361 | 21.247 | -78.661 | 1.00 | 0.00 | C | C |
| ATOM | 10272 | C   | ALA A 216 | 30.266 | 21.593 | -77.179 | 1.00 | 0.00 | C | C |
| ATOM | 10273 | O   | ALA A 216 | 31.367 | 21.887 | -77.641 | 1.00 | 0.00 | C | O |
| ATOM | 10274 | N   | LEU A 217 | 29.760 | 22.202 | -76.091 | 1.00 | 0.00 | C | N |
| ATOM | 10275 | CA  | LEU A 217 | 30.522 | 23.225 | -75.432 | 1.00 | 0.00 | C | C |
| ATOM | 10276 | CB  | LEU A 217 | 29.743 | 24.081 | -74.417 | 1.00 | 0.00 | C | C |
| ATOM | 10277 | CG  | LEU A 217 | 28.722 | 25.033 | -75.067 | 1.00 | 0.00 | C | C |
| ATOM | 10278 | CD1 | LEU A 217 | 28.221 | 26.082 | -74.061 | 1.00 | 0.00 | C | C |

|      |       |               |        |        |         |      |      |   |   |
|------|-------|---------------|--------|--------|---------|------|------|---|---|
| ATOM | 10279 | CD2 LEU A 217 | 29.281 | 25.659 | -76.355 | 1.00 | 0.00 | C | C |
| ATOM | 10280 | C LEU A 217   | 31.705 | 22.646 | -74.731 | 1.00 | 0.00 | C | C |
| ATOM | 10281 | O LEU A 217   | 32.753 | 23.283 | -74.653 | 1.00 | 0.00 | C | O |
| ATOM | 10282 | N VAL A 218   | 31.568 | 21.437 | -74.153 | 1.00 | 0.00 | C | N |
| ATOM | 10283 | CA VAL A 218  | 32.708 | 20.867 | -73.496 | 1.00 | 0.00 | C | C |
| ATOM | 10284 | CB VAL A 218  | 32.426 | 19.512 | -72.911 | 1.00 | 0.00 | C | C |
| ATOM | 10285 | CG1 VAL A 218 | 33.748 | 18.900 | -72.419 | 1.00 | 0.00 | C | C |
| ATOM | 10286 | CG2 VAL A 218 | 31.366 | 19.669 | -71.808 | 1.00 | 0.00 | C | C |
| ATOM | 10287 | C VAL A 218   | 33.767 | 20.697 | -74.537 | 1.00 | 0.00 | C | C |
| ATOM | 10288 | O VAL A 218   | 34.905 | 21.132 | -74.366 | 1.00 | 0.00 | C | O |
| ATOM | 10289 | N THR A 219   | 33.387 | 20.124 | -75.693 | 1.00 | 0.00 | C | N |
| ATOM | 10290 | CA THR A 219  | 34.332 | 19.838 | -76.732 | 1.00 | 0.00 | C | C |
| ATOM | 10291 | CB THR A 219  | 33.677 | 19.303 | -77.973 | 1.00 | 0.00 | C | C |
| ATOM | 10292 | OG1 THR A 219 | 32.919 | 18.142 | -77.668 | 1.00 | 0.00 | C | O |
| ATOM | 10293 | CG2 THR A 219 | 34.769 | 18.961 | -79.001 | 1.00 | 0.00 | C | C |
| ATOM | 10294 | C THR A 219   | 34.999 | 21.112 | -77.135 | 1.00 | 0.00 | C | C |
| ATOM | 10295 | O THR A 219   | 36.220 | 21.169 | -77.263 | 1.00 | 0.00 | C | O |
| ATOM | 10296 | N LEU A 220   | 34.212 | 22.183 | -77.327 | 1.00 | 0.00 | C | N |
| ATOM | 10297 | CA LEU A 220  | 34.787 | 23.397 | -77.829 | 1.00 | 0.00 | C | C |
| ATOM | 10298 | CB LEU A 220  | 33.737 | 24.491 | -78.090 | 1.00 | 0.00 | C | C |
| ATOM | 10299 | CG LEU A 220  | 34.326 | 25.794 | -78.661 | 1.00 | 0.00 | C | C |
| ATOM | 10300 | CD1 LEU A 220 | 34.976 | 25.556 | -80.034 | 1.00 | 0.00 | C | C |
| ATOM | 10301 | CD2 LEU A 220 | 33.274 | 26.914 | -78.697 | 1.00 | 0.00 | C | C |
| ATOM | 10302 | C LEU A 220   | 35.792 | 23.939 | -76.856 | 1.00 | 0.00 | C | C |
| ATOM | 10303 | O LEU A 220   | 36.899 | 24.295 | -77.250 | 1.00 | 0.00 | C | O |
| ATOM | 10304 | N LEU A 221   | 35.453 | 23.985 | -75.551 | 1.00 | 0.00 | C | N |
| ATOM | 10305 | CA LEU A 221  | 36.335 | 24.586 | -74.584 | 1.00 | 0.00 | C | C |
| ATOM | 10306 | CB LEU A 221  | 35.729 | 24.698 | -73.176 | 1.00 | 0.00 | C | C |
| ATOM | 10307 | CG LEU A 221  | 34.746 | 25.875 | -73.028 | 1.00 | 0.00 | C | C |
| ATOM | 10308 | CD1 LEU A 221 | 33.621 | 25.828 | -74.070 | 1.00 | 0.00 | C | C |
| ATOM | 10309 | CD2 LEU A 221 | 34.211 | 25.960 | -71.592 | 1.00 | 0.00 | C | C |
| ATOM | 10310 | C LEU A 221   | 37.631 | 23.844 | -74.487 | 1.00 | 0.00 | C | C |
| ATOM | 10311 | O LEU A 221   | 38.689 | 24.462 | -74.390 | 1.00 | 0.00 | C | O |
| ATOM | 10312 | N VAL A 222   | 37.583 | 22.501 | -74.512 | 1.00 | 0.00 | C | N |
| ATOM | 10313 | CA VAL A 222  | 38.765 | 21.690 | -74.400 | 1.00 | 0.00 | C | C |
| ATOM | 10314 | CB VAL A 222  | 38.455 | 20.221 | -74.392 | 1.00 | 0.00 | C | C |
| ATOM | 10315 | CG1 VAL A 222 | 39.776 | 19.437 | -74.460 | 1.00 | 0.00 | C | C |
| ATOM | 10316 | CG2 VAL A 222 | 37.616 | 19.908 | -73.141 | 1.00 | 0.00 | C | C |

|      |       |     |           |        |        |         |      |      |   |   |
|------|-------|-----|-----------|--------|--------|---------|------|------|---|---|
| ATOM | 10317 | C   | VAL A 222 | 39.680 | 21.957 | -75.561 | 1.00 | 0.00 | C | C |
| ATOM | 10318 | O   | VAL A 222 | 40.899 | 21.975 | -75.404 | 1.00 | 0.00 | C | O |
| ATOM | 10319 | N   | GLU A 223 | 39.117 | 22.136 | -76.773 | 1.00 | 0.00 | C | N |
| ATOM | 10320 | CA  | GLU A 223 | 39.915 | 22.384 | -77.945 | 1.00 | 0.00 | C | C |
| ATOM | 10321 | CB  | GLU A 223 | 39.107 | 22.348 | -79.253 | 1.00 | 0.00 | C | C |
| ATOM | 10322 | CG  | GLU A 223 | 38.639 | 20.935 | -79.606 | 1.00 | 0.00 | C | C |
| ATOM | 10323 | CD  | GLU A 223 | 38.023 | 20.956 | -80.996 | 1.00 | 0.00 | C | C |
| ATOM | 10324 | OE1 | GLU A 223 | 37.648 | 22.061 | -81.467 | 1.00 | 0.00 | C | O |
| ATOM | 10325 | OE2 | GLU A 223 | 37.923 | 19.859 | -81.607 | 1.00 | 0.00 | C | O |
| ATOM | 10326 | C   | GLU A 223 | 40.579 | 23.721 | -77.825 | 1.00 | 0.00 | C | C |
| ATOM | 10327 | O   | GLU A 223 | 41.692 | 23.922 | -78.306 | 1.00 | 0.00 | C | O |
| ATOM | 10328 | N   | ASN A 224 | 39.870 | 24.680 | -77.208 | 1.00 | 0.00 | C | N |
| ATOM | 10329 | CA  | ASN A 224 | 40.304 | 26.023 | -76.940 | 1.00 | 0.00 | C | C |
| ATOM | 10330 | CB  | ASN A 224 | 39.171 | 26.932 | -76.450 | 1.00 | 0.00 | C | C |
| ATOM | 10331 | CG  | ASN A 224 | 38.175 | 27.043 | -77.587 | 1.00 | 0.00 | C | C |
| ATOM | 10332 | OD1 | ASN A 224 | 38.540 | 27.194 | -78.751 | 1.00 | 0.00 | C | O |
| ATOM | 10333 | ND2 | ASN A 224 | 36.868 | 26.948 | -77.235 | 1.00 | 0.00 | C | N |
| ATOM | 10334 | C   | ASN A 224 | 41.331 | 25.991 | -75.851 | 1.00 | 0.00 | C | C |
| ATOM | 10335 | O   | ASN A 224 | 41.953 | 27.010 | -75.556 | 1.00 | 0.00 | C | O |
| ATOM | 10336 | N   | GLY A 225 | 41.469 | 24.850 | -75.142 | 1.00 | 0.00 | C | N |
| ATOM | 10337 | CA  | GLY A 225 | 42.520 | 24.792 | -74.166 | 1.00 | 0.00 | C | C |
| ATOM | 10338 | C   | GLY A 225 | 42.022 | 24.999 | -72.769 | 1.00 | 0.00 | C | C |
| ATOM | 10339 | O   | GLY A 225 | 42.778 | 25.451 | -71.912 | 1.00 | 0.00 | C | O |
| ATOM | 10340 | N   | ALA A 226 | 40.740 | 24.688 | -72.490 | 1.00 | 0.00 | C | N |
| ATOM | 10341 | CA  | ALA A 226 | 40.275 | 24.823 | -71.138 | 1.00 | 0.00 | C | C |
| ATOM | 10342 | CB  | ALA A 226 | 38.773 | 24.540 | -70.965 | 1.00 | 0.00 | C | C |
| ATOM | 10343 | C   | ALA A 226 | 41.028 | 23.849 | -70.276 | 1.00 | 0.00 | C | C |
| ATOM | 10344 | O   | ALA A 226 | 41.316 | 22.724 | -70.684 | 1.00 | 0.00 | C | O |
| ATOM | 10345 | N   | ASP A 227 | 41.390 | 24.294 | -69.051 | 1.00 | 0.00 | C | N |
| ATOM | 10346 | CA  | ASP A 227 | 42.094 | 23.479 | -68.103 | 1.00 | 0.00 | C | C |
| ATOM | 10347 | CB  | ASP A 227 | 42.623 | 24.281 | -66.903 | 1.00 | 0.00 | C | C |
| ATOM | 10348 | CG  | ASP A 227 | 43.457 | 23.362 | -66.027 | 1.00 | 0.00 | C | C |
| ATOM | 10349 | OD1 | ASP A 227 | 43.715 | 22.204 | -66.453 | 1.00 | 0.00 | C | O |
| ATOM | 10350 | OD2 | ASP A 227 | 43.847 | 23.805 | -64.914 | 1.00 | 0.00 | C | O |
| ATOM | 10351 | C   | ASP A 227 | 41.133 | 22.459 | -67.571 | 1.00 | 0.00 | C | C |
| ATOM | 10352 | O   | ASP A 227 | 40.127 | 22.795 | -66.948 | 1.00 | 0.00 | C | O |
| ATOM | 10353 | N   | VAL A 228 | 41.443 | 21.176 | -67.814 | 1.00 | 0.00 | C | N |
| ATOM | 10354 | CA  | VAL A 228 | 40.638 | 20.055 | -67.418 | 1.00 | 0.00 | C | C |

|      |       |               |        |        |         |      |      |   |   |
|------|-------|---------------|--------|--------|---------|------|------|---|---|
| ATOM | 10355 | CB VAL A 228  | 41.050 | 18.787 | -68.109 | 1.00 | 0.00 | C | C |
| ATOM | 10356 | CG1 VAL A 228 | 40.259 | 17.611 | -67.511 | 1.00 | 0.00 | C | C |
| ATOM | 10357 | CG2 VAL A 228 | 40.824 | 18.966 | -69.622 | 1.00 | 0.00 | C | C |
| ATOM | 10358 | C VAL A 228   | 40.694 | 19.830 | -65.930 | 1.00 | 0.00 | C | C |
| ATOM | 10359 | O VAL A 228   | 39.787 | 19.234 | -65.351 | 1.00 | 0.00 | C | O |
| ATOM | 10360 | N GLN A 229   | 41.827 | 20.194 | -65.307 | 1.00 | 0.00 | C | N |
| ATOM | 10361 | CA GLN A 229  | 42.121 | 20.050 | -63.903 | 1.00 | 0.00 | C | C |
| ATOM | 10362 | CB GLN A 229  | 43.625 | 19.971 | -63.605 | 1.00 | 0.00 | C | C |
| ATOM | 10363 | CG GLN A 229  | 44.242 | 18.688 | -64.163 | 1.00 | 0.00 | C | C |
| ATOM | 10364 | CD GLN A 229  | 43.393 | 17.526 | -63.662 | 1.00 | 0.00 | C | C |
| ATOM | 10365 | OE1 GLN A 229 | 42.403 | 17.148 | -64.284 | 1.00 | 0.00 | C | O |
| ATOM | 10366 | NE2 GLN A 229 | 43.782 | 16.946 | -62.497 | 1.00 | 0.00 | C | N |
| ATOM | 10367 | C GLN A 229   | 41.500 | 21.094 | -63.007 | 1.00 | 0.00 | C | C |
| ATOM | 10368 | O GLN A 229   | 41.517 | 20.923 | -61.789 | 1.00 | 0.00 | C | O |
| ATOM | 10369 | N ALA A 230   | 41.028 | 22.240 | -63.543 | 1.00 | 0.00 | C | N |
| ATOM | 10370 | CA ALA A 230  | 40.566 | 23.330 | -62.713 | 1.00 | 0.00 | C | C |
| ATOM | 10371 | CB ALA A 230  | 39.921 | 24.477 | -63.513 | 1.00 | 0.00 | C | C |
| ATOM | 10372 | C ALA A 230   | 39.554 | 22.878 | -61.702 | 1.00 | 0.00 | C | C |
| ATOM | 10373 | O ALA A 230   | 38.577 | 22.208 | -62.028 | 1.00 | 0.00 | C | O |
| ATOM | 10374 | N ALA A 231   | 39.751 | 23.292 | -60.431 | 1.00 | 0.00 | C | N |
| ATOM | 10375 | CA ALA A 231  | 38.871 | 22.860 | -59.380 | 1.00 | 0.00 | C | C |
| ATOM | 10376 | CB ALA A 231  | 39.615 | 22.454 | -58.095 | 1.00 | 0.00 | C | C |
| ATOM | 10377 | C ALA A 231   | 37.929 | 23.962 | -59.002 | 1.00 | 0.00 | C | C |
| ATOM | 10378 | O ALA A 231   | 38.346 | 25.068 | -58.660 | 1.00 | 0.00 | C | O |
| ATOM | 10379 | N ALA A 232   | 36.610 | 23.668 | -59.050 | 1.00 | 0.00 | C | N |
| ATOM | 10380 | CA ALA A 232  | 35.649 | 24.638 | -58.610 | 1.00 | 0.00 | C | C |
| ATOM | 10381 | CB ALA A 232  | 34.300 | 24.534 | -59.338 | 1.00 | 0.00 | C | C |
| ATOM | 10382 | C ALA A 232   | 35.407 | 24.310 | -57.164 | 1.00 | 0.00 | C | C |
| ATOM | 10383 | O ALA A 232   | 34.701 | 23.358 | -56.845 | 1.00 | 0.00 | C | O |
| ATOM | 10384 | N HSD A 233   | 36.088 | 25.070 | -56.278 | 1.00 | 0.00 | C | N |
| ATOM | 10385 | CA HSD A 233  | 36.148 | 24.998 | -54.838 | 1.00 | 0.00 | C | C |
| ATOM | 10386 | CB HSD A 233  | 37.541 | 25.369 | -54.301 | 1.00 | 0.00 | C | C |
| ATOM | 10387 | ND1 HSD A 233 | 38.857 | 26.388 | -56.209 | 1.00 | 0.00 | C | N |
| ATOM | 10388 | CG HSD A 233  | 38.161 | 26.524 | -55.027 | 1.00 | 0.00 | C | C |
| ATOM | 10389 | CE1 HSD A 233 | 39.262 | 27.630 | -56.568 | 1.00 | 0.00 | C | C |
| ATOM | 10390 | NE2 HSD A 233 | 38.877 | 28.553 | -55.706 | 1.00 | 0.00 | C | N |
| ATOM | 10391 | CD2 HSD A 233 | 38.185 | 27.851 | -54.735 | 1.00 | 0.00 | C | C |
| ATOM | 10392 | C HSD A 233   | 35.117 | 25.765 | -54.049 | 1.00 | 0.00 | C | C |

|      |       |     |           |        |        |         |      |      |   |   |
|------|-------|-----|-----------|--------|--------|---------|------|------|---|---|
| ATOM | 10393 | O   | HSD A 233 | 35.019 | 25.560 | -52.839 | 1.00 | 0.00 | C | O |
| ATOM | 10394 | N   | GLY A 234 | 34.373 | 26.714 | -54.644 | 1.00 | 0.00 | C | N |
| ATOM | 10395 | CA  | GLY A 234 | 33.531 | 27.596 | -53.863 | 1.00 | 0.00 | C | C |
| ATOM | 10396 | C   | GLY A 234 | 32.485 | 26.841 | -53.094 | 1.00 | 0.00 | C | C |
| ATOM | 10397 | O   | GLY A 234 | 32.256 | 25.657 | -53.315 | 1.00 | 0.00 | C | O |
| ATOM | 10398 | N   | ASP A 235 | 31.793 | 27.553 | -52.176 | 1.00 | 0.00 | C | N |
| ATOM | 10399 | CA  | ASP A 235 | 30.810 | 26.987 | -51.288 | 1.00 | 0.00 | C | C |
| ATOM | 10400 | CB  | ASP A 235 | 30.213 | 28.005 | -50.299 | 1.00 | 0.00 | C | C |
| ATOM | 10401 | CG  | ASP A 235 | 31.251 | 28.239 | -49.206 | 1.00 | 0.00 | C | C |
| ATOM | 10402 | OD1 | ASP A 235 | 32.211 | 27.427 | -49.126 | 1.00 | 0.00 | C | O |
| ATOM | 10403 | OD2 | ASP A 235 | 31.097 | 29.225 | -48.437 | 1.00 | 0.00 | C | O |
| ATOM | 10404 | C   | ASP A 235 | 29.699 | 26.373 | -52.084 | 1.00 | 0.00 | C | C |
| ATOM | 10405 | O   | ASP A 235 | 29.019 | 25.461 | -51.616 | 1.00 | 0.00 | C | O |
| ATOM | 10406 | N   | PHE A 236 | 29.476 | 26.867 | -53.312 | 1.00 | 0.00 | C | N |
| ATOM | 10407 | CA  | PHE A 236 | 28.447 | 26.339 | -54.163 | 1.00 | 0.00 | C | C |
| ATOM | 10408 | CB  | PHE A 236 | 28.314 | 27.115 | -55.488 | 1.00 | 0.00 | C | C |
| ATOM | 10409 | CG  | PHE A 236 | 27.327 | 26.400 | -56.348 | 1.00 | 0.00 | C | C |
| ATOM | 10410 | CD1 | PHE A 236 | 25.976 | 26.538 | -56.134 | 1.00 | 0.00 | C | C |
| ATOM | 10411 | CE1 | PHE A 236 | 25.067 | 25.872 | -56.926 | 1.00 | 0.00 | C | C |
| ATOM | 10412 | CZ  | PHE A 236 | 25.509 | 25.056 | -57.939 | 1.00 | 0.00 | C | C |
| ATOM | 10413 | CD2 | PHE A 236 | 27.760 | 25.573 | -57.358 | 1.00 | 0.00 | C | C |
| ATOM | 10414 | CE2 | PHE A 236 | 26.858 | 24.907 | -58.154 | 1.00 | 0.00 | C | C |
| ATOM | 10415 | C   | PHE A 236 | 28.751 | 24.902 | -54.469 | 1.00 | 0.00 | C | C |
| ATOM | 10416 | O   | PHE A 236 | 27.850 | 24.109 | -54.725 | 1.00 | 0.00 | C | O |
| ATOM | 10417 | N   | PHE A 237 | 30.049 | 24.573 | -54.541 | 1.00 | 0.00 | C | N |
| ATOM | 10418 | CA  | PHE A 237 | 30.639 | 23.303 | -54.857 | 1.00 | 0.00 | C | C |
| ATOM | 10419 | CB  | PHE A 237 | 32.037 | 23.483 | -55.461 | 1.00 | 0.00 | C | C |
| ATOM | 10420 | CG  | PHE A 237 | 31.771 | 24.320 | -56.668 | 1.00 | 0.00 | C | C |
| ATOM | 10421 | CD1 | PHE A 237 | 31.191 | 23.770 | -57.789 | 1.00 | 0.00 | C | C |
| ATOM | 10422 | CE1 | PHE A 237 | 30.937 | 24.541 | -58.899 | 1.00 | 0.00 | C | C |
| ATOM | 10423 | CZ  | PHE A 237 | 31.261 | 25.876 | -58.902 | 1.00 | 0.00 | C | C |
| ATOM | 10424 | CD2 | PHE A 237 | 32.090 | 25.659 | -56.678 | 1.00 | 0.00 | C | C |
| ATOM | 10425 | CE2 | PHE A 237 | 31.837 | 26.434 | -57.787 | 1.00 | 0.00 | C | C |
| ATOM | 10426 | C   | PHE A 237 | 30.671 | 22.317 | -53.724 | 1.00 | 0.00 | C | C |
| ATOM | 10427 | O   | PHE A 237 | 31.024 | 21.164 | -53.963 | 1.00 | 0.00 | C | O |
| ATOM | 10428 | N   | LYS A 238 | 30.457 | 22.755 | -52.461 | 1.00 | 0.00 | C | N |
| ATOM | 10429 | CA  | LYS A 238 | 30.514 | 21.862 | -51.332 | 1.00 | 0.00 | C | C |
| ATOM | 10430 | CB  | LYS A 238 | 31.499 | 22.322 | -50.244 | 1.00 | 0.00 | C | C |

|      |       |     |           |        |        |         |      |      |   |   |
|------|-------|-----|-----------|--------|--------|---------|------|------|---|---|
| ATOM | 10431 | CG  | LYS A 238 | 32.965 | 22.166 | -50.654 | 1.00 | 0.00 | C | C |
| ATOM | 10432 | CD  | LYS A 238 | 33.943 | 22.961 | -49.784 | 1.00 | 0.00 | C | C |
| ATOM | 10433 | CE  | LYS A 238 | 33.548 | 23.035 | -48.307 | 1.00 | 0.00 | C | C |
| ATOM | 10434 | NZ  | LYS A 238 | 32.480 | 24.040 | -48.114 | 1.00 | 0.00 | C | N |
| ATOM | 10435 | C   | LYS A 238 | 29.158 | 21.706 | -50.697 | 1.00 | 0.00 | C | C |
| ATOM | 10436 | O   | LYS A 238 | 28.157 | 22.240 | -51.174 | 1.00 | 0.00 | C | O |
| ATOM | 10437 | N   | LYS A 239 | 29.129 | 20.940 | -49.579 | 1.00 | 0.00 | C | N |
| ATOM | 10438 | CA  | LYS A 239 | 27.938 | 20.560 | -48.869 | 1.00 | 0.00 | C | C |
| ATOM | 10439 | CB  | LYS A 239 | 28.234 | 19.694 | -47.632 | 1.00 | 0.00 | C | C |
| ATOM | 10440 | CG  | LYS A 239 | 28.888 | 18.356 | -47.987 | 1.00 | 0.00 | C | C |
| ATOM | 10441 | CD  | LYS A 239 | 29.530 | 17.638 | -46.798 | 1.00 | 0.00 | C | C |
| ATOM | 10442 | CE  | LYS A 239 | 30.231 | 16.331 | -47.181 | 1.00 | 0.00 | C | C |
| ATOM | 10443 | NZ  | LYS A 239 | 30.923 | 15.757 | -46.004 | 1.00 | 0.00 | C | N |
| ATOM | 10444 | C   | LYS A 239 | 27.182 | 21.767 | -48.429 | 1.00 | 0.00 | C | C |
| ATOM | 10445 | O   | LYS A 239 | 27.736 | 22.757 | -47.952 | 1.00 | 0.00 | C | O |
| ATOM | 10446 | N   | THR A 240 | 25.848 | 21.651 | -48.567 | 1.00 | 0.00 | C | N |
| ATOM | 10447 | CA  | THR A 240 | 24.862 | 22.658 | -48.339 | 1.00 | 0.00 | C | C |
| ATOM | 10448 | CB  | THR A 240 | 23.511 | 22.109 | -48.712 | 1.00 | 0.00 | C | C |
| ATOM | 10449 | OG1 | THR A 240 | 22.548 | 23.135 | -48.881 | 1.00 | 0.00 | C | O |
| ATOM | 10450 | CG2 | THR A 240 | 23.069 | 21.116 | -47.625 | 1.00 | 0.00 | C | C |
| ATOM | 10451 | C   | THR A 240 | 24.889 | 23.062 | -46.894 | 1.00 | 0.00 | C | C |
| ATOM | 10452 | O   | THR A 240 | 24.975 | 22.233 | -45.992 | 1.00 | 0.00 | C | O |
| ATOM | 10453 | N   | LYS A 241 | 24.856 | 24.389 | -46.680 | 1.00 | 0.00 | C | N |
| ATOM | 10454 | CA  | LYS A 241 | 24.838 | 25.101 | -45.434 | 1.00 | 0.00 | C | C |
| ATOM | 10455 | CB  | LYS A 241 | 25.015 | 26.615 | -45.617 | 1.00 | 0.00 | C | C |
| ATOM | 10456 | CG  | LYS A 241 | 26.460 | 27.000 | -45.927 | 1.00 | 0.00 | C | C |
| ATOM | 10457 | CD  | LYS A 241 | 26.625 | 28.417 | -46.474 | 1.00 | 0.00 | C | C |
| ATOM | 10458 | CE  | LYS A 241 | 25.871 | 29.486 | -45.683 | 1.00 | 0.00 | C | C |
| ATOM | 10459 | NZ  | LYS A 241 | 24.422 | 29.436 | -45.982 | 1.00 | 0.00 | C | N |
| ATOM | 10460 | C   | LYS A 241 | 23.578 | 24.886 | -44.643 | 1.00 | 0.00 | C | C |
| ATOM | 10461 | O   | LYS A 241 | 23.662 | 24.812 | -43.417 | 1.00 | 0.00 | C | O |
| ATOM | 10462 | N   | GLY A 242 | 22.373 | 24.745 | -45.253 | 1.00 | 0.00 | C | N |
| ATOM | 10463 | CA  | GLY A 242 | 22.072 | 24.682 | -46.656 | 1.00 | 0.00 | C | C |
| ATOM | 10464 | C   | GLY A 242 | 22.326 | 25.969 | -47.375 | 1.00 | 0.00 | C | C |
| ATOM | 10465 | O   | GLY A 242 | 21.631 | 26.960 | -47.164 | 1.00 | 0.00 | C | O |
| ATOM | 10466 | N   | ARG A 243 | 23.374 | 25.990 | -48.229 | 1.00 | 0.00 | C | N |
| ATOM | 10467 | CA  | ARG A 243 | 23.621 | 27.119 | -49.064 | 1.00 | 0.00 | C | C |
| ATOM | 10468 | CB  | ARG A 243 | 25.069 | 27.232 | -49.565 | 1.00 | 0.00 | C | C |



|      |       |     |           |        |        |         |      |      |   |   |
|------|-------|-----|-----------|--------|--------|---------|------|------|---|---|
| ATOM | 10469 | CG  | ARG A 243 | 25.298 | 28.510 | -50.370 | 1.00 | 0.00 | C | C |
| ATOM | 10470 | CD  | ARG A 243 | 26.686 | 29.126 | -50.199 | 1.00 | 0.00 | C | C |
| ATOM | 10471 | NE  | ARG A 243 | 26.656 | 29.897 | -48.927 | 1.00 | 0.00 | C | N |
| ATOM | 10472 | CZ  | ARG A 243 | 27.614 | 30.829 | -48.655 | 1.00 | 0.00 | C | C |
| ATOM | 10473 | NH1 | ARG A 243 | 28.614 | 31.074 | -49.553 | 1.00 | 0.00 | C | N |
| ATOM | 10474 | NH2 | ARG A 243 | 27.571 | 31.516 | -47.476 | 1.00 | 0.00 | C | N |
| ATOM | 10475 | C   | ARG A 243 | 22.679 | 27.129 | -50.229 | 1.00 | 0.00 | C | C |
| ATOM | 10476 | O   | ARG A 243 | 22.008 | 28.144 | -50.420 | 1.00 | 0.00 | C | O |
| ATOM | 10477 | N   | PRO A 244 | 22.519 | 26.091 | -51.035 | 1.00 | 0.00 | C | N |
| ATOM | 10478 | CD  | PRO A 244 | 21.171 | 25.888 | -51.540 | 1.00 | 0.00 | C | C |
| ATOM | 10479 | CA  | PRO A 244 | 23.264 | 24.835 | -51.007 | 1.00 | 0.00 | C | C |
| ATOM | 10480 | CB  | PRO A 244 | 22.354 | 23.809 | -51.688 | 1.00 | 0.00 | C | C |
| ATOM | 10481 | CG  | PRO A 244 | 20.943 | 24.377 | -51.560 | 1.00 | 0.00 | C | C |
| ATOM | 10482 | C   | PRO A 244 | 24.623 | 24.936 | -51.666 | 1.00 | 0.00 | C | C |
| ATOM | 10483 | O   | PRO A 244 | 24.967 | 26.027 | -52.114 | 1.00 | 0.00 | C | O |
| ATOM | 10484 | N   | GLY A 245 | 25.404 | 23.825 | -51.786 | 1.00 | 0.00 | C | N |
| ATOM | 10485 | CA  | GLY A 245 | 24.998 | 22.585 | -52.417 | 1.00 | 0.00 | C | C |
| ATOM | 10486 | C   | GLY A 245 | 25.093 | 22.815 | -53.898 | 1.00 | 0.00 | C | C |
| ATOM | 10487 | O   | GLY A 245 | 24.561 | 23.809 | -54.393 | 1.00 | 0.00 | C | O |
| ATOM | 10488 | N   | PHE A 246 | 25.682 | 21.879 | -54.693 | 1.00 | 0.00 | C | N |
| ATOM | 10489 | CA  | PHE A 246 | 26.025 | 20.516 | -54.359 | 1.00 | 0.00 | C | C |
| ATOM | 10490 | CB  | PHE A 246 | 25.027 | 19.569 | -55.057 | 1.00 | 0.00 | C | C |
| ATOM | 10491 | CG  | PHE A 246 | 25.577 | 18.203 | -55.274 | 1.00 | 0.00 | C | C |
| ATOM | 10492 | CD1 | PHE A 246 | 25.593 | 17.238 | -54.292 | 1.00 | 0.00 | C | C |
| ATOM | 10493 | CE1 | PHE A 246 | 26.105 | 15.989 | -54.560 | 1.00 | 0.00 | C | C |
| ATOM | 10494 | CZ  | PHE A 246 | 26.600 | 15.691 | -55.809 | 1.00 | 0.00 | C | C |
| ATOM | 10495 | CD2 | PHE A 246 | 26.065 | 17.892 | -56.522 | 1.00 | 0.00 | C | C |
| ATOM | 10496 | CE2 | PHE A 246 | 26.579 | 16.647 | -56.797 | 1.00 | 0.00 | C | C |
| ATOM | 10497 | C   | PHE A 246 | 27.433 | 20.149 | -54.750 | 1.00 | 0.00 | C | C |
| ATOM | 10498 | O   | PHE A 246 | 28.021 | 20.737 | -55.658 | 1.00 | 0.00 | C | O |
| ATOM | 10499 | N   | TYR A 247 | 27.977 | 19.102 | -54.074 | 1.00 | 0.00 | C | N |
| ATOM | 10500 | CA  | TYR A 247 | 29.373 | 18.745 | -54.154 | 1.00 | 0.00 | C | C |
| ATOM | 10501 | CB  | TYR A 247 | 29.959 | 18.690 | -52.735 | 1.00 | 0.00 | C | C |
| ATOM | 10502 | CG  | TYR A 247 | 31.247 | 17.957 | -52.717 | 1.00 | 0.00 | C | C |
| ATOM | 10503 | CD1 | TYR A 247 | 32.445 | 18.582 | -52.969 | 1.00 | 0.00 | C | C |
| ATOM | 10504 | CE1 | TYR A 247 | 33.615 | 17.856 | -52.930 | 1.00 | 0.00 | C | C |
| ATOM | 10505 | CZ  | TYR A 247 | 33.582 | 16.511 | -52.638 | 1.00 | 0.00 | C | C |
| ATOM | 10506 | OH  | TYR A 247 | 34.770 | 15.759 | -52.592 | 1.00 | 0.00 | C | O |

|      |       |               |        |        |         |      |      |   |   |
|------|-------|---------------|--------|--------|---------|------|------|---|---|
| ATOM | 10507 | CD2 TYR A 247 | 31.226 | 16.616 | -52.427 | 1.00 | 0.00 | C | C |
| ATOM | 10508 | CE2 TYR A 247 | 32.385 | 15.889 | -52.385 | 1.00 | 0.00 | C | C |
| ATOM | 10509 | C TYR A 247   | 29.627 | 17.433 | -54.854 | 1.00 | 0.00 | C | C |
| ATOM | 10510 | O TYR A 247   | 29.273 | 16.359 | -54.379 | 1.00 | 0.00 | C | O |
| ATOM | 10511 | N PHE A 248   | 30.153 | 17.544 | -56.088 | 1.00 | 0.00 | C | N |
| ATOM | 10512 | CA PHE A 248  | 30.644 | 16.567 | -57.031 | 1.00 | 0.00 | C | C |
| ATOM | 10513 | CB PHE A 248  | 30.204 | 16.872 | -58.464 | 1.00 | 0.00 | C | C |
| ATOM | 10514 | CG PHE A 248  | 30.630 | 18.255 | -58.782 | 1.00 | 0.00 | C | C |
| ATOM | 10515 | CD1 PHE A 248 | 29.830 | 19.314 | -58.426 | 1.00 | 0.00 | C | C |
| ATOM | 10516 | CE1 PHE A 248 | 30.213 | 20.601 | -58.718 | 1.00 | 0.00 | C | C |
| ATOM | 10517 | CZ PHE A 248  | 31.403 | 20.830 | -59.366 | 1.00 | 0.00 | C | C |
| ATOM | 10518 | CD2 PHE A 248 | 31.824 | 18.490 | -59.423 | 1.00 | 0.00 | C | C |
| ATOM | 10519 | CE2 PHE A 248 | 32.210 | 19.775 | -59.719 | 1.00 | 0.00 | C | C |
| ATOM | 10520 | C PHE A 248   | 32.121 | 16.399 | -56.965 | 1.00 | 0.00 | C | C |
| ATOM | 10521 | O PHE A 248   | 32.732 | 15.758 | -57.818 | 1.00 | 0.00 | C | O |
| ATOM | 10522 | N GLY A 249   | 32.709 | 17.260 | -56.146 | 1.00 | 0.00 | C | N |
| ATOM | 10523 | CA GLY A 249  | 34.066 | 17.434 | -55.808 | 1.00 | 0.00 | C | C |
| ATOM | 10524 | C GLY A 249   | 34.828 | 18.054 | -56.932 | 1.00 | 0.00 | C | C |
| ATOM | 10525 | O GLY A 249   | 35.462 | 17.333 | -57.692 | 1.00 | 0.00 | C | O |
| ATOM | 10526 | N GLU A 250   | 34.605 | 19.358 | -57.173 | 1.00 | 0.00 | C | N |
| ATOM | 10527 | CA GLU A 250  | 35.509 | 20.322 | -57.760 | 1.00 | 0.00 | C | C |
| ATOM | 10528 | CB GLU A 250  | 36.659 | 20.630 | -56.792 | 1.00 | 0.00 | C | C |
| ATOM | 10529 | CG GLU A 250  | 36.163 | 21.153 | -55.443 | 1.00 | 0.00 | C | C |
| ATOM | 10530 | CD GLU A 250  | 37.370 | 21.429 | -54.559 | 1.00 | 0.00 | C | C |
| ATOM | 10531 | OE1 GLU A 250 | 38.513 | 21.369 | -55.088 | 1.00 | 0.00 | C | O |
| ATOM | 10532 | OE2 GLU A 250 | 37.167 | 21.709 | -53.349 | 1.00 | 0.00 | C | O |
| ATOM | 10533 | C GLU A 250   | 36.137 | 20.101 | -59.118 | 1.00 | 0.00 | C | C |
| ATOM | 10534 | O GLU A 250   | 36.434 | 21.090 | -59.792 | 1.00 | 0.00 | C | O |
| ATOM | 10535 | N LEU A 251   | 36.293 | 18.864 | -59.622 | 1.00 | 0.00 | C | N |
| ATOM | 10536 | CA LEU A 251  | 37.058 | 18.675 | -60.837 | 1.00 | 0.00 | C | C |
| ATOM | 10537 | CB LEU A 251  | 38.126 | 17.569 | -60.724 | 1.00 | 0.00 | C | C |
| ATOM | 10538 | CG LEU A 251  | 39.290 | 17.853 | -59.758 | 1.00 | 0.00 | C | C |
| ATOM | 10539 | CD1 LEU A 251 | 40.252 | 16.657 | -59.708 | 1.00 | 0.00 | C | C |
| ATOM | 10540 | CD2 LEU A 251 | 40.027 | 19.154 | -60.117 | 1.00 | 0.00 | C | C |
| ATOM | 10541 | C LEU A 251   | 36.123 | 18.201 | -61.898 | 1.00 | 0.00 | C | C |
| ATOM | 10542 | O LEU A 251   | 35.250 | 17.381 | -61.627 | 1.00 | 0.00 | C | O |
| ATOM | 10543 | N PRO A 252   | 36.335 | 18.643 | -63.112 | 1.00 | 0.00 | C | N |
| ATOM | 10544 | CD PRO A 252  | 37.244 | 19.742 | -63.390 | 1.00 | 0.00 | C | C |

|      |       |     |           |        |        |         |      |      |   |   |
|------|-------|-----|-----------|--------|--------|---------|------|------|---|---|
| ATOM | 10545 | CA  | PRO A 252 | 35.468 | 18.350 | -64.218 | 1.00 | 0.00 | C | C |
| ATOM | 10546 | CB  | PRO A 252 | 36.113 | 19.023 | -65.428 | 1.00 | 0.00 | C | C |
| ATOM | 10547 | CG  | PRO A 252 | 36.881 | 20.210 | -64.811 | 1.00 | 0.00 | C | C |
| ATOM | 10548 | C   | PRO A 252 | 35.163 | 16.892 | -64.382 | 1.00 | 0.00 | C | C |
| ATOM | 10549 | O   | PRO A 252 | 33.998 | 16.561 | -64.586 | 1.00 | 0.00 | C | O |
| ATOM | 10550 | N   | LEU A 253 | 36.164 | 16.003 | -64.275 | 1.00 | 0.00 | C | N |
| ATOM | 10551 | CA  | LEU A 253 | 35.901 | 14.597 | -64.409 | 1.00 | 0.00 | C | C |
| ATOM | 10552 | CB  | LEU A 253 | 37.162 | 13.731 | -64.254 | 1.00 | 0.00 | C | C |
| ATOM | 10553 | CG  | LEU A 253 | 36.893 | 12.219 | -64.399 | 1.00 | 0.00 | C | C |
| ATOM | 10554 | CD1 | LEU A 253 | 36.544 | 11.826 | -65.839 | 1.00 | 0.00 | C | C |
| ATOM | 10555 | CD2 | LEU A 253 | 38.047 | 11.391 | -63.830 | 1.00 | 0.00 | C | C |
| ATOM | 10556 | C   | LEU A 253 | 34.966 | 14.187 | -63.307 | 1.00 | 0.00 | C | C |
| ATOM | 10557 | O   | LEU A 253 | 34.007 | 13.452 | -63.538 | 1.00 | 0.00 | C | O |
| ATOM | 10558 | N   | SER A 254 | 35.215 | 14.674 | -62.076 | 1.00 | 0.00 | C | N |
| ATOM | 10559 | CA  | SER A 254 | 34.432 | 14.283 | -60.936 | 1.00 | 0.00 | C | C |
| ATOM | 10560 | CB  | SER A 254 | 34.923 | 14.941 | -59.637 | 1.00 | 0.00 | C | C |
| ATOM | 10561 | OG  | SER A 254 | 36.241 | 14.496 | -59.348 | 1.00 | 0.00 | C | O |
| ATOM | 10562 | C   | SER A 254 | 33.015 | 14.707 | -61.159 | 1.00 | 0.00 | C | C |
| ATOM | 10563 | O   | SER A 254 | 32.081 | 13.947 | -60.910 | 1.00 | 0.00 | C | O |
| ATOM | 10564 | N   | LEU A 255 | 32.832 | 15.941 | -61.652 | 1.00 | 0.00 | C | N |
| ATOM | 10565 | CA  | LEU A 255 | 31.529 | 16.472 | -61.919 | 1.00 | 0.00 | C | C |
| ATOM | 10566 | CB  | LEU A 255 | 31.602 | 17.906 | -62.486 | 1.00 | 0.00 | C | C |
| ATOM | 10567 | CG  | LEU A 255 | 30.231 | 18.538 | -62.798 | 1.00 | 0.00 | C | C |
| ATOM | 10568 | CD1 | LEU A 255 | 29.388 | 18.691 | -61.527 | 1.00 | 0.00 | C | C |
| ATOM | 10569 | CD2 | LEU A 255 | 30.381 | 19.870 | -63.558 | 1.00 | 0.00 | C | C |
| ATOM | 10570 | C   | LEU A 255 | 30.863 | 15.616 | -62.950 | 1.00 | 0.00 | C | C |
| ATOM | 10571 | O   | LEU A 255 | 29.722 | 15.187 | -62.780 | 1.00 | 0.00 | C | O |
| ATOM | 10572 | N   | ALA A 256 | 31.593 | 15.285 | -64.030 | 1.00 | 0.00 | C | N |
| ATOM | 10573 | CA  | ALA A 256 | 31.003 | 14.571 | -65.131 | 1.00 | 0.00 | C | C |
| ATOM | 10574 | CB  | ALA A 256 | 31.997 | 14.310 | -66.276 | 1.00 | 0.00 | C | C |
| ATOM | 10575 | C   | ALA A 256 | 30.498 | 13.244 | -64.653 | 1.00 | 0.00 | C | C |
| ATOM | 10576 | O   | ALA A 256 | 29.461 | 12.770 | -65.116 | 1.00 | 0.00 | C | O |
| ATOM | 10577 | N   | ALA A 257 | 31.264 | 12.574 | -63.770 | 1.00 | 0.00 | C | N |
| ATOM | 10578 | CA  | ALA A 257 | 30.865 | 11.291 | -63.258 | 1.00 | 0.00 | C | C |
| ATOM | 10579 | CB  | ALA A 257 | 32.012 | 10.597 | -62.497 | 1.00 | 0.00 | C | C |
| ATOM | 10580 | C   | ALA A 257 | 29.684 | 11.388 | -62.327 | 1.00 | 0.00 | C | C |
| ATOM | 10581 | O   | ALA A 257 | 28.696 | 10.670 | -62.493 | 1.00 | 0.00 | C | O |
| ATOM | 10582 | N   | CYS A 258 | 29.725 | 12.330 | -61.358 | 1.00 | 0.00 | C | N |

|      |       |     |           |        |        |         |      |      |   |   |
|------|-------|-----|-----------|--------|--------|---------|------|------|---|---|
| ATOM | 10583 | CA  | CYS A 258 | 28.733 | 12.445 | -60.318 | 1.00 | 0.00 | C | C |
| ATOM | 10584 | CB  | CYS A 258 | 29.049 | 13.551 | -59.294 | 1.00 | 0.00 | C | C |
| ATOM | 10585 | SG  | CYS A 258 | 30.458 | 13.136 | -58.222 | 1.00 | 0.00 | C | S |
| ATOM | 10586 | C   | CYS A 258 | 27.401 | 12.756 | -60.915 | 1.00 | 0.00 | C | C |
| ATOM | 10587 | O   | CYS A 258 | 26.360 | 12.429 | -60.351 | 1.00 | 0.00 | C | O |
| ATOM | 10588 | N   | THR A 259 | 27.416 | 13.484 | -62.038 | 1.00 | 0.00 | C | N |
| ATOM | 10589 | CA  | THR A 259 | 26.275 | 13.868 | -62.820 | 1.00 | 0.00 | C | C |
| ATOM | 10590 | CB  | THR A 259 | 26.540 | 15.044 | -63.717 | 1.00 | 0.00 | C | C |
| ATOM | 10591 | OG1 | THR A 259 | 27.564 | 14.740 | -64.650 | 1.00 | 0.00 | C | O |
| ATOM | 10592 | CG2 | THR A 259 | 26.953 | 16.240 | -62.841 | 1.00 | 0.00 | C | C |
| ATOM | 10593 | C   | THR A 259 | 25.804 | 12.722 | -63.660 | 1.00 | 0.00 | C | C |
| ATOM | 10594 | O   | THR A 259 | 24.782 | 12.829 | -64.337 | 1.00 | 0.00 | C | O |
| ATOM | 10595 | N   | ASN A 260 | 26.578 | 11.619 | -63.706 | 1.00 | 0.00 | C | N |
| ATOM | 10596 | CA  | ASN A 260 | 26.239 | 10.471 | -64.494 | 1.00 | 0.00 | C | C |
| ATOM | 10597 | CB  | ASN A 260 | 24.902 | 9.823  | -64.084 | 1.00 | 0.00 | C | C |
| ATOM | 10598 | CG  | ASN A 260 | 24.925 | 8.387  | -64.585 | 1.00 | 0.00 | C | C |
| ATOM | 10599 | OD1 | ASN A 260 | 25.958 | 7.723  | -64.524 | 1.00 | 0.00 | C | O |
| ATOM | 10600 | ND2 | ASN A 260 | 23.764 | 7.897  | -65.096 | 1.00 | 0.00 | C | N |
| ATOM | 10601 | C   | ASN A 260 | 26.209 | 10.823 | -65.949 | 1.00 | 0.00 | C | C |
| ATOM | 10602 | O   | ASN A 260 | 25.208 | 10.639 | -66.640 | 1.00 | 0.00 | C | O |
| ATOM | 10603 | N   | GLN A 261 | 27.317 | 11.401 | -66.451 | 1.00 | 0.00 | C | N |
| ATOM | 10604 | CA  | GLN A 261 | 27.388 | 11.634 | -67.863 | 1.00 | 0.00 | C | C |
| ATOM | 10605 | CB  | GLN A 261 | 27.160 | 13.108 | -68.252 | 1.00 | 0.00 | C | C |
| ATOM | 10606 | CG  | GLN A 261 | 28.026 | 14.136 | -67.534 | 1.00 | 0.00 | C | C |
| ATOM | 10607 | CD  | GLN A 261 | 27.363 | 15.487 | -67.781 | 1.00 | 0.00 | C | C |
| ATOM | 10608 | OE1 | GLN A 261 | 26.780 | 15.719 | -68.839 | 1.00 | 0.00 | C | O |
| ATOM | 10609 | NE2 | GLN A 261 | 27.442 | 16.402 | -66.779 | 1.00 | 0.00 | C | N |
| ATOM | 10610 | C   | GLN A 261 | 28.662 | 11.035 | -68.376 | 1.00 | 0.00 | C | C |
| ATOM | 10611 | O   | GLN A 261 | 29.716 | 11.666 | -68.442 | 1.00 | 0.00 | C | O |
| ATOM | 10612 | N   | LEU A 262 | 28.547 | 9.756  | -68.795 | 1.00 | 0.00 | C | N |
| ATOM | 10613 | CA  | LEU A 262 | 29.668 | 8.937  | -69.154 | 1.00 | 0.00 | C | C |
| ATOM | 10614 | CB  | LEU A 262 | 29.307 | 7.471  | -69.418 | 1.00 | 0.00 | C | C |
| ATOM | 10615 | CG  | LEU A 262 | 30.548 | 6.641  | -69.788 | 1.00 | 0.00 | C | C |
| ATOM | 10616 | CD1 | LEU A 262 | 31.545 | 6.577  | -68.620 | 1.00 | 0.00 | C | C |
| ATOM | 10617 | CD2 | LEU A 262 | 30.158 | 5.257  | -70.317 | 1.00 | 0.00 | C | C |
| ATOM | 10618 | C   | LEU A 262 | 30.397 | 9.434  | -70.356 | 1.00 | 0.00 | C | C |
| ATOM | 10619 | O   | LEU A 262 | 31.627 | 9.431  | -70.364 | 1.00 | 0.00 | C | O |
| ATOM | 10620 | N   | GLY A 263 | 29.680 | 9.897  | -71.399 | 1.00 | 0.00 | C | N |

|      |       |     |           |        |        |         |      |      |   |   |
|------|-------|-----|-----------|--------|--------|---------|------|------|---|---|
| ATOM | 10621 | CA  | GLY A 263 | 30.346 | 10.248 | -72.622 | 1.00 | 0.00 | C | C |
| ATOM | 10622 | C   | GLY A 263 | 31.363 | 11.308 | -72.347 | 1.00 | 0.00 | C | C |
| ATOM | 10623 | O   | GLY A 263 | 32.469 | 11.271 | -72.885 | 1.00 | 0.00 | C | O |
| ATOM | 10624 | N   | ILE A 264 | 31.004 | 12.296 | -71.512 | 1.00 | 0.00 | C | N |
| ATOM | 10625 | CA  | ILE A 264 | 31.904 | 13.360 | -71.178 | 1.00 | 0.00 | C | C |
| ATOM | 10626 | CB  | ILE A 264 | 31.244 | 14.508 | -70.466 | 1.00 | 0.00 | C | C |
| ATOM | 10627 | CG2 | ILE A 264 | 32.339 | 15.506 | -70.055 | 1.00 | 0.00 | C | C |
| ATOM | 10628 | CG1 | ILE A 264 | 30.175 | 15.133 | -71.380 | 1.00 | 0.00 | C | C |
| ATOM | 10629 | CD  | ILE A 264 | 29.374 | 16.253 | -70.715 | 1.00 | 0.00 | C | C |
| ATOM | 10630 | C   | ILE A 264 | 33.034 | 12.824 | -70.352 | 1.00 | 0.00 | C | C |
| ATOM | 10631 | O   | ILE A 264 | 34.168 | 13.286 | -70.472 | 1.00 | 0.00 | C | O |
| ATOM | 10632 | N   | VAL A 265 | 32.760 | 11.849 | -69.458 | 1.00 | 0.00 | C | N |
| ATOM | 10633 | CA  | VAL A 265 | 33.835 | 11.298 | -68.683 | 1.00 | 0.00 | C | C |
| ATOM | 10634 | CB  | VAL A 265 | 33.404 | 10.166 | -67.786 | 1.00 | 0.00 | C | C |
| ATOM | 10635 | CG1 | VAL A 265 | 34.653 | 9.503  | -67.180 | 1.00 | 0.00 | C | C |
| ATOM | 10636 | CG2 | VAL A 265 | 32.446 | 10.722 | -66.721 | 1.00 | 0.00 | C | C |
| ATOM | 10637 | C   | VAL A 265 | 34.845 | 10.747 | -69.644 | 1.00 | 0.00 | C | C |
| ATOM | 10638 | O   | VAL A 265 | 36.044 | 10.980 | -69.492 | 1.00 | 0.00 | C | O |
| ATOM | 10639 | N   | LYS A 266 | 34.381 | 10.014 | -70.675 | 1.00 | 0.00 | C | N |
| ATOM | 10640 | CA  | LYS A 266 | 35.291 | 9.433  | -71.624 | 1.00 | 0.00 | C | C |
| ATOM | 10641 | CB  | LYS A 266 | 34.590 | 8.548  | -72.672 | 1.00 | 0.00 | C | C |
| ATOM | 10642 | CG  | LYS A 266 | 34.055 | 7.230  | -72.100 | 1.00 | 0.00 | C | C |
| ATOM | 10643 | CD  | LYS A 266 | 33.155 | 6.449  | -73.059 | 1.00 | 0.00 | C | C |
| ATOM | 10644 | CE  | LYS A 266 | 32.716 | 5.083  | -72.517 | 1.00 | 0.00 | C | C |
| ATOM | 10645 | NZ  | LYS A 266 | 31.884 | 4.379  | -73.518 | 1.00 | 0.00 | C | N |
| ATOM | 10646 | C   | LYS A 266 | 36.026 | 10.517 | -72.352 | 1.00 | 0.00 | C | C |
| ATOM | 10647 | O   | LYS A 266 | 37.247 | 10.477 | -72.494 | 1.00 | 0.00 | C | O |
| ATOM | 10648 | N   | PHE A 267 | 35.297 | 11.555 | -72.786 | 1.00 | 0.00 | C | N |
| ATOM | 10649 | CA  | PHE A 267 | 35.859 | 12.631 | -73.551 | 1.00 | 0.00 | C | C |
| ATOM | 10650 | CB  | PHE A 267 | 34.783 | 13.689 | -73.879 | 1.00 | 0.00 | C | C |
| ATOM | 10651 | CG  | PHE A 267 | 35.380 | 14.833 | -74.623 | 1.00 | 0.00 | C | C |
| ATOM | 10652 | CD1 | PHE A 267 | 35.924 | 15.897 | -73.939 | 1.00 | 0.00 | C | C |
| ATOM | 10653 | CE1 | PHE A 267 | 36.472 | 16.961 | -74.615 | 1.00 | 0.00 | C | C |
| ATOM | 10654 | CZ  | PHE A 267 | 36.479 | 16.972 | -75.989 | 1.00 | 0.00 | C | C |
| ATOM | 10655 | CD2 | PHE A 267 | 35.385 | 14.855 | -75.999 | 1.00 | 0.00 | C | C |
| ATOM | 10656 | CE2 | PHE A 267 | 35.935 | 15.917 | -76.680 | 1.00 | 0.00 | C | C |
| ATOM | 10657 | C   | PHE A 267 | 36.938 | 13.281 | -72.745 | 1.00 | 0.00 | C | C |
| ATOM | 10658 | O   | PHE A 267 | 37.976 | 13.662 | -73.284 | 1.00 | 0.00 | C | O |

|      |       |     |           |        |        |         |      |      |   |   |
|------|-------|-----|-----------|--------|--------|---------|------|------|---|---|
| ATOM | 10659 | N   | LEU A 268 | 36.719 | 13.454 | -71.428 | 1.00 | 0.00 | C | N |
| ATOM | 10660 | CA  | LEU A 268 | 37.722 | 14.126 | -70.650 | 1.00 | 0.00 | C | C |
| ATOM | 10661 | CB  | LEU A 268 | 37.298 | 14.356 | -69.187 | 1.00 | 0.00 | C | C |
| ATOM | 10662 | CG  | LEU A 268 | 36.134 | 15.350 | -69.014 | 1.00 | 0.00 | C | C |
| ATOM | 10663 | CD1 | LEU A 268 | 35.772 | 15.526 | -67.531 | 1.00 | 0.00 | C | C |
| ATOM | 10664 | CD2 | LEU A 268 | 36.426 | 16.691 | -69.706 | 1.00 | 0.00 | C | C |
| ATOM | 10665 | C   | LEU A 268 | 38.992 | 13.324 | -70.630 | 1.00 | 0.00 | C | C |
| ATOM | 10666 | O   | LEU A 268 | 40.074 | 13.857 | -70.859 | 1.00 | 0.00 | C | O |
| ATOM | 10667 | N   | LEU A 269 | 38.887 | 12.015 | -70.346 | 1.00 | 0.00 | C | N |
| ATOM | 10668 | CA  | LEU A 269 | 40.038 | 11.166 | -70.225 | 1.00 | 0.00 | C | C |
| ATOM | 10669 | CB  | LEU A 269 | 39.681 | 9.797  | -69.623 | 1.00 | 0.00 | C | C |
| ATOM | 10670 | CG  | LEU A 269 | 39.196 | 9.863  | -68.160 | 1.00 | 0.00 | C | C |
| ATOM | 10671 | CD1 | LEU A 269 | 38.858 | 8.463  | -67.630 | 1.00 | 0.00 | C | C |
| ATOM | 10672 | CD2 | LEU A 269 | 40.206 | 10.592 | -67.258 | 1.00 | 0.00 | C | C |
| ATOM | 10673 | C   | LEU A 269 | 40.726 | 10.914 | -71.543 | 1.00 | 0.00 | C | C |
| ATOM | 10674 | O   | LEU A 269 | 41.952 | 10.835 | -71.599 | 1.00 | 0.00 | C | O |
| ATOM | 10675 | N   | GLN A 270 | 39.939 | 10.679 | -72.612 | 1.00 | 0.00 | C | N |
| ATOM | 10676 | CA  | GLN A 270 | 40.414 | 10.315 | -73.925 | 1.00 | 0.00 | C | C |
| ATOM | 10677 | CB  | GLN A 270 | 39.373 | 9.500  | -74.707 | 1.00 | 0.00 | C | C |
| ATOM | 10678 | CG  | GLN A 270 | 39.138 | 8.134  | -74.057 | 1.00 | 0.00 | C | C |
| ATOM | 10679 | CD  | GLN A 270 | 38.100 | 7.379  | -74.869 | 1.00 | 0.00 | C | C |
| ATOM | 10680 | OE1 | GLN A 270 | 37.660 | 7.837  | -75.921 | 1.00 | 0.00 | C | O |
| ATOM | 10681 | NE2 | GLN A 270 | 37.700 | 6.184  | -74.361 | 1.00 | 0.00 | C | N |
| ATOM | 10682 | C   | GLN A 270 | 40.942 | 11.416 | -74.819 | 1.00 | 0.00 | C | C |
| ATOM | 10683 | O   | GLN A 270 | 41.861 | 11.171 | -75.599 | 1.00 | 0.00 | C | O |
| ATOM | 10684 | N   | ASN A 271 | 40.395 | 12.648 | -74.746 | 1.00 | 0.00 | C | N |
| ATOM | 10685 | CA  | ASN A 271 | 40.662 | 13.665 | -75.744 | 1.00 | 0.00 | C | C |
| ATOM | 10686 | CB  | ASN A 271 | 39.947 | 15.014 | -75.514 | 1.00 | 0.00 | C | C |
| ATOM | 10687 | CG  | ASN A 271 | 40.542 | 15.707 | -74.299 | 1.00 | 0.00 | C | C |
| ATOM | 10688 | OD1 | ASN A 271 | 41.386 | 16.590 | -74.436 | 1.00 | 0.00 | C | O |
| ATOM | 10689 | ND2 | ASN A 271 | 40.090 | 15.311 | -73.083 | 1.00 | 0.00 | C | N |
| ATOM | 10690 | C   | ASN A 271 | 42.122 | 13.949 | -75.948 | 1.00 | 0.00 | C | C |
| ATOM | 10691 | O   | ASN A 271 | 42.970 | 13.692 | -75.096 | 1.00 | 0.00 | C | O |
| ATOM | 10692 | N   | SER A 272 | 42.434 | 14.452 | -77.166 | 1.00 | 0.00 | C | N |
| ATOM | 10693 | CA  | SER A 272 | 43.755 | 14.765 | -77.634 | 1.00 | 0.00 | C | C |
| ATOM | 10694 | CB  | SER A 272 | 43.775 | 15.076 | -79.137 | 1.00 | 0.00 | C | C |
| ATOM | 10695 | OG  | SER A 272 | 43.353 | 13.941 | -79.877 | 1.00 | 0.00 | C | O |
| ATOM | 10696 | C   | SER A 272 | 44.319 | 15.974 | -76.948 | 1.00 | 0.00 | C | C |

|      |       |     |           |        |        |         |      |      |   |   |
|------|-------|-----|-----------|--------|--------|---------|------|------|---|---|
| ATOM | 10697 | O   | SER A 272 | 45.522 | 16.035 | -76.689 | 1.00 | 0.00 | C | O |
| ATOM | 10698 | N   | TRP A 273 | 43.473 | 16.984 | -76.682 | 1.00 | 0.00 | C | N |
| ATOM | 10699 | CA  | TRP A 273 | 43.948 | 18.242 | -76.169 | 1.00 | 0.00 | C | C |
| ATOM | 10700 | CB  | TRP A 273 | 42.865 | 19.325 | -76.190 | 1.00 | 0.00 | C | C |
| ATOM | 10701 | CG  | TRP A 273 | 42.493 | 19.688 | -77.606 | 1.00 | 0.00 | C | C |
| ATOM | 10702 | CD1 | TRP A 273 | 41.536 | 19.140 | -78.409 | 1.00 | 0.00 | C | C |
| ATOM | 10703 | NE1 | TRP A 273 | 41.563 | 19.744 | -79.643 | 1.00 | 0.00 | C | N |
| ATOM | 10704 | CE2 | TRP A 273 | 42.552 | 20.707 | -79.643 | 1.00 | 0.00 | C | C |
| ATOM | 10705 | CD2 | TRP A 273 | 43.151 | 20.695 | -78.383 | 1.00 | 0.00 | C | C |
| ATOM | 10706 | CE3 | TRP A 273 | 44.178 | 21.548 | -78.075 | 1.00 | 0.00 | C | C |
| ATOM | 10707 | CZ3 | TRP A 273 | 44.594 | 22.415 | -79.059 | 1.00 | 0.00 | C | C |
| ATOM | 10708 | CZ2 | TRP A 273 | 42.966 | 21.568 | -80.615 | 1.00 | 0.00 | C | C |
| ATOM | 10709 | CH2 | TRP A 273 | 43.999 | 22.425 | -80.305 | 1.00 | 0.00 | C | C |
| ATOM | 10710 | C   | TRP A 273 | 44.504 | 18.135 | -74.786 | 1.00 | 0.00 | C | C |
| ATOM | 10711 | O   | TRP A 273 | 45.646 | 18.526 | -74.548 | 1.00 | 0.00 | C | O |
| ATOM | 10712 | N   | GLN A 274 | 43.717 | 17.624 | -73.822 | 1.00 | 0.00 | C | N |
| ATOM | 10713 | CA  | GLN A 274 | 44.263 | 17.477 | -72.504 | 1.00 | 0.00 | C | C |
| ATOM | 10714 | CB  | GLN A 274 | 44.137 | 18.749 | -71.647 | 1.00 | 0.00 | C | C |
| ATOM | 10715 | CG  | GLN A 274 | 44.791 | 18.640 | -70.267 | 1.00 | 0.00 | C | C |
| ATOM | 10716 | CD  | GLN A 274 | 44.732 | 20.009 | -69.601 | 1.00 | 0.00 | C | C |
| ATOM | 10717 | OE1 | GLN A 274 | 44.206 | 20.970 | -70.162 | 1.00 | 0.00 | C | O |
| ATOM | 10718 | NE2 | GLN A 274 | 45.300 | 20.107 | -68.369 | 1.00 | 0.00 | C | N |
| ATOM | 10719 | C   | GLN A 274 | 43.501 | 16.377 | -71.841 | 1.00 | 0.00 | C | C |
| ATOM | 10720 | O   | GLN A 274 | 42.311 | 16.511 | -71.562 | 1.00 | 0.00 | C | O |
| ATOM | 10721 | N   | THR A 275 | 44.184 | 15.255 | -71.561 | 1.00 | 0.00 | C | N |
| ATOM | 10722 | CA  | THR A 275 | 43.517 | 14.149 | -70.946 | 1.00 | 0.00 | C | C |
| ATOM | 10723 | CB  | THR A 275 | 44.274 | 12.860 | -71.064 | 1.00 | 0.00 | C | C |
| ATOM | 10724 | OG1 | THR A 275 | 45.533 | 12.970 | -70.414 | 1.00 | 0.00 | C | O |
| ATOM | 10725 | CG2 | THR A 275 | 44.476 | 12.541 | -72.556 | 1.00 | 0.00 | C | C |
| ATOM | 10726 | C   | THR A 275 | 43.406 | 14.469 | -69.495 | 1.00 | 0.00 | C | C |
| ATOM | 10727 | O   | THR A 275 | 44.305 | 15.079 | -68.917 | 1.00 | 0.00 | C | O |
| ATOM | 10728 | N   | ALA A 276 | 42.283 | 14.069 | -68.870 | 1.00 | 0.00 | C | N |
| ATOM | 10729 | CA  | ALA A 276 | 42.108 | 14.348 | -67.479 | 1.00 | 0.00 | C | C |
| ATOM | 10730 | CB  | ALA A 276 | 40.661 | 14.145 | -66.988 | 1.00 | 0.00 | C | C |
| ATOM | 10731 | C   | ALA A 276 | 42.993 | 13.435 | -66.693 | 1.00 | 0.00 | C | C |
| ATOM | 10732 | O   | ALA A 276 | 43.275 | 12.312 | -67.106 | 1.00 | 0.00 | C | O |
| ATOM | 10733 | N   | ASP A 277 | 43.475 | 13.930 | -65.534 | 1.00 | 0.00 | C | N |
| ATOM | 10734 | CA  | ASP A 277 | 44.258 | 13.123 | -64.647 | 1.00 | 0.00 | C | C |

|      |       |     |           |        |        |         |      |      |   |   |
|------|-------|-----|-----------|--------|--------|---------|------|------|---|---|
| ATOM | 10735 | CB  | ASP A 277 | 45.073 | 13.949 | -63.629 | 1.00 | 0.00 | C | C |
| ATOM | 10736 | CG  | ASP A 277 | 45.890 | 13.022 | -62.733 | 1.00 | 0.00 | C | C |
| ATOM | 10737 | OD1 | ASP A 277 | 45.702 | 11.778 | -62.804 | 1.00 | 0.00 | C | O |
| ATOM | 10738 | OD2 | ASP A 277 | 46.721 | 13.561 | -61.953 | 1.00 | 0.00 | C | O |
| ATOM | 10739 | C   | ASP A 277 | 43.246 | 12.338 | -63.875 | 1.00 | 0.00 | C | C |
| ATOM | 10740 | O   | ASP A 277 | 42.517 | 12.880 | -63.049 | 1.00 | 0.00 | C | O |
| ATOM | 10741 | N   | ILE A 278 | 43.194 | 11.023 | -64.132 | 1.00 | 0.00 | C | N |
| ATOM | 10742 | CA  | ILE A 278 | 42.217 | 10.157 | -63.542 | 1.00 | 0.00 | C | C |
| ATOM | 10743 | CB  | ILE A 278 | 42.288 | 8.756  | -64.076 | 1.00 | 0.00 | C | C |
| ATOM | 10744 | CG2 | ILE A 278 | 43.623 | 8.137  | -63.623 | 1.00 | 0.00 | C | C |
| ATOM | 10745 | CG1 | ILE A 278 | 41.045 | 7.955  | -63.649 | 1.00 | 0.00 | C | C |
| ATOM | 10746 | CD  | ILE A 278 | 39.750 | 8.443  | -64.293 | 1.00 | 0.00 | C | C |
| ATOM | 10747 | C   | ILE A 278 | 42.367 | 10.093 | -62.046 | 1.00 | 0.00 | C | C |
| ATOM | 10748 | O   | ILE A 278 | 41.392 | 9.847  | -61.341 | 1.00 | 0.00 | C | O |
| ATOM | 10749 | N   | SER A 279 | 43.609 | 10.178 | -61.535 | 1.00 | 0.00 | C | N |
| ATOM | 10750 | CA  | SER A 279 | 43.909 | 10.062 | -60.128 | 1.00 | 0.00 | C | C |
| ATOM | 10751 | CB  | SER A 279 | 45.308 | 9.473  | -59.881 | 1.00 | 0.00 | C | C |
| ATOM | 10752 | OG  | SER A 279 | 46.307 | 10.355 | -60.369 | 1.00 | 0.00 | C | O |
| ATOM | 10753 | C   | SER A 279 | 43.821 | 11.341 | -59.339 | 1.00 | 0.00 | C | C |
| ATOM | 10754 | O   | SER A 279 | 44.055 | 11.316 | -58.132 | 1.00 | 0.00 | C | O |
| ATOM | 10755 | N   | ALA A 280 | 43.507 | 12.497 | -59.952 | 1.00 | 0.00 | C | N |
| ATOM | 10756 | CA  | ALA A 280 | 43.579 | 13.727 | -59.203 | 1.00 | 0.00 | C | C |
| ATOM | 10757 | CB  | ALA A 280 | 43.212 | 14.969 | -60.033 | 1.00 | 0.00 | C | C |
| ATOM | 10758 | C   | ALA A 280 | 42.666 | 13.696 | -58.011 | 1.00 | 0.00 | C | C |
| ATOM | 10759 | O   | ALA A 280 | 41.636 | 13.024 | -58.000 | 1.00 | 0.00 | C | O |
| ATOM | 10760 | N   | ARG A 281 | 43.065 | 14.421 | -56.943 | 1.00 | 0.00 | C | N |
| ATOM | 10761 | CA  | ARG A 281 | 42.264 | 14.502 | -55.755 | 1.00 | 0.00 | C | C |
| ATOM | 10762 | CB  | ARG A 281 | 42.936 | 13.886 | -54.516 | 1.00 | 0.00 | C | C |
| ATOM | 10763 | CG  | ARG A 281 | 44.356 | 14.384 | -54.256 | 1.00 | 0.00 | C | C |
| ATOM | 10764 | CD  | ARG A 281 | 45.384 | 13.696 | -55.160 | 1.00 | 0.00 | C | C |
| ATOM | 10765 | NE  | ARG A 281 | 46.749 | 14.046 | -54.676 | 1.00 | 0.00 | C | N |
| ATOM | 10766 | CZ  | ARG A 281 | 47.365 | 13.264 | -53.742 | 1.00 | 0.00 | C | C |
| ATOM | 10767 | NH1 | ARG A 281 | 46.724 | 12.166 | -53.239 | 1.00 | 0.00 | C | N |
| ATOM | 10768 | NH2 | ARG A 281 | 48.622 | 13.573 | -53.310 | 1.00 | 0.00 | C | N |
| ATOM | 10769 | C   | ARG A 281 | 41.884 | 15.932 | -55.505 | 1.00 | 0.00 | C | C |
| ATOM | 10770 | O   | ARG A 281 | 42.655 | 16.851 | -55.769 | 1.00 | 0.00 | C | O |
| ATOM | 10771 | N   | ASP A 282 | 40.644 | 16.145 | -55.009 | 1.00 | 0.00 | C | N |
| ATOM | 10772 | CA  | ASP A 282 | 40.159 | 17.476 | -54.765 | 1.00 | 0.00 | C | C |



|      |       |     |           |        |        |         |      |      |   |   |
|------|-------|-----|-----------|--------|--------|---------|------|------|---|---|
| ATOM | 10773 | CB  | ASP A 282 | 38.635 | 17.643 | -54.889 | 1.00 | 0.00 | C | C |
| ATOM | 10774 | CG  | ASP A 282 | 37.901 | 16.768 | -53.887 | 1.00 | 0.00 | C | C |
| ATOM | 10775 | OD1 | ASP A 282 | 38.521 | 16.281 | -52.903 | 1.00 | 0.00 | C | O |
| ATOM | 10776 | OD2 | ASP A 282 | 36.677 | 16.580 | -54.111 | 1.00 | 0.00 | C | O |
| ATOM | 10777 | C   | ASP A 282 | 40.638 | 17.937 | -53.423 | 1.00 | 0.00 | C | C |
| ATOM | 10778 | O   | ASP A 282 | 41.447 | 17.272 | -52.780 | 1.00 | 0.00 | C | O |
| ATOM | 10779 | N   | SER A 283 | 40.128 | 19.095 | -52.955 | 1.00 | 0.00 | C | N |
| ATOM | 10780 | CA  | SER A 283 | 40.617 | 19.708 | -51.751 | 1.00 | 0.00 | C | C |
| ATOM | 10781 | CB  | SER A 283 | 39.803 | 20.946 | -51.343 | 1.00 | 0.00 | C | C |
| ATOM | 10782 | OG  | SER A 283 | 39.929 | 21.957 | -52.333 | 1.00 | 0.00 | C | O |
| ATOM | 10783 | C   | SER A 283 | 40.532 | 18.736 | -50.611 | 1.00 | 0.00 | C | C |
| ATOM | 10784 | O   | SER A 283 | 41.418 | 18.692 | -49.756 | 1.00 | 0.00 | C | O |
| ATOM | 10785 | N   | VAL A 284 | 39.446 | 17.950 | -50.579 | 1.00 | 0.00 | C | N |
| ATOM | 10786 | CA  | VAL A 284 | 39.146 | 16.959 | -49.583 | 1.00 | 0.00 | C | C |
| ATOM | 10787 | CB  | VAL A 284 | 37.748 | 16.429 | -49.724 | 1.00 | 0.00 | C | C |
| ATOM | 10788 | CG1 | VAL A 284 | 37.547 | 15.275 | -48.727 | 1.00 | 0.00 | C | C |
| ATOM | 10789 | CG2 | VAL A 284 | 36.763 | 17.595 | -49.531 | 1.00 | 0.00 | C | C |
| ATOM | 10790 | C   | VAL A 284 | 40.092 | 15.796 | -49.691 | 1.00 | 0.00 | C | C |
| ATOM | 10791 | O   | VAL A 284 | 40.287 | 15.064 | -48.724 | 1.00 | 0.00 | C | O |
| ATOM | 10792 | N   | GLY A 285 | 40.678 | 15.556 | -50.880 | 1.00 | 0.00 | C | N |
| ATOM | 10793 | CA  | GLY A 285 | 41.548 | 14.425 | -51.045 | 1.00 | 0.00 | C | C |
| ATOM | 10794 | C   | GLY A 285 | 40.781 | 13.388 | -51.800 | 1.00 | 0.00 | C | C |
| ATOM | 10795 | O   | GLY A 285 | 41.296 | 12.318 | -52.118 | 1.00 | 0.00 | C | O |
| ATOM | 10796 | N   | ASN A 286 | 39.511 | 13.697 | -52.117 | 1.00 | 0.00 | C | N |
| ATOM | 10797 | CA  | ASN A 286 | 38.678 | 12.749 | -52.796 | 1.00 | 0.00 | C | C |
| ATOM | 10798 | CB  | ASN A 286 | 37.172 | 13.032 | -52.638 | 1.00 | 0.00 | C | C |
| ATOM | 10799 | CG  | ASN A 286 | 36.787 | 12.735 | -51.195 | 1.00 | 0.00 | C | C |
| ATOM | 10800 | OD1 | ASN A 286 | 37.488 | 12.013 | -50.487 | 1.00 | 0.00 | C | O |
| ATOM | 10801 | ND2 | ASN A 286 | 35.634 | 13.300 | -50.750 | 1.00 | 0.00 | C | N |
| ATOM | 10802 | C   | ASN A 286 | 38.969 | 12.716 | -54.259 | 1.00 | 0.00 | C | C |
| ATOM | 10803 | O   | ASN A 286 | 39.189 | 13.742 | -54.901 | 1.00 | 0.00 | C | O |
| ATOM | 10804 | N   | THR A 287 | 38.984 | 11.487 | -54.813 | 1.00 | 0.00 | C | N |
| ATOM | 10805 | CA  | THR A 287 | 39.129 | 11.282 | -56.222 | 1.00 | 0.00 | C | C |
| ATOM | 10806 | CB  | THR A 287 | 39.958 | 10.079 | -56.567 | 1.00 | 0.00 | C | C |
| ATOM | 10807 | OG1 | THR A 287 | 39.343 | 8.904  | -56.066 | 1.00 | 0.00 | C | O |
| ATOM | 10808 | CG2 | THR A 287 | 41.363 | 10.252 | -55.957 | 1.00 | 0.00 | C | C |
| ATOM | 10809 | C   | THR A 287 | 37.741 | 11.059 | -56.739 | 1.00 | 0.00 | C | C |
| ATOM | 10810 | O   | THR A 287 | 36.770 | 11.135 | -55.983 | 1.00 | 0.00 | C | O |

|      |       |     |           |        |        |         |      |      |   |   |
|------|-------|-----|-----------|--------|--------|---------|------|------|---|---|
| ATOM | 10811 | N   | VAL A 288 | 37.616 | 10.769 | -58.049 | 1.00 | 0.00 | C | N |
| ATOM | 10812 | CA  | VAL A 288 | 36.322 | 10.571 | -58.643 | 1.00 | 0.00 | C | C |
| ATOM | 10813 | CB  | VAL A 288 | 36.359 | 10.288 | -60.121 | 1.00 | 0.00 | C | C |
| ATOM | 10814 | CG1 | VAL A 288 | 36.858 | 11.543 | -60.846 | 1.00 | 0.00 | C | C |
| ATOM | 10815 | CG2 | VAL A 288 | 37.225 | 9.048  | -60.381 | 1.00 | 0.00 | C | C |
| ATOM | 10816 | C   | VAL A 288 | 35.655 | 9.420  | -57.963 | 1.00 | 0.00 | C | C |
| ATOM | 10817 | O   | VAL A 288 | 34.436 | 9.422  | -57.791 | 1.00 | 0.00 | C | O |
| ATOM | 10818 | N   | LEU A 289 | 36.435 | 8.390  | -57.592 | 1.00 | 0.00 | C | N |
| ATOM | 10819 | CA  | LEU A 289 | 35.869 | 7.263  | -56.909 | 1.00 | 0.00 | C | C |
| ATOM | 10820 | CB  | LEU A 289 | 36.902 | 6.151  | -56.659 | 1.00 | 0.00 | C | C |
| ATOM | 10821 | CG  | LEU A 289 | 37.503 | 5.583  | -57.964 | 1.00 | 0.00 | C | C |
| ATOM | 10822 | CD1 | LEU A 289 | 38.434 | 4.391  | -57.685 | 1.00 | 0.00 | C | C |
| ATOM | 10823 | CD2 | LEU A 289 | 36.409 | 5.270  | -58.997 | 1.00 | 0.00 | C | C |
| ATOM | 10824 | C   | LEU A 289 | 35.337 | 7.735  | -55.584 | 1.00 | 0.00 | C | C |
| ATOM | 10825 | O   | LEU A 289 | 34.224 | 7.388  | -55.193 | 1.00 | 0.00 | C | O |
| ATOM | 10826 | N   | HSD A 290 | 36.107 | 8.570  | -54.855 | 1.00 | 0.00 | C | N |
| ATOM | 10827 | CA  | HSD A 290 | 35.629 | 9.033  | -53.582 | 1.00 | 0.00 | C | C |
| ATOM | 10828 | CB  | HSD A 290 | 36.634 | 9.928  | -52.835 | 1.00 | 0.00 | C | C |
| ATOM | 10829 | ND1 | HSD A 290 | 37.848 | 8.234  | -51.383 | 1.00 | 0.00 | C | N |
| ATOM | 10830 | CG  | HSD A 290 | 37.854 | 9.194  | -52.369 | 1.00 | 0.00 | C | C |
| ATOM | 10831 | CE1 | HSD A 290 | 39.131 | 7.817  | -51.231 | 1.00 | 0.00 | C | C |
| ATOM | 10832 | NE2 | HSD A 290 | 39.959 | 8.442  | -52.048 | 1.00 | 0.00 | C | N |
| ATOM | 10833 | CD2 | HSD A 290 | 39.152 | 9.309  | -52.765 | 1.00 | 0.00 | C | C |
| ATOM | 10834 | C   | HSD A 290 | 34.376 | 9.846  | -53.769 | 1.00 | 0.00 | C | C |
| ATOM | 10835 | O   | HSD A 290 | 33.398 | 9.676  | -53.042 | 1.00 | 0.00 | C | O |
| ATOM | 10836 | N   | ALA A 291 | 34.358 | 10.741 | -54.773 | 1.00 | 0.00 | C | N |
| ATOM | 10837 | CA  | ALA A 291 | 33.234 | 11.620 | -54.975 | 1.00 | 0.00 | C | C |
| ATOM | 10838 | CB  | ALA A 291 | 33.430 | 12.585 | -56.158 | 1.00 | 0.00 | C | C |
| ATOM | 10839 | C   | ALA A 291 | 31.994 | 10.819 | -55.250 | 1.00 | 0.00 | C | C |
| ATOM | 10840 | O   | ALA A 291 | 30.914 | 11.164 | -54.770 | 1.00 | 0.00 | C | O |
| ATOM | 10841 | N   | LEU A 292 | 32.115 | 9.729  | -56.032 | 1.00 | 0.00 | C | N |
| ATOM | 10842 | CA  | LEU A 292 | 30.988 | 8.911  | -56.389 | 1.00 | 0.00 | C | C |
| ATOM | 10843 | CB  | LEU A 292 | 31.376 | 7.753  | -57.322 | 1.00 | 0.00 | C | C |
| ATOM | 10844 | CG  | LEU A 292 | 31.704 | 8.208  | -58.756 | 1.00 | 0.00 | C | C |
| ATOM | 10845 | CD1 | LEU A 292 | 32.093 | 7.016  | -59.644 | 1.00 | 0.00 | C | C |
| ATOM | 10846 | CD2 | LEU A 292 | 30.535 | 9.016  | -59.348 | 1.00 | 0.00 | C | C |
| ATOM | 10847 | C   | LEU A 292 | 30.392 | 8.322  | -55.148 | 1.00 | 0.00 | C | C |
| ATOM | 10848 | O   | LEU A 292 | 29.174 | 8.278  | -54.997 | 1.00 | 0.00 | C | O |

|      |       |     |           |        |        |         |      |      |   |   |
|------|-------|-----|-----------|--------|--------|---------|------|------|---|---|
| ATOM | 10849 | N   | VAL A 293 | 31.247 | 7.857  | -54.220 | 1.00 | 0.00 | C | N |
| ATOM | 10850 | CA  | VAL A 293 | 30.791 | 7.279  | -52.990 | 1.00 | 0.00 | C | C |
| ATOM | 10851 | CB  | VAL A 293 | 31.923 | 6.828  | -52.116 | 1.00 | 0.00 | C | C |
| ATOM | 10852 | CG1 | VAL A 293 | 31.350 | 6.367  | -50.765 | 1.00 | 0.00 | C | C |
| ATOM | 10853 | CG2 | VAL A 293 | 32.712 | 5.735  | -52.857 | 1.00 | 0.00 | C | C |
| ATOM | 10854 | C   | VAL A 293 | 30.030 | 8.331  | -52.245 | 1.00 | 0.00 | C | C |
| ATOM | 10855 | O   | VAL A 293 | 29.019 | 8.047  | -51.612 | 1.00 | 0.00 | C | O |
| ATOM | 10856 | N   | GLU A 294 | 30.510 | 9.586  | -52.296 | 1.00 | 0.00 | C | N |
| ATOM | 10857 | CA  | GLU A 294 | 29.884 | 10.659 | -51.574 | 1.00 | 0.00 | C | C |
| ATOM | 10858 | CB  | GLU A 294 | 30.711 | 11.957 | -51.596 | 1.00 | 0.00 | C | C |
| ATOM | 10859 | CG  | GLU A 294 | 30.348 | 12.894 | -50.446 | 1.00 | 0.00 | C | C |
| ATOM | 10860 | CD  | GLU A 294 | 30.872 | 12.233 | -49.178 | 1.00 | 0.00 | C | C |
| ATOM | 10861 | OE1 | GLU A 294 | 32.120 | 12.104 | -49.059 | 1.00 | 0.00 | C | O |
| ATOM | 10862 | OE2 | GLU A 294 | 30.037 | 11.836 | -48.325 | 1.00 | 0.00 | C | O |
| ATOM | 10863 | C   | GLU A 294 | 28.529 | 10.957 | -52.145 | 1.00 | 0.00 | C | C |
| ATOM | 10864 | O   | GLU A 294 | 27.621 | 11.367 | -51.425 | 1.00 | 0.00 | C | O |
| ATOM | 10865 | N   | VAL A 295 | 28.371 | 10.800 | -53.472 | 1.00 | 0.00 | C | N |
| ATOM | 10866 | CA  | VAL A 295 | 27.155 | 11.131 | -54.163 | 1.00 | 0.00 | C | C |
| ATOM | 10867 | CB  | VAL A 295 | 27.318 | 11.281 | -55.653 | 1.00 | 0.00 | C | C |
| ATOM | 10868 | CG1 | VAL A 295 | 27.399 | 9.899  | -56.317 | 1.00 | 0.00 | C | C |
| ATOM | 10869 | CG2 | VAL A 295 | 26.175 | 12.165 | -56.178 | 1.00 | 0.00 | C | C |
| ATOM | 10870 | C   | VAL A 295 | 26.048 | 10.143 | -53.887 | 1.00 | 0.00 | C | C |
| ATOM | 10871 | O   | VAL A 295 | 24.878 | 10.475 | -54.075 | 1.00 | 0.00 | C | O |
| ATOM | 10872 | N   | ALA A 296 | 26.370 | 8.886  | -53.504 | 1.00 | 0.00 | C | N |
| ATOM | 10873 | CA  | ALA A 296 | 25.356 | 7.874  | -53.317 | 1.00 | 0.00 | C | C |
| ATOM | 10874 | CB  | ALA A 296 | 25.941 | 6.468  | -53.099 | 1.00 | 0.00 | C | C |
| ATOM | 10875 | C   | ALA A 296 | 24.450 | 8.175  | -52.147 | 1.00 | 0.00 | C | C |
| ATOM | 10876 | O   | ALA A 296 | 24.905 | 8.578  | -51.078 | 1.00 | 0.00 | C | O |
| ATOM | 10877 | N   | ASP A 297 | 23.118 | 8.109  | -52.393 | 1.00 | 0.00 | C | N |
| ATOM | 10878 | CA  | ASP A 297 | 22.054 | 8.231  | -51.421 | 1.00 | 0.00 | C | C |
| ATOM | 10879 | CB  | ASP A 297 | 20.908 | 9.205  | -51.775 | 1.00 | 0.00 | C | C |
| ATOM | 10880 | CG  | ASP A 297 | 20.098 | 8.711  | -52.948 | 1.00 | 0.00 | C | C |
| ATOM | 10881 | OD1 | ASP A 297 | 20.721 | 8.245  | -53.927 | 1.00 | 0.00 | C | O |
| ATOM | 10882 | OD2 | ASP A 297 | 18.843 | 8.812  | -52.892 | 1.00 | 0.00 | C | O |
| ATOM | 10883 | C   | ASP A 297 | 21.484 | 6.924  | -50.925 | 1.00 | 0.00 | C | C |
| ATOM | 10884 | O   | ASP A 297 | 20.586 | 6.933  | -50.082 | 1.00 | 0.00 | C | O |
| ATOM | 10885 | N   | ASN A 298 | 21.894 | 5.769  | -51.487 | 1.00 | 0.00 | C | N |
| ATOM | 10886 | CA  | ASN A 298 | 21.360 | 4.489  | -51.094 | 1.00 | 0.00 | C | C |

|      |       |     |           |        |       |         |      |      |   |   |
|------|-------|-----|-----------|--------|-------|---------|------|------|---|---|
| ATOM | 10887 | CB  | ASN A 298 | 21.373 | 4.268 | -49.573 | 1.00 | 0.00 | C | C |
| ATOM | 10888 | CG  | ASN A 298 | 22.828 | 4.086 | -49.166 | 1.00 | 0.00 | C | C |
| ATOM | 10889 | OD1 | ASN A 298 | 23.557 | 3.310 | -49.782 | 1.00 | 0.00 | C | O |
| ATOM | 10890 | ND2 | ASN A 298 | 23.270 | 4.827 | -48.115 | 1.00 | 0.00 | C | N |
| ATOM | 10891 | C   | ASN A 298 | 19.969 | 4.268 | -51.609 | 1.00 | 0.00 | C | C |
| ATOM | 10892 | O   | ASN A 298 | 19.210 | 3.476 | -51.050 | 1.00 | 0.00 | C | O |
| ATOM | 10893 | N   | THR A 299 | 19.591 | 4.958 | -52.701 | 1.00 | 0.00 | C | N |
| ATOM | 10894 | CA  | THR A 299 | 18.347 | 4.644 | -53.336 | 1.00 | 0.00 | C | C |
| ATOM | 10895 | CB  | THR A 299 | 17.688 | 5.831 | -53.970 | 1.00 | 0.00 | C | C |
| ATOM | 10896 | OG1 | THR A 299 | 16.396 | 5.484 | -54.430 | 1.00 | 0.00 | C | O |
| ATOM | 10897 | CG2 | THR A 299 | 18.541 | 6.324 | -55.140 | 1.00 | 0.00 | C | C |
| ATOM | 10898 | C   | THR A 299 | 18.707 | 3.642 | -54.395 | 1.00 | 0.00 | C | C |
| ATOM | 10899 | O   | THR A 299 | 19.859 | 3.581 | -54.820 | 1.00 | 0.00 | C | O |
| ATOM | 10900 | N   | ALA A 300 | 17.742 | 2.824 | -54.857 | 1.00 | 0.00 | C | N |
| ATOM | 10901 | CA  | ALA A 300 | 18.058 | 1.774 | -55.787 | 1.00 | 0.00 | C | C |
| ATOM | 10902 | CB  | ALA A 300 | 16.835 | 0.915 | -56.155 | 1.00 | 0.00 | C | C |
| ATOM | 10903 | C   | ALA A 300 | 18.606 | 2.342 | -57.058 | 1.00 | 0.00 | C | C |
| ATOM | 10904 | O   | ALA A 300 | 19.591 | 1.840 | -57.598 | 1.00 | 0.00 | C | O |
| ATOM | 10905 | N   | ASP A 301 | 17.984 | 3.421 | -57.562 | 1.00 | 0.00 | C | N |
| ATOM | 10906 | CA  | ASP A 301 | 18.376 | 4.019 | -58.806 | 1.00 | 0.00 | C | C |
| ATOM | 10907 | CB  | ASP A 301 | 17.448 | 5.183 | -59.192 | 1.00 | 0.00 | C | C |
| ATOM | 10908 | CG  | ASP A 301 | 16.049 | 4.619 | -59.412 | 1.00 | 0.00 | C | C |
| ATOM | 10909 | OD1 | ASP A 301 | 15.936 | 3.539 | -60.053 | 1.00 | 0.00 | C | O |
| ATOM | 10910 | OD2 | ASP A 301 | 15.076 | 5.253 | -58.926 | 1.00 | 0.00 | C | O |
| ATOM | 10911 | C   | ASP A 301 | 19.758 | 4.577 | -58.669 | 1.00 | 0.00 | C | C |
| ATOM | 10912 | O   | ASP A 301 | 20.555 | 4.516 | -59.606 | 1.00 | 0.00 | C | O |
| ATOM | 10913 | N   | ASN A 302 | 20.059 | 5.163 | -57.495 | 1.00 | 0.00 | C | N |
| ATOM | 10914 | CA  | ASN A 302 | 21.317 | 5.811 | -57.254 | 1.00 | 0.00 | C | C |
| ATOM | 10915 | CB  | ASN A 302 | 21.374 | 6.481 | -55.886 | 1.00 | 0.00 | C | C |
| ATOM | 10916 | CG  | ASN A 302 | 22.727 | 7.145 | -55.699 | 1.00 | 0.00 | C | C |
| ATOM | 10917 | OD1 | ASN A 302 | 23.705 | 6.485 | -55.349 | 1.00 | 0.00 | C | O |
| ATOM | 10918 | ND2 | ASN A 302 | 22.795 | 8.481 | -55.936 | 1.00 | 0.00 | C | N |
| ATOM | 10919 | C   | ASN A 302 | 22.443 | 4.838 | -57.270 | 1.00 | 0.00 | C | C |
| ATOM | 10920 | O   | ASN A 302 | 23.462 | 5.083 | -57.914 | 1.00 | 0.00 | C | O |
| ATOM | 10921 | N   | THR A 303 | 22.286 | 3.704 | -56.563 | 1.00 | 0.00 | C | N |
| ATOM | 10922 | CA  | THR A 303 | 23.368 | 2.770 | -56.507 | 1.00 | 0.00 | C | C |
| ATOM | 10923 | CB  | THR A 303 | 23.078 | 1.532 | -55.711 | 1.00 | 0.00 | C | C |
| ATOM | 10924 | OG1 | THR A 303 | 21.996 | 0.816 | -56.286 | 1.00 | 0.00 | C | O |

|      |       |               |        |        |         |      |      |   |   |
|------|-------|---------------|--------|--------|---------|------|------|---|---|
| ATOM | 10925 | CG2 THR A 303 | 22.751 | 1.936  | -54.271 | 1.00 | 0.00 | C | C |
| ATOM | 10926 | C THR A 303   | 23.649 | 2.327  | -57.895 | 1.00 | 0.00 | C | C |
| ATOM | 10927 | O THR A 303   | 24.803 | 2.261  | -58.313 | 1.00 | 0.00 | C | O |
| ATOM | 10928 | N LYS A 304   | 22.584 | 2.064  | -58.672 | 1.00 | 0.00 | C | N |
| ATOM | 10929 | CA LYS A 304  | 22.773 | 1.512  | -59.976 | 1.00 | 0.00 | C | C |
| ATOM | 10930 | CB LYS A 304  | 21.454 | 1.325  | -60.750 | 1.00 | 0.00 | C | C |
| ATOM | 10931 | CG LYS A 304  | 20.516 | 0.303  | -60.106 | 1.00 | 0.00 | C | C |
| ATOM | 10932 | CD LYS A 304  | 21.129 | -1.092 | -59.960 | 1.00 | 0.00 | C | C |
| ATOM | 10933 | CE LYS A 304  | 20.244 | -2.080 | -59.198 | 1.00 | 0.00 | C | C |
| ATOM | 10934 | NZ LYS A 304  | 20.917 | -3.395 | -59.100 | 1.00 | 0.00 | C | N |
| ATOM | 10935 | C LYS A 304   | 23.643 | 2.416  | -60.795 | 1.00 | 0.00 | C | C |
| ATOM | 10936 | O LYS A 304   | 24.598 | 1.952  | -61.410 | 1.00 | 0.00 | C | O |
| ATOM | 10937 | N PHE A 305   | 23.355 | 3.732  | -60.829 | 1.00 | 0.00 | C | N |
| ATOM | 10938 | CA PHE A 305  | 24.146 | 4.566  | -61.691 | 1.00 | 0.00 | C | C |
| ATOM | 10939 | CB PHE A 305  | 23.530 | 5.947  | -62.008 | 1.00 | 0.00 | C | C |
| ATOM | 10940 | CG PHE A 305  | 23.689 | 6.887  | -60.868 | 1.00 | 0.00 | C | C |
| ATOM | 10941 | CD1 PHE A 305 | 24.838 | 7.636  | -60.772 | 1.00 | 0.00 | C | C |
| ATOM | 10942 | CE1 PHE A 305 | 25.017 | 8.520  | -59.737 | 1.00 | 0.00 | C | C |
| ATOM | 10943 | CZ PHE A 305  | 24.033 | 8.663  | -58.789 | 1.00 | 0.00 | C | C |
| ATOM | 10944 | CD2 PHE A 305 | 22.704 | 7.037  | -59.922 | 1.00 | 0.00 | C | C |
| ATOM | 10945 | CE2 PHE A 305 | 22.878 | 7.923  | -58.882 | 1.00 | 0.00 | C | C |
| ATOM | 10946 | C PHE A 305   | 25.541 | 4.751  | -61.153 | 1.00 | 0.00 | C | C |
| ATOM | 10947 | O PHE A 305   | 26.503 | 4.763  | -61.918 | 1.00 | 0.00 | C | O |
| ATOM | 10948 | N VAL A 306   | 25.696 | 4.924  | -59.823 | 1.00 | 0.00 | C | N |
| ATOM | 10949 | CA VAL A 306  | 27.002 | 5.150  | -59.259 | 1.00 | 0.00 | C | C |
| ATOM | 10950 | CB VAL A 306  | 26.957 | 5.439  | -57.788 | 1.00 | 0.00 | C | C |
| ATOM | 10951 | CG1 VAL A 306 | 28.399 | 5.512  | -57.257 | 1.00 | 0.00 | C | C |
| ATOM | 10952 | CG2 VAL A 306 | 26.157 | 6.736  | -57.577 | 1.00 | 0.00 | C | C |
| ATOM | 10953 | C VAL A 306   | 27.841 | 3.930  | -59.460 | 1.00 | 0.00 | C | C |
| ATOM | 10954 | O VAL A 306   | 29.004 | 4.013  | -59.851 | 1.00 | 0.00 | C | O |
| ATOM | 10955 | N THR A 307   | 27.233 | 2.753  | -59.237 | 1.00 | 0.00 | C | N |
| ATOM | 10956 | CA THR A 307  | 27.907 | 1.491  | -59.287 | 1.00 | 0.00 | C | C |
| ATOM | 10957 | CB THR A 307  | 26.932 | 0.366  | -59.067 | 1.00 | 0.00 | C | C |
| ATOM | 10958 | OG1 THR A 307 | 26.460 | 0.374  | -57.729 | 1.00 | 0.00 | C | O |
| ATOM | 10959 | CG2 THR A 307 | 27.570 | -0.971 | -59.448 | 1.00 | 0.00 | C | C |
| ATOM | 10960 | C THR A 307   | 28.572 | 1.281  | -60.614 | 1.00 | 0.00 | C | C |
| ATOM | 10961 | O THR A 307   | 29.734 | 0.883  | -60.664 | 1.00 | 0.00 | C | O |
| ATOM | 10962 | N SER A 308   | 27.841 | 1.520  | -61.715 | 1.00 | 0.00 | C | N |

|      |       |     |           |        |        |         |      |      |   |   |
|------|-------|-----|-----------|--------|--------|---------|------|------|---|---|
| ATOM | 10963 | CA  | SER A 308 | 28.325 | 1.316  | -63.054 | 1.00 | 0.00 | C | C |
| ATOM | 10964 | CB  | SER A 308 | 27.187 | 1.366  | -64.085 | 1.00 | 0.00 | C | C |
| ATOM | 10965 | OG  | SER A 308 | 27.705 | 1.164  | -65.385 | 1.00 | 0.00 | C | O |
| ATOM | 10966 | C   | SER A 308 | 29.309 | 2.370  | -63.450 | 1.00 | 0.00 | C | C |
| ATOM | 10967 | O   | SER A 308 | 30.272 | 2.093  | -64.164 | 1.00 | 0.00 | C | O |
| ATOM | 10968 | N   | MET A 309 | 29.085 | 3.624  | -63.024 | 1.00 | 0.00 | C | N |
| ATOM | 10969 | CA  | MET A 309 | 29.989 | 4.667  | -63.405 | 1.00 | 0.00 | C | C |
| ATOM | 10970 | CB  | MET A 309 | 29.550 | 6.069  | -62.959 | 1.00 | 0.00 | C | C |
| ATOM | 10971 | CG  | MET A 309 | 30.533 | 7.153  | -63.401 | 1.00 | 0.00 | C | C |
| ATOM | 10972 | SD  | MET A 309 | 30.696 | 7.313  | -65.207 | 1.00 | 0.00 | C | S |
| ATOM | 10973 | CE  | MET A 309 | 28.957 | 7.731  | -65.511 | 1.00 | 0.00 | C | C |
| ATOM | 10974 | C   | MET A 309 | 31.309 | 4.366  | -62.778 | 1.00 | 0.00 | C | C |
| ATOM | 10975 | O   | MET A 309 | 32.357 | 4.636  | -63.357 | 1.00 | 0.00 | C | O |
| ATOM | 10976 | N   | TYR A 310 | 31.269 | 3.806  | -61.555 | 1.00 | 0.00 | C | N |
| ATOM | 10977 | CA  | TYR A 310 | 32.449 | 3.441  | -60.829 | 1.00 | 0.00 | C | C |
| ATOM | 10978 | CB  | TYR A 310 | 32.069 | 2.807  | -59.474 | 1.00 | 0.00 | C | C |
| ATOM | 10979 | CG  | TYR A 310 | 33.256 | 2.549  | -58.603 | 1.00 | 0.00 | C | C |
| ATOM | 10980 | CD1 | TYR A 310 | 33.757 | 3.544  | -57.798 | 1.00 | 0.00 | C | C |
| ATOM | 10981 | CE1 | TYR A 310 | 34.839 | 3.319  | -56.979 | 1.00 | 0.00 | C | C |
| ATOM | 10982 | CZ  | TYR A 310 | 35.434 | 2.080  | -56.955 | 1.00 | 0.00 | C | C |
| ATOM | 10983 | OH  | TYR A 310 | 36.544 | 1.842  | -56.116 | 1.00 | 0.00 | C | O |
| ATOM | 10984 | CD2 | TYR A 310 | 33.855 | 1.309  | -58.566 | 1.00 | 0.00 | C | C |
| ATOM | 10985 | CE2 | TYR A 310 | 34.939 | 1.076  | -57.750 | 1.00 | 0.00 | C | C |
| ATOM | 10986 | C   | TYR A 310 | 33.161 | 2.405  | -61.651 | 1.00 | 0.00 | C | C |
| ATOM | 10987 | O   | TYR A 310 | 34.360 | 2.514  | -61.903 | 1.00 | 0.00 | C | O |
| ATOM | 10988 | N   | ASN A 311 | 32.414 | 1.398  | -62.142 | 1.00 | 0.00 | C | N |
| ATOM | 10989 | CA  | ASN A 311 | 32.987 | 0.332  | -62.911 | 1.00 | 0.00 | C | C |
| ATOM | 10990 | CB  | ASN A 311 | 31.944 | -0.692 | -63.381 | 1.00 | 0.00 | C | C |
| ATOM | 10991 | CG  | ASN A 311 | 32.699 | -1.852 | -64.014 | 1.00 | 0.00 | C | C |
| ATOM | 10992 | OD1 | ASN A 311 | 33.927 | -1.887 | -64.001 | 1.00 | 0.00 | C | O |
| ATOM | 10993 | ND2 | ASN A 311 | 31.943 | -2.821 | -64.594 | 1.00 | 0.00 | C | N |
| ATOM | 10994 | C   | ASN A 311 | 33.614 | 0.921  | -64.131 | 1.00 | 0.00 | C | C |
| ATOM | 10995 | O   | ASN A 311 | 34.707 | 0.530  | -64.533 | 1.00 | 0.00 | C | O |
| ATOM | 10996 | N   | GLU A 312 | 32.927 | 1.900  | -64.742 | 1.00 | 0.00 | C | N |
| ATOM | 10997 | CA  | GLU A 312 | 33.393 | 2.512  | -65.950 | 1.00 | 0.00 | C | C |
| ATOM | 10998 | CB  | GLU A 312 | 32.436 | 3.595  | -66.474 | 1.00 | 0.00 | C | C |
| ATOM | 10999 | CG  | GLU A 312 | 31.201 | 3.023  | -67.161 | 1.00 | 0.00 | C | C |
| ATOM | 11000 | CD  | GLU A 312 | 31.688 | 2.408  | -68.463 | 1.00 | 0.00 | C | C |

|            |     |           |        |        |         |      |      |   |   |
|------------|-----|-----------|--------|--------|---------|------|------|---|---|
| ATOM 11001 | OE1 | GLU A 312 | 32.661 | 2.958  | -69.040 | 1.00 | 0.00 | C | O |
| ATOM 11002 | OE2 | GLU A 312 | 31.104 | 1.378  | -68.893 | 1.00 | 0.00 | C | O |
| ATOM 11003 | C   | GLU A 312 | 34.707 | 3.179  | -65.707 | 1.00 | 0.00 | C | C |
| ATOM 11004 | O   | GLU A 312 | 35.606 | 3.093  | -66.538 | 1.00 | 0.00 | C | O |
| ATOM 11005 | N   | ILE A 313 | 34.864 | 3.860  | -64.560 | 1.00 | 0.00 | C | N |
| ATOM 11006 | CA  | ILE A 313 | 36.082 | 4.569  | -64.300 | 1.00 | 0.00 | C | C |
| ATOM 11007 | CB  | ILE A 313 | 36.051 | 5.308  | -62.994 | 1.00 | 0.00 | C | C |
| ATOM 11008 | CG2 | ILE A 313 | 37.478 | 5.792  | -62.692 | 1.00 | 0.00 | C | C |
| ATOM 11009 | CG1 | ILE A 313 | 35.008 | 6.440  | -63.031 | 1.00 | 0.00 | C | C |
| ATOM 11010 | CD  | ILE A 313 | 35.309 | 7.513  | -64.076 | 1.00 | 0.00 | C | C |
| ATOM 11011 | C   | ILE A 313 | 37.212 | 3.594  | -64.235 | 1.00 | 0.00 | C | C |
| ATOM 11012 | O   | ILE A 313 | 38.278 | 3.834  | -64.798 | 1.00 | 0.00 | C | O |
| ATOM 11013 | N   | LEU A 314 | 37.007 | 2.459  | -63.541 | 1.00 | 0.00 | C | N |
| ATOM 11014 | CA  | LEU A 314 | 38.068 | 1.506  | -63.391 | 1.00 | 0.00 | C | C |
| ATOM 11015 | CB  | LEU A 314 | 37.734 | 0.357  | -62.424 | 1.00 | 0.00 | C | C |
| ATOM 11016 | CG  | LEU A 314 | 37.633 | 0.808  | -60.953 | 1.00 | 0.00 | C | C |
| ATOM 11017 | CD1 | LEU A 314 | 37.393 | -0.387 | -60.018 | 1.00 | 0.00 | C | C |
| ATOM 11018 | CD2 | LEU A 314 | 38.855 | 1.645  | -60.538 | 1.00 | 0.00 | C | C |
| ATOM 11019 | C   | LEU A 314 | 38.451 | 0.927  | -64.723 | 1.00 | 0.00 | C | C |
| ATOM 11020 | O   | LEU A 314 | 39.635 | 0.798  | -65.025 | 1.00 | 0.00 | C | O |
| ATOM 11021 | N   | MET A 315 | 37.463 | 0.600  | -65.578 | 1.00 | 0.00 | C | N |
| ATOM 11022 | CA  | MET A 315 | 37.760 | 0.001  | -66.848 | 1.00 | 0.00 | C | C |
| ATOM 11023 | CB  | MET A 315 | 36.490 | -0.276 | -67.673 | 1.00 | 0.00 | C | C |
| ATOM 11024 | CG  | MET A 315 | 35.558 | -1.298 | -67.017 | 1.00 | 0.00 | C | C |
| ATOM 11025 | SD  | MET A 315 | 34.045 | -1.658 | -67.957 | 1.00 | 0.00 | C | S |
| ATOM 11026 | CE  | MET A 315 | 33.308 | -0.020 | -67.685 | 1.00 | 0.00 | C | C |
| ATOM 11027 | C   | MET A 315 | 38.617 | 0.958  | -67.618 | 1.00 | 0.00 | C | C |
| ATOM 11028 | O   | MET A 315 | 39.551 | 0.559  | -68.310 | 1.00 | 0.00 | C | O |
| ATOM 11029 | N   | LEU A 316 | 38.301 | 2.258  | -67.535 | 1.00 | 0.00 | C | N |
| ATOM 11030 | CA  | LEU A 316 | 39.059 | 3.279  | -68.203 | 1.00 | 0.00 | C | C |
| ATOM 11031 | CB  | LEU A 316 | 38.381 | 4.664  | -68.156 | 1.00 | 0.00 | C | C |
| ATOM 11032 | CG  | LEU A 316 | 37.257 | 4.875  | -69.198 | 1.00 | 0.00 | C | C |
| ATOM 11033 | CD1 | LEU A 316 | 36.163 | 3.803  | -69.119 | 1.00 | 0.00 | C | C |
| ATOM 11034 | CD2 | LEU A 316 | 36.669 | 6.294  | -69.096 | 1.00 | 0.00 | C | C |
| ATOM 11035 | C   | LEU A 316 | 40.433 | 3.385  | -67.608 | 1.00 | 0.00 | C | C |
| ATOM 11036 | O   | LEU A 316 | 41.408 | 3.601  | -68.326 | 1.00 | 0.00 | C | O |
| ATOM 11037 | N   | GLY A 317 | 40.546 | 3.260  | -66.272 | 1.00 | 0.00 | C | N |
| ATOM 11038 | CA  | GLY A 317 | 41.839 | 3.379  | -65.660 | 1.00 | 0.00 | C | C |

|      |       |     |           |        |        |         |      |      |   |   |
|------|-------|-----|-----------|--------|--------|---------|------|------|---|---|
| ATOM | 11039 | C   | GLY A 317 | 42.718 | 2.278  | -66.163 | 1.00 | 0.00 | C | C |
| ATOM | 11040 | O   | GLY A 317 | 43.864 | 2.509  | -66.546 | 1.00 | 0.00 | C | O |
| ATOM | 11041 | N   | ALA A 318 | 42.191 | 1.040  | -66.190 | 1.00 | 0.00 | C | N |
| ATOM | 11042 | CA  | ALA A 318 | 42.978 | -0.086 | -66.594 | 1.00 | 0.00 | C | C |
| ATOM | 11043 | CB  | ALA A 318 | 42.222 | -1.417 | -66.447 | 1.00 | 0.00 | C | C |
| ATOM | 11044 | C   | ALA A 318 | 43.380 | 0.055  | -68.027 | 1.00 | 0.00 | C | C |
| ATOM | 11045 | O   | ALA A 318 | 44.517 | -0.240 | -68.389 | 1.00 | 0.00 | C | O |
| ATOM | 11046 | N   | LYS A 319 | 42.456 | 0.479  | -68.908 | 1.00 | 0.00 | C | N |
| ATOM | 11047 | CA  | LYS A 319 | 42.864 | 0.578  | -70.276 | 1.00 | 0.00 | C | C |
| ATOM | 11048 | CB  | LYS A 319 | 41.689 | 0.780  | -71.256 | 1.00 | 0.00 | C | C |
| ATOM | 11049 | CG  | LYS A 319 | 40.799 | 1.994  | -70.990 | 1.00 | 0.00 | C | C |
| ATOM | 11050 | CD  | LYS A 319 | 39.864 | 2.312  | -72.159 | 1.00 | 0.00 | C | C |
| ATOM | 11051 | CE  | LYS A 319 | 38.954 | 3.515  | -71.921 | 1.00 | 0.00 | C | C |
| ATOM | 11052 | NZ  | LYS A 319 | 38.052 | 3.690  | -73.081 | 1.00 | 0.00 | C | N |
| ATOM | 11053 | C   | LYS A 319 | 43.879 | 1.671  | -70.471 | 1.00 | 0.00 | C | C |
| ATOM | 11054 | O   | LYS A 319 | 44.943 | 1.429  | -71.042 | 1.00 | 0.00 | C | O |
| ATOM | 11055 | N   | LEU A 320 | 43.589 | 2.902  | -70.002 | 1.00 | 0.00 | C | N |
| ATOM | 11056 | CA  | LEU A 320 | 44.488 | 4.002  | -70.224 | 1.00 | 0.00 | C | C |
| ATOM | 11057 | CB  | LEU A 320 | 43.838 | 5.378  | -69.972 | 1.00 | 0.00 | C | C |
| ATOM | 11058 | CG  | LEU A 320 | 42.820 | 5.786  | -71.062 | 1.00 | 0.00 | C | C |
| ATOM | 11059 | CD1 | LEU A 320 | 41.629 | 4.819  | -71.125 | 1.00 | 0.00 | C | C |
| ATOM | 11060 | CD2 | LEU A 320 | 42.368 | 7.247  | -70.906 | 1.00 | 0.00 | C | C |
| ATOM | 11061 | C   | LEU A 320 | 45.759 | 3.915  | -69.426 | 1.00 | 0.00 | C | C |
| ATOM | 11062 | O   | LEU A 320 | 46.841 | 4.077  | -69.987 | 1.00 | 0.00 | C | O |
| ATOM | 11063 | N   | HSD A 321 | 45.682 | 3.656  | -68.102 | 1.00 | 0.00 | C | N |
| ATOM | 11064 | CA  | HSD A 321 | 46.895 | 3.627  | -67.321 | 1.00 | 0.00 | C | C |
| ATOM | 11065 | CB  | HSD A 321 | 47.059 | 4.891  | -66.461 | 1.00 | 0.00 | C | C |
| ATOM | 11066 | ND1 | HSD A 321 | 48.027 | 6.690  | -67.974 | 1.00 | 0.00 | C | N |
| ATOM | 11067 | CG  | HSD A 321 | 46.966 | 6.134  | -67.297 | 1.00 | 0.00 | C | C |
| ATOM | 11068 | CE1 | HSD A 321 | 47.545 | 7.773  | -68.634 | 1.00 | 0.00 | C | C |
| ATOM | 11069 | NE2 | HSD A 321 | 46.252 | 7.952  | -68.428 | 1.00 | 0.00 | C | N |
| ATOM | 11070 | CD2 | HSD A 321 | 45.889 | 6.918  | -67.585 | 1.00 | 0.00 | C | C |
| ATOM | 11071 | C   | HSD A 321 | 46.809 | 2.454  | -66.388 | 1.00 | 0.00 | C | C |
| ATOM | 11072 | O   | HSD A 321 | 46.278 | 2.561  | -65.284 | 1.00 | 0.00 | C | O |
| ATOM | 11073 | N   | PRO A 322 | 47.346 | 1.341  | -66.802 | 1.00 | 0.00 | C | N |
| ATOM | 11074 | CD  | PRO A 322 | 47.558 | 1.086  | -68.214 | 1.00 | 0.00 | C | C |
| ATOM | 11075 | CA  | PRO A 322 | 47.235 | 0.122  | -66.044 | 1.00 | 0.00 | C | C |
| ATOM | 11076 | CB  | PRO A 322 | 47.599 | -1.011 | -67.012 | 1.00 | 0.00 | C | C |



|      |       |     |           |        |        |         |      |      |   |   |
|------|-------|-----|-----------|--------|--------|---------|------|------|---|---|
| ATOM | 11077 | CG  | PRO A 322 | 48.201 | -0.308 | -68.244 | 1.00 | 0.00 | C | C |
| ATOM | 11078 | C   | PRO A 322 | 47.972 | 0.060  | -64.745 | 1.00 | 0.00 | C | C |
| ATOM | 11079 | O   | PRO A 322 | 47.566 | -0.708 | -63.875 | 1.00 | 0.00 | C | O |
| ATOM | 11080 | N   | THR A 323 | 49.050 | 0.842  | -64.588 | 1.00 | 0.00 | C | N |
| ATOM | 11081 | CA  | THR A 323 | 49.879 | 0.753  | -63.424 | 1.00 | 0.00 | C | C |
| ATOM | 11082 | CB  | THR A 323 | 51.100 | 1.609  | -63.530 | 1.00 | 0.00 | C | C |
| ATOM | 11083 | OG1 | THR A 323 | 51.828 | 1.272  | -64.701 | 1.00 | 0.00 | C | O |
| ATOM | 11084 | CG2 | THR A 323 | 51.965 | 1.357  | -62.287 | 1.00 | 0.00 | C | C |
| ATOM | 11085 | C   | THR A 323 | 49.142 | 1.204  | -62.202 | 1.00 | 0.00 | C | C |
| ATOM | 11086 | O   | THR A 323 | 49.337 | 0.652  | -61.118 | 1.00 | 0.00 | C | O |
| ATOM | 11087 | N   | LEU A 324 | 48.273 | 2.221  | -62.347 | 1.00 | 0.00 | C | N |
| ATOM | 11088 | CA  | LEU A 324 | 47.673 | 2.863  | -61.211 | 1.00 | 0.00 | C | C |
| ATOM | 11089 | CB  | LEU A 324 | 46.899 | 4.133  | -61.595 | 1.00 | 0.00 | C | C |
| ATOM | 11090 | CG  | LEU A 324 | 47.729 | 5.140  | -62.411 | 1.00 | 0.00 | C | C |
| ATOM | 11091 | CD1 | LEU A 324 | 46.996 | 6.484  | -62.520 | 1.00 | 0.00 | C | C |
| ATOM | 11092 | CD2 | LEU A 324 | 49.166 | 5.264  | -61.886 | 1.00 | 0.00 | C | C |
| ATOM | 11093 | C   | LEU A 324 | 46.706 | 1.968  | -60.497 | 1.00 | 0.00 | C | C |
| ATOM | 11094 | O   | LEU A 324 | 45.823 | 1.366  | -61.104 | 1.00 | 0.00 | C | O |
| ATOM | 11095 | N   | LYS A 325 | 46.859 | 1.871  | -59.157 | 1.00 | 0.00 | C | N |
| ATOM | 11096 | CA  | LYS A 325 | 45.897 | 1.150  | -58.374 | 1.00 | 0.00 | C | C |
| ATOM | 11097 | CB  | LYS A 325 | 46.490 | 0.292  | -57.240 | 1.00 | 0.00 | C | C |
| ATOM | 11098 | CG  | LYS A 325 | 47.173 | -0.981 | -57.750 | 1.00 | 0.00 | C | C |
| ATOM | 11099 | CD  | LYS A 325 | 47.848 | -1.821 | -56.663 | 1.00 | 0.00 | C | C |
| ATOM | 11100 | CE  | LYS A 325 | 48.393 | -3.151 | -57.190 | 1.00 | 0.00 | C | C |
| ATOM | 11101 | NZ  | LYS A 325 | 49.021 | -3.923 | -56.095 | 1.00 | 0.00 | C | N |
| ATOM | 11102 | C   | LYS A 325 | 45.014 | 2.201  | -57.773 | 1.00 | 0.00 | C | C |
| ATOM | 11103 | O   | LYS A 325 | 45.303 | 2.761  | -56.715 | 1.00 | 0.00 | C | O |
| ATOM | 11104 | N   | LEU A 326 | 43.892 | 2.476  | -58.460 | 1.00 | 0.00 | C | N |
| ATOM | 11105 | CA  | LEU A 326 | 42.995 | 3.540  | -58.110 | 1.00 | 0.00 | C | C |
| ATOM | 11106 | CB  | LEU A 326 | 41.899 | 3.796  | -59.165 | 1.00 | 0.00 | C | C |
| ATOM | 11107 | CG  | LEU A 326 | 42.393 | 4.456  | -60.469 | 1.00 | 0.00 | C | C |
| ATOM | 11108 | CD1 | LEU A 326 | 43.344 | 3.542  | -61.256 | 1.00 | 0.00 | C | C |
| ATOM | 11109 | CD2 | LEU A 326 | 41.216 | 4.950  | -61.324 | 1.00 | 0.00 | C | C |
| ATOM | 11110 | C   | LEU A 326 | 42.298 | 3.335  | -56.798 | 1.00 | 0.00 | C | C |
| ATOM | 11111 | O   | LEU A 326 | 42.118 | 4.284  | -56.039 | 1.00 | 0.00 | C | O |
| ATOM | 11112 | N   | GLU A 327 | 41.879 | 2.098  | -56.486 | 1.00 | 0.00 | C | N |
| ATOM | 11113 | CA  | GLU A 327 | 41.078 | 1.860  | -55.313 | 1.00 | 0.00 | C | C |
| ATOM | 11114 | CB  | GLU A 327 | 40.480 | 0.446  | -55.268 | 1.00 | 0.00 | C | C |

|      |       |     |           |        |        |         |      |      |   |   |
|------|-------|-----|-----------|--------|--------|---------|------|------|---|---|
| ATOM | 11115 | CG  | GLU A 327 | 39.353 | 0.284  | -56.289 | 1.00 | 0.00 | C | C |
| ATOM | 11116 | CD  | GLU A 327 | 38.766 | -1.112 | -56.162 | 1.00 | 0.00 | C | C |
| ATOM | 11117 | OE1 | GLU A 327 | 39.465 | -2.085 | -56.556 | 1.00 | 0.00 | C | O |
| ATOM | 11118 | OE2 | GLU A 327 | 37.612 | -1.226 | -55.672 | 1.00 | 0.00 | C | O |
| ATOM | 11119 | C   | GLU A 327 | 41.832 | 2.125  | -54.049 | 1.00 | 0.00 | C | C |
| ATOM | 11120 | O   | GLU A 327 | 41.235 | 2.338  | -52.994 | 1.00 | 0.00 | C | O |
| ATOM | 11121 | N   | GLU A 328 | 43.166 | 2.029  | -54.103 | 1.00 | 0.00 | C | N |
| ATOM | 11122 | CA  | GLU A 328 | 44.031 | 2.218  | -52.974 | 1.00 | 0.00 | C | C |
| ATOM | 11123 | CB  | GLU A 328 | 45.432 | 1.652  | -53.244 | 1.00 | 0.00 | C | C |
| ATOM | 11124 | CG  | GLU A 328 | 45.378 | 0.123  | -53.330 | 1.00 | 0.00 | C | C |
| ATOM | 11125 | CD  | GLU A 328 | 46.744 | -0.417 | -53.721 | 1.00 | 0.00 | C | C |
| ATOM | 11126 | OE1 | GLU A 328 | 47.533 | 0.343  | -54.342 | 1.00 | 0.00 | C | O |
| ATOM | 11127 | OE2 | GLU A 328 | 47.010 | -1.607 | -53.411 | 1.00 | 0.00 | C | O |
| ATOM | 11128 | C   | GLU A 328 | 44.145 | 3.655  | -52.518 | 1.00 | 0.00 | C | C |
| ATOM | 11129 | O   | GLU A 328 | 44.443 | 3.888  | -51.348 | 1.00 | 0.00 | C | O |
| ATOM | 11130 | N   | LEU A 329 | 43.947 | 4.659  | -53.404 | 1.00 | 0.00 | C | N |
| ATOM | 11131 | CA  | LEU A 329 | 44.191 | 6.048  | -53.066 | 1.00 | 0.00 | C | C |
| ATOM | 11132 | CB  | LEU A 329 | 44.015 | 7.008  | -54.257 | 1.00 | 0.00 | C | C |
| ATOM | 11133 | CG  | LEU A 329 | 45.028 | 6.786  | -55.397 | 1.00 | 0.00 | C | C |
| ATOM | 11134 | CD1 | LEU A 329 | 44.855 | 5.400  | -56.037 | 1.00 | 0.00 | C | C |
| ATOM | 11135 | CD2 | LEU A 329 | 44.967 | 7.928  | -56.426 | 1.00 | 0.00 | C | C |
| ATOM | 11136 | C   | LEU A 329 | 43.297 | 6.548  | -51.960 | 1.00 | 0.00 | C | C |
| ATOM | 11137 | O   | LEU A 329 | 42.071 | 6.460  | -52.032 | 1.00 | 0.00 | C | O |
| ATOM | 11138 | N   | THR A 330 | 43.926 | 7.154  | -50.921 | 1.00 | 0.00 | C | N |
| ATOM | 11139 | CA  | THR A 330 | 43.246 | 7.626  | -49.741 | 1.00 | 0.00 | C | C |
| ATOM | 11140 | CB  | THR A 330 | 44.064 | 7.455  | -48.496 | 1.00 | 0.00 | C | C |
| ATOM | 11141 | OG1 | THR A 330 | 45.233 | 8.258  | -48.572 | 1.00 | 0.00 | C | O |
| ATOM | 11142 | CG2 | THR A 330 | 44.450 | 5.973  | -48.361 | 1.00 | 0.00 | C | C |
| ATOM | 11143 | C   | THR A 330 | 42.943 | 9.093  | -49.834 | 1.00 | 0.00 | C | C |
| ATOM | 11144 | O   | THR A 330 | 43.725 | 9.877  | -50.367 | 1.00 | 0.00 | C | O |
| ATOM | 11145 | N   | ASN A 331 | 41.779 | 9.497  | -49.272 | 1.00 | 0.00 | C | N |
| ATOM | 11146 | CA  | ASN A 331 | 41.386 | 10.877 | -49.223 | 1.00 | 0.00 | C | C |
| ATOM | 11147 | CB  | ASN A 331 | 39.860 | 11.099 | -49.106 | 1.00 | 0.00 | C | C |
| ATOM | 11148 | CG  | ASN A 331 | 39.334 | 10.501 | -47.807 | 1.00 | 0.00 | C | C |
| ATOM | 11149 | OD1 | ASN A 331 | 40.076 | 9.938  | -47.005 | 1.00 | 0.00 | C | O |
| ATOM | 11150 | ND2 | ASN A 331 | 37.995 | 10.616 | -47.600 | 1.00 | 0.00 | C | N |
| ATOM | 11151 | C   | ASN A 331 | 42.083 | 11.491 | -48.044 | 1.00 | 0.00 | C | C |
| ATOM | 11152 | O   | ASN A 331 | 42.893 | 10.842 | -47.385 | 1.00 | 0.00 | C | O |

|      |       |     |           |        |        |         |      |      |   |   |
|------|-------|-----|-----------|--------|--------|---------|------|------|---|---|
| ATOM | 11153 | N   | LYS A 332 | 41.773 | 12.763 | -47.733 | 1.00 | 0.00 | C | N |
| ATOM | 11154 | CA  | LYS A 332 | 42.450 | 13.506 | -46.702 | 1.00 | 0.00 | C | C |
| ATOM | 11155 | CB  | LYS A 332 | 41.717 | 14.821 | -46.401 | 1.00 | 0.00 | C | C |
| ATOM | 11156 | CG  | LYS A 332 | 42.373 | 15.740 | -45.373 | 1.00 | 0.00 | C | C |
| ATOM | 11157 | CD  | LYS A 332 | 41.559 | 17.022 | -45.152 | 1.00 | 0.00 | C | C |
| ATOM | 11158 | CE  | LYS A 332 | 40.967 | 17.608 | -46.438 | 1.00 | 0.00 | C | C |
| ATOM | 11159 | NZ  | LYS A 332 | 39.912 | 18.595 | -46.109 | 1.00 | 0.00 | C | N |
| ATOM | 11160 | C   | LYS A 332 | 42.401 | 12.727 | -45.423 | 1.00 | 0.00 | C | C |
| ATOM | 11161 | O   | LYS A 332 | 43.402 | 12.602 | -44.719 | 1.00 | 0.00 | C | O |
| ATOM | 11162 | N   | LYS A 333 | 41.228 | 12.164 | -45.103 | 1.00 | 0.00 | C | N |
| ATOM | 11163 | CA  | LYS A 333 | 40.987 | 11.462 | -43.876 | 1.00 | 0.00 | C | C |
| ATOM | 11164 | CB  | LYS A 333 | 39.510 | 11.078 | -43.689 | 1.00 | 0.00 | C | C |
| ATOM | 11165 | CG  | LYS A 333 | 38.609 | 12.304 | -43.529 | 1.00 | 0.00 | C | C |
| ATOM | 11166 | CD  | LYS A 333 | 37.116 | 11.997 | -43.643 | 1.00 | 0.00 | C | C |
| ATOM | 11167 | CE  | LYS A 333 | 36.242 | 13.252 | -43.610 | 1.00 | 0.00 | C | C |
| ATOM | 11168 | NZ  | LYS A 333 | 36.552 | 14.045 | -42.401 | 1.00 | 0.00 | C | N |
| ATOM | 11169 | C   | LYS A 333 | 41.818 | 10.212 | -43.813 | 1.00 | 0.00 | C | C |
| ATOM | 11170 | O   | LYS A 333 | 42.030 | 9.664  | -42.734 | 1.00 | 0.00 | C | O |
| ATOM | 11171 | N   | GLY A 334 | 42.291 | 9.697  | -44.963 | 1.00 | 0.00 | C | N |
| ATOM | 11172 | CA  | GLY A 334 | 43.055 | 8.482  | -44.918 | 1.00 | 0.00 | C | C |
| ATOM | 11173 | C   | GLY A 334 | 42.160 | 7.362  | -45.331 | 1.00 | 0.00 | C | C |
| ATOM | 11174 | O   | GLY A 334 | 42.455 | 6.194  | -45.080 | 1.00 | 0.00 | C | O |
| ATOM | 11175 | N   | MET A 335 | 41.034 | 7.694  | -45.996 | 1.00 | 0.00 | C | N |
| ATOM | 11176 | CA  | MET A 335 | 40.100 | 6.669  | -46.355 | 1.00 | 0.00 | C | C |
| ATOM | 11177 | CB  | MET A 335 | 38.644 | 7.063  | -46.053 | 1.00 | 0.00 | C | C |
| ATOM | 11178 | CG  | MET A 335 | 38.378 | 7.316  | -44.568 | 1.00 | 0.00 | C | C |
| ATOM | 11179 | SD  | MET A 335 | 36.672 | 7.803  | -44.170 | 1.00 | 0.00 | C | S |
| ATOM | 11180 | CE  | MET A 335 | 37.046 | 8.326  | -42.472 | 1.00 | 0.00 | C | C |
| ATOM | 11181 | C   | MET A 335 | 40.164 | 6.360  | -47.821 | 1.00 | 0.00 | C | C |
| ATOM | 11182 | O   | MET A 335 | 40.212 | 7.247  | -48.674 | 1.00 | 0.00 | C | O |
| ATOM | 11183 | N   | THR A 336 | 40.171 | 5.048  | -48.136 | 1.00 | 0.00 | C | N |
| ATOM | 11184 | CA  | THR A 336 | 40.080 | 4.594  | -49.492 | 1.00 | 0.00 | C | C |
| ATOM | 11185 | CB  | THR A 336 | 40.448 | 3.152  | -49.682 | 1.00 | 0.00 | C | C |
| ATOM | 11186 | OG1 | THR A 336 | 39.560 | 2.317  | -48.954 | 1.00 | 0.00 | C | O |
| ATOM | 11187 | CG2 | THR A 336 | 41.896 | 2.941  | -49.206 | 1.00 | 0.00 | C | C |
| ATOM | 11188 | C   | THR A 336 | 38.628 | 4.737  | -49.823 | 1.00 | 0.00 | C | C |
| ATOM | 11189 | O   | THR A 336 | 37.815 | 4.934  | -48.921 | 1.00 | 0.00 | C | O |
| ATOM | 11190 | N   | PRO A 337 | 38.252 | 4.651  | -51.072 | 1.00 | 0.00 | C | N |

|            |               |        |        |         |      |      |   |   |
|------------|---------------|--------|--------|---------|------|------|---|---|
| ATOM 11191 | CD PRO A 337  | 39.170 | 4.769  | -52.191 | 1.00 | 0.00 | C | C |
| ATOM 11192 | CA PRO A 337  | 36.878 | 4.819  | -51.452 | 1.00 | 0.00 | C | C |
| ATOM 11193 | CB PRO A 337  | 36.860 | 4.672  | -52.972 | 1.00 | 0.00 | C | C |
| ATOM 11194 | CG PRO A 337  | 38.275 | 5.115  | -53.397 | 1.00 | 0.00 | C | C |
| ATOM 11195 | C PRO A 337   | 36.012 | 3.848  | -50.712 | 1.00 | 0.00 | C | C |
| ATOM 11196 | O PRO A 337   | 34.965 | 4.248  | -50.211 | 1.00 | 0.00 | C | O |
| ATOM 11197 | N LEU A 338   | 36.452 | 2.585  | -50.585 | 1.00 | 0.00 | C | N |
| ATOM 11198 | CA LEU A 338  | 35.681 | 1.584  | -49.911 | 1.00 | 0.00 | C | C |
| ATOM 11199 | CB LEU A 338  | 36.424 | 0.239  | -49.869 | 1.00 | 0.00 | C | C |
| ATOM 11200 | CG LEU A 338  | 35.664 | -0.884 | -49.145 | 1.00 | 0.00 | C | C |
| ATOM 11201 | CD1 LEU A 338 | 34.414 | -1.317 | -49.927 | 1.00 | 0.00 | C | C |
| ATOM 11202 | CD2 LEU A 338 | 36.604 | -2.051 | -48.812 | 1.00 | 0.00 | C | C |
| ATOM 11203 | C LEU A 338   | 35.474 | 2.006  | -48.492 | 1.00 | 0.00 | C | C |
| ATOM 11204 | O LEU A 338   | 34.360 | 1.968  | -47.976 | 1.00 | 0.00 | C | O |
| ATOM 11205 | N ALA A 339   | 36.553 | 2.463  | -47.829 | 1.00 | 0.00 | C | N |
| ATOM 11206 | CA ALA A 339  | 36.505 | 2.796  | -46.435 | 1.00 | 0.00 | C | C |
| ATOM 11207 | CB ALA A 339  | 37.871 | 3.244  | -45.889 | 1.00 | 0.00 | C | C |
| ATOM 11208 | C ALA A 339   | 35.543 | 3.919  | -46.214 | 1.00 | 0.00 | C | C |
| ATOM 11209 | O ALA A 339   | 34.837 | 3.947  | -45.207 | 1.00 | 0.00 | C | O |
| ATOM 11210 | N LEU A 340   | 35.522 | 4.893  | -47.140 | 1.00 | 0.00 | C | N |
| ATOM 11211 | CA LEU A 340  | 34.656 | 6.034  | -47.031 | 1.00 | 0.00 | C | C |
| ATOM 11212 | CB LEU A 340  | 34.891 | 7.019  | -48.195 | 1.00 | 0.00 | C | C |
| ATOM 11213 | CG LEU A 340  | 34.279 | 8.431  | -48.048 | 1.00 | 0.00 | C | C |
| ATOM 11214 | CD1 LEU A 340 | 34.451 | 9.227  | -49.350 | 1.00 | 0.00 | C | C |
| ATOM 11215 | CD2 LEU A 340 | 32.829 | 8.425  | -47.552 | 1.00 | 0.00 | C | C |
| ATOM 11216 | C LEU A 340   | 33.240 | 5.546  | -47.107 | 1.00 | 0.00 | C | C |
| ATOM 11217 | O LEU A 340   | 32.397 | 5.918  | -46.292 | 1.00 | 0.00 | C | O |
| ATOM 11218 | N ALA A 341   | 32.958 | 4.636  | -48.062 | 1.00 | 0.00 | C | N |
| ATOM 11219 | CA ALA A 341  | 31.610 | 4.189  | -48.270 | 1.00 | 0.00 | C | C |
| ATOM 11220 | CB ALA A 341  | 31.511 | 3.100  | -49.353 | 1.00 | 0.00 | C | C |
| ATOM 11221 | C ALA A 341   | 31.099 | 3.603  | -46.990 | 1.00 | 0.00 | C | C |
| ATOM 11222 | O ALA A 341   | 29.955 | 3.848  | -46.612 | 1.00 | 0.00 | C | O |
| ATOM 11223 | N ALA A 342   | 31.939 | 2.805  | -46.306 | 1.00 | 0.00 | C | N |
| ATOM 11224 | CA ALA A 342  | 31.594 | 2.157  | -45.069 | 1.00 | 0.00 | C | C |
| ATOM 11225 | CB ALA A 342  | 32.649 | 1.137  | -44.627 | 1.00 | 0.00 | C | C |
| ATOM 11226 | C ALA A 342   | 31.420 | 3.155  | -43.963 | 1.00 | 0.00 | C | C |
| ATOM 11227 | O ALA A 342   | 30.569 | 2.982  | -43.092 | 1.00 | 0.00 | C | O |
| ATOM 11228 | N GLY A 343   | 32.259 | 4.206  | -43.931 | 1.00 | 0.00 | C | N |

|      |       |     |           |        |        |         |      |      |   |   |
|------|-------|-----|-----------|--------|--------|---------|------|------|---|---|
| ATOM | 11229 | CA  | GLY A 343 | 32.135 | 5.183  | -42.888 | 1.00 | 0.00 | C | C |
| ATOM | 11230 | C   | GLY A 343 | 30.803 | 5.877  | -43.004 | 1.00 | 0.00 | C | C |
| ATOM | 11231 | O   | GLY A 343 | 30.171 | 6.205  | -42.000 | 1.00 | 0.00 | C | O |
| ATOM | 11232 | N   | THR A 344 | 30.390 | 6.173  | -44.250 | 1.00 | 0.00 | C | N |
| ATOM | 11233 | CA  | THR A 344 | 29.205 | 6.904  | -44.638 | 1.00 | 0.00 | C | C |
| ATOM | 11234 | CB  | THR A 344 | 29.400 | 7.597  | -45.964 | 1.00 | 0.00 | C | C |
| ATOM | 11235 | OG1 | THR A 344 | 30.581 | 8.383  | -45.909 | 1.00 | 0.00 | C | O |
| ATOM | 11236 | CG2 | THR A 344 | 28.223 | 8.550  | -46.230 | 1.00 | 0.00 | C | C |
| ATOM | 11237 | C   | THR A 344 | 27.937 | 6.083  | -44.666 | 1.00 | 0.00 | C | C |
| ATOM | 11238 | O   | THR A 344 | 26.857 | 6.638  | -44.852 | 1.00 | 0.00 | C | O |
| ATOM | 11239 | N   | GLY A 345 | 28.004 | 4.736  | -44.614 | 1.00 | 0.00 | C | N |
| ATOM | 11240 | CA  | GLY A 345 | 26.775 | 3.986  | -44.630 | 1.00 | 0.00 | C | C |
| ATOM | 11241 | C   | GLY A 345 | 26.226 | 3.916  | -46.027 | 1.00 | 0.00 | C | C |
| ATOM | 11242 | O   | GLY A 345 | 25.010 | 3.874  | -46.216 | 1.00 | 0.00 | C | O |
| ATOM | 11243 | N   | LYS A 346 | 27.101 | 3.940  | -47.052 | 1.00 | 0.00 | C | N |
| ATOM | 11244 | CA  | LYS A 346 | 26.609 | 3.779  | -48.398 | 1.00 | 0.00 | C | C |
| ATOM | 11245 | CB  | LYS A 346 | 27.342 | 4.642  | -49.442 | 1.00 | 0.00 | C | C |
| ATOM | 11246 | CG  | LYS A 346 | 26.769 | 6.058  | -49.551 | 1.00 | 0.00 | C | C |
| ATOM | 11247 | CD  | LYS A 346 | 26.908 | 6.906  | -48.290 | 1.00 | 0.00 | C | C |
| ATOM | 11248 | CE  | LYS A 346 | 26.243 | 8.281  | -48.398 | 1.00 | 0.00 | C | C |
| ATOM | 11249 | NZ  | LYS A 346 | 26.973 | 9.129  | -49.367 | 1.00 | 0.00 | C | N |
| ATOM | 11250 | C   | LYS A 346 | 26.792 | 2.333  | -48.741 | 1.00 | 0.00 | C | C |
| ATOM | 11251 | O   | LYS A 346 | 27.731 | 1.953  | -49.435 | 1.00 | 0.00 | C | O |
| ATOM | 11252 | N   | ILE A 347 | 25.825 | 1.513  | -48.281 | 1.00 | 0.00 | C | N |
| ATOM | 11253 | CA  | ILE A 347 | 25.878 | 0.076  | -48.300 | 1.00 | 0.00 | C | C |
| ATOM | 11254 | CB  | ILE A 347 | 24.722 | -0.576 | -47.596 | 1.00 | 0.00 | C | C |
| ATOM | 11255 | CG2 | ILE A 347 | 24.866 | -2.095 | -47.804 | 1.00 | 0.00 | C | C |
| ATOM | 11256 | CG1 | ILE A 347 | 24.654 | -0.179 | -46.113 | 1.00 | 0.00 | C | C |
| ATOM | 11257 | CD  | ILE A 347 | 24.217 | 1.265  | -45.874 | 1.00 | 0.00 | C | C |
| ATOM | 11258 | C   | ILE A 347 | 25.869 | -0.523 | -49.669 | 1.00 | 0.00 | C | C |
| ATOM | 11259 | O   | ILE A 347 | 26.662 | -1.417 | -49.957 | 1.00 | 0.00 | C | O |
| ATOM | 11260 | N   | GLY A 348 | 24.974 | -0.057 | -50.555 | 1.00 | 0.00 | C | N |
| ATOM | 11261 | CA  | GLY A 348 | 24.832 | -0.708 | -51.825 | 1.00 | 0.00 | C | C |
| ATOM | 11262 | C   | GLY A 348 | 26.140 | -0.667 | -52.543 | 1.00 | 0.00 | C | C |
| ATOM | 11263 | O   | GLY A 348 | 26.529 | -1.631 | -53.200 | 1.00 | 0.00 | C | O |
| ATOM | 11264 | N   | VAL A 349 | 26.833 | 0.481  | -52.462 | 1.00 | 0.00 | C | N |
| ATOM | 11265 | CA  | VAL A 349 | 28.093 | 0.683  | -53.118 | 1.00 | 0.00 | C | C |
| ATOM | 11266 | CB  | VAL A 349 | 28.538 | 2.119  | -53.063 | 1.00 | 0.00 | C | C |

|      |       |               |        |        |         |      |      |   |   |
|------|-------|---------------|--------|--------|---------|------|------|---|---|
| ATOM | 11267 | CG1 VAL A 349 | 29.894 | 2.246  | -53.778 | 1.00 | 0.00 | C | C |
| ATOM | 11268 | CG2 VAL A 349 | 27.433 | 2.995  | -53.676 | 1.00 | 0.00 | C | C |
| ATOM | 11269 | C VAL A 349   | 29.147 | -0.159 | -52.469 | 1.00 | 0.00 | C | C |
| ATOM | 11270 | O VAL A 349   | 29.958 | -0.785 | -53.148 | 1.00 | 0.00 | C | O |
| ATOM | 11271 | N LEU A 350   | 29.140 | -0.210 | -51.123 | 1.00 | 0.00 | C | N |
| ATOM | 11272 | CA LEU A 350  | 30.138 | -0.949 | -50.404 | 1.00 | 0.00 | C | C |
| ATOM | 11273 | CB LEU A 350  | 29.881 | -0.887 | -48.884 | 1.00 | 0.00 | C | C |
| ATOM | 11274 | CG LEU A 350  | 30.973 | -1.470 | -47.958 | 1.00 | 0.00 | C | C |
| ATOM | 11275 | CD1 LEU A 350 | 30.549 | -1.318 | -46.489 | 1.00 | 0.00 | C | C |
| ATOM | 11276 | CD2 LEU A 350 | 31.351 | -2.922 | -48.292 | 1.00 | 0.00 | C | C |
| ATOM | 11277 | C LEU A 350   | 30.049 | -2.375 | -50.864 | 1.00 | 0.00 | C | C |
| ATOM | 11278 | O LEU A 350   | 31.060 | -3.004 | -51.178 | 1.00 | 0.00 | C | O |
| ATOM | 11279 | N ALA A 351   | 28.818 | -2.916 | -50.951 | 1.00 | 0.00 | C | N |
| ATOM | 11280 | CA ALA A 351  | 28.633 | -4.276 | -51.368 | 1.00 | 0.00 | C | C |
| ATOM | 11281 | CB ALA A 351  | 27.150 | -4.682 | -51.397 | 1.00 | 0.00 | C | C |
| ATOM | 11282 | C ALA A 351   | 29.162 | -4.412 | -52.762 | 1.00 | 0.00 | C | C |
| ATOM | 11283 | O ALA A 351   | 29.795 | -5.407 | -53.106 | 1.00 | 0.00 | C | O |
| ATOM | 11284 | N TYR A 352   | 28.906 | -3.394 | -53.595 | 1.00 | 0.00 | C | N |
| ATOM | 11285 | CA TYR A 352  | 29.309 | -3.377 | -54.970 | 1.00 | 0.00 | C | C |
| ATOM | 11286 | CB TYR A 352  | 28.777 | -2.115 | -55.661 | 1.00 | 0.00 | C | C |
| ATOM | 11287 | CG TYR A 352  | 29.583 | -1.842 | -56.878 | 1.00 | 0.00 | C | C |
| ATOM | 11288 | CD1 TYR A 352 | 29.497 | -2.637 | -57.995 | 1.00 | 0.00 | C | C |
| ATOM | 11289 | CE1 TYR A 352 | 30.249 | -2.340 | -59.109 | 1.00 | 0.00 | C | C |
| ATOM | 11290 | CZ TYR A 352  | 31.086 | -1.250 | -59.112 | 1.00 | 0.00 | C | C |
| ATOM | 11291 | OH TYR A 352  | 31.856 | -0.944 | -60.254 | 1.00 | 0.00 | C | O |
| ATOM | 11292 | CD2 TYR A 352 | 30.424 | -0.757 | -56.885 | 1.00 | 0.00 | C | C |
| ATOM | 11293 | CE2 TYR A 352 | 31.177 | -0.457 | -57.994 | 1.00 | 0.00 | C | C |
| ATOM | 11294 | C TYR A 352   | 30.800 | -3.420 | -55.102 | 1.00 | 0.00 | C | C |
| ATOM | 11295 | O TYR A 352   | 31.321 | -4.174 | -55.918 | 1.00 | 0.00 | C | O |
| ATOM | 11296 | N ILE A 353   | 31.539 | -2.618 | -54.316 | 1.00 | 0.00 | C | N |
| ATOM | 11297 | CA ILE A 353  | 32.965 | -2.578 | -54.481 | 1.00 | 0.00 | C | C |
| ATOM | 11298 | CB ILE A 353  | 33.631 | -1.467 | -53.719 | 1.00 | 0.00 | C | C |
| ATOM | 11299 | CG2 ILE A 353 | 35.153 | -1.689 | -53.777 | 1.00 | 0.00 | C | C |
| ATOM | 11300 | CG1 ILE A 353 | 33.191 | -0.105 | -54.284 | 1.00 | 0.00 | C | C |
| ATOM | 11301 | CD ILE A 353  | 33.654 | 1.086  | -53.443 | 1.00 | 0.00 | C | C |
| ATOM | 11302 | C ILE A 353   | 33.601 | -3.875 | -54.098 | 1.00 | 0.00 | C | C |
| ATOM | 11303 | O ILE A 353   | 34.526 | -4.324 | -54.766 | 1.00 | 0.00 | C | O |
| ATOM | 11304 | N LEU A 354   | 33.170 | -4.472 | -52.971 | 1.00 | 0.00 | C | N |

|      |       |     |           |        |         |         |      |      |   |   |
|------|-------|-----|-----------|--------|---------|---------|------|------|---|---|
| ATOM | 11305 | CA  | LEU A 354 | 33.716 | -5.708  | -52.476 | 1.00 | 0.00 | C | C |
| ATOM | 11306 | CB  | LEU A 354 | 33.231 | -6.009  | -51.054 | 1.00 | 0.00 | C | C |
| ATOM | 11307 | CG  | LEU A 354 | 33.647 | -4.946  | -50.023 | 1.00 | 0.00 | C | C |
| ATOM | 11308 | CD1 | LEU A 354 | 33.089 | -5.289  | -48.635 | 1.00 | 0.00 | C | C |
| ATOM | 11309 | CD2 | LEU A 354 | 35.168 | -4.727  | -50.010 | 1.00 | 0.00 | C | C |
| ATOM | 11310 | C   | LEU A 354 | 33.293 | -6.874  | -53.322 | 1.00 | 0.00 | C | C |
| ATOM | 11311 | O   | LEU A 354 | 34.016 | -7.841  | -53.493 | 1.00 | 0.00 | C | O |
| ATOM | 11312 | N   | GLN A 355 | 32.027 | -6.891  | -53.741 | 1.00 | 0.00 | C | N |
| ATOM | 11313 | CA  | GLN A 355 | 31.409 | -7.936  | -54.505 | 1.00 | 0.00 | C | C |
| ATOM | 11314 | CB  | GLN A 355 | 29.936 | -8.140  | -54.122 | 1.00 | 0.00 | C | C |
| ATOM | 11315 | CG  | GLN A 355 | 29.772 | -8.922  | -52.808 | 1.00 | 0.00 | C | C |
| ATOM | 11316 | CD  | GLN A 355 | 30.675 | -8.325  | -51.735 | 1.00 | 0.00 | C | C |
| ATOM | 11317 | OE1 | GLN A 355 | 30.272 | -7.455  | -50.967 | 1.00 | 0.00 | C | O |
| ATOM | 11318 | NE2 | GLN A 355 | 31.952 | -8.799  | -51.688 | 1.00 | 0.00 | C | N |
| ATOM | 11319 | C   | GLN A 355 | 31.543 | -7.793  | -55.986 | 1.00 | 0.00 | C | C |
| ATOM | 11320 | O   | GLN A 355 | 31.125 | -8.700  | -56.696 | 1.00 | 0.00 | C | O |
| ATOM | 11321 | N   | ARG A 356 | 31.987 | -6.626  | -56.499 | 1.00 | 0.00 | C | N |
| ATOM | 11322 | CA  | ARG A 356 | 31.969 | -6.355  | -57.915 | 1.00 | 0.00 | C | C |
| ATOM | 11323 | CB  | ARG A 356 | 32.447 | -4.944  | -58.290 | 1.00 | 0.00 | C | C |
| ATOM | 11324 | CG  | ARG A 356 | 32.422 | -4.701  | -59.799 | 1.00 | 0.00 | C | C |
| ATOM | 11325 | CD  | ARG A 356 | 33.356 | -3.584  | -60.269 | 1.00 | 0.00 | C | C |
| ATOM | 11326 | NE  | ARG A 356 | 34.752 | -4.046  | -60.025 | 1.00 | 0.00 | C | N |
| ATOM | 11327 | CZ  | ARG A 356 | 35.516 | -3.443  | -59.067 | 1.00 | 0.00 | C | C |
| ATOM | 11328 | NH1 | ARG A 356 | 35.030 | -2.361  | -58.392 | 1.00 | 0.00 | C | N |
| ATOM | 11329 | NH2 | ARG A 356 | 36.763 | -3.920  | -58.789 | 1.00 | 0.00 | C | N |
| ATOM | 11330 | C   | ARG A 356 | 32.907 | -7.255  | -58.648 | 1.00 | 0.00 | C | C |
| ATOM | 11331 | O   | ARG A 356 | 33.988 | -6.832  | -59.056 | 1.00 | 0.00 | C | O |
| ATOM | 11332 | N   | GLU A 357 | 32.463 | -8.497  | -58.906 | 1.00 | 0.00 | C | N |
| ATOM | 11333 | CA  | GLU A 357 | 33.243 | -9.476  | -59.600 | 1.00 | 0.00 | C | C |
| ATOM | 11334 | CB  | GLU A 357 | 32.581 | -10.859 | -59.609 | 1.00 | 0.00 | C | C |
| ATOM | 11335 | CG  | GLU A 357 | 31.233 | -10.797 | -60.339 | 1.00 | 0.00 | C | C |
| ATOM | 11336 | CD  | GLU A 357 | 30.671 | -12.198 | -60.511 | 1.00 | 0.00 | C | C |
| ATOM | 11337 | OE1 | GLU A 357 | 30.557 | -12.925 | -59.490 | 1.00 | 0.00 | C | O |
| ATOM | 11338 | OE2 | GLU A 357 | 30.345 | -12.558 | -61.675 | 1.00 | 0.00 | C | O |
| ATOM | 11339 | C   | GLU A 357 | 33.258 | -9.055  | -61.032 | 1.00 | 0.00 | C | C |
| ATOM | 11340 | O   | GLU A 357 | 32.272 | -8.513  | -61.530 | 1.00 | 0.00 | C | O |
| ATOM | 11341 | N   | ILE A 358 | 34.380 | -9.275  | -61.747 | 1.00 | 0.00 | C | N |
| ATOM | 11342 | CA  | ILE A 358 | 34.347 | -8.880  | -63.121 | 1.00 | 0.00 | C | C |

|            |               |        |         |         |      |      |   |   |
|------------|---------------|--------|---------|---------|------|------|---|---|
| ATOM 11343 | CB ILE A 358  | 35.043 | -7.567  | -63.350 | 1.00 | 0.00 | C | C |
| ATOM 11344 | CG2 ILE A 358 | 36.555 | -7.798  | -63.190 | 1.00 | 0.00 | C | C |
| ATOM 11345 | CG1 ILE A 358 | 34.602 | -6.931  | -64.682 | 1.00 | 0.00 | C | C |
| ATOM 11346 | CD ILE A 358  | 33.137 | -6.496  | -64.712 | 1.00 | 0.00 | C | C |
| ATOM 11347 | C ILE A 358   | 34.978 | -9.974  | -63.935 | 1.00 | 0.00 | C | C |
| ATOM 11348 | O ILE A 358   | 35.942 | -10.603 | -63.499 | 1.00 | 0.00 | C | O |
| ATOM 11349 | N GLN A 359   | 34.421 | -10.267 | -65.132 | 1.00 | 0.00 | C | N |
| ATOM 11350 | CA GLN A 359  | 34.992 | -11.307 | -65.945 | 1.00 | 0.00 | C | C |
| ATOM 11351 | CB GLN A 359  | 34.117 | -12.569 | -66.047 | 1.00 | 0.00 | C | C |
| ATOM 11352 | CG GLN A 359  | 34.740 | -13.670 | -66.908 | 1.00 | 0.00 | C | C |
| ATOM 11353 | CD GLN A 359  | 35.912 | -14.281 | -66.145 | 1.00 | 0.00 | C | C |
| ATOM 11354 | OE1 GLN A 359 | 36.419 | -13.699 | -65.186 | 1.00 | 0.00 | C | O |
| ATOM 11355 | NE2 GLN A 359 | 36.359 | -15.487 | -66.585 | 1.00 | 0.00 | C | N |
| ATOM 11356 | C GLN A 359   | 35.181 | -10.767 | -67.330 | 1.00 | 0.00 | C | C |
| ATOM 11357 | O GLN A 359   | 34.237 | -10.295 | -67.966 | 1.00 | 0.00 | C | O |
| ATOM 11358 | N GLU A 360   | 36.438 | -10.835 | -67.820 | 1.00 | 0.00 | C | N |
| ATOM 11359 | CA GLU A 360  | 36.832 | -10.306 | -69.097 | 1.00 | 0.00 | C | C |
| ATOM 11360 | CB GLU A 360  | 36.494 | -8.797  | -69.207 | 1.00 | 0.00 | C | C |
| ATOM 11361 | CG GLU A 360  | 36.803 | -8.075  | -70.520 | 1.00 | 0.00 | C | C |
| ATOM 11362 | CD GLU A 360  | 38.137 | -7.371  | -70.333 | 1.00 | 0.00 | C | C |
| ATOM 11363 | OE1 GLU A 360 | 38.378 | -6.858  | -69.207 | 1.00 | 0.00 | C | O |
| ATOM 11364 | OE2 GLU A 360 | 38.934 | -7.335  | -71.308 | 1.00 | 0.00 | C | O |
| ATOM 11365 | C GLU A 360   | 38.319 | -10.531 | -69.149 | 1.00 | 0.00 | C | C |
| ATOM 11366 | O GLU A 360   | 38.890 | -11.004 | -68.165 | 1.00 | 0.00 | C | O |
| ATOM 11367 | N PRO A 361   | 38.991 | -10.220 | -70.227 | 1.00 | 0.00 | C | N |
| ATOM 11368 | CD PRO A 361  | 38.405 | -10.407 | -71.547 | 1.00 | 0.00 | C | C |
| ATOM 11369 | CA PRO A 361  | 40.399 | -10.493 | -70.262 | 1.00 | 0.00 | C | C |
| ATOM 11370 | CB PRO A 361  | 40.833 | -10.242 | -71.702 | 1.00 | 0.00 | C | C |
| ATOM 11371 | CG PRO A 361  | 39.586 | -10.660 | -72.503 | 1.00 | 0.00 | C | C |
| ATOM 11372 | C PRO A 361   | 41.248 | -9.848  | -69.217 | 1.00 | 0.00 | C | C |
| ATOM 11373 | O PRO A 361   | 42.323 | -10.353 | -68.941 | 1.00 | 0.00 | C | O |
| ATOM 11374 | N GLU A 362   | 40.919 | -8.716  | -68.613 | 1.00 | 0.00 | C | N |
| ATOM 11375 | CA GLU A 362  | 41.888 | -8.481  | -67.585 | 1.00 | 0.00 | C | C |
| ATOM 11376 | CB GLU A 362  | 42.611 | -7.134  | -67.737 | 1.00 | 0.00 | C | C |
| ATOM 11377 | CG GLU A 362  | 43.397 | -7.016  | -69.044 | 1.00 | 0.00 | C | C |
| ATOM 11378 | CD GLU A 362  | 42.411 | -6.629  | -70.140 | 1.00 | 0.00 | C | C |
| ATOM 11379 | OE1 GLU A 362 | 41.782 | -5.546  | -70.011 | 1.00 | 0.00 | C | O |
| ATOM 11380 | OE2 GLU A 362 | 42.269 | -7.413  | -71.118 | 1.00 | 0.00 | C | O |



|      |       |     |           |        |         |         |      |      |   |   |
|------|-------|-----|-----------|--------|---------|---------|------|------|---|---|
| ATOM | 11381 | C   | GLU A 362 | 41.091 | -8.402  | -66.340 | 1.00 | 0.00 | C | C |
| ATOM | 11382 | O   | GLU A 362 | 41.360 | -7.592  | -65.457 | 1.00 | 0.00 | C | O |
| ATOM | 11383 | N   | CYS A 363 | 40.063 | -9.249  | -66.238 | 1.00 | 0.00 | C | N |
| ATOM | 11384 | CA  | CYS A 363 | 39.167 | -9.144  | -65.128 | 1.00 | 0.00 | C | C |
| ATOM | 11385 | CB  | CYS A 363 | 37.778 | -9.715  | -65.391 | 1.00 | 0.00 | C | C |
| ATOM | 11386 | SG  | CYS A 363 | 36.800 | -8.423  | -66.188 | 1.00 | 0.00 | C | S |
| ATOM | 11387 | C   | CYS A 363 | 39.650 | -9.643  | -63.803 | 1.00 | 0.00 | C | C |
| ATOM | 11388 | O   | CYS A 363 | 39.310 | -9.056  | -62.779 | 1.00 | 0.00 | C | O |
| ATOM | 11389 | N   | ARG A 364 | 40.453 | -10.714 | -63.773 | 1.00 | 0.00 | C | N |
| ATOM | 11390 | CA  | ARG A 364 | 40.728 | -11.371 | -62.523 | 1.00 | 0.00 | C | C |
| ATOM | 11391 | CB  | ARG A 364 | 41.597 | -12.635 | -62.689 | 1.00 | 0.00 | C | C |
| ATOM | 11392 | CG  | ARG A 364 | 41.807 | -13.431 | -61.395 | 1.00 | 0.00 | C | C |
| ATOM | 11393 | CD  | ARG A 364 | 42.627 | -14.712 | -61.594 | 1.00 | 0.00 | C | C |
| ATOM | 11394 | NE  | ARG A 364 | 42.962 | -15.269 | -60.250 | 1.00 | 0.00 | C | N |
| ATOM | 11395 | CZ  | ARG A 364 | 42.118 | -16.137 | -59.617 | 1.00 | 0.00 | C | C |
| ATOM | 11396 | NH1 | ARG A 364 | 40.934 | -16.491 | -60.196 | 1.00 | 0.00 | C | N |
| ATOM | 11397 | NH2 | ARG A 364 | 42.465 | -16.662 | -58.404 | 1.00 | 0.00 | C | N |
| ATOM | 11398 | C   | ARG A 364 | 41.384 | -10.462 | -61.528 | 1.00 | 0.00 | C | C |
| ATOM | 11399 | O   | ARG A 364 | 41.028 | -10.485 | -60.353 | 1.00 | 0.00 | C | O |
| ATOM | 11400 | N   | HSD A 365 | 42.350 | -9.625  | -61.945 | 1.00 | 0.00 | C | N |
| ATOM | 11401 | CA  | HSD A 365 | 43.035 | -8.817  | -60.972 | 1.00 | 0.00 | C | C |
| ATOM | 11402 | CB  | HSD A 365 | 44.205 | -8.008  | -61.550 | 1.00 | 0.00 | C | C |
| ATOM | 11403 | ND1 | HSD A 365 | 42.937 | -6.936  | -63.446 | 1.00 | 0.00 | C | N |
| ATOM | 11404 | CG  | HSD A 365 | 43.749 | -6.831  | -62.344 | 1.00 | 0.00 | C | C |
| ATOM | 11405 | CE1 | HSD A 365 | 42.734 | -5.678  | -63.906 | 1.00 | 0.00 | C | C |
| ATOM | 11406 | NE2 | HSD A 365 | 43.359 | -4.772  | -63.177 | 1.00 | 0.00 | C | N |
| ATOM | 11407 | CD2 | HSD A 365 | 43.998 | -5.502  | -62.193 | 1.00 | 0.00 | C | C |
| ATOM | 11408 | C   | HSD A 365 | 42.070 | -7.854  | -60.340 | 1.00 | 0.00 | C | C |
| ATOM | 11409 | O   | HSD A 365 | 42.163 | -7.567  | -59.147 | 1.00 | 0.00 | C | O |
| ATOM | 11410 | N   | LEU A 366 | 41.142 | -7.305  | -61.144 | 1.00 | 0.00 | C | N |
| ATOM | 11411 | CA  | LEU A 366 | 40.164 | -6.324  | -60.736 | 1.00 | 0.00 | C | C |
| ATOM | 11412 | CB  | LEU A 366 | 39.414 | -5.768  | -61.964 | 1.00 | 0.00 | C | C |
| ATOM | 11413 | CG  | LEU A 366 | 38.397 | -4.653  | -61.663 | 1.00 | 0.00 | C | C |
| ATOM | 11414 | CD1 | LEU A 366 | 39.094 | -3.384  | -61.150 | 1.00 | 0.00 | C | C |
| ATOM | 11415 | CD2 | LEU A 366 | 37.498 | -4.384  | -62.883 | 1.00 | 0.00 | C | C |
| ATOM | 11416 | C   | LEU A 366 | 39.124 | -6.870  | -59.784 | 1.00 | 0.00 | C | C |
| ATOM | 11417 | O   | LEU A 366 | 38.776 | -6.204  | -58.807 | 1.00 | 0.00 | C | O |
| ATOM | 11418 | N   | SER A 367 | 38.603 | -8.094  | -60.030 | 1.00 | 0.00 | C | N |

|      |       |     |           |        |         |         |      |      |   |   |
|------|-------|-----|-----------|--------|---------|---------|------|------|---|---|
| ATOM | 11419 | CA  | SER A 367 | 37.447 | -8.567  | -59.303 | 1.00 | 0.00 | C | C |
| ATOM | 11420 | CB  | SER A 367 | 36.719 | -9.740  | -59.986 | 1.00 | 0.00 | C | C |
| ATOM | 11421 | OG  | SER A 367 | 37.541 | -10.897 | -60.009 | 1.00 | 0.00 | C | O |
| ATOM | 11422 | C   | SER A 367 | 37.737 | -8.983  | -57.900 | 1.00 | 0.00 | C | C |
| ATOM | 11423 | O   | SER A 367 | 38.760 | -9.589  | -57.591 | 1.00 | 0.00 | C | O |
| ATOM | 11424 | N   | ARG A 368 | 36.844 | -8.559  | -56.986 | 1.00 | 0.00 | C | N |
| ATOM | 11425 | CA  | ARG A 368 | 36.898 | -8.941  | -55.612 | 1.00 | 0.00 | C | C |
| ATOM | 11426 | CB  | ARG A 368 | 36.393 | -7.820  | -54.716 | 1.00 | 0.00 | C | C |
| ATOM | 11427 | CG  | ARG A 368 | 37.118 | -6.489  | -54.929 | 1.00 | 0.00 | C | C |
| ATOM | 11428 | CD  | ARG A 368 | 37.983 | -6.057  | -53.748 | 1.00 | 0.00 | C | C |
| ATOM | 11429 | NE  | ARG A 368 | 38.270 | -7.291  | -52.979 | 1.00 | 0.00 | C | N |
| ATOM | 11430 | CZ  | ARG A 368 | 37.428 | -7.612  | -51.961 | 1.00 | 0.00 | C | C |
| ATOM | 11431 | NH1 | ARG A 368 | 36.464 | -6.724  | -51.589 | 1.00 | 0.00 | C | N |
| ATOM | 11432 | NH2 | ARG A 368 | 37.505 | -8.817  | -51.336 | 1.00 | 0.00 | C | N |
| ATOM | 11433 | C   | ARG A 368 | 36.251 | -10.288 | -55.354 | 1.00 | 0.00 | C | C |
| ATOM | 11434 | O   | ARG A 368 | 36.707 | -11.027 | -54.494 | 1.00 | 0.00 | C | O |
| ATOM | 11435 | N   | LYS A 369 | 35.168 | -10.685 | -56.061 | 1.00 | 0.00 | C | N |
| ATOM | 11436 | CA  | LYS A 369 | 34.582 | -11.957 | -55.711 | 1.00 | 0.00 | C | C |
| ATOM | 11437 | CB  | LYS A 369 | 33.154 | -11.841 | -55.143 | 1.00 | 0.00 | C | C |
| ATOM | 11438 | CG  | LYS A 369 | 32.109 | -11.328 | -56.134 | 1.00 | 0.00 | C | C |
| ATOM | 11439 | CD  | LYS A 369 | 30.676 | -11.492 | -55.623 | 1.00 | 0.00 | C | C |
| ATOM | 11440 | CE  | LYS A 369 | 29.609 | -10.985 | -56.594 | 1.00 | 0.00 | C | C |
| ATOM | 11441 | NZ  | LYS A 369 | 28.271 | -11.077 | -55.968 | 1.00 | 0.00 | C | N |
| ATOM | 11442 | C   | LYS A 369 | 34.527 | -12.880 | -56.898 | 1.00 | 0.00 | C | C |
| ATOM | 11443 | O   | LYS A 369 | 34.179 | -12.480 | -58.012 | 1.00 | 0.00 | C | O |
| ATOM | 11444 | N   | PHE A 370 | 34.881 | -14.164 | -56.663 | 1.00 | 0.00 | C | N |
| ATOM | 11445 | CA  | PHE A 370 | 34.878 | -15.177 | -57.683 | 1.00 | 0.00 | C | C |
| ATOM | 11446 | CB  | PHE A 370 | 36.239 | -15.877 | -57.814 | 1.00 | 0.00 | C | C |
| ATOM | 11447 | CG  | PHE A 370 | 37.304 | -14.852 | -58.014 | 1.00 | 0.00 | C | C |
| ATOM | 11448 | CD1 | PHE A 370 | 37.689 | -14.052 | -56.965 | 1.00 | 0.00 | C | C |
| ATOM | 11449 | CE1 | PHE A 370 | 38.675 | -13.107 | -57.119 | 1.00 | 0.00 | C | C |
| ATOM | 11450 | CZ  | PHE A 370 | 39.295 | -12.958 | -58.337 | 1.00 | 0.00 | C | C |
| ATOM | 11451 | CD2 | PHE A 370 | 37.936 | -14.705 | -59.227 | 1.00 | 0.00 | C | C |
| ATOM | 11452 | CE2 | PHE A 370 | 38.922 | -13.761 | -59.388 | 1.00 | 0.00 | C | C |
| ATOM | 11453 | C   | PHE A 370 | 33.969 | -16.259 | -57.181 | 1.00 | 0.00 | C | C |
| ATOM | 11454 | O   | PHE A 370 | 34.142 | -16.727 | -56.062 | 1.00 | 0.00 | C | O |
| ATOM | 11455 | N   | THR A 371 | 32.974 | -16.702 | -57.970 | 1.00 | 0.00 | C | N |
| ATOM | 11456 | CA  | THR A 371 | 32.138 | -17.751 | -57.454 | 1.00 | 0.00 | C | C |

|      |       |               |        |         |         |      |      |   |   |
|------|-------|---------------|--------|---------|---------|------|------|---|---|
| ATOM | 11457 | CB THR A 371  | 30.785 | -17.252 | -57.036 | 1.00 | 0.00 | C | C |
| ATOM | 11458 | OG1 THR A 371 | 30.023 | -16.850 | -58.166 | 1.00 | 0.00 | C | O |
| ATOM | 11459 | CG2 THR A 371 | 31.006 | -16.027 | -56.138 | 1.00 | 0.00 | C | C |
| ATOM | 11460 | C THR A 371   | 31.910 | -18.732 | -58.563 | 1.00 | 0.00 | C | C |
| ATOM | 11461 | O THR A 371   | 31.507 | -18.335 | -59.655 | 1.00 | 0.00 | C | O |
| ATOM | 11462 | N GLU A 372   | 32.175 | -20.038 | -58.339 | 1.00 | 0.00 | C | N |
| ATOM | 11463 | CA GLU A 372  | 31.862 | -20.934 | -59.417 | 1.00 | 0.00 | C | C |
| ATOM | 11464 | CB GLU A 372  | 32.973 | -21.048 | -60.477 | 1.00 | 0.00 | C | C |
| ATOM | 11465 | CG GLU A 372  | 33.151 | -19.777 | -61.306 | 1.00 | 0.00 | C | C |
| ATOM | 11466 | CD GLU A 372  | 34.160 | -20.061 | -62.405 | 1.00 | 0.00 | C | C |
| ATOM | 11467 | OE1 GLU A 372 | 34.396 | -21.263 | -62.693 | 1.00 | 0.00 | C | O |
| ATOM | 11468 | OE2 GLU A 372 | 34.703 | -19.077 | -62.975 | 1.00 | 0.00 | C | O |
| ATOM | 11469 | C GLU A 372   | 31.586 | -22.323 | -58.912 | 1.00 | 0.00 | C | C |
| ATOM | 11470 | O GLU A 372   | 32.480 | -23.167 | -58.874 | 1.00 | 0.00 | C | O |
| ATOM | 11471 | N TRP A 373   | 30.323 | -22.594 | -58.523 | 1.00 | 0.00 | C | N |
| ATOM | 11472 | CA TRP A 373  | 29.884 | -23.911 | -58.151 | 1.00 | 0.00 | C | C |
| ATOM | 11473 | CB TRP A 373  | 30.199 | -24.305 | -56.692 | 1.00 | 0.00 | C | C |
| ATOM | 11474 | CG TRP A 373  | 31.626 | -24.704 | -56.388 | 1.00 | 0.00 | C | C |
| ATOM | 11475 | CD1 TRP A 373 | 32.745 | -23.934 | -56.249 | 1.00 | 0.00 | C | C |
| ATOM | 11476 | NE1 TRP A 373 | 33.823 | -24.725 | -55.924 | 1.00 | 0.00 | C | N |
| ATOM | 11477 | CE2 TRP A 373 | 33.396 | -26.036 | -55.844 | 1.00 | 0.00 | C | C |
| ATOM | 11478 | CD2 TRP A 373 | 32.031 | -26.056 | -56.129 | 1.00 | 0.00 | C | C |
| ATOM | 11479 | CE3 TRP A 373 | 31.321 | -27.224 | -56.125 | 1.00 | 0.00 | C | C |
| ATOM | 11480 | CZ3 TRP A 373 | 32.007 | -28.383 | -55.829 | 1.00 | 0.00 | C | C |
| ATOM | 11481 | CZ2 TRP A 373 | 34.072 | -27.184 | -55.551 | 1.00 | 0.00 | C | C |
| ATOM | 11482 | CH2 TRP A 373 | 33.358 | -28.362 | -55.549 | 1.00 | 0.00 | C | C |
| ATOM | 11483 | C TRP A 373   | 28.391 | -23.888 | -58.256 | 1.00 | 0.00 | C | C |
| ATOM | 11484 | O TRP A 373   | 27.722 | -23.240 | -57.455 | 1.00 | 0.00 | C | O |
| ATOM | 11485 | N ALA A 374   | 27.788 | -24.595 | -59.227 | 1.00 | 0.00 | C | N |
| ATOM | 11486 | CA ALA A 374  | 26.355 | -24.478 | -59.226 | 1.00 | 0.00 | C | C |
| ATOM | 11487 | CB ALA A 374  | 25.823 | -23.398 | -60.186 | 1.00 | 0.00 | C | C |
| ATOM | 11488 | C ALA A 374   | 25.727 | -25.767 | -59.638 | 1.00 | 0.00 | C | C |
| ATOM | 11489 | O ALA A 374   | 26.151 | -26.401 | -60.603 | 1.00 | 0.00 | C | O |
| ATOM | 11490 | N TYR A 375   | 24.694 | -26.199 | -58.883 | 1.00 | 0.00 | C | N |
| ATOM | 11491 | CA TYR A 375  | 23.966 | -27.376 | -59.257 | 1.00 | 0.00 | C | C |
| ATOM | 11492 | CB TYR A 375  | 24.148 | -28.556 | -58.290 | 1.00 | 0.00 | C | C |
| ATOM | 11493 | CG TYR A 375  | 23.775 | -29.790 | -59.040 | 1.00 | 0.00 | C | C |
| ATOM | 11494 | CD1 TYR A 375 | 24.627 | -30.340 | -59.970 | 1.00 | 0.00 | C | C |

|            |               |        |         |         |      |      |   |   |
|------------|---------------|--------|---------|---------|------|------|---|---|
| ATOM 11495 | CE1 TYR A 375 | 24.275 | -31.478 | -60.659 | 1.00 | 0.00 | C | C |
| ATOM 11496 | CZ TYR A 375  | 23.063 | -32.079 | -60.417 | 1.00 | 0.00 | C | C |
| ATOM 11497 | OH TYR A 375  | 22.695 | -33.246 | -61.122 | 1.00 | 0.00 | C | O |
| ATOM 11498 | CD2 TYR A 375 | 22.565 | -30.404 | -58.804 | 1.00 | 0.00 | C | C |
| ATOM 11499 | CE2 TYR A 375 | 22.209 | -31.541 | -59.489 | 1.00 | 0.00 | C | C |
| ATOM 11500 | C TYR A 375   | 22.506 | -27.067 | -59.259 | 1.00 | 0.00 | C | C |
| ATOM 11501 | O TYR A 375   | 21.880 | -27.049 | -58.201 | 1.00 | 0.00 | C | O |
| ATOM 11502 | N GLY A 376   | 21.945 | -26.736 | -60.436 | 1.00 | 0.00 | C | N |
| ATOM 11503 | CA GLY A 376  | 20.525 | -26.620 | -60.592 | 1.00 | 0.00 | C | C |
| ATOM 11504 | C GLY A 376   | 20.037 | -25.476 | -59.764 | 1.00 | 0.00 | C | C |
| ATOM 11505 | O GLY A 376   | 19.982 | -24.313 | -60.158 | 1.00 | 0.00 | C | O |
| ATOM 11506 | N PRO A 377   | 19.600 | -25.920 | -58.619 | 1.00 | 0.00 | C | N |
| ATOM 11507 | CD PRO A 377  | 19.044 | -27.260 | -58.554 | 1.00 | 0.00 | C | C |
| ATOM 11508 | CA PRO A 377  | 19.090 | -25.079 | -57.565 | 1.00 | 0.00 | C | C |
| ATOM 11509 | CB PRO A 377  | 18.082 | -25.927 | -56.793 | 1.00 | 0.00 | C | C |
| ATOM 11510 | CG PRO A 377  | 18.451 | -27.376 | -57.145 | 1.00 | 0.00 | C | C |
| ATOM 11511 | C PRO A 377   | 20.118 | -24.493 | -56.653 | 1.00 | 0.00 | C | C |
| ATOM 11512 | O PRO A 377   | 19.759 | -23.609 | -55.877 | 1.00 | 0.00 | C | O |
| ATOM 11513 | N VAL A 378   | 21.384 | -24.960 | -56.701 | 1.00 | 0.00 | C | N |
| ATOM 11514 | CA VAL A 378  | 22.318 | -24.550 | -55.689 | 1.00 | 0.00 | C | C |
| ATOM 11515 | CB VAL A 378  | 23.066 | -25.706 | -55.083 | 1.00 | 0.00 | C | C |
| ATOM 11516 | CG1 VAL A 378 | 23.937 | -26.357 | -56.166 | 1.00 | 0.00 | C | C |
| ATOM 11517 | CG2 VAL A 378 | 23.858 | -25.211 | -53.861 | 1.00 | 0.00 | C | C |
| ATOM 11518 | C VAL A 378   | 23.306 | -23.579 | -56.251 | 1.00 | 0.00 | C | C |
| ATOM 11519 | O VAL A 378   | 23.460 | -23.457 | -57.465 | 1.00 | 0.00 | C | O |
| ATOM 11520 | N HSD A 379   | 23.973 | -22.821 | -55.359 | 1.00 | 0.00 | C | N |
| ATOM 11521 | CA HSD A 379  | 24.903 | -21.830 | -55.812 | 1.00 | 0.00 | C | C |
| ATOM 11522 | CB HSD A 379  | 24.225 | -20.463 | -55.993 | 1.00 | 0.00 | C | C |
| ATOM 11523 | ND1 HSD A 379 | 25.901 | -18.552 | -55.962 | 1.00 | 0.00 | C | N |
| ATOM 11524 | CG HSD A 379  | 25.086 | -19.428 | -56.643 | 1.00 | 0.00 | C | C |
| ATOM 11525 | CE1 HSD A 379 | 26.498 | -17.768 | -56.893 | 1.00 | 0.00 | C | C |
| ATOM 11526 | NE2 HSD A 379 | 26.126 | -18.078 | -58.123 | 1.00 | 0.00 | C | N |
| ATOM 11527 | CD2 HSD A 379 | 25.235 | -19.126 | -57.962 | 1.00 | 0.00 | C | C |
| ATOM 11528 | C HSD A 379   | 25.977 | -21.678 | -54.774 | 1.00 | 0.00 | C | C |
| ATOM 11529 | O HSD A 379   | 25.757 | -21.946 | -53.595 | 1.00 | 0.00 | C | O |
| ATOM 11530 | N SER A 380   | 27.185 | -21.259 | -55.203 | 1.00 | 0.00 | C | N |
| ATOM 11531 | CA SER A 380  | 28.273 | -21.042 | -54.292 | 1.00 | 0.00 | C | C |
| ATOM 11532 | CB SER A 380  | 29.400 | -22.081 | -54.403 | 1.00 | 0.00 | C | C |

|      |       |     |           |        |         |         |      |      |   |   |
|------|-------|-----|-----------|--------|---------|---------|------|------|---|---|
| ATOM | 11533 | OG  | SER A 380 | 30.432 | -21.780 | -53.475 | 1.00 | 0.00 | C | O |
| ATOM | 11534 | C   | SER A 380 | 28.878 | -19.723 | -54.648 | 1.00 | 0.00 | C | C |
| ATOM | 11535 | O   | SER A 380 | 28.944 | -19.357 | -55.818 | 1.00 | 0.00 | C | O |
| ATOM | 11536 | N   | SER A 381 | 29.335 | -18.960 | -53.637 | 1.00 | 0.00 | C | N |
| ATOM | 11537 | CA  | SER A 381 | 29.921 | -17.691 | -53.950 | 1.00 | 0.00 | C | C |
| ATOM | 11538 | CB  | SER A 381 | 29.012 | -16.513 | -53.548 | 1.00 | 0.00 | C | C |
| ATOM | 11539 | OG  | SER A 381 | 29.610 | -15.267 | -53.863 | 1.00 | 0.00 | C | O |
| ATOM | 11540 | C   | SER A 381 | 31.196 | -17.576 | -53.182 | 1.00 | 0.00 | C | C |
| ATOM | 11541 | O   | SER A 381 | 31.269 | -17.998 | -52.030 | 1.00 | 0.00 | C | O |
| ATOM | 11542 | N   | LEU A 382 | 32.257 | -17.032 | -53.813 | 1.00 | 0.00 | C | N |
| ATOM | 11543 | CA  | LEU A 382 | 33.466 | -16.823 | -53.074 | 1.00 | 0.00 | C | C |
| ATOM | 11544 | CB  | LEU A 382 | 34.715 | -17.601 | -53.543 | 1.00 | 0.00 | C | C |
| ATOM | 11545 | CG  | LEU A 382 | 34.649 | -19.119 | -53.291 | 1.00 | 0.00 | C | C |
| ATOM | 11546 | CD1 | LEU A 382 | 33.532 | -19.777 | -54.113 | 1.00 | 0.00 | C | C |
| ATOM | 11547 | CD2 | LEU A 382 | 36.020 | -19.778 | -53.502 | 1.00 | 0.00 | C | C |
| ATOM | 11548 | C   | LEU A 382 | 33.777 | -15.364 | -53.094 | 1.00 | 0.00 | C | C |
| ATOM | 11549 | O   | LEU A 382 | 33.512 | -14.663 | -54.073 | 1.00 | 0.00 | C | O |
| ATOM | 11550 | N   | TYR A 383 | 34.343 | -14.873 | -51.972 | 1.00 | 0.00 | C | N |
| ATOM | 11551 | CA  | TYR A 383 | 34.653 | -13.478 | -51.835 | 1.00 | 0.00 | C | C |
| ATOM | 11552 | CB  | TYR A 383 | 33.868 | -12.830 | -50.695 | 1.00 | 0.00 | C | C |
| ATOM | 11553 | CG  | TYR A 383 | 32.441 | -12.919 | -51.123 | 1.00 | 0.00 | C | C |
| ATOM | 11554 | CD1 | TYR A 383 | 31.765 | -14.113 | -51.028 | 1.00 | 0.00 | C | C |
| ATOM | 11555 | CE1 | TYR A 383 | 30.454 | -14.215 | -51.431 | 1.00 | 0.00 | C | C |
| ATOM | 11556 | CZ  | TYR A 383 | 29.799 | -13.120 | -51.940 | 1.00 | 0.00 | C | C |
| ATOM | 11557 | OH  | TYR A 383 | 28.452 | -13.227 | -52.347 | 1.00 | 0.00 | C | O |
| ATOM | 11558 | CD2 | TYR A 383 | 31.786 | -11.831 | -51.658 | 1.00 | 0.00 | C | C |
| ATOM | 11559 | CE2 | TYR A 383 | 30.471 | -11.928 | -52.059 | 1.00 | 0.00 | C | C |
| ATOM | 11560 | C   | TYR A 383 | 36.130 | -13.372 | -51.605 | 1.00 | 0.00 | C | C |
| ATOM | 11561 | O   | TYR A 383 | 36.726 | -14.216 | -50.941 | 1.00 | 0.00 | C | O |
| ATOM | 11562 | N   | ASP A 384 | 36.769 | -12.326 | -52.172 | 1.00 | 0.00 | C | N |
| ATOM | 11563 | CA  | ASP A 384 | 38.206 | -12.262 | -52.150 | 1.00 | 0.00 | C | C |
| ATOM | 11564 | CB  | ASP A 384 | 38.774 | -10.963 | -52.742 | 1.00 | 0.00 | C | C |
| ATOM | 11565 | CG  | ASP A 384 | 40.255 | -11.119 | -53.020 | 1.00 | 0.00 | C | C |
| ATOM | 11566 | OD1 | ASP A 384 | 40.756 | -12.275 | -52.999 | 1.00 | 0.00 | C | O |
| ATOM | 11567 | OD2 | ASP A 384 | 40.905 | -10.070 | -53.275 | 1.00 | 0.00 | C | O |
| ATOM | 11568 | C   | ASP A 384 | 38.626 | -12.242 | -50.754 | 1.00 | 0.00 | C | C |
| ATOM | 11569 | O   | ASP A 384 | 39.353 | -13.110 | -50.275 | 1.00 | 0.00 | C | O |
| ATOM | 11570 | N   | LEU A 385 | 38.073 | -11.203 | -50.134 | 1.00 | 0.00 | C | N |

|      |       |     |     |   |     |        |         |         |      |      |   |   |
|------|-------|-----|-----|---|-----|--------|---------|---------|------|------|---|---|
| ATOM | 11571 | CA  | LEU | A | 385 | 38.034 | -10.716 | -48.829 | 1.00 | 0.00 | C | C |
| ATOM | 11572 | CB  | LEU | A | 385 | 37.988 | -11.832 | -47.776 | 1.00 | 0.00 | C | C |
| ATOM | 11573 | CG  | LEU | A | 385 | 37.313 | -11.387 | -46.470 | 1.00 | 0.00 | C | C |
| ATOM | 11574 | CD1 | LEU | A | 385 | 37.676 | -12.314 | -45.305 | 1.00 | 0.00 | C | C |
| ATOM | 11575 | CD2 | LEU | A | 385 | 37.480 | -9.895  | -46.195 | 1.00 | 0.00 | C | C |
| ATOM | 11576 | C   | LEU | A | 385 | 39.200 | -9.809  | -48.578 | 1.00 | 0.00 | C | C |
| ATOM | 11577 | O   | LEU | A | 385 | 40.134 | -10.168 | -47.861 | 1.00 | 0.00 | C | O |
| ATOM | 11578 | N   | SER | A | 386 | 39.158 | -8.597  | -49.167 | 1.00 | 0.00 | C | N |
| ATOM | 11579 | CA  | SER | A | 386 | 40.144 | -7.579  | -48.940 | 1.00 | 0.00 | C | C |
| ATOM | 11580 | CB  | SER | A | 386 | 40.112 | -6.469  | -50.009 | 1.00 | 0.00 | C | C |
| ATOM | 11581 | OG  | SER | A | 386 | 38.896 | -5.741  | -49.933 | 1.00 | 0.00 | C | O |
| ATOM | 11582 | C   | SER | A | 386 | 39.883 | -6.925  | -47.612 | 1.00 | 0.00 | C | C |
| ATOM | 11583 | O   | SER | A | 386 | 40.809 | -6.532  | -46.907 | 1.00 | 0.00 | C | O |
| ATOM | 11584 | N   | CYS | A | 387 | 38.598 | -6.845  | -47.224 | 1.00 | 0.00 | C | N |
| ATOM | 11585 | CA  | CYS | A | 387 | 38.118 | -6.135  | -46.066 | 1.00 | 0.00 | C | C |
| ATOM | 11586 | CB  | CYS | A | 387 | 36.648 | -6.483  | -45.813 | 1.00 | 0.00 | C | C |
| ATOM | 11587 | SG  | CYS | A | 387 | 35.652 | -6.355  | -47.322 | 1.00 | 0.00 | C | S |
| ATOM | 11588 | C   | CYS | A | 387 | 38.815 | -6.637  | -44.848 | 1.00 | 0.00 | C | C |
| ATOM | 11589 | O   | CYS | A | 387 | 39.282 | -5.867  | -44.011 | 1.00 | 0.00 | C | O |
| ATOM | 11590 | N   | ILE | A | 388 | 38.879 | -7.964  | -44.713 | 1.00 | 0.00 | C | N |
| ATOM | 11591 | CA  | ILE | A | 388 | 39.497 | -8.602  | -43.597 | 1.00 | 0.00 | C | C |
| ATOM | 11592 | CB  | ILE | A | 388 | 39.387 | -10.099 | -43.639 | 1.00 | 0.00 | C | C |
| ATOM | 11593 | CG2 | ILE | A | 388 | 40.053 | -10.593 | -44.935 | 1.00 | 0.00 | C | C |
| ATOM | 11594 | CG1 | ILE | A | 388 | 39.987 | -10.709 | -42.360 | 1.00 | 0.00 | C | C |
| ATOM | 11595 | CD  | ILE | A | 388 | 39.236 | -10.335 | -41.083 | 1.00 | 0.00 | C | C |
| ATOM | 11596 | C   | ILE | A | 388 | 40.944 | -8.250  | -43.623 | 1.00 | 0.00 | C | C |
| ATOM | 11597 | O   | ILE | A | 388 | 41.559 | -8.055  | -42.580 | 1.00 | 0.00 | C | O |
| ATOM | 11598 | N   | ASP | A | 389 | 41.520 | -8.179  | -44.836 | 1.00 | 0.00 | C | N |
| ATOM | 11599 | CA  | ASP | A | 389 | 42.920 | -7.943  | -45.009 | 1.00 | 0.00 | C | C |
| ATOM | 11600 | CB  | ASP | A | 389 | 43.357 | -8.022  | -46.481 | 1.00 | 0.00 | C | C |
| ATOM | 11601 | CG  | ASP | A | 389 | 43.264 | -9.474  | -46.934 | 1.00 | 0.00 | C | C |
| ATOM | 11602 | OD1 | ASP | A | 389 | 43.544 | -10.376 | -46.101 | 1.00 | 0.00 | C | O |
| ATOM | 11603 | OD2 | ASP | A | 389 | 42.908 | -9.697  | -48.121 | 1.00 | 0.00 | C | O |
| ATOM | 11604 | C   | ASP | A | 389 | 43.331 | -6.595  | -44.498 | 1.00 | 0.00 | C | C |
| ATOM | 11605 | O   | ASP | A | 389 | 44.365 | -6.487  | -43.843 | 1.00 | 0.00 | C | O |
| ATOM | 11606 | N   | THR | A | 390 | 42.553 | -5.522  | -44.750 | 1.00 | 0.00 | C | N |
| ATOM | 11607 | CA  | THR | A | 390 | 43.114 | -4.255  | -44.382 | 1.00 | 0.00 | C | C |
| ATOM | 11608 | CB  | THR | A | 390 | 42.415 | -3.082  | -45.001 | 1.00 | 0.00 | C | C |

|      |       |               |        |        |         |      |      |   |   |
|------|-------|---------------|--------|--------|---------|------|------|---|---|
| ATOM | 11609 | OG1 THR A 390 | 42.269 | -3.297 | -46.398 | 1.00 | 0.00 | C | O |
| ATOM | 11610 | CG2 THR A 390 | 43.328 | -1.854 | -44.821 | 1.00 | 0.00 | C | C |
| ATOM | 11611 | C THR A 390   | 43.157 | -4.142 | -42.883 | 1.00 | 0.00 | C | C |
| ATOM | 11612 | O THR A 390   | 42.126 | -4.237 | -42.223 | 1.00 | 0.00 | C | O |
| ATOM | 11613 | N CYS A 391   | 44.373 | -4.206 | -42.284 | 1.00 | 0.00 | C | N |
| ATOM | 11614 | CA CYS A 391  | 44.556 | -3.959 | -40.873 | 1.00 | 0.00 | C | C |
| ATOM | 11615 | CB CYS A 391  | 45.578 | -4.916 | -40.238 | 1.00 | 0.00 | C | C |
| ATOM | 11616 | SG CYS A 391  | 45.740 | -4.656 | -38.445 | 1.00 | 0.00 | C | S |
| ATOM | 11617 | C CYS A 391   | 44.957 | -2.566 | -40.453 | 1.00 | 0.00 | C | C |
| ATOM | 11618 | O CYS A 391   | 44.297 | -1.922 | -39.639 | 1.00 | 0.00 | C | O |
| ATOM | 11619 | N GLU A 392   | 46.068 | -2.057 | -41.043 | 1.00 | 0.00 | C | N |
| ATOM | 11620 | CA GLU A 392  | 46.735 | -0.865 | -40.576 | 1.00 | 0.00 | C | C |
| ATOM | 11621 | CB GLU A 392  | 48.001 | -0.568 | -41.400 | 1.00 | 0.00 | C | C |
| ATOM | 11622 | CG GLU A 392  | 48.859 | 0.574  | -40.862 | 1.00 | 0.00 | C | C |
| ATOM | 11623 | CD GLU A 392  | 50.051 | 0.712  | -41.797 | 1.00 | 0.00 | C | C |
| ATOM | 11624 | OE1 GLU A 392 | 49.914 | 0.318  | -42.985 | 1.00 | 0.00 | C | O |
| ATOM | 11625 | OE2 GLU A 392 | 51.116 | 1.211  | -41.339 | 1.00 | 0.00 | C | O |
| ATOM | 11626 | C GLU A 392   | 45.819 | 0.295  | -40.700 | 1.00 | 0.00 | C | C |
| ATOM | 11627 | O GLU A 392   | 45.662 | 1.098  | -39.780 | 1.00 | 0.00 | C | O |
| ATOM | 11628 | N LYS A 393   | 45.187 | 0.397  | -41.874 | 1.00 | 0.00 | C | N |
| ATOM | 11629 | CA LYS A 393  | 44.216 | 1.408  | -42.108 | 1.00 | 0.00 | C | C |
| ATOM | 11630 | CB LYS A 393  | 43.992 | 1.625  | -43.611 | 1.00 | 0.00 | C | C |
| ATOM | 11631 | CG LYS A 393  | 45.284 | 2.136  | -44.258 | 1.00 | 0.00 | C | C |
| ATOM | 11632 | CD LYS A 393  | 45.380 | 1.968  | -45.776 | 1.00 | 0.00 | C | C |
| ATOM | 11633 | CE LYS A 393  | 46.724 | 2.445  | -46.336 | 1.00 | 0.00 | C | C |
| ATOM | 11634 | NZ LYS A 393  | 46.833 | 2.114  | -47.772 | 1.00 | 0.00 | C | N |
| ATOM | 11635 | C LYS A 393   | 42.981 | 0.901  | -41.439 | 1.00 | 0.00 | C | C |
| ATOM | 11636 | O LYS A 393   | 42.911 | -0.277 | -41.092 | 1.00 | 0.00 | C | O |
| ATOM | 11637 | N ASN A 394   | 41.993 | 1.781  | -41.193 | 1.00 | 0.00 | C | N |
| ATOM | 11638 | CA ASN A 394  | 40.814 | 1.328  | -40.516 | 1.00 | 0.00 | C | C |
| ATOM | 11639 | CB ASN A 394  | 39.760 | 2.434  | -40.341 | 1.00 | 0.00 | C | C |
| ATOM | 11640 | CG ASN A 394  | 40.306 | 3.408  | -39.309 | 1.00 | 0.00 | C | C |
| ATOM | 11641 | OD1 ASN A 394 | 40.601 | 4.560  | -39.616 | 1.00 | 0.00 | C | O |
| ATOM | 11642 | ND2 ASN A 394 | 40.454 | 2.926  | -38.045 | 1.00 | 0.00 | C | N |
| ATOM | 11643 | C ASN A 394   | 40.221 | 0.242  | -41.347 | 1.00 | 0.00 | C | C |
| ATOM | 11644 | O ASN A 394   | 39.846 | -0.790 | -40.811 | 1.00 | 0.00 | C | O |
| ATOM | 11645 | N SER A 395   | 40.105 | 0.434  | -42.673 | 1.00 | 0.00 | C | N |
| ATOM | 11646 | CA SER A 395  | 39.683 | -0.628 | -43.554 | 1.00 | 0.00 | C | C |

|            |               |        |        |         |      |      |   |   |
|------------|---------------|--------|--------|---------|------|------|---|---|
| ATOM 11647 | CB SER A 395  | 40.259 | -2.002 | -43.194 | 1.00 | 0.00 | C | C |
| ATOM 11648 | OG SER A 395  | 41.566 | -1.789 | -42.690 | 1.00 | 0.00 | C | O |
| ATOM 11649 | C SER A 395   | 38.191 | -0.721 | -43.568 | 1.00 | 0.00 | C | C |
| ATOM 11650 | O SER A 395   | 37.505 | -0.096 | -42.762 | 1.00 | 0.00 | C | O |
| ATOM 11651 | N VAL A 396   | 37.648 | -1.479 | -44.540 | 1.00 | 0.00 | C | N |
| ATOM 11652 | CA VAL A 396  | 36.225 | -1.629 | -44.594 | 1.00 | 0.00 | C | C |
| ATOM 11653 | CB VAL A 396  | 35.728 | -2.185 | -45.895 | 1.00 | 0.00 | C | C |
| ATOM 11654 | CG1 VAL A 396 | 36.286 | -3.593 | -46.081 | 1.00 | 0.00 | C | C |
| ATOM 11655 | CG2 VAL A 396 | 34.194 | -2.092 | -45.916 | 1.00 | 0.00 | C | C |
| ATOM 11656 | C VAL A 396   | 35.760 | -2.452 | -43.427 | 1.00 | 0.00 | C | C |
| ATOM 11657 | O VAL A 396   | 34.744 | -2.144 | -42.808 | 1.00 | 0.00 | C | O |
| ATOM 11658 | N LEU A 397   | 36.491 | -3.533 | -43.093 | 1.00 | 0.00 | C | N |
| ATOM 11659 | CA LEU A 397  | 36.093 | -4.361 | -41.987 | 1.00 | 0.00 | C | C |
| ATOM 11660 | CB LEU A 397  | 36.918 | -5.651 | -41.861 | 1.00 | 0.00 | C | C |
| ATOM 11661 | CG LEU A 397  | 36.479 | -6.524 | -40.670 | 1.00 | 0.00 | C | C |
| ATOM 11662 | CD1 LEU A 397 | 35.008 | -6.952 | -40.808 | 1.00 | 0.00 | C | C |
| ATOM 11663 | CD2 LEU A 397 | 37.426 | -7.718 | -40.473 | 1.00 | 0.00 | C | C |
| ATOM 11664 | C LEU A 397   | 36.226 | -3.611 | -40.697 | 1.00 | 0.00 | C | C |
| ATOM 11665 | O LEU A 397   | 35.327 | -3.660 | -39.862 | 1.00 | 0.00 | C | O |
| ATOM 11666 | N GLU A 398   | 37.345 | -2.891 | -40.466 | 1.00 | 0.00 | C | N |
| ATOM 11667 | CA GLU A 398  | 37.384 | -2.261 | -39.179 | 1.00 | 0.00 | C | C |
| ATOM 11668 | CB GLU A 398  | 38.728 | -1.799 | -38.595 | 1.00 | 0.00 | C | C |
| ATOM 11669 | CG GLU A 398  | 39.668 | -2.939 | -38.195 | 1.00 | 0.00 | C | C |
| ATOM 11670 | CD GLU A 398  | 40.399 | -3.419 | -39.438 | 1.00 | 0.00 | C | C |
| ATOM 11671 | OE1 GLU A 398 | 41.315 | -2.689 | -39.906 | 1.00 | 0.00 | C | O |
| ATOM 11672 | OE2 GLU A 398 | 40.053 | -4.522 | -39.940 | 1.00 | 0.00 | C | O |
| ATOM 11673 | C GLU A 398   | 36.398 | -1.149 | -39.100 | 1.00 | 0.00 | C | C |
| ATOM 11674 | O GLU A 398   | 35.855 | -0.896 | -38.029 | 1.00 | 0.00 | C | O |
| ATOM 11675 | N VAL A 399   | 36.140 | -0.433 | -40.212 | 1.00 | 0.00 | C | N |
| ATOM 11676 | CA VAL A 399  | 35.192 | 0.636  | -40.116 | 1.00 | 0.00 | C | C |
| ATOM 11677 | CB VAL A 399  | 35.074 | 1.465  | -41.362 | 1.00 | 0.00 | C | C |
| ATOM 11678 | CG1 VAL A 399 | 36.425 | 2.158  | -41.608 | 1.00 | 0.00 | C | C |
| ATOM 11679 | CG2 VAL A 399 | 34.630 | 0.572  | -42.522 | 1.00 | 0.00 | C | C |
| ATOM 11680 | C VAL A 399   | 33.855 | 0.053  | -39.767 | 1.00 | 0.00 | C | C |
| ATOM 11681 | O VAL A 399   | 33.122 | 0.614  | -38.955 | 1.00 | 0.00 | C | O |
| ATOM 11682 | N ILE A 400   | 33.501 | -1.106 | -40.353 | 1.00 | 0.00 | C | N |
| ATOM 11683 | CA ILE A 400  | 32.217 | -1.659 | -40.036 | 1.00 | 0.00 | C | C |
| ATOM 11684 | CB ILE A 400  | 31.828 | -2.874 | -40.823 | 1.00 | 0.00 | C | C |



|      |       |               |        |        |         |      |      |   |   |
|------|-------|---------------|--------|--------|---------|------|------|---|---|
| ATOM | 11685 | CG2 ILE A 400 | 32.676 | -4.073 | -40.379 | 1.00 | 0.00 | C | C |
| ATOM | 11686 | CG1 ILE A 400 | 30.326 | -3.114 | -40.633 | 1.00 | 0.00 | C | C |
| ATOM | 11687 | CD ILE A 400  | 29.785 | -4.218 | -41.526 | 1.00 | 0.00 | C | C |
| ATOM | 11688 | C ILE A 400   | 32.179 | -2.023 | -38.581 | 1.00 | 0.00 | C | C |
| ATOM | 11689 | O ILE A 400   | 31.164 | -1.831 | -37.913 | 1.00 | 0.00 | C | O |
| ATOM | 11690 | N ALA A 401   | 33.282 | -2.586 | -38.054 | 1.00 | 0.00 | C | N |
| ATOM | 11691 | CA ALA A 401  | 33.318 | -2.997 | -36.677 | 1.00 | 0.00 | C | C |
| ATOM | 11692 | CB ALA A 401  | 34.657 | -3.624 | -36.283 | 1.00 | 0.00 | C | C |
| ATOM | 11693 | C ALA A 401   | 33.169 | -1.813 | -35.765 | 1.00 | 0.00 | C | C |
| ATOM | 11694 | O ALA A 401   | 32.424 | -1.865 | -34.786 | 1.00 | 0.00 | C | O |
| ATOM | 11695 | N TYR A 402   | 33.929 | -0.742 | -36.054 | 1.00 | 0.00 | C | N |
| ATOM | 11696 | CA TYR A 402  | 34.044 | 0.476  | -35.295 | 1.00 | 0.00 | C | C |
| ATOM | 11697 | CB TYR A 402  | 35.297 | 1.250  | -35.767 | 1.00 | 0.00 | C | C |
| ATOM | 11698 | CG TYR A 402  | 35.534 | 2.536  | -35.044 | 1.00 | 0.00 | C | C |
| ATOM | 11699 | CD1 TYR A 402 | 36.071 | 2.545  | -33.776 | 1.00 | 0.00 | C | C |
| ATOM | 11700 | CE1 TYR A 402 | 36.307 | 3.734  | -33.122 | 1.00 | 0.00 | C | C |
| ATOM | 11701 | CZ TYR A 402  | 36.017 | 4.930  | -33.734 | 1.00 | 0.00 | C | C |
| ATOM | 11702 | OH TYR A 402  | 36.258 | 6.150  | -33.068 | 1.00 | 0.00 | C | O |
| ATOM | 11703 | CD2 TYR A 402 | 35.260 | 3.739  | -35.652 | 1.00 | 0.00 | C | C |
| ATOM | 11704 | CE2 TYR A 402 | 35.492 | 4.930  | -35.004 | 1.00 | 0.00 | C | C |
| ATOM | 11705 | C TYR A 402   | 32.840 | 1.382  | -35.388 | 1.00 | 0.00 | C | C |
| ATOM | 11706 | O TYR A 402   | 32.396 | 1.931  | -34.379 | 1.00 | 0.00 | C | O |
| ATOM | 11707 | N SER A 403   | 32.259 | 1.539  | -36.596 | 1.00 | 0.00 | C | N |
| ATOM | 11708 | CA SER A 403  | 31.287 | 2.573  | -36.862 | 1.00 | 0.00 | C | C |
| ATOM | 11709 | CB SER A 403  | 30.759 | 2.556  | -38.309 | 1.00 | 0.00 | C | C |
| ATOM | 11710 | OG SER A 403  | 31.819 | 2.832  | -39.213 | 1.00 | 0.00 | C | O |
| ATOM | 11711 | C SER A 403   | 30.089 | 2.538  | -35.960 | 1.00 | 0.00 | C | C |
| ATOM | 11712 | O SER A 403   | 29.521 | 1.484  | -35.687 | 1.00 | 0.00 | C | O |
| ATOM | 11713 | N SER A 404   | 29.670 | 3.740  | -35.493 | 1.00 | 0.00 | C | N |
| ATOM | 11714 | CA SER A 404  | 28.511 | 3.853  | -34.646 | 1.00 | 0.00 | C | C |
| ATOM | 11715 | CB SER A 404  | 28.815 | 3.765  | -33.139 | 1.00 | 0.00 | C | C |
| ATOM | 11716 | OG SER A 404  | 29.220 | 2.454  | -32.777 | 1.00 | 0.00 | C | O |
| ATOM | 11717 | C SER A 404   | 27.854 | 5.182  | -34.848 | 1.00 | 0.00 | C | C |
| ATOM | 11718 | O SER A 404   | 28.429 | 6.124  | -35.391 | 1.00 | 0.00 | C | O |
| ATOM | 11719 | N SER A 405   | 26.581 | 5.255  | -34.405 | 1.00 | 0.00 | C | N |
| ATOM | 11720 | CA SER A 405  | 25.797 | 6.455  | -34.349 | 1.00 | 0.00 | C | C |
| ATOM | 11721 | CB SER A 405  | 26.562 | 7.581  | -33.646 | 1.00 | 0.00 | C | C |
| ATOM | 11722 | OG SER A 405  | 27.007 | 7.125  | -32.381 | 1.00 | 0.00 | C | O |

|      |       |     |           |        |        |         |      |      |   |   |
|------|-------|-----|-----------|--------|--------|---------|------|------|---|---|
| ATOM | 11723 | C   | SER A 405 | 25.440 | 6.958  | -35.713 | 1.00 | 0.00 | C | C |
| ATOM | 11724 | O   | SER A 405 | 24.788 | 7.995  | -35.830 | 1.00 | 0.00 | C | O |
| ATOM | 11725 | N   | GLU A 406 | 25.833 | 6.254  | -36.785 | 1.00 | 0.00 | C | N |
| ATOM | 11726 | CA  | GLU A 406 | 25.469 | 6.746  | -38.083 | 1.00 | 0.00 | C | C |
| ATOM | 11727 | CB  | GLU A 406 | 26.202 | 6.067  | -39.250 | 1.00 | 0.00 | C | C |
| ATOM | 11728 | CG  | GLU A 406 | 27.599 | 6.646  | -39.472 | 1.00 | 0.00 | C | C |
| ATOM | 11729 | CD  | GLU A 406 | 27.425 | 8.098  | -39.907 | 1.00 | 0.00 | C | C |
| ATOM | 11730 | OE1 | GLU A 406 | 26.254 | 8.527  | -40.088 | 1.00 | 0.00 | C | O |
| ATOM | 11731 | OE2 | GLU A 406 | 28.461 | 8.800  | -40.063 | 1.00 | 0.00 | C | O |
| ATOM | 11732 | C   | GLU A 406 | 23.998 | 6.593  | -38.292 | 1.00 | 0.00 | C | C |
| ATOM | 11733 | O   | GLU A 406 | 23.354 | 7.505  | -38.805 | 1.00 | 0.00 | C | O |
| ATOM | 11734 | N   | THR A 407 | 23.433 | 5.442  | -37.867 | 1.00 | 0.00 | C | N |
| ATOM | 11735 | CA  | THR A 407 | 22.051 | 5.046  | -38.023 | 1.00 | 0.00 | C | C |
| ATOM | 11736 | CB  | THR A 407 | 21.111 | 6.218  | -37.898 | 1.00 | 0.00 | C | C |
| ATOM | 11737 | OG1 | THR A 407 | 21.286 | 6.830  | -36.629 | 1.00 | 0.00 | C | O |
| ATOM | 11738 | CG2 | THR A 407 | 19.654 | 5.749  | -38.047 | 1.00 | 0.00 | C | C |
| ATOM | 11739 | C   | THR A 407 | 21.781 | 4.319  | -39.330 | 1.00 | 0.00 | C | C |
| ATOM | 11740 | O   | THR A 407 | 20.755 | 3.636  | -39.391 | 1.00 | 0.00 | C | O |
| ATOM | 11741 | N   | PRO A 408 | 22.565 | 4.384  | -40.382 | 1.00 | 0.00 | C | N |
| ATOM | 11742 | CD  | PRO A 408 | 22.870 | 5.706  | -40.910 | 1.00 | 0.00 | C | C |
| ATOM | 11743 | CA  | PRO A 408 | 22.339 | 3.477  | -41.489 | 1.00 | 0.00 | C | C |
| ATOM | 11744 | CB  | PRO A 408 | 22.830 | 4.174  | -42.756 | 1.00 | 0.00 | C | C |
| ATOM | 11745 | CG  | PRO A 408 | 22.689 | 5.657  | -42.429 | 1.00 | 0.00 | C | C |
| ATOM | 11746 | C   | PRO A 408 | 23.014 | 2.147  | -41.298 | 1.00 | 0.00 | C | C |
| ATOM | 11747 | O   | PRO A 408 | 22.997 | 1.344  | -42.231 | 1.00 | 0.00 | C | O |
| ATOM | 11748 | N   | ASN A 409 | 23.604 | 1.895  | -40.116 | 1.00 | 0.00 | C | N |
| ATOM | 11749 | CA  | ASN A 409 | 24.506 | 0.799  | -39.878 | 1.00 | 0.00 | C | C |
| ATOM | 11750 | CB  | ASN A 409 | 25.157 | 0.829  | -38.478 | 1.00 | 0.00 | C | C |
| ATOM | 11751 | CG  | ASN A 409 | 24.122 | 0.620  | -37.377 | 1.00 | 0.00 | C | C |
| ATOM | 11752 | OD1 | ASN A 409 | 23.386 | -0.365 | -37.340 | 1.00 | 0.00 | C | O |
| ATOM | 11753 | ND2 | ASN A 409 | 24.074 | 1.585  | -36.421 | 1.00 | 0.00 | C | N |
| ATOM | 11754 | C   | ASN A 409 | 23.951 | -0.578 | -40.089 | 1.00 | 0.00 | C | C |
| ATOM | 11755 | O   | ASN A 409 | 24.691 | -1.449 | -40.544 | 1.00 | 0.00 | C | O |
| ATOM | 11756 | N   | ARG A 410 | 22.657 | -0.815 | -39.810 | 1.00 | 0.00 | C | N |
| ATOM | 11757 | CA  | ARG A 410 | 22.093 | -2.138 | -39.821 | 1.00 | 0.00 | C | C |
| ATOM | 11758 | CB  | ARG A 410 | 20.575 | -2.048 | -39.606 | 1.00 | 0.00 | C | C |
| ATOM | 11759 | CG  | ARG A 410 | 20.273 | -1.253 | -38.330 | 1.00 | 0.00 | C | C |
| ATOM | 11760 | CD  | ARG A 410 | 18.848 | -0.704 | -38.211 | 1.00 | 0.00 | C | C |

|      |       |     |     |   |     |        |        |         |      |      |   |   |
|------|-------|-----|-----|---|-----|--------|--------|---------|------|------|---|---|
| ATOM | 11761 | NE  | ARG | A | 410 | 18.832 | 0.212  | -37.031 | 1.00 | 0.00 | C | N |
| ATOM | 11762 | CZ  | ARG | A | 410 | 18.187 | 1.416  | -37.099 | 1.00 | 0.00 | C | C |
| ATOM | 11763 | NH1 | ARG | A | 410 | 17.533 | 1.777  | -38.239 | 1.00 | 0.00 | C | N |
| ATOM | 11764 | NH2 | ARG | A | 410 | 18.197 | 2.259  | -36.023 | 1.00 | 0.00 | C | N |
| ATOM | 11765 | C   | ARG | A | 410 | 22.401 | -2.774 | -41.148 | 1.00 | 0.00 | C | C |
| ATOM | 11766 | O   | ARG | A | 410 | 22.767 | -3.948 | -41.211 | 1.00 | 0.00 | C | O |
| ATOM | 11767 | N   | HSD | A | 411 | 22.306 | -2.000 | -42.243 | 1.00 | 0.00 | C | N |
| ATOM | 11768 | CA  | HSD | A | 411 | 22.589 | -2.507 | -43.558 | 1.00 | 0.00 | C | C |
| ATOM | 11769 | CB  | HSD | A | 411 | 22.225 | -1.514 | -44.676 | 1.00 | 0.00 | C | C |
| ATOM | 11770 | ND1 | HSD | A | 411 | 20.127 | -0.161 | -44.197 | 1.00 | 0.00 | C | N |
| ATOM | 11771 | CG  | HSD | A | 411 | 20.753 | -1.250 | -44.761 | 1.00 | 0.00 | C | C |
| ATOM | 11772 | CE1 | HSD | A | 411 | 18.805 | -0.278 | -44.479 | 1.00 | 0.00 | C | C |
| ATOM | 11773 | NE2 | HSD | A | 411 | 18.537 | -1.364 | -45.185 | 1.00 | 0.00 | C | N |
| ATOM | 11774 | CD2 | HSD | A | 411 | 19.767 | -1.975 | -45.360 | 1.00 | 0.00 | C | C |
| ATOM | 11775 | C   | HSD | A | 411 | 24.043 | -2.862 | -43.733 | 1.00 | 0.00 | C | C |
| ATOM | 11776 | O   | HSD | A | 411 | 24.363 | -3.885 | -44.336 | 1.00 | 0.00 | C | O |
| ATOM | 11777 | N   | ASP | A | 412 | 24.971 | -2.029 | -43.222 | 1.00 | 0.00 | C | N |
| ATOM | 11778 | CA  | ASP | A | 412 | 26.384 | -2.217 | -43.444 | 1.00 | 0.00 | C | C |
| ATOM | 11779 | CB  | ASP | A | 412 | 27.217 | -1.095 | -42.795 | 1.00 | 0.00 | C | C |
| ATOM | 11780 | CG  | ASP | A | 412 | 26.878 | 0.235  | -43.452 | 1.00 | 0.00 | C | C |
| ATOM | 11781 | OD1 | ASP | A | 412 | 26.956 | 0.317  | -44.707 | 1.00 | 0.00 | C | O |
| ATOM | 11782 | OD2 | ASP | A | 412 | 26.527 | 1.186  | -42.703 | 1.00 | 0.00 | C | O |
| ATOM | 11783 | C   | ASP | A | 412 | 26.851 | -3.502 | -42.818 | 1.00 | 0.00 | C | C |
| ATOM | 11784 | O   | ASP | A | 412 | 27.609 | -4.260 | -43.420 | 1.00 | 0.00 | C | O |
| ATOM | 11785 | N   | MET | A | 413 | 26.409 | -3.777 | -41.577 | 1.00 | 0.00 | C | N |
| ATOM | 11786 | CA  | MET | A | 413 | 26.833 | -4.951 | -40.867 | 1.00 | 0.00 | C | C |
| ATOM | 11787 | CB  | MET | A | 413 | 26.280 | -5.027 | -39.435 | 1.00 | 0.00 | C | C |
| ATOM | 11788 | CG  | MET | A | 413 | 26.742 | -6.277 | -38.683 | 1.00 | 0.00 | C | C |
| ATOM | 11789 | SD  | MET | A | 413 | 28.513 | -6.284 | -38.274 | 1.00 | 0.00 | C | S |
| ATOM | 11790 | CE  | MET | A | 413 | 29.059 | -6.986 | -39.855 | 1.00 | 0.00 | C | C |
| ATOM | 11791 | C   | MET | A | 413 | 26.337 | -6.165 | -41.592 | 1.00 | 0.00 | C | C |
| ATOM | 11792 | O   | MET | A | 413 | 27.034 | -7.173 | -41.693 | 1.00 | 0.00 | C | O |
| ATOM | 11793 | N   | LEU | A | 414 | 25.117 | -6.073 | -42.140 | 1.00 | 0.00 | C | N |
| ATOM | 11794 | CA  | LEU | A | 414 | 24.442 | -7.158 | -42.792 | 1.00 | 0.00 | C | C |
| ATOM | 11795 | CB  | LEU | A | 414 | 23.028 | -6.794 | -43.263 | 1.00 | 0.00 | C | C |
| ATOM | 11796 | CG  | LEU | A | 414 | 22.405 | -7.908 | -44.115 | 1.00 | 0.00 | C | C |
| ATOM | 11797 | CD1 | LEU | A | 414 | 22.315 | -9.225 | -43.332 | 1.00 | 0.00 | C | C |
| ATOM | 11798 | CD2 | LEU | A | 414 | 21.066 | -7.458 | -44.717 | 1.00 | 0.00 | C | C |

|            |     |           |        |         |         |      |      |   |   |
|------------|-----|-----------|--------|---------|---------|------|------|---|---|
| ATOM 11799 | C   | LEU A 414 | 25.182 | -7.619  | -44.007 | 1.00 | 0.00 | C | C |
| ATOM 11800 | O   | LEU A 414 | 25.062 | -8.777  | -44.401 | 1.00 | 0.00 | C | O |
| ATOM 11801 | N   | LEU A 415 | 25.963 | -6.722  | -44.634 | 1.00 | 0.00 | C | N |
| ATOM 11802 | CA  | LEU A 415 | 26.585 | -6.982  | -45.902 | 1.00 | 0.00 | C | C |
| ATOM 11803 | CB  | LEU A 415 | 27.584 | -5.878  | -46.300 | 1.00 | 0.00 | C | C |
| ATOM 11804 | CG  | LEU A 415 | 28.252 | -6.100  | -47.667 | 1.00 | 0.00 | C | C |
| ATOM 11805 | CD1 | LEU A 415 | 27.207 | -6.101  | -48.793 | 1.00 | 0.00 | C | C |
| ATOM 11806 | CD2 | LEU A 415 | 29.376 | -5.083  | -47.918 | 1.00 | 0.00 | C | C |
| ATOM 11807 | C   | LEU A 415 | 27.298 | -8.302  | -45.905 | 1.00 | 0.00 | C | C |
| ATOM 11808 | O   | LEU A 415 | 27.961 | -8.689  | -44.943 | 1.00 | 0.00 | C | O |
| ATOM 11809 | N   | VAL A 416 | 27.148 | -9.045  | -47.023 | 1.00 | 0.00 | C | N |
| ATOM 11810 | CA  | VAL A 416 | 27.713 | -10.355 | -47.172 | 1.00 | 0.00 | C | C |
| ATOM 11811 | CB  | VAL A 416 | 26.665 | -11.434 | -47.107 | 1.00 | 0.00 | C | C |
| ATOM 11812 | CG1 | VAL A 416 | 25.960 | -11.350 | -45.743 | 1.00 | 0.00 | C | C |
| ATOM 11813 | CG2 | VAL A 416 | 25.712 | -11.279 | -48.305 | 1.00 | 0.00 | C | C |
| ATOM 11814 | C   | VAL A 416 | 28.324 | -10.421 | -48.539 | 1.00 | 0.00 | C | C |
| ATOM 11815 | O   | VAL A 416 | 28.183 | -9.495  | -49.334 | 1.00 | 0.00 | C | O |
| ATOM 11816 | N   | GLU A 417 | 29.023 | -11.524 | -48.862 | 1.00 | 0.00 | C | N |
| ATOM 11817 | CA  | GLU A 417 | 29.226 | -12.609 | -47.953 | 1.00 | 0.00 | C | C |
| ATOM 11818 | CB  | GLU A 417 | 29.756 | -13.892 | -48.600 | 1.00 | 0.00 | C | C |
| ATOM 11819 | CG  | GLU A 417 | 29.774 | -15.085 | -47.639 | 1.00 | 0.00 | C | C |
| ATOM 11820 | CD  | GLU A 417 | 28.326 | -15.442 | -47.315 | 1.00 | 0.00 | C | C |
| ATOM 11821 | OE1 | GLU A 417 | 27.681 | -14.663 | -46.566 | 1.00 | 0.00 | C | O |
| ATOM 11822 | OE2 | GLU A 417 | 27.847 | -16.495 | -47.814 | 1.00 | 0.00 | C | O |
| ATOM 11823 | C   | GLU A 417 | 30.196 | -12.257 | -46.881 | 1.00 | 0.00 | C | C |
| ATOM 11824 | O   | GLU A 417 | 29.941 | -12.632 | -45.750 | 1.00 | 0.00 | C | O |
| ATOM 11825 | N   | PRO A 418 | 31.273 | -11.559 | -47.105 | 1.00 | 0.00 | C | N |
| ATOM 11826 | CD  | PRO A 418 | 31.886 | -11.466 | -48.421 | 1.00 | 0.00 | C | C |
| ATOM 11827 | CA  | PRO A 418 | 32.256 | -11.449 | -46.060 | 1.00 | 0.00 | C | C |
| ATOM 11828 | CB  | PRO A 418 | 33.471 | -10.783 | -46.698 | 1.00 | 0.00 | C | C |
| ATOM 11829 | CG  | PRO A 418 | 33.387 | -11.238 | -48.164 | 1.00 | 0.00 | C | C |
| ATOM 11830 | C   | PRO A 418 | 31.879 | -10.840 | -44.757 | 1.00 | 0.00 | C | C |
| ATOM 11831 | O   | PRO A 418 | 32.333 | -11.352 | -43.743 | 1.00 | 0.00 | C | O |
| ATOM 11832 | N   | LEU A 419 | 31.086 | -9.770  | -44.694 | 1.00 | 0.00 | C | N |
| ATOM 11833 | CA  | LEU A 419 | 30.882 | -9.240  | -43.376 | 1.00 | 0.00 | C | C |
| ATOM 11834 | CB  | LEU A 419 | 30.082 | -7.927  | -43.391 | 1.00 | 0.00 | C | C |
| ATOM 11835 | CG  | LEU A 419 | 30.747 | -6.822  | -44.235 | 1.00 | 0.00 | C | C |
| ATOM 11836 | CD1 | LEU A 419 | 29.949 | -5.511  | -44.165 | 1.00 | 0.00 | C | C |

|            |               |        |         |         |      |      |   |   |
|------------|---------------|--------|---------|---------|------|------|---|---|
| ATOM 11837 | CD2 LEU A 419 | 32.230 | -6.644  | -43.872 | 1.00 | 0.00 | C | C |
| ATOM 11838 | C LEU A 419   | 30.136 | -10.253 | -42.559 | 1.00 | 0.00 | C | C |
| ATOM 11839 | O LEU A 419   | 30.520 | -10.557 | -41.430 | 1.00 | 0.00 | C | O |
| ATOM 11840 | N ASN A 420   | 29.054 | -10.820 | -43.117 | 1.00 | 0.00 | C | N |
| ATOM 11841 | CA ASN A 420  | 28.301 | -11.814 | -42.400 | 1.00 | 0.00 | C | C |
| ATOM 11842 | CB ASN A 420  | 26.977 | -12.171 | -43.100 | 1.00 | 0.00 | C | C |
| ATOM 11843 | CG ASN A 420  | 26.243 | -13.233 | -42.280 | 1.00 | 0.00 | C | C |
| ATOM 11844 | OD1 ASN A 420 | 26.680 | -14.374 | -42.192 | 1.00 | 0.00 | C | O |
| ATOM 11845 | ND2 ASN A 420 | 25.088 | -12.841 | -41.671 | 1.00 | 0.00 | C | N |
| ATOM 11846 | C ASN A 420   | 29.093 | -13.080 | -42.265 | 1.00 | 0.00 | C | C |
| ATOM 11847 | O ASN A 420   | 29.189 | -13.661 | -41.187 | 1.00 | 0.00 | C | O |
| ATOM 11848 | N ARG A 421   | 29.692 | -13.527 | -43.378 | 1.00 | 0.00 | C | N |
| ATOM 11849 | CA ARG A 421  | 30.405 | -14.764 | -43.509 | 1.00 | 0.00 | C | C |
| ATOM 11850 | CB ARG A 421  | 30.945 | -15.044 | -44.923 | 1.00 | 0.00 | C | C |
| ATOM 11851 | CG ARG A 421  | 31.727 | -16.361 | -44.972 | 1.00 | 0.00 | C | C |
| ATOM 11852 | CD ARG A 421  | 32.912 | -16.364 | -45.941 | 1.00 | 0.00 | C | C |
| ATOM 11853 | NE ARG A 421  | 32.387 | -16.422 | -47.330 | 1.00 | 0.00 | C | N |
| ATOM 11854 | CZ ARG A 421  | 33.257 | -16.650 | -48.358 | 1.00 | 0.00 | C | C |
| ATOM 11855 | NH1 ARG A 421 | 34.591 | -16.779 | -48.100 | 1.00 | 0.00 | C | N |
| ATOM 11856 | NH2 ARG A 421 | 32.794 | -16.749 | -49.640 | 1.00 | 0.00 | C | N |
| ATOM 11857 | C ARG A 421   | 31.614 | -14.772 | -42.636 | 1.00 | 0.00 | C | C |
| ATOM 11858 | O ARG A 421   | 31.889 | -15.754 | -41.952 | 1.00 | 0.00 | C | O |
| ATOM 11859 | N LEU A 422   | 32.366 | -13.664 | -42.636 | 1.00 | 0.00 | C | N |
| ATOM 11860 | CA LEU A 422  | 33.620 | -13.584 | -41.946 | 1.00 | 0.00 | C | C |
| ATOM 11861 | CB LEU A 422  | 34.372 | -12.249 | -42.175 | 1.00 | 0.00 | C | C |
| ATOM 11862 | CG LEU A 422  | 35.816 | -12.140 | -41.628 | 1.00 | 0.00 | C | C |
| ATOM 11863 | CD1 LEU A 422 | 36.459 | -10.809 | -42.051 | 1.00 | 0.00 | C | C |
| ATOM 11864 | CD2 LEU A 422 | 35.895 | -12.315 | -40.108 | 1.00 | 0.00 | C | C |
| ATOM 11865 | C LEU A 422   | 33.374 | -13.754 | -40.483 | 1.00 | 0.00 | C | C |
| ATOM 11866 | O LEU A 422   | 34.113 | -14.473 | -39.812 | 1.00 | 0.00 | C | O |
| ATOM 11867 | N LEU A 423   | 32.327 | -13.106 | -39.945 | 1.00 | 0.00 | C | N |
| ATOM 11868 | CA LEU A 423  | 32.097 | -13.188 | -38.530 | 1.00 | 0.00 | C | C |
| ATOM 11869 | CB LEU A 423  | 30.979 | -12.259 | -38.029 | 1.00 | 0.00 | C | C |
| ATOM 11870 | CG LEU A 423  | 31.431 | -10.793 | -37.874 | 1.00 | 0.00 | C | C |
| ATOM 11871 | CD1 LEU A 423 | 32.403 | -10.643 | -36.694 | 1.00 | 0.00 | C | C |
| ATOM 11872 | CD2 LEU A 423 | 32.031 | -10.236 | -39.171 | 1.00 | 0.00 | C | C |
| ATOM 11873 | C LEU A 423   | 31.787 | -14.593 | -38.113 | 1.00 | 0.00 | C | C |
| ATOM 11874 | O LEU A 423   | 32.244 | -15.048 | -37.066 | 1.00 | 0.00 | C | O |

|            |     |           |        |         |         |      |      |   |   |
|------------|-----|-----------|--------|---------|---------|------|------|---|---|
| ATOM 11875 | N   | GLN A 424 | 31.007 | -15.325 | -38.923 | 1.00 | 0.00 | C | N |
| ATOM 11876 | CA  | GLN A 424 | 30.628 | -16.657 | -38.547 | 1.00 | 0.00 | C | C |
| ATOM 11877 | CB  | GLN A 424 | 29.703 | -17.307 | -39.593 | 1.00 | 0.00 | C | C |
| ATOM 11878 | CG  | GLN A 424 | 29.224 | -18.710 | -39.219 | 1.00 | 0.00 | C | C |
| ATOM 11879 | CD  | GLN A 424 | 28.264 | -18.562 | -38.052 | 1.00 | 0.00 | C | C |
| ATOM 11880 | OE1 | GLN A 424 | 28.346 | -17.598 | -37.291 | 1.00 | 0.00 | C | O |
| ATOM 11881 | NE2 | GLN A 424 | 27.324 | -19.536 | -37.905 | 1.00 | 0.00 | C | N |
| ATOM 11882 | C   | GLN A 424 | 31.863 | -17.492 | -38.440 | 1.00 | 0.00 | C | C |
| ATOM 11883 | O   | GLN A 424 | 32.023 | -18.277 | -37.506 | 1.00 | 0.00 | C | O |
| ATOM 11884 | N   | ASP A 425 | 32.783 | -17.319 | -39.402 | 1.00 | 0.00 | C | N |
| ATOM 11885 | CA  | ASP A 425 | 33.975 | -18.110 | -39.445 | 1.00 | 0.00 | C | C |
| ATOM 11886 | CB  | ASP A 425 | 34.817 | -17.788 | -40.691 | 1.00 | 0.00 | C | C |
| ATOM 11887 | CG  | ASP A 425 | 35.767 | -18.944 | -40.962 | 1.00 | 0.00 | C | C |
| ATOM 11888 | OD1 | ASP A 425 | 36.354 | -19.479 | -39.987 | 1.00 | 0.00 | C | O |
| ATOM 11889 | OD2 | ASP A 425 | 35.917 | -19.304 | -42.161 | 1.00 | 0.00 | C | O |
| ATOM 11890 | C   | ASP A 425 | 34.797 | -17.824 | -38.227 | 1.00 | 0.00 | C | C |
| ATOM 11891 | O   | ASP A 425 | 35.334 | -18.741 | -37.605 | 1.00 | 0.00 | C | O |
| ATOM 11892 | N   | LYS A 426 | 34.926 | -16.538 | -37.851 | 1.00 | 0.00 | C | N |
| ATOM 11893 | CA  | LYS A 426 | 35.747 | -16.212 | -36.720 | 1.00 | 0.00 | C | C |
| ATOM 11894 | CB  | LYS A 426 | 35.985 | -14.703 | -36.539 | 1.00 | 0.00 | C | C |
| ATOM 11895 | CG  | LYS A 426 | 37.000 | -14.123 | -37.527 | 1.00 | 0.00 | C | C |
| ATOM 11896 | CD  | LYS A 426 | 37.112 | -12.600 | -37.443 | 1.00 | 0.00 | C | C |
| ATOM 11897 | CE  | LYS A 426 | 38.219 | -12.012 | -38.320 | 1.00 | 0.00 | C | C |
| ATOM 11898 | NZ  | LYS A 426 | 38.037 | -10.547 | -38.439 | 1.00 | 0.00 | C | N |
| ATOM 11899 | C   | LYS A 426 | 35.173 | -16.728 | -35.429 | 1.00 | 0.00 | C | C |
| ATOM 11900 | O   | LYS A 426 | 35.898 | -17.288 | -34.609 | 1.00 | 0.00 | C | O |
| ATOM 11901 | N   | TRP A 427 | 33.868 | -16.499 | -35.195 | 1.00 | 0.00 | C | N |
| ATOM 11902 | CA  | TRP A 427 | 33.222 | -16.835 | -33.951 | 1.00 | 0.00 | C | C |
| ATOM 11903 | CB  | TRP A 427 | 31.887 | -16.065 | -33.781 | 1.00 | 0.00 | C | C |
| ATOM 11904 | CG  | TRP A 427 | 31.287 | -16.078 | -32.389 | 1.00 | 0.00 | C | C |
| ATOM 11905 | CD1 | TRP A 427 | 31.781 | -15.474 | -31.276 | 1.00 | 0.00 | C | C |
| ATOM 11906 | NE1 | TRP A 427 | 30.953 | -15.688 | -30.204 | 1.00 | 0.00 | C | N |
| ATOM 11907 | CE2 | TRP A 427 | 29.876 | -16.427 | -30.628 | 1.00 | 0.00 | C | C |
| ATOM 11908 | CD2 | TRP A 427 | 30.044 | -16.687 | -31.991 | 1.00 | 0.00 | C | C |
| ATOM 11909 | CE3 | TRP A 427 | 29.117 | -17.396 | -32.695 | 1.00 | 0.00 | C | C |
| ATOM 11910 | CZ3 | TRP A 427 | 28.014 | -17.852 | -32.005 | 1.00 | 0.00 | C | C |
| ATOM 11911 | CZ2 | TRP A 427 | 28.778 | -16.876 | -29.949 | 1.00 | 0.00 | C | C |
| ATOM 11912 | CH2 | TRP A 427 | 27.848 | -17.601 | -30.658 | 1.00 | 0.00 | C | C |

|      |       |     |           |        |         |         |      |      |   |   |
|------|-------|-----|-----------|--------|---------|---------|------|------|---|---|
| ATOM | 11913 | C   | TRP A 427 | 32.950 | -18.295 | -33.794 | 1.00 | 0.00 | C | C |
| ATOM | 11914 | O   | TRP A 427 | 33.269 | -18.883 | -32.763 | 1.00 | 0.00 | C | O |
| ATOM | 11915 | N   | ASP A 428 | 32.374 | -18.920 | -34.836 | 1.00 | 0.00 | C | N |
| ATOM | 11916 | CA  | ASP A 428 | 31.917 | -20.268 | -34.714 | 1.00 | 0.00 | C | C |
| ATOM | 11917 | CB  | ASP A 428 | 31.353 | -20.813 | -36.038 | 1.00 | 0.00 | C | C |
| ATOM | 11918 | CG  | ASP A 428 | 30.752 | -22.197 | -35.817 | 1.00 | 0.00 | C | C |
| ATOM | 11919 | OD1 | ASP A 428 | 30.891 | -22.748 | -34.690 | 1.00 | 0.00 | C | O |
| ATOM | 11920 | OD2 | ASP A 428 | 30.133 | -22.721 | -36.781 | 1.00 | 0.00 | C | O |
| ATOM | 11921 | C   | ASP A 428 | 33.066 | -21.119 | -34.332 | 1.00 | 0.00 | C | C |
| ATOM | 11922 | O   | ASP A 428 | 32.958 | -21.925 | -33.410 | 1.00 | 0.00 | C | O |
| ATOM | 11923 | N   | ARG A 429 | 34.202 | -20.988 | -35.031 | 1.00 | 0.00 | C | N |
| ATOM | 11924 | CA  | ARG A 429 | 35.202 | -21.899 | -34.605 | 1.00 | 0.00 | C | C |
| ATOM | 11925 | CB  | ARG A 429 | 36.412 | -21.979 | -35.551 | 1.00 | 0.00 | C | C |
| ATOM | 11926 | CG  | ARG A 429 | 37.122 | -20.652 | -35.806 | 1.00 | 0.00 | C | C |
| ATOM | 11927 | CD  | ARG A 429 | 38.319 | -20.792 | -36.750 | 1.00 | 0.00 | C | C |
| ATOM | 11928 | NE  | ARG A 429 | 37.810 | -21.377 | -38.022 | 1.00 | 0.00 | C | N |
| ATOM | 11929 | CZ  | ARG A 429 | 38.644 | -22.102 | -38.825 | 1.00 | 0.00 | C | C |
| ATOM | 11930 | NH1 | ARG A 429 | 39.939 | -22.318 | -38.452 | 1.00 | 0.00 | C | N |
| ATOM | 11931 | NH2 | ARG A 429 | 38.174 | -22.617 | -39.999 | 1.00 | 0.00 | C | N |
| ATOM | 11932 | C   | ARG A 429 | 35.677 | -21.611 | -33.207 | 1.00 | 0.00 | C | C |
| ATOM | 11933 | O   | ARG A 429 | 35.484 | -22.440 | -32.321 | 1.00 | 0.00 | C | O |
| ATOM | 11934 | N   | PHE A 430 | 36.367 | -20.465 | -32.993 | 1.00 | 0.00 | C | N |
| ATOM | 11935 | CA  | PHE A 430 | 36.917 | -20.096 | -31.708 | 1.00 | 0.00 | C | C |
| ATOM | 11936 | CB  | PHE A 430 | 38.385 | -19.639 | -31.824 | 1.00 | 0.00 | C | C |
| ATOM | 11937 | CG  | PHE A 430 | 38.466 | -18.586 | -32.875 | 1.00 | 0.00 | C | C |
| ATOM | 11938 | CD1 | PHE A 430 | 38.177 | -17.277 | -32.587 | 1.00 | 0.00 | C | C |
| ATOM | 11939 | CE1 | PHE A 430 | 38.252 | -16.321 | -33.571 | 1.00 | 0.00 | C | C |
| ATOM | 11940 | CZ  | PHE A 430 | 38.618 | -16.656 | -34.851 | 1.00 | 0.00 | C | C |
| ATOM | 11941 | CD2 | PHE A 430 | 38.831 | -18.913 | -34.160 | 1.00 | 0.00 | C | C |
| ATOM | 11942 | CE2 | PHE A 430 | 38.906 | -17.964 | -35.151 | 1.00 | 0.00 | C | C |
| ATOM | 11943 | C   | PHE A 430 | 36.200 | -19.121 | -30.793 | 1.00 | 0.00 | C | C |
| ATOM | 11944 | O   | PHE A 430 | 36.168 | -19.323 | -29.579 | 1.00 | 0.00 | C | O |
| ATOM | 11945 | N   | VAL A 431 | 35.604 | -18.044 | -31.346 | 1.00 | 0.00 | C | N |
| ATOM | 11946 | CA  | VAL A 431 | 35.263 | -16.869 | -30.569 | 1.00 | 0.00 | C | C |
| ATOM | 11947 | CB  | VAL A 431 | 34.708 | -15.739 | -31.378 | 1.00 | 0.00 | C | C |
| ATOM | 11948 | CG1 | VAL A 431 | 34.437 | -14.565 | -30.419 | 1.00 | 0.00 | C | C |
| ATOM | 11949 | CG2 | VAL A 431 | 35.653 | -15.416 | -32.538 | 1.00 | 0.00 | C | C |
| ATOM | 11950 | C   | VAL A 431 | 34.271 | -17.098 | -29.477 | 1.00 | 0.00 | C | C |

|      |       |     |           |        |         |         |      |      |   |   |
|------|-------|-----|-----------|--------|---------|---------|------|------|---|---|
| ATOM | 11951 | O   | VAL A 431 | 34.413 | -16.551 | -28.385 | 1.00 | 0.00 | C | O |
| ATOM | 11952 | N   | LYS A 432 | 33.224 | -17.894 | -29.729 | 1.00 | 0.00 | C | N |
| ATOM | 11953 | CA  | LYS A 432 | 32.196 | -18.046 | -28.749 | 1.00 | 0.00 | C | C |
| ATOM | 11954 | CB  | LYS A 432 | 31.100 | -19.024 | -29.199 | 1.00 | 0.00 | C | C |
| ATOM | 11955 | CG  | LYS A 432 | 31.634 | -20.424 | -29.504 | 1.00 | 0.00 | C | C |
| ATOM | 11956 | CD  | LYS A 432 | 30.538 | -21.467 | -29.731 | 1.00 | 0.00 | C | C |
| ATOM | 11957 | CE  | LYS A 432 | 31.078 | -22.839 | -30.138 | 1.00 | 0.00 | C | C |
| ATOM | 11958 | NZ  | LYS A 432 | 29.954 | -23.772 | -30.372 | 1.00 | 0.00 | C | N |
| ATOM | 11959 | C   | LYS A 432 | 32.799 | -18.572 | -27.490 | 1.00 | 0.00 | C | C |
| ATOM | 11960 | O   | LYS A 432 | 32.439 | -18.142 | -26.394 | 1.00 | 0.00 | C | O |
| ATOM | 11961 | N   | ARG A 433 | 33.751 | -19.507 | -27.613 | 1.00 | 0.00 | C | N |
| ATOM | 11962 | CA  | ARG A 433 | 34.347 | -20.116 | -26.463 | 1.00 | 0.00 | C | C |
| ATOM | 11963 | CB  | ARG A 433 | 35.318 | -21.247 | -26.834 | 1.00 | 0.00 | C | C |
| ATOM | 11964 | CG  | ARG A 433 | 35.764 | -22.078 | -25.629 | 1.00 | 0.00 | C | C |
| ATOM | 11965 | CD  | ARG A 433 | 36.319 | -23.451 | -26.011 | 1.00 | 0.00 | C | C |
| ATOM | 11966 | NE  | ARG A 433 | 35.231 | -24.168 | -26.738 | 1.00 | 0.00 | C | N |
| ATOM | 11967 | CZ  | ARG A 433 | 34.278 | -24.854 | -26.041 | 1.00 | 0.00 | C | C |
| ATOM | 11968 | NH1 | ARG A 433 | 34.357 | -24.945 | -24.683 | 1.00 | 0.00 | C | N |
| ATOM | 11969 | NH2 | ARG A 433 | 33.240 | -25.439 | -26.708 | 1.00 | 0.00 | C | N |
| ATOM | 11970 | C   | ARG A 433 | 35.089 | -19.098 | -25.648 | 1.00 | 0.00 | C | C |
| ATOM | 11971 | O   | ARG A 433 | 35.027 | -19.129 | -24.420 | 1.00 | 0.00 | C | O |
| ATOM | 11972 | N   | ILE A 434 | 35.803 | -18.158 | -26.305 | 1.00 | 0.00 | C | N |
| ATOM | 11973 | CA  | ILE A 434 | 36.633 | -17.211 | -25.607 | 1.00 | 0.00 | C | C |
| ATOM | 11974 | CB  | ILE A 434 | 37.456 | -16.330 | -26.509 | 1.00 | 0.00 | C | C |
| ATOM | 11975 | CG2 | ILE A 434 | 38.245 | -17.266 | -27.433 | 1.00 | 0.00 | C | C |
| ATOM | 11976 | CG1 | ILE A 434 | 36.601 | -15.329 | -27.297 | 1.00 | 0.00 | C | C |
| ATOM | 11977 | CD  | ILE A 434 | 37.423 | -14.247 | -27.998 | 1.00 | 0.00 | C | C |
| ATOM | 11978 | C   | ILE A 434 | 35.796 | -16.305 | -24.757 | 1.00 | 0.00 | C | C |
| ATOM | 11979 | O   | ILE A 434 | 36.165 | -15.978 | -23.632 | 1.00 | 0.00 | C | O |
| ATOM | 11980 | N   | PHE A 435 | 34.645 | -15.869 | -25.291 | 1.00 | 0.00 | C | N |
| ATOM | 11981 | CA  | PHE A 435 | 33.771 | -14.920 | -24.664 | 1.00 | 0.00 | C | C |
| ATOM | 11982 | CB  | PHE A 435 | 32.649 | -14.544 | -25.644 | 1.00 | 0.00 | C | C |
| ATOM | 11983 | CG  | PHE A 435 | 31.817 | -13.468 | -25.062 | 1.00 | 0.00 | C | C |
| ATOM | 11984 | CD1 | PHE A 435 | 32.377 | -12.271 | -24.678 | 1.00 | 0.00 | C | C |
| ATOM | 11985 | CE1 | PHE A 435 | 31.595 | -11.270 | -24.151 | 1.00 | 0.00 | C | C |
| ATOM | 11986 | CZ  | PHE A 435 | 30.242 | -11.463 | -24.030 | 1.00 | 0.00 | C | C |
| ATOM | 11987 | CD2 | PHE A 435 | 30.463 | -13.649 | -24.961 | 1.00 | 0.00 | C | C |
| ATOM | 11988 | CE2 | PHE A 435 | 29.684 | -12.651 | -24.442 | 1.00 | 0.00 | C | C |



|      |       |     |           |        |         |         |      |      |   |   |
|------|-------|-----|-----------|--------|---------|---------|------|------|---|---|
| ATOM | 11989 | C   | PHE A 435 | 33.211 | -15.463 | -23.379 | 1.00 | 0.00 | C | C |
| ATOM | 11990 | O   | PHE A 435 | 33.160 | -14.753 | -22.373 | 1.00 | 0.00 | C | O |
| ATOM | 11991 | N   | TYR A 436 | 32.792 | -16.741 | -23.366 | 1.00 | 0.00 | C | N |
| ATOM | 11992 | CA  | TYR A 436 | 32.218 | -17.335 | -22.189 | 1.00 | 0.00 | C | C |
| ATOM | 11993 | CB  | TYR A 436 | 31.796 | -18.801 | -22.384 | 1.00 | 0.00 | C | C |
| ATOM | 11994 | CG  | TYR A 436 | 30.550 | -18.837 | -23.194 | 1.00 | 0.00 | C | C |
| ATOM | 11995 | CD1 | TYR A 436 | 29.329 | -18.698 | -22.573 | 1.00 | 0.00 | C | C |
| ATOM | 11996 | CE1 | TYR A 436 | 28.164 | -18.734 | -23.295 | 1.00 | 0.00 | C | C |
| ATOM | 11997 | CZ  | TYR A 436 | 28.216 | -18.911 | -24.656 | 1.00 | 0.00 | C | C |
| ATOM | 11998 | OH  | TYR A 436 | 27.023 | -18.954 | -25.404 | 1.00 | 0.00 | C | O |
| ATOM | 11999 | CD2 | TYR A 436 | 30.594 | -19.009 | -24.557 | 1.00 | 0.00 | C | C |
| ATOM | 12000 | CE2 | TYR A 436 | 29.429 | -19.046 | -25.288 | 1.00 | 0.00 | C | C |
| ATOM | 12001 | C   | TYR A 436 | 33.225 | -17.321 | -21.085 | 1.00 | 0.00 | C | C |
| ATOM | 12002 | O   | TYR A 436 | 32.885 | -17.053 | -19.934 | 1.00 | 0.00 | C | O |
| ATOM | 12003 | N   | PHE A 437 | 34.497 | -17.613 | -21.409 | 1.00 | 0.00 | C | N |
| ATOM | 12004 | CA  | PHE A 437 | 35.512 | -17.645 | -20.400 | 1.00 | 0.00 | C | C |
| ATOM | 12005 | CB  | PHE A 437 | 36.908 | -17.993 | -20.953 | 1.00 | 0.00 | C | C |
| ATOM | 12006 | CG  | PHE A 437 | 37.887 | -17.933 | -19.828 | 1.00 | 0.00 | C | C |
| ATOM | 12007 | CD1 | PHE A 437 | 38.062 | -19.005 | -18.983 | 1.00 | 0.00 | C | C |
| ATOM | 12008 | CE1 | PHE A 437 | 38.964 | -18.942 | -17.947 | 1.00 | 0.00 | C | C |
| ATOM | 12009 | CZ  | PHE A 437 | 39.703 | -17.803 | -17.742 | 1.00 | 0.00 | C | C |
| ATOM | 12010 | CD2 | PHE A 437 | 38.626 | -16.793 | -19.610 | 1.00 | 0.00 | C | C |
| ATOM | 12011 | CE2 | PHE A 437 | 39.534 | -16.725 | -18.577 | 1.00 | 0.00 | C | C |
| ATOM | 12012 | C   | PHE A 437 | 35.580 | -16.289 | -19.781 | 1.00 | 0.00 | C | C |
| ATOM | 12013 | O   | PHE A 437 | 35.682 | -16.163 | -18.562 | 1.00 | 0.00 | C | O |
| ATOM | 12014 | N   | ASN A 438 | 35.506 | -15.233 | -20.609 | 1.00 | 0.00 | C | N |
| ATOM | 12015 | CA  | ASN A 438 | 35.599 | -13.901 | -20.088 | 1.00 | 0.00 | C | C |
| ATOM | 12016 | CB  | ASN A 438 | 35.458 | -12.826 | -21.182 | 1.00 | 0.00 | C | C |
| ATOM | 12017 | CG  | ASN A 438 | 36.615 | -12.969 | -22.158 | 1.00 | 0.00 | C | C |
| ATOM | 12018 | OD1 | ASN A 438 | 37.645 | -13.557 | -21.836 | 1.00 | 0.00 | C | O |
| ATOM | 12019 | ND2 | ASN A 438 | 36.444 | -12.415 | -23.390 | 1.00 | 0.00 | C | N |
| ATOM | 12020 | C   | ASN A 438 | 34.468 | -13.690 | -19.128 | 1.00 | 0.00 | C | C |
| ATOM | 12021 | O   | ASN A 438 | 34.664 | -13.172 | -18.031 | 1.00 | 0.00 | C | O |
| ATOM | 12022 | N   | PHE A 439 | 33.248 | -14.106 | -19.519 | 1.00 | 0.00 | C | N |
| ATOM | 12023 | CA  | PHE A 439 | 32.077 | -13.897 | -18.712 | 1.00 | 0.00 | C | C |
| ATOM | 12024 | CB  | PHE A 439 | 30.785 | -14.365 | -19.413 | 1.00 | 0.00 | C | C |
| ATOM | 12025 | CG  | PHE A 439 | 29.659 | -14.398 | -18.430 | 1.00 | 0.00 | C | C |
| ATOM | 12026 | CD1 | PHE A 439 | 29.196 | -13.249 | -17.831 | 1.00 | 0.00 | C | C |

|      |       |               |        |         |         |      |      |   |   |
|------|-------|---------------|--------|---------|---------|------|------|---|---|
| ATOM | 12027 | CE1 PHE A 439 | 28.153 | -13.296 | -16.936 | 1.00 | 0.00 | C | C |
| ATOM | 12028 | CZ PHE A 439  | 27.550 | -14.492 | -16.637 | 1.00 | 0.00 | C | C |
| ATOM | 12029 | CD2 PHE A 439 | 29.038 | -15.590 | -18.135 | 1.00 | 0.00 | C | C |
| ATOM | 12030 | CE2 PHE A 439 | 27.993 | -15.642 | -17.241 | 1.00 | 0.00 | C | C |
| ATOM | 12031 | C PHE A 439   | 32.196 | -14.616 | -17.408 | 1.00 | 0.00 | C | C |
| ATOM | 12032 | O PHE A 439   | 31.922 | -14.047 | -16.353 | 1.00 | 0.00 | C | O |
| ATOM | 12033 | N LEU A 440   | 32.622 | -15.891 | -17.438 | 1.00 | 0.00 | C | N |
| ATOM | 12034 | CA LEU A 440  | 32.686 | -16.649 | -16.224 | 1.00 | 0.00 | C | C |
| ATOM | 12035 | CB LEU A 440  | 33.077 | -18.122 | -16.443 | 1.00 | 0.00 | C | C |
| ATOM | 12036 | CG LEU A 440  | 32.028 | -18.910 | -17.250 | 1.00 | 0.00 | C | C |
| ATOM | 12037 | CD1 LEU A 440 | 32.417 | -20.390 | -17.386 | 1.00 | 0.00 | C | C |
| ATOM | 12038 | CD2 LEU A 440 | 30.618 | -18.710 | -16.670 | 1.00 | 0.00 | C | C |
| ATOM | 12039 | C LEU A 440   | 33.688 | -16.036 | -15.299 | 1.00 | 0.00 | C | C |
| ATOM | 12040 | O LEU A 440   | 33.431 | -15.906 | -14.104 | 1.00 | 0.00 | C | O |
| ATOM | 12041 | N VAL A 441   | 34.849 | -15.615 | -15.834 | 1.00 | 0.00 | C | N |
| ATOM | 12042 | CA VAL A 441  | 35.887 | -15.074 | -14.999 | 1.00 | 0.00 | C | C |
| ATOM | 12043 | CB VAL A 441  | 37.112 | -14.671 | -15.759 | 1.00 | 0.00 | C | C |
| ATOM | 12044 | CG1 VAL A 441 | 38.095 | -13.993 | -14.789 | 1.00 | 0.00 | C | C |
| ATOM | 12045 | CG2 VAL A 441 | 37.686 | -15.924 | -16.430 | 1.00 | 0.00 | C | C |
| ATOM | 12046 | C VAL A 441   | 35.372 | -13.848 | -14.316 | 1.00 | 0.00 | C | C |
| ATOM | 12047 | O VAL A 441   | 35.653 | -13.615 | -13.142 | 1.00 | 0.00 | C | O |
| ATOM | 12048 | N TYR A 442   | 34.594 | -13.034 | -15.049 | 1.00 | 0.00 | C | N |
| ATOM | 12049 | CA TYR A 442  | 34.060 | -11.803 | -14.546 | 1.00 | 0.00 | C | C |
| ATOM | 12050 | CB TYR A 442  | 33.255 | -11.065 | -15.630 | 1.00 | 0.00 | C | C |
| ATOM | 12051 | CG TYR A 442  | 32.691 | -9.808  | -15.062 | 1.00 | 0.00 | C | C |
| ATOM | 12052 | CD1 TYR A 442 | 33.420 | -8.641  | -15.082 | 1.00 | 0.00 | C | C |
| ATOM | 12053 | CE1 TYR A 442 | 32.901 | -7.479  | -14.564 | 1.00 | 0.00 | C | C |
| ATOM | 12054 | CZ TYR A 442  | 31.641 | -7.478  | -14.019 | 1.00 | 0.00 | C | C |
| ATOM | 12055 | OH TYR A 442  | 31.099 | -6.289  | -13.484 | 1.00 | 0.00 | C | O |
| ATOM | 12056 | CD2 TYR A 442 | 31.432 | -9.798  | -14.507 | 1.00 | 0.00 | C | C |
| ATOM | 12057 | CE2 TYR A 442 | 30.908 | -8.640  | -13.986 | 1.00 | 0.00 | C | C |
| ATOM | 12058 | C TYR A 442   | 33.151 | -12.091 | -13.392 | 1.00 | 0.00 | C | C |
| ATOM | 12059 | O TYR A 442   | 33.178 | -11.384 | -12.385 | 1.00 | 0.00 | C | O |
| ATOM | 12060 | N CYS A 443   | 32.340 | -13.157 | -13.498 | 1.00 | 0.00 | C | N |
| ATOM | 12061 | CA CYS A 443  | 31.362 | -13.467 | -12.494 | 1.00 | 0.00 | C | C |
| ATOM | 12062 | CB CYS A 443  | 30.568 | -14.740 | -12.822 | 1.00 | 0.00 | C | C |
| ATOM | 12063 | SG CYS A 443  | 29.695 | -14.598 | -14.406 | 1.00 | 0.00 | C | S |
| ATOM | 12064 | C CYS A 443   | 32.042 | -13.701 | -11.178 | 1.00 | 0.00 | C | C |

|      |       |     |           |        |         |         |      |      |   |   |
|------|-------|-----|-----------|--------|---------|---------|------|------|---|---|
| ATOM | 12065 | O   | CYS A 443 | 31.565 | -13.248 | -10.139 | 1.00 | 0.00 | C | O |
| ATOM | 12066 | N   | LEU A 444 | 33.186 | -14.404 | -11.196 | 1.00 | 0.00 | C | N |
| ATOM | 12067 | CA  | LEU A 444 | 33.933 | -14.739 | -10.014 | 1.00 | 0.00 | C | C |
| ATOM | 12068 | CB  | LEU A 444 | 35.167 | -15.588 | -10.390 | 1.00 | 0.00 | C | C |
| ATOM | 12069 | CG  | LEU A 444 | 36.136 | -15.952 | -9.251  | 1.00 | 0.00 | C | C |
| ATOM | 12070 | CD1 | LEU A 444 | 36.981 | -14.743 | -8.825  | 1.00 | 0.00 | C | C |
| ATOM | 12071 | CD2 | LEU A 444 | 35.405 | -16.621 | -8.079  | 1.00 | 0.00 | C | C |
| ATOM | 12072 | C   | LEU A 444 | 34.375 | -13.470 | -9.350  | 1.00 | 0.00 | C | C |
| ATOM | 12073 | O   | LEU A 444 | 34.368 | -13.342 | -8.128  | 1.00 | 0.00 | C | O |
| ATOM | 12074 | N   | TYR A 445 | 34.768 | -12.475 | -10.150 | 1.00 | 0.00 | C | N |
| ATOM | 12075 | CA  | TYR A 445 | 35.221 | -11.240 | -9.595  | 1.00 | 0.00 | C | C |
| ATOM | 12076 | CB  | TYR A 445 | 35.647 | -10.272 | -10.719 | 1.00 | 0.00 | C | C |
| ATOM | 12077 | CG  | TYR A 445 | 35.853 | -8.894  | -10.197 | 1.00 | 0.00 | C | C |
| ATOM | 12078 | CD1 | TYR A 445 | 37.041 | -8.526  | -9.613  | 1.00 | 0.00 | C | C |
| ATOM | 12079 | CE1 | TYR A 445 | 37.220 | -7.246  | -9.139  | 1.00 | 0.00 | C | C |
| ATOM | 12080 | CZ  | TYR A 445 | 36.207 | -6.322  | -9.244  | 1.00 | 0.00 | C | C |
| ATOM | 12081 | OH  | TYR A 445 | 36.390 | -5.009  | -8.761  | 1.00 | 0.00 | C | O |
| ATOM | 12082 | CD2 | TYR A 445 | 34.844 | -7.960  | -10.294 | 1.00 | 0.00 | C | C |
| ATOM | 12083 | CE2 | TYR A 445 | 35.017 | -6.681  | -9.823  | 1.00 | 0.00 | C | C |
| ATOM | 12084 | C   | TYR A 445 | 34.099 | -10.640 | -8.809  | 1.00 | 0.00 | C | C |
| ATOM | 12085 | O   | TYR A 445 | 34.298 | -10.113 | -7.715  | 1.00 | 0.00 | C | O |
| ATOM | 12086 | N   | MET A 446 | 32.877 | -10.719 | -9.357  | 1.00 | 0.00 | C | N |
| ATOM | 12087 | CA  | MET A 446 | 31.730 | -10.110 | -8.750  | 1.00 | 0.00 | C | C |
| ATOM | 12088 | CB  | MET A 446 | 30.488 | -10.216 | -9.644  | 1.00 | 0.00 | C | C |
| ATOM | 12089 | CG  | MET A 446 | 30.733 | -9.627  | -11.032 | 1.00 | 0.00 | C | C |
| ATOM | 12090 | SD  | MET A 446 | 31.555 | -8.009  | -11.001 | 1.00 | 0.00 | C | S |
| ATOM | 12091 | CE  | MET A 446 | 30.425 | -7.251  | -9.803  | 1.00 | 0.00 | C | C |
| ATOM | 12092 | C   | MET A 446 | 31.412 | -10.745 | -7.434  | 1.00 | 0.00 | C | C |
| ATOM | 12093 | O   | MET A 446 | 31.091 | -10.054 | -6.468  | 1.00 | 0.00 | C | O |
| ATOM | 12094 | N   | ILE A 447 | 31.493 | -12.084 | -7.352  | 1.00 | 0.00 | C | N |
| ATOM | 12095 | CA  | ILE A 447 | 31.125 | -12.768 | -6.151  | 1.00 | 0.00 | C | C |
| ATOM | 12096 | CB  | ILE A 447 | 31.142 | -14.259 | -6.316  | 1.00 | 0.00 | C | C |
| ATOM | 12097 | CG2 | ILE A 447 | 30.105 | -14.615 | -7.395  | 1.00 | 0.00 | C | C |
| ATOM | 12098 | CG1 | ILE A 447 | 32.557 | -14.740 | -6.646  | 1.00 | 0.00 | C | C |
| ATOM | 12099 | CD  | ILE A 447 | 32.690 | -16.245 | -6.839  | 1.00 | 0.00 | C | C |
| ATOM | 12100 | C   | ILE A 447 | 32.061 | -12.356 | -5.055  | 1.00 | 0.00 | C | C |
| ATOM | 12101 | O   | ILE A 447 | 31.643 | -12.157 | -3.915  | 1.00 | 0.00 | C | O |
| ATOM | 12102 | N   | ILE A 448 | 33.356 | -12.221 | -5.375  | 1.00 | 0.00 | C | N |

|      |       |     |           |        |         |        |      |      |   |   |
|------|-------|-----|-----------|--------|---------|--------|------|------|---|---|
| ATOM | 12103 | CA  | ILE A 448 | 34.338 | -11.851 | -4.399 | 1.00 | 0.00 | C | C |
| ATOM | 12104 | CB  | ILE A 448 | 35.730 | -11.865 | -4.946 | 1.00 | 0.00 | C | C |
| ATOM | 12105 | CG2 | ILE A 448 | 36.682 | -11.349 | -3.856 | 1.00 | 0.00 | C | C |
| ATOM | 12106 | CG1 | ILE A 448 | 36.078 | -13.272 | -5.443 | 1.00 | 0.00 | C | C |
| ATOM | 12107 | CD  | ILE A 448 | 37.337 | -13.285 | -6.295 | 1.00 | 0.00 | C | C |
| ATOM | 12108 | C   | ILE A 448 | 34.102 | -10.454 | -3.904 | 1.00 | 0.00 | C | C |
| ATOM | 12109 | O   | ILE A 448 | 34.196 | -10.194 | -2.706 | 1.00 | 0.00 | C | O |
| ATOM | 12110 | N   | PHE A 449 | 33.791 | -9.511  | -4.813 | 1.00 | 0.00 | C | N |
| ATOM | 12111 | CA  | PHE A 449 | 33.655 | -8.131  | -4.426 | 1.00 | 0.00 | C | C |
| ATOM | 12112 | CB  | PHE A 449 | 33.303 | -7.221  | -5.619 | 1.00 | 0.00 | C | C |
| ATOM | 12113 | CG  | PHE A 449 | 33.406 | -5.787  | -5.208 | 1.00 | 0.00 | C | C |
| ATOM | 12114 | CD1 | PHE A 449 | 32.414 | -5.185  | -4.471 | 1.00 | 0.00 | C | C |
| ATOM | 12115 | CE1 | PHE A 449 | 32.513 | -3.862  | -4.105 | 1.00 | 0.00 | C | C |
| ATOM | 12116 | CZ  | PHE A 449 | 33.610 | -3.123  | -4.474 | 1.00 | 0.00 | C | C |
| ATOM | 12117 | CD2 | PHE A 449 | 34.501 | -5.036  | -5.578 | 1.00 | 0.00 | C | C |
| ATOM | 12118 | CE2 | PHE A 449 | 34.607 | -3.713  | -5.215 | 1.00 | 0.00 | C | C |
| ATOM | 12119 | C   | PHE A 449 | 32.540 | -8.023  | -3.432 | 1.00 | 0.00 | C | C |
| ATOM | 12120 | O   | PHE A 449 | 32.663 | -7.333  | -2.421 | 1.00 | 0.00 | C | O |
| ATOM | 12121 | N   | THR A 450 | 31.407 | -8.688  | -3.720 | 1.00 | 0.00 | C | N |
| ATOM | 12122 | CA  | THR A 450 | 30.259 | -8.664  | -2.863 | 1.00 | 0.00 | C | C |
| ATOM | 12123 | CB  | THR A 450 | 29.047 | -9.274  | -3.506 | 1.00 | 0.00 | C | C |
| ATOM | 12124 | OG1 | THR A 450 | 27.894 | -9.033  | -2.710 | 1.00 | 0.00 | C | O |
| ATOM | 12125 | CG2 | THR A 450 | 29.275 | -10.786 | -3.679 | 1.00 | 0.00 | C | C |
| ATOM | 12126 | C   | THR A 450 | 30.532 | -9.401  | -1.589 | 1.00 | 0.00 | C | C |
| ATOM | 12127 | O   | THR A 450 | 30.114 | -8.965  | -0.523 | 1.00 | 0.00 | C | O |
| ATOM | 12128 | N   | MET A 451 | 31.240 | -10.545 | -1.658 | 1.00 | 0.00 | C | N |
| ATOM | 12129 | CA  | MET A 451 | 31.440 | -11.332 | -0.473 | 1.00 | 0.00 | C | C |
| ATOM | 12130 | CB  | MET A 451 | 32.193 | -12.648 | -0.727 | 1.00 | 0.00 | C | C |
| ATOM | 12131 | CG  | MET A 451 | 31.349 | -13.699 | -1.445 | 1.00 | 0.00 | C | C |
| ATOM | 12132 | SD  | MET A 451 | 32.179 | -15.299 | -1.673 | 1.00 | 0.00 | C | S |
| ATOM | 12133 | CE  | MET A 451 | 30.681 | -16.165 | -2.225 | 1.00 | 0.00 | C | C |
| ATOM | 12134 | C   | MET A 451 | 32.218 | -10.567 | 0.548  | 1.00 | 0.00 | C | C |
| ATOM | 12135 | O   | MET A 451 | 31.861 | -10.556 | 1.724  | 1.00 | 0.00 | C | O |
| ATOM | 12136 | N   | ALA A 452 | 33.307 | -9.900  | 0.133  | 1.00 | 0.00 | C | N |
| ATOM | 12137 | CA  | ALA A 452 | 34.090 | -9.185  | 1.093  | 1.00 | 0.00 | C | C |
| ATOM | 12138 | CB  | ALA A 452 | 35.329 | -8.515  | 0.478  | 1.00 | 0.00 | C | C |
| ATOM | 12139 | C   | ALA A 452 | 33.237 | -8.101  | 1.660  | 1.00 | 0.00 | C | C |
| ATOM | 12140 | O   | ALA A 452 | 33.231 | -7.867  | 2.867  | 1.00 | 0.00 | C | O |

|      |       |     |           |        |         |       |      |      |   |   |
|------|-------|-----|-----------|--------|---------|-------|------|------|---|---|
| ATOM | 12141 | N   | ALA A 453 | 32.472 | -7.419  | 0.791 | 1.00 | 0.00 | C | N |
| ATOM | 12142 | CA  | ALA A 453 | 31.654 | -6.317  | 1.209 | 1.00 | 0.00 | C | C |
| ATOM | 12143 | CB  | ALA A 453 | 30.924 | -5.646  | 0.032 | 1.00 | 0.00 | C | C |
| ATOM | 12144 | C   | ALA A 453 | 30.612 | -6.798  | 2.173 | 1.00 | 0.00 | C | C |
| ATOM | 12145 | O   | ALA A 453 | 30.360 | -6.161  | 3.193 | 1.00 | 0.00 | C | O |
| ATOM | 12146 | N   | TYR A 454 | 29.982 | -7.948  | 1.872 | 1.00 | 0.00 | C | N |
| ATOM | 12147 | CA  | TYR A 454 | 28.941 | -8.489  | 2.700 | 1.00 | 0.00 | C | C |
| ATOM | 12148 | CB  | TYR A 454 | 28.339 | -9.776  | 2.107 | 1.00 | 0.00 | C | C |
| ATOM | 12149 | CG  | TYR A 454 | 27.468 | -10.395 | 3.148 | 1.00 | 0.00 | C | C |
| ATOM | 12150 | CD1 | TYR A 454 | 26.160 | -9.998  | 3.305 | 1.00 | 0.00 | C | C |
| ATOM | 12151 | CE1 | TYR A 454 | 25.367 | -10.576 | 4.269 | 1.00 | 0.00 | C | C |
| ATOM | 12152 | CZ  | TYR A 454 | 25.878 | -11.558 | 5.082 | 1.00 | 0.00 | C | C |
| ATOM | 12153 | OH  | TYR A 454 | 25.059 | -12.148 | 6.068 | 1.00 | 0.00 | C | O |
| ATOM | 12154 | CD2 | TYR A 454 | 27.971 | -11.378 | 3.968 | 1.00 | 0.00 | C | C |
| ATOM | 12155 | CE2 | TYR A 454 | 27.185 | -11.959 | 4.932 | 1.00 | 0.00 | C | C |
| ATOM | 12156 | C   | TYR A 454 | 29.514 | -8.853  | 4.039 | 1.00 | 0.00 | C | C |
| ATOM | 12157 | O   | TYR A 454 | 28.949 | -8.534  | 5.083 | 1.00 | 0.00 | C | O |
| ATOM | 12158 | N   | TYR A 455 | 30.661 | -9.548  | 4.014 | 1.00 | 0.00 | C | N |
| ATOM | 12159 | CA  | TYR A 455 | 31.388 | -10.059 | 5.142 | 1.00 | 0.00 | C | C |
| ATOM | 12160 | CB  | TYR A 455 | 32.417 | -11.149 | 4.796 | 1.00 | 0.00 | C | C |
| ATOM | 12161 | CG  | TYR A 455 | 31.662 | -12.389 | 4.468 | 1.00 | 0.00 | C | C |
| ATOM | 12162 | CD1 | TYR A 455 | 31.001 | -13.078 | 5.460 | 1.00 | 0.00 | C | C |
| ATOM | 12163 | CE1 | TYR A 455 | 30.304 | -14.227 | 5.173 | 1.00 | 0.00 | C | C |
| ATOM | 12164 | CZ  | TYR A 455 | 30.269 | -14.704 | 3.885 | 1.00 | 0.00 | C | C |
| ATOM | 12165 | OH  | TYR A 455 | 29.556 | -15.883 | 3.583 | 1.00 | 0.00 | C | O |
| ATOM | 12166 | CD2 | TYR A 455 | 31.630 | -12.878 | 3.184 | 1.00 | 0.00 | C | C |
| ATOM | 12167 | CE2 | TYR A 455 | 30.936 | -14.027 | 2.890 | 1.00 | 0.00 | C | C |
| ATOM | 12168 | C   | TYR A 455 | 32.108 | -9.011  | 5.940 | 1.00 | 0.00 | C | C |
| ATOM | 12169 | O   | TYR A 455 | 32.469 | -9.286  | 7.081 | 1.00 | 0.00 | C | O |
| ATOM | 12170 | N   | ARG A 456 | 32.421 | -7.837  | 5.352 | 1.00 | 0.00 | C | N |
| ATOM | 12171 | CA  | ARG A 456 | 33.270 | -6.841  | 5.965 | 1.00 | 0.00 | C | C |
| ATOM | 12172 | CB  | ARG A 456 | 33.209 | -5.453  | 5.302 | 1.00 | 0.00 | C | C |
| ATOM | 12173 | CG  | ARG A 456 | 31.814 | -4.827  | 5.364 | 1.00 | 0.00 | C | C |
| ATOM | 12174 | CD  | ARG A 456 | 31.771 | -3.328  | 5.060 | 1.00 | 0.00 | C | C |
| ATOM | 12175 | NE  | ARG A 456 | 32.178 | -2.590  | 6.287 | 1.00 | 0.00 | C | N |
| ATOM | 12176 | CZ  | ARG A 456 | 32.857 | -1.409  | 6.181 | 1.00 | 0.00 | C | C |
| ATOM | 12177 | NH1 | ARG A 456 | 33.213 | -0.947  | 4.948 | 1.00 | 0.00 | C | N |
| ATOM | 12178 | NH2 | ARG A 456 | 33.178 | -0.696  | 7.299 | 1.00 | 0.00 | C | N |

|      |       |     |           |        |        |        |      |      |   |   |
|------|-------|-----|-----------|--------|--------|--------|------|------|---|---|
| ATOM | 12179 | C   | ARG A 456 | 32.920 | -6.607 | 7.403  | 1.00 | 0.00 | C | C |
| ATOM | 12180 | O   | ARG A 456 | 31.754 | -6.557 | 7.796  | 1.00 | 0.00 | C | O |
| ATOM | 12181 | N   | PRO A 457 | 33.966 | -6.508 | 8.195  | 1.00 | 0.00 | C | N |
| ATOM | 12182 | CD  | PRO A 457 | 35.157 | -7.296 | 7.927  | 1.00 | 0.00 | C | C |
| ATOM | 12183 | CA  | PRO A 457 | 33.813 | -6.238 | 9.601  | 1.00 | 0.00 | C | C |
| ATOM | 12184 | CB  | PRO A 457 | 35.131 | -6.640 | 10.261 | 1.00 | 0.00 | C | C |
| ATOM | 12185 | CG  | PRO A 457 | 35.714 | -7.691 | 9.305  | 1.00 | 0.00 | C | C |
| ATOM | 12186 | C   | PRO A 457 | 33.452 | -4.810 | 9.860  | 1.00 | 0.00 | C | C |
| ATOM | 12187 | O   | PRO A 457 | 34.060 | -3.922 | 9.260  | 1.00 | 0.00 | C | O |
| ATOM | 12188 | N   | VAL A 458 | 32.491 | -4.576 | 10.775 | 1.00 | 0.00 | C | N |
| ATOM | 12189 | CA  | VAL A 458 | 32.042 | -3.257 | 11.124 | 1.00 | 0.00 | C | C |
| ATOM | 12190 | CB  | VAL A 458 | 30.843 | -3.287 | 12.022 | 1.00 | 0.00 | C | C |
| ATOM | 12191 | CG1 | VAL A 458 | 30.516 | -1.850 | 12.464 | 1.00 | 0.00 | C | C |
| ATOM | 12192 | CG2 | VAL A 458 | 29.699 | -3.986 | 11.267 | 1.00 | 0.00 | C | C |
| ATOM | 12193 | C   | VAL A 458 | 33.133 | -2.532 | 11.836 | 1.00 | 0.00 | C | C |
| ATOM | 12194 | O   | VAL A 458 | 33.405 | -1.372 | 11.519 | 1.00 | 0.00 | C | O |
| ATOM | 12195 | N   | ASP A 459 | 33.787 | -3.249 | 12.777 | 1.00 | 0.00 | C | N |
| ATOM | 12196 | CA  | ASP A 459 | 34.829 | -2.819 | 13.666 | 1.00 | 0.00 | C | C |
| ATOM | 12197 | CB  | ASP A 459 | 36.235 | -3.221 | 13.194 | 1.00 | 0.00 | C | C |
| ATOM | 12198 | CG  | ASP A 459 | 36.352 | -4.732 | 13.327 | 1.00 | 0.00 | C | C |
| ATOM | 12199 | OD1 | ASP A 459 | 35.934 | -5.266 | 14.388 | 1.00 | 0.00 | C | O |
| ATOM | 12200 | OD2 | ASP A 459 | 36.869 | -5.370 | 12.369 | 1.00 | 0.00 | C | O |
| ATOM | 12201 | C   | ASP A 459 | 34.802 | -1.354 | 13.845 | 1.00 | 0.00 | C | C |
| ATOM | 12202 | O   | ASP A 459 | 33.799 | -0.764 | 14.252 | 1.00 | 0.00 | C | O |
| ATOM | 12203 | N   | GLY A 460 | 35.982 | -0.782 | 13.584 | 1.00 | 0.00 | C | N |
| ATOM | 12204 | CA  | GLY A 460 | 36.250 | 0.606  | 13.539 | 1.00 | 0.00 | C | C |
| ATOM | 12205 | C   | GLY A 460 | 36.328 | 0.865  | 12.077 | 1.00 | 0.00 | C | C |
| ATOM | 12206 | O   | GLY A 460 | 35.431 | 0.475  | 11.329 | 1.00 | 0.00 | C | O |
| ATOM | 12207 | N   | LEU A 461 | 37.411 | 1.523  | 11.631 | 1.00 | 0.00 | C | N |
| ATOM | 12208 | CA  | LEU A 461 | 37.586 | 1.841  | 10.245 | 1.00 | 0.00 | C | C |
| ATOM | 12209 | CB  | LEU A 461 | 37.996 | 3.303  | 10.064 | 1.00 | 0.00 | C | C |
| ATOM | 12210 | CG  | LEU A 461 | 36.929 | 4.309  | 10.546 | 1.00 | 0.00 | C | C |
| ATOM | 12211 | CD1 | LEU A 461 | 36.692 | 4.216  | 12.062 | 1.00 | 0.00 | C | C |
| ATOM | 12212 | CD2 | LEU A 461 | 37.271 | 5.739  | 10.114 | 1.00 | 0.00 | C | C |
| ATOM | 12213 | C   | LEU A 461 | 38.666 | 0.941  | 9.730  | 1.00 | 0.00 | C | C |
| ATOM | 12214 | O   | LEU A 461 | 39.559 | 0.587  | 10.487 | 1.00 | 0.00 | C | O |
| ATOM | 12215 | N   | PRO A 462 | 38.715 | 0.679  | 8.455  | 1.00 | 0.00 | C | N |
| ATOM | 12216 | CD  | PRO A 462 | 38.621 | 1.784  | 7.514  | 1.00 | 0.00 | C | C |

|      |       |     |           |        |         |        |      |      |   |   |
|------|-------|-----|-----------|--------|---------|--------|------|------|---|---|
| ATOM | 12217 | CA  | PRO A 462 | 39.450 | -0.437  | 7.899  | 1.00 | 0.00 | C | C |
| ATOM | 12218 | CB  | PRO A 462 | 39.661 | -0.101  | 6.424  | 1.00 | 0.00 | C | C |
| ATOM | 12219 | CG  | PRO A 462 | 39.595 | 1.434   | 6.381  | 1.00 | 0.00 | C | C |
| ATOM | 12220 | C   | PRO A 462 | 40.684 | -0.993  | 8.564  | 1.00 | 0.00 | C | C |
| ATOM | 12221 | O   | PRO A 462 | 40.509 | -2.125  | 9.026  | 1.00 | 0.00 | C | O |
| ATOM | 12222 | N   | PRO A 463 | 41.861 | -0.437  | 8.700  | 1.00 | 0.00 | C | N |
| ATOM | 12223 | CD  | PRO A 463 | 42.440 | 0.435   | 7.691  | 1.00 | 0.00 | C | C |
| ATOM | 12224 | CA  | PRO A 463 | 42.875 | -1.148  | 9.439  | 1.00 | 0.00 | C | C |
| ATOM | 12225 | CB  | PRO A 463 | 44.222 | -0.686  | 8.882  | 1.00 | 0.00 | C | C |
| ATOM | 12226 | CG  | PRO A 463 | 43.897 | 0.622   | 8.144  | 1.00 | 0.00 | C | C |
| ATOM | 12227 | C   | PRO A 463 | 42.683 | -0.802  | 10.871 | 1.00 | 0.00 | C | C |
| ATOM | 12228 | O   | PRO A 463 | 42.054 | 0.221   | 11.135 | 1.00 | 0.00 | C | O |
| ATOM | 12229 | N   | PHE A 464 | 43.226 | -1.605  | 11.806 | 1.00 | 0.00 | C | N |
| ATOM | 12230 | CA  | PHE A 464 | 43.975 | -2.767  | 11.448 | 1.00 | 0.00 | C | C |
| ATOM | 12231 | CB  | PHE A 464 | 45.123 | -3.103  | 12.416 | 1.00 | 0.00 | C | C |
| ATOM | 12232 | CG  | PHE A 464 | 46.211 | -2.127  | 12.119 | 1.00 | 0.00 | C | C |
| ATOM | 12233 | CD1 | PHE A 464 | 46.212 | -0.869  | 12.676 | 1.00 | 0.00 | C | C |
| ATOM | 12234 | CE1 | PHE A 464 | 47.219 | 0.023   | 12.388 | 1.00 | 0.00 | C | C |
| ATOM | 12235 | CZ  | PHE A 464 | 48.236 | -0.334  | 11.536 | 1.00 | 0.00 | C | C |
| ATOM | 12236 | CD2 | PHE A 464 | 47.233 | -2.475  | 11.263 | 1.00 | 0.00 | C | C |
| ATOM | 12237 | CE2 | PHE A 464 | 48.241 | -1.586  | 10.974 | 1.00 | 0.00 | C | C |
| ATOM | 12238 | C   | PHE A 464 | 43.061 | -3.943  | 11.334 | 1.00 | 0.00 | C | C |
| ATOM | 12239 | O   | PHE A 464 | 41.953 | -3.947  | 11.867 | 1.00 | 0.00 | C | O |
| ATOM | 12240 | N   | LYS A 465 | 43.514 | -4.960  | 10.576 | 1.00 | 0.00 | C | N |
| ATOM | 12241 | CA  | LYS A 465 | 42.760 | -6.163  | 10.374 | 1.00 | 0.00 | C | C |
| ATOM | 12242 | CB  | LYS A 465 | 42.664 | -6.570  | 8.894  | 1.00 | 0.00 | C | C |
| ATOM | 12243 | CG  | LYS A 465 | 41.971 | -5.533  | 8.009  | 1.00 | 0.00 | C | C |
| ATOM | 12244 | CD  | LYS A 465 | 42.191 | -5.771  | 6.514  | 1.00 | 0.00 | C | C |
| ATOM | 12245 | CE  | LYS A 465 | 43.640 | -5.569  | 6.068  | 1.00 | 0.00 | C | C |
| ATOM | 12246 | NZ  | LYS A 465 | 44.004 | -4.135  | 6.152  | 1.00 | 0.00 | C | N |
| ATOM | 12247 | C   | LYS A 465 | 43.503 | -7.275  | 11.062 | 1.00 | 0.00 | C | C |
| ATOM | 12248 | O   | LYS A 465 | 44.730 | -7.321  | 11.028 | 1.00 | 0.00 | C | O |
| ATOM | 12249 | N   | MET A 466 | 42.762 | -8.195  | 11.721 | 1.00 | 0.00 | C | N |
| ATOM | 12250 | CA  | MET A 466 | 43.328 | -9.297  | 12.453 | 1.00 | 0.00 | C | C |
| ATOM | 12251 | CB  | MET A 466 | 42.261 | -10.120 | 13.199 | 1.00 | 0.00 | C | C |
| ATOM | 12252 | CG  | MET A 466 | 41.403 | -9.323  | 14.191 | 1.00 | 0.00 | C | C |
| ATOM | 12253 | SD  | MET A 466 | 40.188 | -10.341 | 15.088 | 1.00 | 0.00 | C | S |
| ATOM | 12254 | CE  | MET A 466 | 39.014 | -9.021  | 15.512 | 1.00 | 0.00 | C | C |

|      |       |     |           |        |         |        |      |      |   |   |
|------|-------|-----|-----------|--------|---------|--------|------|------|---|---|
| ATOM | 12255 | C   | MET A 466 | 44.011 | -10.250 | 11.515 | 1.00 | 0.00 | C | C |
| ATOM | 12256 | O   | MET A 466 | 45.123 | -10.704 | 11.779 | 1.00 | 0.00 | C | O |
| ATOM | 12257 | N   | GLU A 467 | 43.367 | -10.560 | 10.374 | 1.00 | 0.00 | C | N |
| ATOM | 12258 | CA  | GLU A 467 | 43.928 | -11.502 | 9.449  | 1.00 | 0.00 | C | C |
| ATOM | 12259 | CB  | GLU A 467 | 45.332 | -11.108 | 8.972  | 1.00 | 0.00 | C | C |
| ATOM | 12260 | CG  | GLU A 467 | 45.370 | -9.848  | 8.114  | 1.00 | 0.00 | C | C |
| ATOM | 12261 | CD  | GLU A 467 | 46.829 | -9.628  | 7.746  | 1.00 | 0.00 | C | C |
| ATOM | 12262 | OE1 | GLU A 467 | 47.627 | -10.581 | 7.952  | 1.00 | 0.00 | C | O |
| ATOM | 12263 | OE2 | GLU A 467 | 47.167 | -8.517  | 7.256  | 1.00 | 0.00 | C | O |
| ATOM | 12264 | C   | GLU A 467 | 44.070 | -12.838 | 10.122 | 1.00 | 0.00 | C | C |
| ATOM | 12265 | O   | GLU A 467 | 45.012 | -13.579 | 9.842  | 1.00 | 0.00 | C | O |
| ATOM | 12266 | N   | LYS A 468 | 43.127 | -13.202 | 11.016 | 1.00 | 0.00 | C | N |
| ATOM | 12267 | CA  | LYS A 468 | 43.169 | -14.478 | 11.677 | 1.00 | 0.00 | C | C |
| ATOM | 12268 | CB  | LYS A 468 | 42.720 | -14.438 | 13.148 | 1.00 | 0.00 | C | C |
| ATOM | 12269 | CG  | LYS A 468 | 43.780 | -13.813 | 14.060 | 1.00 | 0.00 | C | C |
| ATOM | 12270 | CD  | LYS A 468 | 45.119 | -14.555 | 13.996 | 1.00 | 0.00 | C | C |
| ATOM | 12271 | CE  | LYS A 468 | 46.233 | -13.934 | 14.842 | 1.00 | 0.00 | C | C |
| ATOM | 12272 | NZ  | LYS A 468 | 47.484 | -14.715 | 14.682 | 1.00 | 0.00 | C | N |
| ATOM | 12273 | C   | LYS A 468 | 42.272 | -15.417 | 10.924 | 1.00 | 0.00 | C | C |
| ATOM | 12274 | O   | LYS A 468 | 41.940 | -15.168 | 9.773  | 1.00 | 0.00 | C | O |
| ATOM | 12275 | N   | THR A 469 | 41.875 | -16.546 | 11.544 | 1.00 | 0.00 | C | N |
| ATOM | 12276 | CA  | THR A 469 | 41.062 | -17.494 | 10.831 | 1.00 | 0.00 | C | C |
| ATOM | 12277 | CB  | THR A 469 | 40.685 | -18.692 | 11.650 | 1.00 | 0.00 | C | C |
| ATOM | 12278 | OG1 | THR A 469 | 40.024 | -19.654 | 10.839 | 1.00 | 0.00 | C | O |
| ATOM | 12279 | CG2 | THR A 469 | 39.766 | -18.236 | 12.798 | 1.00 | 0.00 | C | C |
| ATOM | 12280 | C   | THR A 469 | 39.803 | -16.813 | 10.409 | 1.00 | 0.00 | C | C |
| ATOM | 12281 | O   | THR A 469 | 39.287 | -15.933 | 11.094 | 1.00 | 0.00 | C | O |
| ATOM | 12282 | N   | GLY A 470 | 39.316 | -17.125 | 9.190  | 1.00 | 0.00 | C | N |
| ATOM | 12283 | CA  | GLY A 470 | 38.098 | -16.546 | 8.695  | 1.00 | 0.00 | C | C |
| ATOM | 12284 | C   | GLY A 470 | 38.467 | -15.222 | 8.122  | 1.00 | 0.00 | C | C |
| ATOM | 12285 | O   | GLY A 470 | 37.885 | -14.757 | 7.142  | 1.00 | 0.00 | C | O |
| ATOM | 12286 | N   | ASP A 471 | 39.450 | -14.577 | 8.773  | 1.00 | 0.00 | C | N |
| ATOM | 12287 | CA  | ASP A 471 | 40.024 | -13.343 | 8.371  | 1.00 | 0.00 | C | C |
| ATOM | 12288 | CB  | ASP A 471 | 40.859 | -12.651 | 9.451  | 1.00 | 0.00 | C | C |
| ATOM | 12289 | CG  | ASP A 471 | 39.894 | -12.126 | 10.505 | 1.00 | 0.00 | C | C |
| ATOM | 12290 | OD1 | ASP A 471 | 38.658 | -12.200 | 10.267 | 1.00 | 0.00 | C | O |
| ATOM | 12291 | OD2 | ASP A 471 | 40.382 | -11.640 | 11.559 | 1.00 | 0.00 | C | O |
| ATOM | 12292 | C   | ASP A 471 | 40.886 | -13.623 | 7.194  | 1.00 | 0.00 | C | C |



|      |       |     |           |        |         |       |      |      |   |   |
|------|-------|-----|-----------|--------|---------|-------|------|------|---|---|
| ATOM | 12293 | O   | ASP A 471 | 41.185 | -12.730 | 6.412 | 1.00 | 0.00 | C | O |
| ATOM | 12294 | N   | TYR A 472 | 41.368 | -14.870 | 7.074 | 1.00 | 0.00 | C | N |
| ATOM | 12295 | CA  | TYR A 472 | 42.229 | -15.187 | 5.976 | 1.00 | 0.00 | C | C |
| ATOM | 12296 | CB  | TYR A 472 | 42.813 | -16.608 | 6.097 | 1.00 | 0.00 | C | C |
| ATOM | 12297 | CG  | TYR A 472 | 43.826 | -16.818 | 5.024 | 1.00 | 0.00 | C | C |
| ATOM | 12298 | CD1 | TYR A 472 | 45.060 | -16.209 | 5.098 | 1.00 | 0.00 | C | C |
| ATOM | 12299 | CE1 | TYR A 472 | 46.003 | -16.404 | 4.115 | 1.00 | 0.00 | C | C |
| ATOM | 12300 | CZ  | TYR A 472 | 45.722 | -17.219 | 3.046 | 1.00 | 0.00 | C | C |
| ATOM | 12301 | OH  | TYR A 472 | 46.685 | -17.424 | 2.035 | 1.00 | 0.00 | C | O |
| ATOM | 12302 | CD2 | TYR A 472 | 43.559 | -17.640 | 3.955 | 1.00 | 0.00 | C | C |
| ATOM | 12303 | CE2 | TYR A 472 | 44.498 | -17.839 | 2.968 | 1.00 | 0.00 | C | C |
| ATOM | 12304 | C   | TYR A 472 | 41.458 | -15.081 | 4.692 | 1.00 | 0.00 | C | C |
| ATOM | 12305 | O   | TYR A 472 | 41.924 | -14.464 | 3.736 | 1.00 | 0.00 | C | O |
| ATOM | 12306 | N   | PHE A 473 | 40.241 | -15.661 | 4.643 | 1.00 | 0.00 | C | N |
| ATOM | 12307 | CA  | PHE A 473 | 39.467 | -15.674 | 3.431 | 1.00 | 0.00 | C | C |
| ATOM | 12308 | CB  | PHE A 473 | 38.165 | -16.491 | 3.514 | 1.00 | 0.00 | C | C |
| ATOM | 12309 | CG  | PHE A 473 | 38.502 | -17.937 | 3.460 | 1.00 | 0.00 | C | C |
| ATOM | 12310 | CD1 | PHE A 473 | 38.825 | -18.520 | 2.258 | 1.00 | 0.00 | C | C |
| ATOM | 12311 | CE1 | PHE A 473 | 39.132 | -19.859 | 2.187 | 1.00 | 0.00 | C | C |
| ATOM | 12312 | CZ  | PHE A 473 | 39.113 | -20.624 | 3.327 | 1.00 | 0.00 | C | C |
| ATOM | 12313 | CD2 | PHE A 473 | 38.477 | -18.713 | 4.597 | 1.00 | 0.00 | C | C |
| ATOM | 12314 | CE2 | PHE A 473 | 38.783 | -20.052 | 4.531 | 1.00 | 0.00 | C | C |
| ATOM | 12315 | C   | PHE A 473 | 39.051 | -14.296 | 3.017 | 1.00 | 0.00 | C | C |
| ATOM | 12316 | O   | PHE A 473 | 39.171 | -13.937 | 1.847 | 1.00 | 0.00 | C | O |
| ATOM | 12317 | N   | ARG A 474 | 38.537 | -13.488 | 3.961 | 1.00 | 0.00 | C | N |
| ATOM | 12318 | CA  | ARG A 474 | 38.019 | -12.201 | 3.599 | 1.00 | 0.00 | C | C |
| ATOM | 12319 | CB  | ARG A 474 | 37.325 | -11.473 | 4.759 | 1.00 | 0.00 | C | C |
| ATOM | 12320 | CG  | ARG A 474 | 38.243 | -11.123 | 5.927 | 1.00 | 0.00 | C | C |
| ATOM | 12321 | CD  | ARG A 474 | 37.495 | -10.447 | 7.075 | 1.00 | 0.00 | C | C |
| ATOM | 12322 | NE  | ARG A 474 | 38.508 | -9.848  | 7.985 | 1.00 | 0.00 | C | N |
| ATOM | 12323 | CZ  | ARG A 474 | 38.914 | -8.562  | 7.781 | 1.00 | 0.00 | C | C |
| ATOM | 12324 | NH1 | ARG A 474 | 38.363 | -7.826  | 6.772 | 1.00 | 0.00 | C | N |
| ATOM | 12325 | NH2 | ARG A 474 | 39.872 | -8.013  | 8.583 | 1.00 | 0.00 | C | N |
| ATOM | 12326 | C   | ARG A 474 | 39.118 | -11.314 | 3.094 | 1.00 | 0.00 | C | C |
| ATOM | 12327 | O   | ARG A 474 | 38.928 | -10.573 | 2.130 | 1.00 | 0.00 | C | O |
| ATOM | 12328 | N   | VAL A 475 | 40.302 | -11.374 | 3.727 | 1.00 | 0.00 | C | N |
| ATOM | 12329 | CA  | VAL A 475 | 41.402 | -10.527 | 3.353 | 1.00 | 0.00 | C | C |
| ATOM | 12330 | CB  | VAL A 475 | 42.615 | -10.712 | 4.216 | 1.00 | 0.00 | C | C |

|      |       |               |        |         |        |      |      |   |   |
|------|-------|---------------|--------|---------|--------|------|------|---|---|
| ATOM | 12331 | CG1 VAL A 475 | 43.753 | -9.860  | 3.629  | 1.00 | 0.00 | C | C |
| ATOM | 12332 | CG2 VAL A 475 | 42.257 | -10.321 | 5.659  | 1.00 | 0.00 | C | C |
| ATOM | 12333 | C VAL A 475   | 41.803 | -10.815 | 1.942  | 1.00 | 0.00 | C | C |
| ATOM | 12334 | O VAL A 475   | 42.129 | -9.903  | 1.185  | 1.00 | 0.00 | C | O |
| ATOM | 12335 | N THR A 476   | 41.807 | -12.100 | 1.546  | 1.00 | 0.00 | C | N |
| ATOM | 12336 | CA THR A 476  | 42.219 | -12.420 | 0.212  | 1.00 | 0.00 | C | C |
| ATOM | 12337 | CB THR A 476  | 42.247 | -13.898 | -0.059 | 1.00 | 0.00 | C | C |
| ATOM | 12338 | OG1 THR A 476 | 40.942 | -14.447 | 0.042  | 1.00 | 0.00 | C | O |
| ATOM | 12339 | CG2 THR A 476 | 43.182 | -14.564 | 0.964  | 1.00 | 0.00 | C | C |
| ATOM | 12340 | C THR A 476   | 41.247 | -11.791 | -0.736 | 1.00 | 0.00 | C | C |
| ATOM | 12341 | O THR A 476   | 41.635 | -11.249 | -1.770 | 1.00 | 0.00 | C | O |
| ATOM | 12342 | N GLY A 477   | 39.949 | -11.839 | -0.391 | 1.00 | 0.00 | C | N |
| ATOM | 12343 | CA GLY A 477  | 38.934 | -11.320 | -1.262 | 1.00 | 0.00 | C | C |
| ATOM | 12344 | C GLY A 477   | 39.111 | -9.847  | -1.460 | 1.00 | 0.00 | C | C |
| ATOM | 12345 | O GLY A 477   | 38.927 | -9.343  | -2.567 | 1.00 | 0.00 | C | O |
| ATOM | 12346 | N GLU A 478   | 39.453 | -9.108  | -0.388 | 1.00 | 0.00 | C | N |
| ATOM | 12347 | CA GLU A 478  | 39.569 | -7.683  | -0.496 | 1.00 | 0.00 | C | C |
| ATOM | 12348 | CB GLU A 478  | 39.877 | -6.991  | 0.846  | 1.00 | 0.00 | C | C |
| ATOM | 12349 | CG GLU A 478  | 41.266 | -7.309  | 1.399  | 1.00 | 0.00 | C | C |
| ATOM | 12350 | CD GLU A 478  | 41.429 | -6.610  | 2.740  | 1.00 | 0.00 | C | C |
| ATOM | 12351 | OE1 GLU A 478 | 40.390 | -6.238  | 3.347  | 1.00 | 0.00 | C | O |
| ATOM | 12352 | OE2 GLU A 478 | 42.599 | -6.446  | 3.179  | 1.00 | 0.00 | C | O |
| ATOM | 12353 | C GLU A 478   | 40.681 | -7.346  | -1.436 | 1.00 | 0.00 | C | C |
| ATOM | 12354 | O GLU A 478   | 40.545 | -6.455  | -2.275 | 1.00 | 0.00 | C | O |
| ATOM | 12355 | N ILE A 479   | 41.820 | -8.050  | -1.319 | 1.00 | 0.00 | C | N |
| ATOM | 12356 | CA ILE A 479  | 42.934 | -7.773  | -2.179 | 1.00 | 0.00 | C | C |
| ATOM | 12357 | CB ILE A 479  | 44.169 | -8.557  | -1.839 | 1.00 | 0.00 | C | C |
| ATOM | 12358 | CG2 ILE A 479 | 45.194 | -8.334  | -2.964 | 1.00 | 0.00 | C | C |
| ATOM | 12359 | CG1 ILE A 479 | 44.689 | -8.166  | -0.445 | 1.00 | 0.00 | C | C |
| ATOM | 12360 | CD ILE A 479  | 45.802 | -9.077  | 0.071  | 1.00 | 0.00 | C | C |
| ATOM | 12361 | C ILE A 479   | 42.553 | -8.108  | -3.585 | 1.00 | 0.00 | C | C |
| ATOM | 12362 | O ILE A 479   | 42.852 | -7.359  | -4.513 | 1.00 | 0.00 | C | O |
| ATOM | 12363 | N LEU A 480   | 41.865 | -9.249  | -3.772 | 1.00 | 0.00 | C | N |
| ATOM | 12364 | CA LEU A 480  | 41.513 | -9.719  | -5.080 | 1.00 | 0.00 | C | C |
| ATOM | 12365 | CB LEU A 480  | 40.804 | -11.081 | -5.044 | 1.00 | 0.00 | C | C |
| ATOM | 12366 | CG LEU A 480  | 41.679 | -12.197 | -4.441 | 1.00 | 0.00 | C | C |
| ATOM | 12367 | CD1 LEU A 480 | 40.986 | -13.565 | -4.528 | 1.00 | 0.00 | C | C |
| ATOM | 12368 | CD2 LEU A 480 | 43.089 | -12.189 | -5.055 | 1.00 | 0.00 | C | C |

|      |       |     |           |        |        |         |      |      |   |   |
|------|-------|-----|-----------|--------|--------|---------|------|------|---|---|
| ATOM | 12369 | C   | LEU A 480 | 40.593 | -8.743 | -5.749  | 1.00 | 0.00 | C | C |
| ATOM | 12370 | O   | LEU A 480 | 40.739 | -8.463 | -6.936  | 1.00 | 0.00 | C | O |
| ATOM | 12371 | N   | SER A 481 | 39.620 | -8.190 | -5.002  | 1.00 | 0.00 | C | N |
| ATOM | 12372 | CA  | SER A 481 | 38.670 | -7.296 | -5.600  | 1.00 | 0.00 | C | C |
| ATOM | 12373 | CB  | SER A 481 | 37.588 | -6.828 | -4.610  | 1.00 | 0.00 | C | C |
| ATOM | 12374 | OG  | SER A 481 | 38.171 | -6.060 | -3.569  | 1.00 | 0.00 | C | O |
| ATOM | 12375 | C   | SER A 481 | 39.373 | -6.074 | -6.110  | 1.00 | 0.00 | C | C |
| ATOM | 12376 | O   | SER A 481 | 39.084 | -5.593 | -7.204  | 1.00 | 0.00 | C | O |
| ATOM | 12377 | N   | VAL A 482 | 40.324 | -5.533 | -5.329  | 1.00 | 0.00 | C | N |
| ATOM | 12378 | CA  | VAL A 482 | 41.013 | -4.345 | -5.742  | 1.00 | 0.00 | C | C |
| ATOM | 12379 | CB  | VAL A 482 | 41.998 | -3.858 | -4.723  | 1.00 | 0.00 | C | C |
| ATOM | 12380 | CG1 | VAL A 482 | 42.682 | -2.591 | -5.263  | 1.00 | 0.00 | C | C |
| ATOM | 12381 | CG2 | VAL A 482 | 41.266 | -3.668 | -3.382  | 1.00 | 0.00 | C | C |
| ATOM | 12382 | C   | VAL A 482 | 41.780 | -4.651 | -6.988  | 1.00 | 0.00 | C | C |
| ATOM | 12383 | O   | VAL A 482 | 41.790 | -3.868 | -7.938  | 1.00 | 0.00 | C | O |
| ATOM | 12384 | N   | LEU A 483 | 42.432 | -5.831 | -7.016  | 1.00 | 0.00 | C | N |
| ATOM | 12385 | CA  | LEU A 483 | 43.249 | -6.237 | -8.123  | 1.00 | 0.00 | C | C |
| ATOM | 12386 | CB  | LEU A 483 | 43.884 | -7.623 | -7.888  | 1.00 | 0.00 | C | C |
| ATOM | 12387 | CG  | LEU A 483 | 44.950 | -8.088 | -8.913  | 1.00 | 0.00 | C | C |
| ATOM | 12388 | CD1 | LEU A 483 | 45.482 | -9.480 | -8.540  | 1.00 | 0.00 | C | C |
| ATOM | 12389 | CD2 | LEU A 483 | 44.458 | -8.056 | -10.368 | 1.00 | 0.00 | C | C |
| ATOM | 12390 | C   | LEU A 483 | 42.346 | -6.314 | -9.309  | 1.00 | 0.00 | C | C |
| ATOM | 12391 | O   | LEU A 483 | 42.718 | -5.924 | -10.415 | 1.00 | 0.00 | C | O |
| ATOM | 12392 | N   | GLY A 484 | 41.123 | -6.831 | -9.105  | 1.00 | 0.00 | C | N |
| ATOM | 12393 | CA  | GLY A 484 | 40.197 | -6.951 | -10.185 | 1.00 | 0.00 | C | C |
| ATOM | 12394 | C   | GLY A 484 | 39.903 | -5.575 | -10.688 | 1.00 | 0.00 | C | C |
| ATOM | 12395 | O   | GLY A 484 | 39.706 | -5.362 | -11.883 | 1.00 | 0.00 | C | O |
| ATOM | 12396 | N   | GLY A 485 | 39.844 | -4.603 | -9.762  | 1.00 | 0.00 | C | N |
| ATOM | 12397 | CA  | GLY A 485 | 39.515 | -3.249 | -10.100 | 1.00 | 0.00 | C | C |
| ATOM | 12398 | C   | GLY A 485 | 40.539 | -2.649 | -11.017 | 1.00 | 0.00 | C | C |
| ATOM | 12399 | O   | GLY A 485 | 40.189 | -1.903 | -11.929 | 1.00 | 0.00 | C | O |
| ATOM | 12400 | N   | VAL A 486 | 41.833 | -2.944 | -10.797 | 1.00 | 0.00 | C | N |
| ATOM | 12401 | CA  | VAL A 486 | 42.880 | -2.314 | -11.558 | 1.00 | 0.00 | C | C |
| ATOM | 12402 | CB  | VAL A 486 | 44.256 | -2.684 | -11.091 | 1.00 | 0.00 | C | C |
| ATOM | 12403 | CG1 | VAL A 486 | 44.528 | -4.150 | -11.467 | 1.00 | 0.00 | C | C |
| ATOM | 12404 | CG2 | VAL A 486 | 45.260 | -1.688 | -11.693 | 1.00 | 0.00 | C | C |
| ATOM | 12405 | C   | VAL A 486 | 42.783 | -2.673 | -13.010 | 1.00 | 0.00 | C | C |
| ATOM | 12406 | O   | VAL A 486 | 43.042 | -1.843 | -13.881 | 1.00 | 0.00 | C | O |

|      |       |     |           |        |        |         |      |      |   |   |
|------|-------|-----|-----------|--------|--------|---------|------|------|---|---|
| ATOM | 12407 | N   | TYR A 487 | 42.397 | -3.923 | -13.318 | 1.00 | 0.00 | C | N |
| ATOM | 12408 | CA  | TYR A 487 | 42.405 | -4.354 | -14.686 | 1.00 | 0.00 | C | C |
| ATOM | 12409 | CB  | TYR A 487 | 41.988 | -5.821 | -14.861 | 1.00 | 0.00 | C | C |
| ATOM | 12410 | CG  | TYR A 487 | 42.118 | -6.097 | -16.316 | 1.00 | 0.00 | C | C |
| ATOM | 12411 | CD1 | TYR A 487 | 43.357 | -6.368 | -16.843 | 1.00 | 0.00 | C | C |
| ATOM | 12412 | CE1 | TYR A 487 | 43.509 | -6.618 | -18.184 | 1.00 | 0.00 | C | C |
| ATOM | 12413 | CZ  | TYR A 487 | 42.417 | -6.590 | -19.011 | 1.00 | 0.00 | C | C |
| ATOM | 12414 | OH  | TYR A 487 | 42.572 | -6.848 | -20.390 | 1.00 | 0.00 | C | O |
| ATOM | 12415 | CD2 | TYR A 487 | 41.026 | -6.055 | -17.152 | 1.00 | 0.00 | C | C |
| ATOM | 12416 | CE2 | TYR A 487 | 41.174 | -6.307 | -18.496 | 1.00 | 0.00 | C | C |
| ATOM | 12417 | C   | TYR A 487 | 41.469 | -3.507 | -15.489 | 1.00 | 0.00 | C | C |
| ATOM | 12418 | O   | TYR A 487 | 41.785 | -3.113 | -16.610 | 1.00 | 0.00 | C | O |
| ATOM | 12419 | N   | PHE A 488 | 40.289 | -3.198 | -14.927 | 1.00 | 0.00 | C | N |
| ATOM | 12420 | CA  | PHE A 488 | 39.311 | -2.412 | -15.619 | 1.00 | 0.00 | C | C |
| ATOM | 12421 | CB  | PHE A 488 | 38.035 | -2.182 | -14.781 | 1.00 | 0.00 | C | C |
| ATOM | 12422 | CG  | PHE A 488 | 37.302 | -3.470 | -14.589 | 1.00 | 0.00 | C | C |
| ATOM | 12423 | CD1 | PHE A 488 | 36.490 | -3.965 | -15.583 | 1.00 | 0.00 | C | C |
| ATOM | 12424 | CE1 | PHE A 488 | 35.805 | -5.146 | -15.410 | 1.00 | 0.00 | C | C |
| ATOM | 12425 | CZ  | PHE A 488 | 35.920 | -5.846 | -14.234 | 1.00 | 0.00 | C | C |
| ATOM | 12426 | CD2 | PHE A 488 | 37.402 | -4.175 | -13.408 | 1.00 | 0.00 | C | C |
| ATOM | 12427 | CE2 | PHE A 488 | 36.719 | -5.357 | -13.229 | 1.00 | 0.00 | C | C |
| ATOM | 12428 | C   | PHE A 488 | 39.892 | -1.060 | -15.907 | 1.00 | 0.00 | C | C |
| ATOM | 12429 | O   | PHE A 488 | 39.719 | -0.524 | -17.002 | 1.00 | 0.00 | C | O |
| ATOM | 12430 | N   | PHE A 489 | 40.595 | -0.460 | -14.924 | 1.00 | 0.00 | C | N |
| ATOM | 12431 | CA  | PHE A 489 | 41.134 | 0.857  | -15.119 | 1.00 | 0.00 | C | C |
| ATOM | 12432 | CB  | PHE A 489 | 41.827 | 1.438  | -13.873 | 1.00 | 0.00 | C | C |
| ATOM | 12433 | CG  | PHE A 489 | 42.298 | 2.803  | -14.249 | 1.00 | 0.00 | C | C |
| ATOM | 12434 | CD1 | PHE A 489 | 41.472 | 3.892  | -14.081 | 1.00 | 0.00 | C | C |
| ATOM | 12435 | CE1 | PHE A 489 | 41.893 | 5.155  | -14.427 | 1.00 | 0.00 | C | C |
| ATOM | 12436 | CZ  | PHE A 489 | 43.149 | 5.340  | -14.952 | 1.00 | 0.00 | C | C |
| ATOM | 12437 | CD2 | PHE A 489 | 43.552 | 2.998  | -14.781 | 1.00 | 0.00 | C | C |
| ATOM | 12438 | CE2 | PHE A 489 | 43.977 | 4.260  | -15.129 | 1.00 | 0.00 | C | C |
| ATOM | 12439 | C   | PHE A 489 | 42.153 | 0.817  | -16.215 | 1.00 | 0.00 | C | C |
| ATOM | 12440 | O   | PHE A 489 | 42.184 | 1.696  | -17.074 | 1.00 | 0.00 | C | O |
| ATOM | 12441 | N   | PHE A 490 | 43.030 | -0.206 | -16.210 | 1.00 | 0.00 | C | N |
| ATOM | 12442 | CA  | PHE A 490 | 44.065 | -0.300 | -17.202 | 1.00 | 0.00 | C | C |
| ATOM | 12443 | CB  | PHE A 490 | 45.031 | -1.472 | -16.944 | 1.00 | 0.00 | C | C |
| ATOM | 12444 | CG  | PHE A 490 | 46.033 | -1.537 | -18.047 | 1.00 | 0.00 | C | C |

|      |       |               |        |        |         |      |      |   |   |
|------|-------|---------------|--------|--------|---------|------|------|---|---|
| ATOM | 12445 | CD1 PHE A 490 | 47.036 | -0.600 | -18.156 | 1.00 | 0.00 | C | C |
| ATOM | 12446 | CE1 PHE A 490 | 47.957 | -0.677 | -19.175 | 1.00 | 0.00 | C | C |
| ATOM | 12447 | CZ PHE A 490  | 47.889 | -1.699 | -20.092 | 1.00 | 0.00 | C | C |
| ATOM | 12448 | CD2 PHE A 490 | 45.979 | -2.560 | -18.966 | 1.00 | 0.00 | C | C |
| ATOM | 12449 | CE2 PHE A 490 | 46.899 | -2.643 | -19.986 | 1.00 | 0.00 | C | C |
| ATOM | 12450 | C PHE A 490   | 43.454 | -0.478 | -18.558 | 1.00 | 0.00 | C | C |
| ATOM | 12451 | O PHE A 490   | 43.865 | 0.172  | -19.516 | 1.00 | 0.00 | C | O |
| ATOM | 12452 | N ARG A 491   | 42.450 | -1.365 | -18.679 | 1.00 | 0.00 | C | N |
| ATOM | 12453 | CA ARG A 491  | 41.851 | -1.617 | -19.960 | 1.00 | 0.00 | C | C |
| ATOM | 12454 | CB ARG A 491  | 40.838 | -2.779 | -19.929 | 1.00 | 0.00 | C | C |
| ATOM | 12455 | CG ARG A 491  | 39.681 | -2.578 | -18.949 | 1.00 | 0.00 | C | C |
| ATOM | 12456 | CD ARG A 491  | 38.826 | -3.835 | -18.752 | 1.00 | 0.00 | C | C |
| ATOM | 12457 | NE ARG A 491  | 37.955 | -3.990 | -19.949 | 1.00 | 0.00 | C | N |
| ATOM | 12458 | CZ ARG A 491  | 36.644 | -3.614 | -19.886 | 1.00 | 0.00 | C | C |
| ATOM | 12459 | NH1 ARG A 491 | 36.122 | -3.161 | -18.708 | 1.00 | 0.00 | C | N |
| ATOM | 12460 | NH2 ARG A 491 | 35.852 | -3.701 | -20.995 | 1.00 | 0.00 | C | N |
| ATOM | 12461 | C ARG A 491   | 41.161 | -0.384 | -20.459 | 1.00 | 0.00 | C | C |
| ATOM | 12462 | O ARG A 491   | 41.223 | -0.072 | -21.646 | 1.00 | 0.00 | C | O |
| ATOM | 12463 | N GLY A 492   | 40.480 | 0.353  | -19.561 | 1.00 | 0.00 | C | N |
| ATOM | 12464 | CA GLY A 492  | 39.724 | 1.517  | -19.939 | 1.00 | 0.00 | C | C |
| ATOM | 12465 | C GLY A 492   | 40.609 | 2.595  | -20.488 | 1.00 | 0.00 | C | C |
| ATOM | 12466 | O GLY A 492   | 40.246 | 3.276  | -21.447 | 1.00 | 0.00 | C | O |
| ATOM | 12467 | N ILE A 493   | 41.799 | 2.785  | -19.889 | 1.00 | 0.00 | C | N |
| ATOM | 12468 | CA ILE A 493  | 42.659 | 3.858  | -20.293 | 1.00 | 0.00 | C | C |
| ATOM | 12469 | CB ILE A 493  | 43.915 | 3.960  | -19.471 | 1.00 | 0.00 | C | C |
| ATOM | 12470 | CG2 ILE A 493 | 44.803 | 2.739  | -19.760 | 1.00 | 0.00 | C | C |
| ATOM | 12471 | CG1 ILE A 493 | 44.606 | 5.311  | -19.726 | 1.00 | 0.00 | C | C |
| ATOM | 12472 | CD ILE A 493  | 45.694 | 5.637  | -18.705 | 1.00 | 0.00 | C | C |
| ATOM | 12473 | C ILE A 493   | 43.032 | 3.663  | -21.721 | 1.00 | 0.00 | C | C |
| ATOM | 12474 | O ILE A 493   | 43.094 | 4.626  | -22.483 | 1.00 | 0.00 | C | O |
| ATOM | 12475 | N GLN A 494   | 43.291 | 2.410  | -22.123 | 1.00 | 0.00 | C | N |
| ATOM | 12476 | CA GLN A 494  | 43.670 | 2.109  | -23.471 | 1.00 | 0.00 | C | C |
| ATOM | 12477 | CB GLN A 494  | 43.911 | 0.609  | -23.700 | 1.00 | 0.00 | C | C |
| ATOM | 12478 | CG GLN A 494  | 44.317 | 0.273  | -25.136 | 1.00 | 0.00 | C | C |
| ATOM | 12479 | CD GLN A 494  | 44.346 | -1.242 | -25.265 | 1.00 | 0.00 | C | C |
| ATOM | 12480 | OE1 GLN A 494 | 45.154 | -1.806 | -26.000 | 1.00 | 0.00 | C | O |
| ATOM | 12481 | NE2 GLN A 494 | 43.425 | -1.923 | -24.531 | 1.00 | 0.00 | C | N |
| ATOM | 12482 | C GLN A 494   | 42.550 | 2.485  | -24.378 | 1.00 | 0.00 | C | C |

|      |       |     |           |        |        |         |      |      |   |   |
|------|-------|-----|-----------|--------|--------|---------|------|------|---|---|
| ATOM | 12483 | O   | GLN A 494 | 42.779 | 2.960  | -25.483 | 1.00 | 0.00 | C | O |
| ATOM | 12484 | N   | TYR A 495 | 41.297 | 2.264  | -23.958 | 1.00 | 0.00 | C | N |
| ATOM | 12485 | CA  | TYR A 495 | 40.201 | 2.568  | -24.831 | 1.00 | 0.00 | C | C |
| ATOM | 12486 | CB  | TYR A 495 | 38.848 | 2.160  | -24.228 | 1.00 | 0.00 | C | C |
| ATOM | 12487 | CG  | TYR A 495 | 37.813 | 2.234  | -25.297 | 1.00 | 0.00 | C | C |
| ATOM | 12488 | CD1 | TYR A 495 | 37.136 | 3.402  | -25.559 | 1.00 | 0.00 | C | C |
| ATOM | 12489 | CE1 | TYR A 495 | 36.183 | 3.443  | -26.549 | 1.00 | 0.00 | C | C |
| ATOM | 12490 | CZ  | TYR A 495 | 35.900 | 2.318  | -27.287 | 1.00 | 0.00 | C | C |
| ATOM | 12491 | OH  | TYR A 495 | 34.920 | 2.360  | -28.301 | 1.00 | 0.00 | C | O |
| ATOM | 12492 | CD2 | TYR A 495 | 37.529 | 1.116  | -26.044 | 1.00 | 0.00 | C | C |
| ATOM | 12493 | CE2 | TYR A 495 | 36.577 | 1.150  | -27.035 | 1.00 | 0.00 | C | C |
| ATOM | 12494 | C   | TYR A 495 | 40.199 | 4.045  | -25.070 | 1.00 | 0.00 | C | C |
| ATOM | 12495 | O   | TYR A 495 | 40.001 | 4.507  | -26.192 | 1.00 | 0.00 | C | O |
| ATOM | 12496 | N   | PHE A 496 | 40.408 | 4.827  | -23.996 | 1.00 | 0.00 | C | N |
| ATOM | 12497 | CA  | PHE A 496 | 40.440 | 6.255  | -24.092 | 1.00 | 0.00 | C | C |
| ATOM | 12498 | CB  | PHE A 496 | 40.588 | 6.904  | -22.702 | 1.00 | 0.00 | C | C |
| ATOM | 12499 | CG  | PHE A 496 | 40.474 | 8.388  | -22.804 | 1.00 | 0.00 | C | C |
| ATOM | 12500 | CD1 | PHE A 496 | 39.246 | 8.979  | -22.981 | 1.00 | 0.00 | C | C |
| ATOM | 12501 | CE1 | PHE A 496 | 39.127 | 10.345 | -23.067 | 1.00 | 0.00 | C | C |
| ATOM | 12502 | CZ  | PHE A 496 | 40.245 | 11.139 | -22.966 | 1.00 | 0.00 | C | C |
| ATOM | 12503 | CD2 | PHE A 496 | 41.586 | 9.191  | -22.694 | 1.00 | 0.00 | C | C |
| ATOM | 12504 | CE2 | PHE A 496 | 41.476 | 10.561 | -22.777 | 1.00 | 0.00 | C | C |
| ATOM | 12505 | C   | PHE A 496 | 41.621 | 6.654  | -24.921 | 1.00 | 0.00 | C | C |
| ATOM | 12506 | O   | PHE A 496 | 41.509 | 7.494  | -25.813 | 1.00 | 0.00 | C | O |
| ATOM | 12507 | N   | LEU A 497 | 42.790 | 6.044  | -24.646 | 1.00 | 0.00 | C | N |
| ATOM | 12508 | CA  | LEU A 497 | 44.020 | 6.406  | -25.290 | 1.00 | 0.00 | C | C |
| ATOM | 12509 | CB  | LEU A 497 | 45.251 | 5.760  | -24.619 | 1.00 | 0.00 | C | C |
| ATOM | 12510 | CG  | LEU A 497 | 46.625 | 6.315  | -25.067 | 1.00 | 0.00 | C | C |
| ATOM | 12511 | CD1 | LEU A 497 | 47.741 | 5.739  | -24.184 | 1.00 | 0.00 | C | C |
| ATOM | 12512 | CD2 | LEU A 497 | 46.920 | 6.083  | -26.558 | 1.00 | 0.00 | C | C |
| ATOM | 12513 | C   | LEU A 497 | 43.996 | 6.050  | -26.744 | 1.00 | 0.00 | C | C |
| ATOM | 12514 | O   | LEU A 497 | 44.439 | 6.828  | -27.587 | 1.00 | 0.00 | C | O |
| ATOM | 12515 | N   | GLN A 498 | 43.476 | 4.865  | -27.087 | 1.00 | 0.00 | C | N |
| ATOM | 12516 | CA  | GLN A 498 | 43.477 | 4.392  | -28.437 | 1.00 | 0.00 | C | C |
| ATOM | 12517 | CB  | GLN A 498 | 42.801 | 3.020  | -28.525 | 1.00 | 0.00 | C | C |
| ATOM | 12518 | CG  | GLN A 498 | 42.751 | 2.401  | -29.916 | 1.00 | 0.00 | C | C |
| ATOM | 12519 | CD  | GLN A 498 | 42.046 | 1.069  | -29.728 | 1.00 | 0.00 | C | C |
| ATOM | 12520 | OE1 | GLN A 498 | 40.979 | 1.008  | -29.120 | 1.00 | 0.00 | C | O |

|      |       |     |           |        |        |         |      |      |   |   |
|------|-------|-----|-----------|--------|--------|---------|------|------|---|---|
| ATOM | 12521 | NE2 | GLN A 498 | 42.667 | -0.028 | -30.235 | 1.00 | 0.00 | C | N |
| ATOM | 12522 | C   | GLN A 498 | 42.688 | 5.357  | -29.254 | 1.00 | 0.00 | C | C |
| ATOM | 12523 | O   | GLN A 498 | 43.125 | 5.773  | -30.326 | 1.00 | 0.00 | C | O |
| ATOM | 12524 | N   | ARG A 499 | 41.500 | 5.748  | -28.760 | 1.00 | 0.00 | C | N |
| ATOM | 12525 | CA  | ARG A 499 | 40.739 | 6.710  | -29.493 | 1.00 | 0.00 | C | C |
| ATOM | 12526 | CB  | ARG A 499 | 39.361 | 6.207  | -29.949 | 1.00 | 0.00 | C | C |
| ATOM | 12527 | CG  | ARG A 499 | 39.467 | 5.168  | -31.064 | 1.00 | 0.00 | C | C |
| ATOM | 12528 | CD  | ARG A 499 | 40.036 | 5.761  | -32.353 | 1.00 | 0.00 | C | C |
| ATOM | 12529 | NE  | ARG A 499 | 40.070 | 4.679  | -33.373 | 1.00 | 0.00 | C | N |
| ATOM | 12530 | CZ  | ARG A 499 | 39.669 | 4.949  | -34.646 | 1.00 | 0.00 | C | C |
| ATOM | 12531 | NH1 | ARG A 499 | 39.260 | 6.208  | -34.979 | 1.00 | 0.00 | C | N |
| ATOM | 12532 | NH2 | ARG A 499 | 39.647 | 3.955  | -35.583 | 1.00 | 0.00 | C | N |
| ATOM | 12533 | C   | ARG A 499 | 40.523 | 7.885  | -28.605 | 1.00 | 0.00 | C | C |
| ATOM | 12534 | O   | ARG A 499 | 39.661 | 7.885  | -27.727 | 1.00 | 0.00 | C | O |
| ATOM | 12535 | N   | ARG A 500 | 41.317 | 8.932  | -28.862 | 1.00 | 0.00 | C | N |
| ATOM | 12536 | CA  | ARG A 500 | 41.319 | 10.174 | -28.152 | 1.00 | 0.00 | C | C |
| ATOM | 12537 | CB  | ARG A 500 | 42.402 | 11.115 | -28.699 | 1.00 | 0.00 | C | C |
| ATOM | 12538 | CG  | ARG A 500 | 43.807 | 10.524 | -28.608 | 1.00 | 0.00 | C | C |
| ATOM | 12539 | CD  | ARG A 500 | 44.817 | 11.222 | -29.517 | 1.00 | 0.00 | C | C |
| ATOM | 12540 | NE  | ARG A 500 | 44.432 | 10.922 | -30.926 | 1.00 | 0.00 | C | N |
| ATOM | 12541 | CZ  | ARG A 500 | 44.895 | 11.706 | -31.943 | 1.00 | 0.00 | C | C |
| ATOM | 12542 | NH1 | ARG A 500 | 45.673 | 12.792 | -31.665 | 1.00 | 0.00 | C | N |
| ATOM | 12543 | NH2 | ARG A 500 | 44.580 | 11.404 | -33.237 | 1.00 | 0.00 | C | N |
| ATOM | 12544 | C   | ARG A 500 | 40.008 | 10.873 | -28.348 | 1.00 | 0.00 | C | C |
| ATOM | 12545 | O   | ARG A 500 | 39.485 | 11.459 | -27.400 | 1.00 | 0.00 | C | O |
| ATOM | 12546 | N   | PRO A 501 | 39.434 | 10.835 | -29.526 | 1.00 | 0.00 | C | N |
| ATOM | 12547 | CD  | PRO A 501 | 40.202 | 10.805 | -30.762 | 1.00 | 0.00 | C | C |
| ATOM | 12548 | CA  | PRO A 501 | 38.213 | 11.560 | -29.726 | 1.00 | 0.00 | C | C |
| ATOM | 12549 | CB  | PRO A 501 | 37.935 | 11.528 | -31.233 | 1.00 | 0.00 | C | C |
| ATOM | 12550 | CG  | PRO A 501 | 39.110 | 10.730 | -31.838 | 1.00 | 0.00 | C | C |
| ATOM | 12551 | C   | PRO A 501 | 37.109 | 11.069 | -28.852 | 1.00 | 0.00 | C | C |
| ATOM | 12552 | O   | PRO A 501 | 37.034 | 9.877  | -28.566 | 1.00 | 0.00 | C | O |
| ATOM | 12553 | N   | SER A 502 | 36.232 | 11.996 | -28.426 | 1.00 | 0.00 | C | N |
| ATOM | 12554 | CA  | SER A 502 | 35.198 | 11.724 | -27.478 | 1.00 | 0.00 | C | C |
| ATOM | 12555 | CB  | SER A 502 | 34.702 | 13.016 | -26.795 | 1.00 | 0.00 | C | C |
| ATOM | 12556 | OG  | SER A 502 | 33.785 | 12.747 | -25.746 | 1.00 | 0.00 | C | O |
| ATOM | 12557 | C   | SER A 502 | 34.050 | 11.065 | -28.158 | 1.00 | 0.00 | C | C |
| ATOM | 12558 | O   | SER A 502 | 34.121 | 10.694 | -29.326 | 1.00 | 0.00 | C | O |

|      |       |     |           |        |        |         |      |      |   |   |
|------|-------|-----|-----------|--------|--------|---------|------|------|---|---|
| ATOM | 12559 | N   | MET A 503 | 32.986 | 10.822 | -27.378 | 1.00 | 0.00 | C | N |
| ATOM | 12560 | CA  | MET A 503 | 31.752 | 10.319 | -27.882 | 1.00 | 0.00 | C | C |
| ATOM | 12561 | CB  | MET A 503 | 31.351 | 8.983  | -27.236 | 1.00 | 0.00 | C | C |
| ATOM | 12562 | CG  | MET A 503 | 31.396 | 9.001  | -25.708 | 1.00 | 0.00 | C | C |
| ATOM | 12563 | SD  | MET A 503 | 31.522 | 7.351  | -24.956 | 1.00 | 0.00 | C | S |
| ATOM | 12564 | CE  | MET A 503 | 33.204 | 7.054  | -25.579 | 1.00 | 0.00 | C | C |
| ATOM | 12565 | C   | MET A 503 | 30.766 | 11.387 | -27.546 | 1.00 | 0.00 | C | C |
| ATOM | 12566 | O   | MET A 503 | 30.793 | 11.943 | -26.448 | 1.00 | 0.00 | C | O |
| ATOM | 12567 | N   | LYS A 504 | 29.883 | 11.717 | -28.504 | 1.00 | 0.00 | C | N |
| ATOM | 12568 | CA  | LYS A 504 | 28.970 | 12.801 | -28.324 | 1.00 | 0.00 | C | C |
| ATOM | 12569 | CB  | LYS A 504 | 28.257 | 13.248 | -29.614 | 1.00 | 0.00 | C | C |
| ATOM | 12570 | CG  | LYS A 504 | 27.543 | 14.592 | -29.466 | 1.00 | 0.00 | C | C |
| ATOM | 12571 | CD  | LYS A 504 | 27.172 | 15.246 | -30.799 | 1.00 | 0.00 | C | C |
| ATOM | 12572 | CE  | LYS A 504 | 26.646 | 16.676 | -30.653 | 1.00 | 0.00 | C | C |
| ATOM | 12573 | NZ  | LYS A 504 | 25.312 | 16.664 | -30.010 | 1.00 | 0.00 | C | N |
| ATOM | 12574 | C   | LYS A 504 | 27.943 | 12.407 | -27.325 | 1.00 | 0.00 | C | C |
| ATOM | 12575 | O   | LYS A 504 | 27.787 | 11.233 | -26.989 | 1.00 | 0.00 | C | O |
| ATOM | 12576 | N   | THR A 505 | 27.240 | 13.418 | -26.791 | 1.00 | 0.00 | C | N |
| ATOM | 12577 | CA  | THR A 505 | 26.239 | 13.196 | -25.799 | 1.00 | 0.00 | C | C |
| ATOM | 12578 | CB  | THR A 505 | 25.610 | 14.468 | -25.322 | 1.00 | 0.00 | C | C |
| ATOM | 12579 | OG1 | THR A 505 | 24.912 | 15.096 | -26.387 | 1.00 | 0.00 | C | O |
| ATOM | 12580 | CG2 | THR A 505 | 26.721 | 15.392 | -24.798 | 1.00 | 0.00 | C | C |
| ATOM | 12581 | C   | THR A 505 | 25.153 | 12.377 | -26.402 | 1.00 | 0.00 | C | C |
| ATOM | 12582 | O   | THR A 505 | 24.624 | 11.474 | -25.759 | 1.00 | 0.00 | C | O |
| ATOM | 12583 | N   | LEU A 506 | 24.802 | 12.657 | -27.672 | 1.00 | 0.00 | C | N |
| ATOM | 12584 | CA  | LEU A 506 | 23.708 | 11.941 | -28.255 | 1.00 | 0.00 | C | C |
| ATOM | 12585 | CB  | LEU A 506 | 23.419 | 12.321 | -29.718 | 1.00 | 0.00 | C | C |
| ATOM | 12586 | CG  | LEU A 506 | 22.842 | 13.733 | -29.908 | 1.00 | 0.00 | C | C |
| ATOM | 12587 | CD1 | LEU A 506 | 22.537 | 14.007 | -31.390 | 1.00 | 0.00 | C | C |
| ATOM | 12588 | CD2 | LEU A 506 | 21.623 | 13.961 | -29.003 | 1.00 | 0.00 | C | C |
| ATOM | 12589 | C   | LEU A 506 | 24.035 | 10.490 | -28.251 | 1.00 | 0.00 | C | C |
| ATOM | 12590 | O   | LEU A 506 | 23.207 | 9.667  | -27.863 | 1.00 | 0.00 | C | O |
| ATOM | 12591 | N   | PHE A 507 | 25.259 | 10.121 | -28.665 | 1.00 | 0.00 | C | N |
| ATOM | 12592 | CA  | PHE A 507 | 25.524 | 8.717  | -28.664 | 1.00 | 0.00 | C | C |
| ATOM | 12593 | CB  | PHE A 507 | 26.171 | 8.190  | -29.958 | 1.00 | 0.00 | C | C |
| ATOM | 12594 | CG  | PHE A 507 | 27.482 | 8.853  | -30.236 | 1.00 | 0.00 | C | C |
| ATOM | 12595 | CD1 | PHE A 507 | 27.524 | 10.096 | -30.826 | 1.00 | 0.00 | C | C |
| ATOM | 12596 | CE1 | PHE A 507 | 28.728 | 10.702 | -31.100 | 1.00 | 0.00 | C | C |



|      |       |     |           |        |        |         |      |      |   |   |
|------|-------|-----|-----------|--------|--------|---------|------|------|---|---|
| ATOM | 12597 | CZ  | PHE A 507 | 29.904 | 10.062 | -30.788 | 1.00 | 0.00 | C | C |
| ATOM | 12598 | CD2 | PHE A 507 | 28.668 | 8.217  | -29.936 | 1.00 | 0.00 | C | C |
| ATOM | 12599 | CE2 | PHE A 507 | 29.874 | 8.816  | -30.207 | 1.00 | 0.00 | C | C |
| ATOM | 12600 | C   | PHE A 507 | 26.406 | 8.377  | -27.517 | 1.00 | 0.00 | C | C |
| ATOM | 12601 | O   | PHE A 507 | 27.578 | 8.746  | -27.470 | 1.00 | 0.00 | C | O |
| ATOM | 12602 | N   | VAL A 508 | 25.838 | 7.639  | -26.550 | 1.00 | 0.00 | C | N |
| ATOM | 12603 | CA  | VAL A 508 | 26.600 | 7.196  | -25.440 | 1.00 | 0.00 | C | C |
| ATOM | 12604 | CB  | VAL A 508 | 25.741 | 6.883  | -24.252 | 1.00 | 0.00 | C | C |
| ATOM | 12605 | CG1 | VAL A 508 | 26.640 | 6.401  | -23.107 | 1.00 | 0.00 | C | C |
| ATOM | 12606 | CG2 | VAL A 508 | 24.895 | 8.122  | -23.909 | 1.00 | 0.00 | C | C |
| ATOM | 12607 | C   | VAL A 508 | 27.191 | 5.917  | -25.917 | 1.00 | 0.00 | C | C |
| ATOM | 12608 | O   | VAL A 508 | 26.970 | 4.851  | -25.346 | 1.00 | 0.00 | C | O |
| ATOM | 12609 | N   | ASP A 509 | 27.987 | 6.015  | -26.992 | 1.00 | 0.00 | C | N |
| ATOM | 12610 | CA  | ASP A 509 | 28.586 | 4.851  | -27.559 | 1.00 | 0.00 | C | C |
| ATOM | 12611 | CB  | ASP A 509 | 28.276 | 4.687  | -29.057 | 1.00 | 0.00 | C | C |
| ATOM | 12612 | CG  | ASP A 509 | 28.870 | 3.374  | -29.551 | 1.00 | 0.00 | C | C |
| ATOM | 12613 | OD1 | ASP A 509 | 30.115 | 3.209  | -29.473 | 1.00 | 0.00 | C | O |
| ATOM | 12614 | OD2 | ASP A 509 | 28.075 | 2.515  | -30.016 | 1.00 | 0.00 | C | O |
| ATOM | 12615 | C   | ASP A 509 | 30.063 | 5.014  | -27.413 | 1.00 | 0.00 | C | C |
| ATOM | 12616 | O   | ASP A 509 | 30.617 | 6.046  | -27.790 | 1.00 | 0.00 | C | O |
| ATOM | 12617 | N   | SER A 510 | 30.738 | 3.984  | -26.867 | 1.00 | 0.00 | C | N |
| ATOM | 12618 | CA  | SER A 510 | 30.053 | 2.788  | -26.471 | 1.00 | 0.00 | C | C |
| ATOM | 12619 | CB  | SER A 510 | 30.951 | 1.534  | -26.474 | 1.00 | 0.00 | C | C |
| ATOM | 12620 | OG  | SER A 510 | 32.006 | 1.673  | -25.536 | 1.00 | 0.00 | C | O |
| ATOM | 12621 | C   | SER A 510 | 29.533 | 2.979  | -25.078 | 1.00 | 0.00 | C | C |
| ATOM | 12622 | O   | SER A 510 | 30.226 | 3.475  | -24.193 | 1.00 | 0.00 | C | O |
| ATOM | 12623 | N   | TYR A 511 | 28.261 | 2.588  | -24.876 | 1.00 | 0.00 | C | N |
| ATOM | 12624 | CA  | TYR A 511 | 27.557 | 2.714  | -23.633 | 1.00 | 0.00 | C | C |
| ATOM | 12625 | CB  | TYR A 511 | 26.102 | 2.229  | -23.801 | 1.00 | 0.00 | C | C |
| ATOM | 12626 | CG  | TYR A 511 | 25.410 | 2.075  | -22.485 | 1.00 | 0.00 | C | C |
| ATOM | 12627 | CD1 | TYR A 511 | 25.486 | 0.897  | -21.776 | 1.00 | 0.00 | C | C |
| ATOM | 12628 | CE1 | TYR A 511 | 24.846 | 0.747  | -20.568 | 1.00 | 0.00 | C | C |
| ATOM | 12629 | CZ  | TYR A 511 | 24.112 | 1.784  | -20.054 | 1.00 | 0.00 | C | C |
| ATOM | 12630 | OH  | TYR A 511 | 23.449 | 1.643  | -18.816 | 1.00 | 0.00 | C | O |
| ATOM | 12631 | CD2 | TYR A 511 | 24.668 | 3.102  | -21.959 | 1.00 | 0.00 | C | C |
| ATOM | 12632 | CE2 | TYR A 511 | 24.024 | 2.961  | -20.754 | 1.00 | 0.00 | C | C |
| ATOM | 12633 | C   | TYR A 511 | 28.159 | 1.851  | -22.564 | 1.00 | 0.00 | C | C |
| ATOM | 12634 | O   | TYR A 511 | 28.411 | 2.312  | -21.453 | 1.00 | 0.00 | C | O |

|      |       |     |           |        |        |         |      |      |   |   |
|------|-------|-----|-----------|--------|--------|---------|------|------|---|---|
| ATOM | 12635 | N   | SER A 512 | 28.395 | 0.565  | -22.881 | 1.00 | 0.00 | C | N |
| ATOM | 12636 | CA  | SER A 512 | 28.804 | -0.409 | -21.908 | 1.00 | 0.00 | C | C |
| ATOM | 12637 | CB  | SER A 512 | 28.712 | -1.844 | -22.457 | 1.00 | 0.00 | C | C |
| ATOM | 12638 | OG  | SER A 512 | 29.564 | -1.990 | -23.585 | 1.00 | 0.00 | C | O |
| ATOM | 12639 | C   | SER A 512 | 30.195 | -0.202 | -21.407 | 1.00 | 0.00 | C | C |
| ATOM | 12640 | O   | SER A 512 | 30.444 | -0.251 | -20.203 | 1.00 | 0.00 | C | O |
| ATOM | 12641 | N   | GLU A 513 | 31.143 | 0.046  | -22.322 | 1.00 | 0.00 | C | N |
| ATOM | 12642 | CA  | GLU A 513 | 32.516 | 0.151  | -21.931 | 1.00 | 0.00 | C | C |
| ATOM | 12643 | CB  | GLU A 513 | 33.445 | 0.297  | -23.146 | 1.00 | 0.00 | C | C |
| ATOM | 12644 | CG  | GLU A 513 | 33.455 | -0.985 | -23.983 | 1.00 | 0.00 | C | C |
| ATOM | 12645 | CD  | GLU A 513 | 34.258 | -0.730 | -25.244 | 1.00 | 0.00 | C | C |
| ATOM | 12646 | OE1 | GLU A 513 | 34.280 | 0.440  | -25.708 | 1.00 | 0.00 | C | O |
| ATOM | 12647 | OE2 | GLU A 513 | 34.861 | -1.706 | -25.760 | 1.00 | 0.00 | C | O |
| ATOM | 12648 | C   | GLU A 513 | 32.666 | 1.320  | -21.013 | 1.00 | 0.00 | C | C |
| ATOM | 12649 | O   | GLU A 513 | 33.442 | 1.271  | -20.057 | 1.00 | 0.00 | C | O |
| ATOM | 12650 | N   | MET A 514 | 31.904 | 2.401  | -21.255 | 1.00 | 0.00 | C | N |
| ATOM | 12651 | CA  | MET A 514 | 32.032 | 3.570  | -20.432 | 1.00 | 0.00 | C | C |
| ATOM | 12652 | CB  | MET A 514 | 31.152 | 4.756  | -20.865 | 1.00 | 0.00 | C | C |
| ATOM | 12653 | CG  | MET A 514 | 29.666 | 4.577  | -20.552 | 1.00 | 0.00 | C | C |
| ATOM | 12654 | SD  | MET A 514 | 28.650 | 6.062  | -20.814 | 1.00 | 0.00 | C | S |
| ATOM | 12655 | CE  | MET A 514 | 28.882 | 6.747  | -19.149 | 1.00 | 0.00 | C | C |
| ATOM | 12656 | C   | MET A 514 | 31.657 | 3.233  | -19.024 | 1.00 | 0.00 | C | C |
| ATOM | 12657 | O   | MET A 514 | 32.267 | 3.739  | -18.086 | 1.00 | 0.00 | C | O |
| ATOM | 12658 | N   | LEU A 515 | 30.637 | 2.376  | -18.833 | 1.00 | 0.00 | C | N |
| ATOM | 12659 | CA  | LEU A 515 | 30.176 | 2.038  | -17.513 | 1.00 | 0.00 | C | C |
| ATOM | 12660 | CB  | LEU A 515 | 28.947 | 1.113  | -17.530 | 1.00 | 0.00 | C | C |
| ATOM | 12661 | CG  | LEU A 515 | 27.705 | 1.765  | -18.165 | 1.00 | 0.00 | C | C |
| ATOM | 12662 | CD1 | LEU A 515 | 26.494 | 0.822  | -18.123 | 1.00 | 0.00 | C | C |
| ATOM | 12663 | CD2 | LEU A 515 | 27.418 | 3.139  | -17.545 | 1.00 | 0.00 | C | C |
| ATOM | 12664 | C   | LEU A 515 | 31.256 | 1.325  | -16.759 | 1.00 | 0.00 | C | C |
| ATOM | 12665 | O   | LEU A 515 | 31.449 | 1.561  | -15.567 | 1.00 | 0.00 | C | O |
| ATOM | 12666 | N   | PHE A 516 | 32.004 | 0.441  | -17.443 | 1.00 | 0.00 | C | N |
| ATOM | 12667 | CA  | PHE A 516 | 33.003 | -0.351 | -16.785 | 1.00 | 0.00 | C | C |
| ATOM | 12668 | CB  | PHE A 516 | 33.702 | -1.355 | -17.720 | 1.00 | 0.00 | C | C |
| ATOM | 12669 | CG  | PHE A 516 | 32.720 | -2.432 | -18.041 | 1.00 | 0.00 | C | C |
| ATOM | 12670 | CD1 | PHE A 516 | 32.472 | -3.437 | -17.132 | 1.00 | 0.00 | C | C |
| ATOM | 12671 | CE1 | PHE A 516 | 31.573 | -4.439 | -17.416 | 1.00 | 0.00 | C | C |
| ATOM | 12672 | CZ  | PHE A 516 | 30.910 | -4.449 | -18.617 | 1.00 | 0.00 | C | C |

|      |       |               |        |        |         |      |      |   |   |
|------|-------|---------------|--------|--------|---------|------|------|---|---|
| ATOM | 12673 | CD2 PHE A 516 | 32.052 | -2.453 | -19.244 | 1.00 | 0.00 | C | C |
| ATOM | 12674 | CE2 PHE A 516 | 31.151 | -3.454 | -19.533 | 1.00 | 0.00 | C | C |
| ATOM | 12675 | C PHE A 516   | 34.043 | 0.540  | -16.182 | 1.00 | 0.00 | C | C |
| ATOM | 12676 | O PHE A 516   | 34.505 | 0.295  | -15.068 | 1.00 | 0.00 | C | O |
| ATOM | 12677 | N PHE A 517   | 34.442 | 1.603  | -16.899 | 1.00 | 0.00 | C | N |
| ATOM | 12678 | CA PHE A 517  | 35.450 | 2.502  | -16.415 | 1.00 | 0.00 | C | C |
| ATOM | 12679 | CB PHE A 517  | 35.773 | 3.620  | -17.423 | 1.00 | 0.00 | C | C |
| ATOM | 12680 | CG PHE A 517  | 36.553 | 4.670  | -16.708 | 1.00 | 0.00 | C | C |
| ATOM | 12681 | CD1 PHE A 517 | 37.881 | 4.484  | -16.415 | 1.00 | 0.00 | C | C |
| ATOM | 12682 | CE1 PHE A 517 | 38.593 | 5.454  | -15.750 | 1.00 | 0.00 | C | C |
| ATOM | 12683 | CZ PHE A 517  | 37.984 | 6.620  | -15.361 | 1.00 | 0.00 | C | C |
| ATOM | 12684 | CD2 PHE A 517 | 35.943 | 5.837  | -16.302 | 1.00 | 0.00 | C | C |
| ATOM | 12685 | CE2 PHE A 517 | 36.652 | 6.811  | -15.639 | 1.00 | 0.00 | C | C |
| ATOM | 12686 | C PHE A 517   | 34.995 | 3.147  | -15.145 | 1.00 | 0.00 | C | C |
| ATOM | 12687 | O PHE A 517   | 35.770 | 3.272  | -14.198 | 1.00 | 0.00 | C | O |
| ATOM | 12688 | N LEU A 518   | 33.724 | 3.577  | -15.088 | 1.00 | 0.00 | C | N |
| ATOM | 12689 | CA LEU A 518  | 33.243 | 4.282  | -13.935 | 1.00 | 0.00 | C | C |
| ATOM | 12690 | CB LEU A 518  | 31.816 | 4.831  | -14.099 | 1.00 | 0.00 | C | C |
| ATOM | 12691 | CG LEU A 518  | 31.340 | 5.632  | -12.869 | 1.00 | 0.00 | C | C |
| ATOM | 12692 | CD1 LEU A 518 | 32.196 | 6.890  | -12.655 | 1.00 | 0.00 | C | C |
| ATOM | 12693 | CD2 LEU A 518 | 29.837 | 5.949  | -12.950 | 1.00 | 0.00 | C | C |
| ATOM | 12694 | C LEU A 518   | 33.253 | 3.389  | -12.726 | 1.00 | 0.00 | C | C |
| ATOM | 12695 | O LEU A 518   | 33.587 | 3.827  | -11.632 | 1.00 | 0.00 | C | O |
| ATOM | 12696 | N GLN A 519   | 32.872 | 2.111  | -12.855 | 1.00 | 0.00 | C | N |
| ATOM | 12697 | CA GLN A 519  | 32.831 | 1.274  | -11.686 | 1.00 | 0.00 | C | C |
| ATOM | 12698 | CB GLN A 519  | 32.328 | -0.148 | -11.976 | 1.00 | 0.00 | C | C |
| ATOM | 12699 | CG GLN A 519  | 32.317 | -1.033 | -10.729 | 1.00 | 0.00 | C | C |
| ATOM | 12700 | CD GLN A 519  | 32.254 | -2.480 | -11.187 | 1.00 | 0.00 | C | C |
| ATOM | 12701 | OE1 GLN A 519 | 32.158 | -2.766 | -12.380 | 1.00 | 0.00 | C | O |
| ATOM | 12702 | NE2 GLN A 519 | 32.324 | -3.427 | -10.213 | 1.00 | 0.00 | C | N |
| ATOM | 12703 | C GLN A 519   | 34.204 | 1.081  | -11.128 | 1.00 | 0.00 | C | C |
| ATOM | 12704 | O GLN A 519   | 34.412 | 1.168  | -9.918  | 1.00 | 0.00 | C | O |
| ATOM | 12705 | N SER A 520   | 35.178 | 0.808  | -12.010 | 1.00 | 0.00 | C | N |
| ATOM | 12706 | CA SER A 520  | 36.504 | 0.486  | -11.571 | 1.00 | 0.00 | C | C |
| ATOM | 12707 | CB SER A 520  | 37.432 | 0.080  | -12.728 | 1.00 | 0.00 | C | C |
| ATOM | 12708 | OG SER A 520  | 37.552 | 1.147  | -13.655 | 1.00 | 0.00 | C | O |
| ATOM | 12709 | C SER A 520   | 37.104 | 1.659  | -10.866 | 1.00 | 0.00 | C | C |
| ATOM | 12710 | O SER A 520   | 37.801 | 1.488  | -9.868  | 1.00 | 0.00 | C | O |

|      |       |     |           |        |        |         |      |      |   |   |
|------|-------|-----|-----------|--------|--------|---------|------|------|---|---|
| ATOM | 12711 | N   | LEU A 521 | 36.855 | 2.888  | -11.354 | 1.00 | 0.00 | C | N |
| ATOM | 12712 | CA  | LEU A 521 | 37.460 | 4.006  | -10.688 | 1.00 | 0.00 | C | C |
| ATOM | 12713 | CB  | LEU A 521 | 37.375 | 5.351  | -11.447 | 1.00 | 0.00 | C | C |
| ATOM | 12714 | CG  | LEU A 521 | 36.426 | 6.449  | -10.907 | 1.00 | 0.00 | C | C |
| ATOM | 12715 | CD1 | LEU A 521 | 34.967 | 6.020  | -10.848 | 1.00 | 0.00 | C | C |
| ATOM | 12716 | CD2 | LEU A 521 | 36.928 | 7.059  | -9.587  | 1.00 | 0.00 | C | C |
| ATOM | 12717 | C   | LEU A 521 | 36.838 | 4.129  | -9.329  | 1.00 | 0.00 | C | C |
| ATOM | 12718 | O   | LEU A 521 | 37.504 | 4.508  | -8.369  | 1.00 | 0.00 | C | O |
| ATOM | 12719 | N   | PHE A 522 | 35.536 | 3.798  | -9.208  | 1.00 | 0.00 | C | N |
| ATOM | 12720 | CA  | PHE A 522 | 34.855 | 3.908  | -7.947  | 1.00 | 0.00 | C | C |
| ATOM | 12721 | CB  | PHE A 522 | 33.366 | 3.513  | -7.997  | 1.00 | 0.00 | C | C |
| ATOM | 12722 | CG  | PHE A 522 | 32.565 | 4.736  | -8.301  | 1.00 | 0.00 | C | C |
| ATOM | 12723 | CD1 | PHE A 522 | 32.347 | 5.165  | -9.588  | 1.00 | 0.00 | C | C |
| ATOM | 12724 | CE1 | PHE A 522 | 31.604 | 6.301  | -9.827  | 1.00 | 0.00 | C | C |
| ATOM | 12725 | CZ  | PHE A 522 | 31.075 | 7.023  | -8.786  | 1.00 | 0.00 | C | C |
| ATOM | 12726 | CD2 | PHE A 522 | 32.033 | 5.469  | -7.265  | 1.00 | 0.00 | C | C |
| ATOM | 12727 | CE2 | PHE A 522 | 31.292 | 6.603  | -7.497  | 1.00 | 0.00 | C | C |
| ATOM | 12728 | C   | PHE A 522 | 35.536 | 3.044  | -6.940  | 1.00 | 0.00 | C | C |
| ATOM | 12729 | O   | PHE A 522 | 35.713 | 3.446  | -5.791  | 1.00 | 0.00 | C | O |
| ATOM | 12730 | N   | MET A 523 | 35.931 | 1.822  | -7.332  | 1.00 | 0.00 | C | N |
| ATOM | 12731 | CA  | MET A 523 | 36.598 | 0.968  | -6.398  | 1.00 | 0.00 | C | C |
| ATOM | 12732 | CB  | MET A 523 | 36.923 | -0.424 | -6.955  | 1.00 | 0.00 | C | C |
| ATOM | 12733 | CG  | MET A 523 | 37.399 | -1.382 | -5.861  | 1.00 | 0.00 | C | C |
| ATOM | 12734 | SD  | MET A 523 | 37.959 | -3.002 | -6.459  | 1.00 | 0.00 | C | S |
| ATOM | 12735 | CE  | MET A 523 | 39.446 | -2.345 | -7.266  | 1.00 | 0.00 | C | C |
| ATOM | 12736 | C   | MET A 523 | 37.905 | 1.602  | -6.010  | 1.00 | 0.00 | C | C |
| ATOM | 12737 | O   | MET A 523 | 38.324 | 1.525  | -4.859  | 1.00 | 0.00 | C | O |
| ATOM | 12738 | N   | LEU A 524 | 38.590 | 2.253  | -6.967  | 1.00 | 0.00 | C | N |
| ATOM | 12739 | CA  | LEU A 524 | 39.871 | 2.843  | -6.686  | 1.00 | 0.00 | C | C |
| ATOM | 12740 | CB  | LEU A 524 | 40.488 | 3.529  | -7.917  | 1.00 | 0.00 | C | C |
| ATOM | 12741 | CG  | LEU A 524 | 40.771 | 2.580  | -9.095  | 1.00 | 0.00 | C | C |
| ATOM | 12742 | CD1 | LEU A 524 | 41.392 | 3.339  | -10.281 | 1.00 | 0.00 | C | C |
| ATOM | 12743 | CD2 | LEU A 524 | 41.607 | 1.365  | -8.659  | 1.00 | 0.00 | C | C |
| ATOM | 12744 | C   | LEU A 524 | 39.688 | 3.902  | -5.648  | 1.00 | 0.00 | C | C |
| ATOM | 12745 | O   | LEU A 524 | 40.507 | 4.059  | -4.744  | 1.00 | 0.00 | C | O |
| ATOM | 12746 | N   | ALA A 525 | 38.593 | 4.671  | -5.753  | 1.00 | 0.00 | C | N |
| ATOM | 12747 | CA  | ALA A 525 | 38.362 | 5.726  | -4.812  | 1.00 | 0.00 | C | C |
| ATOM | 12748 | CB  | ALA A 525 | 37.072 | 6.509  | -5.103  | 1.00 | 0.00 | C | C |

|      |       |     |           |        |        |        |      |      |   |   |
|------|-------|-----|-----------|--------|--------|--------|------|------|---|---|
| ATOM | 12749 | C   | ALA A 525 | 38.218 | 5.123  | -3.452 | 1.00 | 0.00 | C | C |
| ATOM | 12750 | O   | ALA A 525 | 38.720 | 5.664  | -2.468 | 1.00 | 0.00 | C | O |
| ATOM | 12751 | N   | THR A 526 | 37.519 | 3.976  | -3.352 | 1.00 | 0.00 | C | N |
| ATOM | 12752 | CA  | THR A 526 | 37.318 | 3.402  | -2.057 | 1.00 | 0.00 | C | C |
| ATOM | 12753 | CB  | THR A 526 | 36.381 | 2.223  | -2.040 | 1.00 | 0.00 | C | C |
| ATOM | 12754 | OG1 | THR A 526 | 36.933 | 1.119  | -2.738 | 1.00 | 0.00 | C | O |
| ATOM | 12755 | CG2 | THR A 526 | 35.054 | 2.650  | -2.694 | 1.00 | 0.00 | C | C |
| ATOM | 12756 | C   | THR A 526 | 38.632 | 2.958  | -1.492 | 1.00 | 0.00 | C | C |
| ATOM | 12757 | O   | THR A 526 | 38.884 | 3.136  | -0.301 | 1.00 | 0.00 | C | O |
| ATOM | 12758 | N   | VAL A 527 | 39.516 | 2.378  | -2.329 | 1.00 | 0.00 | C | N |
| ATOM | 12759 | CA  | VAL A 527 | 40.754 | 1.847  | -1.822 | 1.00 | 0.00 | C | C |
| ATOM | 12760 | CB  | VAL A 527 | 41.585 | 1.106  | -2.837 | 1.00 | 0.00 | C | C |
| ATOM | 12761 | CG1 | VAL A 527 | 40.728 | -0.023 | -3.434 | 1.00 | 0.00 | C | C |
| ATOM | 12762 | CG2 | VAL A 527 | 42.178 | 2.090  | -3.853 | 1.00 | 0.00 | C | C |
| ATOM | 12763 | C   | VAL A 527 | 41.593 | 2.947  | -1.248 | 1.00 | 0.00 | C | C |
| ATOM | 12764 | O   | VAL A 527 | 42.203 | 2.778  | -0.193 | 1.00 | 0.00 | C | O |
| ATOM | 12765 | N   | VAL A 528 | 41.655 | 4.111  | -1.919 | 1.00 | 0.00 | C | N |
| ATOM | 12766 | CA  | VAL A 528 | 42.464 | 5.165  | -1.383 | 1.00 | 0.00 | C | C |
| ATOM | 12767 | CB  | VAL A 528 | 42.503 | 6.398  | -2.246 | 1.00 | 0.00 | C | C |
| ATOM | 12768 | CG1 | VAL A 528 | 43.102 | 6.016  | -3.610 | 1.00 | 0.00 | C | C |
| ATOM | 12769 | CG2 | VAL A 528 | 41.101 | 7.018  | -2.327 | 1.00 | 0.00 | C | C |
| ATOM | 12770 | C   | VAL A 528 | 41.882 | 5.530  | -0.059 | 1.00 | 0.00 | C | C |
| ATOM | 12771 | O   | VAL A 528 | 42.604 | 5.788  | 0.901  | 1.00 | 0.00 | C | O |
| ATOM | 12772 | N   | LEU A 529 | 40.540 | 5.544  | 0.014  | 1.00 | 0.00 | C | N |
| ATOM | 12773 | CA  | LEU A 529 | 39.823 | 5.890  | 1.203  | 1.00 | 0.00 | C | C |
| ATOM | 12774 | CB  | LEU A 529 | 38.302 | 5.970  | 0.987  | 1.00 | 0.00 | C | C |
| ATOM | 12775 | CG  | LEU A 529 | 37.867 | 7.078  | 0.007  | 1.00 | 0.00 | C | C |
| ATOM | 12776 | CD1 | LEU A 529 | 36.337 | 7.129  | -0.139 | 1.00 | 0.00 | C | C |
| ATOM | 12777 | CD2 | LEU A 529 | 38.473 | 8.436  | 0.396  | 1.00 | 0.00 | C | C |
| ATOM | 12778 | C   | LEU A 529 | 40.088 | 4.860  | 2.250  | 1.00 | 0.00 | C | C |
| ATOM | 12779 | O   | LEU A 529 | 40.091 | 5.190  | 3.425  | 1.00 | 0.00 | C | O |
| ATOM | 12780 | N   | TYR A 530 | 40.277 | 3.584  | 1.874  | 1.00 | 0.00 | C | N |
| ATOM | 12781 | CA  | TYR A 530 | 40.517 | 2.494  | 2.787  | 1.00 | 0.00 | C | C |
| ATOM | 12782 | CB  | TYR A 530 | 40.640 | 1.182  | 1.987  | 1.00 | 0.00 | C | C |
| ATOM | 12783 | CG  | TYR A 530 | 40.520 | -0.033 | 2.842  | 1.00 | 0.00 | C | C |
| ATOM | 12784 | CD1 | TYR A 530 | 39.277 | -0.553 | 3.123  | 1.00 | 0.00 | C | C |
| ATOM | 12785 | CE1 | TYR A 530 | 39.142 | -1.683 | 3.896  | 1.00 | 0.00 | C | C |
| ATOM | 12786 | CZ  | TYR A 530 | 40.259 | -2.304 | 4.393  | 1.00 | 0.00 | C | C |

|      |       |     |     |   |     |        |        |        |      |      |   |   |
|------|-------|-----|-----|---|-----|--------|--------|--------|------|------|---|---|
| ATOM | 12787 | OH  | TYR | A | 530 | 40.124 | -3.462 | 5.187  | 1.00 | 0.00 | C | O |
| ATOM | 12788 | CD2 | TYR | A | 530 | 41.635 | -0.669 | 3.336  | 1.00 | 0.00 | C | C |
| ATOM | 12789 | CE2 | TYR | A | 530 | 41.507 | -1.798 | 4.111  | 1.00 | 0.00 | C | C |
| ATOM | 12790 | C   | TYR | A | 530 | 41.821 | 2.765  | 3.471  | 1.00 | 0.00 | C | C |
| ATOM | 12791 | O   | TYR | A | 530 | 41.962 | 2.580  | 4.680  | 1.00 | 0.00 | C | O |
| ATOM | 12792 | N   | PHE | A | 531 | 42.824 | 3.217  | 2.696  | 1.00 | 0.00 | C | N |
| ATOM | 12793 | CA  | PHE | A | 531 | 44.096 | 3.540  | 3.265  | 1.00 | 0.00 | C | C |
| ATOM | 12794 | CB  | PHE | A | 531 | 45.165 | 3.926  | 2.230  | 1.00 | 0.00 | C | C |
| ATOM | 12795 | CG  | PHE | A | 531 | 45.605 | 2.647  | 1.619  | 1.00 | 0.00 | C | C |
| ATOM | 12796 | CD1 | PHE | A | 531 | 46.384 | 1.787  | 2.356  | 1.00 | 0.00 | C | C |
| ATOM | 12797 | CE1 | PHE | A | 531 | 46.810 | 0.595  | 1.822  | 1.00 | 0.00 | C | C |
| ATOM | 12798 | CZ  | PHE | A | 531 | 46.458 | 0.258  | 0.539  | 1.00 | 0.00 | C | C |
| ATOM | 12799 | CD2 | PHE | A | 531 | 45.258 | 2.308  | 0.332  | 1.00 | 0.00 | C | C |
| ATOM | 12800 | CE2 | PHE | A | 531 | 45.682 | 1.115  | -0.205 | 1.00 | 0.00 | C | C |
| ATOM | 12801 | C   | PHE | A | 531 | 43.913 | 4.684  | 4.203  | 1.00 | 0.00 | C | C |
| ATOM | 12802 | O   | PHE | A | 531 | 44.500 | 4.705  | 5.283  | 1.00 | 0.00 | C | O |
| ATOM | 12803 | N   | SER | A | 532 | 43.101 | 5.681  | 3.801  | 1.00 | 0.00 | C | N |
| ATOM | 12804 | CA  | SER | A | 532 | 42.863 | 6.792  | 4.673  | 1.00 | 0.00 | C | C |
| ATOM | 12805 | CB  | SER | A | 532 | 42.156 | 7.988  | 3.999  | 1.00 | 0.00 | C | C |
| ATOM | 12806 | OG  | SER | A | 532 | 40.862 | 7.636  | 3.536  | 1.00 | 0.00 | C | O |
| ATOM | 12807 | C   | SER | A | 532 | 42.036 | 6.293  | 5.817  | 1.00 | 0.00 | C | C |
| ATOM | 12808 | O   | SER | A | 532 | 41.952 | 6.931  | 6.863  | 1.00 | 0.00 | C | O |
| ATOM | 12809 | N   | HSD | A | 533 | 41.413 | 5.120  | 5.607  | 1.00 | 0.00 | C | N |
| ATOM | 12810 | CA  | HSD | A | 533 | 40.567 | 4.365  | 6.483  | 1.00 | 0.00 | C | C |
| ATOM | 12811 | CB  | HSD | A | 533 | 41.308 | 3.750  | 7.687  | 1.00 | 0.00 | C | C |
| ATOM | 12812 | ND1 | HSD | A | 533 | 41.216 | 5.475  | 9.549  | 1.00 | 0.00 | C | N |
| ATOM | 12813 | CG  | HSD | A | 533 | 41.923 | 4.766  | 8.603  | 1.00 | 0.00 | C | C |
| ATOM | 12814 | CE1 | HSD | A | 533 | 42.106 | 6.295  | 10.166 | 1.00 | 0.00 | C | C |
| ATOM | 12815 | NE2 | HSD | A | 533 | 43.329 | 6.160  | 9.685  | 1.00 | 0.00 | C | N |
| ATOM | 12816 | CD2 | HSD | A | 533 | 43.211 | 5.196  | 8.697  | 1.00 | 0.00 | C | C |
| ATOM | 12817 | C   | HSD | A | 533 | 39.388 | 5.149  | 6.979  | 1.00 | 0.00 | C | C |
| ATOM | 12818 | O   | HSD | A | 533 | 38.950 | 4.939  | 8.102  | 1.00 | 0.00 | C | O |
| ATOM | 12819 | N   | LEU | A | 534 | 38.801 | 6.049  | 6.167  | 1.00 | 0.00 | C | N |
| ATOM | 12820 | CA  | LEU | A | 534 | 37.631 | 6.747  | 6.637  | 1.00 | 0.00 | C | C |
| ATOM | 12821 | CB  | LEU | A | 534 | 37.339 | 8.049  | 5.873  | 1.00 | 0.00 | C | C |
| ATOM | 12822 | CG  | LEU | A | 534 | 38.471 | 9.088  | 6.003  | 1.00 | 0.00 | C | C |
| ATOM | 12823 | CD1 | LEU | A | 534 | 38.128 | 10.391 | 5.266  | 1.00 | 0.00 | C | C |
| ATOM | 12824 | CD2 | LEU | A | 534 | 38.855 | 9.314  | 7.474  | 1.00 | 0.00 | C | C |

|      |       |     |           |        |        |        |      |      |   |   |
|------|-------|-----|-----------|--------|--------|--------|------|------|---|---|
| ATOM | 12825 | C   | LEU A 534 | 36.464 | 5.830  | 6.449  | 1.00 | 0.00 | C | C |
| ATOM | 12826 | O   | LEU A 534 | 36.419 | 5.080  | 5.482  | 1.00 | 0.00 | C | O |
| ATOM | 12827 | N   | LYS A 535 | 35.480 | 5.881  | 7.365  | 1.00 | 0.00 | C | N |
| ATOM | 12828 | CA  | LYS A 535 | 34.327 | 5.018  | 7.359  | 1.00 | 0.00 | C | C |
| ATOM | 12829 | CB  | LYS A 535 | 33.429 | 5.240  | 8.583  | 1.00 | 0.00 | C | C |
| ATOM | 12830 | CG  | LYS A 535 | 34.063 | 4.783  | 9.898  | 1.00 | 0.00 | C | C |
| ATOM | 12831 | CD  | LYS A 535 | 33.361 | 5.323  | 11.144 | 1.00 | 0.00 | C | C |
| ATOM | 12832 | CE  | LYS A 535 | 31.854 | 5.063  | 11.167 | 1.00 | 0.00 | C | C |
| ATOM | 12833 | NZ  | LYS A 535 | 31.167 | 5.997  | 10.246 | 1.00 | 0.00 | C | N |
| ATOM | 12834 | C   | LYS A 535 | 33.496 | 5.261  | 6.135  | 1.00 | 0.00 | C | C |
| ATOM | 12835 | O   | LYS A 535 | 32.912 | 4.332  | 5.580  | 1.00 | 0.00 | C | O |
| ATOM | 12836 | N   | GLU A 536 | 33.437 | 6.519  | 5.671  | 1.00 | 0.00 | C | N |
| ATOM | 12837 | CA  | GLU A 536 | 32.598 | 6.894  | 4.566  | 1.00 | 0.00 | C | C |
| ATOM | 12838 | CB  | GLU A 536 | 32.602 | 8.393  | 4.228  | 1.00 | 0.00 | C | C |
| ATOM | 12839 | CG  | GLU A 536 | 31.727 | 9.236  | 5.153  | 1.00 | 0.00 | C | C |
| ATOM | 12840 | CD  | GLU A 536 | 31.466 | 10.555 | 4.440  | 1.00 | 0.00 | C | C |
| ATOM | 12841 | OE1 | GLU A 536 | 32.337 | 10.966 | 3.625  | 1.00 | 0.00 | C | O |
| ATOM | 12842 | OE2 | GLU A 536 | 30.394 | 11.164 | 4.693  | 1.00 | 0.00 | C | O |
| ATOM | 12843 | C   | GLU A 536 | 33.003 | 6.163  | 3.330  | 1.00 | 0.00 | C | C |
| ATOM | 12844 | O   | GLU A 536 | 32.225 | 6.067  | 2.382  | 1.00 | 0.00 | C | O |
| ATOM | 12845 | N   | TYR A 537 | 34.235 | 5.629  | 3.296  | 1.00 | 0.00 | C | N |
| ATOM | 12846 | CA  | TYR A 537 | 34.762 | 5.032  | 2.102  | 1.00 | 0.00 | C | C |
| ATOM | 12847 | CB  | TYR A 537 | 36.161 | 4.411  | 2.282  | 1.00 | 0.00 | C | C |
| ATOM | 12848 | CG  | TYR A 537 | 36.066 | 3.020  | 2.819  | 1.00 | 0.00 | C | C |
| ATOM | 12849 | CD1 | TYR A 537 | 35.913 | 2.762  | 4.158  | 1.00 | 0.00 | C | C |
| ATOM | 12850 | CE1 | TYR A 537 | 35.832 | 1.478  | 4.641  | 1.00 | 0.00 | C | C |
| ATOM | 12851 | CZ  | TYR A 537 | 35.903 | 0.425  | 3.764  | 1.00 | 0.00 | C | C |
| ATOM | 12852 | OH  | TYR A 537 | 35.824 | -0.900 | 4.243  | 1.00 | 0.00 | C | O |
| ATOM | 12853 | CD2 | TYR A 537 | 36.128 | 1.955  | 1.952  | 1.00 | 0.00 | C | C |
| ATOM | 12854 | CE2 | TYR A 537 | 36.051 | 0.666  | 2.420  | 1.00 | 0.00 | C | C |
| ATOM | 12855 | C   | TYR A 537 | 33.836 | 3.942  | 1.651  | 1.00 | 0.00 | C | C |
| ATOM | 12856 | O   | TYR A 537 | 33.637 | 3.751  | 0.452  | 1.00 | 0.00 | C | O |
| ATOM | 12857 | N   | VAL A 538 | 33.221 | 3.211  | 2.596  | 1.00 | 0.00 | C | N |
| ATOM | 12858 | CA  | VAL A 538 | 32.410 | 2.076  | 2.250  | 1.00 | 0.00 | C | C |
| ATOM | 12859 | CB  | VAL A 538 | 31.742 | 1.452  | 3.438  | 1.00 | 0.00 | C | C |
| ATOM | 12860 | CG1 | VAL A 538 | 30.715 | 2.444  | 4.009  | 1.00 | 0.00 | C | C |
| ATOM | 12861 | CG2 | VAL A 538 | 31.146 | 0.099  | 3.007  | 1.00 | 0.00 | C | C |
| ATOM | 12862 | C   | VAL A 538 | 31.349 | 2.450  | 1.262  | 1.00 | 0.00 | C | C |

|      |       |     |           |        |        |        |      |      |   |   |
|------|-------|-----|-----------|--------|--------|--------|------|------|---|---|
| ATOM | 12863 | O   | VAL A 538 | 31.162 | 1.724  | 0.286  | 1.00 | 0.00 | C | O |
| ATOM | 12864 | N   | ALA A 539 | 30.681 | 3.610  | 1.433  | 1.00 | 0.00 | C | N |
| ATOM | 12865 | CA  | ALA A 539 | 29.571 | 3.964  | 0.588  | 1.00 | 0.00 | C | C |
| ATOM | 12866 | CB  | ALA A 539 | 29.026 | 5.379  | 0.862  | 1.00 | 0.00 | C | C |
| ATOM | 12867 | C   | ALA A 539 | 30.026 | 3.934  | -0.837 | 1.00 | 0.00 | C | C |
| ATOM | 12868 | O   | ALA A 539 | 29.291 | 3.488  | -1.717 | 1.00 | 0.00 | C | O |
| ATOM | 12869 | N   | SER A 540 | 31.260 | 4.393  | -1.101 | 1.00 | 0.00 | C | N |
| ATOM | 12870 | CA  | SER A 540 | 31.782 | 4.386  | -2.439 | 1.00 | 0.00 | C | C |
| ATOM | 12871 | CB  | SER A 540 | 33.186 | 5.008  | -2.527 | 1.00 | 0.00 | C | C |
| ATOM | 12872 | OG  | SER A 540 | 33.132 | 6.382  | -2.175 | 1.00 | 0.00 | C | O |
| ATOM | 12873 | C   | SER A 540 | 31.895 | 2.967  | -2.915 | 1.00 | 0.00 | C | C |
| ATOM | 12874 | O   | SER A 540 | 31.594 | 2.664  | -4.070 | 1.00 | 0.00 | C | O |
| ATOM | 12875 | N   | MET A 541 | 32.337 | 2.053  | -2.031 | 1.00 | 0.00 | C | N |
| ATOM | 12876 | CA  | MET A 541 | 32.486 | 0.672  | -2.396 | 1.00 | 0.00 | C | C |
| ATOM | 12877 | CB  | MET A 541 | 33.083 | -0.205 | -1.284 | 1.00 | 0.00 | C | C |
| ATOM | 12878 | CG  | MET A 541 | 34.564 | 0.054  | -1.015 | 1.00 | 0.00 | C | C |
| ATOM | 12879 | SD  | MET A 541 | 35.321 | -1.181 | 0.080  | 1.00 | 0.00 | C | S |
| ATOM | 12880 | CE  | MET A 541 | 35.134 | -2.548 | -1.103 | 1.00 | 0.00 | C | C |
| ATOM | 12881 | C   | MET A 541 | 31.137 | 0.108  | -2.709 | 1.00 | 0.00 | C | C |
| ATOM | 12882 | O   | MET A 541 | 30.987 | -0.688 | -3.635 | 1.00 | 0.00 | C | O |
| ATOM | 12883 | N   | VAL A 542 | 30.112 | 0.526  | -1.944 | 1.00 | 0.00 | C | N |
| ATOM | 12884 | CA  | VAL A 542 | 28.787 | 0.007  | -2.119 | 1.00 | 0.00 | C | C |
| ATOM | 12885 | CB  | VAL A 542 | 27.775 | 0.677  | -1.236 | 1.00 | 0.00 | C | C |
| ATOM | 12886 | CG1 | VAL A 542 | 26.379 | 0.167  | -1.628 | 1.00 | 0.00 | C | C |
| ATOM | 12887 | CG2 | VAL A 542 | 28.139 | 0.413  | 0.234  | 1.00 | 0.00 | C | C |
| ATOM | 12888 | C   | VAL A 542 | 28.377 | 0.278  | -3.527 | 1.00 | 0.00 | C | C |
| ATOM | 12889 | O   | VAL A 542 | 27.784 | -0.579 | -4.183 | 1.00 | 0.00 | C | O |
| ATOM | 12890 | N   | PHE A 543 | 28.690 | 1.481  | -4.039 | 1.00 | 0.00 | C | N |
| ATOM | 12891 | CA  | PHE A 543 | 28.361 | 1.766  | -5.406 | 1.00 | 0.00 | C | C |
| ATOM | 12892 | CB  | PHE A 543 | 28.842 | 3.142  | -5.908 | 1.00 | 0.00 | C | C |
| ATOM | 12893 | CG  | PHE A 543 | 27.788 | 4.159  | -5.679 | 1.00 | 0.00 | C | C |
| ATOM | 12894 | CD1 | PHE A 543 | 27.583 | 4.730  | -4.446 | 1.00 | 0.00 | C | C |
| ATOM | 12895 | CE1 | PHE A 543 | 26.595 | 5.674  | -4.282 | 1.00 | 0.00 | C | C |
| ATOM | 12896 | CZ  | PHE A 543 | 25.814 | 6.056  | -5.347 | 1.00 | 0.00 | C | C |
| ATOM | 12897 | CD2 | PHE A 543 | 27.006 | 4.553  | -6.741 | 1.00 | 0.00 | C | C |
| ATOM | 12898 | CE2 | PHE A 543 | 26.019 | 5.495  | -6.583 | 1.00 | 0.00 | C | C |
| ATOM | 12899 | C   | PHE A 543 | 29.074 | 0.785  | -6.273 | 1.00 | 0.00 | C | C |
| ATOM | 12900 | O   | PHE A 543 | 28.506 | 0.263  | -7.232 | 1.00 | 0.00 | C | O |



|      |       |     |           |        |        |         |      |      |   |   |
|------|-------|-----|-----------|--------|--------|---------|------|------|---|---|
| ATOM | 12901 | N   | SER A 544 | 30.345 | 0.515  | -5.951  | 1.00 | 0.00 | C | N |
| ATOM | 12902 | CA  | SER A 544 | 31.168 | -0.322 | -6.776  | 1.00 | 0.00 | C | C |
| ATOM | 12903 | CB  | SER A 544 | 32.598 | -0.461 | -6.218  | 1.00 | 0.00 | C | C |
| ATOM | 12904 | OG  | SER A 544 | 33.382 | -1.299 | -7.055  | 1.00 | 0.00 | C | O |
| ATOM | 12905 | C   | SER A 544 | 30.595 | -1.702 | -6.897  | 1.00 | 0.00 | C | C |
| ATOM | 12906 | O   | SER A 544 | 30.568 | -2.260 | -7.993  | 1.00 | 0.00 | C | O |
| ATOM | 12907 | N   | LEU A 545 | 30.130 | -2.297 | -5.785  | 1.00 | 0.00 | C | N |
| ATOM | 12908 | CA  | LEU A 545 | 29.664 | -3.658 | -5.825  | 1.00 | 0.00 | C | C |
| ATOM | 12909 | CB  | LEU A 545 | 29.272 | -4.203 | -4.446  | 1.00 | 0.00 | C | C |
| ATOM | 12910 | CG  | LEU A 545 | 28.775 | -5.659 | -4.513  | 1.00 | 0.00 | C | C |
| ATOM | 12911 | CD1 | LEU A 545 | 29.882 | -6.619 | -4.971  | 1.00 | 0.00 | C | C |
| ATOM | 12912 | CD2 | LEU A 545 | 28.135 | -6.089 | -3.188  | 1.00 | 0.00 | C | C |
| ATOM | 12913 | C   | LEU A 545 | 28.454 | -3.810 | -6.694  | 1.00 | 0.00 | C | C |
| ATOM | 12914 | O   | LEU A 545 | 28.382 | -4.745 | -7.491  | 1.00 | 0.00 | C | O |
| ATOM | 12915 | N   | ALA A 546 | 27.455 | -2.920 | -6.523  | 1.00 | 0.00 | C | N |
| ATOM | 12916 | CA  | ALA A 546 | 26.213 | -2.960 | -7.251  | 1.00 | 0.00 | C | C |
| ATOM | 12917 | CB  | ALA A 546 | 25.193 | -1.934 | -6.731  | 1.00 | 0.00 | C | C |
| ATOM | 12918 | C   | ALA A 546 | 26.442 | -2.660 | -8.699  | 1.00 | 0.00 | C | C |
| ATOM | 12919 | O   | ALA A 546 | 25.877 | -3.313 | -9.575  | 1.00 | 0.00 | C | O |
| ATOM | 12920 | N   | LEU A 547 | 27.290 | -1.656 | -8.983  | 1.00 | 0.00 | C | N |
| ATOM | 12921 | CA  | LEU A 547 | 27.511 | -1.228 | -10.331 | 1.00 | 0.00 | C | C |
| ATOM | 12922 | CB  | LEU A 547 | 28.502 | -0.054 | -10.436 | 1.00 | 0.00 | C | C |
| ATOM | 12923 | CG  | LEU A 547 | 27.995 | 1.263  | -9.815  | 1.00 | 0.00 | C | C |
| ATOM | 12924 | CD1 | LEU A 547 | 29.026 | 2.390  | -9.991  | 1.00 | 0.00 | C | C |
| ATOM | 12925 | CD2 | LEU A 547 | 26.608 | 1.639  | -10.360 | 1.00 | 0.00 | C | C |
| ATOM | 12926 | C   | LEU A 547 | 28.103 | -2.361 | -11.106 | 1.00 | 0.00 | C | C |
| ATOM | 12927 | O   | LEU A 547 | 27.733 | -2.600 | -12.254 | 1.00 | 0.00 | C | O |
| ATOM | 12928 | N   | GLY A 548 | 29.045 | -3.093 | -10.490 | 1.00 | 0.00 | C | N |
| ATOM | 12929 | CA  | GLY A 548 | 29.694 | -4.167 | -11.182 | 1.00 | 0.00 | C | C |
| ATOM | 12930 | C   | GLY A 548 | 28.684 | -5.210 | -11.547 | 1.00 | 0.00 | C | C |
| ATOM | 12931 | O   | GLY A 548 | 28.713 | -5.748 | -12.652 | 1.00 | 0.00 | C | O |
| ATOM | 12932 | N   | TRP A 549 | 27.756 | -5.528 | -10.624 | 1.00 | 0.00 | C | N |
| ATOM | 12933 | CA  | TRP A 549 | 26.789 | -6.545 | -10.920 | 1.00 | 0.00 | C | C |
| ATOM | 12934 | CB  | TRP A 549 | 25.849 | -6.887 | -9.752  | 1.00 | 0.00 | C | C |
| ATOM | 12935 | CG  | TRP A 549 | 26.482 | -7.795 | -8.731  | 1.00 | 0.00 | C | C |
| ATOM | 12936 | CD1 | TRP A 549 | 26.901 | -7.560 | -7.453  | 1.00 | 0.00 | C | C |
| ATOM | 12937 | NE1 | TRP A 549 | 27.441 | -8.706 | -6.920  | 1.00 | 0.00 | C | N |
| ATOM | 12938 | CE2 | TRP A 549 | 27.378 | -9.705 | -7.870  | 1.00 | 0.00 | C | C |

|      |       |               |        |         |         |      |      |   |   |
|------|-------|---------------|--------|---------|---------|------|------|---|---|
| ATOM | 12939 | CD2 TRP A 549 | 26.786 | -9.169  | -9.015  | 1.00 | 0.00 | C | C |
| ATOM | 12940 | CE3 TRP A 549 | 26.590 | -9.917  | -10.138 | 1.00 | 0.00 | C | C |
| ATOM | 12941 | CZ3 TRP A 549 | 26.996 | -11.232 | -10.098 | 1.00 | 0.00 | C | C |
| ATOM | 12942 | CZ2 TRP A 549 | 27.785 | -11.009 | -7.835  | 1.00 | 0.00 | C | C |
| ATOM | 12943 | CH2 TRP A 549 | 27.581 | -11.766 | -8.968  | 1.00 | 0.00 | C | C |
| ATOM | 12944 | C TRP A 549   | 25.949 | -6.126  | -12.082 | 1.00 | 0.00 | C | C |
| ATOM | 12945 | O TRP A 549   | 25.700 | -6.921  | -12.986 | 1.00 | 0.00 | C | O |
| ATOM | 12946 | N THR A 550   | 25.508 | -4.859  | -12.105 | 1.00 | 0.00 | C | N |
| ATOM | 12947 | CA THR A 550  | 24.655 | -4.417  | -13.170 | 1.00 | 0.00 | C | C |
| ATOM | 12948 | CB THR A 550  | 24.221 | -2.989  | -13.013 | 1.00 | 0.00 | C | C |
| ATOM | 12949 | OG1 THR A 550 | 25.331 | -2.112  | -13.126 | 1.00 | 0.00 | C | O |
| ATOM | 12950 | CG2 THR A 550 | 23.581 | -2.842  | -11.622 | 1.00 | 0.00 | C | C |
| ATOM | 12951 | C THR A 550   | 25.416 | -4.550  | -14.455 | 1.00 | 0.00 | C | C |
| ATOM | 12952 | O THR A 550   | 24.852 | -4.905  | -15.487 | 1.00 | 0.00 | C | O |
| ATOM | 12953 | N ASN A 551   | 26.731 | -4.269  | -14.410 | 1.00 | 0.00 | C | N |
| ATOM | 12954 | CA ASN A 551  | 27.600 | -4.324  | -15.556 | 1.00 | 0.00 | C | C |
| ATOM | 12955 | CB ASN A 551  | 29.043 | -3.895  | -15.239 | 1.00 | 0.00 | C | C |
| ATOM | 12956 | CG ASN A 551  | 29.070 | -2.408  | -14.924 | 1.00 | 0.00 | C | C |
| ATOM | 12957 | OD1 ASN A 551 | 28.127 | -1.675  | -15.219 | 1.00 | 0.00 | C | O |
| ATOM | 12958 | ND2 ASN A 551 | 30.193 | -1.942  | -14.313 | 1.00 | 0.00 | C | N |
| ATOM | 12959 | C ASN A 551   | 27.682 | -5.736  | -16.066 | 1.00 | 0.00 | C | C |
| ATOM | 12960 | O ASN A 551   | 27.793 | -5.961  | -17.272 | 1.00 | 0.00 | C | O |
| ATOM | 12961 | N MET A 552   | 27.597 | -6.725  | -15.160 | 1.00 | 0.00 | C | N |
| ATOM | 12962 | CA MET A 552  | 27.804 | -8.117  | -15.470 | 1.00 | 0.00 | C | C |
| ATOM | 12963 | CB MET A 552  | 27.668 | -9.030  | -14.240 | 1.00 | 0.00 | C | C |
| ATOM | 12964 | CG MET A 552  | 28.200 | -10.442 | -14.494 | 1.00 | 0.00 | C | C |
| ATOM | 12965 | SD MET A 552  | 28.074 | -11.579 | -13.084 | 1.00 | 0.00 | C | S |
| ATOM | 12966 | CE MET A 552  | 26.334 | -12.008 | -13.353 | 1.00 | 0.00 | C | C |
| ATOM | 12967 | C MET A 552   | 26.807 | -8.586  | -16.488 | 1.00 | 0.00 | C | C |
| ATOM | 12968 | O MET A 552   | 27.093 | -9.476  | -17.287 | 1.00 | 0.00 | C | O |
| ATOM | 12969 | N LEU A 553   | 25.609 | -7.983  | -16.490 | 1.00 | 0.00 | C | N |
| ATOM | 12970 | CA LEU A 553  | 24.490 | -8.361  | -17.315 | 1.00 | 0.00 | C | C |
| ATOM | 12971 | CB LEU A 553  | 23.331 | -7.363  | -17.193 | 1.00 | 0.00 | C | C |
| ATOM | 12972 | CG LEU A 553  | 22.983 | -7.010  | -15.741 | 1.00 | 0.00 | C | C |
| ATOM | 12973 | CD1 LEU A 553 | 21.653 | -6.242  | -15.659 | 1.00 | 0.00 | C | C |
| ATOM | 12974 | CD2 LEU A 553 | 23.070 | -8.236  | -14.825 | 1.00 | 0.00 | C | C |
| ATOM | 12975 | C LEU A 553   | 24.894 | -8.290  | -18.764 | 1.00 | 0.00 | C | C |
| ATOM | 12976 | O LEU A 553   | 24.341 | -8.988  | -19.612 | 1.00 | 0.00 | C | O |

|            |     |           |        |         |         |      |      |   |   |
|------------|-----|-----------|--------|---------|---------|------|------|---|---|
| ATOM 12977 | N   | TYR A 554 | 25.857 | -7.406  | -19.066 | 1.00 | 0.00 | C | N |
| ATOM 12978 | CA  | TYR A 554 | 26.373 | -7.080  | -20.370 | 1.00 | 0.00 | C | C |
| ATOM 12979 | CB  | TYR A 554 | 27.454 | -5.986  | -20.231 | 1.00 | 0.00 | C | C |
| ATOM 12980 | CG  | TYR A 554 | 28.539 | -6.115  | -21.244 | 1.00 | 0.00 | C | C |
| ATOM 12981 | CD1 | TYR A 554 | 28.356 | -5.850  | -22.581 | 1.00 | 0.00 | C | C |
| ATOM 12982 | CE1 | TYR A 554 | 29.411 | -5.977  | -23.461 | 1.00 | 0.00 | C | C |
| ATOM 12983 | CZ  | TYR A 554 | 30.654 | -6.359  | -23.013 | 1.00 | 0.00 | C | C |
| ATOM 12984 | OH  | TYR A 554 | 31.734 | -6.488  | -23.911 | 1.00 | 0.00 | C | O |
| ATOM 12985 | CD2 | TYR A 554 | 29.790 | -6.485  | -20.807 | 1.00 | 0.00 | C | C |
| ATOM 12986 | CE2 | TYR A 554 | 30.845 | -6.612  | -21.678 | 1.00 | 0.00 | C | C |
| ATOM 12987 | C   | TYR A 554 | 26.935 | -8.269  | -21.105 | 1.00 | 0.00 | C | C |
| ATOM 12988 | O   | TYR A 554 | 26.743 | -8.392  | -22.314 | 1.00 | 0.00 | C | O |
| ATOM 12989 | N   | TYR A 555 | 27.602 | -9.196  | -20.401 | 1.00 | 0.00 | C | N |
| ATOM 12990 | CA  | TYR A 555 | 28.259 | -10.315 | -21.023 | 1.00 | 0.00 | C | C |
| ATOM 12991 | CB  | TYR A 555 | 28.959 | -11.278 | -20.042 | 1.00 | 0.00 | C | C |
| ATOM 12992 | CG  | TYR A 555 | 30.301 | -10.726 | -19.699 | 1.00 | 0.00 | C | C |
| ATOM 12993 | CD1 | TYR A 555 | 31.359 | -10.949 | -20.554 | 1.00 | 0.00 | C | C |
| ATOM 12994 | CE1 | TYR A 555 | 32.611 | -10.464 | -20.274 | 1.00 | 0.00 | C | C |
| ATOM 12995 | CZ  | TYR A 555 | 32.822 | -9.743  | -19.124 | 1.00 | 0.00 | C | C |
| ATOM 12996 | OH  | TYR A 555 | 34.111 | -9.245  | -18.837 | 1.00 | 0.00 | C | O |
| ATOM 12997 | CD2 | TYR A 555 | 30.522 | -10.005 | -18.547 | 1.00 | 0.00 | C | C |
| ATOM 12998 | CE2 | TYR A 555 | 31.776 | -9.513  | -18.261 | 1.00 | 0.00 | C | C |
| ATOM 12999 | C   | TYR A 555 | 27.301 | -11.110 | -21.843 | 1.00 | 0.00 | C | C |
| ATOM 13000 | O   | TYR A 555 | 27.700 | -11.765 | -22.801 | 1.00 | 0.00 | C | O |
| ATOM 13001 | N   | THR A 556 | 26.017 | -11.113 | -21.478 | 1.00 | 0.00 | C | N |
| ATOM 13002 | CA  | THR A 556 | 25.049 | -11.907 | -22.169 | 1.00 | 0.00 | C | C |
| ATOM 13003 | CB  | THR A 556 | 23.702 | -11.836 | -21.528 | 1.00 | 0.00 | C | C |
| ATOM 13004 | OG1 | THR A 556 | 23.819 | -12.104 | -20.138 | 1.00 | 0.00 | C | O |
| ATOM 13005 | CG2 | THR A 556 | 22.849 | -12.948 | -22.151 | 1.00 | 0.00 | C | C |
| ATOM 13006 | C   | THR A 556 | 24.962 | -11.448 | -23.600 | 1.00 | 0.00 | C | C |
| ATOM 13007 | O   | THR A 556 | 24.485 | -12.179 | -24.463 | 1.00 | 0.00 | C | O |
| ATOM 13008 | N   | ARG A 557 | 25.395 | -10.208 | -23.900 | 1.00 | 0.00 | C | N |
| ATOM 13009 | CA  | ARG A 557 | 25.292 | -9.644  | -25.222 | 1.00 | 0.00 | C | C |
| ATOM 13010 | CB  | ARG A 557 | 25.932 | -8.246  | -25.322 | 1.00 | 0.00 | C | C |
| ATOM 13011 | CG  | ARG A 557 | 25.189 | -7.198  | -24.488 | 1.00 | 0.00 | C | C |
| ATOM 13012 | CD  | ARG A 557 | 25.894 | -5.842  | -24.385 | 1.00 | 0.00 | C | C |
| ATOM 13013 | NE  | ARG A 557 | 25.699 | -5.114  | -25.670 | 1.00 | 0.00 | C | N |
| ATOM 13014 | CZ  | ARG A 557 | 25.674 | -3.750  | -25.697 | 1.00 | 0.00 | C | C |

|      |       |     |     |       |        |         |         |      |      |   |   |
|------|-------|-----|-----|-------|--------|---------|---------|------|------|---|---|
| ATOM | 13015 | NH1 | ARG | A 557 | 25.788 | -3.023  | -24.545 | 1.00 | 0.00 | C | N |
| ATOM | 13016 | NH2 | ARG | A 557 | 25.528 | -3.104  | -26.891 | 1.00 | 0.00 | C | N |
| ATOM | 13017 | C   | ARG | A 557 | 25.912 | -10.527 | -26.269 | 1.00 | 0.00 | C | C |
| ATOM | 13018 | O   | ARG | A 557 | 26.914 | -11.209 | -26.044 | 1.00 | 0.00 | C | O |
| ATOM | 13019 | N   | GLY | A 558 | 25.310 | -10.483 | -27.477 | 1.00 | 0.00 | C | N |
| ATOM | 13020 | CA  | GLY | A 558 | 25.700 | -11.293 | -28.594 | 1.00 | 0.00 | C | C |
| ATOM | 13021 | C   | GLY | A 558 | 24.724 | -12.424 | -28.733 | 1.00 | 0.00 | C | C |
| ATOM | 13022 | O   | GLY | A 558 | 24.883 | -13.279 | -29.603 | 1.00 | 0.00 | C | O |
| ATOM | 13023 | N   | PHE | A 559 | 23.685 | -12.470 | -27.875 | 1.00 | 0.00 | C | N |
| ATOM | 13024 | CA  | PHE | A 559 | 22.700 | -13.512 | -27.984 | 1.00 | 0.00 | C | C |
| ATOM | 13025 | CB  | PHE | A 559 | 22.471 | -14.254 | -26.655 | 1.00 | 0.00 | C | C |
| ATOM | 13026 | CG  | PHE | A 559 | 23.729 | -15.031 | -26.445 | 1.00 | 0.00 | C | C |
| ATOM | 13027 | CD1 | PHE | A 559 | 24.864 | -14.404 | -25.988 | 1.00 | 0.00 | C | C |
| ATOM | 13028 | CE1 | PHE | A 559 | 26.039 | -15.088 | -25.799 | 1.00 | 0.00 | C | C |
| ATOM | 13029 | CZ  | PHE | A 559 | 26.086 | -16.429 | -26.086 | 1.00 | 0.00 | C | C |
| ATOM | 13030 | CD2 | PHE | A 559 | 23.795 | -16.371 | -26.748 | 1.00 | 0.00 | C | C |
| ATOM | 13031 | CE2 | PHE | A 559 | 24.966 | -17.070 | -26.562 | 1.00 | 0.00 | C | C |
| ATOM | 13032 | C   | PHE | A 559 | 21.454 | -12.867 | -28.477 | 1.00 | 0.00 | C | C |
| ATOM | 13033 | O   | PHE | A 559 | 21.147 | -11.747 | -28.106 | 1.00 | 0.00 | C | O |
| ATOM | 13034 | N   | GLN | A 560 | 20.697 | -13.517 | -29.371 | 1.00 | 0.00 | C | N |
| ATOM | 13035 | CA  | GLN | A 560 | 19.592 | -12.848 | -29.991 | 1.00 | 0.00 | C | C |
| ATOM | 13036 | CB  | GLN | A 560 | 18.869 | -13.743 | -31.011 | 1.00 | 0.00 | C | C |
| ATOM | 13037 | CG  | GLN | A 560 | 19.710 | -14.166 | -32.217 | 1.00 | 0.00 | C | C |
| ATOM | 13038 | CD  | GLN | A 560 | 20.547 | -15.398 | -31.884 | 1.00 | 0.00 | C | C |
| ATOM | 13039 | OE1 | GLN | A 560 | 20.812 | -15.741 | -30.734 | 1.00 | 0.00 | C | O |
| ATOM | 13040 | NE2 | GLN | A 560 | 20.982 | -16.104 | -32.962 | 1.00 | 0.00 | C | N |
| ATOM | 13041 | C   | GLN | A 560 | 18.559 | -12.458 | -28.982 | 1.00 | 0.00 | C | C |
| ATOM | 13042 | O   | GLN | A 560 | 18.085 | -11.324 | -28.975 | 1.00 | 0.00 | C | O |
| ATOM | 13043 | N   | GLN | A 561 | 18.159 | -13.392 | -28.106 | 1.00 | 0.00 | C | N |
| ATOM | 13044 | CA  | GLN | A 561 | 17.143 | -13.048 | -27.154 | 1.00 | 0.00 | C | C |
| ATOM | 13045 | CB  | GLN | A 561 | 16.712 | -14.253 | -26.298 | 1.00 | 0.00 | C | C |
| ATOM | 13046 | CG  | GLN | A 561 | 15.935 | -15.341 | -27.046 | 1.00 | 0.00 | C | C |
| ATOM | 13047 | CD  | GLN | A 561 | 14.457 | -14.990 | -26.957 | 1.00 | 0.00 | C | C |
| ATOM | 13048 | OE1 | GLN | A 561 | 14.101 | -13.832 | -26.746 | 1.00 | 0.00 | C | O |
| ATOM | 13049 | NE2 | GLN | A 561 | 13.575 | -16.014 | -27.108 | 1.00 | 0.00 | C | N |
| ATOM | 13050 | C   | GLN | A 561 | 17.691 | -12.040 | -26.192 | 1.00 | 0.00 | C | C |
| ATOM | 13051 | O   | GLN | A 561 | 17.084 | -11.002 | -25.935 | 1.00 | 0.00 | C | O |
| ATOM | 13052 | N   | MET | A 562 | 18.885 | -12.341 | -25.652 | 1.00 | 0.00 | C | N |

|      |       |     |           |        |         |         |      |      |   |   |
|------|-------|-----|-----------|--------|---------|---------|------|------|---|---|
| ATOM | 13053 | CA  | MET A 562 | 19.502 | -11.588 | -24.600 | 1.00 | 0.00 | C | C |
| ATOM | 13054 | CB  | MET A 562 | 20.750 | -12.305 | -24.093 | 1.00 | 0.00 | C | C |
| ATOM | 13055 | CG  | MET A 562 | 20.460 | -13.756 | -23.718 | 1.00 | 0.00 | C | C |
| ATOM | 13056 | SD  | MET A 562 | 19.022 | -13.962 | -22.627 | 1.00 | 0.00 | C | S |
| ATOM | 13057 | CE  | MET A 562 | 19.731 | -13.030 | -21.238 | 1.00 | 0.00 | C | C |
| ATOM | 13058 | C   | MET A 562 | 19.932 | -10.226 | -25.037 | 1.00 | 0.00 | C | C |
| ATOM | 13059 | O   | MET A 562 | 19.734 | -9.230  | -24.349 | 1.00 | 0.00 | C | O |
| ATOM | 13060 | N   | GLY A 563 | 20.528 | -10.173 | -26.226 | 1.00 | 0.00 | C | N |
| ATOM | 13061 | CA  | GLY A 563 | 21.129 | -9.026  | -26.829 | 1.00 | 0.00 | C | C |
| ATOM | 13062 | C   | GLY A 563 | 20.073 | -8.002  | -26.997 | 1.00 | 0.00 | C | C |
| ATOM | 13063 | O   | GLY A 563 | 20.315 | -6.811  | -26.827 | 1.00 | 0.00 | C | O |
| ATOM | 13064 | N   | ILE A 564 | 18.859 | -8.443  | -27.358 | 1.00 | 0.00 | C | N |
| ATOM | 13065 | CA  | ILE A 564 | 17.828 | -7.485  | -27.589 | 1.00 | 0.00 | C | C |
| ATOM | 13066 | CB  | ILE A 564 | 16.577 | -8.084  | -28.141 | 1.00 | 0.00 | C | C |
| ATOM | 13067 | CG2 | ILE A 564 | 15.555 | -6.957  | -28.362 | 1.00 | 0.00 | C | C |
| ATOM | 13068 | CG1 | ILE A 564 | 16.943 | -8.875  | -29.404 | 1.00 | 0.00 | C | C |
| ATOM | 13069 | CD  | ILE A 564 | 17.985 | -8.173  | -30.276 | 1.00 | 0.00 | C | C |
| ATOM | 13070 | C   | ILE A 564 | 17.506 | -6.774  | -26.309 | 1.00 | 0.00 | C | C |
| ATOM | 13071 | O   | ILE A 564 | 17.329 | -5.558  | -26.299 | 1.00 | 0.00 | C | O |
| ATOM | 13072 | N   | TYR A 565 | 17.429 | -7.510  | -25.187 | 1.00 | 0.00 | C | N |
| ATOM | 13073 | CA  | TYR A 565 | 17.049 | -6.902  | -23.943 | 1.00 | 0.00 | C | C |
| ATOM | 13074 | CB  | TYR A 565 | 16.793 | -7.942  | -22.841 | 1.00 | 0.00 | C | C |
| ATOM | 13075 | CG  | TYR A 565 | 15.494 | -8.565  | -23.225 | 1.00 | 0.00 | C | C |
| ATOM | 13076 | CD1 | TYR A 565 | 15.446 | -9.632  | -24.092 | 1.00 | 0.00 | C | C |
| ATOM | 13077 | CE1 | TYR A 565 | 14.240 | -10.188 | -24.445 | 1.00 | 0.00 | C | C |
| ATOM | 13078 | CZ  | TYR A 565 | 13.068 | -9.676  | -23.941 | 1.00 | 0.00 | C | C |
| ATOM | 13079 | OH  | TYR A 565 | 11.832 | -10.248 | -24.306 | 1.00 | 0.00 | C | O |
| ATOM | 13080 | CD2 | TYR A 565 | 14.314 | -8.052  | -22.733 | 1.00 | 0.00 | C | C |
| ATOM | 13081 | CE2 | TYR A 565 | 13.106 | -8.603  | -23.083 | 1.00 | 0.00 | C | C |
| ATOM | 13082 | C   | TYR A 565 | 18.055 | -5.892  | -23.480 | 1.00 | 0.00 | C | C |
| ATOM | 13083 | O   | TYR A 565 | 17.679 | -4.810  | -23.029 | 1.00 | 0.00 | C | O |
| ATOM | 13084 | N   | ALA A 566 | 19.359 | -6.199  | -23.582 | 1.00 | 0.00 | C | N |
| ATOM | 13085 | CA  | ALA A 566 | 20.344 | -5.266  | -23.107 | 1.00 | 0.00 | C | C |
| ATOM | 13086 | CB  | ALA A 566 | 21.786 | -5.769  | -23.274 | 1.00 | 0.00 | C | C |
| ATOM | 13087 | C   | ALA A 566 | 20.230 | -4.006  | -23.902 | 1.00 | 0.00 | C | C |
| ATOM | 13088 | O   | ALA A 566 | 20.289 | -2.907  | -23.355 | 1.00 | 0.00 | C | O |
| ATOM | 13089 | N   | VAL A 567 | 20.049 | -4.150  | -25.225 | 1.00 | 0.00 | C | N |
| ATOM | 13090 | CA  | VAL A 567 | 19.997 | -3.015  | -26.097 | 1.00 | 0.00 | C | C |

|      |       |               |        |        |         |      |      |   |   |
|------|-------|---------------|--------|--------|---------|------|------|---|---|
| ATOM | 13091 | CB VAL A 567  | 19.852 | -3.400 | -27.541 | 1.00 | 0.00 | C | C |
| ATOM | 13092 | CG1 VAL A 567 | 19.747 | -2.116 | -28.382 | 1.00 | 0.00 | C | C |
| ATOM | 13093 | CG2 VAL A 567 | 21.040 | -4.298 | -27.927 | 1.00 | 0.00 | C | C |
| ATOM | 13094 | C VAL A 567   | 18.828 | -2.161 | -25.716 | 1.00 | 0.00 | C | C |
| ATOM | 13095 | O VAL A 567   | 18.939 | -0.937 | -25.662 | 1.00 | 0.00 | C | O |
| ATOM | 13096 | N MET A 568   | 17.670 | -2.780 | -25.426 | 1.00 | 0.00 | C | N |
| ATOM | 13097 | CA MET A 568  | 16.510 | -1.991 | -25.122 | 1.00 | 0.00 | C | C |
| ATOM | 13098 | CB MET A 568  | 15.216 | -2.810 | -24.991 | 1.00 | 0.00 | C | C |
| ATOM | 13099 | CG MET A 568  | 15.202 | -3.811 | -23.839 | 1.00 | 0.00 | C | C |
| ATOM | 13100 | SD MET A 568  | 13.620 | -4.688 | -23.664 | 1.00 | 0.00 | C | S |
| ATOM | 13101 | CE MET A 568  | 13.715 | -5.488 | -25.292 | 1.00 | 0.00 | C | C |
| ATOM | 13102 | C MET A 568   | 16.742 | -1.237 | -23.853 | 1.00 | 0.00 | C | C |
| ATOM | 13103 | O MET A 568   | 16.348 | -0.078 | -23.731 | 1.00 | 0.00 | C | O |
| ATOM | 13104 | N ILE A 569   | 17.402 | -1.879 | -22.873 | 1.00 | 0.00 | C | N |
| ATOM | 13105 | CA ILE A 569  | 17.655 | -1.247 | -21.612 | 1.00 | 0.00 | C | C |
| ATOM | 13106 | CB ILE A 569  | 18.386 | -2.145 | -20.660 | 1.00 | 0.00 | C | C |
| ATOM | 13107 | CG2 ILE A 569 | 18.955 | -1.277 | -19.535 | 1.00 | 0.00 | C | C |
| ATOM | 13108 | CG1 ILE A 569 | 17.484 | -3.294 | -20.187 | 1.00 | 0.00 | C | C |
| ATOM | 13109 | CD ILE A 569  | 18.240 | -4.374 | -19.415 | 1.00 | 0.00 | C | C |
| ATOM | 13110 | C ILE A 569   | 18.520 | -0.053 | -21.828 | 1.00 | 0.00 | C | C |
| ATOM | 13111 | O ILE A 569   | 18.263 | 1.018  | -21.283 | 1.00 | 0.00 | C | O |
| ATOM | 13112 | N GLU A 570   | 19.573 | -0.200 | -22.643 | 1.00 | 0.00 | C | N |
| ATOM | 13113 | CA GLU A 570  | 20.458 | 0.905  | -22.845 | 1.00 | 0.00 | C | C |
| ATOM | 13114 | CB GLU A 570  | 21.710 | 0.525  | -23.631 | 1.00 | 0.00 | C | C |
| ATOM | 13115 | CG GLU A 570  | 22.662 | -0.247 | -22.725 | 1.00 | 0.00 | C | C |
| ATOM | 13116 | CD GLU A 570  | 23.601 | -1.021 | -23.613 | 1.00 | 0.00 | C | C |
| ATOM | 13117 | OE1 GLU A 570 | 24.608 | -0.432 | -24.083 | 1.00 | 0.00 | C | O |
| ATOM | 13118 | OE2 GLU A 570 | 23.310 | -2.225 | -23.838 | 1.00 | 0.00 | C | O |
| ATOM | 13119 | C GLU A 570   | 19.724 | 2.011  | -23.525 | 1.00 | 0.00 | C | C |
| ATOM | 13120 | O GLU A 570   | 19.961 | 3.179  | -23.232 | 1.00 | 0.00 | C | O |
| ATOM | 13121 | N LYS A 571   | 18.804 | 1.671  | -24.443 | 1.00 | 0.00 | C | N |
| ATOM | 13122 | CA LYS A 571  | 18.063 | 2.666  | -25.166 | 1.00 | 0.00 | C | C |
| ATOM | 13123 | CB LYS A 571  | 17.065 | 2.061  | -26.167 | 1.00 | 0.00 | C | C |
| ATOM | 13124 | CG LYS A 571  | 16.190 | 3.115  | -26.855 | 1.00 | 0.00 | C | C |
| ATOM | 13125 | CD LYS A 571  | 16.932 | 4.027  | -27.834 | 1.00 | 0.00 | C | C |
| ATOM | 13126 | CE LYS A 571  | 16.032 | 5.098  | -28.456 | 1.00 | 0.00 | C | C |
| ATOM | 13127 | NZ LYS A 571  | 16.610 | 5.573  | -29.730 | 1.00 | 0.00 | C | N |
| ATOM | 13128 | C LYS A 571   | 17.241 | 3.482  | -24.221 | 1.00 | 0.00 | C | C |

|      |       |     |           |        |        |         |      |      |   |   |
|------|-------|-----|-----------|--------|--------|---------|------|------|---|---|
| ATOM | 13129 | O   | LYS A 571 | 17.148 | 4.700  | -24.354 | 1.00 | 0.00 | C | O |
| ATOM | 13130 | N   | MET A 572 | 16.599 | 2.833  | -23.240 | 1.00 | 0.00 | C | N |
| ATOM | 13131 | CA  | MET A 572 | 15.738 | 3.586  | -22.381 | 1.00 | 0.00 | C | C |
| ATOM | 13132 | CB  | MET A 572 | 14.929 | 2.677  | -21.446 | 1.00 | 0.00 | C | C |
| ATOM | 13133 | CG  | MET A 572 | 14.018 | 1.765  | -22.269 | 1.00 | 0.00 | C | C |
| ATOM | 13134 | SD  | MET A 572 | 12.928 | 0.645  | -21.349 | 1.00 | 0.00 | C | S |
| ATOM | 13135 | CE  | MET A 572 | 12.267 | -0.081 | -22.876 | 1.00 | 0.00 | C | C |
| ATOM | 13136 | C   | MET A 572 | 16.535 | 4.566  | -21.586 | 1.00 | 0.00 | C | C |
| ATOM | 13137 | O   | MET A 572 | 16.127 | 5.718  | -21.419 | 1.00 | 0.00 | C | O |
| ATOM | 13138 | N   | ILE A 573 | 17.692 | 4.133  | -21.068 | 1.00 | 0.00 | C | N |
| ATOM | 13139 | CA  | ILE A 573 | 18.532 | 4.944  | -20.235 | 1.00 | 0.00 | C | C |
| ATOM | 13140 | CB  | ILE A 573 | 19.614 | 4.122  | -19.599 | 1.00 | 0.00 | C | C |
| ATOM | 13141 | CG2 | ILE A 573 | 20.479 | 5.047  | -18.727 | 1.00 | 0.00 | C | C |
| ATOM | 13142 | CG1 | ILE A 573 | 18.969 | 2.968  | -18.807 | 1.00 | 0.00 | C | C |
| ATOM | 13143 | CD  | ILE A 573 | 19.949 | 1.877  | -18.384 | 1.00 | 0.00 | C | C |
| ATOM | 13144 | C   | ILE A 573 | 19.160 | 6.049  | -21.023 | 1.00 | 0.00 | C | C |
| ATOM | 13145 | O   | ILE A 573 | 19.210 | 7.190  | -20.568 | 1.00 | 0.00 | C | O |
| ATOM | 13146 | N   | LEU A 574 | 19.699 | 5.754  | -22.218 | 1.00 | 0.00 | C | N |
| ATOM | 13147 | CA  | LEU A 574 | 20.334 | 6.832  | -22.905 | 1.00 | 0.00 | C | C |
| ATOM | 13148 | CB  | LEU A 574 | 21.028 | 6.341  | -24.184 | 1.00 | 0.00 | C | C |
| ATOM | 13149 | CG  | LEU A 574 | 21.999 | 5.177  | -23.901 | 1.00 | 0.00 | C | C |
| ATOM | 13150 | CD1 | LEU A 574 | 22.759 | 4.752  | -25.161 | 1.00 | 0.00 | C | C |
| ATOM | 13151 | CD2 | LEU A 574 | 22.920 | 5.478  | -22.708 | 1.00 | 0.00 | C | C |
| ATOM | 13152 | C   | LEU A 574 | 19.299 | 7.855  | -23.292 | 1.00 | 0.00 | C | C |
| ATOM | 13153 | O   | LEU A 574 | 19.386 | 9.011  | -22.884 | 1.00 | 0.00 | C | O |
| ATOM | 13154 | N   | ARG A 575 | 18.311 | 7.454  | -24.123 | 1.00 | 0.00 | C | N |
| ATOM | 13155 | CA  | ARG A 575 | 17.328 | 8.381  | -24.630 | 1.00 | 0.00 | C | C |
| ATOM | 13156 | CB  | ARG A 575 | 16.715 | 7.838  | -25.924 | 1.00 | 0.00 | C | C |
| ATOM | 13157 | CG  | ARG A 575 | 17.778 | 7.409  | -26.934 | 1.00 | 0.00 | C | C |
| ATOM | 13158 | CD  | ARG A 575 | 18.628 | 8.569  | -27.447 | 1.00 | 0.00 | C | C |
| ATOM | 13159 | NE  | ARG A 575 | 19.591 | 8.008  | -28.438 | 1.00 | 0.00 | C | N |
| ATOM | 13160 | CZ  | ARG A 575 | 19.190 | 7.787  | -29.724 | 1.00 | 0.00 | C | C |
| ATOM | 13161 | NH1 | ARG A 575 | 17.909 | 8.064  | -30.100 | 1.00 | 0.00 | C | N |
| ATOM | 13162 | NH2 | ARG A 575 | 20.070 | 7.283  | -30.641 | 1.00 | 0.00 | C | N |
| ATOM | 13163 | C   | ARG A 575 | 16.162 | 8.756  | -23.749 | 1.00 | 0.00 | C | C |
| ATOM | 13164 | O   | ARG A 575 | 16.068 | 9.877  | -23.250 | 1.00 | 0.00 | C | O |
| ATOM | 13165 | N   | ASP A 576 | 15.268 | 7.771  | -23.492 | 1.00 | 0.00 | C | N |
| ATOM | 13166 | CA  | ASP A 576 | 13.954 | 8.017  | -22.941 | 1.00 | 0.00 | C | C |

|      |       |     |           |        |        |         |      |      |   |   |
|------|-------|-----|-----------|--------|--------|---------|------|------|---|---|
| ATOM | 13167 | CB  | ASP A 576 | 13.072 | 6.754  | -23.007 | 1.00 | 0.00 | C | C |
| ATOM | 13168 | CG  | ASP A 576 | 11.608 | 7.151  | -22.883 | 1.00 | 0.00 | C | C |
| ATOM | 13169 | OD1 | ASP A 576 | 11.310 | 8.128  | -22.148 | 1.00 | 0.00 | C | O |
| ATOM | 13170 | OD2 | ASP A 576 | 10.763 | 6.473  | -23.530 | 1.00 | 0.00 | C | O |
| ATOM | 13171 | C   | ASP A 576 | 13.982 | 8.493  | -21.524 | 1.00 | 0.00 | C | C |
| ATOM | 13172 | O   | ASP A 576 | 13.368 | 9.503  | -21.184 | 1.00 | 0.00 | C | O |
| ATOM | 13173 | N   | LEU A 577 | 14.702 | 7.766  | -20.658 | 1.00 | 0.00 | C | N |
| ATOM | 13174 | CA  | LEU A 577 | 14.775 | 8.109  | -19.272 | 1.00 | 0.00 | C | C |
| ATOM | 13175 | CB  | LEU A 577 | 15.594 | 7.100  | -18.454 | 1.00 | 0.00 | C | C |
| ATOM | 13176 | CG  | LEU A 577 | 15.874 | 7.593  | -17.026 | 1.00 | 0.00 | C | C |
| ATOM | 13177 | CD1 | LEU A 577 | 14.573 | 7.875  | -16.262 | 1.00 | 0.00 | C | C |
| ATOM | 13178 | CD2 | LEU A 577 | 16.814 | 6.637  | -16.281 | 1.00 | 0.00 | C | C |
| ATOM | 13179 | C   | LEU A 577 | 15.468 | 9.417  | -19.146 | 1.00 | 0.00 | C | C |
| ATOM | 13180 | O   | LEU A 577 | 15.038 | 10.292 | -18.398 | 1.00 | 0.00 | C | O |
| ATOM | 13181 | N   | CYS A 578 | 16.559 | 9.583  | -19.908 | 1.00 | 0.00 | C | N |
| ATOM | 13182 | CA  | CYS A 578 | 17.352 | 10.768 | -19.799 | 1.00 | 0.00 | C | C |
| ATOM | 13183 | CB  | CYS A 578 | 18.577 | 10.742 | -20.727 | 1.00 | 0.00 | C | C |
| ATOM | 13184 | SG  | CYS A 578 | 19.592 | 12.243 | -20.595 | 1.00 | 0.00 | C | S |
| ATOM | 13185 | C   | CYS A 578 | 16.520 | 11.947 | -20.179 | 1.00 | 0.00 | C | C |
| ATOM | 13186 | O   | CYS A 578 | 16.543 | 12.972 | -19.501 | 1.00 | 0.00 | C | O |
| ATOM | 13187 | N   | ARG A 579 | 15.758 | 11.836 | -21.279 | 1.00 | 0.00 | C | N |
| ATOM | 13188 | CA  | ARG A 579 | 14.978 | 12.950 | -21.722 | 1.00 | 0.00 | C | C |
| ATOM | 13189 | CB  | ARG A 579 | 14.270 | 12.673 | -23.059 | 1.00 | 0.00 | C | C |
| ATOM | 13190 | CG  | ARG A 579 | 15.223 | 12.603 | -24.254 | 1.00 | 0.00 | C | C |
| ATOM | 13191 | CD  | ARG A 579 | 14.590 | 11.990 | -25.501 | 1.00 | 0.00 | C | C |
| ATOM | 13192 | NE  | ARG A 579 | 15.534 | 12.188 | -26.640 | 1.00 | 0.00 | C | N |
| ATOM | 13193 | CZ  | ARG A 579 | 15.669 | 11.224 | -27.595 | 1.00 | 0.00 | C | C |
| ATOM | 13194 | NH1 | ARG A 579 | 14.986 | 10.049 | -27.477 | 1.00 | 0.00 | C | N |
| ATOM | 13195 | NH2 | ARG A 579 | 16.498 | 11.428 | -28.663 | 1.00 | 0.00 | C | N |
| ATOM | 13196 | C   | ARG A 579 | 13.927 | 13.270 | -20.704 | 1.00 | 0.00 | C | C |
| ATOM | 13197 | O   | ARG A 579 | 13.715 | 14.432 | -20.367 | 1.00 | 0.00 | C | O |
| ATOM | 13198 | N   | PHE A 580 | 13.254 | 12.232 | -20.171 | 1.00 | 0.00 | C | N |
| ATOM | 13199 | CA  | PHE A 580 | 12.159 | 12.401 | -19.256 | 1.00 | 0.00 | C | C |
| ATOM | 13200 | CB  | PHE A 580 | 11.460 | 11.075 | -18.917 | 1.00 | 0.00 | C | C |
| ATOM | 13201 | CG  | PHE A 580 | 10.169 | 11.433 | -18.273 | 1.00 | 0.00 | C | C |
| ATOM | 13202 | CD1 | PHE A 580 | 9.091  | 11.773 | -19.057 | 1.00 | 0.00 | C | C |
| ATOM | 13203 | CE1 | PHE A 580 | 7.889  | 12.108 | -18.483 | 1.00 | 0.00 | C | C |
| ATOM | 13204 | CZ  | PHE A 580 | 7.767  | 12.101 | -17.116 | 1.00 | 0.00 | C | C |



|      |       |               |        |        |         |      |      |   |   |
|------|-------|---------------|--------|--------|---------|------|------|---|---|
| ATOM | 13205 | CD2 PHE A 580 | 10.033 | 11.430 | -16.903 | 1.00 | 0.00 | C | C |
| ATOM | 13206 | CE2 PHE A 580 | 8.834  | 11.763 | -16.324 | 1.00 | 0.00 | C | C |
| ATOM | 13207 | C PHE A 580   | 12.638 | 12.993 | -17.974 | 1.00 | 0.00 | C | C |
| ATOM | 13208 | O PHE A 580   | 11.981 | 13.858 | -17.401 | 1.00 | 0.00 | C | O |
| ATOM | 13209 | N MET A 581   | 13.814 | 12.560 | -17.494 | 1.00 | 0.00 | C | N |
| ATOM | 13210 | CA MET A 581  | 14.265 | 13.025 | -16.220 | 1.00 | 0.00 | C | C |
| ATOM | 13211 | CB MET A 581  | 15.613 | 12.448 | -15.780 | 1.00 | 0.00 | C | C |
| ATOM | 13212 | CG MET A 581  | 16.126 | 13.160 | -14.531 | 1.00 | 0.00 | C | C |
| ATOM | 13213 | SD MET A 581  | 17.349 | 12.242 | -13.569 | 1.00 | 0.00 | C | S |
| ATOM | 13214 | CE MET A 581  | 16.109 | 11.411 | -12.532 | 1.00 | 0.00 | C | C |
| ATOM | 13215 | C MET A 581   | 14.388 | 14.506 | -16.271 | 1.00 | 0.00 | C | C |
| ATOM | 13216 | O MET A 581   | 14.116 | 15.184 | -15.283 | 1.00 | 0.00 | C | O |
| ATOM | 13217 | N PHE A 582   | 14.807 | 15.066 | -17.416 | 1.00 | 0.00 | C | N |
| ATOM | 13218 | CA PHE A 582  | 14.892 | 16.494 | -17.448 | 1.00 | 0.00 | C | C |
| ATOM | 13219 | CB PHE A 582  | 15.372 | 17.059 | -18.798 | 1.00 | 0.00 | C | C |
| ATOM | 13220 | CG PHE A 582  | 16.830 | 16.783 | -18.943 | 1.00 | 0.00 | C | C |
| ATOM | 13221 | CD1 PHE A 582 | 17.737 | 17.456 | -18.157 | 1.00 | 0.00 | C | C |
| ATOM | 13222 | CE1 PHE A 582 | 19.085 | 17.223 | -18.278 | 1.00 | 0.00 | C | C |
| ATOM | 13223 | CZ PHE A 582  | 19.541 | 16.312 | -19.203 | 1.00 | 0.00 | C | C |
| ATOM | 13224 | CD2 PHE A 582 | 17.295 | 15.881 | -19.872 | 1.00 | 0.00 | C | C |
| ATOM | 13225 | CE2 PHE A 582 | 18.644 | 15.644 | -20.000 | 1.00 | 0.00 | C | C |
| ATOM | 13226 | C PHE A 582   | 13.526 | 17.059 | -17.195 | 1.00 | 0.00 | C | C |
| ATOM | 13227 | O PHE A 582   | 13.369 | 17.962 | -16.376 | 1.00 | 0.00 | C | O |
| ATOM | 13228 | N VAL A 583   | 12.500 | 16.534 | -17.894 | 1.00 | 0.00 | C | N |
| ATOM | 13229 | CA VAL A 583  | 11.154 | 17.029 | -17.786 | 1.00 | 0.00 | C | C |
| ATOM | 13230 | CB VAL A 583  | 10.228 | 16.352 | -18.754 | 1.00 | 0.00 | C | C |
| ATOM | 13231 | CG1 VAL A 583 | 8.804  | 16.890 | -18.529 | 1.00 | 0.00 | C | C |
| ATOM | 13232 | CG2 VAL A 583 | 10.765 | 16.555 | -20.180 | 1.00 | 0.00 | C | C |
| ATOM | 13233 | C VAL A 583   | 10.586 | 16.789 | -16.413 | 1.00 | 0.00 | C | C |
| ATOM | 13234 | O VAL A 583   | 10.014 | 17.690 | -15.807 | 1.00 | 0.00 | C | O |
| ATOM | 13235 | N TYR A 584   | 10.725 | 15.562 | -15.881 | 1.00 | 0.00 | C | N |
| ATOM | 13236 | CA TYR A 584  | 10.160 | 15.241 | -14.603 | 1.00 | 0.00 | C | C |
| ATOM | 13237 | CB TYR A 584  | 10.323 | 13.760 | -14.206 | 1.00 | 0.00 | C | C |
| ATOM | 13238 | CG TYR A 584  | 9.901  | 13.618 | -12.782 | 1.00 | 0.00 | C | C |
| ATOM | 13239 | CD1 TYR A 584 | 8.600  | 13.849 | -12.395 | 1.00 | 0.00 | C | C |
| ATOM | 13240 | CE1 TYR A 584 | 8.222  | 13.714 | -11.078 | 1.00 | 0.00 | C | C |
| ATOM | 13241 | CZ TYR A 584  | 9.150  | 13.332 | -10.137 | 1.00 | 0.00 | C | C |
| ATOM | 13242 | OH TYR A 584  | 8.792  | 13.189 | -8.781  | 1.00 | 0.00 | C | O |

|      |       |               |        |        |         |      |      |   |   |
|------|-------|---------------|--------|--------|---------|------|------|---|---|
| ATOM | 13243 | CD2 TYR A 584 | 10.813 | 13.218 | -11.831 | 1.00 | 0.00 | C | C |
| ATOM | 13244 | CE2 TYR A 584 | 10.443 | 13.081 | -10.515 | 1.00 | 0.00 | C | C |
| ATOM | 13245 | C TYR A 584   | 10.820 | 16.086 | -13.574 | 1.00 | 0.00 | C | C |
| ATOM | 13246 | O TYR A 584   | 10.169 | 16.603 | -12.668 | 1.00 | 0.00 | C | O |
| ATOM | 13247 | N ILE A 585   | 12.147 | 16.254 | -13.691 | 1.00 | 0.00 | C | N |
| ATOM | 13248 | CA ILE A 585  | 12.841 | 17.062 | -12.741 | 1.00 | 0.00 | C | C |
| ATOM | 13249 | CB ILE A 585  | 14.331 | 17.033 | -12.895 | 1.00 | 0.00 | C | C |
| ATOM | 13250 | CG2 ILE A 585 | 14.903 | 18.363 | -12.381 | 1.00 | 0.00 | C | C |
| ATOM | 13251 | CG1 ILE A 585 | 14.887 | 15.792 | -12.171 | 1.00 | 0.00 | C | C |
| ATOM | 13252 | CD ILE A 585  | 14.288 | 14.473 | -12.643 | 1.00 | 0.00 | C | C |
| ATOM | 13253 | C ILE A 585   | 12.350 | 18.471 | -12.793 | 1.00 | 0.00 | C | C |
| ATOM | 13254 | O ILE A 585   | 12.160 | 19.084 | -11.744 | 1.00 | 0.00 | C | O |
| ATOM | 13255 | N VAL A 586   | 12.129 | 19.038 | -13.994 | 1.00 | 0.00 | C | N |
| ATOM | 13256 | CA VAL A 586  | 11.692 | 20.403 | -14.019 | 1.00 | 0.00 | C | C |
| ATOM | 13257 | CB VAL A 586  | 11.631 | 21.007 | -15.397 | 1.00 | 0.00 | C | C |
| ATOM | 13258 | CG1 VAL A 586 | 10.508 | 20.350 | -16.215 | 1.00 | 0.00 | C | C |
| ATOM | 13259 | CG2 VAL A 586 | 11.464 | 22.526 | -15.243 | 1.00 | 0.00 | C | C |
| ATOM | 13260 | C VAL A 586   | 10.344 | 20.518 | -13.374 | 1.00 | 0.00 | C | C |
| ATOM | 13261 | O VAL A 586   | 10.129 | 21.400 | -12.545 | 1.00 | 0.00 | C | O |
| ATOM | 13262 | N PHE A 587   | 9.394  | 19.624 | -13.720 | 1.00 | 0.00 | C | N |
| ATOM | 13263 | CA PHE A 587  | 8.083  | 19.713 | -13.141 | 1.00 | 0.00 | C | C |
| ATOM | 13264 | CB PHE A 587  | 7.049  | 18.754 | -13.762 | 1.00 | 0.00 | C | C |
| ATOM | 13265 | CG PHE A 587  | 6.523  | 19.393 | -15.006 | 1.00 | 0.00 | C | C |
| ATOM | 13266 | CD1 PHE A 587 | 5.450  | 20.254 | -14.935 | 1.00 | 0.00 | C | C |
| ATOM | 13267 | CE1 PHE A 587 | 4.947  | 20.856 | -16.066 | 1.00 | 0.00 | C | C |
| ATOM | 13268 | CZ PHE A 587  | 5.516  | 20.598 | -17.289 | 1.00 | 0.00 | C | C |
| ATOM | 13269 | CD2 PHE A 587 | 7.086  | 19.140 | -16.235 | 1.00 | 0.00 | C | C |
| ATOM | 13270 | CE2 PHE A 587 | 6.584  | 19.739 | -17.370 | 1.00 | 0.00 | C | C |
| ATOM | 13271 | C PHE A 587   | 8.149  | 19.459 | -11.668 | 1.00 | 0.00 | C | C |
| ATOM | 13272 | O PHE A 587   | 7.544  | 20.186 | -10.882 | 1.00 | 0.00 | C | O |
| ATOM | 13273 | N LEU A 588   | 8.899  | 18.423 | -11.251 | 1.00 | 0.00 | C | N |
| ATOM | 13274 | CA LEU A 588  | 8.952  | 18.094 | -9.856  | 1.00 | 0.00 | C | C |
| ATOM | 13275 | CB LEU A 588  | 9.786  | 16.824 | -9.574  | 1.00 | 0.00 | C | C |
| ATOM | 13276 | CG LEU A 588  | 11.327 | 16.985 | -9.603  | 1.00 | 0.00 | C | C |
| ATOM | 13277 | CD1 LEU A 588 | 11.879 | 17.609 | -8.307  | 1.00 | 0.00 | C | C |
| ATOM | 13278 | CD2 LEU A 588 | 12.031 | 15.665 | -9.945  | 1.00 | 0.00 | C | C |
| ATOM | 13279 | C LEU A 588   | 9.571  | 19.233 | -9.111  | 1.00 | 0.00 | C | C |
| ATOM | 13280 | O LEU A 588   | 9.073  | 19.654 | -8.069  | 1.00 | 0.00 | C | O |

|      |       |     |           |        |        |         |      |      |   |   |
|------|-------|-----|-----------|--------|--------|---------|------|------|---|---|
| ATOM | 13281 | N   | PHE A 589 | 10.672 | 19.780 | -9.651  | 1.00 | 0.00 | C | N |
| ATOM | 13282 | CA  | PHE A 589 | 11.395 | 20.785 | -8.937  | 1.00 | 0.00 | C | C |
| ATOM | 13283 | CB  | PHE A 589 | 12.702 | 21.195 | -9.632  | 1.00 | 0.00 | C | C |
| ATOM | 13284 | CG  | PHE A 589 | 13.442 | 22.073 | -8.684  | 1.00 | 0.00 | C | C |
| ATOM | 13285 | CD1 | PHE A 589 | 14.316 | 21.526 | -7.773  | 1.00 | 0.00 | C | C |
| ATOM | 13286 | CE1 | PHE A 589 | 15.002 | 22.324 | -6.890  | 1.00 | 0.00 | C | C |
| ATOM | 13287 | CZ  | PHE A 589 | 14.815 | 23.686 | -6.914  | 1.00 | 0.00 | C | C |
| ATOM | 13288 | CD2 | PHE A 589 | 13.255 | 23.434 | -8.700  | 1.00 | 0.00 | C | C |
| ATOM | 13289 | CE2 | PHE A 589 | 13.941 | 24.239 | -7.820  | 1.00 | 0.00 | C | C |
| ATOM | 13290 | C   | PHE A 589 | 10.542 | 22.002 | -8.764  | 1.00 | 0.00 | C | C |
| ATOM | 13291 | O   | PHE A 589 | 10.480 | 22.569 | -7.674  | 1.00 | 0.00 | C | O |
| ATOM | 13292 | N   | GLY A 590 | 9.847  | 22.432 | -9.832  | 1.00 | 0.00 | C | N |
| ATOM | 13293 | CA  | GLY A 590 | 9.060  | 23.626 | -9.741  | 1.00 | 0.00 | C | C |
| ATOM | 13294 | C   | GLY A 590 | 7.973  | 23.430 | -8.731  | 1.00 | 0.00 | C | C |
| ATOM | 13295 | O   | GLY A 590 | 7.709  | 24.308 | -7.912  | 1.00 | 0.00 | C | O |
| ATOM | 13296 | N   | PHE A 591 | 7.308  | 22.261 | -8.755  | 1.00 | 0.00 | C | N |
| ATOM | 13297 | CA  | PHE A 591 | 6.231  | 22.036 | -7.839  | 1.00 | 0.00 | C | C |
| ATOM | 13298 | CB  | PHE A 591 | 5.456  | 20.734 | -8.090  | 1.00 | 0.00 | C | C |
| ATOM | 13299 | CG  | PHE A 591 | 4.463  | 21.027 | -9.161  | 1.00 | 0.00 | C | C |
| ATOM | 13300 | CD1 | PHE A 591 | 4.830  | 21.116 | -10.484 | 1.00 | 0.00 | C | C |
| ATOM | 13301 | CE1 | PHE A 591 | 3.892  | 21.381 | -11.455 | 1.00 | 0.00 | C | C |
| ATOM | 13302 | CZ  | PHE A 591 | 2.572  | 21.554 | -11.111 | 1.00 | 0.00 | C | C |
| ATOM | 13303 | CD2 | PHE A 591 | 3.138  | 21.196 | -8.828  | 1.00 | 0.00 | C | C |
| ATOM | 13304 | CE2 | PHE A 591 | 2.195  | 21.459 | -9.793  | 1.00 | 0.00 | C | C |
| ATOM | 13305 | C   | PHE A 591 | 6.751  | 22.033 | -6.440  | 1.00 | 0.00 | C | C |
| ATOM | 13306 | O   | PHE A 591 | 6.104  | 22.548 | -5.529  | 1.00 | 0.00 | C | O |
| ATOM | 13307 | N   | SER A 592 | 7.936  | 21.443 | -6.237  | 1.00 | 0.00 | C | N |
| ATOM | 13308 | CA  | SER A 592 | 8.538  | 21.368 | -4.942  | 1.00 | 0.00 | C | C |
| ATOM | 13309 | CB  | SER A 592 | 9.889  | 20.652 | -5.002  | 1.00 | 0.00 | C | C |
| ATOM | 13310 | OG  | SER A 592 | 10.486 | 20.666 | -3.721  | 1.00 | 0.00 | C | O |
| ATOM | 13311 | C   | SER A 592 | 8.789  | 22.756 | -4.433  | 1.00 | 0.00 | C | C |
| ATOM | 13312 | O   | SER A 592 | 8.521  | 23.055 | -3.270  | 1.00 | 0.00 | C | O |
| ATOM | 13313 | N   | THR A 593 | 9.305  | 23.647 | -5.297  | 1.00 | 0.00 | C | N |
| ATOM | 13314 | CA  | THR A 593 | 9.607  | 24.978 | -4.858  | 1.00 | 0.00 | C | C |
| ATOM | 13315 | CB  | THR A 593 | 10.256 | 25.829 | -5.909  | 1.00 | 0.00 | C | C |
| ATOM | 13316 | OG1 | THR A 593 | 9.375  | 26.049 | -6.999  | 1.00 | 0.00 | C | O |
| ATOM | 13317 | CG2 | THR A 593 | 11.519 | 25.101 | -6.383  | 1.00 | 0.00 | C | C |
| ATOM | 13318 | C   | THR A 593 | 8.332  | 25.646 | -4.469  | 1.00 | 0.00 | C | C |

|      |       |     |           |        |        |        |      |      |   |   |
|------|-------|-----|-----------|--------|--------|--------|------|------|---|---|
| ATOM | 13319 | O   | THR A 593 | 8.281  | 26.365 | -3.475 | 1.00 | 0.00 | C | O |
| ATOM | 13320 | N   | ALA A 594 | 7.260  | 25.419 | -5.250 | 1.00 | 0.00 | C | N |
| ATOM | 13321 | CA  | ALA A 594 | 6.010  | 26.061 | -4.975 | 1.00 | 0.00 | C | C |
| ATOM | 13322 | CB  | ALA A 594 | 4.921  | 25.706 | -6.004 | 1.00 | 0.00 | C | C |
| ATOM | 13323 | C   | ALA A 594 | 5.518  | 25.626 | -3.628 | 1.00 | 0.00 | C | C |
| ATOM | 13324 | O   | ALA A 594 | 5.018  | 26.437 | -2.853 | 1.00 | 0.00 | C | O |
| ATOM | 13325 | N   | VAL A 595 | 5.644  | 24.323 | -3.313 | 1.00 | 0.00 | C | N |
| ATOM | 13326 | CA  | VAL A 595 | 5.161  | 23.813 | -2.060 | 1.00 | 0.00 | C | C |
| ATOM | 13327 | CB  | VAL A 595 | 5.262  | 22.317 | -1.938 | 1.00 | 0.00 | C | C |
| ATOM | 13328 | CG1 | VAL A 595 | 4.779  | 21.913 | -0.534 | 1.00 | 0.00 | C | C |
| ATOM | 13329 | CG2 | VAL A 595 | 4.465  | 21.666 | -3.082 | 1.00 | 0.00 | C | C |
| ATOM | 13330 | C   | VAL A 595 | 5.948  | 24.387 | -0.922 | 1.00 | 0.00 | C | C |
| ATOM | 13331 | O   | VAL A 595 | 5.386  | 24.730 | 0.116  | 1.00 | 0.00 | C | O |
| ATOM | 13332 | N   | VAL A 596 | 7.276  | 24.519 | -1.092 | 1.00 | 0.00 | C | N |
| ATOM | 13333 | CA  | VAL A 596 | 8.126  | 24.919 | -0.005 | 1.00 | 0.00 | C | C |
| ATOM | 13334 | CB  | VAL A 596 | 9.581  | 24.924 | -0.398 | 1.00 | 0.00 | C | C |
| ATOM | 13335 | CG1 | VAL A 596 | 9.891  | 26.155 | -1.266 | 1.00 | 0.00 | C | C |
| ATOM | 13336 | CG2 | VAL A 596 | 10.444 | 24.802 | 0.864  | 1.00 | 0.00 | C | C |
| ATOM | 13337 | C   | VAL A 596 | 7.711  | 26.273 | 0.492  | 1.00 | 0.00 | C | C |
| ATOM | 13338 | O   | VAL A 596 | 7.672  | 26.515 | 1.697  | 1.00 | 0.00 | C | O |
| ATOM | 13339 | N   | THR A 597 | 7.405  | 27.203 | -0.427 | 1.00 | 0.00 | C | N |
| ATOM | 13340 | CA  | THR A 597 | 6.998  | 28.528 | -0.053 | 1.00 | 0.00 | C | C |
| ATOM | 13341 | CB  | THR A 597 | 6.965  | 29.465 | -1.221 | 1.00 | 0.00 | C | C |
| ATOM | 13342 | OG1 | THR A 597 | 6.585  | 30.757 | -0.786 | 1.00 | 0.00 | C | O |
| ATOM | 13343 | CG2 | THR A 597 | 5.962  | 28.943 | -2.261 | 1.00 | 0.00 | C | C |
| ATOM | 13344 | C   | THR A 597 | 5.625  | 28.544 | 0.566  | 1.00 | 0.00 | C | C |
| ATOM | 13345 | O   | THR A 597 | 5.376  | 29.285 | 1.517  | 1.00 | 0.00 | C | O |
| ATOM | 13346 | N   | LEU A 598 | 4.697  | 27.714 | 0.053  | 1.00 | 0.00 | C | N |
| ATOM | 13347 | CA  | LEU A 598 | 3.306  | 27.792 | 0.420  | 1.00 | 0.00 | C | C |
| ATOM | 13348 | CB  | LEU A 598 | 2.465  | 26.723 | -0.301 | 1.00 | 0.00 | C | C |
| ATOM | 13349 | CG  | LEU A 598 | 0.944  | 26.877 | -0.114 | 1.00 | 0.00 | C | C |
| ATOM | 13350 | CD1 | LEU A 598 | 0.392  | 28.032 | -0.962 | 1.00 | 0.00 | C | C |
| ATOM | 13351 | CD2 | LEU A 598 | 0.205  | 25.557 | -0.357 | 1.00 | 0.00 | C | C |
| ATOM | 13352 | C   | LEU A 598 | 3.117  | 27.564 | 1.883  | 1.00 | 0.00 | C | C |
| ATOM | 13353 | O   | LEU A 598 | 2.411  | 28.322 | 2.550  | 1.00 | 0.00 | C | O |
| ATOM | 13354 | N   | ILE A 599 | 3.714  | 26.488 | 2.422  | 1.00 | 0.00 | C | N |
| ATOM | 13355 | CA  | ILE A 599 | 3.570  | 26.254 | 3.820  | 1.00 | 0.00 | C | C |
| ATOM | 13356 | CB  | ILE A 599 | 2.189  | 25.820 | 4.151  | 1.00 | 0.00 | C | C |

|      |       |     |           |       |        |       |      |      |   |   |
|------|-------|-----|-----------|-------|--------|-------|------|------|---|---|
| ATOM | 13357 | CG2 | ILE A 599 | 1.751 | 24.702 | 3.195 | 1.00 | 0.00 | C | C |
| ATOM | 13358 | CG1 | ILE A 599 | 2.094 | 25.536 | 5.638 | 1.00 | 0.00 | C | C |
| ATOM | 13359 | CD  | ILE A 599 | 0.653 | 25.432 | 6.065 | 1.00 | 0.00 | C | C |
| ATOM | 13360 | C   | ILE A 599 | 4.586 | 25.244 | 4.259 | 1.00 | 0.00 | C | C |
| ATOM | 13361 | O   | ILE A 599 | 4.669 | 24.151 | 3.704 | 1.00 | 0.00 | C | O |
| ATOM | 13362 | N   | GLU A 600 | 5.386 | 25.589 | 5.288 | 1.00 | 0.00 | C | N |
| ATOM | 13363 | CA  | GLU A 600 | 6.432 | 24.715 | 5.738 | 1.00 | 0.00 | C | C |
| ATOM | 13364 | CB  | GLU A 600 | 7.332 | 25.363 | 6.810 | 1.00 | 0.00 | C | C |
| ATOM | 13365 | CG  | GLU A 600 | 6.598 | 25.880 | 8.049 | 1.00 | 0.00 | C | C |
| ATOM | 13366 | CD  | GLU A 600 | 6.494 | 24.771 | 9.083 | 1.00 | 0.00 | C | C |
| ATOM | 13367 | OE1 | GLU A 600 | 7.560 | 24.244 | 9.504 | 1.00 | 0.00 | C | O |
| ATOM | 13368 | OE2 | GLU A 600 | 5.344 | 24.447 | 9.475 | 1.00 | 0.00 | C | O |
| ATOM | 13369 | C   | GLU A 600 | 5.831 | 23.455 | 6.273 | 1.00 | 0.00 | C | C |
| ATOM | 13370 | O   | GLU A 600 | 6.296 | 22.364 | 5.945 | 1.00 | 0.00 | C | O |
| ATOM | 13371 | N   | ASP A 601 | 4.755 | 23.574 | 7.074 | 1.00 | 0.00 | C | N |
| ATOM | 13372 | CA  | ASP A 601 | 4.102 | 22.414 | 7.611 | 1.00 | 0.00 | C | C |
| ATOM | 13373 | CB  | ASP A 601 | 3.475 | 21.529 | 6.529 | 1.00 | 0.00 | C | C |
| ATOM | 13374 | CG  | ASP A 601 | 2.407 | 22.342 | 5.839 | 1.00 | 0.00 | C | C |
| ATOM | 13375 | OD1 | ASP A 601 | 1.507 | 22.869 | 6.547 | 1.00 | 0.00 | C | O |
| ATOM | 13376 | OD2 | ASP A 601 | 2.488 | 22.466 | 4.587 | 1.00 | 0.00 | C | O |
| ATOM | 13377 | C   | ASP A 601 | 5.116 | 21.561 | 8.278 | 1.00 | 0.00 | C | C |
| ATOM | 13378 | O   | ASP A 601 | 5.992 | 22.040 | 9.000 | 1.00 | 0.00 | C | O |
| ATOM | 13379 | N   | GLY A 602 | 4.991 | 20.235 | 8.074 | 1.00 | 0.00 | C | N |
| ATOM | 13380 | CA  | GLY A 602 | 5.975 | 19.368 | 8.633 | 1.00 | 0.00 | C | C |
| ATOM | 13381 | C   | GLY A 602 | 6.355 | 18.377 | 7.580 | 1.00 | 0.00 | C | C |
| ATOM | 13382 | O   | GLY A 602 | 5.476 | 17.817 | 6.929 | 1.00 | 0.00 | C | O |
| ATOM | 13383 | N   | LYS A 603 | 7.686 | 18.171 | 7.405 | 1.00 | 0.00 | C | N |
| ATOM | 13384 | CA  | LYS A 603 | 8.297 | 17.186 | 6.538 | 1.00 | 0.00 | C | C |
| ATOM | 13385 | CB  | LYS A 603 | 7.374 | 16.528 | 5.505 | 1.00 | 0.00 | C | C |
| ATOM | 13386 | CG  | LYS A 603 | 7.953 | 15.293 | 4.830 | 1.00 | 0.00 | C | C |
| ATOM | 13387 | CD  | LYS A 603 | 6.824 | 14.483 | 4.217 | 1.00 | 0.00 | C | C |
| ATOM | 13388 | CE  | LYS A 603 | 5.624 | 14.424 | 5.167 | 1.00 | 0.00 | C | C |
| ATOM | 13389 | NZ  | LYS A 603 | 4.481 | 13.755 | 4.517 | 1.00 | 0.00 | C | N |
| ATOM | 13390 | C   | LYS A 603 | 9.453 | 17.743 | 5.726 | 1.00 | 0.00 | C | C |
| ATOM | 13391 | O   | LYS A 603 | 9.327 | 17.666 | 4.470 | 1.00 | 0.00 | C | O |
| ATOM | 13392 | N   | TYR B 628 | 7.232 | 19.368 | 4.903 | 1.00 | 0.00 | C | N |
| ATOM | 13393 | CA  | TYR B 628 | 7.734 | 19.995 | 3.666 | 1.00 | 0.00 | C | C |
| ATOM | 13394 | CB  | TYR B 628 | 6.554 | 20.545 | 2.863 | 1.00 | 0.00 | C | C |

|      |       |     |           |        |        |        |      |      |   |   |
|------|-------|-----|-----------|--------|--------|--------|------|------|---|---|
| ATOM | 13395 | CG  | TYR B 628 | 5.760  | 19.395 | 2.361  | 1.00 | 0.00 | C | C |
| ATOM | 13396 | CD1 | TYR B 628 | 4.884  | 18.726 | 3.185  | 1.00 | 0.00 | C | C |
| ATOM | 13397 | CE1 | TYR B 628 | 4.148  | 17.668 | 2.707  | 1.00 | 0.00 | C | C |
| ATOM | 13398 | CZ  | TYR B 628 | 4.284  | 17.275 | 1.397  | 1.00 | 0.00 | C | C |
| ATOM | 13399 | OH  | TYR B 628 | 3.527  | 16.189 | 0.905  | 1.00 | 0.00 | C | O |
| ATOM | 13400 | CD2 | TYR B 628 | 5.889  | 18.995 | 1.053  | 1.00 | 0.00 | C | C |
| ATOM | 13401 | CE2 | TYR B 628 | 5.156  | 17.939 | 0.570  | 1.00 | 0.00 | C | C |
| ATOM | 13402 | C   | TYR B 628 | 8.685  | 21.130 | 3.883  | 1.00 | 0.00 | C | C |
| ATOM | 13403 | O   | TYR B 628 | 8.927  | 21.925 | 2.977  | 1.00 | 0.00 | C | O |
| ATOM | 13404 | N   | ASN B 629 | 9.264  | 21.228 | 5.091  | 1.00 | 0.00 | C | N |
| ATOM | 13405 | CA  | ASN B 629 | 10.153 | 22.309 | 5.392  | 1.00 | 0.00 | C | C |
| ATOM | 13406 | CB  | ASN B 629 | 10.668 | 22.260 | 6.839  | 1.00 | 0.00 | C | C |
| ATOM | 13407 | CG  | ASN B 629 | 9.477  | 22.420 | 7.765  | 1.00 | 0.00 | C | C |
| ATOM | 13408 | OD1 | ASN B 629 | 8.379  | 22.771 | 7.336  | 1.00 | 0.00 | C | O |
| ATOM | 13409 | ND2 | ASN B 629 | 9.701  | 22.157 | 9.080  | 1.00 | 0.00 | C | N |
| ATOM | 13410 | C   | ASN B 629 | 11.355 | 22.227 | 4.499  | 1.00 | 0.00 | C | C |
| ATOM | 13411 | O   | ASN B 629 | 11.819 | 23.242 | 3.983  | 1.00 | 0.00 | C | O |
| ATOM | 13412 | N   | SER B 630 | 11.884 | 21.006 | 4.282  | 1.00 | 0.00 | C | N |
| ATOM | 13413 | CA  | SER B 630 | 13.088 | 20.863 | 3.508  | 1.00 | 0.00 | C | C |
| ATOM | 13414 | CB  | SER B 630 | 14.036 | 19.769 | 4.034  | 1.00 | 0.00 | C | C |
| ATOM | 13415 | OG  | SER B 630 | 15.191 | 19.681 | 3.211  | 1.00 | 0.00 | C | O |
| ATOM | 13416 | C   | SER B 630 | 12.752 | 20.500 | 2.099  | 1.00 | 0.00 | C | C |
| ATOM | 13417 | O   | SER B 630 | 11.758 | 19.835 | 1.827  | 1.00 | 0.00 | C | O |
| ATOM | 13418 | N   | LEU B 631 | 13.585 | 20.998 | 1.161  | 1.00 | 0.00 | C | N |
| ATOM | 13419 | CA  | LEU B 631 | 13.462 | 20.734 | -0.244 | 1.00 | 0.00 | C | C |
| ATOM | 13420 | CB  | LEU B 631 | 14.433 | 21.586 | -1.077 | 1.00 | 0.00 | C | C |
| ATOM | 13421 | CG  | LEU B 631 | 14.323 | 21.348 | -2.592 | 1.00 | 0.00 | C | C |
| ATOM | 13422 | CD1 | LEU B 631 | 12.955 | 21.800 | -3.123 | 1.00 | 0.00 | C | C |
| ATOM | 13423 | CD2 | LEU B 631 | 15.490 | 22.001 | -3.351 | 1.00 | 0.00 | C | C |
| ATOM | 13424 | C   | LEU B 631 | 13.785 | 19.291 | -0.505 | 1.00 | 0.00 | C | C |
| ATOM | 13425 | O   | LEU B 631 | 13.097 | 18.618 | -1.272 | 1.00 | 0.00 | C | O |
| ATOM | 13426 | N   | TYR B 632 | 14.846 | 18.769 | 0.144  | 1.00 | 0.00 | C | N |
| ATOM | 13427 | CA  | TYR B 632 | 15.256 | 17.414 | -0.087 | 1.00 | 0.00 | C | C |
| ATOM | 13428 | CB  | TYR B 632 | 16.513 | 17.026 | 0.714  | 1.00 | 0.00 | C | C |
| ATOM | 13429 | CG  | TYR B 632 | 16.708 | 15.552 | 0.583  | 1.00 | 0.00 | C | C |
| ATOM | 13430 | CD1 | TYR B 632 | 17.210 | 15.005 | -0.574 | 1.00 | 0.00 | C | C |
| ATOM | 13431 | CE1 | TYR B 632 | 17.392 | 13.646 | -0.686 | 1.00 | 0.00 | C | C |
| ATOM | 13432 | CZ  | TYR B 632 | 17.072 | 12.819 | 0.365  | 1.00 | 0.00 | C | C |

|      |       |     |     |   |     |        |        |        |      |      |   |   |
|------|-------|-----|-----|---|-----|--------|--------|--------|------|------|---|---|
| ATOM | 13433 | OH  | TYR | B | 632 | 17.257 | 11.425 | 0.255  | 1.00 | 0.00 | C | O |
| ATOM | 13434 | CD2 | TYR | B | 632 | 16.394 | 14.717 | 1.631  | 1.00 | 0.00 | C | C |
| ATOM | 13435 | CE2 | TYR | B | 632 | 16.573 | 13.357 | 1.525  | 1.00 | 0.00 | C | C |
| ATOM | 13436 | C   | TYR | B | 632 | 14.153 | 16.496 | 0.323  | 1.00 | 0.00 | C | C |
| ATOM | 13437 | O   | TYR | B | 632 | 13.830 | 15.548 | -0.392 | 1.00 | 0.00 | C | O |
| ATOM | 13438 | N   | SER | B | 633 | 13.554 | 16.742 | 1.500  | 1.00 | 0.00 | C | N |
| ATOM | 13439 | CA  | SER | B | 633 | 12.488 | 15.914 | 1.987  | 1.00 | 0.00 | C | C |
| ATOM | 13440 | CB  | SER | B | 633 | 12.121 | 16.238 | 3.444  | 1.00 | 0.00 | C | C |
| ATOM | 13441 | OG  | SER | B | 633 | 11.730 | 17.597 | 3.549  | 1.00 | 0.00 | C | O |
| ATOM | 13442 | C   | SER | B | 633 | 11.255 | 16.092 | 1.147  | 1.00 | 0.00 | C | C |
| ATOM | 13443 | O   | SER | B | 633 | 10.603 | 15.115 | 0.780  | 1.00 | 0.00 | C | O |
| ATOM | 13444 | N   | THR | B | 634 | 10.909 | 17.348 | 0.802  | 1.00 | 0.00 | C | N |
| ATOM | 13445 | CA  | THR | B | 634 | 9.712  | 17.606 | 0.048  | 1.00 | 0.00 | C | C |
| ATOM | 13446 | CB  | THR | B | 634 | 9.448  | 19.062 | -0.223 | 1.00 | 0.00 | C | C |
| ATOM | 13447 | OG1 | THR | B | 634 | 10.563 | 19.657 | -0.870 | 1.00 | 0.00 | C | O |
| ATOM | 13448 | CG2 | THR | B | 634 | 9.122  | 19.787 | 1.085  | 1.00 | 0.00 | C | C |
| ATOM | 13449 | C   | THR | B | 634 | 9.810  | 16.948 | -1.287 | 1.00 | 0.00 | C | C |
| ATOM | 13450 | O   | THR | B | 634 | 8.831  | 16.399 | -1.787 | 1.00 | 0.00 | C | O |
| ATOM | 13451 | N   | CYS | B | 635 | 11.001 | 16.996 | -1.912 | 1.00 | 0.00 | C | N |
| ATOM | 13452 | CA  | CYS | B | 635 | 11.157 | 16.409 | -3.209 | 1.00 | 0.00 | C | C |
| ATOM | 13453 | CB  | CYS | B | 635 | 12.580 | 16.574 | -3.775 | 1.00 | 0.00 | C | C |
| ATOM | 13454 | SG  | CYS | B | 635 | 12.772 | 15.825 | -5.421 | 1.00 | 0.00 | C | S |
| ATOM | 13455 | C   | CYS | B | 635 | 10.884 | 14.947 | -3.085 | 1.00 | 0.00 | C | C |
| ATOM | 13456 | O   | CYS | B | 635 | 10.199 | 14.360 | -3.921 | 1.00 | 0.00 | C | O |
| ATOM | 13457 | N   | LEU | B | 636 | 11.406 | 14.320 | -2.013 | 1.00 | 0.00 | C | N |
| ATOM | 13458 | CA  | LEU | B | 636 | 11.203 | 12.913 | -1.830 | 1.00 | 0.00 | C | C |
| ATOM | 13459 | CB  | LEU | B | 636 | 11.933 | 12.337 | -0.606 | 1.00 | 0.00 | C | C |
| ATOM | 13460 | CG  | LEU | B | 636 | 13.461 | 12.325 | -0.763 | 1.00 | 0.00 | C | C |
| ATOM | 13461 | CD1 | LEU | B | 636 | 14.142 | 11.687 | 0.458  | 1.00 | 0.00 | C | C |
| ATOM | 13462 | CD2 | LEU | B | 636 | 13.879 | 11.674 | -2.094 | 1.00 | 0.00 | C | C |
| ATOM | 13463 | C   | LEU | B | 636 | 9.743  | 12.674 | -1.646 | 1.00 | 0.00 | C | C |
| ATOM | 13464 | O   | LEU | B | 636 | 9.199  | 11.688 | -2.143 | 1.00 | 0.00 | C | O |
| ATOM | 13465 | N   | GLU | B | 637 | 9.064  | 13.577 | -0.919 | 1.00 | 0.00 | C | N |
| ATOM | 13466 | CA  | GLU | B | 637 | 7.668  | 13.402 | -0.671 | 1.00 | 0.00 | C | C |
| ATOM | 13467 | CB  | GLU | B | 637 | 7.105  | 14.501 | 0.246  | 1.00 | 0.00 | C | C |
| ATOM | 13468 | CG  | GLU | B | 637 | 5.972  | 14.029 | 1.161  | 1.00 | 0.00 | C | C |
| ATOM | 13469 | CD  | GLU | B | 637 | 4.919  | 13.316 | 0.333  | 1.00 | 0.00 | C | C |
| ATOM | 13470 | OE1 | GLU | B | 637 | 4.360  | 13.958 | -0.596 | 1.00 | 0.00 | C | O |

|      |       |     |     |   |     |        |        |        |      |      |   |   |
|------|-------|-----|-----|---|-----|--------|--------|--------|------|------|---|---|
| ATOM | 13471 | OE2 | GLU | B | 637 | 4.664  | 12.117 | 0.619  | 1.00 | 0.00 | C | O |
| ATOM | 13472 | C   | GLU | B | 637 | 6.956  | 13.473 | -1.994 | 1.00 | 0.00 | C | C |
| ATOM | 13473 | O   | GLU | B | 637 | 6.038  | 12.698 | -2.253 | 1.00 | 0.00 | C | O |
| ATOM | 13474 | N   | LEU | B | 638 | 7.368  | 14.419 | -2.864 | 1.00 | 0.00 | C | N |
| ATOM | 13475 | CA  | LEU | B | 638 | 6.763  | 14.622 | -4.157 | 1.00 | 0.00 | C | C |
| ATOM | 13476 | CB  | LEU | B | 638 | 7.305  | 15.853 | -4.904 | 1.00 | 0.00 | C | C |
| ATOM | 13477 | CG  | LEU | B | 638 | 6.951  | 17.200 | -4.252 | 1.00 | 0.00 | C | C |
| ATOM | 13478 | CD1 | LEU | B | 638 | 7.438  | 18.372 | -5.119 | 1.00 | 0.00 | C | C |
| ATOM | 13479 | CD2 | LEU | B | 638 | 5.452  | 17.282 | -3.920 | 1.00 | 0.00 | C | C |
| ATOM | 13480 | C   | LEU | B | 638 | 7.010  | 13.450 | -5.056 | 1.00 | 0.00 | C | C |
| ATOM | 13481 | O   | LEU | B | 638 | 6.119  | 13.023 | -5.787 | 1.00 | 0.00 | C | O |
| ATOM | 13482 | N   | PHE | B | 639 | 8.237  | 12.902 | -5.021 | 1.00 | 0.00 | C | N |
| ATOM | 13483 | CA  | PHE | B | 639 | 8.624  | 11.816 | -5.877 | 1.00 | 0.00 | C | C |
| ATOM | 13484 | CB  | PHE | B | 639 | 10.093 | 11.405 | -5.677 | 1.00 | 0.00 | C | C |
| ATOM | 13485 | CG  | PHE | B | 639 | 10.394 | 10.284 | -6.611 | 1.00 | 0.00 | C | C |
| ATOM | 13486 | CD1 | PHE | B | 639 | 10.750 | 10.547 | -7.913 | 1.00 | 0.00 | C | C |
| ATOM | 13487 | CE1 | PHE | B | 639 | 11.028 | 9.524  | -8.789 | 1.00 | 0.00 | C | C |
| ATOM | 13488 | CZ  | PHE | B | 639 | 10.952 | 8.219  | -8.371 | 1.00 | 0.00 | C | C |
| ATOM | 13489 | CD2 | PHE | B | 639 | 10.312 | 8.974  | -6.200 | 1.00 | 0.00 | C | C |
| ATOM | 13490 | CE2 | PHE | B | 639 | 10.591 | 7.949  | -7.074 | 1.00 | 0.00 | C | C |
| ATOM | 13491 | C   | PHE | B | 639 | 7.757  | 10.646 | -5.549 | 1.00 | 0.00 | C | C |
| ATOM | 13492 | O   | PHE | B | 639 | 7.358  | 9.887  | -6.433 | 1.00 | 0.00 | C | O |
| ATOM | 13493 | N   | LYS | B | 640 | 7.433  | 10.477 | -4.254 | 1.00 | 0.00 | C | N |
| ATOM | 13494 | CA  | LYS | B | 640 | 6.627  | 9.375  | -3.815 | 1.00 | 0.00 | C | C |
| ATOM | 13495 | CB  | LYS | B | 640 | 6.239  | 9.481  | -2.329 | 1.00 | 0.00 | C | C |
| ATOM | 13496 | CG  | LYS | B | 640 | 7.412  | 9.491  | -1.350 | 1.00 | 0.00 | C | C |
| ATOM | 13497 | CD  | LYS | B | 640 | 7.003  | 9.971  | 0.044  | 1.00 | 0.00 | C | C |
| ATOM | 13498 | CE  | LYS | B | 640 | 8.143  | 10.000 | 1.063  | 1.00 | 0.00 | C | C |
| ATOM | 13499 | NZ  | LYS | B | 640 | 7.665  | 10.608 | 2.325  | 1.00 | 0.00 | C | N |
| ATOM | 13500 | C   | LYS | B | 640 | 5.335  | 9.456  | -4.556 | 1.00 | 0.00 | C | C |
| ATOM | 13501 | O   | LYS | B | 640 | 4.809  | 8.448  | -5.024 | 1.00 | 0.00 | C | O |
| ATOM | 13502 | N   | PHE | B | 641 | 4.790  | 10.679 | -4.677 | 1.00 | 0.00 | C | N |
| ATOM | 13503 | CA  | PHE | B | 641 | 3.540  | 10.873 | -5.350 | 1.00 | 0.00 | C | C |
| ATOM | 13504 | CB  | PHE | B | 641 | 2.995  | 12.308 | -5.246 | 1.00 | 0.00 | C | C |
| ATOM | 13505 | CG  | PHE | B | 641 | 2.229  | 12.381 | -3.974 | 1.00 | 0.00 | C | C |
| ATOM | 13506 | CD1 | PHE | B | 641 | 0.888  | 12.069 | -3.970 | 1.00 | 0.00 | C | C |
| ATOM | 13507 | CE1 | PHE | B | 641 | 0.157  | 12.124 | -2.811 | 1.00 | 0.00 | C | C |
| ATOM | 13508 | CZ  | PHE | B | 641 | 0.760  | 12.488 | -1.634 | 1.00 | 0.00 | C | C |



|      |       |               |        |        |         |      |      |   |   |
|------|-------|---------------|--------|--------|---------|------|------|---|---|
| ATOM | 13509 | CD2 PHE B 641 | 2.832  | 12.740 | -2.792  | 1.00 | 0.00 | C | C |
| ATOM | 13510 | CE2 PHE B 641 | 2.099  | 12.796 | -1.628  | 1.00 | 0.00 | C | C |
| ATOM | 13511 | C PHE B 641   | 3.645  | 10.512 | -6.799  | 1.00 | 0.00 | C | C |
| ATOM | 13512 | O PHE B 641   | 2.727  | 9.909  | -7.354  | 1.00 | 0.00 | C | O |
| ATOM | 13513 | N THR B 642   | 4.758  | 10.875 | -7.461  | 1.00 | 0.00 | C | N |
| ATOM | 13514 | CA THR B 642  | 4.896  | 10.608 | -8.867  | 1.00 | 0.00 | C | C |
| ATOM | 13515 | CB THR B 642  | 6.119  | 11.238 | -9.457  | 1.00 | 0.00 | C | C |
| ATOM | 13516 | OG1 THR B 642 | 7.303  | 10.647 | -8.949  | 1.00 | 0.00 | C | O |
| ATOM | 13517 | CG2 THR B 642 | 6.078  | 12.718 | -9.057  | 1.00 | 0.00 | C | C |
| ATOM | 13518 | C THR B 642   | 4.932  | 9.128  | -9.094  | 1.00 | 0.00 | C | C |
| ATOM | 13519 | O THR B 642   | 4.395  | 8.623  | -10.078 | 1.00 | 0.00 | C | O |
| ATOM | 13520 | N ILE B 643   | 5.561  | 8.398  | -8.157  | 1.00 | 0.00 | C | N |
| ATOM | 13521 | CA ILE B 643  | 5.686  | 6.969  | -8.188  | 1.00 | 0.00 | C | C |
| ATOM | 13522 | CB ILE B 643  | 6.378  | 6.430  | -6.965  | 1.00 | 0.00 | C | C |
| ATOM | 13523 | CG2 ILE B 643 | 6.364  | 4.895  | -7.046  | 1.00 | 0.00 | C | C |
| ATOM | 13524 | CG1 ILE B 643 | 7.792  | 7.018  | -6.832  | 1.00 | 0.00 | C | C |
| ATOM | 13525 | CD ILE B 643  | 8.426  | 6.767  | -5.463  | 1.00 | 0.00 | C | C |
| ATOM | 13526 | C ILE B 643   | 4.297  | 6.413  | -8.175  | 1.00 | 0.00 | C | C |
| ATOM | 13527 | O ILE B 643   | 4.031  | 5.362  | -8.756  | 1.00 | 0.00 | C | O |
| ATOM | 13528 | N GLY B 644   | 3.367  | 7.105  | -7.484  | 1.00 | 0.00 | C | N |
| ATOM | 13529 | CA GLY B 644  | 2.011  | 6.642  | -7.433  | 1.00 | 0.00 | C | C |
| ATOM | 13530 | C GLY B 644   | 1.677  | 6.175  | -6.054  | 1.00 | 0.00 | C | C |
| ATOM | 13531 | O GLY B 644   | 0.549  | 5.759  | -5.794  | 1.00 | 0.00 | C | O |
| ATOM | 13532 | N MET B 645   | 2.650  | 6.211  | -5.127  | 1.00 | 0.00 | C | N |
| ATOM | 13533 | CA MET B 645  | 2.328  | 5.821  | -3.787  | 1.00 | 0.00 | C | C |
| ATOM | 13534 | CB MET B 645  | 3.354  | 4.843  | -3.189  | 1.00 | 0.00 | C | C |
| ATOM | 13535 | CG MET B 645  | 4.787  | 5.377  | -3.220  | 1.00 | 0.00 | C | C |
| ATOM | 13536 | SD MET B 645  | 6.032  | 4.206  | -2.603  | 1.00 | 0.00 | C | S |
| ATOM | 13537 | CE MET B 645  | 5.808  | 3.042  | -3.978  | 1.00 | 0.00 | C | C |
| ATOM | 13538 | C MET B 645   | 2.306  | 7.063  | -2.956  | 1.00 | 0.00 | C | C |
| ATOM | 13539 | O MET B 645   | 3.278  | 7.816  | -2.925  | 1.00 | 0.00 | C | O |
| ATOM | 13540 | N GLY B 646   | 1.179  | 7.317  | -2.261  | 1.00 | 0.00 | C | N |
| ATOM | 13541 | CA GLY B 646  | 1.111  | 8.504  | -1.455  | 1.00 | 0.00 | C | C |
| ATOM | 13542 | C GLY B 646   | -0.106 | 8.450  | -0.587  | 1.00 | 0.00 | C | C |
| ATOM | 13543 | O GLY B 646   | -1.046 | 7.697  | -0.836  | 1.00 | 0.00 | C | O |
| ATOM | 13544 | N ASP B 647   | -0.096 | 9.268  | 0.486   | 1.00 | 0.00 | C | N |
| ATOM | 13545 | CA ASP B 647  | -1.212 | 9.382  | 1.382   | 1.00 | 0.00 | C | C |
| ATOM | 13546 | CB ASP B 647  | -0.810 | 9.362  | 2.862   | 1.00 | 0.00 | C | C |

|      |       |     |           |        |        |        |      |      |   |   |
|------|-------|-----|-----------|--------|--------|--------|------|------|---|---|
| ATOM | 13547 | CG  | ASP B 647 | -0.195 | 8.023  | 3.229  | 1.00 | 0.00 | C | C |
| ATOM | 13548 | OD1 | ASP B 647 | -0.470 | 7.019  | 2.520  | 1.00 | 0.00 | C | O |
| ATOM | 13549 | OD2 | ASP B 647 | 0.570  | 7.994  | 4.231  | 1.00 | 0.00 | C | O |
| ATOM | 13550 | C   | ASP B 647 | -1.783 | 10.737 | 1.103  | 1.00 | 0.00 | C | C |
| ATOM | 13551 | O   | ASP B 647 | -1.056 | 11.729 | 1.092  | 1.00 | 0.00 | C | O |
| ATOM | 13552 | N   | LEU B 648 | -3.109 | 10.834 | 0.879  | 1.00 | 0.00 | C | N |
| ATOM | 13553 | CA  | LEU B 648 | -3.621 | 12.104 | 0.448  | 1.00 | 0.00 | C | C |
| ATOM | 13554 | CB  | LEU B 648 | -4.484 | 12.038 | -0.827 | 1.00 | 0.00 | C | C |
| ATOM | 13555 | CG  | LEU B 648 | -3.717 | 11.699 | -2.118 | 1.00 | 0.00 | C | C |
| ATOM | 13556 | CD1 | LEU B 648 | -2.690 | 12.789 | -2.448 | 1.00 | 0.00 | C | C |
| ATOM | 13557 | CD2 | LEU B 648 | -3.114 | 10.288 | -2.077 | 1.00 | 0.00 | C | C |
| ATOM | 13558 | C   | LEU B 648 | -4.470 | 12.780 | 1.478  | 1.00 | 0.00 | C | C |
| ATOM | 13559 | O   | LEU B 648 | -5.058 | 12.165 | 2.364  | 1.00 | 0.00 | C | O |
| ATOM | 13560 | N   | GLU B 649 | -4.510 | 14.123 | 1.349  | 1.00 | 0.00 | C | N |
| ATOM | 13561 | CA  | GLU B 649 | -5.351 | 15.033 | 2.071  | 1.00 | 0.00 | C | C |
| ATOM | 13562 | CB  | GLU B 649 | -6.840 | 14.890 | 1.708  | 1.00 | 0.00 | C | C |
| ATOM | 13563 | CG  | GLU B 649 | -7.164 | 15.265 | 0.262  | 1.00 | 0.00 | C | C |
| ATOM | 13564 | CD  | GLU B 649 | -6.974 | 16.765 | 0.119  | 1.00 | 0.00 | C | C |
| ATOM | 13565 | OE1 | GLU B 649 | -5.812 | 17.189 | -0.129 | 1.00 | 0.00 | C | O |
| ATOM | 13566 | OE2 | GLU B 649 | -7.982 | 17.505 | 0.261  | 1.00 | 0.00 | C | O |
| ATOM | 13567 | C   | GLU B 649 | -5.251 | 14.888 | 3.557  | 1.00 | 0.00 | C | C |
| ATOM | 13568 | O   | GLU B 649 | -6.275 | 14.955 | 4.234  | 1.00 | 0.00 | C | O |
| ATOM | 13569 | N   | PHE B 650 | -4.040 | 14.713 | 4.124  | 1.00 | 0.00 | C | N |
| ATOM | 13570 | CA  | PHE B 650 | -4.001 | 14.675 | 5.564  | 1.00 | 0.00 | C | C |
| ATOM | 13571 | CB  | PHE B 650 | -2.601 | 14.564 | 6.185  | 1.00 | 0.00 | C | C |
| ATOM | 13572 | CG  | PHE B 650 | -2.050 | 13.203 | 5.986  | 1.00 | 0.00 | C | C |
| ATOM | 13573 | CD1 | PHE B 650 | -1.331 | 12.917 | 4.855  | 1.00 | 0.00 | C | C |
| ATOM | 13574 | CE1 | PHE B 650 | -0.812 | 11.662 | 4.675  | 1.00 | 0.00 | C | C |
| ATOM | 13575 | CZ  | PHE B 650 | -1.005 | 10.680 | 5.617  | 1.00 | 0.00 | C | C |
| ATOM | 13576 | CD2 | PHE B 650 | -2.242 | 12.222 | 6.933  | 1.00 | 0.00 | C | C |
| ATOM | 13577 | CE2 | PHE B 650 | -1.726 | 10.962 | 6.751  | 1.00 | 0.00 | C | C |
| ATOM | 13578 | C   | PHE B 650 | -4.488 | 16.008 | 6.027  | 1.00 | 0.00 | C | C |
| ATOM | 13579 | O   | PHE B 650 | -5.352 | 16.113 | 6.896  | 1.00 | 0.00 | C | O |
| ATOM | 13580 | N   | THR B 651 | -3.911 | 17.070 | 5.440  | 1.00 | 0.00 | C | N |
| ATOM | 13581 | CA  | THR B 651 | -4.313 | 18.423 | 5.694  | 1.00 | 0.00 | C | C |
| ATOM | 13582 | CB  | THR B 651 | -5.807 | 18.553 | 5.657  | 1.00 | 0.00 | C | C |
| ATOM | 13583 | OG1 | THR B 651 | -6.300 | 18.159 | 4.389  | 1.00 | 0.00 | C | O |
| ATOM | 13584 | CG2 | THR B 651 | -6.217 | 19.999 | 5.988  | 1.00 | 0.00 | C | C |

|      |       |     |           |        |        |        |      |      |   |   |
|------|-------|-----|-----------|--------|--------|--------|------|------|---|---|
| ATOM | 13585 | C   | THR B 651 | -3.892 | 18.877 | 7.054  | 1.00 | 0.00 | C | C |
| ATOM | 13586 | O   | THR B 651 | -3.802 | 20.081 | 7.285  | 1.00 | 0.00 | C | O |
| ATOM | 13587 | N   | GLU B 652 | -3.461 | 17.964 | 7.936  | 1.00 | 0.00 | C | N |
| ATOM | 13588 | CA  | GLU B 652 | -3.218 | 18.396 | 9.282  | 1.00 | 0.00 | C | C |
| ATOM | 13589 | CB  | GLU B 652 | -2.793 | 17.249 | 10.197 | 1.00 | 0.00 | C | C |
| ATOM | 13590 | CG  | GLU B 652 | -3.824 | 16.130 | 10.218 | 1.00 | 0.00 | C | C |
| ATOM | 13591 | CD  | GLU B 652 | -3.290 | 15.079 | 11.162 | 1.00 | 0.00 | C | C |
| ATOM | 13592 | OE1 | GLU B 652 | -3.543 | 15.237 | 12.383 | 1.00 | 0.00 | C | O |
| ATOM | 13593 | OE2 | GLU B 652 | -2.619 | 14.122 | 10.691 | 1.00 | 0.00 | C | O |
| ATOM | 13594 | C   | GLU B 652 | -2.130 | 19.417 | 9.314  | 1.00 | 0.00 | C | C |
| ATOM | 13595 | O   | GLU B 652 | -1.069 | 19.237 | 8.719  | 1.00 | 0.00 | C | O |
| ATOM | 13596 | N   | ASN B 653 | -2.383 | 20.519 | 10.051 | 1.00 | 0.00 | C | N |
| ATOM | 13597 | CA  | ASN B 653 | -1.453 | 21.606 | 10.180 | 1.00 | 0.00 | C | C |
| ATOM | 13598 | CB  | ASN B 653 | -0.092 | 21.133 | 10.691 | 1.00 | 0.00 | C | C |
| ATOM | 13599 | CG  | ASN B 653 | -0.375 | 20.374 | 11.965 | 1.00 | 0.00 | C | C |
| ATOM | 13600 | OD1 | ASN B 653 | -0.588 | 20.953 | 13.024 | 1.00 | 0.00 | C | O |
| ATOM | 13601 | ND2 | ASN B 653 | -0.410 | 19.020 | 11.839 | 1.00 | 0.00 | C | N |
| ATOM | 13602 | C   | ASN B 653 | -1.202 | 22.225 | 8.840  | 1.00 | 0.00 | C | C |
| ATOM | 13603 | O   | ASN B 653 | -0.076 | 22.626 | 8.545  | 1.00 | 0.00 | C | O |
| ATOM | 13604 | N   | TYR B 654 | -2.242 | 22.347 | 7.995  | 1.00 | 0.00 | C | N |
| ATOM | 13605 | CA  | TYR B 654 | -2.011 | 22.920 | 6.697  | 1.00 | 0.00 | C | C |
| ATOM | 13606 | CB  | TYR B 654 | -2.364 | 21.997 | 5.511  | 1.00 | 0.00 | C | C |
| ATOM | 13607 | CG  | TYR B 654 | -1.288 | 20.977 | 5.312  | 1.00 | 0.00 | C | C |
| ATOM | 13608 | CD1 | TYR B 654 | -0.184 | 21.263 | 4.549  | 1.00 | 0.00 | C | C |
| ATOM | 13609 | CE1 | TYR B 654 | 0.801  | 20.322 | 4.362  | 1.00 | 0.00 | C | C |
| ATOM | 13610 | CZ  | TYR B 654 | 0.698  | 19.077 | 4.933  | 1.00 | 0.00 | C | C |
| ATOM | 13611 | OH  | TYR B 654 | 1.713  | 18.117 | 4.735  | 1.00 | 0.00 | C | O |
| ATOM | 13612 | CD2 | TYR B 654 | -1.369 | 19.728 | 5.873  | 1.00 | 0.00 | C | C |
| ATOM | 13613 | CE2 | TYR B 654 | -0.396 | 18.774 | 5.700  | 1.00 | 0.00 | C | C |
| ATOM | 13614 | C   | TYR B 654 | -2.805 | 24.178 | 6.526  | 1.00 | 0.00 | C | C |
| ATOM | 13615 | O   | TYR B 654 | -3.978 | 24.267 | 6.887  | 1.00 | 0.00 | C | O |
| ATOM | 13616 | N   | ASP B 655 | -2.137 | 25.196 | 5.954  | 1.00 | 0.00 | C | N |
| ATOM | 13617 | CA  | ASP B 655 | -2.694 | 26.486 | 5.694  | 1.00 | 0.00 | C | C |
| ATOM | 13618 | CB  | ASP B 655 | -1.753 | 27.654 | 6.011  | 1.00 | 0.00 | C | C |
| ATOM | 13619 | CG  | ASP B 655 | -1.623 | 27.732 | 7.521  | 1.00 | 0.00 | C | C |
| ATOM | 13620 | OD1 | ASP B 655 | -2.080 | 26.778 | 8.205  | 1.00 | 0.00 | C | O |
| ATOM | 13621 | OD2 | ASP B 655 | -1.076 | 28.752 | 8.010  | 1.00 | 0.00 | C | O |
| ATOM | 13622 | C   | ASP B 655 | -2.979 | 26.555 | 4.242  | 1.00 | 0.00 | C | C |

|      |       |     |           |        |        |        |      |      |   |   |
|------|-------|-----|-----------|--------|--------|--------|------|------|---|---|
| ATOM | 13623 | O   | ASP B 655 | -2.206 | 26.070 | 3.415  | 1.00 | 0.00 | C | O |
| ATOM | 13624 | N   | PHE B 656 | -4.095 | 27.216 | 3.898  | 1.00 | 0.00 | C | N |
| ATOM | 13625 | CA  | PHE B 656 | -4.474 | 27.269 | 2.529  | 1.00 | 0.00 | C | C |
| ATOM | 13626 | CB  | PHE B 656 | -3.373 | 27.839 | 1.629  | 1.00 | 0.00 | C | C |
| ATOM | 13627 | CG  | PHE B 656 | -2.399 | 28.526 | 2.511  | 1.00 | 0.00 | C | C |
| ATOM | 13628 | CD1 | PHE B 656 | -2.657 | 29.778 | 3.011  | 1.00 | 0.00 | C | C |
| ATOM | 13629 | CE1 | PHE B 656 | -1.739 | 30.398 | 3.824  | 1.00 | 0.00 | C | C |
| ATOM | 13630 | CZ  | PHE B 656 | -0.562 | 29.761 | 4.139  | 1.00 | 0.00 | C | C |
| ATOM | 13631 | CD2 | PHE B 656 | -1.218 | 27.895 | 2.828  | 1.00 | 0.00 | C | C |
| ATOM | 13632 | CE2 | PHE B 656 | -0.298 | 28.509 | 3.641  | 1.00 | 0.00 | C | C |
| ATOM | 13633 | C   | PHE B 656 | -4.621 | 25.856 | 2.122  | 1.00 | 0.00 | C | C |
| ATOM | 13634 | O   | PHE B 656 | -4.179 | 25.487 | 1.047  | 1.00 | 0.00 | C | O |
| ATOM | 13635 | N   | LYS B 657 | -5.187 | 24.999 | 2.983  | 1.00 | 0.00 | C | N |
| ATOM | 13636 | CA  | LYS B 657 | -5.340 | 23.624 | 2.618  | 1.00 | 0.00 | C | C |
| ATOM | 13637 | CB  | LYS B 657 | -5.859 | 22.720 | 3.739  | 1.00 | 0.00 | C | C |
| ATOM | 13638 | CG  | LYS B 657 | -5.742 | 21.243 | 3.362  | 1.00 | 0.00 | C | C |
| ATOM | 13639 | CD  | LYS B 657 | -4.287 | 20.784 | 3.254  | 1.00 | 0.00 | C | C |
| ATOM | 13640 | CE  | LYS B 657 | -4.122 | 19.310 | 2.883  | 1.00 | 0.00 | C | C |
| ATOM | 13641 | NZ  | LYS B 657 | -2.687 | 18.947 | 2.908  | 1.00 | 0.00 | C | N |
| ATOM | 13642 | C   | LYS B 657 | -6.323 | 23.537 | 1.507  | 1.00 | 0.00 | C | C |
| ATOM | 13643 | O   | LYS B 657 | -6.215 | 22.677 | 0.642  | 1.00 | 0.00 | C | O |
| ATOM | 13644 | N   | ALA B 658 | -7.345 | 24.401 | 1.507  | 1.00 | 0.00 | C | N |
| ATOM | 13645 | CA  | ALA B 658 | -8.283 | 24.313 | 0.431  | 1.00 | 0.00 | C | C |
| ATOM | 13646 | CB  | ALA B 658 | -9.421 | 25.339 | 0.539  | 1.00 | 0.00 | C | C |
| ATOM | 13647 | C   | ALA B 658 | -7.539 | 24.608 | -0.829 | 1.00 | 0.00 | C | C |
| ATOM | 13648 | O   | ALA B 658 | -7.734 | 23.936 | -1.842 | 1.00 | 0.00 | C | O |
| ATOM | 13649 | N   | VAL B 659 | -6.666 | 25.635 | -0.809 | 1.00 | 0.00 | C | N |
| ATOM | 13650 | CA  | VAL B 659 | -5.942 | 25.935 | -2.007 | 1.00 | 0.00 | C | C |
| ATOM | 13651 | CB  | VAL B 659 | -5.147 | 27.218 | -2.004 | 1.00 | 0.00 | C | C |
| ATOM | 13652 | CG1 | VAL B 659 | -6.064 | 28.385 | -1.618 | 1.00 | 0.00 | C | C |
| ATOM | 13653 | CG2 | VAL B 659 | -3.874 | 27.055 | -1.167 | 1.00 | 0.00 | C | C |
| ATOM | 13654 | C   | VAL B 659 | -4.960 | 24.830 | -2.258 | 1.00 | 0.00 | C | C |
| ATOM | 13655 | O   | VAL B 659 | -4.663 | 24.499 | -3.400 | 1.00 | 0.00 | C | O |
| ATOM | 13656 | N   | PHE B 660 | -4.409 | 24.264 | -1.171 | 1.00 | 0.00 | C | N |
| ATOM | 13657 | CA  | PHE B 660 | -3.369 | 23.275 | -1.142 | 1.00 | 0.00 | C | C |
| ATOM | 13658 | CB  | PHE B 660 | -2.870 | 22.975 | 0.287  | 1.00 | 0.00 | C | C |
| ATOM | 13659 | CG  | PHE B 660 | -1.809 | 21.921 | 0.232  | 1.00 | 0.00 | C | C |
| ATOM | 13660 | CD1 | PHE B 660 | -2.143 | 20.586 | 0.248  | 1.00 | 0.00 | C | C |

|      |       |               |        |        |        |      |      |   |   |
|------|-------|---------------|--------|--------|--------|------|------|---|---|
| ATOM | 13661 | CE1 PHE B 660 | -1.174 | 19.609 | 0.201  | 1.00 | 0.00 | C | C |
| ATOM | 13662 | CZ PHE B 660  | 0.151  | 19.962 | 0.140  | 1.00 | 0.00 | C | C |
| ATOM | 13663 | CD2 PHE B 660 | -0.477 | 22.266 | 0.173  | 1.00 | 0.00 | C | C |
| ATOM | 13664 | CE2 PHE B 660 | 0.496  | 21.292 | 0.128  | 1.00 | 0.00 | C | C |
| ATOM | 13665 | C PHE B 660   | -3.828 | 21.994 | -1.738 | 1.00 | 0.00 | C | C |
| ATOM | 13666 | O PHE B 660   | -3.146 | 21.402 | -2.566 | 1.00 | 0.00 | C | O |
| ATOM | 13667 | N ILE B 661   | -5.019 | 21.542 | -1.335 | 1.00 | 0.00 | C | N |
| ATOM | 13668 | CA ILE B 661  | -5.573 | 20.304 | -1.773 | 1.00 | 0.00 | C | C |
| ATOM | 13669 | CB ILE B 661  | -6.902 | 20.066 | -1.120 | 1.00 | 0.00 | C | C |
| ATOM | 13670 | CG2 ILE B 661 | -6.671 | 19.906 | 0.393  | 1.00 | 0.00 | C | C |
| ATOM | 13671 | CG1 ILE B 661 | -7.851 | 21.220 | -1.475 | 1.00 | 0.00 | C | C |
| ATOM | 13672 | CD ILE B 661  | -9.265 | 21.066 | -0.946 | 1.00 | 0.00 | C | C |
| ATOM | 13673 | C ILE B 661   | -5.723 | 20.412 | -3.248 | 1.00 | 0.00 | C | C |
| ATOM | 13674 | O ILE B 661   | -5.386 | 19.488 | -3.984 | 1.00 | 0.00 | C | O |
| ATOM | 13675 | N ILE B 662   | -6.189 | 21.576 | -3.722 | 1.00 | 0.00 | C | N |
| ATOM | 13676 | CA ILE B 662  | -6.387 | 21.773 | -5.121 | 1.00 | 0.00 | C | C |
| ATOM | 13677 | CB ILE B 662  | -6.955 | 23.129 | -5.409 | 1.00 | 0.00 | C | C |
| ATOM | 13678 | CG2 ILE B 662 | -7.066 | 23.290 | -6.933 | 1.00 | 0.00 | C | C |
| ATOM | 13679 | CG1 ILE B 662 | -8.298 | 23.280 | -4.676 | 1.00 | 0.00 | C | C |
| ATOM | 13680 | CD ILE B 662  | -8.779 | 24.722 | -4.570 | 1.00 | 0.00 | C | C |
| ATOM | 13681 | C ILE B 662   | -5.057 | 21.658 | -5.796 | 1.00 | 0.00 | C | C |
| ATOM | 13682 | O ILE B 662   | -4.940 | 21.053 | -6.860 | 1.00 | 0.00 | C | O |
| ATOM | 13683 | N LEU B 663   | -4.012 | 22.233 | -5.176 | 1.00 | 0.00 | C | N |
| ATOM | 13684 | CA LEU B 663  | -2.690 | 22.239 | -5.731 | 1.00 | 0.00 | C | C |
| ATOM | 13685 | CB LEU B 663  | -1.731 | 23.064 | -4.848 | 1.00 | 0.00 | C | C |
| ATOM | 13686 | CG LEU B 663  | -0.276 | 23.150 | -5.343 | 1.00 | 0.00 | C | C |
| ATOM | 13687 | CD1 LEU B 663 | 0.479  | 21.829 | -5.125 | 1.00 | 0.00 | C | C |
| ATOM | 13688 | CD2 LEU B 663 | -0.221 | 23.631 | -6.799 | 1.00 | 0.00 | C | C |
| ATOM | 13689 | C LEU B 663   | -2.202 | 20.825 | -5.845 | 1.00 | 0.00 | C | C |
| ATOM | 13690 | O LEU B 663   | -1.570 | 20.448 | -6.833 | 1.00 | 0.00 | C | O |
| ATOM | 13691 | N LEU B 664   | -2.485 | 19.998 | -4.824 | 1.00 | 0.00 | C | N |
| ATOM | 13692 | CA LEU B 664  | -2.027 | 18.642 | -4.801 | 1.00 | 0.00 | C | C |
| ATOM | 13693 | CB LEU B 664  | -2.328 | 17.996 | -3.435 | 1.00 | 0.00 | C | C |
| ATOM | 13694 | CG LEU B 664  | -1.625 | 16.655 | -3.181 | 1.00 | 0.00 | C | C |
| ATOM | 13695 | CD1 LEU B 664 | -2.159 | 15.557 | -4.106 | 1.00 | 0.00 | C | C |
| ATOM | 13696 | CD2 LEU B 664 | -0.097 | 16.806 | -3.253 | 1.00 | 0.00 | C | C |
| ATOM | 13697 | C LEU B 664   | -2.702 | 17.889 | -5.904 | 1.00 | 0.00 | C | C |
| ATOM | 13698 | O LEU B 664   | -2.073 | 17.100 | -6.611 | 1.00 | 0.00 | C | O |

|      |       |     |           |        |        |         |      |      |   |   |
|------|-------|-----|-----------|--------|--------|---------|------|------|---|---|
| ATOM | 13699 | N   | LEU B 665 | -4.013 | 18.129 | -6.101  | 1.00 | 0.00 | C | N |
| ATOM | 13700 | CA  | LEU B 665 | -4.712 | 17.447 | -7.149  | 1.00 | 0.00 | C | C |
| ATOM | 13701 | CB  | LEU B 665 | -6.228 | 17.703 | -7.165  | 1.00 | 0.00 | C | C |
| ATOM | 13702 | CG  | LEU B 665 | -7.011 | 16.858 | -6.135  | 1.00 | 0.00 | C | C |
| ATOM | 13703 | CD1 | LEU B 665 | -6.560 | 17.121 | -4.692  | 1.00 | 0.00 | C | C |
| ATOM | 13704 | CD2 | LEU B 665 | -8.525 | 17.028 | -6.319  | 1.00 | 0.00 | C | C |
| ATOM | 13705 | C   | LEU B 665 | -4.138 | 17.839 | -8.470  | 1.00 | 0.00 | C | C |
| ATOM | 13706 | O   | LEU B 665 | -3.974 | 16.995 | -9.349  | 1.00 | 0.00 | C | O |
| ATOM | 13707 | N   | ALA B 666 | -3.808 | 19.130 | -8.656  | 1.00 | 0.00 | C | N |
| ATOM | 13708 | CA  | ALA B 666 | -3.303 | 19.562 | -9.926  | 1.00 | 0.00 | C | C |
| ATOM | 13709 | CB  | ALA B 666 | -3.061 | 21.080 | -9.976  | 1.00 | 0.00 | C | C |
| ATOM | 13710 | C   | ALA B 666 | -1.991 | 18.898 | -10.231 | 1.00 | 0.00 | C | C |
| ATOM | 13711 | O   | ALA B 666 | -1.796 | 18.384 | -11.330 | 1.00 | 0.00 | C | O |
| ATOM | 13712 | N   | TYR B 667 | -1.051 | 18.899 | -9.266  | 1.00 | 0.00 | C | N |
| ATOM | 13713 | CA  | TYR B 667 | 0.252  | 18.353 | -9.520  | 1.00 | 0.00 | C | C |
| ATOM | 13714 | CB  | TYR B 667 | 1.264  | 18.719 | -8.421  | 1.00 | 0.00 | C | C |
| ATOM | 13715 | CG  | TYR B 667 | 2.556  | 18.055 | -8.744  | 1.00 | 0.00 | C | C |
| ATOM | 13716 | CD1 | TYR B 667 | 3.281  | 18.433 | -9.849  | 1.00 | 0.00 | C | C |
| ATOM | 13717 | CE1 | TYR B 667 | 4.480  | 17.831 | -10.145 | 1.00 | 0.00 | C | C |
| ATOM | 13718 | CZ  | TYR B 667 | 4.969  | 16.844 | -9.329  | 1.00 | 0.00 | C | C |
| ATOM | 13719 | OH  | TYR B 667 | 6.200  | 16.227 | -9.634  | 1.00 | 0.00 | C | O |
| ATOM | 13720 | CD2 | TYR B 667 | 3.056  | 17.065 | -7.928  | 1.00 | 0.00 | C | C |
| ATOM | 13721 | CE2 | TYR B 667 | 4.255  | 16.459 | -8.219  | 1.00 | 0.00 | C | C |
| ATOM | 13722 | C   | TYR B 667 | 0.220  | 16.864 | -9.652  | 1.00 | 0.00 | C | C |
| ATOM | 13723 | O   | TYR B 667 | 0.780  | 16.308 | -10.595 | 1.00 | 0.00 | C | O |
| ATOM | 13724 | N   | VAL B 668 | -0.442 | 16.176 | -8.709  | 1.00 | 0.00 | C | N |
| ATOM | 13725 | CA  | VAL B 668 | -0.421 | 14.744 | -8.728  | 1.00 | 0.00 | C | C |
| ATOM | 13726 | CB  | VAL B 668 | -1.083 | 14.125 | -7.534  | 1.00 | 0.00 | C | C |
| ATOM | 13727 | CG1 | VAL B 668 | -1.072 | 12.598 | -7.713  | 1.00 | 0.00 | C | C |
| ATOM | 13728 | CG2 | VAL B 668 | -0.362 | 14.614 | -6.266  | 1.00 | 0.00 | C | C |
| ATOM | 13729 | C   | VAL B 668 | -1.126 | 14.230 | -9.939  | 1.00 | 0.00 | C | C |
| ATOM | 13730 | O   | VAL B 668 | -0.615 | 13.357 | -10.640 | 1.00 | 0.00 | C | O |
| ATOM | 13731 | N   | ILE B 669 | -2.319 | 14.775 | -10.239 | 1.00 | 0.00 | C | N |
| ATOM | 13732 | CA  | ILE B 669 | -3.066 | 14.207 | -11.321 | 1.00 | 0.00 | C | C |
| ATOM | 13733 | CB  | ILE B 669 | -4.454 | 14.783 | -11.477 | 1.00 | 0.00 | C | C |
| ATOM | 13734 | CG2 | ILE B 669 | -5.172 | 14.561 | -10.132 | 1.00 | 0.00 | C | C |
| ATOM | 13735 | CG1 | ILE B 669 | -4.464 | 16.251 | -11.942 | 1.00 | 0.00 | C | C |
| ATOM | 13736 | CD  | ILE B 669 | -4.321 | 16.422 | -13.456 | 1.00 | 0.00 | C | C |

|      |       |     |           |        |        |         |      |      |   |   |
|------|-------|-----|-----------|--------|--------|---------|------|------|---|---|
| ATOM | 13737 | C   | ILE B 669 | -2.287 | 14.395 | -12.580 | 1.00 | 0.00 | C | C |
| ATOM | 13738 | O   | ILE B 669 | -2.146 | 13.468 | -13.373 | 1.00 | 0.00 | C | O |
| ATOM | 13739 | N   | LEU B 670 | -1.721 | 15.597 | -12.776 | 1.00 | 0.00 | C | N |
| ATOM | 13740 | CA  | LEU B 670 | -1.020 | 15.887 | -13.992 | 1.00 | 0.00 | C | C |
| ATOM | 13741 | CB  | LEU B 670 | -0.451 | 17.319 | -14.010 | 1.00 | 0.00 | C | C |
| ATOM | 13742 | CG  | LEU B 670 | 0.485  | 17.599 | -15.203 | 1.00 | 0.00 | C | C |
| ATOM | 13743 | CD1 | LEU B 670 | -0.257 | 17.460 | -16.539 | 1.00 | 0.00 | C | C |
| ATOM | 13744 | CD2 | LEU B 670 | 1.202  | 18.952 | -15.060 | 1.00 | 0.00 | C | C |
| ATOM | 13745 | C   | LEU B 670 | 0.147  | 14.968 | -14.136 | 1.00 | 0.00 | C | C |
| ATOM | 13746 | O   | LEU B 670 | 0.347  | 14.371 | -15.193 | 1.00 | 0.00 | C | O |
| ATOM | 13747 | N   | THR B 671 | 0.939  | 14.805 | -13.059 | 1.00 | 0.00 | C | N |
| ATOM | 13748 | CA  | THR B 671 | 2.146  | 14.045 | -13.209 | 1.00 | 0.00 | C | C |
| ATOM | 13749 | CB  | THR B 671 | 3.046  | 14.040 | -12.003 | 1.00 | 0.00 | C | C |
| ATOM | 13750 | OG1 | THR B 671 | 2.496  | 13.276 | -10.942 | 1.00 | 0.00 | C | O |
| ATOM | 13751 | CG2 | THR B 671 | 3.224  | 15.491 | -11.550 | 1.00 | 0.00 | C | C |
| ATOM | 13752 | C   | THR B 671 | 1.824  | 12.627 | -13.526 | 1.00 | 0.00 | C | C |
| ATOM | 13753 | O   | THR B 671 | 2.446  | 12.020 | -14.395 | 1.00 | 0.00 | C | O |
| ATOM | 13754 | N   | TYR B 672 | 0.848  | 12.046 | -12.815 | 1.00 | 0.00 | C | N |
| ATOM | 13755 | CA  | TYR B 672 | 0.544  | 10.671 | -13.069 | 1.00 | 0.00 | C | C |
| ATOM | 13756 | CB  | TYR B 672 | -0.491 | 10.114 | -12.072 | 1.00 | 0.00 | C | C |
| ATOM | 13757 | CG  | TYR B 672 | -0.767 | 8.685  | -12.401 | 1.00 | 0.00 | C | C |
| ATOM | 13758 | CD1 | TYR B 672 | 0.135  | 7.694  | -12.075 | 1.00 | 0.00 | C | C |
| ATOM | 13759 | CE1 | TYR B 672 | -0.129 | 6.379  | -12.377 | 1.00 | 0.00 | C | C |
| ATOM | 13760 | CZ  | TYR B 672 | -1.308 | 6.040  | -13.005 | 1.00 | 0.00 | C | C |
| ATOM | 13761 | OH  | TYR B 672 | -1.588 | 4.692  | -13.321 | 1.00 | 0.00 | C | O |
| ATOM | 13762 | CD2 | TYR B 672 | -1.944 | 8.333  | -13.016 | 1.00 | 0.00 | C | C |
| ATOM | 13763 | CE2 | TYR B 672 | -2.214 | 7.019  | -13.321 | 1.00 | 0.00 | C | C |
| ATOM | 13764 | C   | TYR B 672 | -0.009 | 10.572 | -14.446 | 1.00 | 0.00 | C | C |
| ATOM | 13765 | O   | TYR B 672 | 0.377  | 9.706  | -15.231 | 1.00 | 0.00 | C | O |
| ATOM | 13766 | N   | ILE B 673 | -0.940 | 11.483 | -14.778 | 1.00 | 0.00 | C | N |
| ATOM | 13767 | CA  | ILE B 673 | -1.602 | 11.360 | -16.030 | 1.00 | 0.00 | C | C |
| ATOM | 13768 | CB  | ILE B 673 | -2.850 | 12.194 | -16.093 | 1.00 | 0.00 | C | C |
| ATOM | 13769 | CG2 | ILE B 673 | -2.480 | 13.686 | -16.095 | 1.00 | 0.00 | C | C |
| ATOM | 13770 | CG1 | ILE B 673 | -3.699 | 11.746 | -17.285 | 1.00 | 0.00 | C | C |
| ATOM | 13771 | CD  | ILE B 673 | -4.216 | 10.315 | -17.135 | 1.00 | 0.00 | C | C |
| ATOM | 13772 | C   | ILE B 673 | -0.730 | 11.653 | -17.220 | 1.00 | 0.00 | C | C |
| ATOM | 13773 | O   | ILE B 673 | -0.674 | 10.840 | -18.138 | 1.00 | 0.00 | C | O |
| ATOM | 13774 | N   | LEU B 674 | -0.071 | 12.831 | -17.287 | 1.00 | 0.00 | C | N |

|            |     |           |        |        |         |      |      |   |   |
|------------|-----|-----------|--------|--------|---------|------|------|---|---|
| ATOM 13775 | CA  | LEU B 674 | 0.685  | 13.139 | -18.474 | 1.00 | 0.00 | C | C |
| ATOM 13776 | CB  | LEU B 674 | 0.806  | 14.651 | -18.712 | 1.00 | 0.00 | C | C |
| ATOM 13777 | CG  | LEU B 674 | -0.568 | 15.315 | -18.904 | 1.00 | 0.00 | C | C |
| ATOM 13778 | CD1 | LEU B 674 | -0.424 | 16.759 | -19.401 | 1.00 | 0.00 | C | C |
| ATOM 13779 | CD2 | LEU B 674 | -1.481 | 14.460 | -19.795 | 1.00 | 0.00 | C | C |
| ATOM 13780 | C   | LEU B 674 | 2.066  | 12.547 | -18.557 | 1.00 | 0.00 | C | C |
| ATOM 13781 | O   | LEU B 674 | 2.399  | 11.867 | -19.525 | 1.00 | 0.00 | C | O |
| ATOM 13782 | N   | LEU B 675 | 2.903  | 12.789 | -17.529 | 1.00 | 0.00 | C | N |
| ATOM 13783 | CA  | LEU B 675 | 4.301  | 12.437 | -17.577 | 1.00 | 0.00 | C | C |
| ATOM 13784 | CB  | LEU B 675 | 5.058  | 12.914 | -16.324 | 1.00 | 0.00 | C | C |
| ATOM 13785 | CG  | LEU B 675 | 5.391  | 14.416 | -16.287 | 1.00 | 0.00 | C | C |
| ATOM 13786 | CD1 | LEU B 675 | 6.495  | 14.757 | -17.302 | 1.00 | 0.00 | C | C |
| ATOM 13787 | CD2 | LEU B 675 | 4.132  | 15.279 | -16.456 | 1.00 | 0.00 | C | C |
| ATOM 13788 | C   | LEU B 675 | 4.531  | 10.965 | -17.645 | 1.00 | 0.00 | C | C |
| ATOM 13789 | O   | LEU B 675 | 5.203  | 10.474 | -18.551 | 1.00 | 0.00 | C | O |
| ATOM 13790 | N   | LEU B 676 | 3.960  | 10.218 | -16.687 | 1.00 | 0.00 | C | N |
| ATOM 13791 | CA  | LEU B 676 | 4.254  | 8.819  | -16.621 | 1.00 | 0.00 | C | C |
| ATOM 13792 | CB  | LEU B 676 | 3.666  | 8.121  | -15.385 | 1.00 | 0.00 | C | C |
| ATOM 13793 | CG  | LEU B 676 | 4.406  | 8.481  | -14.087 | 1.00 | 0.00 | C | C |
| ATOM 13794 | CD1 | LEU B 676 | 5.864  | 7.990  | -14.149 | 1.00 | 0.00 | C | C |
| ATOM 13795 | CD2 | LEU B 676 | 4.286  | 9.974  | -13.748 | 1.00 | 0.00 | C | C |
| ATOM 13796 | C   | LEU B 676 | 3.728  | 8.140  | -17.831 | 1.00 | 0.00 | C | C |
| ATOM 13797 | O   | LEU B 676 | 4.431  | 7.342  | -18.447 | 1.00 | 0.00 | C | O |
| ATOM 13798 | N   | ASN B 677 | 2.482  | 8.457  | -18.216 | 1.00 | 0.00 | C | N |
| ATOM 13799 | CA  | ASN B 677 | 1.881  | 7.827  | -19.348 | 1.00 | 0.00 | C | C |
| ATOM 13800 | CB  | ASN B 677 | 0.423  | 8.269  | -19.558 | 1.00 | 0.00 | C | C |
| ATOM 13801 | CG  | ASN B 677 | -0.359 | 7.833  | -18.328 | 1.00 | 0.00 | C | C |
| ATOM 13802 | OD1 | ASN B 677 | 0.128  | 7.046  | -17.519 | 1.00 | 0.00 | C | O |
| ATOM 13803 | ND2 | ASN B 677 | -1.608 | 8.348  | -18.181 | 1.00 | 0.00 | C | N |
| ATOM 13804 | C   | ASN B 677 | 2.656  | 8.222  | -20.560 | 1.00 | 0.00 | C | C |
| ATOM 13805 | O   | ASN B 677 | 2.911  | 7.399  | -21.437 | 1.00 | 0.00 | C | O |
| ATOM 13806 | N   | MET B 678 | 3.054  | 9.504  | -20.635 | 1.00 | 0.00 | C | N |
| ATOM 13807 | CA  | MET B 678 | 3.777  | 10.000 | -21.768 | 1.00 | 0.00 | C | C |
| ATOM 13808 | CB  | MET B 678 | 4.107  | 11.497 | -21.639 | 1.00 | 0.00 | C | C |
| ATOM 13809 | CG  | MET B 678 | 4.953  | 12.063 | -22.782 | 1.00 | 0.00 | C | C |
| ATOM 13810 | SD  | MET B 678 | 5.140  | 13.873 | -22.742 | 1.00 | 0.00 | C | S |
| ATOM 13811 | CE  | MET B 678 | 6.079  | 13.914 | -21.188 | 1.00 | 0.00 | C | C |
| ATOM 13812 | C   | MET B 678 | 5.077  | 9.277  | -21.887 | 1.00 | 0.00 | C | C |



|      |       |     |           |        |       |         |      |      |   |   |
|------|-------|-----|-----------|--------|-------|---------|------|------|---|---|
| ATOM | 13813 | O   | MET B 678 | 5.447  | 8.845 | -22.976 | 1.00 | 0.00 | C | O |
| ATOM | 13814 | N   | LEU B 679 | 5.818  | 9.115 | -20.772 | 1.00 | 0.00 | C | N |
| ATOM | 13815 | CA  | LEU B 679 | 7.085  | 8.460 | -20.904 | 1.00 | 0.00 | C | C |
| ATOM | 13816 | CB  | LEU B 679 | 7.975  | 8.544 | -19.640 | 1.00 | 0.00 | C | C |
| ATOM | 13817 | CG  | LEU B 679 | 7.826  | 7.421 | -18.591 | 1.00 | 0.00 | C | C |
| ATOM | 13818 | CD1 | LEU B 679 | 8.533  | 6.123 | -19.022 | 1.00 | 0.00 | C | C |
| ATOM | 13819 | CD2 | LEU B 679 | 8.292  | 7.902 | -17.206 | 1.00 | 0.00 | C | C |
| ATOM | 13820 | C   | LEU B 679 | 6.854  | 7.022 | -21.256 | 1.00 | 0.00 | C | C |
| ATOM | 13821 | O   | LEU B 679 | 7.519  | 6.476 | -22.135 | 1.00 | 0.00 | C | O |
| ATOM | 13822 | N   | ILE B 680 | 5.875  | 6.385 | -20.584 | 1.00 | 0.00 | C | N |
| ATOM | 13823 | CA  | ILE B 680 | 5.595  | 4.984 | -20.742 | 1.00 | 0.00 | C | C |
| ATOM | 13824 | CB  | ILE B 680 | 4.536  | 4.484 | -19.801 | 1.00 | 0.00 | C | C |
| ATOM | 13825 | CG2 | ILE B 680 | 4.228  | 3.023 | -20.168 | 1.00 | 0.00 | C | C |
| ATOM | 13826 | CG1 | ILE B 680 | 4.990  | 4.664 | -18.339 | 1.00 | 0.00 | C | C |
| ATOM | 13827 | CD  | ILE B 680 | 6.287  | 3.934 | -18.001 | 1.00 | 0.00 | C | C |
| ATOM | 13828 | C   | ILE B 680 | 5.147  | 4.715 | -22.143 | 1.00 | 0.00 | C | C |
| ATOM | 13829 | O   | ILE B 680 | 5.509  | 3.699 | -22.734 | 1.00 | 0.00 | C | O |
| ATOM | 13830 | N   | ALA B 681 | 4.330  | 5.619 | -22.709 | 1.00 | 0.00 | C | N |
| ATOM | 13831 | CA  | ALA B 681 | 3.829  | 5.454 | -24.040 | 1.00 | 0.00 | C | C |
| ATOM | 13832 | CB  | ALA B 681 | 2.926  | 6.617 | -24.490 | 1.00 | 0.00 | C | C |
| ATOM | 13833 | C   | ALA B 681 | 5.013  | 5.426 | -24.947 | 1.00 | 0.00 | C | C |
| ATOM | 13834 | O   | ALA B 681 | 5.055  | 4.671 | -25.916 | 1.00 | 0.00 | C | O |
| ATOM | 13835 | N   | LEU B 682 | 6.012  | 6.261 | -24.625 | 1.00 | 0.00 | C | N |
| ATOM | 13836 | CA  | LEU B 682 | 7.225  | 6.391 | -25.376 | 1.00 | 0.00 | C | C |
| ATOM | 13837 | CB  | LEU B 682 | 8.185  | 7.414 | -24.738 | 1.00 | 0.00 | C | C |
| ATOM | 13838 | CG  | LEU B 682 | 7.647  | 8.856 | -24.680 | 1.00 | 0.00 | C | C |
| ATOM | 13839 | CD1 | LEU B 682 | 8.642  | 9.788 | -23.969 | 1.00 | 0.00 | C | C |
| ATOM | 13840 | CD2 | LEU B 682 | 7.268  | 9.365 | -26.081 | 1.00 | 0.00 | C | C |
| ATOM | 13841 | C   | LEU B 682 | 7.955  | 5.076 | -25.349 | 1.00 | 0.00 | C | C |
| ATOM | 13842 | O   | LEU B 682 | 8.560  | 4.676 | -26.344 | 1.00 | 0.00 | C | O |
| ATOM | 13843 | N   | MET B 683 | 7.892  | 4.359 | -24.210 | 1.00 | 0.00 | C | N |
| ATOM | 13844 | CA  | MET B 683 | 8.649  | 3.157 | -23.973 | 1.00 | 0.00 | C | C |
| ATOM | 13845 | CB  | MET B 683 | 8.314  | 2.507 | -22.614 | 1.00 | 0.00 | C | C |
| ATOM | 13846 | CG  | MET B 683 | 8.721  | 3.302 | -21.370 | 1.00 | 0.00 | C | C |
| ATOM | 13847 | SD  | MET B 683 | 10.490 | 3.239 | -20.957 | 1.00 | 0.00 | C | S |
| ATOM | 13848 | CE  | MET B 683 | 10.258 | 3.722 | -19.220 | 1.00 | 0.00 | C | C |
| ATOM | 13849 | C   | MET B 683 | 8.342  | 2.103 | -24.996 | 1.00 | 0.00 | C | C |
| ATOM | 13850 | O   | MET B 683 | 9.248  | 1.436 | -25.495 | 1.00 | 0.00 | C | O |

|      |       |     |           |        |        |         |      |      |   |   |
|------|-------|-----|-----------|--------|--------|---------|------|------|---|---|
| ATOM | 13851 | N   | GLY B 684 | 7.063  | 1.925  | -25.363 | 1.00 | 0.00 | C | N |
| ATOM | 13852 | CA  | GLY B 684 | 6.725  | 0.836  | -26.233 | 1.00 | 0.00 | C | C |
| ATOM | 13853 | C   | GLY B 684 | 7.463  | 0.957  | -27.529 | 1.00 | 0.00 | C | C |
| ATOM | 13854 | O   | GLY B 684 | 7.933  | -0.040 | -28.071 | 1.00 | 0.00 | C | O |
| ATOM | 13855 | N   | GLU B 685 | 7.598  | 2.183  | -28.055 | 1.00 | 0.00 | C | N |
| ATOM | 13856 | CA  | GLU B 685 | 8.188  | 2.390  | -29.347 | 1.00 | 0.00 | C | C |
| ATOM | 13857 | CB  | GLU B 685 | 8.265  | 3.883  | -29.694 | 1.00 | 0.00 | C | C |
| ATOM | 13858 | CG  | GLU B 685 | 6.896  | 4.554  | -29.789 | 1.00 | 0.00 | C | C |
| ATOM | 13859 | CD  | GLU B 685 | 7.119  | 6.060  | -29.796 | 1.00 | 0.00 | C | C |
| ATOM | 13860 | OE1 | GLU B 685 | 7.359  | 6.624  | -28.694 | 1.00 | 0.00 | C | O |
| ATOM | 13861 | OE2 | GLU B 685 | 7.058  | 6.666  | -30.897 | 1.00 | 0.00 | C | O |
| ATOM | 13862 | C   | GLU B 685 | 9.594  | 1.881  | -29.357 | 1.00 | 0.00 | C | C |
| ATOM | 13863 | O   | GLU B 685 | 10.002 | 1.196  | -30.294 | 1.00 | 0.00 | C | O |
| ATOM | 13864 | N   | THR B 686 | 10.372 | 2.202  | -28.307 | 1.00 | 0.00 | C | N |
| ATOM | 13865 | CA  | THR B 686 | 11.748 | 1.802  | -28.264 | 1.00 | 0.00 | C | C |
| ATOM | 13866 | CB  | THR B 686 | 12.473 | 2.303  | -27.047 | 1.00 | 0.00 | C | C |
| ATOM | 13867 | OG1 | THR B 686 | 11.912 | 1.736  | -25.871 | 1.00 | 0.00 | C | O |
| ATOM | 13868 | CG2 | THR B 686 | 12.363 | 3.835  | -27.007 | 1.00 | 0.00 | C | C |
| ATOM | 13869 | C   | THR B 686 | 11.810 | 0.314  | -28.228 | 1.00 | 0.00 | C | C |
| ATOM | 13870 | O   | THR B 686 | 12.640 | -0.296 | -28.900 | 1.00 | 0.00 | C | O |
| ATOM | 13871 | N   | VAL B 687 | 10.932 | -0.306 | -27.417 | 1.00 | 0.00 | C | N |
| ATOM | 13872 | CA  | VAL B 687 | 10.901 | -1.733 | -27.297 | 1.00 | 0.00 | C | C |
| ATOM | 13873 | CB  | VAL B 687 | 9.929  | -2.217 | -26.259 | 1.00 | 0.00 | C | C |
| ATOM | 13874 | CG1 | VAL B 687 | 9.867  | -3.752 | -26.331 | 1.00 | 0.00 | C | C |
| ATOM | 13875 | CG2 | VAL B 687 | 10.369 | -1.680 | -24.888 | 1.00 | 0.00 | C | C |
| ATOM | 13876 | C   | VAL B 687 | 10.494 | -2.338 | -28.609 | 1.00 | 0.00 | C | C |
| ATOM | 13877 | O   | VAL B 687 | 11.049 | -3.348 | -29.036 | 1.00 | 0.00 | C | O |
| ATOM | 13878 | N   | ASN B 688 | 9.492  | -1.748 | -29.281 | 1.00 | 0.00 | C | N |
| ATOM | 13879 | CA  | ASN B 688 | 9.025  | -2.304 | -30.519 | 1.00 | 0.00 | C | C |
| ATOM | 13880 | CB  | ASN B 688 | 7.783  | -1.586 | -31.081 | 1.00 | 0.00 | C | C |
| ATOM | 13881 | CG  | ASN B 688 | 6.548  | -2.078 | -30.338 | 1.00 | 0.00 | C | C |
| ATOM | 13882 | OD1 | ASN B 688 | 6.087  | -3.197 | -30.561 | 1.00 | 0.00 | C | O |
| ATOM | 13883 | ND2 | ASN B 688 | 5.991  | -1.230 | -29.436 | 1.00 | 0.00 | C | N |
| ATOM | 13884 | C   | ASN B 688 | 10.088 | -2.213 | -31.563 | 1.00 | 0.00 | C | C |
| ATOM | 13885 | O   | ASN B 688 | 10.357 | -3.187 | -32.264 | 1.00 | 0.00 | C | O |
| ATOM | 13886 | N   | LYS B 689 | 10.728 | -1.037 | -31.698 | 1.00 | 0.00 | C | N |
| ATOM | 13887 | CA  | LYS B 689 | 11.689 | -0.901 | -32.747 | 1.00 | 0.00 | C | C |
| ATOM | 13888 | CB  | LYS B 689 | 12.164 | 0.536  | -33.015 | 1.00 | 0.00 | C | C |

|      |       |     |     |   |     |        |        |         |      |      |   |   |
|------|-------|-----|-----|---|-----|--------|--------|---------|------|------|---|---|
| ATOM | 13889 | CG  | LYS | B | 689 | 13.044 | 1.176  | -31.946 | 1.00 | 0.00 | C | C |
| ATOM | 13890 | CD  | LYS | B | 689 | 13.734 | 2.424  | -32.501 | 1.00 | 0.00 | C | C |
| ATOM | 13891 | CE  | LYS | B | 689 | 14.411 | 3.307  | -31.455 | 1.00 | 0.00 | C | C |
| ATOM | 13892 | NZ  | LYS | B | 689 | 14.910 | 4.541  | -32.102 | 1.00 | 0.00 | C | N |
| ATOM | 13893 | C   | LYS | B | 689 | 12.866 | -1.778 | -32.476 | 1.00 | 0.00 | C | C |
| ATOM | 13894 | O   | LYS | B | 689 | 13.423 | -2.371 | -33.398 | 1.00 | 0.00 | C | O |
| ATOM | 13895 | N   | ILE | B | 690 | 13.272 | -1.893 | -31.201 | 1.00 | 0.00 | C | N |
| ATOM | 13896 | CA  | ILE | B | 690 | 14.402 | -2.727 | -30.916 | 1.00 | 0.00 | C | C |
| ATOM | 13897 | CB  | ILE | B | 690 | 14.874 | -2.694 | -29.493 | 1.00 | 0.00 | C | C |
| ATOM | 13898 | CG2 | ILE | B | 690 | 13.716 | -3.025 | -28.551 | 1.00 | 0.00 | C | C |
| ATOM | 13899 | CG1 | ILE | B | 690 | 16.086 | -3.624 | -29.352 | 1.00 | 0.00 | C | C |
| ATOM | 13900 | CD  | ILE | B | 690 | 16.786 | -3.487 | -28.008 | 1.00 | 0.00 | C | C |
| ATOM | 13901 | C   | ILE | B | 690 | 14.079 | -4.135 | -31.291 | 1.00 | 0.00 | C | C |
| ATOM | 13902 | O   | ILE | B | 690 | 14.947 | -4.860 | -31.773 | 1.00 | 0.00 | C | O |
| ATOM | 13903 | N   | ALA | B | 691 | 12.828 | -4.569 | -31.051 | 1.00 | 0.00 | C | N |
| ATOM | 13904 | CA  | ALA | B | 691 | 12.432 | -5.915 | -31.363 | 1.00 | 0.00 | C | C |
| ATOM | 13905 | CB  | ALA | B | 691 | 10.980 | -6.209 | -30.951 | 1.00 | 0.00 | C | C |
| ATOM | 13906 | C   | ALA | B | 691 | 12.541 | -6.161 | -32.841 | 1.00 | 0.00 | C | C |
| ATOM | 13907 | O   | ALA | B | 691 | 13.037 | -7.203 | -33.264 | 1.00 | 0.00 | C | O |
| ATOM | 13908 | N   | GLN | B | 692 | 12.088 | -5.207 | -33.680 | 1.00 | 0.00 | C | N |
| ATOM | 13909 | CA  | GLN | B | 692 | 12.115 | -5.411 | -35.105 | 1.00 | 0.00 | C | C |
| ATOM | 13910 | CB  | GLN | B | 692 | 11.584 | -4.198 | -35.876 | 1.00 | 0.00 | C | C |
| ATOM | 13911 | CG  | GLN | B | 692 | 10.160 | -3.786 | -35.524 | 1.00 | 0.00 | C | C |
| ATOM | 13912 | CD  | GLN | B | 692 | 9.945  | -2.454 | -36.215 | 1.00 | 0.00 | C | C |
| ATOM | 13913 | OE1 | GLN | B | 692 | 10.286 | -2.306 | -37.386 | 1.00 | 0.00 | C | O |
| ATOM | 13914 | NE2 | GLN | B | 692 | 9.400  | -1.453 | -35.472 | 1.00 | 0.00 | C | N |
| ATOM | 13915 | C   | GLN | B | 692 | 13.541 | -5.526 | -35.537 | 1.00 | 0.00 | C | C |
| ATOM | 13916 | O   | GLN | B | 692 | 13.910 | -6.387 | -36.337 | 1.00 | 0.00 | C | O |
| ATOM | 13917 | N   | GLU | B | 693 | 14.370 | -4.626 | -34.992 | 1.00 | 0.00 | C | N |
| ATOM | 13918 | CA  | GLU | B | 693 | 15.765 | -4.487 | -35.279 | 1.00 | 0.00 | C | C |
| ATOM | 13919 | CB  | GLU | B | 693 | 16.358 | -3.221 | -34.636 | 1.00 | 0.00 | C | C |
| ATOM | 13920 | CG  | GLU | B | 693 | 15.781 | -1.925 | -35.213 | 1.00 | 0.00 | C | C |
| ATOM | 13921 | CD  | GLU | B | 693 | 16.276 | -0.760 | -34.367 | 1.00 | 0.00 | C | C |
| ATOM | 13922 | OE1 | GLU | B | 693 | 15.683 | -0.523 | -33.277 | 1.00 | 0.00 | C | O |
| ATOM | 13923 | OE2 | GLU | B | 693 | 17.252 | -0.090 | -34.794 | 1.00 | 0.00 | C | O |
| ATOM | 13924 | C   | GLU | B | 693 | 16.532 | -5.659 | -34.754 | 1.00 | 0.00 | C | C |
| ATOM | 13925 | O   | GLU | B | 693 | 17.558 | -6.005 | -35.324 | 1.00 | 0.00 | C | O |
| ATOM | 13926 | N   | SER | B | 694 | 16.028 | -6.333 | -33.704 | 1.00 | 0.00 | C | N |

|      |       |     |           |        |         |         |      |      |   |   |
|------|-------|-----|-----------|--------|---------|---------|------|------|---|---|
| ATOM | 13927 | CA  | SER B 694 | 16.695 | -7.320  | -32.890 | 1.00 | 0.00 | C | C |
| ATOM | 13928 | CB  | SER B 694 | 15.679 | -8.141  | -32.078 | 1.00 | 0.00 | C | C |
| ATOM | 13929 | OG  | SER B 694 | 15.078 | -7.338  | -31.079 | 1.00 | 0.00 | C | O |
| ATOM | 13930 | C   | SER B 694 | 17.480 | -8.321  | -33.661 | 1.00 | 0.00 | C | C |
| ATOM | 13931 | O   | SER B 694 | 18.601 | -8.631  | -33.261 | 1.00 | 0.00 | C | O |
| ATOM | 13932 | N   | LYS B 695 | 16.931 | -8.887  | -34.745 | 1.00 | 0.00 | C | N |
| ATOM | 13933 | CA  | LYS B 695 | 17.723 | -9.856  | -35.446 | 1.00 | 0.00 | C | C |
| ATOM | 13934 | CB  | LYS B 695 | 17.041 | -10.357 | -36.729 | 1.00 | 0.00 | C | C |
| ATOM | 13935 | CG  | LYS B 695 | 15.889 | -11.335 | -36.511 | 1.00 | 0.00 | C | C |
| ATOM | 13936 | CD  | LYS B 695 | 16.343 | -12.680 | -35.948 | 1.00 | 0.00 | C | C |
| ATOM | 13937 | CE  | LYS B 695 | 15.282 | -13.774 | -36.063 | 1.00 | 0.00 | C | C |
| ATOM | 13938 | NZ  | LYS B 695 | 15.893 | -15.088 | -35.772 | 1.00 | 0.00 | C | N |
| ATOM | 13939 | C   | LYS B 695 | 18.967 | -9.151  | -35.891 | 1.00 | 0.00 | C | C |
| ATOM | 13940 | O   | LYS B 695 | 20.084 | -9.608  | -35.650 | 1.00 | 0.00 | C | O |
| ATOM | 13941 | N   | ASN B 696 | 18.769 | -7.970  | -36.495 | 1.00 | 0.00 | C | N |
| ATOM | 13942 | CA  | ASN B 696 | 19.779 | -7.114  | -37.048 | 1.00 | 0.00 | C | C |
| ATOM | 13943 | CB  | ASN B 696 | 19.159 | -5.907  | -37.769 | 1.00 | 0.00 | C | C |
| ATOM | 13944 | CG  | ASN B 696 | 18.152 | -6.424  | -38.787 | 1.00 | 0.00 | C | C |
| ATOM | 13945 | OD1 | ASN B 696 | 18.417 | -7.371  | -39.526 | 1.00 | 0.00 | C | O |
| ATOM | 13946 | ND2 | ASN B 696 | 16.946 | -5.795  | -38.809 | 1.00 | 0.00 | C | N |
| ATOM | 13947 | C   | ASN B 696 | 20.693 | -6.538  | -36.000 | 1.00 | 0.00 | C | C |
| ATOM | 13948 | O   | ASN B 696 | 21.913 | -6.570  | -36.148 | 1.00 | 0.00 | C | O |
| ATOM | 13949 | N   | ILE B 697 | 20.121 | -5.978  | -34.916 | 1.00 | 0.00 | C | N |
| ATOM | 13950 | CA  | ILE B 697 | 20.863 | -5.328  | -33.873 | 1.00 | 0.00 | C | C |
| ATOM | 13951 | CB  | ILE B 697 | 19.975 | -4.707  | -32.841 | 1.00 | 0.00 | C | C |
| ATOM | 13952 | CG2 | ILE B 697 | 19.163 | -3.574  | -33.494 | 1.00 | 0.00 | C | C |
| ATOM | 13953 | CG1 | ILE B 697 | 19.115 | -5.800  | -32.202 | 1.00 | 0.00 | C | C |
| ATOM | 13954 | CD  | ILE B 697 | 18.345 | -5.332  | -30.985 | 1.00 | 0.00 | C | C |
| ATOM | 13955 | C   | ILE B 697 | 21.731 | -6.342  | -33.209 | 1.00 | 0.00 | C | C |
| ATOM | 13956 | O   | ILE B 697 | 22.896 | -6.083  | -32.911 | 1.00 | 0.00 | C | O |
| ATOM | 13957 | N   | TRP B 698 | 21.176 | -7.544  | -32.994 | 1.00 | 0.00 | C | N |
| ATOM | 13958 | CA  | TRP B 698 | 21.894 | -8.606  | -32.374 | 1.00 | 0.00 | C | C |
| ATOM | 13959 | CB  | TRP B 698 | 21.098 | -9.919  | -32.426 | 1.00 | 0.00 | C | C |
| ATOM | 13960 | CG  | TRP B 698 | 21.911 | -11.171 | -32.205 | 1.00 | 0.00 | C | C |
| ATOM | 13961 | CD1 | TRP B 698 | 22.319 | -11.753 | -31.048 | 1.00 | 0.00 | C | C |
| ATOM | 13962 | NE1 | TRP B 698 | 22.998 | -12.917 | -31.319 | 1.00 | 0.00 | C | N |
| ATOM | 13963 | CE2 | TRP B 698 | 23.045 | -13.089 | -32.684 | 1.00 | 0.00 | C | C |
| ATOM | 13964 | CD2 | TRP B 698 | 22.379 | -12.013 | -33.271 | 1.00 | 0.00 | C | C |

|      |       |               |        |         |         |      |      |   |   |
|------|-------|---------------|--------|---------|---------|------|------|---|---|
| ATOM | 13965 | CE3 TRP B 698 | 22.261 | -11.906 | -34.626 | 1.00 | 0.00 | C | C |
| ATOM | 13966 | CZ3 TRP B 698 | 22.828 | -12.900 | -35.391 | 1.00 | 0.00 | C | C |
| ATOM | 13967 | CZ2 TRP B 698 | 23.603 | -14.075 | -33.444 | 1.00 | 0.00 | C | C |
| ATOM | 13968 | CH2 TRP B 698 | 23.485 | -13.963 | -34.810 | 1.00 | 0.00 | C | C |
| ATOM | 13969 | C TRP B 698   | 23.106 | -8.830  | -33.201 | 1.00 | 0.00 | C | C |
| ATOM | 13970 | O TRP B 698   | 24.199 | -9.021  | -32.673 | 1.00 | 0.00 | C | O |
| ATOM | 13971 | N LYS B 699   | 22.926 | -8.819  | -34.531 | 1.00 | 0.00 | C | N |
| ATOM | 13972 | CA LYS B 699  | 24.001 | -9.147  | -35.415 | 1.00 | 0.00 | C | C |
| ATOM | 13973 | CB LYS B 699  | 23.551 | -9.326  | -36.877 | 1.00 | 0.00 | C | C |
| ATOM | 13974 | CG LYS B 699  | 24.432 | -10.303 | -37.668 | 1.00 | 0.00 | C | C |
| ATOM | 13975 | CD LYS B 699  | 25.932 | -9.997  | -37.653 | 1.00 | 0.00 | C | C |
| ATOM | 13976 | CE LYS B 699  | 26.776 | -11.090 | -38.318 | 1.00 | 0.00 | C | C |
| ATOM | 13977 | NZ LYS B 699  | 28.219 | -10.825 | -38.113 | 1.00 | 0.00 | C | N |
| ATOM | 13978 | C LYS B 699   | 25.118 | -8.130  | -35.398 | 1.00 | 0.00 | C | C |
| ATOM | 13979 | O LYS B 699   | 26.285 | -8.512  | -35.351 | 1.00 | 0.00 | C | O |
| ATOM | 13980 | N LEU B 700   | 24.812 | -6.814  | -35.435 | 1.00 | 0.00 | C | N |
| ATOM | 13981 | CA LEU B 700  | 25.855 | -5.821  | -35.573 | 1.00 | 0.00 | C | C |
| ATOM | 13982 | CB LEU B 700  | 25.317 | -4.412  | -35.909 | 1.00 | 0.00 | C | C |
| ATOM | 13983 | CG LEU B 700  | 24.594 | -3.639  | -34.783 | 1.00 | 0.00 | C | C |
| ATOM | 13984 | CD1 LEU B 700 | 25.568 | -3.076  | -33.734 | 1.00 | 0.00 | C | C |
| ATOM | 13985 | CD2 LEU B 700 | 23.692 | -2.546  | -35.373 | 1.00 | 0.00 | C | C |
| ATOM | 13986 | C LEU B 700   | 26.757 | -5.739  | -34.378 | 1.00 | 0.00 | C | C |
| ATOM | 13987 | O LEU B 700   | 27.979 | -5.658  | -34.524 | 1.00 | 0.00 | C | O |
| ATOM | 13988 | N GLN B 701   | 26.173 | -5.762  | -33.167 | 1.00 | 0.00 | C | N |
| ATOM | 13989 | CA GLN B 701  | 26.864 | -5.628  | -31.912 | 1.00 | 0.00 | C | C |
| ATOM | 13990 | CB GLN B 701  | 25.922 | -5.489  | -30.711 | 1.00 | 0.00 | C | C |
| ATOM | 13991 | CG GLN B 701  | 25.043 | -6.707  | -30.455 | 1.00 | 0.00 | C | C |
| ATOM | 13992 | CD GLN B 701  | 24.197 | -6.364  | -29.241 | 1.00 | 0.00 | C | C |
| ATOM | 13993 | OE1 GLN B 701 | 24.303 | -5.259  | -28.706 | 1.00 | 0.00 | C | O |
| ATOM | 13994 | NE2 GLN B 701 | 23.338 | -7.315  | -28.791 | 1.00 | 0.00 | C | N |
| ATOM | 13995 | C GLN B 701   | 27.749 | -6.809  | -31.695 | 1.00 | 0.00 | C | C |
| ATOM | 13996 | O GLN B 701   | 28.823 | -6.691  | -31.106 | 1.00 | 0.00 | C | O |
| ATOM | 13997 | N ARG B 702   | 27.310 | -7.995  | -32.138 | 1.00 | 0.00 | C | N |
| ATOM | 13998 | CA ARG B 702  | 28.125 | -9.150  | -31.935 | 1.00 | 0.00 | C | C |
| ATOM | 13999 | CB ARG B 702  | 27.447 | -10.451 | -32.408 | 1.00 | 0.00 | C | C |
| ATOM | 14000 | CG ARG B 702  | 28.285 | -11.709 | -32.157 | 1.00 | 0.00 | C | C |
| ATOM | 14001 | CD ARG B 702  | 27.456 | -12.985 | -31.982 | 1.00 | 0.00 | C | C |
| ATOM | 14002 | NE ARG B 702  | 26.987 | -13.459 | -33.313 | 1.00 | 0.00 | C | N |

|      |       |     |           |        |         |         |      |      |   |   |
|------|-------|-----|-----------|--------|---------|---------|------|------|---|---|
| ATOM | 14003 | CZ  | ARG B 702 | 26.478 | -14.720 | -33.416 | 1.00 | 0.00 | C | C |
| ATOM | 14004 | NH1 | ARG B 702 | 26.387 | -15.507 | -32.302 | 1.00 | 0.00 | C | N |
| ATOM | 14005 | NH2 | ARG B 702 | 26.050 | -15.198 | -34.618 | 1.00 | 0.00 | C | N |
| ATOM | 14006 | C   | ARG B 702 | 29.408 | -8.936  | -32.683 | 1.00 | 0.00 | C | C |
| ATOM | 14007 | O   | ARG B 702 | 30.487 | -9.196  | -32.157 | 1.00 | 0.00 | C | O |
| ATOM | 14008 | N   | ALA B 703 | 29.333 | -8.393  | -33.911 | 1.00 | 0.00 | C | N |
| ATOM | 14009 | CA  | ALA B 703 | 30.514 | -8.204  | -34.704 | 1.00 | 0.00 | C | C |
| ATOM | 14010 | CB  | ALA B 703 | 30.231 | -7.555  | -36.069 | 1.00 | 0.00 | C | C |
| ATOM | 14011 | C   | ALA B 703 | 31.447 | -7.299  | -33.969 | 1.00 | 0.00 | C | C |
| ATOM | 14012 | O   | ALA B 703 | 32.661 | -7.494  | -33.984 | 1.00 | 0.00 | C | O |
| ATOM | 14013 | N   | ILE B 704 | 30.902 | -6.264  | -33.308 | 1.00 | 0.00 | C | N |
| ATOM | 14014 | CA  | ILE B 704 | 31.731 | -5.349  | -32.585 | 1.00 | 0.00 | C | C |
| ATOM | 14015 | CB  | ILE B 704 | 30.960 | -4.232  | -31.944 | 1.00 | 0.00 | C | C |
| ATOM | 14016 | CG2 | ILE B 704 | 31.920 | -3.451  | -31.034 | 1.00 | 0.00 | C | C |
| ATOM | 14017 | CG1 | ILE B 704 | 30.283 | -3.362  | -33.014 | 1.00 | 0.00 | C | C |
| ATOM | 14018 | CD  | ILE B 704 | 29.274 | -2.370  | -32.434 | 1.00 | 0.00 | C | C |
| ATOM | 14019 | C   | ILE B 704 | 32.423 | -6.090  | -31.485 | 1.00 | 0.00 | C | C |
| ATOM | 14020 | O   | ILE B 704 | 33.612 | -5.885  | -31.247 | 1.00 | 0.00 | C | O |
| ATOM | 14021 | N   | THR B 705 | 31.696 | -6.977  | -30.777 | 1.00 | 0.00 | C | N |
| ATOM | 14022 | CA  | THR B 705 | 32.305 | -7.648  | -29.665 | 1.00 | 0.00 | C | C |
| ATOM | 14023 | CB  | THR B 705 | 31.368 | -8.502  | -28.855 | 1.00 | 0.00 | C | C |
| ATOM | 14024 | OG1 | THR B 705 | 31.945 | -8.760  | -27.584 | 1.00 | 0.00 | C | O |
| ATOM | 14025 | CG2 | THR B 705 | 31.124 | -9.839  | -29.574 | 1.00 | 0.00 | C | C |
| ATOM | 14026 | C   | THR B 705 | 33.425 | -8.504  | -30.167 | 1.00 | 0.00 | C | C |
| ATOM | 14027 | O   | THR B 705 | 34.471 | -8.595  | -29.529 | 1.00 | 0.00 | C | O |
| ATOM | 14028 | N   | ILE B 706 | 33.230 | -9.162  | -31.325 | 1.00 | 0.00 | C | N |
| ATOM | 14029 | CA  | ILE B 706 | 34.241 | -10.026 | -31.860 | 1.00 | 0.00 | C | C |
| ATOM | 14030 | CB  | ILE B 706 | 33.772 | -10.798 | -33.056 | 1.00 | 0.00 | C | C |
| ATOM | 14031 | CG2 | ILE B 706 | 34.990 | -11.481 | -33.696 | 1.00 | 0.00 | C | C |
| ATOM | 14032 | CG1 | ILE B 706 | 32.649 | -11.769 | -32.646 | 1.00 | 0.00 | C | C |
| ATOM | 14033 | CD  | ILE B 706 | 31.936 | -12.436 | -33.820 | 1.00 | 0.00 | C | C |
| ATOM | 14034 | C   | ILE B 706 | 35.453 | -9.243  | -32.255 | 1.00 | 0.00 | C | C |
| ATOM | 14035 | O   | ILE B 706 | 36.579 | -9.638  | -31.969 | 1.00 | 0.00 | C | O |
| ATOM | 14036 | N   | LEU B 707 | 35.262 | -8.097  | -32.934 | 1.00 | 0.00 | C | N |
| ATOM | 14037 | CA  | LEU B 707 | 36.397 | -7.376  | -33.432 | 1.00 | 0.00 | C | C |
| ATOM | 14038 | CB  | LEU B 707 | 36.013 | -6.369  | -34.524 | 1.00 | 0.00 | C | C |
| ATOM | 14039 | CG  | LEU B 707 | 35.420 | -7.184  | -35.695 | 1.00 | 0.00 | C | C |
| ATOM | 14040 | CD1 | LEU B 707 | 35.305 | -6.394  | -37.005 | 1.00 | 0.00 | C | C |

|      |       |     |     |   |     |        |         |         |      |      |   |   |
|------|-------|-----|-----|---|-----|--------|---------|---------|------|------|---|---|
| ATOM | 14041 | CD2 | LEU | B | 707 | 36.183 | -8.509  | -35.854 | 1.00 | 0.00 | C | C |
| ATOM | 14042 | C   | LEU | B | 707 | 37.231 | -6.803  | -32.323 | 1.00 | 0.00 | C | C |
| ATOM | 14043 | O   | LEU | B | 707 | 38.458 | -6.803  | -32.408 | 1.00 | 0.00 | C | O |
| ATOM | 14044 | N   | ASP | B | 708 | 36.604 | -6.317  | -31.236 | 1.00 | 0.00 | C | N |
| ATOM | 14045 | CA  | ASP | B | 708 | 37.369 | -5.754  | -30.155 | 1.00 | 0.00 | C | C |
| ATOM | 14046 | CB  | ASP | B | 708 | 36.476 | -5.224  | -29.020 | 1.00 | 0.00 | C | C |
| ATOM | 14047 | CG  | ASP | B | 708 | 35.702 | -4.015  | -29.529 | 1.00 | 0.00 | C | C |
| ATOM | 14048 | OD1 | ASP | B | 708 | 36.012 | -3.543  | -30.656 | 1.00 | 0.00 | C | O |
| ATOM | 14049 | OD2 | ASP | B | 708 | 34.792 | -3.544  | -28.795 | 1.00 | 0.00 | C | O |
| ATOM | 14050 | C   | ASP | B | 708 | 38.245 | -6.821  | -29.573 | 1.00 | 0.00 | C | C |
| ATOM | 14051 | O   | ASP | B | 708 | 39.425 | -6.594  | -29.310 | 1.00 | 0.00 | C | O |
| ATOM | 14052 | N   | THR | B | 709 | 37.693 | -8.033  | -29.368 | 1.00 | 0.00 | C | N |
| ATOM | 14053 | CA  | THR | B | 709 | 38.475 | -9.076  | -28.764 | 1.00 | 0.00 | C | C |
| ATOM | 14054 | CB  | THR | B | 709 | 37.701 | -10.327 | -28.454 | 1.00 | 0.00 | C | C |
| ATOM | 14055 | OG1 | THR | B | 709 | 38.477 | -11.177 | -27.619 | 1.00 | 0.00 | C | O |
| ATOM | 14056 | CG2 | THR | B | 709 | 37.362 | -11.059 | -29.762 | 1.00 | 0.00 | C | C |
| ATOM | 14057 | C   | THR | B | 709 | 39.592 | -9.433  | -29.690 | 1.00 | 0.00 | C | C |
| ATOM | 14058 | O   | THR | B | 709 | 40.714 | -9.676  | -29.250 | 1.00 | 0.00 | C | O |
| ATOM | 14059 | N   | GLU | B | 710 | 39.325 | -9.456  | -31.011 | 1.00 | 0.00 | C | N |
| ATOM | 14060 | CA  | GLU | B | 710 | 40.348 | -9.847  | -31.935 | 1.00 | 0.00 | C | C |
| ATOM | 14061 | CB  | GLU | B | 710 | 39.911 | -9.799  | -33.410 | 1.00 | 0.00 | C | C |
| ATOM | 14062 | CG  | GLU | B | 710 | 41.032 | -10.226 | -34.367 | 1.00 | 0.00 | C | C |
| ATOM | 14063 | CD  | GLU | B | 710 | 40.624 | -9.894  | -35.797 | 1.00 | 0.00 | C | C |
| ATOM | 14064 | OE1 | GLU | B | 710 | 39.549 | -9.266  | -35.978 | 1.00 | 0.00 | C | O |
| ATOM | 14065 | OE2 | GLU | B | 710 | 41.391 | -10.260 | -36.730 | 1.00 | 0.00 | C | O |
| ATOM | 14066 | C   | GLU | B | 710 | 41.502 | -8.908  | -31.809 | 1.00 | 0.00 | C | C |
| ATOM | 14067 | O   | GLU | B | 710 | 42.652 | -9.346  | -31.780 | 1.00 | 0.00 | C | O |
| ATOM | 14068 | N   | LYS | B | 711 | 41.238 | -7.589  | -31.736 | 1.00 | 0.00 | C | N |
| ATOM | 14069 | CA  | LYS | B | 711 | 42.323 | -6.651  | -31.645 | 1.00 | 0.00 | C | C |
| ATOM | 14070 | CB  | LYS | B | 711 | 41.881 | -5.182  | -31.740 | 1.00 | 0.00 | C | C |
| ATOM | 14071 | CG  | LYS | B | 711 | 41.506 | -4.744  | -33.158 | 1.00 | 0.00 | C | C |
| ATOM | 14072 | CD  | LYS | B | 711 | 42.658 | -4.858  | -34.163 | 1.00 | 0.00 | C | C |
| ATOM | 14073 | CE  | LYS | B | 711 | 42.479 | -5.981  | -35.188 | 1.00 | 0.00 | C | C |
| ATOM | 14074 | NZ  | LYS | B | 711 | 42.402 | -7.292  | -34.507 | 1.00 | 0.00 | C | N |
| ATOM | 14075 | C   | LYS | B | 711 | 43.068 | -6.819  | -30.345 | 1.00 | 0.00 | C | C |
| ATOM | 14076 | O   | LYS | B | 711 | 44.296 | -6.778  | -30.328 | 1.00 | 0.00 | C | O |
| ATOM | 14077 | N   | SER | B | 712 | 42.338 | -6.994  | -29.224 | 1.00 | 0.00 | C | N |
| ATOM | 14078 | CA  | SER | B | 712 | 42.893 | -7.101  | -27.894 | 1.00 | 0.00 | C | C |

|      |       |     |     |   |     |        |         |         |      |      |   |   |
|------|-------|-----|-----|---|-----|--------|---------|---------|------|------|---|---|
| ATOM | 14079 | CB  | SER | B | 712 | 41.843 | -6.829  | -26.800 | 1.00 | 0.00 | C | C |
| ATOM | 14080 | OG  | SER | B | 712 | 42.440 | -6.930  | -25.515 | 1.00 | 0.00 | C | O |
| ATOM | 14081 | C   | SER | B | 712 | 43.467 | -8.465  | -27.643 | 1.00 | 0.00 | C | C |
| ATOM | 14082 | O   | SER | B | 712 | 44.093 | -8.706  | -26.613 | 1.00 | 0.00 | C | O |
| ATOM | 14083 | N   | PHE | B | 713 | 43.277 | -9.392  | -28.590 | 1.00 | 0.00 | C | N |
| ATOM | 14084 | CA  | PHE | B | 713 | 43.679 | -10.768 | -28.484 | 1.00 | 0.00 | C | C |
| ATOM | 14085 | CB  | PHE | B | 713 | 43.118 | -11.660 | -29.602 | 1.00 | 0.00 | C | C |
| ATOM | 14086 | CG  | PHE | B | 713 | 43.346 | -13.066 | -29.165 | 1.00 | 0.00 | C | C |
| ATOM | 14087 | CD1 | PHE | B | 713 | 42.555 | -13.609 | -28.177 | 1.00 | 0.00 | C | C |
| ATOM | 14088 | CE1 | PHE | B | 713 | 42.740 | -14.904 | -27.756 | 1.00 | 0.00 | C | C |
| ATOM | 14089 | CZ  | PHE | B | 713 | 43.726 | -15.671 | -28.326 | 1.00 | 0.00 | C | C |
| ATOM | 14090 | CD2 | PHE | B | 713 | 44.328 | -13.843 | -29.735 | 1.00 | 0.00 | C | C |
| ATOM | 14091 | CE2 | PHE | B | 713 | 44.518 | -15.139 | -29.317 | 1.00 | 0.00 | C | C |
| ATOM | 14092 | C   | PHE | B | 713 | 45.176 | -10.868 | -28.507 | 1.00 | 0.00 | C | C |
| ATOM | 14093 | O   | PHE | B | 713 | 45.726 | -11.937 | -28.246 | 1.00 | 0.00 | C | O |
| ATOM | 14094 | N   | LEU | B | 714 | 45.868 | -9.761  | -28.835 | 1.00 | 0.00 | C | N |
| ATOM | 14095 | CA  | LEU | B | 714 | 47.286 | -9.741  | -29.077 | 1.00 | 0.00 | C | C |
| ATOM | 14096 | CB  | LEU | B | 714 | 48.143 | -10.650 | -28.173 | 1.00 | 0.00 | C | C |
| ATOM | 14097 | CG  | LEU | B | 714 | 48.382 | -10.122 | -26.746 | 1.00 | 0.00 | C | C |
| ATOM | 14098 | CD1 | LEU | B | 714 | 49.201 | -8.822  | -26.776 | 1.00 | 0.00 | C | C |
| ATOM | 14099 | CD2 | LEU | B | 714 | 47.078 | -9.998  | -25.945 | 1.00 | 0.00 | C | C |
| ATOM | 14100 | C   | LEU | B | 714 | 47.509 | -10.176 | -30.476 | 1.00 | 0.00 | C | C |
| ATOM | 14101 | O   | LEU | B | 714 | 48.641 | -10.445 | -30.876 | 1.00 | 0.00 | C | O |
| ATOM | 14102 | N   | LYS | B | 715 | 46.414 | -10.219 | -31.259 | 1.00 | 0.00 | C | N |
| ATOM | 14103 | CA  | LYS | B | 715 | 46.539 | -10.483 | -32.659 | 1.00 | 0.00 | C | C |
| ATOM | 14104 | CB  | LYS | B | 715 | 47.410 | -9.403  | -33.312 | 1.00 | 0.00 | C | C |
| ATOM | 14105 | CG  | LYS | B | 715 | 46.910 | -8.004  | -32.947 | 1.00 | 0.00 | C | C |
| ATOM | 14106 | CD  | LYS | B | 715 | 47.988 | -6.921  | -33.032 | 1.00 | 0.00 | C | C |
| ATOM | 14107 | CE  | LYS | B | 715 | 47.621 | -5.649  | -32.266 | 1.00 | 0.00 | C | C |
| ATOM | 14108 | NZ  | LYS | B | 715 | 48.826 | -4.820  | -32.048 | 1.00 | 0.00 | C | N |
| ATOM | 14109 | C   | LYS | B | 715 | 47.219 | -11.797 | -32.780 | 1.00 | 0.00 | C | C |
| ATOM | 14110 | O   | LYS | B | 715 | 48.046 | -12.010 | -33.666 | 1.00 | 0.00 | C | O |
| ATOM | 14111 | N   | CYS | B | 716 | 46.865 | -12.725 | -31.875 | 1.00 | 0.00 | C | N |
| ATOM | 14112 | CA  | CYS | B | 716 | 47.495 | -14.005 | -31.893 | 1.00 | 0.00 | C | C |
| ATOM | 14113 | CB  | CYS | B | 716 | 47.098 | -14.918 | -30.722 | 1.00 | 0.00 | C | C |
| ATOM | 14114 | SG  | CYS | B | 716 | 47.663 | -14.285 | -29.115 | 1.00 | 0.00 | C | S |
| ATOM | 14115 | C   | CYS | B | 716 | 47.081 | -14.669 | -33.161 | 1.00 | 0.00 | C | C |
| ATOM | 14116 | O   | CYS | B | 716 | 46.226 | -14.157 | -33.882 | 1.00 | 0.00 | C | O |



|      |       |     |           |         |         |         |      |      |   |   |
|------|-------|-----|-----------|---------|---------|---------|------|------|---|---|
| ATOM | 14117 | N   | MET B 717 | 47.712  | -15.816 | -33.474 | 1.00 | 0.00 | C | N |
| ATOM | 14118 | CA  | MET B 717 | 47.422  | -16.493 | -34.704 | 1.00 | 0.00 | C | C |
| ATOM | 14119 | CB  | MET B 717 | 48.074  | -17.878 | -34.834 | 1.00 | 0.00 | C | C |
| ATOM | 14120 | CG  | MET B 717 | 47.569  | -18.641 | -36.062 | 1.00 | 0.00 | C | C |
| ATOM | 14121 | SD  | MET B 717 | 48.062  | -20.387 | -36.144 | 1.00 | 0.00 | C | S |
| ATOM | 14122 | CE  | MET B 717 | 46.978  | -20.780 | -37.548 | 1.00 | 0.00 | C | C |
| ATOM | 14123 | C   | MET B 717 | 45.956  | -16.740 | -34.765 | 1.00 | 0.00 | C | C |
| ATOM | 14124 | O   | MET B 717 | 45.351  | -17.218 | -33.807 | 1.00 | 0.00 | C | O |
| ATOM | 14125 | N   | ARG B 718 | 45.356  | -16.395 | -35.917 | 1.00 | 0.00 | C | N |
| ATOM | 14126 | CA  | ARG B 718 | 43.959  | -16.600 | -36.144 | 1.00 | 0.00 | C | C |
| ATOM | 14127 | CB  | ARG B 718 | 43.087  | -15.561 | -35.419 | 1.00 | 0.00 | C | C |
| ATOM | 14128 | CG  | ARG B 718 | 41.583  | -15.721 | -35.627 | 1.00 | 0.00 | C | C |
| ATOM | 14129 | CD  | ARG B 718 | 40.780  | -14.671 | -34.857 | 1.00 | 0.00 | C | C |
| ATOM | 14130 | NE  | ARG B 718 | 40.915  | -14.996 | -33.408 | 1.00 | 0.00 | C | N |
| ATOM | 14131 | CZ  | ARG B 718 | 40.748  | -14.015 | -32.473 | 1.00 | 0.00 | C | C |
| ATOM | 14132 | NH1 | ARG B 718 | 40.483  | -12.735 | -32.869 | 1.00 | 0.00 | C | N |
| ATOM | 14133 | NH2 | ARG B 718 | 40.827  | -14.316 | -31.144 | 1.00 | 0.00 | C | N |
| ATOM | 14134 | C   | ARG B 718 | 43.757  | -16.425 | -37.611 | 1.00 | 0.00 | C | C |
| ATOM | 14135 | O   | ARG B 718 | 44.571  | -15.783 | -38.273 | 1.00 | 0.00 | C | O |
| ATOM | 14136 | C   | LYS B 719 | 41.634  | -15.516 | -39.700 | 1.00 | 0.00 | C | C |
| ATOM | 14137 | OT1 | LYS B 719 | 41.369  | -15.216 | -38.783 | 0.00 | 0.00 | C | O |
| ATOM | 14138 | OT2 | LYS B 719 | 41.511  | -15.295 | -40.668 | 0.00 | 0.00 | C | O |
| ATOM | 14139 | N   | LYS B 719 | 42.686  | -17.009 | -38.185 | 1.00 | 0.00 | C | N |
| ATOM | 14140 | CA  | LYS B 719 | 42.538  | -16.730 | -39.581 | 1.00 | 0.00 | C | C |
| ATOM | 14141 | CB  | LYS B 719 | 41.915  | -17.828 | -40.451 | 1.00 | 0.00 | C | C |
| ATOM | 14142 | CG  | LYS B 719 | 41.847  | -17.335 | -41.899 | 1.00 | 0.00 | C | C |
| ATOM | 14143 | CD  | LYS B 719 | 43.234  | -17.052 | -42.488 | 1.00 | 0.00 | C | C |
| ATOM | 14144 | CE  | LYS B 719 | 43.284  | -15.841 | -43.430 | 1.00 | 0.00 | C | C |
| ATOM | 14145 | NZ  | LYS B 719 | 42.375  | -16.039 | -44.579 | 1.00 | 0.00 | C | N |
| ATOM | 14146 | N   | LEU A 112 | -36.712 | -56.883 | -71.221 | 1.00 | 0.00 | D | N |
| ATOM | 14147 | CA  | LEU A 112 | -35.367 | -56.853 | -71.806 | 1.00 | 0.00 | D | C |
| ATOM | 14148 | CB  | LEU A 112 | -35.457 | -56.492 | -73.297 | 1.00 | 0.00 | D | C |
| ATOM | 14149 | CG  | LEU A 112 | -36.275 | -57.504 | -74.129 | 1.00 | 0.00 | D | C |
| ATOM | 14150 | CD1 | LEU A 112 | -36.297 | -57.126 | -75.620 | 1.00 | 0.00 | D | C |
| ATOM | 14151 | CD2 | LEU A 112 | -35.798 | -58.943 | -73.887 | 1.00 | 0.00 | D | C |
| ATOM | 14152 | C   | LEU A 112 | -34.561 | -55.800 | -71.124 | 1.00 | 0.00 | D | C |
| ATOM | 14153 | O   | LEU A 112 | -33.360 | -55.677 | -71.356 | 1.00 | 0.00 | D | O |
| ATOM | 14154 | N   | TYR A 113 | -35.215 | -55.000 | -70.257 | 1.00 | 0.00 | D | N |

|      |       |     |     |   |     |         |         |         |      |      |   |   |
|------|-------|-----|-----|---|-----|---------|---------|---------|------|------|---|---|
| ATOM | 14155 | CA  | TYR | A | 113 | -34.493 | -53.943 | -69.619 | 1.00 | 0.00 | D | C |
| ATOM | 14156 | CB  | TYR | A | 113 | -34.918 | -52.547 | -70.108 | 1.00 | 0.00 | D | C |
| ATOM | 14157 | CG  | TYR | A | 113 | -34.486 | -52.378 | -71.521 | 1.00 | 0.00 | D | C |
| ATOM | 14158 | CD1 | TYR | A | 113 | -35.187 | -52.971 | -72.544 | 1.00 | 0.00 | D | C |
| ATOM | 14159 | CE1 | TYR | A | 113 | -34.787 | -52.807 | -73.848 | 1.00 | 0.00 | D | C |
| ATOM | 14160 | CZ  | TYR | A | 113 | -33.681 | -52.041 | -74.136 | 1.00 | 0.00 | D | C |
| ATOM | 14161 | OH  | TYR | A | 113 | -33.265 | -51.870 | -75.473 | 1.00 | 0.00 | D | O |
| ATOM | 14162 | CD2 | TYR | A | 113 | -33.383 | -51.611 | -71.821 | 1.00 | 0.00 | D | C |
| ATOM | 14163 | CE2 | TYR | A | 113 | -32.977 | -51.441 | -73.122 | 1.00 | 0.00 | D | C |
| ATOM | 14164 | C   | TYR | A | 113 | -34.759 | -53.941 | -68.152 | 1.00 | 0.00 | D | C |
| ATOM | 14165 | O   | TYR | A | 113 | -35.908 | -53.993 | -67.713 | 1.00 | 0.00 | D | O |
| ATOM | 14166 | N   | ASP | A | 114 | -33.674 | -53.905 | -67.356 | 1.00 | 0.00 | D | N |
| ATOM | 14167 | CA  | ASP | A | 114 | -33.770 | -53.704 | -65.942 | 1.00 | 0.00 | D | C |
| ATOM | 14168 | CB  | ASP | A | 114 | -32.937 | -54.703 | -65.122 | 1.00 | 0.00 | D | C |
| ATOM | 14169 | CG  | ASP | A | 114 | -31.492 | -54.620 | -65.579 | 1.00 | 0.00 | D | C |
| ATOM | 14170 | OD1 | ASP | A | 114 | -31.241 | -54.889 | -66.788 | 1.00 | 0.00 | D | O |
| ATOM | 14171 | OD2 | ASP | A | 114 | -30.618 | -54.304 | -64.732 | 1.00 | 0.00 | D | O |
| ATOM | 14172 | C   | ASP | A | 114 | -33.306 | -52.297 | -65.690 | 1.00 | 0.00 | D | C |
| ATOM | 14173 | O   | ASP | A | 114 | -32.874 | -51.606 | -66.611 | 1.00 | 0.00 | D | O |
| ATOM | 14174 | N   | ARG | A | 115 | -33.383 | -51.824 | -64.432 | 1.00 | 0.00 | D | N |
| ATOM | 14175 | CA  | ARG | A | 115 | -33.000 | -50.470 | -64.132 | 1.00 | 0.00 | D | C |
| ATOM | 14176 | CB  | ARG | A | 115 | -33.224 | -50.116 | -62.651 | 1.00 | 0.00 | D | C |
| ATOM | 14177 | CG  | ARG | A | 115 | -32.836 | -48.685 | -62.272 | 1.00 | 0.00 | D | C |
| ATOM | 14178 | CD  | ARG | A | 115 | -33.169 | -48.341 | -60.818 | 1.00 | 0.00 | D | C |
| ATOM | 14179 | NE  | ARG | A | 115 | -32.146 | -48.989 | -59.946 | 1.00 | 0.00 | D | N |
| ATOM | 14180 | CZ  | ARG | A | 115 | -31.022 | -48.302 | -59.589 | 1.00 | 0.00 | D | C |
| ATOM | 14181 | NH1 | ARG | A | 115 | -30.848 | -47.018 | -60.010 | 1.00 | 0.00 | D | N |
| ATOM | 14182 | NH2 | ARG | A | 115 | -30.077 | -48.898 | -58.803 | 1.00 | 0.00 | D | N |
| ATOM | 14183 | C   | ARG | A | 115 | -31.541 | -50.300 | -64.431 | 1.00 | 0.00 | D | C |
| ATOM | 14184 | O   | ARG | A | 115 | -31.125 | -49.291 | -64.999 | 1.00 | 0.00 | D | O |
| ATOM | 14185 | N   | ARG | A | 116 | -30.739 | -51.314 | -64.078 | 1.00 | 0.00 | D | N |
| ATOM | 14186 | CA  | ARG | A | 116 | -29.310 | -51.256 | -64.187 | 1.00 | 0.00 | D | C |
| ATOM | 14187 | CB  | ARG | A | 116 | -28.665 | -52.561 | -63.690 | 1.00 | 0.00 | D | C |
| ATOM | 14188 | CG  | ARG | A | 116 | -27.272 | -52.370 | -63.091 | 1.00 | 0.00 | D | C |
| ATOM | 14189 | CD  | ARG | A | 116 | -26.256 | -51.689 | -64.001 | 1.00 | 0.00 | D | C |
| ATOM | 14190 | NE  | ARG | A | 116 | -25.112 | -51.326 | -63.119 | 1.00 | 0.00 | D | N |
| ATOM | 14191 | CZ  | ARG | A | 116 | -25.151 | -50.151 | -62.420 | 1.00 | 0.00 | D | C |
| ATOM | 14192 | NH1 | ARG | A | 116 | -26.181 | -49.279 | -62.610 | 1.00 | 0.00 | D | N |

ATOM 14193 NH2 ARG A 116 -24.163 -49.856 -61.524 1.00 0.00 D N  
ATOM 14194 C ARG A 116 -28.921 -51.083 -65.624 1.00 0.00 D C  
ATOM 14195 O ARG A 116 -28.040 -50.286 -65.944 1.00 0.00 D O  
ATOM 14196 N SER A 117 -29.589 -51.813 -66.538 1.00 0.00 D N  
ATOM 14197 CA SER A 117 -29.205 -51.809 -67.921 1.00 0.00 D C  
ATOM 14198 CB SER A 117 -30.065 -52.752 -68.781 1.00 0.00 D C  
ATOM 14199 OG SER A 117 -31.428 -52.352 -68.746 1.00 0.00 D O  
ATOM 14200 C SER A 117 -29.288 -50.429 -68.507 1.00 0.00 D C  
ATOM 14201 O SER A 117 -28.356 -49.990 -69.178 1.00 0.00 D O  
ATOM 14202 N ILE A 118 -30.401 -49.707 -68.279 1.00 0.00 D N  
ATOM 14203 CA ILE A 118 -30.591 -48.400 -68.855 1.00 0.00 D C  
ATOM 14204 CB ILE A 118 -31.964 -47.841 -68.630 1.00 0.00 D C  
ATOM 14205 CG2 ILE A 118 -31.985 -46.420 -69.216 1.00 0.00 D C  
ATOM 14206 CG1 ILE A 118 -33.032 -48.765 -69.238 1.00 0.00 D C  
ATOM 14207 CD ILE A 118 -34.453 -48.410 -68.802 1.00 0.00 D C  
ATOM 14208 C ILE A 118 -29.622 -47.410 -68.281 1.00 0.00 D C  
ATOM 14209 O ILE A 118 -29.063 -46.585 -69.004 1.00 0.00 D O  
ATOM 14210 N PHE A 119 -29.392 -47.469 -66.957 1.00 0.00 D N  
ATOM 14211 CA PHE A 119 -28.550 -46.518 -66.289 1.00 0.00 D C  
ATOM 14212 CB PHE A 119 -28.409 -46.800 -64.779 1.00 0.00 D C  
ATOM 14213 CG PHE A 119 -29.561 -46.183 -64.056 1.00 0.00 D C  
ATOM 14214 CD1 PHE A 119 -30.837 -46.675 -64.188 1.00 0.00 D C  
ATOM 14215 CE1 PHE A 119 -31.888 -46.089 -63.522 1.00 0.00 D C  
ATOM 14216 CZ PHE A 119 -31.677 -44.995 -62.720 1.00 0.00 D C  
ATOM 14217 CD2 PHE A 119 -29.362 -45.072 -63.266 1.00 0.00 D C  
ATOM 14218 CE2 PHE A 119 -30.407 -44.482 -62.595 1.00 0.00 D C  
ATOM 14219 C PHE A 119 -27.187 -46.553 -66.897 1.00 0.00 D C  
ATOM 14220 O PHE A 119 -26.567 -45.506 -67.084 1.00 0.00 D O  
ATOM 14221 N GLU A 120 -26.672 -47.758 -67.192 1.00 0.00 D N  
ATOM 14222 CA GLU A 120 -25.371 -47.890 -67.780 1.00 0.00 D C  
ATOM 14223 CB GLU A 120 -24.899 -49.352 -67.852 1.00 0.00 D C  
ATOM 14224 CG GLU A 120 -24.678 -49.983 -66.474 1.00 0.00 D C  
ATOM 14225 CD GLU A 120 -23.465 -49.324 -65.824 1.00 0.00 D C  
ATOM 14226 OE1 GLU A 120 -23.323 -48.081 -65.961 1.00 0.00 D O  
ATOM 14227 OE2 GLU A 120 -22.668 -50.059 -65.182 1.00 0.00 D O  
ATOM 14228 C GLU A 120 -25.383 -47.328 -69.171 1.00 0.00 D C  
ATOM 14229 O GLU A 120 -24.419 -46.691 -69.596 1.00 0.00 D O  
ATOM 14230 N ALA A 121 -26.474 -47.548 -69.924 1.00 0.00 D N

|      |       |     |     |   |     |         |         |         |      |      |   |   |
|------|-------|-----|-----|---|-----|---------|---------|---------|------|------|---|---|
| ATOM | 14231 | CA  | ALA | A | 121 | -26.538 | -47.068 | -71.278 | 1.00 | 0.00 | D | C |
| ATOM | 14232 | CB  | ALA | A | 121 | -27.851 | -47.447 | -71.984 | 1.00 | 0.00 | D | C |
| ATOM | 14233 | C   | ALA | A | 121 | -26.450 | -45.572 | -71.264 | 1.00 | 0.00 | D | C |
| ATOM | 14234 | O   | ALA | A | 121 | -25.746 | -44.975 | -72.078 | 1.00 | 0.00 | D | O |
| ATOM | 14235 | N   | VAL | A | 122 | -27.158 | -44.932 | -70.316 | 1.00 | 0.00 | D | N |
| ATOM | 14236 | CA  | VAL | A | 122 | -27.225 | -43.500 | -70.200 | 1.00 | 0.00 | D | C |
| ATOM | 14237 | CB  | VAL | A | 122 | -28.164 | -43.058 | -69.113 | 1.00 | 0.00 | D | C |
| ATOM | 14238 | CG1 | VAL | A | 122 | -28.057 | -41.534 | -68.945 | 1.00 | 0.00 | D | C |
| ATOM | 14239 | CG2 | VAL | A | 122 | -29.580 | -43.537 | -69.474 | 1.00 | 0.00 | D | C |
| ATOM | 14240 | C   | VAL | A | 122 | -25.871 | -42.932 | -69.893 | 1.00 | 0.00 | D | C |
| ATOM | 14241 | O   | VAL | A | 122 | -25.507 | -41.868 | -70.396 | 1.00 | 0.00 | D | O |
| ATOM | 14242 | N   | ALA | A | 123 | -25.073 | -43.631 | -69.064 | 1.00 | 0.00 | D | N |
| ATOM | 14243 | CA  | ALA | A | 123 | -23.804 | -43.102 | -68.645 | 1.00 | 0.00 | D | C |
| ATOM | 14244 | CB  | ALA | A | 123 | -23.038 | -44.064 | -67.721 | 1.00 | 0.00 | D | C |
| ATOM | 14245 | C   | ALA | A | 123 | -22.944 | -42.850 | -69.851 | 1.00 | 0.00 | D | C |
| ATOM | 14246 | O   | ALA | A | 123 | -22.196 | -41.877 | -69.907 | 1.00 | 0.00 | D | O |
| ATOM | 14247 | N   | GLN | A | 124 | -23.010 | -43.777 | -70.819 | 1.00 | 0.00 | D | N |
| ATOM | 14248 | CA  | GLN | A | 124 | -22.304 | -43.826 | -72.072 | 1.00 | 0.00 | D | C |
| ATOM | 14249 | CB  | GLN | A | 124 | -22.359 | -45.226 | -72.706 | 1.00 | 0.00 | D | C |
| ATOM | 14250 | CG  | GLN | A | 124 | -21.742 | -46.317 | -71.831 | 1.00 | 0.00 | D | C |
| ATOM | 14251 | CD  | GLN | A | 124 | -21.897 | -47.637 | -72.574 | 1.00 | 0.00 | D | C |
| ATOM | 14252 | OE1 | GLN | A | 124 | -20.928 | -48.203 | -73.075 | 1.00 | 0.00 | D | O |
| ATOM | 14253 | NE2 | GLN | A | 124 | -23.157 | -48.145 | -72.652 | 1.00 | 0.00 | D | N |
| ATOM | 14254 | C   | GLN | A | 124 | -22.848 | -42.871 | -73.097 | 1.00 | 0.00 | D | C |
| ATOM | 14255 | O   | GLN | A | 124 | -22.152 | -42.553 | -74.061 | 1.00 | 0.00 | D | O |
| ATOM | 14256 | N   | ASN | A | 125 | -24.114 | -42.429 | -72.962 | 1.00 | 0.00 | D | N |
| ATOM | 14257 | CA  | ASN | A | 125 | -24.725 | -41.632 | -73.993 | 1.00 | 0.00 | D | C |
| ATOM | 14258 | CB  | ASN | A | 125 | -23.873 | -40.420 | -74.406 | 1.00 | 0.00 | D | C |
| ATOM | 14259 | CG  | ASN | A | 125 | -24.714 | -39.530 | -75.309 | 1.00 | 0.00 | D | C |
| ATOM | 14260 | OD1 | ASN | A | 125 | -25.776 | -39.059 | -74.906 | 1.00 | 0.00 | D | O |
| ATOM | 14261 | ND2 | ASN | A | 125 | -24.233 | -39.293 | -76.558 | 1.00 | 0.00 | D | N |
| ATOM | 14262 | C   | ASN | A | 125 | -24.921 | -42.502 | -75.200 | 1.00 | 0.00 | D | C |
| ATOM | 14263 | O   | ASN | A | 125 | -24.696 | -42.075 | -76.333 | 1.00 | 0.00 | D | O |
| ATOM | 14264 | N   | ASN | A | 126 | -25.363 | -43.759 | -74.982 | 1.00 | 0.00 | D | N |
| ATOM | 14265 | CA  | ASN | A | 126 | -25.535 | -44.676 | -76.071 | 1.00 | 0.00 | D | C |
| ATOM | 14266 | CB  | ASN | A | 126 | -25.008 | -46.084 | -75.739 | 1.00 | 0.00 | D | C |
| ATOM | 14267 | CG  | ASN | A | 126 | -24.697 | -46.804 | -77.039 | 1.00 | 0.00 | D | C |
| ATOM | 14268 | OD1 | ASN | A | 126 | -24.780 | -46.221 | -78.117 | 1.00 | 0.00 | D | O |

|      |       |     |     |   |     |         |         |         |      |      |   |   |
|------|-------|-----|-----|---|-----|---------|---------|---------|------|------|---|---|
| ATOM | 14269 | ND2 | ASN | A | 126 | -24.319 | -48.107 | -76.939 | 1.00 | 0.00 | D | N |
| ATOM | 14270 | C   | ASN | A | 126 | -27.001 | -44.789 | -76.399 | 1.00 | 0.00 | D | C |
| ATOM | 14271 | O   | ASN | A | 126 | -27.803 | -45.260 | -75.595 | 1.00 | 0.00 | D | O |
| ATOM | 14272 | N   | CYS | A | 127 | -27.384 | -44.298 | -77.595 | 1.00 | 0.00 | D | N |
| ATOM | 14273 | CA  | CYS | A | 127 | -28.724 | -44.332 | -78.117 | 1.00 | 0.00 | D | C |
| ATOM | 14274 | CB  | CYS | A | 127 | -28.930 | -43.379 | -79.304 | 1.00 | 0.00 | D | C |
| ATOM | 14275 | SG  | CYS | A | 127 | -28.907 | -41.639 | -78.793 | 1.00 | 0.00 | D | S |
| ATOM | 14276 | C   | CYS | A | 127 | -29.120 | -45.704 | -78.585 | 1.00 | 0.00 | D | C |
| ATOM | 14277 | O   | CYS | A | 127 | -30.305 | -46.030 | -78.601 | 1.00 | 0.00 | D | O |
| ATOM | 14278 | N   | GLN | A | 128 | -28.157 | -46.519 | -79.057 | 1.00 | 0.00 | D | N |
| ATOM | 14279 | CA  | GLN | A | 128 | -28.485 | -47.792 | -79.651 | 1.00 | 0.00 | D | C |
| ATOM | 14280 | CB  | GLN | A | 128 | -27.327 | -48.411 | -80.458 | 1.00 | 0.00 | D | C |
| ATOM | 14281 | CG  | GLN | A | 128 | -27.037 | -47.632 | -81.744 | 1.00 | 0.00 | D | C |
| ATOM | 14282 | CD  | GLN | A | 128 | -26.046 | -48.412 | -82.601 | 1.00 | 0.00 | D | C |
| ATOM | 14283 | OE1 | GLN | A | 128 | -25.194 | -47.828 | -83.268 | 1.00 | 0.00 | D | O |
| ATOM | 14284 | NE2 | GLN | A | 128 | -26.167 | -49.767 | -82.597 | 1.00 | 0.00 | D | N |
| ATOM | 14285 | C   | GLN | A | 128 | -29.006 | -48.819 | -78.682 | 1.00 | 0.00 | D | C |
| ATOM | 14286 | O   | GLN | A | 128 | -29.968 | -49.523 | -78.988 | 1.00 | 0.00 | D | O |
| ATOM | 14287 | N   | ASP | A | 129 | -28.428 | -48.919 | -77.473 | 1.00 | 0.00 | D | N |
| ATOM | 14288 | CA  | ASP | A | 129 | -28.821 | -49.949 | -76.545 | 1.00 | 0.00 | D | C |
| ATOM | 14289 | CB  | ASP | A | 129 | -28.033 | -49.887 | -75.225 | 1.00 | 0.00 | D | C |
| ATOM | 14290 | CG  | ASP | A | 129 | -26.594 | -50.287 | -75.518 | 1.00 | 0.00 | D | C |
| ATOM | 14291 | OD1 | ASP | A | 129 | -26.350 | -50.849 | -76.620 | 1.00 | 0.00 | D | O |
| ATOM | 14292 | OD2 | ASP | A | 129 | -25.719 | -50.037 | -74.647 | 1.00 | 0.00 | D | O |
| ATOM | 14293 | C   | ASP | A | 129 | -30.275 | -49.764 | -76.229 | 1.00 | 0.00 | D | C |
| ATOM | 14294 | O   | ASP | A | 129 | -30.962 | -50.693 | -75.806 | 1.00 | 0.00 | D | O |
| ATOM | 14295 | N   | LEU | A | 130 | -30.728 | -48.508 | -76.347 | 1.00 | 0.00 | D | N |
| ATOM | 14296 | CA  | LEU | A | 130 | -32.052 | -47.991 | -76.154 | 1.00 | 0.00 | D | C |
| ATOM | 14297 | CB  | LEU | A | 130 | -32.060 | -46.469 | -75.925 | 1.00 | 0.00 | D | C |
| ATOM | 14298 | CG  | LEU | A | 130 | -31.383 | -46.066 | -74.597 | 1.00 | 0.00 | D | C |
| ATOM | 14299 | CD1 | LEU | A | 130 | -31.399 | -44.545 | -74.387 | 1.00 | 0.00 | D | C |
| ATOM | 14300 | CD2 | LEU | A | 130 | -32.000 | -46.823 | -73.410 | 1.00 | 0.00 | D | C |
| ATOM | 14301 | C   | LEU | A | 130 | -32.976 | -48.310 | -77.288 | 1.00 | 0.00 | D | C |
| ATOM | 14302 | O   | LEU | A | 130 | -34.164 | -48.007 | -77.202 | 1.00 | 0.00 | D | O |
| ATOM | 14303 | N   | GLU | A | 131 | -32.460 | -48.812 | -78.425 | 1.00 | 0.00 | D | N |
| ATOM | 14304 | CA  | GLU | A | 131 | -33.291 | -49.032 | -79.579 | 1.00 | 0.00 | D | C |
| ATOM | 14305 | CB  | GLU | A | 131 | -32.488 | -49.620 | -80.748 | 1.00 | 0.00 | D | C |
| ATOM | 14306 | CG  | GLU | A | 131 | -31.391 | -48.664 | -81.229 | 1.00 | 0.00 | D | C |

|      |       |     |           |         |         |         |      |      |   |   |
|------|-------|-----|-----------|---------|---------|---------|------|------|---|---|
| ATOM | 14307 | CD  | GLU A 131 | -30.558 | -49.374 | -82.285 | 1.00 | 0.00 | D | C |
| ATOM | 14308 | OE1 | GLU A 131 | -29.574 | -50.061 | -81.903 | 1.00 | 0.00 | D | O |
| ATOM | 14309 | OE2 | GLU A 131 | -30.896 | -49.241 | -83.491 | 1.00 | 0.00 | D | O |
| ATOM | 14310 | C   | GLU A 131 | -34.434 | -49.960 | -79.256 | 1.00 | 0.00 | D | C |
| ATOM | 14311 | O   | GLU A 131 | -35.571 | -49.702 | -79.648 | 1.00 | 0.00 | D | O |
| ATOM | 14312 | N   | SER A 132 | -34.178 | -51.069 | -78.536 | 1.00 | 0.00 | D | N |
| ATOM | 14313 | CA  | SER A 132 | -35.200 | -52.031 | -78.208 | 1.00 | 0.00 | D | C |
| ATOM | 14314 | CB  | SER A 132 | -34.618 | -53.402 | -77.820 | 1.00 | 0.00 | D | C |
| ATOM | 14315 | OG  | SER A 132 | -33.958 | -53.987 | -78.934 | 1.00 | 0.00 | D | O |
| ATOM | 14316 | C   | SER A 132 | -36.049 | -51.569 | -77.054 | 1.00 | 0.00 | D | C |
| ATOM | 14317 | O   | SER A 132 | -36.936 | -52.299 | -76.614 | 1.00 | 0.00 | D | O |
| ATOM | 14318 | N   | LEU A 133 | -35.779 | -50.369 | -76.502 | 1.00 | 0.00 | D | N |
| ATOM | 14319 | CA  | LEU A 133 | -36.422 | -49.932 | -75.292 | 1.00 | 0.00 | D | C |
| ATOM | 14320 | CB  | LEU A 133 | -35.790 | -48.642 | -74.725 | 1.00 | 0.00 | D | C |
| ATOM | 14321 | CG  | LEU A 133 | -36.416 | -48.169 | -73.394 | 1.00 | 0.00 | D | C |
| ATOM | 14322 | CD1 | LEU A 133 | -36.290 | -49.248 | -72.307 | 1.00 | 0.00 | D | C |
| ATOM | 14323 | CD2 | LEU A 133 | -35.826 | -46.820 | -72.935 | 1.00 | 0.00 | D | C |
| ATOM | 14324 | C   | LEU A 133 | -37.912 | -49.713 | -75.400 | 1.00 | 0.00 | D | C |
| ATOM | 14325 | O   | LEU A 133 | -38.672 | -50.302 | -74.632 | 1.00 | 0.00 | D | O |
| ATOM | 14326 | N   | LEU A 134 | -38.389 | -48.924 | -76.384 | 1.00 | 0.00 | D | N |
| ATOM | 14327 | CA  | LEU A 134 | -39.775 | -48.548 | -76.431 | 1.00 | 0.00 | D | C |
| ATOM | 14328 | CB  | LEU A 134 | -40.074 | -47.650 | -77.645 | 1.00 | 0.00 | D | C |
| ATOM | 14329 | CG  | LEU A 134 | -41.416 | -46.883 | -77.631 | 1.00 | 0.00 | D | C |
| ATOM | 14330 | CD1 | LEU A 134 | -41.671 | -46.268 | -79.010 | 1.00 | 0.00 | D | C |
| ATOM | 14331 | CD2 | LEU A 134 | -42.611 | -47.694 | -77.117 | 1.00 | 0.00 | D | C |
| ATOM | 14332 | C   | LEU A 134 | -40.619 | -49.783 | -76.564 | 1.00 | 0.00 | D | C |
| ATOM | 14333 | O   | LEU A 134 | -41.632 | -49.937 | -75.888 | 1.00 | 0.00 | D | O |
| ATOM | 14334 | N   | LEU A 135 | -40.209 | -50.727 | -77.426 | 1.00 | 0.00 | D | N |
| ATOM | 14335 | CA  | LEU A 135 | -41.018 | -51.882 | -77.673 | 1.00 | 0.00 | D | C |
| ATOM | 14336 | CB  | LEU A 135 | -40.480 | -52.769 | -78.818 | 1.00 | 0.00 | D | C |
| ATOM | 14337 | CG  | LEU A 135 | -39.036 | -53.277 | -78.650 | 1.00 | 0.00 | D | C |
| ATOM | 14338 | CD1 | LEU A 135 | -38.920 | -54.318 | -77.526 | 1.00 | 0.00 | D | C |
| ATOM | 14339 | CD2 | LEU A 135 | -38.474 | -53.781 | -79.990 | 1.00 | 0.00 | D | C |
| ATOM | 14340 | C   | LEU A 135 | -41.185 | -52.705 | -76.427 | 1.00 | 0.00 | D | C |
| ATOM | 14341 | O   | LEU A 135 | -42.228 | -53.330 | -76.248 | 1.00 | 0.00 | D | O |
| ATOM | 14342 | N   | PHE A 136 | -40.169 | -52.743 | -75.542 | 1.00 | 0.00 | D | N |
| ATOM | 14343 | CA  | PHE A 136 | -40.222 | -53.574 | -74.366 | 1.00 | 0.00 | D | C |
| ATOM | 14344 | CB  | PHE A 136 | -38.910 | -53.511 | -73.558 | 1.00 | 0.00 | D | C |

|      |       |     |           |         |         |         |      |      |   |   |
|------|-------|-----|-----------|---------|---------|---------|------|------|---|---|
| ATOM | 14345 | CG  | PHE A 136 | -39.142 | -54.071 | -72.195 | 1.00 | 0.00 | D | C |
| ATOM | 14346 | CD1 | PHE A 136 | -39.197 | -55.429 | -71.981 | 1.00 | 0.00 | D | C |
| ATOM | 14347 | CE1 | PHE A 136 | -39.414 | -55.926 | -70.719 | 1.00 | 0.00 | D | C |
| ATOM | 14348 | CZ  | PHE A 136 | -39.583 | -55.064 | -69.662 | 1.00 | 0.00 | D | C |
| ATOM | 14349 | CD2 | PHE A 136 | -39.321 | -53.215 | -71.133 | 1.00 | 0.00 | D | C |
| ATOM | 14350 | CE2 | PHE A 136 | -39.538 | -53.705 | -69.869 | 1.00 | 0.00 | D | C |
| ATOM | 14351 | C   | PHE A 136 | -41.366 | -53.210 | -73.460 | 1.00 | 0.00 | D | C |
| ATOM | 14352 | O   | PHE A 136 | -42.197 | -54.058 | -73.134 | 1.00 | 0.00 | D | O |
| ATOM | 14353 | N   | LEU A 137 | -41.469 | -51.929 | -73.060 | 1.00 | 0.00 | D | N |
| ATOM | 14354 | CA  | LEU A 137 | -42.486 | -51.479 | -72.153 | 1.00 | 0.00 | D | C |
| ATOM | 14355 | CB  | LEU A 137 | -42.270 | -50.084 | -71.516 | 1.00 | 0.00 | D | C |
| ATOM | 14356 | CG  | LEU A 137 | -42.039 | -48.902 | -72.475 | 1.00 | 0.00 | D | C |
| ATOM | 14357 | CD1 | LEU A 137 | -41.871 | -47.584 | -71.697 | 1.00 | 0.00 | D | C |
| ATOM | 14358 | CD2 | LEU A 137 | -40.834 | -49.167 | -73.382 | 1.00 | 0.00 | D | C |
| ATOM | 14359 | C   | LEU A 137 | -43.822 | -51.513 | -72.815 | 1.00 | 0.00 | D | C |
| ATOM | 14360 | O   | LEU A 137 | -44.835 | -51.267 | -72.164 | 1.00 | 0.00 | D | O |
| ATOM | 14361 | N   | GLN A 138 | -43.847 | -51.628 | -74.157 | 1.00 | 0.00 | D | N |
| ATOM | 14362 | CA  | GLN A 138 | -45.100 | -51.771 | -74.837 | 1.00 | 0.00 | D | C |
| ATOM | 14363 | CB  | GLN A 138 | -44.941 | -51.693 | -76.365 | 1.00 | 0.00 | D | C |
| ATOM | 14364 | CG  | GLN A 138 | -44.481 | -50.319 | -76.860 | 1.00 | 0.00 | D | C |
| ATOM | 14365 | CD  | GLN A 138 | -44.358 | -50.367 | -78.378 | 1.00 | 0.00 | D | C |
| ATOM | 14366 | OE1 | GLN A 138 | -44.377 | -51.439 | -78.983 | 1.00 | 0.00 | D | O |
| ATOM | 14367 | NE2 | GLN A 138 | -44.220 | -49.175 | -79.015 | 1.00 | 0.00 | D | N |
| ATOM | 14368 | C   | GLN A 138 | -45.706 | -53.107 | -74.501 | 1.00 | 0.00 | D | C |
| ATOM | 14369 | O   | GLN A 138 | -46.888 | -53.185 | -74.163 | 1.00 | 0.00 | D | O |
| ATOM | 14370 | N   | LYS A 139 | -44.918 | -54.202 | -74.591 | 1.00 | 0.00 | D | N |
| ATOM | 14371 | CA  | LYS A 139 | -45.469 | -55.501 | -74.300 | 1.00 | 0.00 | D | C |
| ATOM | 14372 | CB  | LYS A 139 | -44.507 | -56.669 | -74.547 | 1.00 | 0.00 | D | C |
| ATOM | 14373 | CG  | LYS A 139 | -45.130 | -57.991 | -74.089 | 1.00 | 0.00 | D | C |
| ATOM | 14374 | CD  | LYS A 139 | -44.250 | -59.220 | -74.299 | 1.00 | 0.00 | D | C |
| ATOM | 14375 | CE  | LYS A 139 | -44.813 | -60.481 | -73.640 | 1.00 | 0.00 | D | C |
| ATOM | 14376 | NZ  | LYS A 139 | -43.850 | -61.595 | -73.776 | 1.00 | 0.00 | D | N |
| ATOM | 14377 | C   | LYS A 139 | -45.817 | -55.618 | -72.854 | 1.00 | 0.00 | D | C |
| ATOM | 14378 | O   | LYS A 139 | -46.959 | -55.909 | -72.498 | 1.00 | 0.00 | D | O |
| ATOM | 14379 | N   | SER A 140 | -44.818 | -55.373 | -71.989 | 1.00 | 0.00 | D | N |
| ATOM | 14380 | CA  | SER A 140 | -44.958 | -55.514 | -70.569 | 1.00 | 0.00 | D | C |
| ATOM | 14381 | CB  | SER A 140 | -43.611 | -55.447 | -69.828 | 1.00 | 0.00 | D | C |
| ATOM | 14382 | OG  | SER A 140 | -42.996 | -54.186 | -70.037 | 1.00 | 0.00 | D | O |

ATOM 14383 C SER A 140 -45.831 -54.418 -70.056 1.00 0.00 D C  
ATOM 14384 O SER A 140 -46.369 -54.501 -68.956 1.00 0.00 D O  
ATOM 14385 N LYS A 141 -45.994 -53.352 -70.852 1.00 0.00 D N  
ATOM 14386 CA LYS A 141 -46.789 -52.235 -70.438 1.00 0.00 D C  
ATOM 14387 CB LYS A 141 -48.242 -52.593 -70.074 1.00 0.00 D C  
ATOM 14388 CG LYS A 141 -49.125 -52.995 -71.257 1.00 0.00 D C  
ATOM 14389 CD LYS A 141 -49.254 -51.917 -72.331 1.00 0.00 D C  
ATOM 14390 CE LYS A 141 -50.394 -52.177 -73.317 1.00 0.00 D C  
ATOM 14391 NZ LYS A 141 -50.261 -53.523 -73.917 1.00 0.00 D N  
ATOM 14392 C LYS A 141 -46.172 -51.644 -69.211 1.00 0.00 D C  
ATOM 14393 O LYS A 141 -46.857 -51.007 -68.414 1.00 0.00 D O  
ATOM 14394 N LYS A 142 -44.849 -51.830 -69.032 1.00 0.00 D N  
ATOM 14395 CA LYS A 142 -44.175 -51.249 -67.907 1.00 0.00 D C  
ATOM 14396 CB LYS A 142 -42.793 -51.861 -67.613 1.00 0.00 D C  
ATOM 14397 CG LYS A 142 -42.864 -53.214 -66.901 1.00 0.00 D C  
ATOM 14398 CD LYS A 142 -41.533 -53.969 -66.865 1.00 0.00 D C  
ATOM 14399 CE LYS A 142 -41.501 -55.100 -65.834 1.00 0.00 D C  
ATOM 14400 NZ LYS A 142 -42.597 -56.062 -66.089 1.00 0.00 D N  
ATOM 14401 C LYS A 142 -43.975 -49.802 -68.213 1.00 0.00 D C  
ATOM 14402 O LYS A 142 -43.986 -49.398 -69.374 1.00 0.00 D O  
ATOM 14403 N HSD A 143 -43.807 -48.967 -67.165 1.00 0.00 D N  
ATOM 14404 CA HSD A 143 -43.628 -47.568 -67.415 1.00 0.00 D C  
ATOM 14405 CB HSD A 143 -44.636 -46.659 -66.685 1.00 0.00 D C  
ATOM 14406 ND1 HSD A 143 -46.497 -46.188 -68.354 1.00 0.00 D N  
ATOM 14407 CG HSD A 143 -46.042 -46.783 -67.196 1.00 0.00 D C  
ATOM 14408 CE1 HSD A 143 -47.805 -46.519 -68.476 1.00 0.00 D C  
ATOM 14409 NE2 HSD A 143 -48.225 -47.281 -67.481 1.00 0.00 D N  
ATOM 14410 CD2 HSD A 143 -47.110 -47.444 -66.676 1.00 0.00 D C  
ATOM 14411 C HSD A 143 -42.262 -47.161 -66.966 1.00 0.00 D C  
ATOM 14412 O HSD A 143 -41.702 -47.698 -66.012 1.00 0.00 D O  
ATOM 14413 N LEU A 144 -41.712 -46.144 -67.651 1.00 0.00 D N  
ATOM 14414 CA LEU A 144 -40.403 -45.612 -67.414 1.00 0.00 D C  
ATOM 14415 CB LEU A 144 -40.070 -44.480 -68.404 1.00 0.00 D C  
ATOM 14416 CG LEU A 144 -38.616 -43.988 -68.343 1.00 0.00 D C  
ATOM 14417 CD1 LEU A 144 -37.647 -45.117 -68.726 1.00 0.00 D C  
ATOM 14418 CD2 LEU A 144 -38.414 -42.733 -69.206 1.00 0.00 D C  
ATOM 14419 C LEU A 144 -40.395 -45.055 -66.016 1.00 0.00 D C  
ATOM 14420 O LEU A 144 -39.344 -44.854 -65.412 1.00 0.00 D O



ATOM 14421 N THR A 145 -41.595 -44.684 -65.539 1.00 0.00 D N  
ATOM 14422 CA THR A 145 -41.919 -44.125 -64.249 1.00 0.00 D C  
ATOM 14423 CB THR A 145 -43.222 -43.389 -64.270 1.00 0.00 D C  
ATOM 14424 OG1 THR A 145 -44.278 -44.272 -64.615 1.00 0.00 D O  
ATOM 14425 CG2 THR A 145 -43.118 -42.252 -65.301 1.00 0.00 D C  
ATOM 14426 C THR A 145 -41.999 -45.133 -63.137 1.00 0.00 D C  
ATOM 14427 O THR A 145 -41.960 -44.745 -61.972 1.00 0.00 D O  
ATOM 14428 N ASP A 146 -42.169 -46.437 -63.439 1.00 0.00 D N  
ATOM 14429 CA ASP A 146 -42.417 -47.415 -62.405 1.00 0.00 D C  
ATOM 14430 CB ASP A 146 -42.450 -48.862 -62.921 1.00 0.00 D C  
ATOM 14431 CG ASP A 146 -43.714 -49.048 -63.746 1.00 0.00 D C  
ATOM 14432 OD1 ASP A 146 -44.579 -48.129 -63.728 1.00 0.00 D O  
ATOM 14433 OD2 ASP A 146 -43.836 -50.116 -64.403 1.00 0.00 D O  
ATOM 14434 C ASP A 146 -41.372 -47.344 -61.333 1.00 0.00 D C  
ATOM 14435 O ASP A 146 -40.265 -46.849 -61.535 1.00 0.00 D O  
ATOM 14436 N ASN A 147 -41.731 -47.861 -60.140 1.00 0.00 D N  
ATOM 14437 CA ASN A 147 -40.906 -47.818 -58.962 1.00 0.00 D C  
ATOM 14438 CB ASN A 147 -41.558 -48.488 -57.741 1.00 0.00 D C  
ATOM 14439 CG ASN A 147 -42.760 -47.654 -57.317 1.00 0.00 D C  
ATOM 14440 OD1 ASN A 147 -43.863 -48.177 -57.163 1.00 0.00 D O  
ATOM 14441 ND2 ASN A 147 -42.548 -46.326 -57.119 1.00 0.00 D N  
ATOM 14442 C ASN A 147 -39.618 -48.533 -59.242 1.00 0.00 D C  
ATOM 14443 O ASN A 147 -38.566 -48.152 -58.731 1.00 0.00 D O  
ATOM 14444 N GLU A 148 -39.681 -49.582 -60.082 1.00 0.00 D N  
ATOM 14445 CA GLU A 148 -38.573 -50.434 -60.433 1.00 0.00 D C  
ATOM 14446 CB GLU A 148 -38.941 -51.422 -61.554 1.00 0.00 D C  
ATOM 14447 CG GLU A 148 -40.137 -52.331 -61.293 1.00 0.00 D C  
ATOM 14448 CD GLU A 148 -40.574 -52.868 -62.652 1.00 0.00 D C  
ATOM 14449 OE1 GLU A 148 -40.643 -52.056 -63.615 1.00 0.00 D O  
ATOM 14450 OE2 GLU A 148 -40.842 -54.094 -62.751 1.00 0.00 D O  
ATOM 14451 C GLU A 148 -37.499 -49.619 -61.090 1.00 0.00 D C  
ATOM 14452 O GLU A 148 -36.309 -49.903 -60.966 1.00 0.00 D O  
ATOM 14453 N PHE A 149 -37.931 -48.627 -61.880 1.00 0.00 D N  
ATOM 14454 CA PHE A 149 -37.134 -47.756 -62.694 1.00 0.00 D C  
ATOM 14455 CB PHE A 149 -37.924 -47.113 -63.847 1.00 0.00 D C  
ATOM 14456 CG PHE A 149 -38.207 -48.221 -64.806 1.00 0.00 D C  
ATOM 14457 CD1 PHE A 149 -37.214 -48.686 -65.639 1.00 0.00 D C  
ATOM 14458 CE1 PHE A 149 -37.457 -49.707 -66.530 1.00 0.00 D C

|      |       |     |           |         |         |         |      |      |   |   |
|------|-------|-----|-----------|---------|---------|---------|------|------|---|---|
| ATOM | 14459 | CZ  | PHE A 149 | -38.705 | -50.280 | -66.597 | 1.00 | 0.00 | D | C |
| ATOM | 14460 | CD2 | PHE A 149 | -39.452 | -48.800 | -64.883 | 1.00 | 0.00 | D | C |
| ATOM | 14461 | CE2 | PHE A 149 | -39.704 | -49.822 | -65.772 | 1.00 | 0.00 | D | C |
| ATOM | 14462 | C   | PHE A 149 | -36.409 | -46.699 | -61.911 | 1.00 | 0.00 | D | C |
| ATOM | 14463 | O   | PHE A 149 | -35.593 | -45.975 | -62.478 | 1.00 | 0.00 | D | O |
| ATOM | 14464 | N   | LYS A 150 | -36.773 | -46.476 | -60.635 | 1.00 | 0.00 | D | N |
| ATOM | 14465 | CA  | LYS A 150 | -36.132 | -45.431 | -59.878 | 1.00 | 0.00 | D | C |
| ATOM | 14466 | CB  | LYS A 150 | -37.134 | -44.597 | -59.070 | 1.00 | 0.00 | D | C |
| ATOM | 14467 | CG  | LYS A 150 | -38.338 | -44.086 | -59.857 | 1.00 | 0.00 | D | C |
| ATOM | 14468 | CD  | LYS A 150 | -39.465 | -43.630 | -58.925 | 1.00 | 0.00 | D | C |
| ATOM | 14469 | CE  | LYS A 150 | -40.799 | -43.367 | -59.620 | 1.00 | 0.00 | D | C |
| ATOM | 14470 | NZ  | LYS A 150 | -41.854 | -43.145 | -58.606 | 1.00 | 0.00 | D | N |
| ATOM | 14471 | C   | LYS A 150 | -35.237 | -46.029 | -58.829 | 1.00 | 0.00 | D | C |
| ATOM | 14472 | O   | LYS A 150 | -35.422 | -47.169 | -58.405 | 1.00 | 0.00 | D | O |
| ATOM | 14473 | N   | ASP A 151 | -34.213 | -45.256 | -58.393 | 1.00 | 0.00 | D | N |
| ATOM | 14474 | CA  | ASP A 151 | -33.359 | -45.670 | -57.314 | 1.00 | 0.00 | D | C |
| ATOM | 14475 | CB  | ASP A 151 | -32.145 | -44.737 | -57.131 | 1.00 | 0.00 | D | C |
| ATOM | 14476 | CG  | ASP A 151 | -31.217 | -45.260 | -56.042 | 1.00 | 0.00 | D | C |
| ATOM | 14477 | OD1 | ASP A 151 | -31.530 | -46.317 | -55.430 | 1.00 | 0.00 | D | O |
| ATOM | 14478 | OD2 | ASP A 151 | -30.171 | -44.597 | -55.808 | 1.00 | 0.00 | D | O |
| ATOM | 14479 | C   | ASP A 151 | -34.204 | -45.599 | -56.083 | 1.00 | 0.00 | D | C |
| ATOM | 14480 | O   | ASP A 151 | -34.831 | -44.579 | -55.790 | 1.00 | 0.00 | D | O |
| ATOM | 14481 | N   | PRO A 152 | -34.204 | -46.658 | -55.334 | 1.00 | 0.00 | D | N |
| ATOM | 14482 | CD  | PRO A 152 | -33.792 | -47.959 | -55.834 | 1.00 | 0.00 | D | C |
| ATOM | 14483 | CA  | PRO A 152 | -35.066 | -46.762 | -54.194 | 1.00 | 0.00 | D | C |
| ATOM | 14484 | CB  | PRO A 152 | -34.953 | -48.217 | -53.724 | 1.00 | 0.00 | D | C |
| ATOM | 14485 | CG  | PRO A 152 | -33.815 | -48.828 | -54.571 | 1.00 | 0.00 | D | C |
| ATOM | 14486 | C   | PRO A 152 | -34.863 | -45.739 | -53.115 | 1.00 | 0.00 | D | C |
| ATOM | 14487 | O   | PRO A 152 | -35.832 | -45.460 | -52.406 | 1.00 | 0.00 | D | O |
| ATOM | 14488 | N   | GLU A 153 | -33.622 | -45.265 | -52.873 | 1.00 | 0.00 | D | N |
| ATOM | 14489 | CA  | GLU A 153 | -33.425 | -44.258 | -51.860 | 1.00 | 0.00 | D | C |
| ATOM | 14490 | CB  | GLU A 153 | -32.006 | -44.268 | -51.256 | 1.00 | 0.00 | D | C |
| ATOM | 14491 | CG  | GLU A 153 | -30.871 | -44.169 | -52.278 | 1.00 | 0.00 | D | C |
| ATOM | 14492 | CD  | GLU A 153 | -30.274 | -45.561 | -52.446 | 1.00 | 0.00 | D | C |
| ATOM | 14493 | OE1 | GLU A 153 | -30.627 | -46.456 | -51.630 | 1.00 | 0.00 | D | O |
| ATOM | 14494 | OE2 | GLU A 153 | -29.454 | -45.746 | -53.383 | 1.00 | 0.00 | D | O |
| ATOM | 14495 | C   | GLU A 153 | -33.704 | -42.848 | -52.322 | 1.00 | 0.00 | D | C |
| ATOM | 14496 | O   | GLU A 153 | -34.415 | -42.098 | -51.651 | 1.00 | 0.00 | D | O |

ATOM 14497 N THR A 154 -33.070 -42.451 -53.452 1.00 0.00 D N  
ATOM 14498 CA THR A 154 -33.104 -41.125 -54.024 1.00 0.00 D C  
ATOM 14499 CB THR A 154 -31.923 -40.860 -54.911 1.00 0.00 D C  
ATOM 14500 OG1 THR A 154 -31.919 -41.761 -56.008 1.00 0.00 D O  
ATOM 14501 CG2 THR A 154 -30.641 -41.031 -54.084 1.00 0.00 D C  
ATOM 14502 C THR A 154 -34.336 -40.809 -54.825 1.00 0.00 D C  
ATOM 14503 O THR A 154 -34.865 -39.699 -54.747 1.00 0.00 D O  
ATOM 14504 N GLY A 155 -34.825 -41.768 -55.636 1.00 0.00 D N  
ATOM 14505 CA GLY A 155 -35.950 -41.497 -56.491 1.00 0.00 D C  
ATOM 14506 C GLY A 155 -35.451 -41.031 -57.832 1.00 0.00 D C  
ATOM 14507 O GLY A 155 -36.213 -40.486 -58.630 1.00 0.00 D O  
ATOM 14508 N LYS A 156 -34.150 -41.240 -58.111 1.00 0.00 D N  
ATOM 14509 CA LYS A 156 -33.526 -40.855 -59.349 1.00 0.00 D C  
ATOM 14510 CB LYS A 156 -31.998 -41.036 -59.299 1.00 0.00 D C  
ATOM 14511 CG LYS A 156 -31.244 -40.571 -60.546 1.00 0.00 D C  
ATOM 14512 CD LYS A 156 -29.727 -40.563 -60.351 1.00 0.00 D C  
ATOM 14513 CE LYS A 156 -29.203 -41.826 -59.659 1.00 0.00 D C  
ATOM 14514 NZ LYS A 156 -27.733 -41.759 -59.500 1.00 0.00 D N  
ATOM 14515 C LYS A 156 -34.063 -41.709 -60.464 1.00 0.00 D C  
ATOM 14516 O LYS A 156 -34.353 -42.892 -60.279 1.00 0.00 D O  
ATOM 14517 N THR A 157 -34.209 -41.104 -61.662 1.00 0.00 D N  
ATOM 14518 CA THR A 157 -34.709 -41.793 -62.820 1.00 0.00 D C  
ATOM 14519 CB THR A 157 -35.939 -41.160 -63.398 1.00 0.00 D C  
ATOM 14520 OG1 THR A 157 -35.651 -39.840 -63.834 1.00 0.00 D O  
ATOM 14521 CG2 THR A 157 -37.026 -41.133 -62.309 1.00 0.00 D C  
ATOM 14522 C THR A 157 -33.631 -41.735 -63.852 1.00 0.00 D C  
ATOM 14523 O THR A 157 -32.609 -41.079 -63.658 1.00 0.00 D O  
ATOM 14524 N CYS A 158 -33.829 -42.438 -64.983 1.00 0.00 D N  
ATOM 14525 CA CYS A 158 -32.831 -42.496 -66.012 1.00 0.00 D C  
ATOM 14526 CB CYS A 158 -33.245 -43.410 -67.176 1.00 0.00 D C  
ATOM 14527 SG CYS A 158 -34.823 -42.909 -67.924 1.00 0.00 D S  
ATOM 14528 C CYS A 158 -32.590 -41.117 -66.539 1.00 0.00 D C  
ATOM 14529 O CYS A 158 -31.448 -40.739 -66.802 1.00 0.00 D O  
ATOM 14530 N LEU A 159 -33.653 -40.310 -66.695 1.00 0.00 D N  
ATOM 14531 CA LEU A 159 -33.459 -38.989 -67.214 1.00 0.00 D C  
ATOM 14532 CB LEU A 159 -34.753 -38.174 -67.350 1.00 0.00 D C  
ATOM 14533 CG LEU A 159 -34.484 -36.775 -67.932 1.00 0.00 D C  
ATOM 14534 CD1 LEU A 159 -34.111 -36.855 -69.419 1.00 0.00 D C

|      |       |     |     |   |     |         |         |         |      |      |   |   |
|------|-------|-----|-----|---|-----|---------|---------|---------|------|------|---|---|
| ATOM | 14535 | CD2 | LEU | A | 159 | -35.631 | -35.804 | -67.654 | 1.00 | 0.00 | D | C |
| ATOM | 14536 | C   | LEU | A | 159 | -32.570 | -38.239 | -66.265 | 1.00 | 0.00 | D | C |
| ATOM | 14537 | O   | LEU | A | 159 | -31.717 | -37.461 | -66.688 | 1.00 | 0.00 | D | O |
| ATOM | 14538 | N   | LEU | A | 160 | -32.770 | -38.436 | -64.949 | 1.00 | 0.00 | D | N |
| ATOM | 14539 | CA  | LEU | A | 160 | -31.961 | -37.765 | -63.968 | 1.00 | 0.00 | D | C |
| ATOM | 14540 | CB  | LEU | A | 160 | -32.481 | -37.980 | -62.535 | 1.00 | 0.00 | D | C |
| ATOM | 14541 | CG  | LEU | A | 160 | -33.820 | -37.260 | -62.266 | 1.00 | 0.00 | D | C |
| ATOM | 14542 | CD1 | LEU | A | 160 | -34.312 | -37.490 | -60.827 | 1.00 | 0.00 | D | C |
| ATOM | 14543 | CD2 | LEU | A | 160 | -33.718 | -35.763 | -62.600 | 1.00 | 0.00 | D | C |
| ATOM | 14544 | C   | LEU | A | 160 | -30.543 | -38.250 | -64.061 | 1.00 | 0.00 | D | C |
| ATOM | 14545 | O   | LEU | A | 160 | -29.612 | -37.450 | -63.987 | 1.00 | 0.00 | D | O |
| ATOM | 14546 | N   | LYS | A | 161 | -30.324 | -39.572 | -64.236 | 1.00 | 0.00 | D | N |
| ATOM | 14547 | CA  | LYS | A | 161 | -28.962 | -40.033 | -64.324 | 1.00 | 0.00 | D | C |
| ATOM | 14548 | CB  | LYS | A | 161 | -28.766 | -41.553 | -64.458 | 1.00 | 0.00 | D | C |
| ATOM | 14549 | CG  | LYS | A | 161 | -27.269 | -41.878 | -64.533 | 1.00 | 0.00 | D | C |
| ATOM | 14550 | CD  | LYS | A | 161 | -26.883 | -43.330 | -64.258 | 1.00 | 0.00 | D | C |
| ATOM | 14551 | CE  | LYS | A | 161 | -25.375 | -43.579 | -64.367 | 1.00 | 0.00 | D | C |
| ATOM | 14552 | NZ  | LYS | A | 161 | -25.053 | -44.958 | -63.938 | 1.00 | 0.00 | D | N |
| ATOM | 14553 | C   | LYS | A | 161 | -28.341 | -39.397 | -65.522 | 1.00 | 0.00 | D | C |
| ATOM | 14554 | O   | LYS | A | 161 | -27.170 | -39.022 | -65.503 | 1.00 | 0.00 | D | O |
| ATOM | 14555 | N   | ALA | A | 162 | -29.130 | -39.255 | -66.598 | 1.00 | 0.00 | D | N |
| ATOM | 14556 | CA  | ALA | A | 162 | -28.655 | -38.659 | -67.810 | 1.00 | 0.00 | D | C |
| ATOM | 14557 | CB  | ALA | A | 162 | -29.746 | -38.596 | -68.897 | 1.00 | 0.00 | D | C |
| ATOM | 14558 | C   | ALA | A | 162 | -28.239 | -37.257 | -67.497 | 1.00 | 0.00 | D | C |
| ATOM | 14559 | O   | ALA | A | 162 | -27.248 | -36.757 | -68.029 | 1.00 | 0.00 | D | O |
| ATOM | 14560 | N   | MET | A | 163 | -28.995 | -36.579 | -66.611 | 1.00 | 0.00 | D | N |
| ATOM | 14561 | CA  | MET | A | 163 | -28.706 | -35.218 | -66.269 | 1.00 | 0.00 | D | C |
| ATOM | 14562 | CB  | MET | A | 163 | -29.779 | -34.594 | -65.360 | 1.00 | 0.00 | D | C |
| ATOM | 14563 | CG  | MET | A | 163 | -31.111 | -34.410 | -66.092 | 1.00 | 0.00 | D | C |
| ATOM | 14564 | SD  | MET | A | 163 | -31.026 | -33.226 | -67.470 | 1.00 | 0.00 | D | S |
| ATOM | 14565 | CE  | MET | A | 163 | -32.631 | -33.677 | -68.188 | 1.00 | 0.00 | D | C |
| ATOM | 14566 | C   | MET | A | 163 | -27.371 | -35.134 | -65.596 | 1.00 | 0.00 | D | C |
| ATOM | 14567 | O   | MET | A | 163 | -26.639 | -34.163 | -65.789 | 1.00 | 0.00 | D | O |
| ATOM | 14568 | N   | LEU | A | 164 | -27.040 | -36.109 | -64.728 | 1.00 | 0.00 | D | N |
| ATOM | 14569 | CA  | LEU | A | 164 | -25.754 | -36.120 | -64.088 | 1.00 | 0.00 | D | C |
| ATOM | 14570 | CB  | LEU | A | 164 | -25.674 | -37.061 | -62.877 | 1.00 | 0.00 | D | C |
| ATOM | 14571 | CG  | LEU | A | 164 | -26.495 | -36.566 | -61.669 | 1.00 | 0.00 | D | C |
| ATOM | 14572 | CD1 | LEU | A | 164 | -25.991 | -35.197 | -61.182 | 1.00 | 0.00 | D | C |

|      |       |     |     |   |     |         |         |         |      |      |   |   |
|------|-------|-----|-----|---|-----|---------|---------|---------|------|------|---|---|
| ATOM | 14573 | CD2 | LEU | A | 164 | -28.002 | -36.572 | -61.950 | 1.00 | 0.00 | D | C |
| ATOM | 14574 | C   | LEU | A | 164 | -24.681 | -36.505 | -65.060 | 1.00 | 0.00 | D | C |
| ATOM | 14575 | O   | LEU | A | 164 | -23.579 | -35.955 | -65.030 | 1.00 | 0.00 | D | O |
| ATOM | 14576 | N   | ASN | A | 165 | -24.963 | -37.471 | -65.955 | 1.00 | 0.00 | D | N |
| ATOM | 14577 | CA  | ASN | A | 165 | -23.923 | -37.920 | -66.833 | 1.00 | 0.00 | D | C |
| ATOM | 14578 | CB  | ASN | A | 165 | -24.084 | -39.392 | -67.260 | 1.00 | 0.00 | D | C |
| ATOM | 14579 | CG  | ASN | A | 165 | -23.862 | -40.311 | -66.059 | 1.00 | 0.00 | D | C |
| ATOM | 14580 | OD1 | ASN | A | 165 | -23.538 | -41.485 | -66.236 | 1.00 | 0.00 | D | O |
| ATOM | 14581 | ND2 | ASN | A | 165 | -24.039 | -39.787 | -64.818 | 1.00 | 0.00 | D | N |
| ATOM | 14582 | C   | ASN | A | 165 | -23.960 | -37.103 | -68.083 | 1.00 | 0.00 | D | C |
| ATOM | 14583 | O   | ASN | A | 165 | -24.381 | -37.578 | -69.138 | 1.00 | 0.00 | D | O |
| ATOM | 14584 | N   | LEU | A | 166 | -23.476 | -35.850 | -68.010 | 1.00 | 0.00 | D | N |
| ATOM | 14585 | CA  | LEU | A | 166 | -23.461 | -35.040 | -69.190 | 1.00 | 0.00 | D | C |
| ATOM | 14586 | CB  | LEU | A | 166 | -23.900 | -33.582 | -68.970 | 1.00 | 0.00 | D | C |
| ATOM | 14587 | CG  | LEU | A | 166 | -25.395 | -33.423 | -68.645 | 1.00 | 0.00 | D | C |
| ATOM | 14588 | CD1 | LEU | A | 166 | -25.762 | -31.946 | -68.438 | 1.00 | 0.00 | D | C |
| ATOM | 14589 | CD2 | LEU | A | 166 | -26.270 | -34.100 | -69.713 | 1.00 | 0.00 | D | C |
| ATOM | 14590 | C   | LEU | A | 166 | -22.066 | -34.997 | -69.710 | 1.00 | 0.00 | D | C |
| ATOM | 14591 | O   | LEU | A | 166 | -21.104 | -35.086 | -68.951 | 1.00 | 0.00 | D | O |
| ATOM | 14592 | N   | HSD | A | 167 | -21.940 | -34.918 | -71.048 | 1.00 | 0.00 | D | N |
| ATOM | 14593 | CA  | HSD | A | 167 | -20.659 | -34.745 | -71.664 | 1.00 | 0.00 | D | C |
| ATOM | 14594 | CB  | HSD | A | 167 | -20.196 | -35.941 | -72.519 | 1.00 | 0.00 | D | C |
| ATOM | 14595 | ND1 | HSD | A | 167 | -22.273 | -36.653 | -73.803 | 1.00 | 0.00 | D | N |
| ATOM | 14596 | CG  | HSD | A | 167 | -20.989 | -36.159 | -73.775 | 1.00 | 0.00 | D | C |
| ATOM | 14597 | CE1 | HSD | A | 167 | -22.646 | -36.698 | -75.107 | 1.00 | 0.00 | D | C |
| ATOM | 14598 | NE2 | HSD | A | 167 | -21.694 | -36.267 | -75.915 | 1.00 | 0.00 | D | N |
| ATOM | 14599 | CD2 | HSD | A | 167 | -20.650 | -35.928 | -75.074 | 1.00 | 0.00 | D | C |
| ATOM | 14600 | C   | HSD | A | 167 | -20.819 | -33.545 | -72.546 | 1.00 | 0.00 | D | C |
| ATOM | 14601 | O   | HSD | A | 167 | -21.698 | -33.502 | -73.407 | 1.00 | 0.00 | D | O |
| ATOM | 14602 | N   | ASP | A | 168 | -19.982 | -32.514 | -72.329 | 1.00 | 0.00 | D | N |
| ATOM | 14603 | CA  | ASP | A | 168 | -20.068 | -31.312 | -73.106 | 1.00 | 0.00 | D | C |
| ATOM | 14604 | CB  | ASP | A | 168 | -19.663 | -31.498 | -74.582 | 1.00 | 0.00 | D | C |
| ATOM | 14605 | CG  | ASP | A | 168 | -18.143 | -31.442 | -74.661 | 1.00 | 0.00 | D | C |
| ATOM | 14606 | OD1 | ASP | A | 168 | -17.598 | -30.308 | -74.561 | 1.00 | 0.00 | D | O |
| ATOM | 14607 | OD2 | ASP | A | 168 | -17.504 | -32.516 | -74.807 | 1.00 | 0.00 | D | O |
| ATOM | 14608 | C   | ASP | A | 168 | -21.456 | -30.756 | -73.039 | 1.00 | 0.00 | D | C |
| ATOM | 14609 | O   | ASP | A | 168 | -21.947 | -30.184 | -74.012 | 1.00 | 0.00 | D | O |
| ATOM | 14610 | N   | GLY | A | 169 | -22.127 | -30.899 | -71.880 | 1.00 | 0.00 | D | N |

|      |       |     |           |         |         |         |      |      |   |   |
|------|-------|-----|-----------|---------|---------|---------|------|------|---|---|
| ATOM | 14611 | CA  | GLY A 169 | -23.429 | -30.325 | -71.689 | 1.00 | 0.00 | D | C |
| ATOM | 14612 | C   | GLY A 169 | -24.400 | -30.952 | -72.640 | 1.00 | 0.00 | D | C |
| ATOM | 14613 | O   | GLY A 169 | -25.392 | -30.323 | -73.007 | 1.00 | 0.00 | D | O |
| ATOM | 14614 | N   | GLN A 170 | -24.153 | -32.212 | -73.059 | 1.00 | 0.00 | D | N |
| ATOM | 14615 | CA  | GLN A 170 | -25.029 | -32.823 | -74.023 | 1.00 | 0.00 | D | C |
| ATOM | 14616 | CB  | GLN A 170 | -24.440 | -32.847 | -75.442 | 1.00 | 0.00 | D | C |
| ATOM | 14617 | CG  | GLN A 170 | -24.227 | -31.458 | -76.041 | 1.00 | 0.00 | D | C |
| ATOM | 14618 | CD  | GLN A 170 | -23.533 | -31.628 | -77.387 | 1.00 | 0.00 | D | C |
| ATOM | 14619 | OE1 | GLN A 170 | -22.438 | -31.112 | -77.603 | 1.00 | 0.00 | D | O |
| ATOM | 14620 | NE2 | GLN A 170 | -24.184 | -32.375 | -78.317 | 1.00 | 0.00 | D | N |
| ATOM | 14621 | C   | GLN A 170 | -25.312 | -34.251 | -73.669 | 1.00 | 0.00 | D | C |
| ATOM | 14622 | O   | GLN A 170 | -24.479 | -34.948 | -73.087 | 1.00 | 0.00 | D | O |
| ATOM | 14623 | N   | ASN A 171 | -26.538 | -34.704 | -74.007 | 1.00 | 0.00 | D | N |
| ATOM | 14624 | CA  | ASN A 171 | -26.939 | -36.071 | -73.826 | 1.00 | 0.00 | D | C |
| ATOM | 14625 | CB  | ASN A 171 | -27.296 | -36.376 | -72.358 | 1.00 | 0.00 | D | C |
| ATOM | 14626 | CG  | ASN A 171 | -27.350 | -37.879 | -72.150 | 1.00 | 0.00 | D | C |
| ATOM | 14627 | OD1 | ASN A 171 | -27.509 | -38.647 | -73.097 | 1.00 | 0.00 | D | O |
| ATOM | 14628 | ND2 | ASN A 171 | -27.218 | -38.312 | -70.868 | 1.00 | 0.00 | D | N |
| ATOM | 14629 | C   | ASN A 171 | -28.180 | -36.257 | -74.656 | 1.00 | 0.00 | D | C |
| ATOM | 14630 | O   | ASN A 171 | -29.194 | -35.601 | -74.426 | 1.00 | 0.00 | D | O |
| ATOM | 14631 | N   | THR A 172 | -28.093 | -37.121 | -75.687 | 1.00 | 0.00 | D | N |
| ATOM | 14632 | CA  | THR A 172 | -29.136 | -37.490 | -76.609 | 1.00 | 0.00 | D | C |
| ATOM | 14633 | CB  | THR A 172 | -28.581 | -38.057 | -77.877 | 1.00 | 0.00 | D | C |
| ATOM | 14634 | OG1 | THR A 172 | -27.817 | -39.221 | -77.603 | 1.00 | 0.00 | D | O |
| ATOM | 14635 | CG2 | THR A 172 | -27.691 | -36.986 | -78.533 | 1.00 | 0.00 | D | C |
| ATOM | 14636 | C   | THR A 172 | -30.053 | -38.503 | -75.999 | 1.00 | 0.00 | D | C |
| ATOM | 14637 | O   | THR A 172 | -31.186 | -38.685 | -76.443 | 1.00 | 0.00 | D | O |
| ATOM | 14638 | N   | THR A 173 | -29.548 | -39.240 | -74.995 | 1.00 | 0.00 | D | N |
| ATOM | 14639 | CA  | THR A 173 | -30.311 | -40.243 | -74.323 | 1.00 | 0.00 | D | C |
| ATOM | 14640 | CB  | THR A 173 | -29.553 | -40.861 | -73.181 | 1.00 | 0.00 | D | C |
| ATOM | 14641 | OG1 | THR A 173 | -28.374 | -41.498 | -73.653 | 1.00 | 0.00 | D | O |
| ATOM | 14642 | CG2 | THR A 173 | -30.455 | -41.877 | -72.467 | 1.00 | 0.00 | D | C |
| ATOM | 14643 | C   | THR A 173 | -31.506 | -39.545 | -73.767 | 1.00 | 0.00 | D | C |
| ATOM | 14644 | O   | THR A 173 | -32.589 | -40.124 | -73.691 | 1.00 | 0.00 | D | O |
| ATOM | 14645 | N   | ILE A 174 | -31.338 | -38.278 | -73.341 | 1.00 | 0.00 | D | N |
| ATOM | 14646 | CA  | ILE A 174 | -32.447 | -37.548 | -72.802 | 1.00 | 0.00 | D | C |
| ATOM | 14647 | CB  | ILE A 174 | -32.079 | -36.185 | -72.278 | 1.00 | 0.00 | D | C |
| ATOM | 14648 | CG2 | ILE A 174 | -33.378 | -35.451 | -71.908 | 1.00 | 0.00 | D | C |

|      |       |     |     |   |     |         |         |         |      |      |   |   |
|------|-------|-----|-----|---|-----|---------|---------|---------|------|------|---|---|
| ATOM | 14649 | CG1 | ILE | A | 174 | -31.084 | -36.289 | -71.110 | 1.00 | 0.00 | D | C |
| ATOM | 14650 | CD  | ILE | A | 174 | -30.468 | -34.945 | -70.723 | 1.00 | 0.00 | D | C |
| ATOM | 14651 | C   | ILE | A | 174 | -33.491 | -37.372 | -73.866 | 1.00 | 0.00 | D | C |
| ATOM | 14652 | O   | ILE | A | 174 | -34.660 | -37.665 | -73.619 | 1.00 | 0.00 | D | O |
| ATOM | 14653 | N   | PRO | A | 175 | -33.143 | -36.944 | -75.057 | 1.00 | 0.00 | D | N |
| ATOM | 14654 | CD  | PRO | A | 175 | -31.945 | -36.156 | -75.297 | 1.00 | 0.00 | D | C |
| ATOM | 14655 | CA  | PRO | A | 175 | -34.135 | -36.746 | -76.076 | 1.00 | 0.00 | D | C |
| ATOM | 14656 | CB  | PRO | A | 175 | -33.399 | -36.116 | -77.255 | 1.00 | 0.00 | D | C |
| ATOM | 14657 | CG  | PRO | A | 175 | -32.232 | -35.363 | -76.586 | 1.00 | 0.00 | D | C |
| ATOM | 14658 | C   | PRO | A | 175 | -34.852 | -38.016 | -76.397 | 1.00 | 0.00 | D | C |
| ATOM | 14659 | O   | PRO | A | 175 | -36.051 | -37.971 | -76.663 | 1.00 | 0.00 | D | O |
| ATOM | 14660 | N   | LEU | A | 176 | -34.128 | -39.146 | -76.411 | 1.00 | 0.00 | D | N |
| ATOM | 14661 | CA  | LEU | A | 176 | -34.732 | -40.413 | -76.693 | 1.00 | 0.00 | D | C |
| ATOM | 14662 | CB  | LEU | A | 176 | -33.670 | -41.498 | -76.972 | 1.00 | 0.00 | D | C |
| ATOM | 14663 | CG  | LEU | A | 176 | -34.205 | -42.856 | -77.482 | 1.00 | 0.00 | D | C |
| ATOM | 14664 | CD1 | LEU | A | 176 | -33.040 | -43.771 | -77.887 | 1.00 | 0.00 | D | C |
| ATOM | 14665 | CD2 | LEU | A | 176 | -35.140 | -43.552 | -76.479 | 1.00 | 0.00 | D | C |
| ATOM | 14666 | C   | LEU | A | 176 | -35.585 | -40.811 | -75.527 | 1.00 | 0.00 | D | C |
| ATOM | 14667 | O   | LEU | A | 176 | -36.682 | -41.339 | -75.699 | 1.00 | 0.00 | D | O |
| ATOM | 14668 | N   | LEU | A | 177 | -35.099 | -40.560 | -74.297 | 1.00 | 0.00 | D | N |
| ATOM | 14669 | CA  | LEU | A | 177 | -35.797 | -40.986 | -73.117 | 1.00 | 0.00 | D | C |
| ATOM | 14670 | CB  | LEU | A | 177 | -35.011 | -40.707 | -71.829 | 1.00 | 0.00 | D | C |
| ATOM | 14671 | CG  | LEU | A | 177 | -33.762 | -41.598 | -71.704 | 1.00 | 0.00 | D | C |
| ATOM | 14672 | CD1 | LEU | A | 177 | -32.996 | -41.311 | -70.415 | 1.00 | 0.00 | D | C |
| ATOM | 14673 | CD2 | LEU | A | 177 | -34.115 | -43.086 | -71.847 | 1.00 | 0.00 | D | C |
| ATOM | 14674 | C   | LEU | A | 177 | -37.122 | -40.303 | -73.029 | 1.00 | 0.00 | D | C |
| ATOM | 14675 | O   | LEU | A | 177 | -38.135 | -40.935 | -72.732 | 1.00 | 0.00 | D | O |
| ATOM | 14676 | N   | LEU | A | 178 | -37.150 | -38.989 | -73.299 | 1.00 | 0.00 | D | N |
| ATOM | 14677 | CA  | LEU | A | 178 | -38.351 | -38.208 | -73.247 | 1.00 | 0.00 | D | C |
| ATOM | 14678 | CB  | LEU | A | 178 | -38.046 | -36.749 | -73.598 | 1.00 | 0.00 | D | C |
| ATOM | 14679 | CG  | LEU | A | 178 | -37.073 | -36.093 | -72.605 | 1.00 | 0.00 | D | C |
| ATOM | 14680 | CD1 | LEU | A | 178 | -36.598 | -34.727 | -73.116 | 1.00 | 0.00 | D | C |
| ATOM | 14681 | CD2 | LEU | A | 178 | -37.688 | -36.006 | -71.198 | 1.00 | 0.00 | D | C |
| ATOM | 14682 | C   | LEU | A | 178 | -39.303 | -38.722 | -74.284 | 1.00 | 0.00 | D | C |
| ATOM | 14683 | O   | LEU | A | 178 | -40.488 | -38.929 | -74.021 | 1.00 | 0.00 | D | O |
| ATOM | 14684 | N   | GLU | A | 179 | -38.782 | -38.996 | -75.492 | 1.00 | 0.00 | D | N |
| ATOM | 14685 | CA  | GLU | A | 179 | -39.593 | -39.405 | -76.604 | 1.00 | 0.00 | D | C |
| ATOM | 14686 | CB  | GLU | A | 179 | -38.731 | -39.782 | -77.819 | 1.00 | 0.00 | D | C |

ATOM 14687 CG GLU A 179 -39.528 -40.270 -79.029 1.00 0.00 D C  
ATOM 14688 CD GLU A 179 -38.531 -40.792 -80.056 1.00 0.00 D C  
ATOM 14689 OE1 GLU A 179 -37.458 -40.152 -80.220 1.00 0.00 D O  
ATOM 14690 OE2 GLU A 179 -38.826 -41.844 -80.681 1.00 0.00 D O  
ATOM 14691 C GLU A 179 -40.348 -40.636 -76.216 1.00 0.00 D C  
ATOM 14692 O GLU A 179 -41.537 -40.766 -76.501 1.00 0.00 D O  
ATOM 14693 N ILE A 180 -39.665 -41.575 -75.537 1.00 0.00 D N  
ATOM 14694 CA ILE A 180 -40.282 -42.807 -75.153 1.00 0.00 D C  
ATOM 14695 CB ILE A 180 -39.339 -43.771 -74.496 1.00 0.00 D C  
ATOM 14696 CG2 ILE A 180 -40.164 -44.948 -73.953 1.00 0.00 D C  
ATOM 14697 CG1 ILE A 180 -38.252 -44.199 -75.494 1.00 0.00 D C  
ATOM 14698 CD ILE A 180 -37.128 -45.014 -74.863 1.00 0.00 D C  
ATOM 14699 C ILE A 180 -41.385 -42.530 -74.184 1.00 0.00 D C  
ATOM 14700 O ILE A 180 -42.424 -43.187 -74.217 1.00 0.00 D O  
ATOM 14701 N ALA A 181 -41.164 -41.558 -73.283 1.00 0.00 D N  
ATOM 14702 CA ALA A 181 -42.090 -41.240 -72.240 1.00 0.00 D C  
ATOM 14703 CB ALA A 181 -41.581 -40.131 -71.301 1.00 0.00 D C  
ATOM 14704 C ALA A 181 -43.388 -40.771 -72.801 1.00 0.00 D C  
ATOM 14705 O ALA A 181 -44.419 -41.077 -72.220 1.00 0.00 D O  
ATOM 14706 N ARG A 182 -43.389 -39.969 -73.881 1.00 0.00 D N  
ATOM 14707 CA ARG A 182 -44.617 -39.468 -74.448 1.00 0.00 D C  
ATOM 14708 CB ARG A 182 -44.416 -38.286 -75.420 1.00 0.00 D C  
ATOM 14709 CG ARG A 182 -43.499 -38.583 -76.604 1.00 0.00 D C  
ATOM 14710 CD ARG A 182 -43.317 -37.402 -77.564 1.00 0.00 D C  
ATOM 14711 NE ARG A 182 -42.574 -36.319 -76.856 1.00 0.00 D N  
ATOM 14712 CZ ARG A 182 -43.235 -35.199 -76.440 1.00 0.00 D C  
ATOM 14713 NH1 ARG A 182 -44.568 -35.063 -76.694 1.00 0.00 D N  
ATOM 14714 NH2 ARG A 182 -42.564 -34.210 -75.782 1.00 0.00 D N  
ATOM 14715 C ARG A 182 -45.394 -40.551 -75.136 1.00 0.00 D C  
ATOM 14716 O ARG A 182 -46.624 -40.570 -75.086 1.00 0.00 D O  
ATOM 14717 N GLN A 183 -44.701 -41.492 -75.803 1.00 0.00 D N  
ATOM 14718 CA GLN A 183 -45.394 -42.521 -76.518 1.00 0.00 D C  
ATOM 14719 CB GLN A 183 -44.452 -43.433 -77.327 1.00 0.00 D C  
ATOM 14720 CG GLN A 183 -43.733 -42.640 -78.427 1.00 0.00 D C  
ATOM 14721 CD GLN A 183 -42.998 -43.590 -79.357 1.00 0.00 D C  
ATOM 14722 OE1 GLN A 183 -41.792 -43.464 -79.566 1.00 0.00 D O  
ATOM 14723 NE2 GLN A 183 -43.753 -44.548 -79.959 1.00 0.00 D N  
ATOM 14724 C GLN A 183 -46.180 -43.303 -75.513 1.00 0.00 D C



ATOM 14725 O GLN A 183 -47.248 -43.839 -75.815 1.00 0.00 D O  
ATOM 14726 N THR A 184 -45.614 -43.459 -74.306 1.00 0.00 D N  
ATOM 14727 CA THR A 184 -46.268 -44.045 -73.171 1.00 0.00 D C  
ATOM 14728 CB THR A 184 -45.295 -44.572 -72.165 1.00 0.00 D C  
ATOM 14729 OG1 THR A 184 -44.419 -45.503 -72.786 1.00 0.00 D O  
ATOM 14730 CG2 THR A 184 -46.087 -45.272 -71.047 1.00 0.00 D C  
ATOM 14731 C THR A 184 -47.145 -43.018 -72.508 1.00 0.00 D C  
ATOM 14732 O THR A 184 -48.049 -43.349 -71.746 1.00 0.00 D O  
ATOM 14733 N ASP A 185 -46.866 -41.724 -72.746 1.00 0.00 D N  
ATOM 14734 CA ASP A 185 -47.567 -40.632 -72.126 1.00 0.00 D C  
ATOM 14735 CB ASP A 185 -49.096 -40.750 -72.266 1.00 0.00 D C  
ATOM 14736 CG ASP A 185 -49.463 -40.502 -73.723 1.00 0.00 D C  
ATOM 14737 OD1 ASP A 185 -48.855 -39.586 -74.342 1.00 0.00 D O  
ATOM 14738 OD2 ASP A 185 -50.351 -41.230 -74.240 1.00 0.00 D O  
ATOM 14739 C ASP A 185 -47.243 -40.572 -70.664 1.00 0.00 D C  
ATOM 14740 O ASP A 185 -47.960 -39.949 -69.885 1.00 0.00 D O  
ATOM 14741 N SER A 186 -46.123 -41.200 -70.259 1.00 0.00 D N  
ATOM 14742 CA SER A 186 -45.595 -41.087 -68.929 1.00 0.00 D C  
ATOM 14743 CB SER A 186 -44.496 -42.120 -68.635 1.00 0.00 D C  
ATOM 14744 OG SER A 186 -45.033 -43.433 -68.708 1.00 0.00 D O  
ATOM 14745 C SER A 186 -44.938 -39.741 -68.868 1.00 0.00 D C  
ATOM 14746 O SER A 186 -44.394 -39.340 -67.839 1.00 0.00 D O  
ATOM 14747 N LEU A 187 -45.037 -38.984 -69.972 1.00 0.00 D N  
ATOM 14748 CA LEU A 187 -44.216 -37.831 -70.175 1.00 0.00 D C  
ATOM 14749 CB LEU A 187 -44.490 -37.102 -71.500 1.00 0.00 D C  
ATOM 14750 CG LEU A 187 -43.483 -35.961 -71.736 1.00 0.00 D C  
ATOM 14751 CD1 LEU A 187 -42.051 -36.507 -71.839 1.00 0.00 D C  
ATOM 14752 CD2 LEU A 187 -43.866 -35.096 -72.942 1.00 0.00 D C  
ATOM 14753 C LEU A 187 -44.281 -36.817 -69.068 1.00 0.00 D C  
ATOM 14754 O LEU A 187 -43.230 -36.387 -68.601 1.00 0.00 D O  
ATOM 14755 N LYS A 188 -45.470 -36.405 -68.593 1.00 0.00 D N  
ATOM 14756 CA LYS A 188 -45.481 -35.344 -67.613 1.00 0.00 D C  
ATOM 14757 CB LYS A 188 -46.897 -34.904 -67.213 1.00 0.00 D C  
ATOM 14758 CG LYS A 188 -46.883 -33.818 -66.137 1.00 0.00 D C  
ATOM 14759 CD LYS A 188 -48.236 -33.155 -65.886 1.00 0.00 D C  
ATOM 14760 CE LYS A 188 -48.427 -31.846 -66.648 1.00 0.00 D C  
ATOM 14761 NZ LYS A 188 -49.588 -31.117 -66.095 1.00 0.00 D N  
ATOM 14762 C LYS A 188 -44.792 -35.743 -66.339 1.00 0.00 D C

ATOM 14763 O LYS A 188 -43.907 -35.031 -65.860 1.00 0.00 D O  
ATOM 14764 N GLU A 189 -45.171 -36.903 -65.768 1.00 0.00 D N  
ATOM 14765 CA GLU A 189 -44.653 -37.330 -64.496 1.00 0.00 D C  
ATOM 14766 CB GLU A 189 -45.382 -38.554 -63.895 1.00 0.00 D C  
ATOM 14767 CG GLU A 189 -45.356 -39.823 -64.750 1.00 0.00 D C  
ATOM 14768 CD GLU A 189 -46.676 -39.915 -65.504 1.00 0.00 D C  
ATOM 14769 OE1 GLU A 189 -46.969 -38.987 -66.305 1.00 0.00 D O  
ATOM 14770 OE2 GLU A 189 -47.411 -40.912 -65.286 1.00 0.00 D O  
ATOM 14771 C GLU A 189 -43.203 -37.669 -64.620 1.00 0.00 D C  
ATOM 14772 O GLU A 189 -42.459 -37.579 -63.645 1.00 0.00 D O  
ATOM 14773 N LEU A 190 -42.774 -38.140 -65.808 1.00 0.00 D N  
ATOM 14774 CA LEU A 190 -41.401 -38.512 -65.991 1.00 0.00 D C  
ATOM 14775 CB LEU A 190 -41.142 -39.129 -67.374 1.00 0.00 D C  
ATOM 14776 CG LEU A 190 -39.669 -39.518 -67.595 1.00 0.00 D C  
ATOM 14777 CD1 LEU A 190 -39.224 -40.623 -66.627 1.00 0.00 D C  
ATOM 14778 CD2 LEU A 190 -39.403 -39.870 -69.066 1.00 0.00 D C  
ATOM 14779 C LEU A 190 -40.504 -37.317 -65.873 1.00 0.00 D C  
ATOM 14780 O LEU A 190 -39.534 -37.319 -65.116 1.00 0.00 D O  
ATOM 14781 N VAL A 191 -40.835 -36.246 -66.611 1.00 0.00 D N  
ATOM 14782 CA VAL A 191 -40.066 -35.037 -66.639 1.00 0.00 D C  
ATOM 14783 CB VAL A 191 -40.544 -34.070 -67.687 1.00 0.00 D C  
ATOM 14784 CG1 VAL A 191 -39.891 -32.702 -67.447 1.00 0.00 D C  
ATOM 14785 CG2 VAL A 191 -40.174 -34.644 -69.066 1.00 0.00 D C  
ATOM 14786 C VAL A 191 -40.114 -34.377 -65.291 1.00 0.00 D C  
ATOM 14787 O VAL A 191 -39.217 -33.604 -64.953 1.00 0.00 D O  
ATOM 14788 N ASN A 192 -41.178 -34.612 -64.497 1.00 0.00 D N  
ATOM 14789 CA ASN A 192 -41.236 -33.906 -63.245 1.00 0.00 D C  
ATOM 14790 CB ASN A 192 -42.600 -33.240 -63.002 1.00 0.00 D C  
ATOM 14791 CG ASN A 192 -42.781 -32.118 -64.013 1.00 0.00 D C  
ATOM 14792 OD1 ASN A 192 -41.830 -31.436 -64.394 1.00 0.00 D O  
ATOM 14793 ND2 ASN A 192 -44.049 -31.920 -64.464 1.00 0.00 D N  
ATOM 14794 C ASN A 192 -40.995 -34.787 -62.045 1.00 0.00 D C  
ATOM 14795 O ASN A 192 -41.456 -34.452 -60.954 1.00 0.00 D O  
ATOM 14796 N ALA A 193 -40.239 -35.895 -62.167 1.00 0.00 D N  
ATOM 14797 CA ALA A 193 -40.002 -36.704 -60.995 1.00 0.00 D C  
ATOM 14798 CB ALA A 193 -39.464 -38.109 -61.314 1.00 0.00 D C  
ATOM 14799 C ALA A 193 -38.972 -36.006 -60.154 1.00 0.00 D C  
ATOM 14800 O ALA A 193 -38.073 -35.360 -60.686 1.00 0.00 D O

|      |       |     |           |         |         |         |      |      |   |   |
|------|-------|-----|-----------|---------|---------|---------|------|------|---|---|
| ATOM | 14801 | N   | SER A 194 | -39.059 | -36.142 | -58.811 | 1.00 | 0.00 | D | N |
| ATOM | 14802 | CA  | SER A 194 | -38.149 | -35.423 | -57.958 | 1.00 | 0.00 | D | C |
| ATOM | 14803 | CB  | SER A 194 | -38.840 | -34.312 | -57.148 | 1.00 | 0.00 | D | C |
| ATOM | 14804 | OG  | SER A 194 | -39.854 | -34.861 | -56.318 | 1.00 | 0.00 | D | O |
| ATOM | 14805 | C   | SER A 194 | -37.466 | -36.347 | -56.988 | 1.00 | 0.00 | D | C |
| ATOM | 14806 | O   | SER A 194 | -37.901 | -37.473 | -56.752 | 1.00 | 0.00 | D | O |
| ATOM | 14807 | N   | TYR A 195 | -36.338 | -35.868 | -56.411 | 1.00 | 0.00 | D | N |
| ATOM | 14808 | CA  | TYR A 195 | -35.552 | -36.603 | -55.450 | 1.00 | 0.00 | D | C |
| ATOM | 14809 | CB  | TYR A 195 | -34.178 | -35.971 | -55.142 | 1.00 | 0.00 | D | C |
| ATOM | 14810 | CG  | TYR A 195 | -33.229 | -36.210 | -56.266 | 1.00 | 0.00 | D | C |
| ATOM | 14811 | CD1 | TYR A 195 | -33.248 | -35.444 | -57.408 | 1.00 | 0.00 | D | C |
| ATOM | 14812 | CE1 | TYR A 195 | -32.353 | -35.688 | -58.425 | 1.00 | 0.00 | D | C |
| ATOM | 14813 | CZ  | TYR A 195 | -31.426 | -36.695 | -58.305 | 1.00 | 0.00 | D | C |
| ATOM | 14814 | OH  | TYR A 195 | -30.507 | -36.948 | -59.346 | 1.00 | 0.00 | D | O |
| ATOM | 14815 | CD2 | TYR A 195 | -32.290 | -37.212 | -56.153 | 1.00 | 0.00 | D | C |
| ATOM | 14816 | CE2 | TYR A 195 | -31.395 | -37.458 | -57.165 | 1.00 | 0.00 | D | C |
| ATOM | 14817 | C   | TYR A 195 | -36.288 | -36.652 | -54.139 | 1.00 | 0.00 | D | C |
| ATOM | 14818 | O   | TYR A 195 | -36.889 | -35.672 | -53.714 | 1.00 | 0.00 | D | O |
| ATOM | 14819 | N   | THR A 196 | -36.358 | -37.857 | -53.545 | 1.00 | 0.00 | D | N |
| ATOM | 14820 | CA  | THR A 196 | -36.960 | -38.170 | -52.271 | 1.00 | 0.00 | D | C |
| ATOM | 14821 | CB  | THR A 196 | -37.502 | -39.566 | -52.250 | 1.00 | 0.00 | D | C |
| ATOM | 14822 | OG1 | THR A 196 | -36.449 | -40.507 | -52.401 | 1.00 | 0.00 | D | O |
| ATOM | 14823 | CG2 | THR A 196 | -38.498 | -39.709 | -53.412 | 1.00 | 0.00 | D | C |
| ATOM | 14824 | C   | THR A 196 | -36.060 | -38.009 | -51.070 | 1.00 | 0.00 | D | C |
| ATOM | 14825 | O   | THR A 196 | -36.549 | -37.764 | -49.969 | 1.00 | 0.00 | D | O |
| ATOM | 14826 | N   | ASP A 197 | -34.731 | -38.198 | -51.224 | 1.00 | 0.00 | D | N |
| ATOM | 14827 | CA  | ASP A 197 | -33.851 | -38.211 | -50.084 | 1.00 | 0.00 | D | C |
| ATOM | 14828 | CB  | ASP A 197 | -32.409 | -38.638 | -50.415 | 1.00 | 0.00 | D | C |
| ATOM | 14829 | CG  | ASP A 197 | -31.813 | -37.629 | -51.386 | 1.00 | 0.00 | D | C |
| ATOM | 14830 | OD1 | ASP A 197 | -32.575 | -37.102 | -52.240 | 1.00 | 0.00 | D | O |
| ATOM | 14831 | OD2 | ASP A 197 | -30.585 | -37.370 | -51.281 | 1.00 | 0.00 | D | O |
| ATOM | 14832 | C   | ASP A 197 | -33.810 | -36.845 | -49.477 | 1.00 | 0.00 | D | C |
| ATOM | 14833 | O   | ASP A 197 | -34.130 | -35.850 | -50.119 | 1.00 | 0.00 | D | O |
| ATOM | 14834 | N   | SER A 198 | -33.410 | -36.768 | -48.193 | 1.00 | 0.00 | D | N |
| ATOM | 14835 | CA  | SER A 198 | -33.433 | -35.517 | -47.494 | 1.00 | 0.00 | D | C |
| ATOM | 14836 | CB  | SER A 198 | -33.032 | -35.645 | -46.014 | 1.00 | 0.00 | D | C |
| ATOM | 14837 | OG  | SER A 198 | -31.679 | -36.053 | -45.902 | 1.00 | 0.00 | D | O |
| ATOM | 14838 | C   | SER A 198 | -32.486 | -34.547 | -48.129 | 1.00 | 0.00 | D | C |

ATOM 14839 O SER A 198 -32.701 -33.336 -48.071 1.00 0.00 D O  
ATOM 14840 N TYR A 199 -31.383 -35.038 -48.721 1.00 0.00 D N  
ATOM 14841 CA TYR A 199 -30.417 -34.103 -49.229 1.00 0.00 D C  
ATOM 14842 CB TYR A 199 -29.130 -34.849 -49.636 1.00 0.00 D C  
ATOM 14843 CG TYR A 199 -28.013 -33.896 -49.886 1.00 0.00 D C  
ATOM 14844 CD1 TYR A 199 -27.456 -33.204 -48.836 1.00 0.00 D C  
ATOM 14845 CE1 TYR A 199 -26.416 -32.331 -49.043 1.00 0.00 D C  
ATOM 14846 CZ TYR A 199 -25.909 -32.149 -50.305 1.00 0.00 D C  
ATOM 14847 OH TYR A 199 -24.840 -31.254 -50.505 1.00 0.00 D O  
ATOM 14848 CD2 TYR A 199 -27.489 -33.723 -51.147 1.00 0.00 D C  
ATOM 14849 CE2 TYR A 199 -26.444 -32.851 -51.362 1.00 0.00 D C  
ATOM 14850 C TYR A 199 -30.922 -33.319 -50.425 1.00 0.00 D C  
ATOM 14851 O TYR A 199 -31.063 -32.097 -50.368 1.00 0.00 D O  
ATOM 14852 N TYR A 200 -31.228 -34.027 -51.529 1.00 0.00 D N  
ATOM 14853 CA TYR A 200 -31.644 -33.516 -52.817 1.00 0.00 D C  
ATOM 14854 CB TYR A 200 -31.214 -34.382 -54.012 1.00 0.00 D C  
ATOM 14855 CG TYR A 200 -29.958 -35.053 -53.571 1.00 0.00 D C  
ATOM 14856 CD1 TYR A 200 -28.808 -34.315 -53.408 1.00 0.00 D C  
ATOM 14857 CE1 TYR A 200 -27.639 -34.912 -52.998 1.00 0.00 D C  
ATOM 14858 CZ TYR A 200 -27.612 -36.263 -52.755 1.00 0.00 D C  
ATOM 14859 OH TYR A 200 -26.418 -36.884 -52.334 1.00 0.00 D O  
ATOM 14860 CD2 TYR A 200 -29.921 -36.407 -53.334 1.00 0.00 D C  
ATOM 14861 CE2 TYR A 200 -28.755 -37.011 -52.925 1.00 0.00 D C  
ATOM 14862 C TYR A 200 -33.096 -33.189 -52.944 1.00 0.00 D C  
ATOM 14863 O TYR A 200 -33.497 -32.606 -53.954 1.00 0.00 D O  
ATOM 14864 N LYS A 201 -33.922 -33.669 -51.992 1.00 0.00 D N  
ATOM 14865 CA LYS A 201 -35.360 -33.697 -52.075 1.00 0.00 D C  
ATOM 14866 CB LYS A 201 -36.079 -33.847 -50.719 1.00 0.00 D C  
ATOM 14867 CG LYS A 201 -35.841 -32.702 -49.737 1.00 0.00 D C  
ATOM 14868 CD LYS A 201 -36.831 -32.692 -48.572 1.00 0.00 D C  
ATOM 14869 CE LYS A 201 -37.366 -34.077 -48.210 1.00 0.00 D C  
ATOM 14870 NZ LYS A 201 -36.284 -34.909 -47.635 1.00 0.00 D N  
ATOM 14871 C LYS A 201 -35.973 -32.561 -52.838 1.00 0.00 D C  
ATOM 14872 O LYS A 201 -35.667 -31.387 -52.644 1.00 0.00 D O  
ATOM 14873 N GLY A 202 -36.840 -32.947 -53.795 1.00 0.00 D N  
ATOM 14874 CA GLY A 202 -37.614 -32.035 -54.581 1.00 0.00 D C  
ATOM 14875 C GLY A 202 -36.862 -31.589 -55.800 1.00 0.00 D C  
ATOM 14876 O GLY A 202 -37.393 -30.809 -56.591 1.00 0.00 D O

|      |       |     |     |   |     |         |         |         |      |      |   |   |
|------|-------|-----|-----|---|-----|---------|---------|---------|------|------|---|---|
| ATOM | 14877 | N   | GLN | A | 203 | -35.614 | -32.058 | -55.999 | 1.00 | 0.00 | D | N |
| ATOM | 14878 | CA  | GLN | A | 203 | -34.895 | -31.638 | -57.171 | 1.00 | 0.00 | D | C |
| ATOM | 14879 | CB  | GLN | A | 203 | -33.370 | -31.846 | -57.085 | 1.00 | 0.00 | D | C |
| ATOM | 14880 | CG  | GLN | A | 203 | -32.619 | -31.379 | -58.338 | 1.00 | 0.00 | D | C |
| ATOM | 14881 | CD  | GLN | A | 203 | -31.126 | -31.552 | -58.096 | 1.00 | 0.00 | D | C |
| ATOM | 14882 | OE1 | GLN | A | 203 | -30.655 | -32.637 | -57.752 | 1.00 | 0.00 | D | O |
| ATOM | 14883 | NE2 | GLN | A | 203 | -30.354 | -30.448 | -58.277 | 1.00 | 0.00 | D | N |
| ATOM | 14884 | C   | GLN | A | 203 | -35.408 | -32.395 | -58.356 | 1.00 | 0.00 | D | C |
| ATOM | 14885 | O   | GLN | A | 203 | -35.637 | -33.605 | -58.297 | 1.00 | 0.00 | D | O |
| ATOM | 14886 | N   | THR | A | 204 | -35.588 | -31.668 | -59.478 | 1.00 | 0.00 | D | N |
| ATOM | 14887 | CA  | THR | A | 204 | -36.087 | -32.196 | -60.715 | 1.00 | 0.00 | D | C |
| ATOM | 14888 | CB  | THR | A | 204 | -37.308 | -31.482 | -61.215 | 1.00 | 0.00 | D | C |
| ATOM | 14889 | OG1 | THR | A | 204 | -37.001 | -30.117 | -61.459 | 1.00 | 0.00 | D | O |
| ATOM | 14890 | CG2 | THR | A | 204 | -38.423 | -31.592 | -60.161 | 1.00 | 0.00 | D | C |
| ATOM | 14891 | C   | THR | A | 204 | -35.025 | -31.973 | -61.743 | 1.00 | 0.00 | D | C |
| ATOM | 14892 | O   | THR | A | 204 | -34.023 | -31.310 | -61.485 | 1.00 | 0.00 | D | O |
| ATOM | 14893 | N   | ALA | A | 205 | -35.225 | -32.533 | -62.953 | 1.00 | 0.00 | D | N |
| ATOM | 14894 | CA  | ALA | A | 205 | -34.267 | -32.408 | -64.014 | 1.00 | 0.00 | D | C |
| ATOM | 14895 | CB  | ALA | A | 205 | -34.707 | -33.129 | -65.299 | 1.00 | 0.00 | D | C |
| ATOM | 14896 | C   | ALA | A | 205 | -34.083 | -30.957 | -64.350 | 1.00 | 0.00 | D | C |
| ATOM | 14897 | O   | ALA | A | 205 | -32.967 | -30.511 | -64.606 | 1.00 | 0.00 | D | O |
| ATOM | 14898 | N   | LEU | A | 206 | -35.170 | -30.163 | -64.340 | 1.00 | 0.00 | D | N |
| ATOM | 14899 | CA  | LEU | A | 206 | -35.069 | -28.777 | -64.706 | 1.00 | 0.00 | D | C |
| ATOM | 14900 | CB  | LEU | A | 206 | -36.425 | -28.045 | -64.687 | 1.00 | 0.00 | D | C |
| ATOM | 14901 | CG  | LEU | A | 206 | -36.332 | -26.576 | -65.141 | 1.00 | 0.00 | D | C |
| ATOM | 14902 | CD1 | LEU | A | 206 | -35.769 | -26.481 | -66.567 | 1.00 | 0.00 | D | C |
| ATOM | 14903 | CD2 | LEU | A | 206 | -37.684 | -25.857 | -65.007 | 1.00 | 0.00 | D | C |
| ATOM | 14904 | C   | LEU | A | 206 | -34.132 | -28.073 | -63.768 | 1.00 | 0.00 | D | C |
| ATOM | 14905 | O   | LEU | A | 206 | -33.400 | -27.173 | -64.178 | 1.00 | 0.00 | D | O |
| ATOM | 14906 | N   | HSD | A | 207 | -34.123 | -28.454 | -62.478 | 1.00 | 0.00 | D | N |
| ATOM | 14907 | CA  | HSD | A | 207 | -33.241 | -27.783 | -61.562 | 1.00 | 0.00 | D | C |
| ATOM | 14908 | CB  | HSD | A | 207 | -33.300 | -28.338 | -60.126 | 1.00 | 0.00 | D | C |
| ATOM | 14909 | ND1 | HSD | A | 207 | -35.678 | -28.869 | -59.396 | 1.00 | 0.00 | D | N |
| ATOM | 14910 | CG  | HSD | A | 207 | -34.577 | -28.041 | -59.404 | 1.00 | 0.00 | D | C |
| ATOM | 14911 | CE1 | HSD | A | 207 | -36.619 | -28.266 | -58.626 | 1.00 | 0.00 | D | C |
| ATOM | 14912 | NE2 | HSD | A | 207 | -36.200 | -27.111 | -58.141 | 1.00 | 0.00 | D | N |
| ATOM | 14913 | CD2 | HSD | A | 207 | -34.915 | -26.971 | -58.632 | 1.00 | 0.00 | D | C |
| ATOM | 14914 | C   | HSD | A | 207 | -31.832 | -27.988 | -62.030 | 1.00 | 0.00 | D | C |

ATOM 14915 O HSD A 207 -31.044 -27.047 -62.097 1.00 0.00 D O  
ATOM 14916 N ILE A 208 -31.492 -29.237 -62.403 1.00 0.00 D N  
ATOM 14917 CA ILE A 208 -30.158 -29.603 -62.778 1.00 0.00 D C  
ATOM 14918 CB ILE A 208 -30.029 -31.074 -63.067 1.00 0.00 D C  
ATOM 14919 CG2 ILE A 208 -28.645 -31.332 -63.684 1.00 0.00 D C  
ATOM 14920 CG1 ILE A 208 -30.302 -31.894 -61.791 1.00 0.00 D C  
ATOM 14921 CD ILE A 208 -30.455 -33.395 -62.041 1.00 0.00 D C  
ATOM 14922 C ILE A 208 -29.716 -28.847 -63.997 1.00 0.00 D C  
ATOM 14923 O ILE A 208 -28.570 -28.401 -64.067 1.00 0.00 D O  
ATOM 14924 N ALA A 209 -30.608 -28.678 -64.989 1.00 0.00 D N  
ATOM 14925 CA ALA A 209 -30.246 -28.028 -66.220 1.00 0.00 D C  
ATOM 14926 CB ALA A 209 -31.415 -27.953 -67.216 1.00 0.00 D C  
ATOM 14927 C ALA A 209 -29.812 -26.629 -65.929 1.00 0.00 D C  
ATOM 14928 O ALA A 209 -28.875 -26.124 -66.546 1.00 0.00 D O  
ATOM 14929 N ILE A 210 -30.523 -25.953 -65.013 1.00 0.00 D N  
ATOM 14930 CA ILE A 210 -30.196 -24.602 -64.653 1.00 0.00 D C  
ATOM 14931 CB ILE A 210 -31.251 -23.966 -63.796 1.00 0.00 D C  
ATOM 14932 CG2 ILE A 210 -30.750 -22.580 -63.353 1.00 0.00 D C  
ATOM 14933 CG1 ILE A 210 -32.583 -23.916 -64.560 1.00 0.00 D C  
ATOM 14934 CD ILE A 210 -33.773 -23.546 -63.682 1.00 0.00 D C  
ATOM 14935 C ILE A 210 -28.901 -24.572 -63.905 1.00 0.00 D C  
ATOM 14936 O ILE A 210 -28.030 -23.752 -64.185 1.00 0.00 D O  
ATOM 14937 N GLU A 211 -28.724 -25.501 -62.949 1.00 0.00 D N  
ATOM 14938 CA GLU A 211 -27.533 -25.518 -62.151 1.00 0.00 D C  
ATOM 14939 CB GLU A 211 -27.543 -26.675 -61.141 1.00 0.00 D C  
ATOM 14940 CG GLU A 211 -28.565 -26.425 -60.028 1.00 0.00 D C  
ATOM 14941 CD GLU A 211 -28.817 -27.714 -59.266 1.00 0.00 D C  
ATOM 14942 OE1 GLU A 211 -28.600 -28.806 -59.856 1.00 0.00 D O  
ATOM 14943 OE2 GLU A 211 -29.246 -27.626 -58.085 1.00 0.00 D O  
ATOM 14944 C GLU A 211 -26.372 -25.645 -63.090 1.00 0.00 D C  
ATOM 14945 O GLU A 211 -25.302 -25.087 -62.859 1.00 0.00 D O  
ATOM 14946 N ARG A 212 -26.576 -26.403 -64.177 1.00 0.00 D N  
ATOM 14947 CA ARG A 212 -25.624 -26.646 -65.222 1.00 0.00 D C  
ATOM 14948 CB ARG A 212 -26.036 -27.829 -66.116 1.00 0.00 D C  
ATOM 14949 CG ARG A 212 -26.093 -29.145 -65.337 1.00 0.00 D C  
ATOM 14950 CD ARG A 212 -24.868 -29.362 -64.445 1.00 0.00 D C  
ATOM 14951 NE ARG A 212 -25.007 -30.690 -63.786 1.00 0.00 D N  
ATOM 14952 CZ ARG A 212 -24.839 -30.803 -62.438 1.00 0.00 D C

|      |       |     |     |   |     |         |         |         |      |      |   |   |
|------|-------|-----|-----|---|-----|---------|---------|---------|------|------|---|---|
| ATOM | 14953 | NH1 | ARG | A | 212 | -24.604 | -29.687 | -61.685 | 1.00 | 0.00 | D | N |
| ATOM | 14954 | NH2 | ARG | A | 212 | -24.905 | -32.029 | -61.842 | 1.00 | 0.00 | D | N |
| ATOM | 14955 | C   | ARG | A | 212 | -25.427 | -25.434 | -66.085 | 1.00 | 0.00 | D | C |
| ATOM | 14956 | O   | ARG | A | 212 | -24.423 | -25.336 | -66.789 | 1.00 | 0.00 | D | O |
| ATOM | 14957 | N   | ARG | A | 213 | -26.394 | -24.494 | -66.093 | 1.00 | 0.00 | D | N |
| ATOM | 14958 | CA  | ARG | A | 213 | -26.309 | -23.329 | -66.930 | 1.00 | 0.00 | D | C |
| ATOM | 14959 | CB  | ARG | A | 213 | -24.972 | -22.587 | -66.804 | 1.00 | 0.00 | D | C |
| ATOM | 14960 | CG  | ARG | A | 213 | -24.732 | -22.003 | -65.418 | 1.00 | 0.00 | D | C |
| ATOM | 14961 | CD  | ARG | A | 213 | -23.410 | -21.248 | -65.297 | 1.00 | 0.00 | D | C |
| ATOM | 14962 | NE  | ARG | A | 213 | -23.360 | -20.702 | -63.916 | 1.00 | 0.00 | D | N |
| ATOM | 14963 | CZ  | ARG | A | 213 | -23.931 | -19.496 | -63.632 | 1.00 | 0.00 | D | C |
| ATOM | 14964 | NH1 | ARG | A | 213 | -24.498 | -18.743 | -64.620 | 1.00 | 0.00 | D | N |
| ATOM | 14965 | NH2 | ARG | A | 213 | -23.943 | -19.054 | -62.345 | 1.00 | 0.00 | D | N |
| ATOM | 14966 | C   | ARG | A | 213 | -26.432 | -23.738 | -68.363 | 1.00 | 0.00 | D | C |
| ATOM | 14967 | O   | ARG | A | 213 | -25.722 | -23.213 | -69.221 | 1.00 | 0.00 | D | O |
| ATOM | 14968 | N   | ASN | A | 214 | -27.327 | -24.701 | -68.672 | 1.00 | 0.00 | D | N |
| ATOM | 14969 | CA  | ASN | A | 214 | -27.465 | -25.027 | -70.062 | 1.00 | 0.00 | D | C |
| ATOM | 14970 | CB  | ASN | A | 214 | -27.066 | -26.470 | -70.460 | 1.00 | 0.00 | D | C |
| ATOM | 14971 | CG  | ASN | A | 214 | -27.900 | -27.542 | -69.778 | 1.00 | 0.00 | D | C |
| ATOM | 14972 | OD1 | ASN | A | 214 | -28.881 | -27.299 | -69.079 | 1.00 | 0.00 | D | O |
| ATOM | 14973 | ND2 | ASN | A | 214 | -27.465 | -28.814 | -69.984 | 1.00 | 0.00 | D | N |
| ATOM | 14974 | C   | ASN | A | 214 | -28.836 | -24.669 | -70.547 | 1.00 | 0.00 | D | C |
| ATOM | 14975 | O   | ASN | A | 214 | -29.854 | -25.255 | -70.182 | 1.00 | 0.00 | D | O |
| ATOM | 14976 | N   | MET | A | 215 | -28.879 | -23.654 | -71.424 | 1.00 | 0.00 | D | N |
| ATOM | 14977 | CA  | MET | A | 215 | -30.115 | -23.128 | -71.920 | 1.00 | 0.00 | D | C |
| ATOM | 14978 | CB  | MET | A | 215 | -29.882 | -21.918 | -72.840 | 1.00 | 0.00 | D | C |
| ATOM | 14979 | CG  | MET | A | 215 | -30.947 | -20.818 | -72.743 | 1.00 | 0.00 | D | C |
| ATOM | 14980 | SD  | MET | A | 215 | -32.655 | -21.292 | -73.125 | 1.00 | 0.00 | D | S |
| ATOM | 14981 | CE  | MET | A | 215 | -33.000 | -22.103 | -71.539 | 1.00 | 0.00 | D | C |
| ATOM | 14982 | C   | MET | A | 215 | -30.794 | -24.206 | -72.707 | 1.00 | 0.00 | D | C |
| ATOM | 14983 | O   | MET | A | 215 | -31.995 | -24.433 | -72.569 | 1.00 | 0.00 | D | O |
| ATOM | 14984 | N   | ALA | A | 216 | -30.017 | -24.951 | -73.511 | 1.00 | 0.00 | D | N |
| ATOM | 14985 | CA  | ALA | A | 216 | -30.610 | -25.910 | -74.394 | 1.00 | 0.00 | D | C |
| ATOM | 14986 | CB  | ALA | A | 216 | -29.561 | -26.701 | -75.183 | 1.00 | 0.00 | D | C |
| ATOM | 14987 | C   | ALA | A | 216 | -31.408 | -26.901 | -73.604 | 1.00 | 0.00 | D | C |
| ATOM | 14988 | O   | ALA | A | 216 | -32.524 | -27.238 | -73.993 | 1.00 | 0.00 | D | O |
| ATOM | 14989 | N   | LEU | A | 217 | -30.860 | -27.401 | -72.481 | 1.00 | 0.00 | D | N |
| ATOM | 14990 | CA  | LEU | A | 217 | -31.592 | -28.356 | -71.698 | 1.00 | 0.00 | D | C |

|      |       |     |     |   |     |         |         |         |      |      |   |   |
|------|-------|-----|-----|---|-----|---------|---------|---------|------|------|---|---|
| ATOM | 14991 | CB  | LEU | A | 217 | -30.773 | -29.109 | -70.635 | 1.00 | 0.00 | D | C |
| ATOM | 14992 | CG  | LEU | A | 217 | -29.773 | -30.120 | -71.228 | 1.00 | 0.00 | D | C |
| ATOM | 14993 | CD1 | LEU | A | 217 | -29.231 | -31.067 | -70.144 | 1.00 | 0.00 | D | C |
| ATOM | 14994 | CD2 | LEU | A | 217 | -30.378 | -30.868 | -72.427 | 1.00 | 0.00 | D | C |
| ATOM | 14995 | C   | LEU | A | 217 | -32.750 | -27.711 | -71.013 | 1.00 | 0.00 | D | C |
| ATOM | 14996 | O   | LEU | A | 217 | -33.792 | -28.337 | -70.833 | 1.00 | 0.00 | D | O |
| ATOM | 14997 | N   | VAL | A | 218 | -32.596 | -26.452 | -70.560 | 1.00 | 0.00 | D | N |
| ATOM | 14998 | CA  | VAL | A | 218 | -33.712 | -25.821 | -69.919 | 1.00 | 0.00 | D | C |
| ATOM | 14999 | CB  | VAL | A | 218 | -33.413 | -24.415 | -69.479 | 1.00 | 0.00 | D | C |
| ATOM | 15000 | CG1 | VAL | A | 218 | -34.719 | -23.759 | -68.999 | 1.00 | 0.00 | D | C |
| ATOM | 15001 | CG2 | VAL | A | 218 | -32.312 | -24.464 | -68.407 | 1.00 | 0.00 | D | C |
| ATOM | 15002 | C   | VAL | A | 218 | -34.811 | -25.753 | -70.931 | 1.00 | 0.00 | D | C |
| ATOM | 15003 | O   | VAL | A | 218 | -35.940 | -26.169 | -70.675 | 1.00 | 0.00 | D | O |
| ATOM | 15004 | N   | THR | A | 219 | -34.476 | -25.295 | -72.150 | 1.00 | 0.00 | D | N |
| ATOM | 15005 | CA  | THR | A | 219 | -35.460 | -25.110 | -73.176 | 1.00 | 0.00 | D | C |
| ATOM | 15006 | CB  | THR | A | 219 | -34.854 | -24.699 | -74.486 | 1.00 | 0.00 | D | C |
| ATOM | 15007 | OG1 | THR | A | 219 | -34.090 | -23.514 | -74.325 | 1.00 | 0.00 | D | O |
| ATOM | 15008 | CG2 | THR | A | 219 | -35.985 | -24.459 | -75.501 | 1.00 | 0.00 | D | C |
| ATOM | 15009 | C   | THR | A | 219 | -36.137 | -26.417 | -73.427 | 1.00 | 0.00 | D | C |
| ATOM | 15010 | O   | THR | A | 219 | -37.362 | -26.486 | -73.503 | 1.00 | 0.00 | D | O |
| ATOM | 15011 | N   | LEU | A | 220 | -35.355 | -27.503 | -73.544 | 1.00 | 0.00 | D | N |
| ATOM | 15012 | CA  | LEU | A | 220 | -35.944 | -28.760 | -73.904 | 1.00 | 0.00 | D | C |
| ATOM | 15013 | CB  | LEU | A | 220 | -34.900 | -29.873 | -74.097 | 1.00 | 0.00 | D | C |
| ATOM | 15014 | CG  | LEU | A | 220 | -35.506 | -31.226 | -74.517 | 1.00 | 0.00 | D | C |
| ATOM | 15015 | CD1 | LEU | A | 220 | -36.208 | -31.122 | -75.881 | 1.00 | 0.00 | D | C |
| ATOM | 15016 | CD2 | LEU | A | 220 | -34.451 | -32.345 | -74.483 | 1.00 | 0.00 | D | C |
| ATOM | 15017 | C   | LEU | A | 220 | -36.910 | -29.204 | -72.846 | 1.00 | 0.00 | D | C |
| ATOM | 15018 | O   | LEU | A | 220 | -38.030 | -29.596 | -73.161 | 1.00 | 0.00 | D | O |
| ATOM | 15019 | N   | LEU | A | 221 | -36.522 | -29.123 | -71.556 | 1.00 | 0.00 | D | N |
| ATOM | 15020 | CA  | LEU | A | 221 | -37.364 | -29.628 | -70.503 | 1.00 | 0.00 | D | C |
| ATOM | 15021 | CB  | LEU | A | 221 | -36.706 | -29.602 | -69.115 | 1.00 | 0.00 | D | C |
| ATOM | 15022 | CG  | LEU | A | 221 | -35.713 | -30.759 | -68.890 | 1.00 | 0.00 | D | C |
| ATOM | 15023 | CD1 | LEU | A | 221 | -34.629 | -30.814 | -69.974 | 1.00 | 0.00 | D | C |
| ATOM | 15024 | CD2 | LEU | A | 221 | -35.125 | -30.705 | -67.474 | 1.00 | 0.00 | D | C |
| ATOM | 15025 | C   | LEU | A | 221 | -38.658 | -28.880 | -70.429 | 1.00 | 0.00 | D | C |
| ATOM | 15026 | O   | LEU | A | 221 | -39.710 | -29.485 | -70.233 | 1.00 | 0.00 | D | O |
| ATOM | 15027 | N   | VAL | A | 222 | -38.616 | -27.545 | -70.586 | 1.00 | 0.00 | D | N |
| ATOM | 15028 | CA  | VAL | A | 222 | -39.796 | -26.728 | -70.510 | 1.00 | 0.00 | D | C |



|      |       |     |           |         |         |         |      |      |   |   |
|------|-------|-----|-----------|---------|---------|---------|------|------|---|---|
| ATOM | 15029 | CB  | VAL A 222 | -39.491 | -25.265 | -70.656 | 1.00 | 0.00 | D | C |
| ATOM | 15030 | CG1 | VAL A 222 | -40.816 | -24.491 | -70.749 | 1.00 | 0.00 | D | C |
| ATOM | 15031 | CG2 | VAL A 222 | -38.607 | -24.832 | -69.474 | 1.00 | 0.00 | D | C |
| ATOM | 15032 | C   | VAL A 222 | -40.754 | -27.106 | -71.604 | 1.00 | 0.00 | D | C |
| ATOM | 15033 | O   | VAL A 222 | -41.966 | -27.109 | -71.400 | 1.00 | 0.00 | D | O |
| ATOM | 15034 | N   | GLU A 223 | -40.235 | -27.401 | -72.813 | 1.00 | 0.00 | D | N |
| ATOM | 15035 | CA  | GLU A 223 | -41.076 | -27.762 | -73.924 | 1.00 | 0.00 | D | C |
| ATOM | 15036 | CB  | GLU A 223 | -40.318 | -27.853 | -75.260 | 1.00 | 0.00 | D | C |
| ATOM | 15037 | CG  | GLU A 223 | -39.868 | -26.481 | -75.765 | 1.00 | 0.00 | D | C |
| ATOM | 15038 | CD  | GLU A 223 | -39.305 | -26.637 | -77.168 | 1.00 | 0.00 | D | C |
| ATOM | 15039 | OE1 | GLU A 223 | -38.944 | -27.783 | -77.544 | 1.00 | 0.00 | D | O |
| ATOM | 15040 | OE2 | GLU A 223 | -39.232 | -25.605 | -77.887 | 1.00 | 0.00 | D | O |
| ATOM | 15041 | C   | GLU A 223 | -41.730 | -29.081 | -73.650 | 1.00 | 0.00 | D | C |
| ATOM | 15042 | O   | GLU A 223 | -42.860 | -29.328 | -74.067 | 1.00 | 0.00 | D | O |
| ATOM | 15043 | N   | ASN A 224 | -40.995 | -29.975 | -72.970 | 1.00 | 0.00 | D | N |
| ATOM | 15044 | CA  | ASN A 224 | -41.413 | -31.286 | -72.557 | 1.00 | 0.00 | D | C |
| ATOM | 15045 | CB  | ASN A 224 | -40.260 | -32.143 | -72.024 | 1.00 | 0.00 | D | C |
| ATOM | 15046 | CG  | ASN A 224 | -39.307 | -32.365 | -73.181 | 1.00 | 0.00 | D | C |
| ATOM | 15047 | OD1 | ASN A 224 | -39.715 | -32.628 | -74.311 | 1.00 | 0.00 | D | O |
| ATOM | 15048 | ND2 | ASN A 224 | -37.988 | -32.236 | -72.890 | 1.00 | 0.00 | D | N |
| ATOM | 15049 | C   | ASN A 224 | -42.399 | -31.148 | -71.438 | 1.00 | 0.00 | D | C |
| ATOM | 15050 | O   | ASN A 224 | -43.006 | -32.134 | -71.022 | 1.00 | 0.00 | D | O |
| ATOM | 15051 | N   | GLY A 225 | -42.515 | -29.944 | -70.839 | 1.00 | 0.00 | D | N |
| ATOM | 15052 | CA  | GLY A 225 | -43.528 | -29.792 | -69.834 | 1.00 | 0.00 | D | C |
| ATOM | 15053 | C   | GLY A 225 | -42.977 | -29.862 | -68.443 | 1.00 | 0.00 | D | C |
| ATOM | 15054 | O   | GLY A 225 | -43.699 | -30.229 | -67.518 | 1.00 | 0.00 | D | O |
| ATOM | 15055 | N   | ALA A 226 | -41.687 | -29.525 | -68.244 | 1.00 | 0.00 | D | N |
| ATOM | 15056 | CA  | ALA A 226 | -41.172 | -29.529 | -66.904 | 1.00 | 0.00 | D | C |
| ATOM | 15057 | CB  | ALA A 226 | -39.665 | -29.231 | -66.816 | 1.00 | 0.00 | D | C |
| ATOM | 15058 | C   | ALA A 226 | -41.894 | -28.476 | -66.112 | 1.00 | 0.00 | D | C |
| ATOM | 15059 | O   | ALA A 226 | -42.201 | -27.395 | -66.617 | 1.00 | 0.00 | D | O |
| ATOM | 15060 | N   | ASP A 227 | -42.209 | -28.799 | -64.838 | 1.00 | 0.00 | D | N |
| ATOM | 15061 | CA  | ASP A 227 | -42.880 | -27.896 | -63.947 | 1.00 | 0.00 | D | C |
| ATOM | 15062 | CB  | ASP A 227 | -43.360 | -28.578 | -62.656 | 1.00 | 0.00 | D | C |
| ATOM | 15063 | CG  | ASP A 227 | -44.164 | -27.578 | -61.843 | 1.00 | 0.00 | D | C |
| ATOM | 15064 | OD1 | ASP A 227 | -44.442 | -26.466 | -62.369 | 1.00 | 0.00 | D | O |
| ATOM | 15065 | OD2 | ASP A 227 | -44.511 | -27.911 | -60.677 | 1.00 | 0.00 | D | O |
| ATOM | 15066 | C   | ASP A 227 | -41.903 | -26.830 | -63.554 | 1.00 | 0.00 | D | C |

|      |       |     |           |         |         |         |      |      |   |   |
|------|-------|-----|-----------|---------|---------|---------|------|------|---|---|
| ATOM | 15067 | O   | ASP A 227 | -40.873 | -27.103 | -62.939 | 1.00 | 0.00 | D | O |
| ATOM | 15068 | N   | VAL A 228 | -42.227 | -25.576 | -63.908 | 1.00 | 0.00 | D | N |
| ATOM | 15069 | CA  | VAL A 228 | -41.411 | -24.422 | -63.653 | 1.00 | 0.00 | D | C |
| ATOM | 15070 | CB  | VAL A 228 | -41.853 | -23.227 | -64.448 | 1.00 | 0.00 | D | C |
| ATOM | 15071 | CG1 | VAL A 228 | -41.045 | -21.998 | -63.997 | 1.00 | 0.00 | D | C |
| ATOM | 15072 | CG2 | VAL A 228 | -41.683 | -23.552 | -65.943 | 1.00 | 0.00 | D | C |
| ATOM | 15073 | C   | VAL A 228 | -41.412 | -24.053 | -62.193 | 1.00 | 0.00 | D | C |
| ATOM | 15074 | O   | VAL A 228 | -40.486 | -23.404 | -61.709 | 1.00 | 0.00 | D | O |
| ATOM | 15075 | N   | GLN A 229 | -42.520 | -24.355 | -61.496 | 1.00 | 0.00 | D | N |
| ATOM | 15076 | CA  | GLN A 229 | -42.761 | -24.076 | -60.102 | 1.00 | 0.00 | D | C |
| ATOM | 15077 | CB  | GLN A 229 | -44.253 | -23.968 | -59.756 | 1.00 | 0.00 | D | C |
| ATOM | 15078 | CG  | GLN A 229 | -44.895 | -22.745 | -60.413 | 1.00 | 0.00 | D | C |
| ATOM | 15079 | CD  | GLN A 229 | -44.032 | -21.539 | -60.059 | 1.00 | 0.00 | D | C |
| ATOM | 15080 | OE1 | GLN A 229 | -43.067 | -21.224 | -60.751 | 1.00 | 0.00 | D | O |
| ATOM | 15081 | NE2 | GLN A 229 | -44.380 | -20.849 | -58.942 | 1.00 | 0.00 | D | N |
| ATOM | 15082 | C   | GLN A 229 | -42.103 | -25.028 | -59.132 | 1.00 | 0.00 | D | C |
| ATOM | 15083 | O   | GLN A 229 | -42.074 | -24.739 | -57.937 | 1.00 | 0.00 | D | O |
| ATOM | 15084 | N   | ALA A 230 | -41.647 | -26.220 | -59.573 | 1.00 | 0.00 | D | N |
| ATOM | 15085 | CA  | ALA A 230 | -41.151 | -27.225 | -58.659 | 1.00 | 0.00 | D | C |
| ATOM | 15086 | CB  | ALA A 230 | -40.532 | -28.444 | -59.367 | 1.00 | 0.00 | D | C |
| ATOM | 15087 | C   | ALA A 230 | -40.102 | -26.677 | -57.735 | 1.00 | 0.00 | D | C |
| ATOM | 15088 | O   | ALA A 230 | -39.141 | -26.041 | -58.161 | 1.00 | 0.00 | D | O |
| ATOM | 15089 | N   | ALA A 231 | -40.251 | -26.965 | -56.423 | 1.00 | 0.00 | D | N |
| ATOM | 15090 | CA  | ALA A 231 | -39.333 | -26.433 | -55.453 | 1.00 | 0.00 | D | C |
| ATOM | 15091 | CB  | ALA A 231 | -40.029 | -25.905 | -54.187 | 1.00 | 0.00 | D | C |
| ATOM | 15092 | C   | ALA A 231 | -38.374 | -27.493 | -55.006 | 1.00 | 0.00 | D | C |
| ATOM | 15093 | O   | ALA A 231 | -38.773 | -28.561 | -54.543 | 1.00 | 0.00 | D | O |
| ATOM | 15094 | N   | ALA A 232 | -37.059 | -27.206 | -55.132 | 1.00 | 0.00 | D | N |
| ATOM | 15095 | CA  | ALA A 232 | -36.078 | -28.128 | -54.637 | 1.00 | 0.00 | D | C |
| ATOM | 15096 | CB  | ALA A 232 | -34.758 | -28.095 | -55.422 | 1.00 | 0.00 | D | C |
| ATOM | 15097 | C   | ALA A 232 | -35.783 | -27.662 | -53.239 | 1.00 | 0.00 | D | C |
| ATOM | 15098 | O   | ALA A 232 | -35.069 | -26.683 | -53.042 | 1.00 | 0.00 | D | O |
| ATOM | 15099 | N   | HSD A 233 | -36.427 | -28.331 | -52.259 | 1.00 | 0.00 | D | N |
| ATOM | 15100 | CA  | HSD A 233 | -36.433 | -28.120 | -50.831 | 1.00 | 0.00 | D | C |
| ATOM | 15101 | CB  | HSD A 233 | -37.804 | -28.437 | -50.208 | 1.00 | 0.00 | D | C |
| ATOM | 15102 | ND1 | HSD A 233 | -39.188 | -29.636 | -51.957 | 1.00 | 0.00 | D | N |
| ATOM | 15103 | CG  | HSD A 233 | -38.447 | -29.657 | -50.795 | 1.00 | 0.00 | D | C |
| ATOM | 15104 | CE1 | HSD A 233 | -39.600 | -30.908 | -52.179 | 1.00 | 0.00 | D | C |

|      |       |     |     |   |     |         |         |         |      |      |   |   |
|------|-------|-----|-----|---|-----|---------|---------|---------|------|------|---|---|
| ATOM | 15105 | NE2 | HSD | A | 233 | -39.180 | -31.742 | -51.246 | 1.00 | 0.00 | D | N |
| ATOM | 15106 | CD2 | HSD | A | 233 | -38.455 | -30.949 | -50.375 | 1.00 | 0.00 | D | C |
| ATOM | 15107 | C   | HSD | A | 233 | -35.371 | -28.807 | -50.011 | 1.00 | 0.00 | D | C |
| ATOM | 15108 | O   | HSD | A | 233 | -35.228 | -28.485 | -48.831 | 1.00 | 0.00 | D | O |
| ATOM | 15109 | N   | GLY | A | 234 | -34.646 | -29.809 | -50.539 | 1.00 | 0.00 | D | N |
| ATOM | 15110 | CA  | GLY | A | 234 | -33.773 | -30.612 | -49.709 | 1.00 | 0.00 | D | C |
| ATOM | 15111 | C   | GLY | A | 234 | -32.701 | -29.785 | -49.056 | 1.00 | 0.00 | D | C |
| ATOM | 15112 | O   | GLY | A | 234 | -32.485 | -28.629 | -49.400 | 1.00 | 0.00 | D | O |
| ATOM | 15113 | N   | ASP | A | 235 | -31.973 | -30.404 | -48.100 | 1.00 | 0.00 | D | N |
| ATOM | 15114 | CA  | ASP | A | 235 | -30.959 | -29.755 | -47.310 | 1.00 | 0.00 | D | C |
| ATOM | 15115 | CB  | ASP | A | 235 | -30.321 | -30.673 | -46.250 | 1.00 | 0.00 | D | C |
| ATOM | 15116 | CG  | ASP | A | 235 | -31.316 | -30.799 | -45.100 | 1.00 | 0.00 | D | C |
| ATOM | 15117 | OD1 | ASP | A | 235 | -32.276 | -29.983 | -45.063 | 1.00 | 0.00 | D | O |
| ATOM | 15118 | OD2 | ASP | A | 235 | -31.130 | -31.706 | -44.246 | 1.00 | 0.00 | D | O |
| ATOM | 15119 | C   | ASP | A | 235 | -29.880 | -29.221 | -48.202 | 1.00 | 0.00 | D | C |
| ATOM | 15120 | O   | ASP | A | 235 | -29.187 | -28.269 | -47.851 | 1.00 | 0.00 | D | O |
| ATOM | 15121 | N   | PHE | A | 236 | -29.702 | -29.833 | -49.384 | 1.00 | 0.00 | D | N |
| ATOM | 15122 | CA  | PHE | A | 236 | -28.708 | -29.390 | -50.321 | 1.00 | 0.00 | D | C |
| ATOM | 15123 | CB  | PHE | A | 236 | -28.622 | -30.291 | -51.568 | 1.00 | 0.00 | D | C |
| ATOM | 15124 | CG  | PHE | A | 236 | -27.671 | -29.662 | -52.530 | 1.00 | 0.00 | D | C |
| ATOM | 15125 | CD1 | PHE | A | 236 | -26.312 | -29.779 | -52.356 | 1.00 | 0.00 | D | C |
| ATOM | 15126 | CE1 | PHE | A | 236 | -25.436 | -29.194 | -53.242 | 1.00 | 0.00 | D | C |
| ATOM | 15127 | CZ  | PHE | A | 236 | -25.918 | -28.479 | -54.312 | 1.00 | 0.00 | D | C |
| ATOM | 15128 | CD2 | PHE | A | 236 | -28.144 | -28.938 | -53.599 | 1.00 | 0.00 | D | C |
| ATOM | 15129 | CE2 | PHE | A | 236 | -27.275 | -28.352 | -54.489 | 1.00 | 0.00 | D | C |
| ATOM | 15130 | C   | PHE | A | 236 | -29.028 | -27.989 | -50.753 | 1.00 | 0.00 | D | C |
| ATOM | 15131 | O   | PHE | A | 236 | -28.141 | -27.225 | -51.119 | 1.00 | 0.00 | D | O |
| ATOM | 15132 | N   | PHE | A | 237 | -30.329 | -27.668 | -50.808 | 1.00 | 0.00 | D | N |
| ATOM | 15133 | CA  | PHE | A | 237 | -30.935 | -26.435 | -51.223 | 1.00 | 0.00 | D | C |
| ATOM | 15134 | CB  | PHE | A | 237 | -32.355 | -26.673 | -51.753 | 1.00 | 0.00 | D | C |
| ATOM | 15135 | CG  | PHE | A | 237 | -32.131 | -27.624 | -52.883 | 1.00 | 0.00 | D | C |
| ATOM | 15136 | CD1 | PHE | A | 237 | -31.596 | -27.184 | -54.073 | 1.00 | 0.00 | D | C |
| ATOM | 15137 | CE1 | PHE | A | 237 | -31.381 | -28.060 | -55.112 | 1.00 | 0.00 | D | C |
| ATOM | 15138 | CZ  | PHE | A | 237 | -31.700 | -29.389 | -54.973 | 1.00 | 0.00 | D | C |
| ATOM | 15139 | CD2 | PHE | A | 237 | -32.445 | -28.956 | -52.750 | 1.00 | 0.00 | D | C |
| ATOM | 15140 | CE2 | PHE | A | 237 | -32.232 | -29.836 | -53.788 | 1.00 | 0.00 | D | C |
| ATOM | 15141 | C   | PHE | A | 237 | -30.928 | -25.344 | -50.191 | 1.00 | 0.00 | D | C |
| ATOM | 15142 | O   | PHE | A | 237 | -31.294 | -24.220 | -50.527 | 1.00 | 0.00 | D | O |

|      |       |     |           |         |         |         |      |      |   |   |
|------|-------|-----|-----------|---------|---------|---------|------|------|---|---|
| ATOM | 15143 | N   | LYS A 238 | -30.665 | -25.657 | -48.900 | 1.00 | 0.00 | D | N |
| ATOM | 15144 | CA  | LYS A 238 | -30.683 | -24.659 | -47.861 | 1.00 | 0.00 | D | C |
| ATOM | 15145 | CB  | LYS A 238 | -31.625 | -25.011 | -46.698 | 1.00 | 0.00 | D | C |
| ATOM | 15146 | CG  | LYS A 238 | -33.106 | -24.896 | -47.065 | 1.00 | 0.00 | D | C |
| ATOM | 15147 | CD  | LYS A 238 | -34.047 | -25.602 | -46.086 | 1.00 | 0.00 | D | C |
| ATOM | 15148 | CE  | LYS A 238 | -33.597 | -25.533 | -44.625 | 1.00 | 0.00 | D | C |
| ATOM | 15149 | NZ  | LYS A 238 | -32.519 | -26.514 | -44.375 | 1.00 | 0.00 | D | N |
| ATOM | 15150 | C   | LYS A 238 | -29.305 | -24.442 | -47.296 | 1.00 | 0.00 | D | C |
| ATOM | 15151 | O   | LYS A 238 | -28.321 | -25.020 | -47.757 | 1.00 | 0.00 | D | O |
| ATOM | 15152 | N   | LYS A 239 | -29.236 | -23.571 | -46.260 | 1.00 | 0.00 | D | N |
| ATOM | 15153 | CA  | LYS A 239 | -28.021 | -23.124 | -45.636 | 1.00 | 0.00 | D | C |
| ATOM | 15154 | CB  | LYS A 239 | -28.273 | -22.142 | -44.478 | 1.00 | 0.00 | D | C |
| ATOM | 15155 | CG  | LYS A 239 | -28.945 | -20.844 | -44.936 | 1.00 | 0.00 | D | C |
| ATOM | 15156 | CD  | LYS A 239 | -29.545 | -20.014 | -43.799 | 1.00 | 0.00 | D | C |
| ATOM | 15157 | CE  | LYS A 239 | -30.264 | -18.751 | -44.280 | 1.00 | 0.00 | D | C |
| ATOM | 15158 | NZ  | LYS A 239 | -30.914 | -18.065 | -43.140 | 1.00 | 0.00 | D | N |
| ATOM | 15159 | C   | LYS A 239 | -27.244 | -24.283 | -45.109 | 1.00 | 0.00 | D | C |
| ATOM | 15160 | O   | LYS A 239 | -27.776 | -25.221 | -44.518 | 1.00 | 0.00 | D | O |
| ATOM | 15161 | N   | THR A 240 | -25.918 | -24.181 | -45.309 | 1.00 | 0.00 | D | N |
| ATOM | 15162 | CA  | THR A 240 | -24.920 | -25.160 | -45.021 | 1.00 | 0.00 | D | C |
| ATOM | 15163 | CB  | THR A 240 | -23.586 | -24.650 | -45.497 | 1.00 | 0.00 | D | C |
| ATOM | 15164 | OG1 | THR A 240 | -22.626 | -25.688 | -45.601 | 1.00 | 0.00 | D | O |
| ATOM | 15165 | CG2 | THR A 240 | -23.107 | -23.557 | -44.528 | 1.00 | 0.00 | D | C |
| ATOM | 15166 | C   | THR A 240 | -24.891 | -25.422 | -43.544 | 1.00 | 0.00 | D | C |
| ATOM | 15167 | O   | THR A 240 | -24.946 | -24.510 | -42.724 | 1.00 | 0.00 | D | O |
| ATOM | 15168 | N   | LYS A 241 | -24.845 | -26.723 | -43.203 | 1.00 | 0.00 | D | N |
| ATOM | 15169 | CA  | LYS A 241 | -24.778 | -27.310 | -41.896 | 1.00 | 0.00 | D | C |
| ATOM | 15170 | CB  | LYS A 241 | -24.956 | -28.835 | -41.924 | 1.00 | 0.00 | D | C |
| ATOM | 15171 | CG  | LYS A 241 | -26.411 | -29.248 | -42.141 | 1.00 | 0.00 | D | C |
| ATOM | 15172 | CD  | LYS A 241 | -26.590 | -30.712 | -42.541 | 1.00 | 0.00 | D | C |
| ATOM | 15173 | CE  | LYS A 241 | -25.803 | -31.698 | -41.678 | 1.00 | 0.00 | D | C |
| ATOM | 15174 | NZ  | LYS A 241 | -24.367 | -31.678 | -42.036 | 1.00 | 0.00 | D | N |
| ATOM | 15175 | C   | LYS A 241 | -23.489 | -27.019 | -41.178 | 1.00 | 0.00 | D | C |
| ATOM | 15176 | O   | LYS A 241 | -23.528 | -26.826 | -39.963 | 1.00 | 0.00 | D | O |
| ATOM | 15177 | N   | GLY A 242 | -22.309 | -26.939 | -41.843 | 1.00 | 0.00 | D | N |
| ATOM | 15178 | CA  | GLY A 242 | -22.061 | -27.012 | -43.256 | 1.00 | 0.00 | D | C |
| ATOM | 15179 | C   | GLY A 242 | -22.338 | -28.363 | -43.836 | 1.00 | 0.00 | D | C |
| ATOM | 15180 | O   | GLY A 242 | -21.631 | -29.328 | -43.557 | 1.00 | 0.00 | D | O |

|      |       |     |           |         |         |         |      |      |   |   |
|------|-------|-----|-----------|---------|---------|---------|------|------|---|---|
| ATOM | 15181 | N   | ARG A 243 | -23.417 | -28.466 | -44.644 | 1.00 | 0.00 | D | N |
| ATOM | 15182 | CA  | ARG A 243 | -23.690 | -29.671 | -45.357 | 1.00 | 0.00 | D | C |
| ATOM | 15183 | CB  | ARG A 243 | -25.156 | -29.832 | -45.789 | 1.00 | 0.00 | D | C |
| ATOM | 15184 | CG  | ARG A 243 | -25.410 | -31.182 | -46.456 | 1.00 | 0.00 | D | C |
| ATOM | 15185 | CD  | ARG A 243 | -26.789 | -31.779 | -46.174 | 1.00 | 0.00 | D | C |
| ATOM | 15186 | NE  | ARG A 243 | -26.708 | -32.423 | -44.836 | 1.00 | 0.00 | D | N |
| ATOM | 15187 | CZ  | ARG A 243 | -27.653 | -33.323 | -44.438 | 1.00 | 0.00 | D | C |
| ATOM | 15188 | NH1 | ARG A 243 | -28.684 | -33.655 | -45.270 | 1.00 | 0.00 | D | N |
| ATOM | 15189 | NH2 | ARG A 243 | -27.563 | -33.893 | -43.201 | 1.00 | 0.00 | D | N |
| ATOM | 15190 | C   | ARG A 243 | -22.793 | -29.795 | -46.549 | 1.00 | 0.00 | D | C |
| ATOM | 15191 | O   | ARG A 243 | -22.126 | -30.823 | -46.667 | 1.00 | 0.00 | D | O |
| ATOM | 15192 | N   | PRO A 244 | -22.667 | -28.840 | -47.458 | 1.00 | 0.00 | D | N |
| ATOM | 15193 | CD  | PRO A 244 | -21.341 | -28.687 | -48.031 | 1.00 | 0.00 | D | C |
| ATOM | 15194 | CA  | PRO A 244 | -23.416 | -27.587 | -47.524 | 1.00 | 0.00 | D | C |
| ATOM | 15195 | CB  | PRO A 244 | -22.536 | -26.632 | -48.335 | 1.00 | 0.00 | D | C |
| ATOM | 15196 | CG  | PRO A 244 | -21.118 | -27.185 | -48.205 | 1.00 | 0.00 | D | C |
| ATOM | 15197 | C   | PRO A 244 | -24.797 | -27.751 | -48.118 | 1.00 | 0.00 | D | C |
| ATOM | 15198 | O   | PRO A 244 | -25.155 | -28.880 | -48.445 | 1.00 | 0.00 | D | O |
| ATOM | 15199 | N   | GLY A 245 | -25.587 | -26.657 | -48.315 | 1.00 | 0.00 | D | N |
| ATOM | 15200 | CA  | GLY A 245 | -25.209 | -25.484 | -49.079 | 1.00 | 0.00 | D | C |
| ATOM | 15201 | C   | GLY A 245 | -25.359 | -25.856 | -50.526 | 1.00 | 0.00 | D | C |
| ATOM | 15202 | O   | GLY A 245 | -24.843 | -26.894 | -50.941 | 1.00 | 0.00 | D | O |
| ATOM | 15203 | N   | PHE A 246 | -25.981 | -25.003 | -51.386 | 1.00 | 0.00 | D | N |
| ATOM | 15204 | CA  | PHE A 246 | -26.316 | -23.614 | -51.173 | 1.00 | 0.00 | D | C |
| ATOM | 15205 | CB  | PHE A 246 | -25.348 | -22.739 | -51.996 | 1.00 | 0.00 | D | C |
| ATOM | 15206 | CG  | PHE A 246 | -25.911 | -21.400 | -52.323 | 1.00 | 0.00 | D | C |
| ATOM | 15207 | CD1 | PHE A 246 | -25.893 | -20.345 | -51.440 | 1.00 | 0.00 | D | C |
| ATOM | 15208 | CE1 | PHE A 246 | -26.420 | -19.127 | -51.808 | 1.00 | 0.00 | D | C |
| ATOM | 15209 | CZ  | PHE A 246 | -26.962 | -18.952 | -53.061 | 1.00 | 0.00 | D | C |
| ATOM | 15210 | CD2 | PHE A 246 | -26.447 | -21.211 | -53.577 | 1.00 | 0.00 | D | C |
| ATOM | 15211 | CE2 | PHE A 246 | -26.975 | -19.999 | -53.952 | 1.00 | 0.00 | D | C |
| ATOM | 15212 | C   | PHE A 246 | -27.739 | -23.286 | -51.543 | 1.00 | 0.00 | D | C |
| ATOM | 15213 | O   | PHE A 246 | -28.359 | -23.959 | -52.367 | 1.00 | 0.00 | D | O |
| ATOM | 15214 | N   | TYR A 247 | -28.261 | -22.178 | -50.952 | 1.00 | 0.00 | D | N |
| ATOM | 15215 | CA  | TYR A 247 | -29.660 | -21.831 | -51.014 | 1.00 | 0.00 | D | C |
| ATOM | 15216 | CB  | TYR A 247 | -30.193 | -21.638 | -49.586 | 1.00 | 0.00 | D | C |
| ATOM | 15217 | CG  | TYR A 247 | -31.481 | -20.906 | -49.590 | 1.00 | 0.00 | D | C |
| ATOM | 15218 | CD1 | TYR A 247 | -32.686 | -21.553 | -49.735 | 1.00 | 0.00 | D | C |

|      |       |               |         |         |         |      |      |   |   |
|------|-------|---------------|---------|---------|---------|------|------|---|---|
| ATOM | 15219 | CE1 TYR A 247 | -33.856 | -20.827 | -49.723 | 1.00 | 0.00 | D | C |
| ATOM | 15220 | CZ TYR A 247  | -33.817 | -19.459 | -49.564 | 1.00 | 0.00 | D | C |
| ATOM | 15221 | OH TYR A 247  | -35.006 | -18.707 | -49.546 | 1.00 | 0.00 | D | O |
| ATOM | 15222 | CD2 TYR A 247 | -31.455 | -19.544 | -49.433 | 1.00 | 0.00 | D | C |
| ATOM | 15223 | CE2 TYR A 247 | -32.614 | -18.816 | -49.418 | 1.00 | 0.00 | D | C |
| ATOM | 15224 | C TYR A 247   | -29.945 | -20.592 | -51.828 | 1.00 | 0.00 | D | C |
| ATOM | 15225 | O TYR A 247   | -29.577 | -19.477 | -51.473 | 1.00 | 0.00 | D | O |
| ATOM | 15226 | N PHE A 248   | -30.516 | -20.823 | -53.025 | 1.00 | 0.00 | D | N |
| ATOM | 15227 | CA PHE A 248  | -31.047 | -19.942 | -54.038 | 1.00 | 0.00 | D | C |
| ATOM | 15228 | CB PHE A 248  | -30.660 | -20.385 | -55.451 | 1.00 | 0.00 | D | C |
| ATOM | 15229 | CG PHE A 248  | -31.092 | -21.792 | -55.616 | 1.00 | 0.00 | D | C |
| ATOM | 15230 | CD1 PHE A 248 | -30.276 | -22.811 | -55.190 | 1.00 | 0.00 | D | C |
| ATOM | 15231 | CE1 PHE A 248 | -30.664 | -24.121 | -55.341 | 1.00 | 0.00 | D | C |
| ATOM | 15232 | CZ PHE A 248  | -31.877 | -24.411 | -55.919 | 1.00 | 0.00 | D | C |
| ATOM | 15233 | CD2 PHE A 248 | -32.309 | -22.088 | -56.186 | 1.00 | 0.00 | D | C |
| ATOM | 15234 | CE2 PHE A 248 | -32.700 | -23.396 | -56.341 | 1.00 | 0.00 | D | C |
| ATOM | 15235 | C PHE A 248   | -32.521 | -19.769 | -53.934 | 1.00 | 0.00 | D | C |
| ATOM | 15236 | O PHE A 248   | -33.166 | -19.213 | -54.821 | 1.00 | 0.00 | D | O |
| ATOM | 15237 | N GLY A 249   | -33.074 | -20.546 | -53.013 | 1.00 | 0.00 | D | N |
| ATOM | 15238 | CA GLY A 249  | -34.417 | -20.686 | -52.609 | 1.00 | 0.00 | D | C |
| ATOM | 15239 | C GLY A 249   | -35.218 | -21.413 | -53.638 | 1.00 | 0.00 | D | C |
| ATOM | 15240 | O GLY A 249   | -35.883 | -20.768 | -54.440 | 1.00 | 0.00 | D | O |
| ATOM | 15241 | N GLU A 250   | -35.000 | -22.733 | -53.759 | 1.00 | 0.00 | D | N |
| ATOM | 15242 | CA GLU A 250  | -35.921 | -23.750 | -54.216 | 1.00 | 0.00 | D | C |
| ATOM | 15243 | CB GLU A 250  | -37.034 | -23.962 | -53.179 | 1.00 | 0.00 | D | C |
| ATOM | 15244 | CG GLU A 250  | -36.486 | -24.352 | -51.806 | 1.00 | 0.00 | D | C |
| ATOM | 15245 | CD GLU A 250  | -37.657 | -24.540 | -50.854 | 1.00 | 0.00 | D | C |
| ATOM | 15246 | OE1 GLU A 250 | -38.819 | -24.533 | -51.343 | 1.00 | 0.00 | D | O |
| ATOM | 15247 | OE2 GLU A 250 | -37.407 | -24.702 | -49.631 | 1.00 | 0.00 | D | O |
| ATOM | 15248 | C GLU A 250   | -36.602 | -23.662 | -55.564 | 1.00 | 0.00 | D | C |
| ATOM | 15249 | O GLU A 250   | -36.919 | -24.711 | -56.127 | 1.00 | 0.00 | D | O |
| ATOM | 15250 | N LEU A 251   | -36.781 | -22.480 | -56.179 | 1.00 | 0.00 | D | N |
| ATOM | 15251 | CA LEU A 251  | -37.591 | -22.409 | -57.377 | 1.00 | 0.00 | D | C |
| ATOM | 15252 | CB LEU A 251  | -38.658 | -21.298 | -57.332 | 1.00 | 0.00 | D | C |
| ATOM | 15253 | CG LEU A 251  | -39.784 | -21.487 | -56.299 | 1.00 | 0.00 | D | C |
| ATOM | 15254 | CD1 LEU A 251 | -40.748 | -20.291 | -56.329 | 1.00 | 0.00 | D | C |
| ATOM | 15255 | CD2 LEU A 251 | -40.529 | -22.816 | -56.502 | 1.00 | 0.00 | D | C |
| ATOM | 15256 | C LEU A 251   | -36.698 | -22.041 | -58.513 | 1.00 | 0.00 | D | C |

ATOM 15257 O LEU A 251 -35.819 -21.198 -58.356 1.00 0.00 D O  
ATOM 15258 N PRO A 252 -36.954 -22.599 -59.670 1.00 0.00 D N  
ATOM 15259 CD PRO A 252 -37.870 -23.719 -59.805 1.00 0.00 D C  
ATOM 15260 CA PRO A 252 -36.131 -22.415 -60.831 1.00 0.00 D C  
ATOM 15261 CB PRO A 252 -36.818 -23.202 -61.945 1.00 0.00 D C  
ATOM 15262 CG PRO A 252 -37.558 -24.323 -61.187 1.00 0.00 D C  
ATOM 15263 C PRO A 252 -35.837 -20.979 -61.147 1.00 0.00 D C  
ATOM 15264 O PRO A 252 -34.682 -20.670 -61.427 1.00 0.00 D O  
ATOM 15265 N LEU A 253 -36.837 -20.084 -61.089 1.00 0.00 D N  
ATOM 15266 CA LEU A 253 -36.584 -18.698 -61.369 1.00 0.00 D C  
ATOM 15267 CB LEU A 253 -37.841 -17.821 -61.252 1.00 0.00 D C  
ATOM 15268 CG LEU A 253 -37.584 -16.330 -61.552 1.00 0.00 D C  
ATOM 15269 CD1 LEU A 253 -37.290 -16.079 -63.036 1.00 0.00 D C  
ATOM 15270 CD2 LEU A 253 -38.718 -15.450 -61.023 1.00 0.00 D C  
ATOM 15271 C LEU A 253 -35.610 -18.182 -60.349 1.00 0.00 D C  
ATOM 15272 O LEU A 253 -34.663 -17.474 -60.685 1.00 0.00 D O  
ATOM 15273 N SER A 254 -35.811 -18.548 -59.067 1.00 0.00 D N  
ATOM 15274 CA SER A 254 -34.986 -18.048 -58.001 1.00 0.00 D C  
ATOM 15275 CB SER A 254 -35.426 -18.577 -56.627 1.00 0.00 D C  
ATOM 15276 OG SER A 254 -36.734 -18.106 -56.333 1.00 0.00 D O  
ATOM 15277 C SER A 254 -33.578 -18.492 -58.235 1.00 0.00 D C  
ATOM 15278 O SER A 254 -32.638 -17.711 -58.096 1.00 0.00 D O  
ATOM 15279 N LEU A 255 -33.409 -19.768 -58.612 1.00 0.00 D N  
ATOM 15280 CA LEU A 255 -32.114 -20.322 -58.876 1.00 0.00 D C  
ATOM 15281 CB LEU A 255 -32.204 -21.804 -59.298 1.00 0.00 D C  
ATOM 15282 CG LEU A 255 -30.844 -22.464 -59.599 1.00 0.00 D C  
ATOM 15283 CD1 LEU A 255 -29.952 -22.493 -58.352 1.00 0.00 D C  
ATOM 15284 CD2 LEU A 255 -31.017 -23.863 -60.220 1.00 0.00 D C  
ATOM 15285 C LEU A 255 -31.491 -19.570 -60.009 1.00 0.00 D C  
ATOM 15286 O LEU A 255 -30.346 -19.127 -59.925 1.00 0.00 D O  
ATOM 15287 N ALA A 256 -32.262 -19.345 -61.088 1.00 0.00 D N  
ATOM 15288 CA ALA A 256 -31.717 -18.743 -62.275 1.00 0.00 D C  
ATOM 15289 CB ALA A 256 -32.754 -18.593 -63.401 1.00 0.00 D C  
ATOM 15290 C ALA A 256 -31.199 -17.375 -61.947 1.00 0.00 D C  
ATOM 15291 O ALA A 256 -30.182 -16.949 -62.492 1.00 0.00 D O  
ATOM 15292 N ALA A 257 -31.934 -16.622 -61.105 1.00 0.00 D N  
ATOM 15293 CA ALA A 257 -31.521 -15.296 -60.735 1.00 0.00 D C  
ATOM 15294 CB ALA A 257 -32.641 -14.531 -60.002 1.00 0.00 D C

|      |       |     |           |         |         |         |      |      |   |   |
|------|-------|-----|-----------|---------|---------|---------|------|------|---|---|
| ATOM | 15295 | C   | ALA A 257 | -30.304 | -15.302 | -59.844 | 1.00 | 0.00 | D | C |
| ATOM | 15296 | O   | ALA A 257 | -29.326 | -14.604 | -60.117 | 1.00 | 0.00 | D | O |
| ATOM | 15297 | N   | CYS A 258 | -30.305 | -16.146 | -58.788 | 1.00 | 0.00 | D | N |
| ATOM | 15298 | CA  | CYS A 258 | -29.275 | -16.159 | -57.780 | 1.00 | 0.00 | D | C |
| ATOM | 15299 | CB  | CYS A 258 | -29.549 | -17.161 | -56.642 | 1.00 | 0.00 | D | C |
| ATOM | 15300 | SG  | CYS A 258 | -30.918 | -16.643 | -55.563 | 1.00 | 0.00 | D | S |
| ATOM | 15301 | C   | CYS A 258 | -27.965 | -16.527 | -58.394 | 1.00 | 0.00 | D | C |
| ATOM | 15302 | O   | CYS A 258 | -26.905 | -16.146 | -57.903 | 1.00 | 0.00 | D | O |
| ATOM | 15303 | N   | THR A 259 | -28.020 | -17.360 | -59.440 | 1.00 | 0.00 | D | N |
| ATOM | 15304 | CA  | THR A 259 | -26.908 | -17.818 | -60.223 | 1.00 | 0.00 | D | C |
| ATOM | 15305 | CB  | THR A 259 | -27.202 | -19.076 | -60.991 | 1.00 | 0.00 | D | C |
| ATOM | 15306 | OG1 | THR A 259 | -28.262 | -18.864 | -61.909 | 1.00 | 0.00 | D | O |
| ATOM | 15307 | CG2 | THR A 259 | -27.578 | -20.181 | -59.988 | 1.00 | 0.00 | D | C |
| ATOM | 15308 | C   | THR A 259 | -26.473 | -16.759 | -61.187 | 1.00 | 0.00 | D | C |
| ATOM | 15309 | O   | THR A 259 | -25.477 | -16.931 | -61.889 | 1.00 | 0.00 | D | O |
| ATOM | 15310 | N   | ASN A 260 | -27.252 | -15.666 | -61.311 | 1.00 | 0.00 | D | N |
| ATOM | 15311 | CA  | ASN A 260 | -26.947 | -14.600 | -62.219 | 1.00 | 0.00 | D | C |
| ATOM | 15312 | CB  | ASN A 260 | -25.598 | -13.915 | -61.925 | 1.00 | 0.00 | D | C |
| ATOM | 15313 | CG  | ASN A 260 | -25.645 | -12.535 | -62.561 | 1.00 | 0.00 | D | C |
| ATOM | 15314 | OD1 | ASN A 260 | -26.678 | -11.868 | -62.526 | 1.00 | 0.00 | D | O |
| ATOM | 15315 | ND2 | ASN A 260 | -24.506 | -12.097 | -63.161 | 1.00 | 0.00 | D | N |
| ATOM | 15316 | C   | ASN A 260 | -26.971 | -15.092 | -63.633 | 1.00 | 0.00 | D | C |
| ATOM | 15317 | O   | ASN A 260 | -25.996 | -14.975 | -64.376 | 1.00 | 0.00 | D | O |
| ATOM | 15318 | N   | GLN A 261 | -28.095 | -15.715 | -64.034 | 1.00 | 0.00 | D | N |
| ATOM | 15319 | CA  | GLN A 261 | -28.218 | -16.085 | -65.413 | 1.00 | 0.00 | D | C |
| ATOM | 15320 | CB  | GLN A 261 | -27.999 | -17.589 | -65.665 | 1.00 | 0.00 | D | C |
| ATOM | 15321 | CG  | GLN A 261 | -28.834 | -18.543 | -64.819 | 1.00 | 0.00 | D | C |
| ATOM | 15322 | CD  | GLN A 261 | -28.176 | -19.912 | -64.959 | 1.00 | 0.00 | D | C |
| ATOM | 15323 | OE1 | GLN A 261 | -27.632 | -20.245 | -66.011 | 1.00 | 0.00 | D | O |
| ATOM | 15324 | NE2 | GLN A 261 | -28.214 | -20.725 | -63.871 | 1.00 | 0.00 | D | N |
| ATOM | 15325 | C   | GLN A 261 | -29.512 | -15.538 | -65.934 | 1.00 | 0.00 | D | C |
| ATOM | 15326 | O   | GLN A 261 | -30.566 | -16.173 | -65.898 | 1.00 | 0.00 | D | O |
| ATOM | 15327 | N   | LEU A 262 | -29.418 | -14.306 | -66.478 | 1.00 | 0.00 | D | N |
| ATOM | 15328 | CA  | LEU A 262 | -30.554 | -13.526 | -66.873 | 1.00 | 0.00 | D | C |
| ATOM | 15329 | CB  | LEU A 262 | -30.209 | -12.092 | -67.291 | 1.00 | 0.00 | D | C |
| ATOM | 15330 | CG  | LEU A 262 | -31.465 | -11.302 | -67.693 | 1.00 | 0.00 | D | C |
| ATOM | 15331 | CD1 | LEU A 262 | -32.419 | -11.125 | -66.500 | 1.00 | 0.00 | D | C |
| ATOM | 15332 | CD2 | LEU A 262 | -31.101 | -9.975  | -68.368 | 1.00 | 0.00 | D | C |



|      |       |     |           |         |         |         |      |      |   |   |
|------|-------|-----|-----------|---------|---------|---------|------|------|---|---|
| ATOM | 15333 | C   | LEU A 262 | -31.326 | -14.137 | -67.993 | 1.00 | 0.00 | D | C |
| ATOM | 15334 | O   | LEU A 262 | -32.555 | -14.135 | -67.955 | 1.00 | 0.00 | D | O |
| ATOM | 15335 | N   | GLY A 263 | -30.647 | -14.699 | -69.012 | 1.00 | 0.00 | D | N |
| ATOM | 15336 | CA  | GLY A 263 | -31.357 | -15.167 | -70.169 | 1.00 | 0.00 | D | C |
| ATOM | 15337 | C   | GLY A 263 | -32.360 | -16.195 | -69.755 | 1.00 | 0.00 | D | C |
| ATOM | 15338 | O   | GLY A 263 | -33.485 | -16.211 | -70.252 | 1.00 | 0.00 | D | O |
| ATOM | 15339 | N   | ILE A 264 | -31.966 | -17.097 | -68.842 | 1.00 | 0.00 | D | N |
| ATOM | 15340 | CA  | ILE A 264 | -32.849 | -18.124 | -68.372 | 1.00 | 0.00 | D | C |
| ATOM | 15341 | CB  | ILE A 264 | -32.159 | -19.198 | -67.578 | 1.00 | 0.00 | D | C |
| ATOM | 15342 | CG2 | ILE A 264 | -33.234 | -20.151 | -67.031 | 1.00 | 0.00 | D | C |
| ATOM | 15343 | CG1 | ILE A 264 | -31.122 | -19.909 | -68.466 | 1.00 | 0.00 | D | C |
| ATOM | 15344 | CD  | ILE A 264 | -30.293 | -20.958 | -67.726 | 1.00 | 0.00 | D | C |
| ATOM | 15345 | C   | ILE A 264 | -33.949 | -17.511 | -67.560 | 1.00 | 0.00 | D | C |
| ATOM | 15346 | O   | ILE A 264 | -35.085 | -17.982 | -67.592 | 1.00 | 0.00 | D | O |
| ATOM | 15347 | N   | VAL A 265 | -33.645 | -16.453 | -66.776 | 1.00 | 0.00 | D | N |
| ATOM | 15348 | CA  | VAL A 265 | -34.692 | -15.830 | -66.018 | 1.00 | 0.00 | D | C |
| ATOM | 15349 | CB  | VAL A 265 | -34.231 | -14.616 | -65.252 | 1.00 | 0.00 | D | C |
| ATOM | 15350 | CG1 | VAL A 265 | -35.460 | -13.897 | -64.666 | 1.00 | 0.00 | D | C |
| ATOM | 15351 | CG2 | VAL A 265 | -33.232 | -15.065 | -64.175 | 1.00 | 0.00 | D | C |
| ATOM | 15352 | C   | VAL A 265 | -35.739 | -15.374 | -66.989 | 1.00 | 0.00 | D | C |
| ATOM | 15353 | O   | VAL A 265 | -36.932 | -15.592 | -66.770 | 1.00 | 0.00 | D | O |
| ATOM | 15354 | N   | LYS A 266 | -35.317 | -14.745 | -68.104 | 1.00 | 0.00 | D | N |
| ATOM | 15355 | CA  | LYS A 266 | -36.264 | -14.259 | -69.069 | 1.00 | 0.00 | D | C |
| ATOM | 15356 | CB  | LYS A 266 | -35.606 | -13.480 | -70.224 | 1.00 | 0.00 | D | C |
| ATOM | 15357 | CG  | LYS A 266 | -35.055 | -12.113 | -69.803 | 1.00 | 0.00 | D | C |
| ATOM | 15358 | CD  | LYS A 266 | -34.194 | -11.428 | -70.867 | 1.00 | 0.00 | D | C |
| ATOM | 15359 | CE  | LYS A 266 | -33.741 | -10.017 | -70.476 | 1.00 | 0.00 | D | C |
| ATOM | 15360 | NZ  | LYS A 266 | -32.949 | -9.412  | -71.572 | 1.00 | 0.00 | D | N |
| ATOM | 15361 | C   | LYS A 266 | -37.022 | -15.408 | -69.661 | 1.00 | 0.00 | D | C |
| ATOM | 15362 | O   | LYS A 266 | -38.248 | -15.382 | -69.759 | 1.00 | 0.00 | D | O |
| ATOM | 15363 | N   | PHE A 267 | -36.306 | -16.484 | -70.018 | 1.00 | 0.00 | D | N |
| ATOM | 15364 | CA  | PHE A 267 | -36.893 | -17.629 | -70.653 | 1.00 | 0.00 | D | C |
| ATOM | 15365 | CB  | PHE A 267 | -35.826 | -18.714 | -70.918 | 1.00 | 0.00 | D | C |
| ATOM | 15366 | CG  | PHE A 267 | -36.447 | -19.925 | -71.524 | 1.00 | 0.00 | D | C |
| ATOM | 15367 | CD1 | PHE A 267 | -36.961 | -20.917 | -70.720 | 1.00 | 0.00 | D | C |
| ATOM | 15368 | CE1 | PHE A 267 | -37.530 | -22.042 | -71.269 | 1.00 | 0.00 | D | C |
| ATOM | 15369 | CZ  | PHE A 267 | -37.589 | -22.186 | -72.634 | 1.00 | 0.00 | D | C |
| ATOM | 15370 | CD2 | PHE A 267 | -36.503 | -20.080 | -72.891 | 1.00 | 0.00 | D | C |

|      |       |     |     |   |     |         |         |         |      |      |   |   |
|------|-------|-----|-----|---|-----|---------|---------|---------|------|------|---|---|
| ATOM | 15371 | CE2 | PHE | A | 267 | -37.075 | -21.203 | -73.444 | 1.00 | 0.00 | D | C |
| ATOM | 15372 | C   | PHE | A | 267 | -37.939 | -18.198 | -69.748 | 1.00 | 0.00 | D | C |
| ATOM | 15373 | O   | PHE | A | 267 | -38.995 | -18.628 | -70.208 | 1.00 | 0.00 | D | O |
| ATOM | 15374 | N   | LEU | A | 268 | -37.669 | -18.242 | -68.430 | 1.00 | 0.00 | D | N |
| ATOM | 15375 | CA  | LEU | A | 268 | -38.640 | -18.835 | -67.553 | 1.00 | 0.00 | D | C |
| ATOM | 15376 | CB  | LEU | A | 268 | -38.161 | -18.922 | -66.092 | 1.00 | 0.00 | D | C |
| ATOM | 15377 | CG  | LEU | A | 268 | -36.987 | -19.894 | -65.867 | 1.00 | 0.00 | D | C |
| ATOM | 15378 | CD1 | LEU | A | 268 | -36.569 | -19.926 | -64.388 | 1.00 | 0.00 | D | C |
| ATOM | 15379 | CD2 | LEU | A | 268 | -37.300 | -21.297 | -66.414 | 1.00 | 0.00 | D | C |
| ATOM | 15380 | C   | LEU | A | 268 | -39.911 | -18.035 | -67.563 | 1.00 | 0.00 | D | C |
| ATOM | 15381 | O   | LEU | A | 268 | -40.999 | -18.588 | -67.698 | 1.00 | 0.00 | D | O |
| ATOM | 15382 | N   | LEU | A | 269 | -39.800 | -16.704 | -67.411 | 1.00 | 0.00 | D | N |
| ATOM | 15383 | CA  | LEU | A | 269 | -40.949 | -15.847 | -67.330 | 1.00 | 0.00 | D | C |
| ATOM | 15384 | CB  | LEU | A | 269 | -40.575 | -14.427 | -66.878 | 1.00 | 0.00 | D | C |
| ATOM | 15385 | CG  | LEU | A | 269 | -40.035 | -14.350 | -65.435 | 1.00 | 0.00 | D | C |
| ATOM | 15386 | CD1 | LEU | A | 269 | -39.683 | -12.905 | -65.056 | 1.00 | 0.00 | D | C |
| ATOM | 15387 | CD2 | LEU | A | 269 | -41.008 | -14.988 | -64.429 | 1.00 | 0.00 | D | C |
| ATOM | 15388 | C   | LEU | A | 269 | -41.687 | -15.724 | -68.639 | 1.00 | 0.00 | D | C |
| ATOM | 15389 | O   | LEU | A | 269 | -42.914 | -15.652 | -68.657 | 1.00 | 0.00 | D | O |
| ATOM | 15390 | N   | GLN | A | 270 | -40.942 | -15.594 | -69.755 | 1.00 | 0.00 | D | N |
| ATOM | 15391 | CA  | GLN | A | 270 | -41.468 | -15.359 | -71.078 | 1.00 | 0.00 | D | C |
| ATOM | 15392 | CB  | GLN | A | 270 | -40.459 | -14.625 | -71.974 | 1.00 | 0.00 | D | C |
| ATOM | 15393 | CG  | GLN | A | 270 | -40.205 | -13.202 | -71.469 | 1.00 | 0.00 | D | C |
| ATOM | 15394 | CD  | GLN | A | 270 | -39.201 | -12.529 | -72.389 | 1.00 | 0.00 | D | C |
| ATOM | 15395 | OE1 | GLN | A | 270 | -38.799 | -13.087 | -73.408 | 1.00 | 0.00 | D | O |
| ATOM | 15396 | NE2 | GLN | A | 270 | -38.787 | -11.291 | -72.016 | 1.00 | 0.00 | D | N |
| ATOM | 15397 | C   | GLN | A | 270 | -42.025 | -16.542 | -71.841 | 1.00 | 0.00 | D | C |
| ATOM | 15398 | O   | GLN | A | 270 | -42.973 | -16.374 | -72.606 | 1.00 | 0.00 | D | O |
| ATOM | 15399 | N   | ASN | A | 271 | -41.471 | -17.762 | -71.669 | 1.00 | 0.00 | D | N |
| ATOM | 15400 | CA  | ASN | A | 271 | -41.771 | -18.871 | -72.553 | 1.00 | 0.00 | D | C |
| ATOM | 15401 | CB  | ASN | A | 271 | -41.043 | -20.191 | -72.220 | 1.00 | 0.00 | D | C |
| ATOM | 15402 | CG  | ASN | A | 271 | -41.590 | -20.762 | -70.922 | 1.00 | 0.00 | D | C |
| ATOM | 15403 | OD1 | ASN | A | 271 | -42.435 | -21.655 | -70.941 | 1.00 | 0.00 | D | O |
| ATOM | 15404 | ND2 | ASN | A | 271 | -41.094 | -20.251 | -69.768 | 1.00 | 0.00 | D | N |
| ATOM | 15405 | C   | ASN | A | 271 | -43.237 | -19.173 | -72.673 | 1.00 | 0.00 | D | C |
| ATOM | 15406 | O   | ASN | A | 271 | -44.053 | -18.834 | -71.819 | 1.00 | 0.00 | D | O |
| ATOM | 15407 | N   | SER | A | 272 | -43.592 | -19.792 | -73.824 | 1.00 | 0.00 | D | N |
| ATOM | 15408 | CA  | SER | A | 272 | -44.929 | -20.149 | -74.209 | 1.00 | 0.00 | D | C |

|      |       |     |     |   |     |         |         |         |      |      |   |   |
|------|-------|-----|-----|---|-----|---------|---------|---------|------|------|---|---|
| ATOM | 15409 | CB  | SER | A | 272 | -45.005 | -20.605 | -75.673 | 1.00 | 0.00 | D | C |
| ATOM | 15410 | OG  | SER | A | 272 | -44.614 | -19.547 | -76.535 | 1.00 | 0.00 | D | O |
| ATOM | 15411 | C   | SER | A | 272 | -45.463 | -21.286 | -73.389 | 1.00 | 0.00 | D | C |
| ATOM | 15412 | O   | SER | A | 272 | -46.655 | -21.321 | -73.079 | 1.00 | 0.00 | D | O |
| ATOM | 15413 | N   | TRP | A | 273 | -44.603 | -22.265 | -73.058 | 1.00 | 0.00 | D | N |
| ATOM | 15414 | CA  | TRP | A | 273 | -45.054 | -23.467 | -72.407 | 1.00 | 0.00 | D | C |
| ATOM | 15415 | CB  | TRP | A | 273 | -43.969 | -24.547 | -72.364 | 1.00 | 0.00 | D | C |
| ATOM | 15416 | CG  | TRP | A | 273 | -43.650 | -25.046 | -73.751 | 1.00 | 0.00 | D | C |
| ATOM | 15417 | CD1 | TRP | A | 273 | -42.725 | -24.578 | -74.640 | 1.00 | 0.00 | D | C |
| ATOM | 15418 | NE1 | TRP | A | 273 | -42.796 | -25.300 | -75.807 | 1.00 | 0.00 | D | N |
| ATOM | 15419 | CE2 | TRP | A | 273 | -43.781 | -26.257 | -75.676 | 1.00 | 0.00 | D | C |
| ATOM | 15420 | CD2 | TRP | A | 273 | -44.333 | -26.123 | -74.401 | 1.00 | 0.00 | D | C |
| ATOM | 15421 | CE3 | TRP | A | 273 | -45.344 | -26.943 | -73.974 | 1.00 | 0.00 | D | C |
| ATOM | 15422 | CZ3 | TRP | A | 273 | -45.794 | -27.901 | -74.852 | 1.00 | 0.00 | D | C |
| ATOM | 15423 | CZ2 | TRP | A | 273 | -44.229 | -27.210 | -76.543 | 1.00 | 0.00 | D | C |
| ATOM | 15424 | CH2 | TRP | A | 273 | -45.246 | -28.032 | -76.114 | 1.00 | 0.00 | D | C |
| ATOM | 15425 | C   | TRP | A | 273 | -45.558 | -23.226 | -71.021 | 1.00 | 0.00 | D | C |
| ATOM | 15426 | O   | TRP | A | 273 | -46.689 | -23.592 | -70.704 | 1.00 | 0.00 | D | O |
| ATOM | 15427 | N   | GLN | A | 274 | -44.737 | -22.624 | -70.142 | 1.00 | 0.00 | D | N |
| ATOM | 15428 | CA  | GLN | A | 274 | -45.234 | -22.350 | -68.825 | 1.00 | 0.00 | D | C |
| ATOM | 15429 | CB  | GLN | A | 274 | -45.071 | -23.533 | -67.853 | 1.00 | 0.00 | D | C |
| ATOM | 15430 | CG  | GLN | A | 274 | -45.673 | -23.290 | -66.467 | 1.00 | 0.00 | D | C |
| ATOM | 15431 | CD  | GLN | A | 274 | -45.585 | -24.588 | -65.674 | 1.00 | 0.00 | D | C |
| ATOM | 15432 | OE1 | GLN | A | 274 | -45.077 | -25.599 | -66.158 | 1.00 | 0.00 | D | O |
| ATOM | 15433 | NE2 | GLN | A | 274 | -46.106 | -24.566 | -64.418 | 1.00 | 0.00 | D | N |
| ATOM | 15434 | C   | GLN | A | 274 | -44.452 | -21.190 | -68.301 | 1.00 | 0.00 | D | C |
| ATOM | 15435 | O   | GLN | A | 274 | -43.252 | -21.297 | -68.055 | 1.00 | 0.00 | D | O |
| ATOM | 15436 | N   | THR | A | 275 | -45.128 | -20.046 | -68.106 | 1.00 | 0.00 | D | N |
| ATOM | 15437 | CA  | THR | A | 275 | -44.442 | -18.886 | -67.627 | 1.00 | 0.00 | D | C |
| ATOM | 15438 | CB  | THR | A | 275 | -45.208 | -17.615 | -67.840 | 1.00 | 0.00 | D | C |
| ATOM | 15439 | OG1 | THR | A | 275 | -46.441 | -17.661 | -67.136 | 1.00 | 0.00 | D | O |
| ATOM | 15440 | CG2 | THR | A | 275 | -45.466 | -17.442 | -69.348 | 1.00 | 0.00 | D | C |
| ATOM | 15441 | C   | THR | A | 275 | -44.275 | -19.063 | -66.156 | 1.00 | 0.00 | D | C |
| ATOM | 15442 | O   | THR | A | 275 | -45.150 | -19.614 | -65.488 | 1.00 | 0.00 | D | O |
| ATOM | 15443 | N   | ALA | A | 276 | -43.132 | -18.605 | -65.616 | 1.00 | 0.00 | D | N |
| ATOM | 15444 | CA  | ALA | A | 276 | -42.903 | -18.748 | -64.213 | 1.00 | 0.00 | D | C |
| ATOM | 15445 | CB  | ALA | A | 276 | -41.439 | -18.498 | -63.799 | 1.00 | 0.00 | D | C |
| ATOM | 15446 | C   | ALA | A | 276 | -43.761 | -17.763 | -63.485 | 1.00 | 0.00 | D | C |

|      |       |     |           |         |         |         |      |      |   |   |
|------|-------|-----|-----------|---------|---------|---------|------|------|---|---|
| ATOM | 15447 | O   | ALA A 276 | -44.062 | -16.685 | -63.995 | 1.00 | 0.00 | D | O |
| ATOM | 15448 | N   | ASP A 277 | -44.197 | -18.142 | -62.267 | 1.00 | 0.00 | D | N |
| ATOM | 15449 | CA  | ASP A 277 | -44.949 | -17.253 | -61.433 | 1.00 | 0.00 | D | C |
| ATOM | 15450 | CB  | ASP A 277 | -45.723 | -17.977 | -60.310 | 1.00 | 0.00 | D | C |
| ATOM | 15451 | CG  | ASP A 277 | -46.509 | -16.967 | -59.478 | 1.00 | 0.00 | D | C |
| ATOM | 15452 | OD1 | ASP A 277 | -46.328 | -15.736 | -59.676 | 1.00 | 0.00 | D | O |
| ATOM | 15453 | OD2 | ASP A 277 | -47.308 | -17.427 | -58.618 | 1.00 | 0.00 | D | O |
| ATOM | 15454 | C   | ASP A 277 | -43.912 | -16.398 | -60.780 | 1.00 | 0.00 | D | C |
| ATOM | 15455 | O   | ASP A 277 | -43.150 | -16.857 | -59.933 | 1.00 | 0.00 | D | O |
| ATOM | 15456 | N   | ILE A 278 | -43.874 | -15.113 | -61.165 | 1.00 | 0.00 | D | N |
| ATOM | 15457 | CA  | ILE A 278 | -42.879 | -14.194 | -60.699 | 1.00 | 0.00 | D | C |
| ATOM | 15458 | CB  | ILE A 278 | -42.975 | -12.852 | -61.364 | 1.00 | 0.00 | D | C |
| ATOM | 15459 | CG2 | ILE A 278 | -44.295 | -12.191 | -60.923 | 1.00 | 0.00 | D | C |
| ATOM | 15460 | CG1 | ILE A 278 | -41.720 | -12.013 | -61.064 | 1.00 | 0.00 | D | C |
| ATOM | 15461 | CD  | ILE A 278 | -40.449 | -12.562 | -61.706 | 1.00 | 0.00 | D | C |
| ATOM | 15462 | C   | ILE A 278 | -42.973 | -13.985 | -59.212 | 1.00 | 0.00 | D | C |
| ATOM | 15463 | O   | ILE A 278 | -41.973 | -13.672 | -58.571 | 1.00 | 0.00 | D | O |
| ATOM | 15464 | N   | SER A 279 | -44.195 | -14.020 | -58.648 | 1.00 | 0.00 | D | N |
| ATOM | 15465 | CA  | SER A 279 | -44.441 | -13.768 | -57.249 | 1.00 | 0.00 | D | C |
| ATOM | 15466 | CB  | SER A 279 | -45.833 | -13.157 | -57.007 | 1.00 | 0.00 | D | C |
| ATOM | 15467 | OG  | SER A 279 | -46.846 | -14.083 | -57.370 | 1.00 | 0.00 | D | O |
| ATOM | 15468 | C   | SER A 279 | -44.319 | -14.964 | -56.343 | 1.00 | 0.00 | D | C |
| ATOM | 15469 | O   | SER A 279 | -44.508 | -14.822 | -55.137 | 1.00 | 0.00 | D | O |
| ATOM | 15470 | N   | ALA A 280 | -44.025 | -16.174 | -56.853 | 1.00 | 0.00 | D | N |
| ATOM | 15471 | CA  | ALA A 280 | -44.064 | -17.326 | -55.986 | 1.00 | 0.00 | D | C |
| ATOM | 15472 | CB  | ALA A 280 | -43.724 | -18.643 | -56.705 | 1.00 | 0.00 | D | C |
| ATOM | 15473 | C   | ALA A 280 | -43.107 | -17.179 | -54.838 | 1.00 | 0.00 | D | C |
| ATOM | 15474 | O   | ALA A 280 | -42.080 | -16.510 | -54.931 | 1.00 | 0.00 | D | O |
| ATOM | 15475 | N   | ARG A 281 | -43.463 | -17.797 | -53.690 | 1.00 | 0.00 | D | N |
| ATOM | 15476 | CA  | ARG A 281 | -42.617 | -17.762 | -52.531 | 1.00 | 0.00 | D | C |
| ATOM | 15477 | CB  | ARG A 281 | -43.245 | -17.028 | -51.333 | 1.00 | 0.00 | D | C |
| ATOM | 15478 | CG  | ARG A 281 | -44.652 | -17.499 | -50.972 | 1.00 | 0.00 | D | C |
| ATOM | 15479 | CD  | ARG A 281 | -45.716 | -16.902 | -51.900 | 1.00 | 0.00 | D | C |
| ATOM | 15480 | NE  | ARG A 281 | -47.061 | -17.203 | -51.333 | 1.00 | 0.00 | D | N |
| ATOM | 15481 | CZ  | ARG A 281 | -47.643 | -16.334 | -50.456 | 1.00 | 0.00 | D | C |
| ATOM | 15482 | NH1 | ARG A 281 | -46.988 | -15.193 | -50.086 | 1.00 | 0.00 | D | N |
| ATOM | 15483 | NH2 | ARG A 281 | -48.883 | -16.600 | -49.949 | 1.00 | 0.00 | D | N |
| ATOM | 15484 | C   | ARG A 281 | -42.224 | -19.161 | -52.158 | 1.00 | 0.00 | D | C |

|      |       |     |           |         |         |         |      |      |   |   |
|------|-------|-----|-----------|---------|---------|---------|------|------|---|---|
| ATOM | 15485 | O   | ARG A 281 | -43.000 | -20.101 | -52.302 | 1.00 | 0.00 | D | O |
| ATOM | 15486 | N   | ASP A 282 | -40.965 | -19.326 | -51.691 | 1.00 | 0.00 | D | N |
| ATOM | 15487 | CA  | ASP A 282 | -40.466 | -20.627 | -51.337 | 1.00 | 0.00 | D | C |
| ATOM | 15488 | CB  | ASP A 282 | -38.947 | -20.804 | -51.502 | 1.00 | 0.00 | D | C |
| ATOM | 15489 | CG  | ASP A 282 | -38.179 | -19.836 | -50.618 | 1.00 | 0.00 | D | C |
| ATOM | 15490 | OD1 | ASP A 282 | -38.763 | -19.256 | -49.664 | 1.00 | 0.00 | D | O |
| ATOM | 15491 | OD2 | ASP A 282 | -36.965 | -19.672 | -50.905 | 1.00 | 0.00 | D | O |
| ATOM | 15492 | C   | ASP A 282 | -40.893 | -20.955 | -49.940 | 1.00 | 0.00 | D | C |
| ATOM | 15493 | O   | ASP A 282 | -41.679 | -20.230 | -49.334 | 1.00 | 0.00 | D | O |
| ATOM | 15494 | N   | SER A 283 | -40.361 | -22.062 | -49.381 | 1.00 | 0.00 | D | N |
| ATOM | 15495 | CA  | SER A 283 | -40.802 | -22.555 | -48.106 | 1.00 | 0.00 | D | C |
| ATOM | 15496 | CB  | SER A 283 | -39.969 | -23.747 | -47.611 | 1.00 | 0.00 | D | C |
| ATOM | 15497 | OG  | SER A 283 | -40.128 | -24.850 | -48.493 | 1.00 | 0.00 | D | O |
| ATOM | 15498 | C   | SER A 283 | -40.678 | -21.476 | -47.069 | 1.00 | 0.00 | D | C |
| ATOM | 15499 | O   | SER A 283 | -41.531 | -21.350 | -46.190 | 1.00 | 0.00 | D | O |
| ATOM | 15500 | N   | VAL A 284 | -39.594 | -20.692 | -47.155 | 1.00 | 0.00 | D | N |
| ATOM | 15501 | CA  | VAL A 284 | -39.261 | -19.609 | -46.272 | 1.00 | 0.00 | D | C |
| ATOM | 15502 | CB  | VAL A 284 | -37.871 | -19.095 | -46.516 | 1.00 | 0.00 | D | C |
| ATOM | 15503 | CG1 | VAL A 284 | -37.636 | -17.849 | -45.645 | 1.00 | 0.00 | D | C |
| ATOM | 15504 | CG2 | VAL A 284 | -36.875 | -20.237 | -46.249 | 1.00 | 0.00 | D | C |
| ATOM | 15505 | C   | VAL A 284 | -40.214 | -18.462 | -46.457 | 1.00 | 0.00 | D | C |
| ATOM | 15506 | O   | VAL A 284 | -40.376 | -17.639 | -45.558 | 1.00 | 0.00 | D | O |
| ATOM | 15507 | N   | GLY A 285 | -40.845 | -18.338 | -47.641 | 1.00 | 0.00 | D | N |
| ATOM | 15508 | CA  | GLY A 285 | -41.725 | -17.228 | -47.881 | 1.00 | 0.00 | D | C |
| ATOM | 15509 | C   | GLY A 285 | -40.991 | -16.270 | -48.762 | 1.00 | 0.00 | D | C |
| ATOM | 15510 | O   | GLY A 285 | -41.521 | -15.236 | -49.163 | 1.00 | 0.00 | D | O |
| ATOM | 15511 | N   | ASN A 286 | -39.732 | -16.608 | -49.094 | 1.00 | 0.00 | D | N |
| ATOM | 15512 | CA  | ASN A 286 | -38.929 | -15.730 | -49.893 | 1.00 | 0.00 | D | C |
| ATOM | 15513 | CB  | ASN A 286 | -37.417 | -15.997 | -49.765 | 1.00 | 0.00 | D | C |
| ATOM | 15514 | CG  | ASN A 286 | -36.980 | -15.561 | -48.374 | 1.00 | 0.00 | D | C |
| ATOM | 15515 | OD1 | ASN A 286 | -37.656 | -14.774 | -47.714 | 1.00 | 0.00 | D | O |
| ATOM | 15516 | ND2 | ASN A 286 | -35.808 | -16.080 | -47.920 | 1.00 | 0.00 | D | N |
| ATOM | 15517 | C   | ASN A 286 | -39.275 | -15.839 | -51.340 | 1.00 | 0.00 | D | C |
| ATOM | 15518 | O   | ASN A 286 | -39.515 | -16.923 | -51.872 | 1.00 | 0.00 | D | O |
| ATOM | 15519 | N   | THR A 287 | -39.315 | -14.671 | -52.010 | 1.00 | 0.00 | D | N |
| ATOM | 15520 | CA  | THR A 287 | -39.514 | -14.603 | -53.426 | 1.00 | 0.00 | D | C |
| ATOM | 15521 | CB  | THR A 287 | -40.360 | -13.439 | -53.855 | 1.00 | 0.00 | D | C |
| ATOM | 15522 | OG1 | THR A 287 | -39.730 | -12.221 | -53.494 | 1.00 | 0.00 | D | O |

|      |       |               |         |         |         |      |      |   |   |
|------|-------|---------------|---------|---------|---------|------|------|---|---|
| ATOM | 15523 | CG2 THR A 287 | -41.740 | -13.552 | -53.179 | 1.00 | 0.00 | D | C |
| ATOM | 15524 | C THR A 287   | -38.147 | -14.432 | -54.015 | 1.00 | 0.00 | D | C |
| ATOM | 15525 | O THR A 287   | -37.148 | -14.434 | -53.292 | 1.00 | 0.00 | D | O |
| ATOM | 15526 | N VAL A 288   | -38.073 | -14.270 | -55.351 | 1.00 | 0.00 | D | N |
| ATOM | 15527 | CA VAL A 288  | -36.803 | -14.131 | -56.009 | 1.00 | 0.00 | D | C |
| ATOM | 15528 | CB VAL A 288  | -36.896 | -13.993 | -57.505 | 1.00 | 0.00 | D | C |
| ATOM | 15529 | CG1 VAL A 288 | -37.418 | -15.313 | -58.086 | 1.00 | 0.00 | D | C |
| ATOM | 15530 | CG2 VAL A 288 | -37.776 | -12.784 | -57.852 | 1.00 | 0.00 | D | C |
| ATOM | 15531 | C VAL A 288   | -36.115 | -12.920 | -55.470 | 1.00 | 0.00 | D | C |
| ATOM | 15532 | O VAL A 288   | -34.890 | -12.905 | -55.345 | 1.00 | 0.00 | D | O |
| ATOM | 15533 | N LEU A 289   | -36.884 | -11.858 | -55.171 | 1.00 | 0.00 | D | N |
| ATOM | 15534 | CA LEU A 289  | -36.297 | -10.670 | -54.623 | 1.00 | 0.00 | D | C |
| ATOM | 15535 | CB LEU A 289  | -37.324 | -9.539  | -54.443 | 1.00 | 0.00 | D | C |
| ATOM | 15536 | CG LEU A 289  | -37.975 | -9.101  | -55.773 | 1.00 | 0.00 | D | C |
| ATOM | 15537 | CD1 LEU A 289 | -38.899 | -7.887  | -55.577 | 1.00 | 0.00 | D | C |
| ATOM | 15538 | CD2 LEU A 289 | -36.922 | -8.889  | -56.873 | 1.00 | 0.00 | D | C |
| ATOM | 15539 | C LEU A 289   | -35.714 | -11.011 | -53.280 | 1.00 | 0.00 | D | C |
| ATOM | 15540 | O LEU A 289   | -34.588 | -10.627 | -52.966 | 1.00 | 0.00 | D | O |
| ATOM | 15541 | N HSD A 290   | -36.452 | -11.771 | -52.445 | 1.00 | 0.00 | D | N |
| ATOM | 15542 | CA HSD A 290  | -35.926 | -12.109 | -51.151 | 1.00 | 0.00 | D | C |
| ATOM | 15543 | CB HSD A 290  | -36.898 | -12.927 | -50.283 | 1.00 | 0.00 | D | C |
| ATOM | 15544 | ND1 HSD A 290 | -38.063 | -11.099 | -48.958 | 1.00 | 0.00 | D | N |
| ATOM | 15545 | CG HSD A 290  | -38.103 | -12.151 | -49.845 | 1.00 | 0.00 | D | C |
| ATOM | 15546 | CE1 HSD A 290 | -39.341 | -10.670 | -48.799 | 1.00 | 0.00 | D | C |
| ATOM | 15547 | NE2 HSD A 290 | -40.196 | -11.371 | -49.519 | 1.00 | 0.00 | D | N |
| ATOM | 15548 | CD2 HSD A 290 | -39.414 | -12.304 | -50.179 | 1.00 | 0.00 | D | C |
| ATOM | 15549 | C HSD A 290   | -34.677 | -12.936 | -51.306 | 1.00 | 0.00 | D | C |
| ATOM | 15550 | O HSD A 290   | -33.673 | -12.696 | -50.636 | 1.00 | 0.00 | D | O |
| ATOM | 15551 | N ALA A 291   | -34.694 | -13.924 | -52.218 | 1.00 | 0.00 | D | N |
| ATOM | 15552 | CA ALA A 291  | -33.575 | -14.819 | -52.376 | 1.00 | 0.00 | D | C |
| ATOM | 15553 | CB ALA A 291  | -33.811 | -15.894 | -53.451 | 1.00 | 0.00 | D | C |
| ATOM | 15554 | C ALA A 291   | -32.349 | -14.049 | -52.774 | 1.00 | 0.00 | D | C |
| ATOM | 15555 | O ALA A 291   | -31.250 | -14.346 | -52.304 | 1.00 | 0.00 | D | O |
| ATOM | 15556 | N LEU A 292   | -32.503 | -13.040 | -53.653 | 1.00 | 0.00 | D | N |
| ATOM | 15557 | CA LEU A 292  | -31.394 | -12.260 | -54.130 | 1.00 | 0.00 | D | C |
| ATOM | 15558 | CB LEU A 292  | -31.821 | -11.198 | -55.156 | 1.00 | 0.00 | D | C |
| ATOM | 15559 | CG LEU A 292  | -32.201 | -11.790 | -56.525 | 1.00 | 0.00 | D | C |
| ATOM | 15560 | CD1 LEU A 292 | -32.627 | -10.690 | -57.510 | 1.00 | 0.00 | D | C |

ATOM 15561 CD2 LEU A 292 -31.052 -12.652 -57.079 1.00 0.00 D C  
ATOM 15562 C LEU A 292 -30.754 -11.554 -52.976 1.00 0.00 D C  
ATOM 15563 O LEU A 292 -29.530 -11.495 -52.875 1.00 0.00 D O  
ATOM 15564 N VAL A 293 -31.575 -11.000 -52.065 1.00 0.00 D N  
ATOM 15565 CA VAL A 293 -31.075 -10.306 -50.916 1.00 0.00 D C  
ATOM 15566 CB VAL A 293 -32.175 -9.772 -50.047 1.00 0.00 D C  
ATOM 15567 CG1 VAL A 293 -31.553 -9.182 -48.769 1.00 0.00 D C  
ATOM 15568 CG2 VAL A 293 -32.995 -8.756 -50.860 1.00 0.00 D C  
ATOM 15569 C VAL A 293 -30.283 -11.281 -50.101 1.00 0.00 D C  
ATOM 15570 O VAL A 293 -29.249 -10.936 -49.537 1.00 0.00 D O  
ATOM 15571 N GLU A 294 -30.760 -12.535 -50.012 1.00 0.00 D N  
ATOM 15572 CA GLU A 294 -30.104 -13.532 -49.214 1.00 0.00 D C  
ATOM 15573 CB GLU A 294 -30.926 -14.826 -49.078 1.00 0.00 D C  
ATOM 15574 CG GLU A 294 -30.516 -15.647 -47.857 1.00 0.00 D C  
ATOM 15575 CD GLU A 294 -30.995 -14.866 -46.641 1.00 0.00 D C  
ATOM 15576 OE1 GLU A 294 -32.238 -14.726 -46.487 1.00 0.00 D O  
ATOM 15577 OE2 GLU A 294 -30.129 -14.388 -45.862 1.00 0.00 D O  
ATOM 15578 C GLU A 294 -28.769 -13.884 -49.803 1.00 0.00 D C  
ATOM 15579 O GLU A 294 -27.833 -14.223 -49.082 1.00 0.00 D O  
ATOM 15580 N VAL A 295 -28.662 -13.857 -51.145 1.00 0.00 D N  
ATOM 15581 CA VAL A 295 -27.471 -14.254 -51.846 1.00 0.00 D C  
ATOM 15582 CB VAL A 295 -27.690 -14.548 -53.306 1.00 0.00 D C  
ATOM 15583 CG1 VAL A 295 -27.801 -13.237 -54.098 1.00 0.00 D C  
ATOM 15584 CG2 VAL A 295 -26.564 -15.478 -53.786 1.00 0.00 D C  
ATOM 15585 C VAL A 295 -26.358 -13.243 -51.708 1.00 0.00 D C  
ATOM 15586 O VAL A 295 -25.195 -13.592 -51.908 1.00 0.00 D O  
ATOM 15587 N ALA A 296 -26.671 -11.955 -51.438 1.00 0.00 D N  
ATOM 15588 CA ALA A 296 -25.654 -10.930 -51.388 1.00 0.00 D C  
ATOM 15589 CB ALA A 296 -26.236 -9.510 -51.286 1.00 0.00 D C  
ATOM 15590 C ALA A 296 -24.703 -11.116 -50.230 1.00 0.00 D C  
ATOM 15591 O ALA A 296 -25.116 -11.413 -49.110 1.00 0.00 D O  
ATOM 15592 N ASP A 297 -23.382 -11.074 -50.531 1.00 0.00 D N  
ATOM 15593 CA ASP A 297 -22.282 -11.102 -49.592 1.00 0.00 D C  
ATOM 15594 CB ASP A 297 -21.146 -12.106 -49.893 1.00 0.00 D C  
ATOM 15595 CG ASP A 297 -20.383 -11.728 -51.138 1.00 0.00 D C  
ATOM 15596 OD1 ASP A 297 -21.044 -11.359 -52.134 1.00 0.00 D O  
ATOM 15597 OD2 ASP A 297 -19.126 -11.823 -51.120 1.00 0.00 D O  
ATOM 15598 C ASP A 297 -21.698 -9.752 -49.247 1.00 0.00 D C

|      |       |     |           |         |         |         |      |      |   |   |
|------|-------|-----|-----------|---------|---------|---------|------|------|---|---|
| ATOM | 15599 | O   | ASP A 297 | -20.769 | -9.680  | -48.442 | 1.00 | 0.00 | D | O |
| ATOM | 15600 | N   | ASN A 298 | -22.133 | -8.658  | -49.903 | 1.00 | 0.00 | D | N |
| ATOM | 15601 | CA  | ASN A 298 | -21.589 | -7.345  | -49.657 | 1.00 | 0.00 | D | C |
| ATOM | 15602 | CB  | ASN A 298 | -21.546 | -6.978  | -48.164 | 1.00 | 0.00 | D | C |
| ATOM | 15603 | CG  | ASN A 298 | -22.985 | -6.757  | -47.722 | 1.00 | 0.00 | D | C |
| ATOM | 15604 | OD1 | ASN A 298 | -23.740 | -6.044  | -48.383 | 1.00 | 0.00 | D | O |
| ATOM | 15605 | ND2 | ASN A 298 | -23.384 | -7.393  | -46.589 | 1.00 | 0.00 | D | N |
| ATOM | 15606 | C   | ASN A 298 | -20.219 | -7.176  | -50.242 | 1.00 | 0.00 | D | C |
| ATOM | 15607 | O   | ASN A 298 | -19.443 | -6.333  | -49.792 | 1.00 | 0.00 | D | O |
| ATOM | 15608 | N   | THR A 299 | -19.880 | -7.968  | -51.276 | 1.00 | 0.00 | D | N |
| ATOM | 15609 | CA  | THR A 299 | -18.662 | -7.717  | -51.986 | 1.00 | 0.00 | D | C |
| ATOM | 15610 | CB  | THR A 299 | -18.023 | -8.960  | -52.525 | 1.00 | 0.00 | D | C |
| ATOM | 15611 | OG1 | THR A 299 | -16.751 | -8.660  | -53.065 | 1.00 | 0.00 | D | O |
| ATOM | 15612 | CG2 | THR A 299 | -18.918 | -9.565  | -53.609 | 1.00 | 0.00 | D | C |
| ATOM | 15613 | C   | THR A 299 | -19.066 | -6.823  | -53.122 | 1.00 | 0.00 | D | C |
| ATOM | 15614 | O   | THR A 299 | -20.233 | -6.804  | -53.507 | 1.00 | 0.00 | D | O |
| ATOM | 15615 | N   | ALA A 300 | -18.121 | -6.054  | -53.697 | 1.00 | 0.00 | D | N |
| ATOM | 15616 | CA  | ALA A 300 | -18.476 | -5.099  | -54.712 | 1.00 | 0.00 | D | C |
| ATOM | 15617 | CB  | ALA A 300 | -17.270 | -4.280  | -55.208 | 1.00 | 0.00 | D | C |
| ATOM | 15618 | C   | ALA A 300 | -19.069 | -5.788  | -55.900 | 1.00 | 0.00 | D | C |
| ATOM | 15619 | O   | ALA A 300 | -20.076 | -5.341  | -56.449 | 1.00 | 0.00 | D | O |
| ATOM | 15620 | N   | ASP A 301 | -18.463 | -6.910  | -56.320 | 1.00 | 0.00 | D | N |
| ATOM | 15621 | CA  | ASP A 301 | -18.899 | -7.626  | -57.485 | 1.00 | 0.00 | D | C |
| ATOM | 15622 | CB  | ASP A 301 | -17.982 | -8.822  | -57.791 | 1.00 | 0.00 | D | C |
| ATOM | 15623 | CG  | ASP A 301 | -16.594 | -8.283  | -58.117 | 1.00 | 0.00 | D | C |
| ATOM | 15624 | OD1 | ASP A 301 | -16.510 | -7.270  | -58.864 | 1.00 | 0.00 | D | O |
| ATOM | 15625 | OD2 | ASP A 301 | -15.602 | -8.867  | -57.609 | 1.00 | 0.00 | D | O |
| ATOM | 15626 | C   | ASP A 301 | -20.273 | -8.169  | -57.243 | 1.00 | 0.00 | D | C |
| ATOM | 15627 | O   | ASP A 301 | -21.105 | -8.199  | -58.150 | 1.00 | 0.00 | D | O |
| ATOM | 15628 | N   | ASN A 302 | -20.527 | -8.638  | -56.006 | 1.00 | 0.00 | D | N |
| ATOM | 15629 | CA  | ASN A 302 | -21.773 | -9.259  | -55.656 | 1.00 | 0.00 | D | C |
| ATOM | 15630 | CB  | ASN A 302 | -21.777 | -9.793  | -54.228 | 1.00 | 0.00 | D | C |
| ATOM | 15631 | CG  | ASN A 302 | -23.119 | -10.436 | -53.928 | 1.00 | 0.00 | D | C |
| ATOM | 15632 | OD1 | ASN A 302 | -24.085 | -9.745  | -53.607 | 1.00 | 0.00 | D | O |
| ATOM | 15633 | ND2 | ASN A 302 | -23.191 | -11.788 | -54.031 | 1.00 | 0.00 | D | N |
| ATOM | 15634 | C   | ASN A 302 | -22.902 | -8.292  | -55.724 | 1.00 | 0.00 | D | C |
| ATOM | 15635 | O   | ASN A 302 | -23.944 | -8.598  | -56.303 | 1.00 | 0.00 | D | O |
| ATOM | 15636 | N   | THR A 303 | -22.724 | -7.095  | -55.137 | 1.00 | 0.00 | D | N |



|      |       |     |     |   |     |         |         |         |      |      |   |   |
|------|-------|-----|-----|---|-----|---------|---------|---------|------|------|---|---|
| ATOM | 15637 | CA  | THR | A | 303 | -23.806 | -6.160  | -55.131 | 1.00 | 0.00 | D | C |
| ATOM | 15638 | CB  | THR | A | 303 | -23.490 | -4.851  | -54.471 | 1.00 | 0.00 | D | C |
| ATOM | 15639 | OG1 | THR | A | 303 | -22.433 | -4.194  | -55.152 | 1.00 | 0.00 | D | O |
| ATOM | 15640 | CG2 | THR | A | 303 | -23.108 | -5.113  | -53.011 | 1.00 | 0.00 | D | C |
| ATOM | 15641 | C   | THR | A | 303 | -24.140 | -5.854  | -56.544 | 1.00 | 0.00 | D | C |
| ATOM | 15642 | O   | THR | A | 303 | -25.309 | -5.829  | -56.922 | 1.00 | 0.00 | D | O |
| ATOM | 15643 | N   | LYS | A | 304 | -23.107 | -5.668  | -57.382 | 1.00 | 0.00 | D | N |
| ATOM | 15644 | CA  | LYS | A | 304 | -23.346 | -5.245  | -58.726 | 1.00 | 0.00 | D | C |
| ATOM | 15645 | CB  | LYS | A | 304 | -22.058 | -5.134  | -59.564 | 1.00 | 0.00 | D | C |
| ATOM | 15646 | CG  | LYS | A | 304 | -21.100 | -4.054  | -59.058 | 1.00 | 0.00 | D | C |
| ATOM | 15647 | CD  | LYS | A | 304 | -21.712 | -2.652  | -59.025 | 1.00 | 0.00 | D | C |
| ATOM | 15648 | CE  | LYS | A | 304 | -20.802 | -1.594  | -58.396 | 1.00 | 0.00 | D | C |
| ATOM | 15649 | NZ  | LYS | A | 304 | -21.476 | -0.276  | -58.401 | 1.00 | 0.00 | D | N |
| ATOM | 15650 | C   | LYS | A | 304 | -24.243 | -6.224  | -59.420 | 1.00 | 0.00 | D | C |
| ATOM | 15651 | O   | LYS | A | 304 | -25.222 | -5.821  | -60.041 | 1.00 | 0.00 | D | O |
| ATOM | 15652 | N   | PHE | A | 305 | -23.952 | -7.537  | -59.337 | 1.00 | 0.00 | D | N |
| ATOM | 15653 | CA  | PHE | A | 305 | -24.771 | -8.451  | -60.083 | 1.00 | 0.00 | D | C |
| ATOM | 15654 | CB  | PHE | A | 305 | -24.163 | -9.857  | -60.288 | 1.00 | 0.00 | D | C |
| ATOM | 15655 | CG  | PHE | A | 305 | -24.276 | -10.681 | -59.057 | 1.00 | 0.00 | D | C |
| ATOM | 15656 | CD1 | PHE | A | 305 | -25.417 | -11.417 | -58.845 | 1.00 | 0.00 | D | C |
| ATOM | 15657 | CE1 | PHE | A | 305 | -25.554 | -12.197 | -57.723 | 1.00 | 0.00 | D | C |
| ATOM | 15658 | CZ  | PHE | A | 305 | -24.535 | -12.246 | -56.804 | 1.00 | 0.00 | D | C |
| ATOM | 15659 | CD2 | PHE | A | 305 | -23.255 | -10.739 | -58.138 | 1.00 | 0.00 | D | C |
| ATOM | 15660 | CE2 | PHE | A | 305 | -23.387 | -11.519 | -57.012 | 1.00 | 0.00 | D | C |
| ATOM | 15661 | C   | PHE | A | 305 | -26.145 | -8.583  | -59.477 | 1.00 | 0.00 | D | C |
| ATOM | 15662 | O   | PHE | A | 305 | -27.135 | -8.668  | -60.201 | 1.00 | 0.00 | D | O |
| ATOM | 15663 | N   | VAL | A | 306 | -26.248 | -8.626  | -58.133 | 1.00 | 0.00 | D | N |
| ATOM | 15664 | CA  | VAL | A | 306 | -27.532 | -8.796  | -57.500 | 1.00 | 0.00 | D | C |
| ATOM | 15665 | CB  | VAL | A | 306 | -27.431 | -8.940  | -56.010 | 1.00 | 0.00 | D | C |
| ATOM | 15666 | CG1 | VAL | A | 306 | -28.851 | -8.962  | -55.421 | 1.00 | 0.00 | D | C |
| ATOM | 15667 | CG2 | VAL | A | 306 | -26.619 | -10.211 | -55.705 | 1.00 | 0.00 | D | C |
| ATOM | 15668 | C   | VAL | A | 306 | -28.382 | -7.601  | -57.787 | 1.00 | 0.00 | D | C |
| ATOM | 15669 | O   | VAL | A | 306 | -29.559 | -7.722  | -58.123 | 1.00 | 0.00 | D | O |
| ATOM | 15670 | N   | THR | A | 307 | -27.771 | -6.408  | -57.702 | 1.00 | 0.00 | D | N |
| ATOM | 15671 | CA  | THR | A | 307 | -28.450 | -5.157  | -57.848 | 1.00 | 0.00 | D | C |
| ATOM | 15672 | CB  | THR | A | 307 | -27.472 | -4.016  | -57.776 | 1.00 | 0.00 | D | C |
| ATOM | 15673 | OG1 | THR | A | 307 | -26.950 | -3.894  | -56.462 | 1.00 | 0.00 | D | O |
| ATOM | 15674 | CG2 | THR | A | 307 | -28.129 | -2.722  | -58.260 | 1.00 | 0.00 | D | C |

|      |       |     |     |       |         |         |         |      |      |   |   |
|------|-------|-----|-----|-------|---------|---------|---------|------|------|---|---|
| ATOM | 15675 | C   | THR | A 307 | -29.166 | -5.076  | -59.164 | 1.00 | 0.00 | D | C |
| ATOM | 15676 | O   | THR | A 307 | -30.330 | -4.685  | -59.208 | 1.00 | 0.00 | D | O |
| ATOM | 15677 | N   | SER | A 308 | -28.476 | -5.421  | -60.263 | 1.00 | 0.00 | D | N |
| ATOM | 15678 | CA  | SER | A 308 | -29.010 | -5.349  | -61.597 | 1.00 | 0.00 | D | C |
| ATOM | 15679 | CB  | SER | A 308 | -27.912 | -5.499  | -62.659 | 1.00 | 0.00 | D | C |
| ATOM | 15680 | OG  | SER | A 308 | -28.479 | -5.424  | -63.953 | 1.00 | 0.00 | D | O |
| ATOM | 15681 | C   | SER | A 308 | -30.005 | -6.435  | -61.851 | 1.00 | 0.00 | D | C |
| ATOM | 15682 | O   | SER | A 308 | -30.995 | -6.230  | -62.551 | 1.00 | 0.00 | D | O |
| ATOM | 15683 | N   | MET | A 309 | -29.760 | -7.642  | -61.314 | 1.00 | 0.00 | D | N |
| ATOM | 15684 | CA  | MET | A 309 | -30.675 | -8.718  | -61.558 | 1.00 | 0.00 | D | C |
| ATOM | 15685 | CB  | MET | A 309 | -30.214 | -10.070 | -60.995 | 1.00 | 0.00 | D | C |
| ATOM | 15686 | CG  | MET | A 309 | -31.209 | -11.192 | -61.292 | 1.00 | 0.00 | D | C |
| ATOM | 15687 | SD  | MET | A 309 | -31.440 | -11.526 | -63.066 | 1.00 | 0.00 | D | S |
| ATOM | 15688 | CE  | MET | A 309 | -29.711 | -11.971 | -63.393 | 1.00 | 0.00 | D | C |
| ATOM | 15689 | C   | MET | A 309 | -31.971 | -8.357  | -60.913 | 1.00 | 0.00 | D | C |
| ATOM | 15690 | O   | MET | A 309 | -33.039 | -8.681  | -61.423 | 1.00 | 0.00 | D | O |
| ATOM | 15691 | N   | TYR | A 310 | -31.887 | -7.681  | -59.753 | 1.00 | 0.00 | D | N |
| ATOM | 15692 | CA  | TYR | A 310 | -33.040 | -7.246  | -59.021 | 1.00 | 0.00 | D | C |
| ATOM | 15693 | CB  | TYR | A 310 | -32.611 | -6.484  | -57.750 | 1.00 | 0.00 | D | C |
| ATOM | 15694 | CG  | TYR | A 310 | -33.766 | -6.143  | -56.863 | 1.00 | 0.00 | D | C |
| ATOM | 15695 | CD1 | TYR | A 310 | -34.233 | -7.055  | -55.947 | 1.00 | 0.00 | D | C |
| ATOM | 15696 | CE1 | TYR | A 310 | -35.284 | -6.752  | -55.114 | 1.00 | 0.00 | D | C |
| ATOM | 15697 | CZ  | TYR | A 310 | -35.882 | -5.516  | -55.188 | 1.00 | 0.00 | D | C |
| ATOM | 15698 | OH  | TYR | A 310 | -36.961 | -5.198  | -54.335 | 1.00 | 0.00 | D | O |
| ATOM | 15699 | CD2 | TYR | A 310 | -34.368 | -4.905  | -56.924 | 1.00 | 0.00 | D | C |
| ATOM | 15700 | CE2 | TYR | A 310 | -35.421 | -4.594  | -56.095 | 1.00 | 0.00 | D | C |
| ATOM | 15701 | C   | TYR | A 310 | -33.787 | -6.296  | -59.913 | 1.00 | 0.00 | D | C |
| ATOM | 15702 | O   | TYR | A 310 | -34.994 | -6.428  | -60.108 | 1.00 | 0.00 | D | O |
| ATOM | 15703 | N   | ASN | A 311 | -33.061 | -5.341  | -60.527 | 1.00 | 0.00 | D | N |
| ATOM | 15704 | CA  | ASN | A 311 | -33.667 | -4.355  | -61.373 | 1.00 | 0.00 | D | C |
| ATOM | 15705 | CB  | ASN | A 311 | -32.646 | -3.381  | -61.980 | 1.00 | 0.00 | D | C |
| ATOM | 15706 | CG  | ASN | A 311 | -33.428 | -2.288  | -62.693 | 1.00 | 0.00 | D | C |
| ATOM | 15707 | OD1 | ASN | A 311 | -34.656 | -2.252  | -62.638 | 1.00 | 0.00 | D | O |
| ATOM | 15708 | ND2 | ASN | A 311 | -32.699 | -1.380  | -63.393 | 1.00 | 0.00 | D | N |
| ATOM | 15709 | C   | ASN | A 311 | -34.337 | -5.060  | -62.506 | 1.00 | 0.00 | D | C |
| ATOM | 15710 | O   | ASN | A 311 | -35.447 | -4.710  | -62.903 | 1.00 | 0.00 | D | O |
| ATOM | 15711 | N   | GLU | A 312 | -33.670 | -6.094  | -63.045 | 1.00 | 0.00 | D | N |
| ATOM | 15712 | CA  | GLU | A 312 | -34.180 | -6.820  | -64.169 | 1.00 | 0.00 | D | C |

|      |       |     |     |   |     |         |         |         |      |      |   |   |
|------|-------|-----|-----|---|-----|---------|---------|---------|------|------|---|---|
| ATOM | 15713 | CB  | GLU | A | 312 | -33.239 | -7.948  | -64.621 | 1.00 | 0.00 | D | C |
| ATOM | 15714 | CG  | GLU | A | 312 | -32.032 | -7.446  | -65.407 | 1.00 | 0.00 | D | C |
| ATOM | 15715 | CD  | GLU | A | 312 | -32.571 | -6.960  | -66.743 | 1.00 | 0.00 | D | C |
| ATOM | 15716 | OE1 | GLU | A | 312 | -33.563 | -7.564  | -67.226 | 1.00 | 0.00 | D | O |
| ATOM | 15717 | OE2 | GLU | A | 312 | -32.007 | -5.977  | -67.293 | 1.00 | 0.00 | D | O |
| ATOM | 15718 | C   | GLU | A | 312 | -35.480 | -7.460  | -63.813 | 1.00 | 0.00 | D | C |
| ATOM | 15719 | O   | GLU | A | 312 | -36.410 | -7.455  | -64.614 | 1.00 | 0.00 | D | O |
| ATOM | 15720 | N   | ILE | A | 313 | -35.592 | -8.026  | -62.600 | 1.00 | 0.00 | D | N |
| ATOM | 15721 | CA  | ILE | A | 313 | -36.797 | -8.706  | -62.227 | 1.00 | 0.00 | D | C |
| ATOM | 15722 | CB  | ILE | A | 313 | -36.715 | -9.315  | -60.857 | 1.00 | 0.00 | D | C |
| ATOM | 15723 | CG2 | ILE | A | 313 | -38.127 | -9.767  | -60.456 | 1.00 | 0.00 | D | C |
| ATOM | 15724 | CG1 | ILE | A | 313 | -35.669 | -10.446 | -60.824 | 1.00 | 0.00 | D | C |
| ATOM | 15725 | CD  | ILE | A | 313 | -36.005 | -11.615 | -61.748 | 1.00 | 0.00 | D | C |
| ATOM | 15726 | C   | ILE | A | 313 | -37.928 | -7.730  | -62.215 | 1.00 | 0.00 | D | C |
| ATOM | 15727 | O   | ILE | A | 313 | -39.013 | -8.023  | -62.711 | 1.00 | 0.00 | D | O |
| ATOM | 15728 | N   | LEU | A | 314 | -37.700 | -6.532  | -61.642 | 1.00 | 0.00 | D | N |
| ATOM | 15729 | CA  | LEU | A | 314 | -38.758 | -5.570  | -61.545 | 1.00 | 0.00 | D | C |
| ATOM | 15730 | CB  | LEU | A | 314 | -38.393 | -4.332  | -60.708 | 1.00 | 0.00 | D | C |
| ATOM | 15731 | CG  | LEU | A | 314 | -38.235 | -4.638  | -59.205 | 1.00 | 0.00 | D | C |
| ATOM | 15732 | CD1 | LEU | A | 314 | -37.964 | -3.358  | -58.400 | 1.00 | 0.00 | D | C |
| ATOM | 15733 | CD2 | LEU | A | 314 | -39.437 | -5.430  | -58.664 | 1.00 | 0.00 | D | C |
| ATOM | 15734 | C   | LEU | A | 314 | -39.193 | -5.122  | -62.911 | 1.00 | 0.00 | D | C |
| ATOM | 15735 | O   | LEU | A | 314 | -40.389 | -5.024  | -63.180 | 1.00 | 0.00 | D | O |
| ATOM | 15736 | N   | MET | A | 315 | -38.239 | -4.880  | -63.831 | 1.00 | 0.00 | D | N |
| ATOM | 15737 | CA  | MET | A | 315 | -38.586 | -4.407  | -65.141 | 1.00 | 0.00 | D | C |
| ATOM | 15738 | CB  | MET | A | 315 | -37.349 | -4.211  | -66.037 | 1.00 | 0.00 | D | C |
| ATOM | 15739 | CG  | MET | A | 315 | -36.397 | -3.131  | -65.518 | 1.00 | 0.00 | D | C |
| ATOM | 15740 | SD  | MET | A | 315 | -34.922 | -2.864  | -66.545 | 1.00 | 0.00 | D | S |
| ATOM | 15741 | CE  | MET | A | 315 | -34.169 | -4.468  | -66.144 | 1.00 | 0.00 | D | C |
| ATOM | 15742 | C   | MET | A | 315 | -39.468 | -5.434  | -65.782 | 1.00 | 0.00 | D | C |
| ATOM | 15743 | O   | MET | A | 315 | -40.428 | -5.104  | -66.473 | 1.00 | 0.00 | D | O |
| ATOM | 15744 | N   | LEU | A | 316 | -39.144 | -6.720  | -65.584 | 1.00 | 0.00 | D | N |
| ATOM | 15745 | CA  | LEU | A | 316 | -39.923 | -7.801  | -66.122 | 1.00 | 0.00 | D | C |
| ATOM | 15746 | CB  | LEU | A | 316 | -39.239 | -9.175  | -65.966 | 1.00 | 0.00 | D | C |
| ATOM | 15747 | CG  | LEU | A | 316 | -38.154 | -9.487  | -67.024 | 1.00 | 0.00 | D | C |
| ATOM | 15748 | CD1 | LEU | A | 316 | -37.062 | -8.412  | -67.091 | 1.00 | 0.00 | D | C |
| ATOM | 15749 | CD2 | LEU | A | 316 | -37.558 | -10.889 | -66.807 | 1.00 | 0.00 | D | C |
| ATOM | 15750 | C   | LEU | A | 316 | -41.273 | -7.849  | -65.467 | 1.00 | 0.00 | D | C |

|      |       |     |           |         |         |         |      |      |   |   |
|------|-------|-----|-----------|---------|---------|---------|------|------|---|---|
| ATOM | 15751 | O   | LEU A 316 | -42.274 | -8.134  | -66.124 | 1.00 | 0.00 | D | O |
| ATOM | 15752 | N   | GLY A 317 | -41.337 | -7.595  | -64.147 | 1.00 | 0.00 | D | N |
| ATOM | 15753 | CA  | GLY A 317 | -42.606 | -7.654  | -63.477 | 1.00 | 0.00 | D | C |
| ATOM | 15754 | C   | GLY A 317 | -43.507 | -6.607  | -64.052 | 1.00 | 0.00 | D | C |
| ATOM | 15755 | O   | GLY A 317 | -44.665 | -6.874  | -64.367 | 1.00 | 0.00 | D | O |
| ATOM | 15756 | N   | ALA A 318 | -42.985 | -5.378  | -64.219 | 1.00 | 0.00 | D | N |
| ATOM | 15757 | CA  | ALA A 318 | -43.791 | -4.296  | -64.700 | 1.00 | 0.00 | D | C |
| ATOM | 15758 | CB  | ALA A 318 | -43.035 | -2.957  | -64.711 | 1.00 | 0.00 | D | C |
| ATOM | 15759 | C   | ALA A 318 | -44.246 | -4.576  | -66.097 | 1.00 | 0.00 | D | C |
| ATOM | 15760 | O   | ALA A 318 | -45.397 | -4.317  | -66.442 | 1.00 | 0.00 | D | O |
| ATOM | 15761 | N   | LYS A 319 | -43.354 | -5.083  | -66.966 | 1.00 | 0.00 | D | N |
| ATOM | 15762 | CA  | LYS A 319 | -43.813 | -5.315  | -68.302 | 1.00 | 0.00 | D | C |
| ATOM | 15763 | CB  | LYS A 319 | -42.675 | -5.611  | -69.301 | 1.00 | 0.00 | D | C |
| ATOM | 15764 | CG  | LYS A 319 | -41.771 | -6.793  | -68.952 | 1.00 | 0.00 | D | C |
| ATOM | 15765 | CD  | LYS A 319 | -40.880 | -7.223  | -70.119 | 1.00 | 0.00 | D | C |
| ATOM | 15766 | CE  | LYS A 319 | -39.958 | -8.398  | -69.800 | 1.00 | 0.00 | D | C |
| ATOM | 15767 | NZ  | LYS A 319 | -39.099 | -8.684  | -70.971 | 1.00 | 0.00 | D | N |
| ATOM | 15768 | C   | LYS A 319 | -44.831 | -6.421  | -68.351 | 1.00 | 0.00 | D | C |
| ATOM | 15769 | O   | LYS A 319 | -45.916 | -6.235  | -68.902 | 1.00 | 0.00 | D | O |
| ATOM | 15770 | N   | LEU A 320 | -44.519 | -7.600  | -67.776 | 1.00 | 0.00 | D | N |
| ATOM | 15771 | CA  | LEU A 320 | -45.422 | -8.717  | -67.857 | 1.00 | 0.00 | D | C |
| ATOM | 15772 | CB  | LEU A 320 | -44.758 | -10.062 | -67.496 | 1.00 | 0.00 | D | C |
| ATOM | 15773 | CG  | LEU A 320 | -43.780 | -10.574 | -68.579 | 1.00 | 0.00 | D | C |
| ATOM | 15774 | CD1 | LEU A 320 | -42.596 | -9.618  | -68.781 | 1.00 | 0.00 | D | C |
| ATOM | 15775 | CD2 | LEU A 320 | -43.318 | -12.013 | -68.300 | 1.00 | 0.00 | D | C |
| ATOM | 15776 | C   | LEU A 320 | -46.662 | -8.553  | -67.023 | 1.00 | 0.00 | D | C |
| ATOM | 15777 | O   | LEU A 320 | -47.764 | -8.769  | -67.525 | 1.00 | 0.00 | D | O |
| ATOM | 15778 | N   | HSD A 321 | -46.536 | -8.166  | -65.735 | 1.00 | 0.00 | D | N |
| ATOM | 15779 | CA  | HSD A 321 | -47.719 | -8.062  | -64.914 | 1.00 | 0.00 | D | C |
| ATOM | 15780 | CB  | HSD A 321 | -47.846 | -9.236  | -63.931 | 1.00 | 0.00 | D | C |
| ATOM | 15781 | ND1 | HSD A 321 | -48.864 | -11.174 | -65.224 | 1.00 | 0.00 | D | N |
| ATOM | 15782 | CG  | HSD A 321 | -47.780 | -10.555 | -64.645 | 1.00 | 0.00 | D | C |
| ATOM | 15783 | CE1 | HSD A 321 | -48.404 | -12.315 | -65.793 | 1.00 | 0.00 | D | C |
| ATOM | 15784 | NE2 | HSD A 321 | -47.103 | -12.474 | -65.621 | 1.00 | 0.00 | D | N |
| ATOM | 15785 | CD2 | HSD A 321 | -46.712 | -11.363 | -64.896 | 1.00 | 0.00 | D | C |
| ATOM | 15786 | C   | HSD A 321 | -47.602 | -6.803  | -64.104 | 1.00 | 0.00 | D | C |
| ATOM | 15787 | O   | HSD A 321 | -47.030 | -6.803  | -63.015 | 1.00 | 0.00 | D | O |
| ATOM | 15788 | N   | PRO A 322 | -48.158 | -5.736  | -64.603 | 1.00 | 0.00 | D | N |

|      |       |     |           |         |         |         |      |      |   |   |
|------|-------|-----|-----------|---------|---------|---------|------|------|---|---|
| ATOM | 15789 | CD  | PRO A 322 | -48.424 | -5.619  | -66.024 | 1.00 | 0.00 | D | C |
| ATOM | 15790 | CA  | PRO A 322 | -48.024 | -4.449  | -63.972 | 1.00 | 0.00 | D | C |
| ATOM | 15791 | CB  | PRO A 322 | -48.428 | -3.416  | -65.031 | 1.00 | 0.00 | D | C |
| ATOM | 15792 | CG  | PRO A 322 | -49.073 | -4.235  | -66.165 | 1.00 | 0.00 | D | C |
| ATOM | 15793 | C   | PRO A 322 | -48.712 | -4.261  | -62.658 | 1.00 | 0.00 | D | C |
| ATOM | 15794 | O   | PRO A 322 | -48.276 | -3.412  | -61.883 | 1.00 | 0.00 | D | O |
| ATOM | 15795 | N   | THR A 323 | -49.780 | -5.024  | -62.385 | 1.00 | 0.00 | D | N |
| ATOM | 15796 | CA  | THR A 323 | -50.565 | -4.823  | -61.205 | 1.00 | 0.00 | D | C |
| ATOM | 15797 | CB  | THR A 323 | -51.786 | -5.685  | -61.182 | 1.00 | 0.00 | D | C |
| ATOM | 15798 | OG1 | THR A 323 | -52.559 | -5.463  | -62.351 | 1.00 | 0.00 | D | O |
| ATOM | 15799 | CG2 | THR A 323 | -52.604 | -5.313  | -59.937 | 1.00 | 0.00 | D | C |
| ATOM | 15800 | C   | THR A 323 | -49.781 | -5.153  | -59.973 | 1.00 | 0.00 | D | C |
| ATOM | 15801 | O   | THR A 323 | -49.937 | -4.498  | -58.942 | 1.00 | 0.00 | D | O |
| ATOM | 15802 | N   | LEU A 324 | -48.915 | -6.179  | -60.052 | 1.00 | 0.00 | D | N |
| ATOM | 15803 | CA  | LEU A 324 | -48.269 | -6.708  | -58.883 | 1.00 | 0.00 | D | C |
| ATOM | 15804 | CB  | LEU A 324 | -47.506 | -8.009  | -59.170 | 1.00 | 0.00 | D | C |
| ATOM | 15805 | CG  | LEU A 324 | -48.363 | -9.090  | -59.852 | 1.00 | 0.00 | D | C |
| ATOM | 15806 | CD1 | LEU A 324 | -47.630 | -10.439 | -59.859 | 1.00 | 0.00 | D | C |
| ATOM | 15807 | CD2 | LEU A 324 | -49.778 | -9.163  | -59.265 | 1.00 | 0.00 | D | C |
| ATOM | 15808 | C   | LEU A 324 | -47.280 | -5.748  | -58.296 | 1.00 | 0.00 | D | C |
| ATOM | 15809 | O   | LEU A 324 | -46.423 | -5.208  | -58.991 | 1.00 | 0.00 | D | O |
| ATOM | 15810 | N   | LYS A 325 | -47.383 | -5.521  | -56.966 | 1.00 | 0.00 | D | N |
| ATOM | 15811 | CA  | LYS A 325 | -46.394 | -4.728  | -56.295 | 1.00 | 0.00 | D | C |
| ATOM | 15812 | CB  | LYS A 325 | -46.947 | -3.763  | -55.228 | 1.00 | 0.00 | D | C |
| ATOM | 15813 | CG  | LYS A 325 | -47.654 | -2.546  | -55.832 | 1.00 | 0.00 | D | C |
| ATOM | 15814 | CD  | LYS A 325 | -48.291 | -1.605  | -54.807 | 1.00 | 0.00 | D | C |
| ATOM | 15815 | CE  | LYS A 325 | -48.860 | -0.332  | -55.440 | 1.00 | 0.00 | D | C |
| ATOM | 15816 | NZ  | LYS A 325 | -49.449 | 0.543   | -54.402 | 1.00 | 0.00 | D | N |
| ATOM | 15817 | C   | LYS A 325 | -45.486 | -5.715  | -55.628 | 1.00 | 0.00 | D | C |
| ATOM | 15818 | O   | LYS A 325 | -45.733 | -6.170  | -54.510 | 1.00 | 0.00 | D | O |
| ATOM | 15819 | N   | LEU A 326 | -44.390 | -6.056  | -56.327 | 1.00 | 0.00 | D | N |
| ATOM | 15820 | CA  | LEU A 326 | -43.476 | -7.081  | -55.909 | 1.00 | 0.00 | D | C |
| ATOM | 15821 | CB  | LEU A 326 | -42.420 | -7.438  | -56.975 | 1.00 | 0.00 | D | C |
| ATOM | 15822 | CG  | LEU A 326 | -42.960 | -8.222  | -58.190 | 1.00 | 0.00 | D | C |
| ATOM | 15823 | CD1 | LEU A 326 | -43.943 | -7.388  | -59.025 | 1.00 | 0.00 | D | C |
| ATOM | 15824 | CD2 | LEU A 326 | -41.814 | -8.796  | -59.036 | 1.00 | 0.00 | D | C |
| ATOM | 15825 | C   | LEU A 326 | -42.731 | -6.749  | -54.651 | 1.00 | 0.00 | D | C |
| ATOM | 15826 | O   | LEU A 326 | -42.520 | -7.620  | -53.810 | 1.00 | 0.00 | D | O |

|      |       |     |           |         |         |         |      |      |   |   |
|------|-------|-----|-----------|---------|---------|---------|------|------|---|---|
| ATOM | 15827 | N   | GLU A 327 | -42.305 | -5.487  | -54.476 | 1.00 | 0.00 | D | N |
| ATOM | 15828 | CA  | GLU A 327 | -41.461 | -5.137  | -53.363 | 1.00 | 0.00 | D | C |
| ATOM | 15829 | CB  | GLU A 327 | -40.867 | -3.725  | -53.478 | 1.00 | 0.00 | D | C |
| ATOM | 15830 | CG  | GLU A 327 | -39.780 | -3.664  | -54.552 | 1.00 | 0.00 | D | C |
| ATOM | 15831 | CD  | GLU A 327 | -39.193 | -2.262  | -54.583 | 1.00 | 0.00 | D | C |
| ATOM | 15832 | OE1 | GLU A 327 | -39.910 | -1.332  | -55.042 | 1.00 | 0.00 | D | O |
| ATOM | 15833 | OE2 | GLU A 327 | -38.023 | -2.101  | -54.150 | 1.00 | 0.00 | D | O |
| ATOM | 15834 | C   | GLU A 327 | -42.166 | -5.278  | -52.051 | 1.00 | 0.00 | D | C |
| ATOM | 15835 | O   | GLU A 327 | -41.529 | -5.388  | -51.005 | 1.00 | 0.00 | D | O |
| ATOM | 15836 | N   | GLU A 328 | -43.502 | -5.188  | -52.065 | 1.00 | 0.00 | D | N |
| ATOM | 15837 | CA  | GLU A 328 | -44.323 | -5.266  | -50.891 | 1.00 | 0.00 | D | C |
| ATOM | 15838 | CB  | GLU A 328 | -45.735 | -4.729  | -51.161 | 1.00 | 0.00 | D | C |
| ATOM | 15839 | CG  | GLU A 328 | -45.690 | -3.215  | -51.397 | 1.00 | 0.00 | D | C |
| ATOM | 15840 | CD  | GLU A 328 | -47.072 | -2.716  | -51.786 | 1.00 | 0.00 | D | C |
| ATOM | 15841 | OE1 | GLU A 328 | -47.881 | -3.533  | -52.300 | 1.00 | 0.00 | D | O |
| ATOM | 15842 | OE2 | GLU A 328 | -47.330 | -1.501  | -51.583 | 1.00 | 0.00 | D | O |
| ATOM | 15843 | C   | GLU A 328 | -44.414 | -6.653  | -50.293 | 1.00 | 0.00 | D | C |
| ATOM | 15844 | O   | GLU A 328 | -44.668 | -6.771  | -49.096 | 1.00 | 0.00 | D | O |
| ATOM | 15845 | N   | LEU A 329 | -44.247 | -7.737  | -51.085 | 1.00 | 0.00 | D | N |
| ATOM | 15846 | CA  | LEU A 329 | -44.472 | -9.087  | -50.604 | 1.00 | 0.00 | D | C |
| ATOM | 15847 | CB  | LEU A 329 | -44.338 | -10.158 | -51.702 | 1.00 | 0.00 | D | C |
| ATOM | 15848 | CG  | LEU A 329 | -45.394 | -10.048 | -52.819 | 1.00 | 0.00 | D | C |
| ATOM | 15849 | CD1 | LEU A 329 | -45.250 | -8.731  | -53.597 | 1.00 | 0.00 | D | C |
| ATOM | 15850 | CD2 | LEU A 329 | -45.367 | -11.284 | -53.734 | 1.00 | 0.00 | D | C |
| ATOM | 15851 | C   | LEU A 329 | -43.536 | -9.477  | -49.489 | 1.00 | 0.00 | D | C |
| ATOM | 15852 | O   | LEU A 329 | -42.314 | -9.397  | -49.616 | 1.00 | 0.00 | D | O |
| ATOM | 15853 | N   | THR A 330 | -44.123 | -9.979  | -48.373 | 1.00 | 0.00 | D | N |
| ATOM | 15854 | CA  | THR A 330 | -43.398 | -10.335 | -47.180 | 1.00 | 0.00 | D | C |
| ATOM | 15855 | CB  | THR A 330 | -44.168 | -10.043 | -45.927 | 1.00 | 0.00 | D | C |
| ATOM | 15856 | OG1 | THR A 330 | -45.337 | -10.850 | -45.881 | 1.00 | 0.00 | D | O |
| ATOM | 15857 | CG2 | THR A 330 | -44.555 | -8.555  | -45.922 | 1.00 | 0.00 | D | C |
| ATOM | 15858 | C   | THR A 330 | -43.093 | -11.804 | -47.141 | 1.00 | 0.00 | D | C |
| ATOM | 15859 | O   | THR A 330 | -43.892 | -12.636 | -47.566 | 1.00 | 0.00 | D | O |
| ATOM | 15860 | N   | ASN A 331 | -41.907 | -12.151 | -46.587 | 1.00 | 0.00 | D | N |
| ATOM | 15861 | CA  | ASN A 331 | -41.507 | -13.520 | -46.420 | 1.00 | 0.00 | D | C |
| ATOM | 15862 | CB  | ASN A 331 | -39.977 | -13.729 | -46.339 | 1.00 | 0.00 | D | C |
| ATOM | 15863 | CG  | ASN A 331 | -39.405 | -13.009 | -45.125 | 1.00 | 0.00 | D | C |
| ATOM | 15864 | OD1 | ASN A 331 | -40.118 | -12.370 | -44.354 | 1.00 | 0.00 | D | O |

ATOM 15865 ND2 ASN A 331 -38.059 -13.103 -44.959 1.00 0.00 D N  
ATOM 15866 C ASN A 331 -42.158 -14.017 -45.161 1.00 0.00 D C  
ATOM 15867 O ASN A 331 -42.944 -13.306 -44.538 1.00 0.00 D O  
ATOM 15868 N LYS A 332 -41.831 -15.252 -44.740 1.00 0.00 D N  
ATOM 15869 CA LYS A 332 -42.466 -15.891 -43.617 1.00 0.00 D C  
ATOM 15870 CB LYS A 332 -41.718 -17.172 -43.218 1.00 0.00 D C  
ATOM 15871 CG LYS A 332 -42.331 -17.986 -42.081 1.00 0.00 D C  
ATOM 15872 CD LYS A 332 -41.506 -19.241 -41.767 1.00 0.00 D C  
ATOM 15873 CE LYS A 332 -40.960 -19.949 -43.012 1.00 0.00 D C  
ATOM 15874 NZ LYS A 332 -39.890 -20.900 -42.629 1.00 0.00 D N  
ATOM 15875 C LYS A 332 -42.372 -14.992 -42.422 1.00 0.00 D C  
ATOM 15876 O LYS A 332 -43.347 -14.799 -41.696 1.00 0.00 D O  
ATOM 15877 N LYS A 333 -41.190 -14.401 -42.203 1.00 0.00 D N  
ATOM 15878 CA LYS A 333 -40.906 -13.583 -41.060 1.00 0.00 D C  
ATOM 15879 CB LYS A 333 -39.424 -13.183 -40.967 1.00 0.00 D C  
ATOM 15880 CG LYS A 333 -38.513 -14.387 -40.723 1.00 0.00 D C  
ATOM 15881 CD LYS A 333 -37.027 -14.093 -40.922 1.00 0.00 D C  
ATOM 15882 CE LYS A 333 -36.148 -15.339 -40.801 1.00 0.00 D C  
ATOM 15883 NZ LYS A 333 -36.410 -16.011 -39.510 1.00 0.00 D N  
ATOM 15884 C LYS A 333 -41.739 -12.333 -41.087 1.00 0.00 D C  
ATOM 15885 O LYS A 333 -41.911 -11.683 -40.059 1.00 0.00 D O  
ATOM 15886 N GLY A 334 -42.256 -11.932 -42.263 1.00 0.00 D N  
ATOM 15887 CA GLY A 334 -43.022 -10.719 -42.308 1.00 0.00 D C  
ATOM 15888 C GLY A 334 -42.147 -9.643 -42.860 1.00 0.00 D C  
ATOM 15889 O GLY A 334 -42.437 -8.457 -42.713 1.00 0.00 D O  
ATOM 15890 N MET A 335 -41.046 -10.039 -43.532 1.00 0.00 D N  
ATOM 15891 CA MET A 335 -40.130 -9.054 -44.024 1.00 0.00 D C  
ATOM 15892 CB MET A 335 -38.662 -9.417 -43.741 1.00 0.00 D C  
ATOM 15893 CG MET A 335 -38.340 -9.524 -42.249 1.00 0.00 D C  
ATOM 15894 SD MET A 335 -36.618 -9.970 -41.871 1.00 0.00 D S  
ATOM 15895 CE MET A 335 -36.926 -10.326 -40.116 1.00 0.00 D C  
ATOM 15896 C MET A 335 -40.250 -8.889 -45.510 1.00 0.00 D C  
ATOM 15897 O MET A 335 -40.327 -9.854 -46.270 1.00 0.00 D O  
ATOM 15898 N THR A 336 -40.274 -7.613 -45.950 1.00 0.00 D N  
ATOM 15899 CA THR A 336 -40.235 -7.293 -47.346 1.00 0.00 D C  
ATOM 15900 CB THR A 336 -40.616 -5.876 -47.661 1.00 0.00 D C  
ATOM 15901 OG1 THR A 336 -39.704 -4.974 -47.052 1.00 0.00 D O  
ATOM 15902 CG2 THR A 336 -42.045 -5.620 -47.153 1.00 0.00 D C

|      |       |     |     |   |     |         |         |         |      |      |   |   |
|------|-------|-----|-----|---|-----|---------|---------|---------|------|------|---|---|
| ATOM | 15903 | C   | THR | A | 336 | -38.796 | -7.468  | -47.716 | 1.00 | 0.00 | D | C |
| ATOM | 15904 | O   | THR | A | 336 | -37.949 | -7.576  | -46.831 | 1.00 | 0.00 | D | O |
| ATOM | 15905 | N   | PRO | A | 337 | -38.468 | -7.503  | -48.981 | 1.00 | 0.00 | D | N |
| ATOM | 15906 | CD  | PRO | A | 337 | -39.426 | -7.729  | -50.048 | 1.00 | 0.00 | D | C |
| ATOM | 15907 | CA  | PRO | A | 337 | -37.109 | -7.707  | -49.395 | 1.00 | 0.00 | D | C |
| ATOM | 15908 | CB  | PRO | A | 337 | -37.148 | -7.709  | -50.921 | 1.00 | 0.00 | D | C |
| ATOM | 15909 | CG  | PRO | A | 337 | -38.576 | -8.191  | -51.247 | 1.00 | 0.00 | D | C |
| ATOM | 15910 | C   | PRO | A | 337 | -36.219 | -6.670  | -48.786 | 1.00 | 0.00 | D | C |
| ATOM | 15911 | O   | PRO | A | 337 | -35.153 | -7.019  | -48.288 | 1.00 | 0.00 | D | O |
| ATOM | 15912 | N   | LEU | A | 338 | -36.659 | -5.400  | -48.765 | 1.00 | 0.00 | D | N |
| ATOM | 15913 | CA  | LEU | A | 338 | -35.866 | -4.338  | -48.221 | 1.00 | 0.00 | D | C |
| ATOM | 15914 | CB  | LEU | A | 338 | -36.612 | -2.995  | -48.281 | 1.00 | 0.00 | D | C |
| ATOM | 15915 | CG  | LEU | A | 338 | -35.829 | -1.808  | -47.699 | 1.00 | 0.00 | D | C |
| ATOM | 15916 | CD1 | LEU | A | 338 | -34.611 | -1.452  | -48.566 | 1.00 | 0.00 | D | C |
| ATOM | 15917 | CD2 | LEU | A | 338 | -36.761 | -0.614  | -47.446 | 1.00 | 0.00 | D | C |
| ATOM | 15918 | C   | LEU | A | 338 | -35.604 | -4.620  | -46.776 | 1.00 | 0.00 | D | C |
| ATOM | 15919 | O   | LEU | A | 338 | -34.472 | -4.532  | -46.309 | 1.00 | 0.00 | D | O |
| ATOM | 15920 | N   | ALA | A | 339 | -36.656 | -5.011  | -46.033 | 1.00 | 0.00 | D | N |
| ATOM | 15921 | CA  | ALA | A | 339 | -36.555 | -5.207  | -44.615 | 1.00 | 0.00 | D | C |
| ATOM | 15922 | CB  | ALA | A | 339 | -37.898 | -5.600  | -43.977 | 1.00 | 0.00 | D | C |
| ATOM | 15923 | C   | ALA | A | 339 | -35.581 | -6.303  | -44.323 | 1.00 | 0.00 | D | C |
| ATOM | 15924 | O   | ALA | A | 339 | -34.838 | -6.234  | -43.346 | 1.00 | 0.00 | D | O |
| ATOM | 15925 | N   | LEU | A | 340 | -35.591 | -7.362  | -45.150 | 1.00 | 0.00 | D | N |
| ATOM | 15926 | CA  | LEU | A | 340 | -34.717 | -8.488  | -44.964 | 1.00 | 0.00 | D | C |
| ATOM | 15927 | CB  | LEU | A | 340 | -34.993 | -9.581  | -46.017 | 1.00 | 0.00 | D | C |
| ATOM | 15928 | CG  | LEU | A | 340 | -34.370 | -10.972 | -45.756 | 1.00 | 0.00 | D | C |
| ATOM | 15929 | CD1 | LEU | A | 340 | -34.588 | -11.890 | -46.968 | 1.00 | 0.00 | D | C |
| ATOM | 15930 | CD2 | LEU | A | 340 | -32.903 | -10.918 | -45.319 | 1.00 | 0.00 | D | C |
| ATOM | 15931 | C   | LEU | A | 340 | -33.307 | -8.009  | -45.140 | 1.00 | 0.00 | D | C |
| ATOM | 15932 | O   | LEU | A | 340 | -32.433 | -8.300  | -44.326 | 1.00 | 0.00 | D | O |
| ATOM | 15933 | N   | ALA | A | 341 | -33.065 | -7.197  | -46.189 | 1.00 | 0.00 | D | N |
| ATOM | 15934 | CA  | ALA | A | 341 | -31.727 | -6.772  | -46.490 | 1.00 | 0.00 | D | C |
| ATOM | 15935 | CB  | ALA | A | 341 | -31.672 | -5.793  | -47.676 | 1.00 | 0.00 | D | C |
| ATOM | 15936 | C   | ALA | A | 341 | -31.171 | -6.065  | -45.293 | 1.00 | 0.00 | D | C |
| ATOM | 15937 | O   | ALA | A | 341 | -30.012 | -6.272  | -44.936 | 1.00 | 0.00 | D | O |
| ATOM | 15938 | N   | ALA | A | 342 | -31.987 | -5.204  | -44.659 | 1.00 | 0.00 | D | N |
| ATOM | 15939 | CA  | ALA | A | 342 | -31.598 | -4.438  | -43.504 | 1.00 | 0.00 | D | C |
| ATOM | 15940 | CB  | ALA | A | 342 | -32.640 | -3.380  | -43.123 | 1.00 | 0.00 | D | C |



ATOM 15941 C ALA A 342 -31.378 -5.324 -42.314 1.00 0.00 D C  
ATOM 15942 O ALA A 342 -30.496 -5.068 -41.496 1.00 0.00 D O  
ATOM 15943 N GLY A 343 -32.212 -6.367 -42.149 1.00 0.00 D N  
ATOM 15944 CA GLY A 343 -32.046 -7.239 -41.021 1.00 0.00 D C  
ATOM 15945 C GLY A 343 -30.716 -7.940 -41.119 1.00 0.00 D C  
ATOM 15946 O GLY A 343 -30.046 -8.169 -40.113 1.00 0.00 D O  
ATOM 15947 N THR A 344 -30.349 -8.356 -42.345 1.00 0.00 D N  
ATOM 15948 CA THR A 344 -29.178 -9.122 -42.705 1.00 0.00 D C  
ATOM 15949 CB THR A 344 -29.419 -9.940 -43.949 1.00 0.00 D C  
ATOM 15950 OG1 THR A 344 -30.595 -10.717 -43.774 1.00 0.00 D O  
ATOM 15951 CG2 THR A 344 -28.250 -10.915 -44.166 1.00 0.00 D C  
ATOM 15952 C THR A 344 -27.914 -8.307 -42.860 1.00 0.00 D C  
ATOM 15953 O THR A 344 -26.839 -8.877 -43.033 1.00 0.00 D O  
ATOM 15954 N GLY A 345 -27.984 -6.962 -42.937 1.00 0.00 D N  
ATOM 15955 CA GLY A 345 -26.760 -6.216 -43.072 1.00 0.00 D C  
ATOM 15956 C GLY A 345 -26.263 -6.283 -44.489 1.00 0.00 D C  
ATOM 15957 O GLY A 345 -25.055 -6.259 -44.727 1.00 0.00 D O  
ATOM 15958 N LYS A 346 -27.176 -6.406 -45.473 1.00 0.00 D N  
ATOM 15959 CA LYS A 346 -26.736 -6.377 -46.845 1.00 0.00 D C  
ATOM 15960 CB LYS A 346 -27.505 -7.337 -47.773 1.00 0.00 D C  
ATOM 15961 CG LYS A 346 -26.931 -8.756 -47.765 1.00 0.00 D C  
ATOM 15962 CD LYS A 346 -27.020 -9.478 -46.424 1.00 0.00 D C  
ATOM 15963 CE LYS A 346 -26.353 -10.857 -46.423 1.00 0.00 D C  
ATOM 15964 NZ LYS A 346 -27.117 -11.796 -47.276 1.00 0.00 D N  
ATOM 15965 C LYS A 346 -26.937 -4.971 -47.321 1.00 0.00 D C  
ATOM 15966 O LYS A 346 -27.903 -4.660 -48.013 1.00 0.00 D O  
ATOM 15967 N ILE A 347 -25.956 -4.110 -46.979 1.00 0.00 D N  
ATOM 15968 CA ILE A 347 -26.015 -2.682 -47.136 1.00 0.00 D C  
ATOM 15969 CB ILE A 347 -24.835 -1.965 -46.542 1.00 0.00 D C  
ATOM 15970 CG2 ILE A 347 -24.993 -0.473 -46.891 1.00 0.00 D C  
ATOM 15971 CG1 ILE A 347 -24.711 -2.215 -45.031 1.00 0.00 D C  
ATOM 15972 CD ILE A 347 -24.260 -3.630 -44.670 1.00 0.00 D C  
ATOM 15973 C ILE A 347 -26.060 -2.218 -48.555 1.00 0.00 D C  
ATOM 15974 O ILE A 347 -26.866 -1.357 -48.899 1.00 0.00 D O  
ATOM 15975 N GLY A 348 -25.197 -2.768 -49.425 1.00 0.00 D N  
ATOM 15976 CA GLY A 348 -25.105 -2.243 -50.757 1.00 0.00 D C  
ATOM 15977 C GLY A 348 -26.439 -2.354 -51.418 1.00 0.00 D C  
ATOM 15978 O GLY A 348 -26.856 -1.458 -52.149 1.00 0.00 D O

|      |       |     |           |         |        |         |      |      |   |   |
|------|-------|-----|-----------|---------|--------|---------|------|------|---|---|
| ATOM | 15979 | N   | VAL A 349 | -27.125 | -3.489 | -51.199 | 1.00 | 0.00 | D | N |
| ATOM | 15980 | CA  | VAL A 349 | -28.407 | -3.753 | -51.784 | 1.00 | 0.00 | D | C |
| ATOM | 15981 | CB  | VAL A 349 | -28.845 | -5.177 | -51.574 | 1.00 | 0.00 | D | C |
| ATOM | 15982 | CG1 | VAL A 349 | -30.227 | -5.373 | -52.221 | 1.00 | 0.00 | D | C |
| ATOM | 15983 | CG2 | VAL A 349 | -27.761 | -6.109 | -52.140 | 1.00 | 0.00 | D | C |
| ATOM | 15984 | C   | VAL A 349 | -29.439 | -2.852 | -51.181 | 1.00 | 0.00 | D | C |
| ATOM | 15985 | O   | VAL A 349 | -30.278 | -2.295 | -51.886 | 1.00 | 0.00 | D | O |
| ATOM | 15986 | N   | LEU A 350 | -29.382 | -2.671 | -49.848 | 1.00 | 0.00 | D | N |
| ATOM | 15987 | CA  | LEU A 350 | -30.354 | -1.865 | -49.167 | 1.00 | 0.00 | D | C |
| ATOM | 15988 | CB  | LEU A 350 | -30.040 | -1.779 | -47.659 | 1.00 | 0.00 | D | C |
| ATOM | 15989 | CG  | LEU A 350 | -31.099 | -1.109 | -46.752 | 1.00 | 0.00 | D | C |
| ATOM | 15990 | CD1 | LEU A 350 | -30.619 | -1.118 | -45.293 | 1.00 | 0.00 | D | C |
| ATOM | 15991 | CD2 | LEU A 350 | -31.494 | 0.303  | -47.211 | 1.00 | 0.00 | D | C |
| ATOM | 15992 | C   | LEU A 350 | -30.288 | -0.491 | -49.766 | 1.00 | 0.00 | D | C |
| ATOM | 15993 | O   | LEU A 350 | -31.313 | 0.104  | -50.101 | 1.00 | 0.00 | D | O |
| ATOM | 15994 | N   | ALA A 351 | -29.063 | 0.039  | -49.952 | 1.00 | 0.00 | D | N |
| ATOM | 15995 | CA  | ALA A 351 | -28.899 | 1.352  | -50.505 | 1.00 | 0.00 | D | C |
| ATOM | 15996 | CB  | ALA A 351 | -27.420 | 1.754  | -50.629 | 1.00 | 0.00 | D | C |
| ATOM | 15997 | C   | ALA A 351 | -29.481 | 1.352  | -51.884 | 1.00 | 0.00 | D | C |
| ATOM | 15998 | O   | ALA A 351 | -30.130 | 2.310  | -52.299 | 1.00 | 0.00 | D | O |
| ATOM | 15999 | N   | TYR A 352 | -29.252 | 0.258  | -52.624 | 1.00 | 0.00 | D | N |
| ATOM | 16000 | CA  | TYR A 352 | -29.707 | 0.107  | -53.974 | 1.00 | 0.00 | D | C |
| ATOM | 16001 | CB  | TYR A 352 | -29.197 | -1.216 | -54.559 | 1.00 | 0.00 | D | C |
| ATOM | 16002 | CG  | TYR A 352 | -30.047 | -1.605 | -55.713 | 1.00 | 0.00 | D | C |
| ATOM | 16003 | CD1 | TYR A 352 | -30.006 | -0.923 | -56.905 | 1.00 | 0.00 | D | C |
| ATOM | 16004 | CE1 | TYR A 352 | -30.798 | -1.327 | -57.955 | 1.00 | 0.00 | D | C |
| ATOM | 16005 | CZ  | TYR A 352 | -31.630 | -2.411 | -57.820 | 1.00 | 0.00 | D | C |
| ATOM | 16006 | OH  | TYR A 352 | -32.441 | -2.827 | -58.897 | 1.00 | 0.00 | D | O |
| ATOM | 16007 | CD2 | TYR A 352 | -30.884 | -2.686 | -55.583 | 1.00 | 0.00 | D | C |
| ATOM | 16008 | CE2 | TYR A 352 | -31.677 | -3.093 | -56.629 | 1.00 | 0.00 | D | C |
| ATOM | 16009 | C   | TYR A 352 | -31.201 | 0.138  | -54.054 | 1.00 | 0.00 | D | C |
| ATOM | 16010 | O   | TYR A 352 | -31.756 | 0.809  | -54.918 | 1.00 | 0.00 | D | O |
| ATOM | 16011 | N   | ILE A 353 | -31.908 | -0.585 | -53.166 | 1.00 | 0.00 | D | N |
| ATOM | 16012 | CA  | ILE A 353 | -33.339 | -0.640 | -53.273 | 1.00 | 0.00 | D | C |
| ATOM | 16013 | CB  | ILE A 353 | -33.972 | -1.671 | -52.382 | 1.00 | 0.00 | D | C |
| ATOM | 16014 | CG2 | ILE A 353 | -35.495 | -1.456 | -52.404 | 1.00 | 0.00 | D | C |
| ATOM | 16015 | CG1 | ILE A 353 | -33.549 | -3.083 | -52.828 | 1.00 | 0.00 | D | C |
| ATOM | 16016 | CD  | ILE A 353 | -33.975 | -4.186 | -51.859 | 1.00 | 0.00 | D | C |

ATOM 16017 C ILE A 353 -33.965 0.688 -52.993 1.00 0.00 D C  
ATOM 16018 O ILE A 353 -34.916 1.070 -53.667 1.00 0.00 D O  
ATOM 16019 N LEU A 354 -33.494 1.392 -51.947 1.00 0.00 D N  
ATOM 16020 CA LEU A 354 -34.025 2.670 -51.554 1.00 0.00 D C  
ATOM 16021 CB LEU A 354 -33.488 3.108 -50.187 1.00 0.00 D C  
ATOM 16022 CG LEU A 354 -33.861 2.149 -49.043 1.00 0.00 D C  
ATOM 16023 CD1 LEU A 354 -33.253 2.626 -47.717 1.00 0.00 D C  
ATOM 16024 CD2 LEU A 354 -35.380 1.934 -48.951 1.00 0.00 D C  
ATOM 16025 C LEU A 354 -33.638 3.748 -52.525 1.00 0.00 D C  
ATOM 16026 O LEU A 354 -34.371 4.694 -52.761 1.00 0.00 D O  
ATOM 16027 N GLN A 355 -32.390 3.724 -52.990 1.00 0.00 D N  
ATOM 16028 CA GLN A 355 -31.804 4.690 -53.876 1.00 0.00 D C  
ATOM 16029 CB GLN A 355 -30.318 4.930 -53.570 1.00 0.00 D C  
ATOM 16030 CG GLN A 355 -30.108 5.837 -52.345 1.00 0.00 D C  
ATOM 16031 CD GLN A 355 -30.968 5.346 -51.186 1.00 0.00 D C  
ATOM 16032 OE1 GLN A 355 -30.533 4.555 -50.353 1.00 0.00 D O  
ATOM 16033 NE2 GLN A 355 -32.244 5.822 -51.137 1.00 0.00 D N  
ATOM 16034 C GLN A 355 -31.993 4.405 -55.329 1.00 0.00 D C  
ATOM 16035 O GLN A 355 -31.605 5.238 -56.139 1.00 0.00 D O  
ATOM 16036 N ARG A 356 -32.452 3.193 -55.709 1.00 0.00 D N  
ATOM 16037 CA ARG A 356 -32.487 2.786 -57.092 1.00 0.00 D C  
ATOM 16038 CB ARG A 356 -32.973 1.345 -57.310 1.00 0.00 D C  
ATOM 16039 CG ARG A 356 -33.004 0.957 -58.788 1.00 0.00 D C  
ATOM 16040 CD ARG A 356 -33.951 -0.201 -59.112 1.00 0.00 D C  
ATOM 16041 NE ARG A 356 -35.339 0.283 -58.862 1.00 0.00 D N  
ATOM 16042 CZ ARG A 356 -36.063 -0.224 -57.821 1.00 0.00 D C  
ATOM 16043 NH1 ARG A 356 -35.549 -1.236 -57.064 1.00 0.00 D N  
ATOM 16044 NH2 ARG A 356 -37.301 0.277 -57.544 1.00 0.00 D N  
ATOM 16045 C ARG A 356 -33.454 3.610 -57.873 1.00 0.00 D C  
ATOM 16046 O ARG A 356 -34.549 3.150 -58.197 1.00 0.00 D O  
ATOM 16047 N GLU A 357 -33.025 4.822 -58.267 1.00 0.00 D N  
ATOM 16048 CA GLU A 357 -33.834 5.728 -59.023 1.00 0.00 D C  
ATOM 16049 CB GLU A 357 -33.178 7.104 -59.191 1.00 0.00 D C  
ATOM 16050 CG GLU A 357 -31.858 6.971 -59.962 1.00 0.00 D C  
ATOM 16051 CD GLU A 357 -31.308 8.349 -60.290 1.00 0.00 D C  
ATOM 16052 OE1 GLU A 357 -31.158 9.172 -59.350 1.00 0.00 D O  
ATOM 16053 OE2 GLU A 357 -31.027 8.594 -61.495 1.00 0.00 D O  
ATOM 16054 C GLU A 357 -33.902 5.171 -60.405 1.00 0.00 D C

ATOM 16055 O GLU A 357 -32.933 4.583 -60.886 1.00 0.00 D O  
ATOM 16056 N ILE A 358 -35.050 5.320 -61.095 1.00 0.00 D N  
ATOM 16057 CA ILE A 358 -35.067 4.794 -62.425 1.00 0.00 D C  
ATOM 16058 CB ILE A 358 -35.767 3.465 -62.499 1.00 0.00 D C  
ATOM 16059 CG2 ILE A 358 -37.272 3.710 -62.305 1.00 0.00 D C  
ATOM 16060 CG1 ILE A 358 -35.374 2.702 -63.778 1.00 0.00 D C  
ATOM 16061 CD ILE A 358 -33.910 2.266 -63.822 1.00 0.00 D C  
ATOM 16062 C ILE A 358 -35.732 5.804 -63.317 1.00 0.00 D C  
ATOM 16063 O ILE A 358 -36.682 6.472 -62.908 1.00 0.00 D O  
ATOM 16064 N GLN A 359 -35.222 5.978 -64.557 1.00 0.00 D N  
ATOM 16065 CA GLN A 359 -35.827 6.934 -65.445 1.00 0.00 D C  
ATOM 16066 CB GLN A 359 -34.961 8.181 -65.702 1.00 0.00 D C  
ATOM 16067 CG GLN A 359 -35.620 9.193 -66.641 1.00 0.00 D C  
ATOM 16068 CD GLN A 359 -36.765 9.875 -65.898 1.00 0.00 D C  
ATOM 16069 OE1 GLN A 359 -37.233 9.389 -64.868 1.00 0.00 D O  
ATOM 16070 NE2 GLN A 359 -37.232 11.032 -66.435 1.00 0.00 D N  
ATOM 16071 C GLN A 359 -36.066 6.263 -66.763 1.00 0.00 D C  
ATOM 16072 O GLN A 359 -35.145 5.731 -67.385 1.00 0.00 D O  
ATOM 16073 N GLU A 360 -37.341 6.283 -67.209 1.00 0.00 D N  
ATOM 16074 CA GLU A 360 -37.781 5.633 -68.413 1.00 0.00 D C  
ATOM 16075 CB GLU A 360 -37.441 4.120 -68.389 1.00 0.00 D C  
ATOM 16076 CG GLU A 360 -37.797 3.274 -69.613 1.00 0.00 D C  
ATOM 16077 CD GLU A 360 -39.120 2.591 -69.308 1.00 0.00 D C  
ATOM 16078 OE1 GLU A 360 -39.317 2.190 -68.130 1.00 0.00 D O  
ATOM 16079 OE2 GLU A 360 -39.953 2.461 -70.245 1.00 0.00 D O  
ATOM 16080 C GLU A 360 -39.270 5.851 -68.431 1.00 0.00 D C  
ATOM 16081 O GLU A 360 -39.804 6.418 -67.476 1.00 0.00 D O  
ATOM 16082 N PRO A 361 -39.980 5.437 -69.447 1.00 0.00 D N  
ATOM 16083 CD PRO A 361 -39.445 5.495 -70.800 1.00 0.00 D C  
ATOM 16084 CA PRO A 361 -41.389 5.705 -69.455 1.00 0.00 D C  
ATOM 16085 CB PRO A 361 -41.876 5.316 -70.846 1.00 0.00 D C  
ATOM 16086 CG PRO A 361 -40.662 5.654 -71.731 1.00 0.00 D C  
ATOM 16087 C PRO A 361 -42.196 5.165 -68.321 1.00 0.00 D C  
ATOM 16088 O PRO A 361 -43.262 5.695 -68.055 1.00 0.00 D O  
ATOM 16089 N GLU A 362 -41.841 4.097 -67.623 1.00 0.00 D N  
ATOM 16090 CA GLU A 362 -42.770 3.963 -66.541 1.00 0.00 D C  
ATOM 16091 CB GLU A 362 -43.493 2.608 -66.534 1.00 0.00 D C  
ATOM 16092 CG GLU A 362 -44.327 2.363 -67.793 1.00 0.00 D C

|      |       |     |           |         |        |         |      |      |   |   |
|------|-------|-----|-----------|---------|--------|---------|------|------|---|---|
| ATOM | 16093 | CD  | GLU A 362 | -43.382 | 1.872  | -68.883 | 1.00 | 0.00 | D | C |
| ATOM | 16094 | OE1 | GLU A 362 | -42.744 | 0.806  | -68.673 | 1.00 | 0.00 | D | O |
| ATOM | 16095 | OE2 | GLU A 362 | -43.280 | 2.557  | -69.936 | 1.00 | 0.00 | D | O |
| ATOM | 16096 | C   | GLU A 362 | -41.926 | 4.006  | -65.325 | 1.00 | 0.00 | D | C |
| ATOM | 16097 | O   | GLU A 362 | -42.158 | 3.285  | -64.358 | 1.00 | 0.00 | D | O |
| ATOM | 16098 | N   | CYS A 363 | -40.898 | 4.858  | -65.345 | 1.00 | 0.00 | D | N |
| ATOM | 16099 | CA  | CYS A 363 | -39.961 | 4.862  | -64.265 | 1.00 | 0.00 | D | C |
| ATOM | 16100 | CB  | CYS A 363 | -38.584 | 5.405  | -64.634 | 1.00 | 0.00 | D | C |
| ATOM | 16101 | SG  | CYS A 363 | -37.632 | 4.041  | -65.338 | 1.00 | 0.00 | D | S |
| ATOM | 16102 | C   | CYS A 363 | -40.395 | 5.487  | -62.977 | 1.00 | 0.00 | D | C |
| ATOM | 16103 | O   | CYS A 363 | -40.015 | 5.002  | -61.915 | 1.00 | 0.00 | D | O |
| ATOM | 16104 | N   | ARG A 364 | -41.200 | 6.556  | -63.020 | 1.00 | 0.00 | D | N |
| ATOM | 16105 | CA  | ARG A 364 | -41.430 | 7.331  | -61.831 | 1.00 | 0.00 | D | C |
| ATOM | 16106 | CB  | ARG A 364 | -42.309 | 8.573  | -62.086 | 1.00 | 0.00 | D | C |
| ATOM | 16107 | CG  | ARG A 364 | -42.474 | 9.491  | -60.868 | 1.00 | 0.00 | D | C |
| ATOM | 16108 | CD  | ARG A 364 | -43.305 | 10.747 | -61.160 | 1.00 | 0.00 | D | C |
| ATOM | 16109 | NE  | ARG A 364 | -43.591 | 11.431 | -59.864 | 1.00 | 0.00 | D | N |
| ATOM | 16110 | CZ  | ARG A 364 | -42.728 | 12.357 | -59.351 | 1.00 | 0.00 | D | C |
| ATOM | 16111 | NH1 | ARG A 364 | -41.567 | 12.653 | -60.006 | 1.00 | 0.00 | D | N |
| ATOM | 16112 | NH2 | ARG A 364 | -43.030 | 12.997 | -58.183 | 1.00 | 0.00 | D | N |
| ATOM | 16113 | C   | ARG A 364 | -42.045 | 6.523  | -60.729 | 1.00 | 0.00 | D | C |
| ATOM | 16114 | O   | ARG A 364 | -41.646 | 6.660  | -59.575 | 1.00 | 0.00 | D | O |
| ATOM | 16115 | N   | HSD A 365 | -43.023 | 5.649  | -61.025 | 1.00 | 0.00 | D | N |
| ATOM | 16116 | CA  | HSD A 365 | -43.668 | 4.940  | -59.953 | 1.00 | 0.00 | D | C |
| ATOM | 16117 | CB  | HSD A 365 | -44.857 | 4.079  | -60.406 | 1.00 | 0.00 | D | C |
| ATOM | 16118 | ND1 | HSD A 365 | -43.656 | 2.828  | -62.235 | 1.00 | 0.00 | D | N |
| ATOM | 16119 | CG  | HSD A 365 | -44.426 | 2.830  | -61.098 | 1.00 | 0.00 | D | C |
| ATOM | 16120 | CE1 | HSD A 365 | -43.466 | 1.531  | -62.578 | 1.00 | 0.00 | D | C |
| ATOM | 16121 | NE2 | HSD A 365 | -44.060 | 0.700  | -61.741 | 1.00 | 0.00 | D | N |
| ATOM | 16122 | CD2 | HSD A 365 | -44.665 | 1.522  | -60.810 | 1.00 | 0.00 | D | C |
| ATOM | 16123 | C   | HSD A 365 | -42.677 | 4.043  | -59.268 | 1.00 | 0.00 | D | C |
| ATOM | 16124 | O   | HSD A 365 | -42.724 | 3.873  | -58.050 | 1.00 | 0.00 | D | O |
| ATOM | 16125 | N   | LEU A 366 | -41.778 | 3.418  | -60.049 | 1.00 | 0.00 | D | N |
| ATOM | 16126 | CA  | LEU A 366 | -40.781 | 2.482  | -59.586 | 1.00 | 0.00 | D | C |
| ATOM | 16127 | CB  | LEU A 366 | -40.076 | 1.808  | -60.781 | 1.00 | 0.00 | D | C |
| ATOM | 16128 | CG  | LEU A 366 | -39.045 | 0.728  | -60.412 | 1.00 | 0.00 | D | C |
| ATOM | 16129 | CD1 | LEU A 366 | -39.717 | -0.485 | -59.752 | 1.00 | 0.00 | D | C |
| ATOM | 16130 | CD2 | LEU A 366 | -38.191 | 0.342  | -61.633 | 1.00 | 0.00 | D | C |

|      |       |     |           |         |        |         |      |      |   |   |
|------|-------|-----|-----------|---------|--------|---------|------|------|---|---|
| ATOM | 16131 | C   | LEU A 366 | -39.708 | 3.118  | -58.731 | 1.00 | 0.00 | D | C |
| ATOM | 16132 | O   | LEU A 366 | -39.321 | 2.549  | -57.708 | 1.00 | 0.00 | D | O |
| ATOM | 16133 | N   | SER A 367 | -39.202 | 4.311  | -59.114 | 1.00 | 0.00 | D | N |
| ATOM | 16134 | CA  | SER A 367 | -38.021 | 4.852  | -58.480 | 1.00 | 0.00 | D | C |
| ATOM | 16135 | CB  | SER A 367 | -37.323 | 5.954  | -59.301 | 1.00 | 0.00 | D | C |
| ATOM | 16136 | OG  | SER A 367 | -38.149 | 7.104  | -59.405 | 1.00 | 0.00 | D | O |
| ATOM | 16137 | C   | SER A 367 | -38.259 | 5.403  | -57.115 | 1.00 | 0.00 | D | C |
| ATOM | 16138 | O   | SER A 367 | -39.272 | 6.036  | -56.827 | 1.00 | 0.00 | D | O |
| ATOM | 16139 | N   | ARG A 368 | -37.330 | 5.070  | -56.198 | 1.00 | 0.00 | D | N |
| ATOM | 16140 | CA  | ARG A 368 | -37.335 | 5.583  | -54.867 | 1.00 | 0.00 | D | C |
| ATOM | 16141 | CB  | ARG A 368 | -36.792 | 4.555  | -53.885 | 1.00 | 0.00 | D | C |
| ATOM | 16142 | CG  | ARG A 368 | -37.520 | 3.210  | -53.941 | 1.00 | 0.00 | D | C |
| ATOM | 16143 | CD  | ARG A 368 | -38.338 | 2.894  | -52.692 | 1.00 | 0.00 | D | C |
| ATOM | 16144 | NE  | ARG A 368 | -38.600 | 4.197  | -52.036 | 1.00 | 0.00 | D | N |
| ATOM | 16145 | CZ  | ARG A 368 | -37.722 | 4.615  | -51.086 | 1.00 | 0.00 | D | C |
| ATOM | 16146 | NH1 | ARG A 368 | -36.741 | 3.768  | -50.667 | 1.00 | 0.00 | D | N |
| ATOM | 16147 | NH2 | ARG A 368 | -37.780 | 5.875  | -50.579 | 1.00 | 0.00 | D | N |
| ATOM | 16148 | C   | ARG A 368 | -36.683 | 6.949  | -54.765 | 1.00 | 0.00 | D | C |
| ATOM | 16149 | O   | ARG A 368 | -37.109 | 7.768  | -53.964 | 1.00 | 0.00 | D | O |
| ATOM | 16150 | N   | LYS A 369 | -35.629 | 7.275  | -55.548 | 1.00 | 0.00 | D | N |
| ATOM | 16151 | CA  | LYS A 369 | -35.034 | 8.576  | -55.345 | 1.00 | 0.00 | D | C |
| ATOM | 16152 | CB  | LYS A 369 | -33.586 | 8.515  | -54.822 | 1.00 | 0.00 | D | C |
| ATOM | 16153 | CG  | LYS A 369 | -32.577 | 7.909  | -55.798 | 1.00 | 0.00 | D | C |
| ATOM | 16154 | CD  | LYS A 369 | -31.127 | 8.121  | -55.360 | 1.00 | 0.00 | D | C |
| ATOM | 16155 | CE  | LYS A 369 | -30.095 | 7.522  | -56.317 | 1.00 | 0.00 | D | C |
| ATOM | 16156 | NZ  | LYS A 369 | -28.735 | 7.674  | -55.754 | 1.00 | 0.00 | D | N |
| ATOM | 16157 | C   | LYS A 369 | -35.028 | 9.378  | -56.618 | 1.00 | 0.00 | D | C |
| ATOM | 16158 | O   | LYS A 369 | -34.720 | 8.873  | -57.699 | 1.00 | 0.00 | D | O |
| ATOM | 16159 | N   | PHE A 370 | -35.378 | 10.680 | -56.495 | 1.00 | 0.00 | D | N |
| ATOM | 16160 | CA  | PHE A 370 | -35.416 | 11.589 | -57.608 | 1.00 | 0.00 | D | C |
| ATOM | 16161 | CB  | PHE A 370 | -36.784 | 12.273 | -57.755 | 1.00 | 0.00 | D | C |
| ATOM | 16162 | CG  | PHE A 370 | -37.852 | 11.233 | -57.813 | 1.00 | 0.00 | D | C |
| ATOM | 16163 | CD1 | PHE A 370 | -38.194 | 10.539 | -56.678 | 1.00 | 0.00 | D | C |
| ATOM | 16164 | CE1 | PHE A 370 | -39.182 | 9.584  | -56.703 | 1.00 | 0.00 | D | C |
| ATOM | 16165 | CZ  | PHE A 370 | -39.846 | 9.317  | -57.876 | 1.00 | 0.00 | D | C |
| ATOM | 16166 | CD2 | PHE A 370 | -38.529 | 10.970 | -58.982 | 1.00 | 0.00 | D | C |
| ATOM | 16167 | CE2 | PHE A 370 | -39.516 | 10.014 | -59.014 | 1.00 | 0.00 | D | C |
| ATOM | 16168 | C   | PHE A 370 | -34.493 | 12.714 | -57.248 | 1.00 | 0.00 | D | C |

ATOM 16169 O PHE A 370 -34.625 13.289 -56.174 1.00 0.00 D O  
ATOM 16170 N THR A 371 -33.530 13.079 -58.113 1.00 0.00 D N  
ATOM 16171 CA THR A 371 -32.679 14.173 -57.733 1.00 0.00 D C  
ATOM 16172 CB THR A 371 -31.310 13.717 -57.320 1.00 0.00 D C  
ATOM 16173 OG1 THR A 371 -30.589 13.207 -58.433 1.00 0.00 D O  
ATOM 16174 CG2 THR A 371 -31.492 12.585 -56.299 1.00 0.00 D C  
ATOM 16175 C THR A 371 -32.496 15.042 -58.939 1.00 0.00 D C  
ATOM 16176 O THR A 371 -32.133 14.540 -60.002 1.00 0.00 D O  
ATOM 16177 N GLU A 372 -32.757 16.363 -58.834 1.00 0.00 D N  
ATOM 16178 CA GLU A 372 -32.489 17.150 -60.005 1.00 0.00 D C  
ATOM 16179 CB GLU A 372 -33.639 17.161 -61.028 1.00 0.00 D C  
ATOM 16180 CG GLU A 372 -33.843 15.815 -61.723 1.00 0.00 D C  
ATOM 16181 CD GLU A 372 -34.894 15.991 -62.805 1.00 0.00 D C  
ATOM 16182 OE1 GLU A 372 -35.145 17.160 -63.200 1.00 0.00 D O  
ATOM 16183 OE2 GLU A 372 -35.455 14.956 -63.256 1.00 0.00 D O  
ATOM 16184 C GLU A 372 -32.199 18.581 -59.648 1.00 0.00 D C  
ATOM 16185 O GLU A 372 -33.094 19.425 -59.658 1.00 0.00 D O  
ATOM 16186 N TRP A 373 -30.923 18.889 -59.334 1.00 0.00 D N  
ATOM 16187 CA TRP A 373 -30.475 20.235 -59.109 1.00 0.00 D C  
ATOM 16188 CB TRP A 373 -30.736 20.769 -57.684 1.00 0.00 D C  
ATOM 16189 CG TRP A 373 -32.153 21.196 -57.367 1.00 0.00 D C  
ATOM 16190 CD1 TRP A 373 -33.262 20.444 -57.112 1.00 0.00 D C  
ATOM 16191 NE1 TRP A 373 -34.331 21.263 -56.825 1.00 0.00 D N  
ATOM 16192 CE2 TRP A 373 -33.905 22.575 -56.888 1.00 0.00 D C  
ATOM 16193 CD2 TRP A 373 -32.552 22.567 -57.226 1.00 0.00 D C  
ATOM 16194 CE3 TRP A 373 -31.847 23.730 -57.362 1.00 0.00 D C  
ATOM 16195 CZ3 TRP A 373 -32.526 24.912 -57.154 1.00 0.00 D C  
ATOM 16196 CZ2 TRP A 373 -34.575 23.746 -56.682 1.00 0.00 D C  
ATOM 16197 CH2 TRP A 373 -33.864 24.919 -56.822 1.00 0.00 D C  
ATOM 16198 C TRP A 373 -28.987 20.202 -59.268 1.00 0.00 D C  
ATOM 16199 O TRP A 373 -28.286 19.636 -58.434 1.00 0.00 D O  
ATOM 16200 N ALA A 374 -28.423 20.812 -60.325 1.00 0.00 D N  
ATOM 16201 CA ALA A 374 -26.991 20.695 -60.366 1.00 0.00 D C  
ATOM 16202 CB ALA A 374 -26.491 19.527 -61.237 1.00 0.00 D C  
ATOM 16203 C ALA A 374 -26.384 21.938 -60.925 1.00 0.00 D C  
ATOM 16204 O ALA A 374 -26.846 22.476 -61.931 1.00 0.00 D O  
ATOM 16205 N TYR A 375 -25.325 22.441 -60.255 1.00 0.00 D N  
ATOM 16206 CA TYR A 375 -24.616 23.577 -60.770 1.00 0.00 D C

|      |       |     |     |   |     |         |        |         |      |      |   |   |
|------|-------|-----|-----|---|-----|---------|--------|---------|------|------|---|---|
| ATOM | 16207 | CB  | TYR | A | 375 | -24.765 | 24.845 | -59.915 | 1.00 | 0.00 | D | C |
| ATOM | 16208 | CG  | TYR | A | 375 | -24.425 | 26.001 | -60.795 | 1.00 | 0.00 | D | C |
| ATOM | 16209 | CD1 | TYR | A | 375 | -25.314 | 26.458 | -61.741 | 1.00 | 0.00 | D | C |
| ATOM | 16210 | CE1 | TYR | A | 375 | -24.991 | 27.523 | -62.550 | 1.00 | 0.00 | D | C |
| ATOM | 16211 | CZ  | TYR | A | 375 | -23.773 | 28.144 | -62.414 | 1.00 | 0.00 | D | C |
| ATOM | 16212 | OH  | TYR | A | 375 | -23.436 | 29.238 | -63.241 | 1.00 | 0.00 | D | O |
| ATOM | 16213 | CD2 | TYR | A | 375 | -23.210 | 26.634 | -60.665 | 1.00 | 0.00 | D | C |
| ATOM | 16214 | CE2 | TYR | A | 375 | -22.883 | 27.699 | -61.470 | 1.00 | 0.00 | D | C |
| ATOM | 16215 | C   | TYR | A | 375 | -23.155 | 23.269 | -60.796 | 1.00 | 0.00 | D | C |
| ATOM | 16216 | O   | TYR | A | 375 | -22.490 | 23.353 | -59.766 | 1.00 | 0.00 | D | O |
| ATOM | 16217 | N   | GLY | A | 376 | -22.637 | 22.825 | -61.956 | 1.00 | 0.00 | D | N |
| ATOM | 16218 | CA  | GLY | A | 376 | -21.224 | 22.694 | -62.153 | 1.00 | 0.00 | D | C |
| ATOM | 16219 | C   | GLY | A | 376 | -20.701 | 21.636 | -61.237 | 1.00 | 0.00 | D | C |
| ATOM | 16220 | O   | GLY | A | 376 | -20.657 | 20.441 | -61.518 | 1.00 | 0.00 | D | O |
| ATOM | 16221 | N   | PRO | A | 377 | -20.223 | 22.189 | -60.158 | 1.00 | 0.00 | D | N |
| ATOM | 16222 | CD  | PRO | A | 377 | -19.670 | 23.529 | -60.244 | 1.00 | 0.00 | D | C |
| ATOM | 16223 | CA  | PRO | A | 377 | -19.671 | 21.454 | -59.048 | 1.00 | 0.00 | D | C |
| ATOM | 16224 | CB  | PRO | A | 377 | -18.638 | 22.373 | -58.400 | 1.00 | 0.00 | D | C |
| ATOM | 16225 | CG  | PRO | A | 377 | -19.025 | 23.781 | -58.877 | 1.00 | 0.00 | D | C |
| ATOM | 16226 | C   | PRO | A | 377 | -20.662 | 20.960 | -58.045 | 1.00 | 0.00 | D | C |
| ATOM | 16227 | O   | PRO | A | 377 | -20.270 | 20.155 | -57.201 | 1.00 | 0.00 | D | O |
| ATOM | 16228 | N   | VAL | A | 378 | -21.930 | 21.420 | -58.089 | 1.00 | 0.00 | D | N |
| ATOM | 16229 | CA  | VAL | A | 378 | -22.824 | 21.110 | -57.008 | 1.00 | 0.00 | D | C |
| ATOM | 16230 | CB  | VAL | A | 378 | -23.553 | 22.319 | -56.490 | 1.00 | 0.00 | D | C |
| ATOM | 16231 | CG1 | VAL | A | 378 | -24.466 | 22.863 | -57.597 | 1.00 | 0.00 | D | C |
| ATOM | 16232 | CG2 | VAL | A | 378 | -24.297 | 21.946 | -55.197 | 1.00 | 0.00 | D | C |
| ATOM | 16233 | C   | VAL | A | 378 | -23.829 | 20.090 | -57.436 | 1.00 | 0.00 | D | C |
| ATOM | 16234 | O   | VAL | A | 378 | -24.028 | 19.851 | -58.626 | 1.00 | 0.00 | D | O |
| ATOM | 16235 | N   | HSD | A | 379 | -24.459 | 19.421 | -56.450 | 1.00 | 0.00 | D | N |
| ATOM | 16236 | CA  | HSD | A | 379 | -25.403 | 18.391 | -56.769 | 1.00 | 0.00 | D | C |
| ATOM | 16237 | CB  | HSD | A | 379 | -24.727 | 17.013 | -56.842 | 1.00 | 0.00 | D | C |
| ATOM | 16238 | ND1 | HSD | A | 379 | -26.393 | 15.115 | -56.562 | 1.00 | 0.00 | D | N |
| ATOM | 16239 | CG  | HSD | A | 379 | -25.607 | 15.920 | -57.355 | 1.00 | 0.00 | D | C |
| ATOM | 16240 | CE1 | HSD | A | 379 | -27.022 | 14.243 | -57.390 | 1.00 | 0.00 | D | C |
| ATOM | 16241 | NE2 | HSD | A | 379 | -26.697 | 14.433 | -58.657 | 1.00 | 0.00 | D | N |
| ATOM | 16242 | CD2 | HSD | A | 379 | -25.805 | 15.491 | -58.632 | 1.00 | 0.00 | D | C |
| ATOM | 16243 | C   | HSD | A | 379 | -26.435 | 18.341 | -55.681 | 1.00 | 0.00 | D | C |
| ATOM | 16244 | O   | HSD | A | 379 | -26.173 | 18.722 | -54.543 | 1.00 | 0.00 | D | O |



|      |       |     |           |         |        |         |      |      |   |   |
|------|-------|-----|-----------|---------|--------|---------|------|------|---|---|
| ATOM | 16245 | N   | SER A 380 | -27.658 | 17.882 | -56.022 | 1.00 | 0.00 | D | N |
| ATOM | 16246 | CA  | SER A 380 | -28.709 | 17.755 | -55.054 | 1.00 | 0.00 | D | C |
| ATOM | 16247 | CB  | SER A 380 | -29.844 | 18.778 | -55.223 | 1.00 | 0.00 | D | C |
| ATOM | 16248 | OG  | SER A 380 | -30.839 | 18.569 | -54.232 | 1.00 | 0.00 | D | O |
| ATOM | 16249 | C   | SER A 380 | -29.323 | 16.408 | -55.256 | 1.00 | 0.00 | D | C |
| ATOM | 16250 | O   | SER A 380 | -29.431 | 15.930 | -56.383 | 1.00 | 0.00 | D | O |
| ATOM | 16251 | N   | SER A 381 | -29.739 | 15.747 | -54.160 | 1.00 | 0.00 | D | N |
| ATOM | 16252 | CA  | SER A 381 | -30.332 | 14.453 | -54.326 | 1.00 | 0.00 | D | C |
| ATOM | 16253 | CB  | SER A 381 | -29.404 | 13.320 | -53.846 | 1.00 | 0.00 | D | C |
| ATOM | 16254 | OG  | SER A 381 | -30.009 | 12.049 | -54.016 | 1.00 | 0.00 | D | O |
| ATOM | 16255 | C   | SER A 381 | -31.577 | 14.413 | -53.503 | 1.00 | 0.00 | D | C |
| ATOM | 16256 | O   | SER A 381 | -31.608 | 14.945 | -52.396 | 1.00 | 0.00 | D | O |
| ATOM | 16257 | N   | LEU A 382 | -32.658 | 13.811 | -54.038 | 1.00 | 0.00 | D | N |
| ATOM | 16258 | CA  | LEU A 382 | -33.838 | 13.674 | -53.237 | 1.00 | 0.00 | D | C |
| ATOM | 16259 | CB  | LEU A 382 | -35.107 | 14.403 | -53.731 | 1.00 | 0.00 | D | C |
| ATOM | 16260 | CG  | LEU A 382 | -35.036 | 15.939 | -53.630 | 1.00 | 0.00 | D | C |
| ATOM | 16261 | CD1 | LEU A 382 | -33.954 | 16.514 | -54.555 | 1.00 | 0.00 | D | C |
| ATOM | 16262 | CD2 | LEU A 382 | -36.417 | 16.574 | -53.853 | 1.00 | 0.00 | D | C |
| ATOM | 16263 | C   | LEU A 382 | -34.145 | 12.220 | -53.104 | 1.00 | 0.00 | D | C |
| ATOM | 16264 | O   | LEU A 382 | -33.914 | 11.428 | -54.019 | 1.00 | 0.00 | D | O |
| ATOM | 16265 | N   | TYR A 383 | -34.666 | 11.841 | -51.919 | 1.00 | 0.00 | D | N |
| ATOM | 16266 | CA  | TYR A 383 | -34.965 | 10.466 | -51.635 | 1.00 | 0.00 | D | C |
| ATOM | 16267 | CB  | TYR A 383 | -34.136 | 9.931  | -50.468 | 1.00 | 0.00 | D | C |
| ATOM | 16268 | CG  | TYR A 383 | -32.726 | 9.978  | -50.956 | 1.00 | 0.00 | D | C |
| ATOM | 16269 | CD1 | TYR A 383 | -32.052 | 11.176 | -51.003 | 1.00 | 0.00 | D | C |
| ATOM | 16270 | CE1 | TYR A 383 | -30.757 | 11.238 | -51.463 | 1.00 | 0.00 | D | C |
| ATOM | 16271 | CZ  | TYR A 383 | -30.118 | 10.099 | -51.888 | 1.00 | 0.00 | D | C |
| ATOM | 16272 | OH  | TYR A 383 | -28.787 | 10.165 | -52.354 | 1.00 | 0.00 | D | O |
| ATOM | 16273 | CD2 | TYR A 383 | -32.088 | 8.843  | -51.408 | 1.00 | 0.00 | D | C |
| ATOM | 16274 | CE2 | TYR A 383 | -30.790 | 8.900  | -51.865 | 1.00 | 0.00 | D | C |
| ATOM | 16275 | C   | TYR A 383 | -36.433 | 10.383 | -51.340 | 1.00 | 0.00 | D | C |
| ATOM | 16276 | O   | TYR A 383 | -37.007 | 11.287 | -50.739 | 1.00 | 0.00 | D | O |
| ATOM | 16277 | N   | ASP A 384 | -37.089 | 9.287  | -51.779 | 1.00 | 0.00 | D | N |
| ATOM | 16278 | CA  | ASP A 384 | -38.524 | 9.225  | -51.696 | 1.00 | 0.00 | D | C |
| ATOM | 16279 | CB  | ASP A 384 | -39.109 | 7.874  | -52.137 | 1.00 | 0.00 | D | C |
| ATOM | 16280 | CG  | ASP A 384 | -40.600 | 8.003  | -52.374 | 1.00 | 0.00 | D | C |
| ATOM | 16281 | OD1 | ASP A 384 | -41.103 | 9.156  | -52.445 | 1.00 | 0.00 | D | O |
| ATOM | 16282 | OD2 | ASP A 384 | -41.255 | 6.934  | -52.501 | 1.00 | 0.00 | D | O |

|      |       |     |           |         |        |         |      |      |   |   |
|------|-------|-----|-----------|---------|--------|---------|------|------|---|---|
| ATOM | 16283 | C   | ASP A 384 | -38.891 | 9.340  | -50.290 | 1.00 | 0.00 | D | C |
| ATOM | 16284 | O   | ASP A 384 | -39.602 | 10.251 | -49.870 | 1.00 | 0.00 | D | O |
| ATOM | 16285 | N   | LEU A 385 | -38.311 | 8.367  | -49.593 | 1.00 | 0.00 | D | N |
| ATOM | 16286 | CA  | LEU A 385 | -38.221 | 8.009  | -48.250 | 1.00 | 0.00 | D | C |
| ATOM | 16287 | CB  | LEU A 385 | -38.139 | 9.221  | -47.312 | 1.00 | 0.00 | D | C |
| ATOM | 16288 | CG  | LEU A 385 | -37.414 | 8.905  | -45.995 | 1.00 | 0.00 | D | C |
| ATOM | 16289 | CD1 | LEU A 385 | -37.737 | 9.942  | -44.913 | 1.00 | 0.00 | D | C |
| ATOM | 16290 | CD2 | LEU A 385 | -37.566 | 7.447  | -45.571 | 1.00 | 0.00 | D | C |
| ATOM | 16291 | C   | LEU A 385 | -39.374 | 7.131  | -47.868 | 1.00 | 0.00 | D | C |
| ATOM | 16292 | O   | LEU A 385 | -40.281 | 7.557  | -47.155 | 1.00 | 0.00 | D | O |
| ATOM | 16293 | N   | SER A 386 | -39.349 | 5.867  | -48.338 | 1.00 | 0.00 | D | N |
| ATOM | 16294 | CA  | SER A 386 | -40.322 | 4.876  | -47.976 | 1.00 | 0.00 | D | C |
| ATOM | 16295 | CB  | SER A 386 | -40.327 | 3.668  | -48.932 | 1.00 | 0.00 | D | C |
| ATOM | 16296 | OG  | SER A 386 | -39.106 | 2.951  | -48.832 | 1.00 | 0.00 | D | O |
| ATOM | 16297 | C   | SER A 386 | -40.009 | 4.354  | -46.601 | 1.00 | 0.00 | D | C |
| ATOM | 16298 | O   | SER A 386 | -40.906 | 4.032  | -45.827 | 1.00 | 0.00 | D | O |
| ATOM | 16299 | N   | CYS A 387 | -38.710 | 4.312  | -46.256 | 1.00 | 0.00 | D | N |
| ATOM | 16300 | CA  | CYS A 387 | -38.185 | 3.718  | -45.054 | 1.00 | 0.00 | D | C |
| ATOM | 16301 | CB  | CYS A 387 | -36.708 | 4.088  | -44.891 | 1.00 | 0.00 | D | C |
| ATOM | 16302 | SG  | CYS A 387 | -35.769 | 3.815  | -46.418 | 1.00 | 0.00 | D | S |
| ATOM | 16303 | C   | CYS A 387 | -38.838 | 4.336  | -43.865 | 1.00 | 0.00 | D | C |
| ATOM | 16304 | O   | CYS A 387 | -39.269 | 3.651  | -42.940 | 1.00 | 0.00 | D | O |
| ATOM | 16305 | N   | ILE A 388 | -38.901 | 5.670  | -43.857 | 1.00 | 0.00 | D | N |
| ATOM | 16306 | CA  | ILE A 388 | -39.479 | 6.413  | -42.785 | 1.00 | 0.00 | D | C |
| ATOM | 16307 | CB  | ILE A 388 | -39.376 | 7.898  | -42.977 | 1.00 | 0.00 | D | C |
| ATOM | 16308 | CG2 | ILE A 388 | -40.092 | 8.265  | -44.289 | 1.00 | 0.00 | D | C |
| ATOM | 16309 | CG1 | ILE A 388 | -39.930 | 8.630  | -41.741 | 1.00 | 0.00 | D | C |
| ATOM | 16310 | CD  | ILE A 388 | -39.129 | 8.382  | -40.463 | 1.00 | 0.00 | D | C |
| ATOM | 16311 | C   | ILE A 388 | -40.925 | 6.060  | -42.723 | 1.00 | 0.00 | D | C |
| ATOM | 16312 | O   | ILE A 388 | -41.499 | 5.967  | -41.643 | 1.00 | 0.00 | D | O |
| ATOM | 16313 | N   | ASP A 389 | -41.546 | 5.871  | -43.901 | 1.00 | 0.00 | D | N |
| ATOM | 16314 | CA  | ASP A 389 | -42.950 | 5.620  | -43.996 | 1.00 | 0.00 | D | C |
| ATOM | 16315 | CB  | ASP A 389 | -43.443 | 5.556  | -45.452 | 1.00 | 0.00 | D | C |
| ATOM | 16316 | CG  | ASP A 389 | -43.371 | 6.957  | -46.047 | 1.00 | 0.00 | D | C |
| ATOM | 16317 | OD1 | ASP A 389 | -43.623 | 7.935  | -45.295 | 1.00 | 0.00 | D | O |
| ATOM | 16318 | OD2 | ASP A 389 | -43.061 | 7.064  | -47.263 | 1.00 | 0.00 | D | O |
| ATOM | 16319 | C   | ASP A 389 | -43.337 | 4.328  | -43.342 | 1.00 | 0.00 | D | C |
| ATOM | 16320 | O   | ASP A 389 | -44.344 | 4.284  | -42.641 | 1.00 | 0.00 | D | O |

|      |       |     |     |   |     |         |        |         |      |      |   |   |
|------|-------|-----|-----|---|-----|---------|--------|---------|------|------|---|---|
| ATOM | 16321 | N   | THR | A | 390 | -42.565 | 3.235  | -43.518 | 1.00 | 0.00 | D | N |
| ATOM | 16322 | CA  | THR | A | 390 | -43.107 | 2.011  | -43.008 | 1.00 | 0.00 | D | C |
| ATOM | 16323 | CB  | THR | A | 390 | -42.427 | 0.783  | -43.536 | 1.00 | 0.00 | D | C |
| ATOM | 16324 | OG1 | THR | A | 390 | -42.335 | 0.861  | -44.952 | 1.00 | 0.00 | D | O |
| ATOM | 16325 | CG2 | THR | A | 390 | -43.329 | -0.421 | -43.204 | 1.00 | 0.00 | D | C |
| ATOM | 16326 | C   | THR | A | 390 | -43.094 | 2.044  | -41.504 | 1.00 | 0.00 | D | C |
| ATOM | 16327 | O   | THR | A | 390 | -42.039 | 2.202  | -40.896 | 1.00 | 0.00 | D | O |
| ATOM | 16328 | N   | CYS | A | 391 | -44.286 | 2.165  | -40.869 | 1.00 | 0.00 | D | N |
| ATOM | 16329 | CA  | CYS | A | 391 | -44.414 | 2.057  | -39.434 | 1.00 | 0.00 | D | C |
| ATOM | 16330 | CB  | CYS | A | 391 | -45.416 | 3.071  | -38.857 | 1.00 | 0.00 | D | C |
| ATOM | 16331 | SG  | CYS | A | 391 | -45.509 | 2.986  | -37.043 | 1.00 | 0.00 | D | S |
| ATOM | 16332 | C   | CYS | A | 391 | -44.794 | 0.711  | -38.867 | 1.00 | 0.00 | D | C |
| ATOM | 16333 | O   | CYS | A | 391 | -44.102 | 0.150  | -38.020 | 1.00 | 0.00 | D | O |
| ATOM | 16334 | N   | GLU | A | 392 | -45.925 | 0.147  | -39.362 | 1.00 | 0.00 | D | N |
| ATOM | 16335 | CA  | GLU | A | 392 | -46.570 | -0.994 | -38.757 | 1.00 | 0.00 | D | C |
| ATOM | 16336 | CB  | GLU | A | 392 | -47.865 | -1.369 | -39.499 | 1.00 | 0.00 | D | C |
| ATOM | 16337 | CG  | GLU | A | 392 | -48.698 | -2.454 | -38.821 | 1.00 | 0.00 | D | C |
| ATOM | 16338 | CD  | GLU | A | 392 | -49.924 | -2.682 | -39.693 | 1.00 | 0.00 | D | C |
| ATOM | 16339 | OE1 | GLU | A | 392 | -49.833 | -2.405 | -40.918 | 1.00 | 0.00 | D | O |
| ATOM | 16340 | OE2 | GLU | A | 392 | -50.969 | -3.133 | -39.149 | 1.00 | 0.00 | D | O |
| ATOM | 16341 | C   | GLU | A | 392 | -45.655 | -2.160 | -38.802 | 1.00 | 0.00 | D | C |
| ATOM | 16342 | O   | GLU | A | 392 | -45.461 | -2.870 | -37.815 | 1.00 | 0.00 | D | O |
| ATOM | 16343 | N   | LYS | A | 393 | -45.068 | -2.376 | -39.984 | 1.00 | 0.00 | D | N |
| ATOM | 16344 | CA  | LYS | A | 393 | -44.102 | -3.405 | -40.155 | 1.00 | 0.00 | D | C |
| ATOM | 16345 | CB  | LYS | A | 393 | -43.934 | -3.766 | -41.638 | 1.00 | 0.00 | D | C |
| ATOM | 16346 | CG  | LYS | A | 393 | -45.248 | -4.338 | -42.183 | 1.00 | 0.00 | D | C |
| ATOM | 16347 | CD  | LYS | A | 393 | -45.402 | -4.318 | -43.705 | 1.00 | 0.00 | D | C |
| ATOM | 16348 | CE  | LYS | A | 393 | -46.763 | -4.847 | -44.164 | 1.00 | 0.00 | D | C |
| ATOM | 16349 | NZ  | LYS | A | 393 | -46.928 | -4.658 | -45.621 | 1.00 | 0.00 | D | N |
| ATOM | 16350 | C   | LYS | A | 393 | -42.845 | -2.836 | -39.585 | 1.00 | 0.00 | D | C |
| ATOM | 16351 | O   | LYS | A | 393 | -42.766 | -1.629 | -39.357 | 1.00 | 0.00 | D | O |
| ATOM | 16352 | N   | ASN | A | 394 | -41.845 | -3.688 | -39.293 | 1.00 | 0.00 | D | N |
| ATOM | 16353 | CA  | ASN | A | 394 | -40.643 | -3.170 | -38.708 | 1.00 | 0.00 | D | C |
| ATOM | 16354 | CB  | ASN | A | 394 | -39.579 | -4.254 | -38.466 | 1.00 | 0.00 | D | C |
| ATOM | 16355 | CG  | ASN | A | 394 | -40.082 | -5.124 | -37.325 | 1.00 | 0.00 | D | C |
| ATOM | 16356 | OD1 | ASN | A | 394 | -40.385 | -6.300 | -37.507 | 1.00 | 0.00 | D | O |
| ATOM | 16357 | ND2 | ASN | A | 394 | -40.185 | -4.521 | -36.109 | 1.00 | 0.00 | D | N |
| ATOM | 16358 | C   | ASN | A | 394 | -40.085 | -2.171 | -39.663 | 1.00 | 0.00 | D | C |

ATOM 16359 O ASN A 394 -39.694 -1.092 -39.244 1.00 0.00 D O  
ATOM 16360 N SER A 395 -40.019 -2.491 -40.967 1.00 0.00 D N  
ATOM 16361 CA SER A 395 -39.634 -1.519 -41.962 1.00 0.00 D C  
ATOM 16362 CB SER A 395 -40.201 -0.117 -41.716 1.00 0.00 D C  
ATOM 16363 OG SER A 395 -41.488 -0.280 -41.144 1.00 0.00 D O  
ATOM 16364 C SER A 395 -38.144 -1.428 -42.041 1.00 0.00 D C  
ATOM 16365 O SER A 395 -37.426 -1.972 -41.205 1.00 0.00 D O  
ATOM 16366 N VAL A 396 -37.641 -0.768 -43.102 1.00 0.00 D N  
ATOM 16367 CA VAL A 396 -36.222 -0.624 -43.224 1.00 0.00 D C  
ATOM 16368 CB VAL A 396 -35.776 -0.197 -44.591 1.00 0.00 D C  
ATOM 16369 CG1 VAL A 396 -36.346 1.186 -44.891 1.00 0.00 D C  
ATOM 16370 CG2 VAL A 396 -34.243 -0.292 -44.660 1.00 0.00 D C  
ATOM 16371 C VAL A 396 -35.716 0.309 -42.161 1.00 0.00 D C  
ATOM 16372 O VAL A 396 -34.677 0.062 -41.554 1.00 0.00 D O  
ATOM 16373 N LEU A 397 -36.438 1.417 -41.906 1.00 0.00 D N  
ATOM 16374 CA LEU A 397 -36.001 2.348 -40.901 1.00 0.00 D C  
ATOM 16375 CB LEU A 397 -36.825 3.644 -40.870 1.00 0.00 D C  
ATOM 16376 CG LEU A 397 -36.345 4.629 -39.787 1.00 0.00 D C  
ATOM 16377 CD1 LEU A 397 -34.882 5.041 -40.021 1.00 0.00 D C  
ATOM 16378 CD2 LEU A 397 -37.289 5.836 -39.671 1.00 0.00 D C  
ATOM 16379 C LEU A 397 -36.083 1.727 -39.541 1.00 0.00 D C  
ATOM 16380 O LEU A 397 -35.154 1.857 -38.749 1.00 0.00 D O  
ATOM 16381 N GLU A 398 -37.190 1.032 -39.199 1.00 0.00 D N  
ATOM 16382 CA GLU A 398 -37.178 0.531 -37.856 1.00 0.00 D C  
ATOM 16383 CB GLU A 398 -38.498 0.127 -37.180 1.00 0.00 D C  
ATOM 16384 CG GLU A 398 -39.426 1.301 -36.857 1.00 0.00 D C  
ATOM 16385 CD GLU A 398 -40.205 1.658 -38.112 1.00 0.00 D C  
ATOM 16386 OE1 GLU A 398 -41.135 0.887 -38.472 1.00 0.00 D O  
ATOM 16387 OE2 GLU A 398 -39.883 2.707 -38.731 1.00 0.00 D O  
ATOM 16388 C GLU A 398 -36.186 -0.569 -37.707 1.00 0.00 D C  
ATOM 16389 O GLU A 398 -35.602 -0.716 -36.637 1.00 0.00 D O  
ATOM 16390 N VAL A 399 -35.967 -1.389 -38.754 1.00 0.00 D N  
ATOM 16391 CA VAL A 399 -35.012 -2.444 -38.590 1.00 0.00 D C  
ATOM 16392 CB VAL A 399 -34.939 -3.389 -39.753 1.00 0.00 D C  
ATOM 16393 CG1 VAL A 399 -36.295 -4.103 -39.879 1.00 0.00 D C  
ATOM 16394 CG2 VAL A 399 -34.542 -2.614 -41.010 1.00 0.00 D C  
ATOM 16395 C VAL A 399 -33.666 -1.829 -38.350 1.00 0.00 D C  
ATOM 16396 O VAL A 399 -32.901 -2.310 -37.516 1.00 0.00 D O

ATOM 16397 N ILE A 400 -33.338 -0.733 -39.058 1.00 0.00 D N  
ATOM 16398 CA ILE A 400 -32.045 -0.152 -38.845 1.00 0.00 D C  
ATOM 16399 CB ILE A 400 -31.690 0.981 -39.760 1.00 0.00 D C  
ATOM 16400 CG2 ILE A 400 -32.526 2.217 -39.403 1.00 0.00 D C  
ATOM 16401 CG1 ILE A 400 -30.183 1.238 -39.652 1.00 0.00 D C  
ATOM 16402 CD ILE A 400 -29.680 2.251 -40.667 1.00 0.00 D C  
ATOM 16403 C ILE A 400 -31.953 0.352 -37.435 1.00 0.00 D C  
ATOM 16404 O ILE A 400 -30.913 0.226 -36.790 1.00 0.00 D O  
ATOM 16405 N ALA A 401 -33.038 0.963 -36.923 1.00 0.00 D N  
ATOM 16406 CA ALA A 401 -33.023 1.506 -35.593 1.00 0.00 D C  
ATOM 16407 CB ALA A 401 -34.349 2.169 -35.211 1.00 0.00 D C  
ATOM 16408 C ALA A 401 -32.836 0.416 -34.576 1.00 0.00 D C  
ATOM 16409 O ALA A 401 -32.055 0.563 -33.636 1.00 0.00 D O  
ATOM 16410 N TYR A 402 -33.603 -0.677 -34.731 1.00 0.00 D N  
ATOM 16411 CA TYR A 402 -33.685 -1.817 -33.854 1.00 0.00 D C  
ATOM 16412 CB TYR A 402 -34.952 -2.632 -34.201 1.00 0.00 D C  
ATOM 16413 CG TYR A 402 -35.157 -3.842 -33.348 1.00 0.00 D C  
ATOM 16414 CD1 TYR A 402 -35.646 -3.728 -32.066 1.00 0.00 D C  
ATOM 16415 CE1 TYR A 402 -35.853 -4.848 -31.291 1.00 0.00 D C  
ATOM 16416 CZ TYR A 402 -35.582 -6.097 -31.795 1.00 0.00 D C  
ATOM 16417 OH TYR A 402 -35.793 -7.247 -31.005 1.00 0.00 D O  
ATOM 16418 CD2 TYR A 402 -34.901 -5.098 -33.847 1.00 0.00 D C  
ATOM 16419 CE2 TYR A 402 -35.105 -6.221 -33.077 1.00 0.00 D C  
ATOM 16420 C TYR A 402 -32.482 -2.727 -33.903 1.00 0.00 D C  
ATOM 16421 O TYR A 402 -31.998 -3.176 -32.864 1.00 0.00 D O  
ATOM 16422 N SER A 403 -31.947 -3.000 -35.112 1.00 0.00 D N  
ATOM 16423 CA SER A 403 -30.981 -4.056 -35.313 1.00 0.00 D C  
ATOM 16424 CB SER A 403 -30.508 -4.180 -36.774 1.00 0.00 D C  
ATOM 16425 OG SER A 403 -31.600 -4.542 -37.606 1.00 0.00 D O  
ATOM 16426 C SER A 403 -29.750 -3.934 -34.465 1.00 0.00 D C  
ATOM 16427 O SER A 403 -29.176 -2.858 -34.317 1.00 0.00 D O  
ATOM 16428 N SER A 404 -29.310 -5.084 -33.899 1.00 0.00 D N  
ATOM 16429 CA SER A 404 -28.119 -5.115 -33.090 1.00 0.00 D C  
ATOM 16430 CB SER A 404 -28.367 -4.880 -31.588 1.00 0.00 D C  
ATOM 16431 OG SER A 404 -28.762 -3.541 -31.340 1.00 0.00 D O  
ATOM 16432 C SER A 404 -27.465 -6.457 -33.186 1.00 0.00 D C  
ATOM 16433 O SER A 404 -28.057 -7.448 -33.614 1.00 0.00 D O  
ATOM 16434 N SER A 405 -26.176 -6.486 -32.786 1.00 0.00 D N

|      |       |     |           |         |         |         |      |      |   |   |
|------|-------|-----|-----------|---------|---------|---------|------|------|---|---|
| ATOM | 16435 | CA  | SER A 405 | -25.386 | -7.675  | -32.644 | 1.00 | 0.00 | D | C |
| ATOM | 16436 | CB  | SER A 405 | -26.121 | -8.728  | -31.807 | 1.00 | 0.00 | D | C |
| ATOM | 16437 | OG  | SER A 405 | -26.519 | -8.151  | -30.576 | 1.00 | 0.00 | D | O |
| ATOM | 16438 | C   | SER A 405 | -25.079 | -8.309  | -33.965 | 1.00 | 0.00 | D | C |
| ATOM | 16439 | O   | SER A 405 | -24.428 | -9.352  | -34.006 | 1.00 | 0.00 | D | O |
| ATOM | 16440 | N   | GLU A 406 | -25.515 | -7.713  | -35.085 | 1.00 | 0.00 | D | N |
| ATOM | 16441 | CA  | GLU A 406 | -25.198 | -8.328  | -36.342 | 1.00 | 0.00 | D | C |
| ATOM | 16442 | CB  | GLU A 406 | -25.977 | -7.766  | -37.540 | 1.00 | 0.00 | D | C |
| ATOM | 16443 | CG  | GLU A 406 | -27.379 | -8.363  | -37.652 | 1.00 | 0.00 | D | C |
| ATOM | 16444 | CD  | GLU A 406 | -27.216 | -9.851  | -37.951 | 1.00 | 0.00 | D | C |
| ATOM | 16445 | OE1 | GLU A 406 | -26.051 | -10.295 | -38.134 | 1.00 | 0.00 | D | O |
| ATOM | 16446 | OE2 | GLU A 406 | -28.255 | -10.565 | -37.999 | 1.00 | 0.00 | D | O |
| ATOM | 16447 | C   | GLU A 406 | -23.737 | -8.196  | -36.620 | 1.00 | 0.00 | D | C |
| ATOM | 16448 | O   | GLU A 406 | -23.109 | -9.153  | -37.066 | 1.00 | 0.00 | D | O |
| ATOM | 16449 | N   | THR A 407 | -23.160 | -7.009  | -36.330 | 1.00 | 0.00 | D | N |
| ATOM | 16450 | CA  | THR A 407 | -21.787 | -6.630  | -36.577 | 1.00 | 0.00 | D | C |
| ATOM | 16451 | CB  | THR A 407 | -20.838 | -7.785  | -36.374 | 1.00 | 0.00 | D | C |
| ATOM | 16452 | OG1 | THR A 407 | -20.963 | -8.271  | -35.046 | 1.00 | 0.00 | D | O |
| ATOM | 16453 | CG2 | THR A 407 | -19.390 | -7.332  | -36.623 | 1.00 | 0.00 | D | C |
| ATOM | 16454 | C   | THR A 407 | -21.568 | -6.034  | -37.957 | 1.00 | 0.00 | D | C |
| ATOM | 16455 | O   | THR A 407 | -20.548 | -5.360  | -38.123 | 1.00 | 0.00 | D | O |
| ATOM | 16456 | N   | PRO A 408 | -22.391 | -6.200  | -38.968 | 1.00 | 0.00 | D | N |
| ATOM | 16457 | CD  | PRO A 408 | -22.711 | -7.567  | -39.353 | 1.00 | 0.00 | D | C |
| ATOM | 16458 | CA  | PRO A 408 | -22.210 | -5.405  | -40.165 | 1.00 | 0.00 | D | C |
| ATOM | 16459 | CB  | PRO A 408 | -22.746 | -6.222  | -41.339 | 1.00 | 0.00 | D | C |
| ATOM | 16460 | CG  | PRO A 408 | -22.588 | -7.667  | -40.875 | 1.00 | 0.00 | D | C |
| ATOM | 16461 | C   | PRO A 408 | -22.882 | -4.063  | -40.079 | 1.00 | 0.00 | D | C |
| ATOM | 16462 | O   | PRO A 408 | -22.904 | -3.355  | -41.085 | 1.00 | 0.00 | D | O |
| ATOM | 16463 | N   | ASN A 409 | -23.428 | -3.698  | -38.905 | 1.00 | 0.00 | D | N |
| ATOM | 16464 | CA  | ASN A 409 | -24.324 | -2.583  | -38.741 | 1.00 | 0.00 | D | C |
| ATOM | 16465 | CB  | ASN A 409 | -24.923 | -2.477  | -37.321 | 1.00 | 0.00 | D | C |
| ATOM | 16466 | CG  | ASN A 409 | -23.847 | -2.163  | -36.285 | 1.00 | 0.00 | D | C |
| ATOM | 16467 | OD1 | ASN A 409 | -23.114 | -1.178  | -36.372 | 1.00 | 0.00 | D | O |
| ATOM | 16468 | ND2 | ASN A 409 | -23.760 | -3.030  | -35.243 | 1.00 | 0.00 | D | N |
| ATOM | 16469 | C   | ASN A 409 | -23.783 | -1.233  | -39.105 | 1.00 | 0.00 | D | C |
| ATOM | 16470 | O   | ASN A 409 | -24.543 | -0.410  | -39.615 | 1.00 | 0.00 | D | O |
| ATOM | 16471 | N   | ARG A 410 | -22.480 | -0.970  | -38.900 | 1.00 | 0.00 | D | N |
| ATOM | 16472 | CA  | ARG A 410 | -21.922 | 0.345   | -39.061 | 1.00 | 0.00 | D | C |

|      |       |     |           |         |        |         |      |      |   |   |
|------|-------|-----|-----------|---------|--------|---------|------|------|---|---|
| ATOM | 16473 | CB  | ARG A 410 | -20.397 | 0.277  | -38.895 | 1.00 | 0.00 | D | C |
| ATOM | 16474 | CG  | ARG A 410 | -20.044 | -0.391 | -37.560 | 1.00 | 0.00 | D | C |
| ATOM | 16475 | CD  | ARG A 410 | -18.614 | -0.926 | -37.443 | 1.00 | 0.00 | D | C |
| ATOM | 16476 | NE  | ARG A 410 | -18.549 | -1.723 | -36.181 | 1.00 | 0.00 | D | N |
| ATOM | 16477 | CZ  | ARG A 410 | -17.903 | -2.928 | -36.156 | 1.00 | 0.00 | D | C |
| ATOM | 16478 | NH1 | ARG A 410 | -17.292 | -3.398 | -37.279 | 1.00 | 0.00 | D | N |
| ATOM | 16479 | NH2 | ARG A 410 | -17.870 | -3.663 | -35.003 | 1.00 | 0.00 | D | N |
| ATOM | 16480 | C   | ARG A 410 | -22.282 | 0.850  | -40.430 | 1.00 | 0.00 | D | C |
| ATOM | 16481 | O   | ARG A 410 | -22.654 | 2.011  | -40.593 | 1.00 | 0.00 | D | O |
| ATOM | 16482 | N   | HSD A 411 | -22.226 | -0.028 | -41.447 | 1.00 | 0.00 | D | N |
| ATOM | 16483 | CA  | HSD A 411 | -22.559 | 0.349  | -42.794 | 1.00 | 0.00 | D | C |
| ATOM | 16484 | CB  | HSD A 411 | -22.234 | -0.748 | -43.823 | 1.00 | 0.00 | D | C |
| ATOM | 16485 | ND1 | HSD A 411 | -20.114 | -2.048 | -43.295 | 1.00 | 0.00 | D | N |
| ATOM | 16486 | CG  | HSD A 411 | -20.765 | -1.019 | -43.938 | 1.00 | 0.00 | D | C |
| ATOM | 16487 | CE1 | HSD A 411 | -18.805 | -1.958 | -43.637 | 1.00 | 0.00 | D | C |
| ATOM | 16488 | NE2 | HSD A 411 | -18.568 | -0.946 | -44.454 | 1.00 | 0.00 | D | N |
| ATOM | 16489 | CD2 | HSD A 411 | -19.805 | -0.355 | -44.641 | 1.00 | 0.00 | D | C |
| ATOM | 16490 | C   | HSD A 411 | -24.021 | 0.686  | -42.947 | 1.00 | 0.00 | D | C |
| ATOM | 16491 | O   | HSD A 411 | -24.366 | 1.646  | -43.634 | 1.00 | 0.00 | D | O |
| ATOM | 16492 | N   | ASP A 412 | -24.925 | -0.094 | -42.324 | 1.00 | 0.00 | D | N |
| ATOM | 16493 | CA  | ASP A 412 | -26.347 | 0.072  | -42.509 | 1.00 | 0.00 | D | C |
| ATOM | 16494 | CB  | ASP A 412 | -27.150 | -0.981 | -41.724 | 1.00 | 0.00 | D | C |
| ATOM | 16495 | CG  | ASP A 412 | -26.831 | -2.369 | -42.260 | 1.00 | 0.00 | D | C |
| ATOM | 16496 | OD1 | ASP A 412 | -26.956 | -2.572 | -43.498 | 1.00 | 0.00 | D | O |
| ATOM | 16497 | OD2 | ASP A 412 | -26.449 | -3.243 | -41.437 | 1.00 | 0.00 | D | O |
| ATOM | 16498 | C   | ASP A 412 | -26.794 | 1.412  | -41.993 | 1.00 | 0.00 | D | C |
| ATOM | 16499 | O   | ASP A 412 | -27.577 | 2.108  | -42.637 | 1.00 | 0.00 | D | O |
| ATOM | 16500 | N   | MET A 413 | -26.306 | 1.806  | -40.803 | 1.00 | 0.00 | D | N |
| ATOM | 16501 | CA  | MET A 413 | -26.708 | 3.044  | -40.195 | 1.00 | 0.00 | D | C |
| ATOM | 16502 | CB  | MET A 413 | -26.102 | 3.258  | -38.799 | 1.00 | 0.00 | D | C |
| ATOM | 16503 | CG  | MET A 413 | -26.540 | 4.575  | -38.154 | 1.00 | 0.00 | D | C |
| ATOM | 16504 | SD  | MET A 413 | -28.294 | 4.622  | -37.681 | 1.00 | 0.00 | D | S |
| ATOM | 16505 | CE  | MET A 413 | -28.902 | 5.167  | -39.301 | 1.00 | 0.00 | D | C |
| ATOM | 16506 | C   | MET A 413 | -26.244 | 4.181  | -41.052 | 1.00 | 0.00 | D | C |
| ATOM | 16507 | O   | MET A 413 | -26.948 | 5.175  | -41.224 | 1.00 | 0.00 | D | O |
| ATOM | 16508 | N   | LEU A 414 | -25.045 | 4.037  | -41.634 | 1.00 | 0.00 | D | N |
| ATOM | 16509 | CA  | LEU A 414 | -24.399 | 5.053  | -42.414 | 1.00 | 0.00 | D | C |
| ATOM | 16510 | CB  | LEU A 414 | -23.002 | 4.645  | -42.900 | 1.00 | 0.00 | D | C |

|      |       |     |     |   |     |         |        |         |      |      |   |   |
|------|-------|-----|-----|---|-----|---------|--------|---------|------|------|---|---|
| ATOM | 16511 | CG  | LEU | A | 414 | -22.415 | 5.671  | -43.879 | 1.00 | 0.00 | D | C |
| ATOM | 16512 | CD1 | LEU | A | 414 | -22.301 | 7.058  | -43.231 | 1.00 | 0.00 | D | C |
| ATOM | 16513 | CD2 | LEU | A | 414 | -21.099 | 5.164  | -44.485 | 1.00 | 0.00 | D | C |
| ATOM | 16514 | C   | LEU | A | 414 | -25.185 | 5.394  | -43.639 | 1.00 | 0.00 | D | C |
| ATOM | 16515 | O   | LEU | A | 414 | -25.085 | 6.508  | -44.148 | 1.00 | 0.00 | D | O |
| ATOM | 16516 | N   | LEU | A | 415 | -25.986 | 4.440  | -44.145 | 1.00 | 0.00 | D | N |
| ATOM | 16517 | CA  | LEU | A | 415 | -26.657 | 4.576  | -45.408 | 1.00 | 0.00 | D | C |
| ATOM | 16518 | CB  | LEU | A | 415 | -27.666 | 3.438  | -45.659 | 1.00 | 0.00 | D | C |
| ATOM | 16519 | CG  | LEU | A | 415 | -28.386 | 3.526  | -47.016 | 1.00 | 0.00 | D | C |
| ATOM | 16520 | CD1 | LEU | A | 415 | -27.384 | 3.419  | -48.175 | 1.00 | 0.00 | D | C |
| ATOM | 16521 | CD2 | LEU | A | 415 | -29.514 | 2.491  | -47.124 | 1.00 | 0.00 | D | C |
| ATOM | 16522 | C   | LEU | A | 415 | -27.374 | 5.890  | -45.513 | 1.00 | 0.00 | D | C |
| ATOM | 16523 | O   | LEU | A | 415 | -28.002 | 6.368  | -44.569 | 1.00 | 0.00 | D | O |
| ATOM | 16524 | N   | VAL | A | 416 | -27.269 | 6.520  | -46.703 | 1.00 | 0.00 | D | N |
| ATOM | 16525 | CA  | VAL | A | 416 | -27.844 | 7.809  | -46.956 | 1.00 | 0.00 | D | C |
| ATOM | 16526 | CB  | VAL | A | 416 | -26.798 | 8.890  | -47.036 | 1.00 | 0.00 | D | C |
| ATOM | 16527 | CG1 | VAL | A | 416 | -26.042 | 8.939  | -45.698 | 1.00 | 0.00 | D | C |
| ATOM | 16528 | CG2 | VAL | A | 416 | -25.890 | 8.619  | -48.249 | 1.00 | 0.00 | D | C |
| ATOM | 16529 | C   | VAL | A | 416 | -28.506 | 7.743  | -48.299 | 1.00 | 0.00 | D | C |
| ATOM | 16530 | O   | VAL | A | 416 | -28.392 | 6.744  | -49.006 | 1.00 | 0.00 | D | O |
| ATOM | 16531 | N   | GLU | A | 417 | -29.221 | 8.809  | -48.701 | 1.00 | 0.00 | D | N |
| ATOM | 16532 | CA  | GLU | A | 417 | -29.393 | 9.977  | -47.895 | 1.00 | 0.00 | D | C |
| ATOM | 16533 | CB  | GLU | A | 417 | -29.952 | 11.191 | -48.643 | 1.00 | 0.00 | D | C |
| ATOM | 16534 | CG  | GLU | A | 417 | -29.938 | 12.472 | -47.803 | 1.00 | 0.00 | D | C |
| ATOM | 16535 | CD  | GLU | A | 417 | -28.480 | 12.858 | -47.569 | 1.00 | 0.00 | D | C |
| ATOM | 16536 | OE1 | GLU | A | 417 | -27.805 | 12.156 | -46.773 | 1.00 | 0.00 | D | O |
| ATOM | 16537 | OE2 | GLU | A | 417 | -28.024 | 13.858 | -48.185 | 1.00 | 0.00 | D | O |
| ATOM | 16538 | C   | GLU | A | 417 | -30.321 | 9.732  | -46.758 | 1.00 | 0.00 | D | C |
| ATOM | 16539 | O   | GLU | A | 417 | -30.026 | 10.214 | -45.679 | 1.00 | 0.00 | D | O |
| ATOM | 16540 | N   | PRO | A | 418 | -31.403 | 9.015  | -46.872 | 1.00 | 0.00 | D | N |
| ATOM | 16541 | CD  | PRO | A | 418 | -32.065 | 8.794  | -48.148 | 1.00 | 0.00 | D | C |
| ATOM | 16542 | CA  | PRO | A | 418 | -32.346 | 9.006  | -45.785 | 1.00 | 0.00 | D | C |
| ATOM | 16543 | CB  | PRO | A | 418 | -33.582 | 8.282  | -46.310 | 1.00 | 0.00 | D | C |
| ATOM | 16544 | CG  | PRO | A | 418 | -33.555 | 8.592  | -47.814 | 1.00 | 0.00 | D | C |
| ATOM | 16545 | C   | PRO | A | 418 | -31.918 | 8.528  | -44.444 | 1.00 | 0.00 | D | C |
| ATOM | 16546 | O   | PRO | A | 418 | -32.335 | 9.136  | -43.469 | 1.00 | 0.00 | D | O |
| ATOM | 16547 | N   | LEU | A | 419 | -31.119 | 7.468  | -44.307 | 1.00 | 0.00 | D | N |
| ATOM | 16548 | CA  | LEU | A | 419 | -30.864 | 7.069  | -42.953 | 1.00 | 0.00 | D | C |



|      |       |     |     |   |     |         |        |         |      |      |   |   |
|------|-------|-----|-----|---|-----|---------|--------|---------|------|------|---|---|
| ATOM | 16549 | CB  | LEU | A | 419 | -30.061 | 5.761  | -42.871 | 1.00 | 0.00 | D | C |
| ATOM | 16550 | CG  | LEU | A | 419 | -30.752 | 4.579  | -43.578 | 1.00 | 0.00 | D | C |
| ATOM | 16551 | CD1 | LEU | A | 419 | -29.948 | 3.281  | -43.412 | 1.00 | 0.00 | D | C |
| ATOM | 16552 | CD2 | LEU | A | 419 | -32.220 | 4.437  | -43.144 | 1.00 | 0.00 | D | C |
| ATOM | 16553 | C   | LEU | A | 419 | -30.091 | 8.156  | -42.267 | 1.00 | 0.00 | D | C |
| ATOM | 16554 | O   | LEU | A | 419 | -30.434 | 8.569  | -41.160 | 1.00 | 0.00 | D | O |
| ATOM | 16555 | N   | ASN | A | 420 | -29.033 | 8.667  | -42.918 | 1.00 | 0.00 | D | N |
| ATOM | 16556 | CA  | ASN | A | 420 | -28.257 | 9.725  | -42.330 | 1.00 | 0.00 | D | C |
| ATOM | 16557 | CB  | ASN | A | 420 | -26.961 | 10.013 | -43.110 | 1.00 | 0.00 | D | C |
| ATOM | 16558 | CG  | ASN | A | 420 | -26.202 | 11.149 | -42.426 | 1.00 | 0.00 | D | C |
| ATOM | 16559 | OD1 | ASN | A | 420 | -26.639 | 12.293 | -42.432 | 1.00 | 0.00 | D | O |
| ATOM | 16560 | ND2 | ASN | A | 420 | -25.023 | 10.818 | -41.826 | 1.00 | 0.00 | D | N |
| ATOM | 16561 | C   | ASN | A | 420 | -29.049 | 10.998 | -42.288 | 1.00 | 0.00 | D | C |
| ATOM | 16562 | O   | ASN | A | 420 | -29.106 | 11.682 | -41.269 | 1.00 | 0.00 | D | O |
| ATOM | 16563 | N   | ARG | A | 421 | -29.690 | 11.336 | -43.416 | 1.00 | 0.00 | D | N |
| ATOM | 16564 | CA  | ARG | A | 421 | -30.412 | 12.554 | -43.640 | 1.00 | 0.00 | D | C |
| ATOM | 16565 | CB  | ARG | A | 421 | -31.006 | 12.695 | -45.053 | 1.00 | 0.00 | D | C |
| ATOM | 16566 | CG  | ARG | A | 421 | -31.794 | 14.001 | -45.199 | 1.00 | 0.00 | D | C |
| ATOM | 16567 | CD  | ARG | A | 421 | -33.015 | 13.910 | -46.118 | 1.00 | 0.00 | D | C |
| ATOM | 16568 | NE  | ARG | A | 421 | -32.542 | 13.834 | -47.525 | 1.00 | 0.00 | D | N |
| ATOM | 16569 | CZ  | ARG | A | 421 | -33.451 | 13.960 | -48.538 | 1.00 | 0.00 | D | C |
| ATOM | 16570 | NH1 | ARG | A | 421 | -34.775 | 14.114 | -48.243 | 1.00 | 0.00 | D | N |
| ATOM | 16571 | NH2 | ARG | A | 421 | -33.037 | 13.934 | -49.839 | 1.00 | 0.00 | D | N |
| ATOM | 16572 | C   | ARG | A | 421 | -31.588 | 12.647 | -42.726 | 1.00 | 0.00 | D | C |
| ATOM | 16573 | O   | ARG | A | 421 | -31.840 | 13.690 | -42.131 | 1.00 | 0.00 | D | O |
| ATOM | 16574 | N   | LEU | A | 422 | -32.335 | 11.544 | -42.590 | 1.00 | 0.00 | D | N |
| ATOM | 16575 | CA  | LEU | A | 422 | -33.562 | 11.531 | -41.849 | 1.00 | 0.00 | D | C |
| ATOM | 16576 | CB  | LEU | A | 422 | -34.318 | 10.180 | -41.919 | 1.00 | 0.00 | D | C |
| ATOM | 16577 | CG  | LEU | A | 422 | -35.739 | 10.125 | -41.310 | 1.00 | 0.00 | D | C |
| ATOM | 16578 | CD1 | LEU | A | 422 | -36.393 | 8.759  | -41.577 | 1.00 | 0.00 | D | C |
| ATOM | 16579 | CD2 | LEU | A | 422 | -35.762 | 10.447 | -39.812 | 1.00 | 0.00 | D | C |
| ATOM | 16580 | C   | LEU | A | 422 | -33.262 | 11.843 | -40.420 | 1.00 | 0.00 | D | C |
| ATOM | 16581 | O   | LEU | A | 422 | -33.977 | 12.624 | -39.794 | 1.00 | 0.00 | D | O |
| ATOM | 16582 | N   | LEU | A | 423 | -32.193 | 11.250 | -39.861 | 1.00 | 0.00 | D | N |
| ATOM | 16583 | CA  | LEU | A | 423 | -31.910 | 11.469 | -38.471 | 1.00 | 0.00 | D | C |
| ATOM | 16584 | CB  | LEU | A | 423 | -30.770 | 10.593 | -37.924 | 1.00 | 0.00 | D | C |
| ATOM | 16585 | CG  | LEU | A | 423 | -31.211 | 9.149  | -37.611 | 1.00 | 0.00 | D | C |
| ATOM | 16586 | CD1 | LEU | A | 423 | -32.138 | 9.114  | -36.387 | 1.00 | 0.00 | D | C |

|      |       |     |     |   |     |         |        |         |      |      |   |   |
|------|-------|-----|-----|---|-----|---------|--------|---------|------|------|---|---|
| ATOM | 16587 | CD2 | LEU | A | 423 | -31.857 | 8.469  | -38.825 | 1.00 | 0.00 | D | C |
| ATOM | 16588 | C   | LEU | A | 423 | -31.589 | 12.907 | -38.204 | 1.00 | 0.00 | D | C |
| ATOM | 16589 | O   | LEU | A | 423 | -32.009 | 13.462 | -37.189 | 1.00 | 0.00 | D | O |
| ATOM | 16590 | N   | GLN | A | 424 | -30.843 | 13.557 | -39.110 | 1.00 | 0.00 | D | N |
| ATOM | 16591 | CA  | GLN | A | 424 | -30.456 | 14.920 | -38.880 | 1.00 | 0.00 | D | C |
| ATOM | 16592 | CB  | GLN | A | 424 | -29.573 | 15.465 | -40.018 | 1.00 | 0.00 | D | C |
| ATOM | 16593 | CG  | GLN | A | 424 | -29.085 | 16.897 | -39.801 | 1.00 | 0.00 | D | C |
| ATOM | 16594 | CD  | GLN | A | 424 | -28.081 | 16.863 | -38.661 | 1.00 | 0.00 | D | C |
| ATOM | 16595 | OE1 | GLN | A | 424 | -28.131 | 15.978 | -37.808 | 1.00 | 0.00 | D | O |
| ATOM | 16596 | NE2 | GLN | A | 424 | -27.140 | 17.847 | -38.646 | 1.00 | 0.00 | D | N |
| ATOM | 16597 | C   | GLN | A | 424 | -31.688 | 15.762 | -38.808 | 1.00 | 0.00 | D | C |
| ATOM | 16598 | O   | GLN | A | 424 | -31.816 | 16.633 | -37.949 | 1.00 | 0.00 | D | O |
| ATOM | 16599 | N   | ASP | A | 425 | -32.643 | 15.495 | -39.713 | 1.00 | 0.00 | D | N |
| ATOM | 16600 | CA  | ASP | A | 425 | -33.838 | 16.279 | -39.787 | 1.00 | 0.00 | D | C |
| ATOM | 16601 | CB  | ASP | A | 425 | -34.725 | 15.837 | -40.964 | 1.00 | 0.00 | D | C |
| ATOM | 16602 | CG  | ASP | A | 425 | -35.689 | 16.962 | -41.310 | 1.00 | 0.00 | D | C |
| ATOM | 16603 | OD1 | ASP | A | 425 | -36.242 | 17.589 | -40.370 | 1.00 | 0.00 | D | O |
| ATOM | 16604 | OD2 | ASP | A | 425 | -35.886 | 17.203 | -42.532 | 1.00 | 0.00 | D | O |
| ATOM | 16605 | C   | ASP | A | 425 | -34.613 | 16.113 | -38.517 | 1.00 | 0.00 | D | C |
| ATOM | 16606 | O   | ASP | A | 425 | -35.130 | 17.085 | -37.967 | 1.00 | 0.00 | D | O |
| ATOM | 16607 | N   | LYS | A | 426 | -34.723 | 14.870 | -38.014 | 1.00 | 0.00 | D | N |
| ATOM | 16608 | CA  | LYS | A | 426 | -35.500 | 14.654 | -36.826 | 1.00 | 0.00 | D | C |
| ATOM | 16609 | CB  | LYS | A | 426 | -35.726 | 13.170 | -36.491 | 1.00 | 0.00 | D | C |
| ATOM | 16610 | CG  | LYS | A | 426 | -36.775 | 12.497 | -37.378 | 1.00 | 0.00 | D | C |
| ATOM | 16611 | CD  | LYS | A | 426 | -36.879 | 10.989 | -37.143 | 1.00 | 0.00 | D | C |
| ATOM | 16612 | CE  | LYS | A | 426 | -38.015 | 10.319 | -37.917 | 1.00 | 0.00 | D | C |
| ATOM | 16613 | NZ  | LYS | A | 426 | -37.833 | 8.850  | -37.900 | 1.00 | 0.00 | D | N |
| ATOM | 16614 | C   | LYS | A | 426 | -34.880 | 15.293 | -35.614 | 1.00 | 0.00 | D | C |
| ATOM | 16615 | O   | LYS | A | 426 | -35.576 | 15.930 | -34.825 | 1.00 | 0.00 | D | O |
| ATOM | 16616 | N   | TRP | A | 427 | -33.566 | 15.089 | -35.409 | 1.00 | 0.00 | D | N |
| ATOM | 16617 | CA  | TRP | A | 427 | -32.875 | 15.544 | -34.228 | 1.00 | 0.00 | D | C |
| ATOM | 16618 | CB  | TRP | A | 427 | -31.532 | 14.793 | -34.035 | 1.00 | 0.00 | D | C |
| ATOM | 16619 | CG  | TRP | A | 427 | -30.880 | 14.942 | -32.674 | 1.00 | 0.00 | D | C |
| ATOM | 16620 | CD1 | TRP | A | 427 | -31.329 | 14.449 | -31.490 | 1.00 | 0.00 | D | C |
| ATOM | 16621 | NE1 | TRP | A | 427 | -30.462 | 14.765 | -30.476 | 1.00 | 0.00 | D | N |
| ATOM | 16622 | CE2 | TRP | A | 427 | -29.405 | 15.460 | -31.010 | 1.00 | 0.00 | D | C |
| ATOM | 16623 | CD2 | TRP | A | 427 | -29.625 | 15.586 | -32.385 | 1.00 | 0.00 | D | C |
| ATOM | 16624 | CE3 | TRP | A | 427 | -28.728 | 16.224 | -33.189 | 1.00 | 0.00 | D | C |

|      |       |     |     |       |         |        |         |      |      |   |   |
|------|-------|-----|-----|-------|---------|--------|---------|------|------|---|---|
| ATOM | 16625 | CZ3 | TRP | A 427 | -27.601 | 16.745 | -32.588 | 1.00 | 0.00 | D | C |
| ATOM | 16626 | CZ2 | TRP | A 427 | -28.284 | 15.972 | -30.420 | 1.00 | 0.00 | D | C |
| ATOM | 16627 | CH2 | TRP | A 427 | -27.384 | 16.625 | -31.231 | 1.00 | 0.00 | D | C |
| ATOM | 16628 | C   | TRP | A 427 | -32.603 | 17.011 | -34.224 | 1.00 | 0.00 | D | C |
| ATOM | 16629 | O   | TRP | A 427 | -32.885 | 17.697 | -33.243 | 1.00 | 0.00 | D | O |
| ATOM | 16630 | N   | ASP | A 428 | -32.068 | 17.532 | -35.343 | 1.00 | 0.00 | D | N |
| ATOM | 16631 | CA  | ASP | A 428 | -31.612 | 18.886 | -35.369 | 1.00 | 0.00 | D | C |
| ATOM | 16632 | CB  | ASP | A 428 | -31.100 | 19.300 | -36.761 | 1.00 | 0.00 | D | C |
| ATOM | 16633 | CG  | ASP | A 428 | -30.496 | 20.699 | -36.698 | 1.00 | 0.00 | D | C |
| ATOM | 16634 | OD1 | ASP | A 428 | -30.595 | 21.357 | -35.625 | 1.00 | 0.00 | D | O |
| ATOM | 16635 | OD2 | ASP | A 428 | -29.916 | 21.126 | -37.731 | 1.00 | 0.00 | D | O |
| ATOM | 16636 | C   | ASP | A 428 | -32.749 | 19.770 | -35.029 | 1.00 | 0.00 | D | C |
| ATOM | 16637 | O   | ASP | A 428 | -32.610 | 20.662 | -34.194 | 1.00 | 0.00 | D | O |
| ATOM | 16638 | N   | ARG | A 429 | -33.910 | 19.572 | -35.669 | 1.00 | 0.00 | D | N |
| ATOM | 16639 | CA  | ARG | A 429 | -34.897 | 20.520 | -35.296 | 1.00 | 0.00 | D | C |
| ATOM | 16640 | CB  | ARG | A 429 | -36.142 | 20.508 | -36.198 | 1.00 | 0.00 | D | C |
| ATOM | 16641 | CG  | ARG | A 429 | -36.856 | 19.163 | -36.296 | 1.00 | 0.00 | D | C |
| ATOM | 16642 | CD  | ARG | A 429 | -38.088 | 19.210 | -37.204 | 1.00 | 0.00 | D | C |
| ATOM | 16643 | NE  | ARG | A 429 | -37.629 | 19.669 | -38.544 | 1.00 | 0.00 | D | N |
| ATOM | 16644 | CZ  | ARG | A 429 | -38.495 | 20.313 | -39.382 | 1.00 | 0.00 | D | C |
| ATOM | 16645 | NH1 | ARG | A 429 | -39.776 | 20.563 | -38.983 | 1.00 | 0.00 | D | N |
| ATOM | 16646 | NH2 | ARG | A 429 | -38.072 | 20.711 | -40.618 | 1.00 | 0.00 | D | N |
| ATOM | 16647 | C   | ARG | A 429 | -35.317 | 20.369 | -33.858 | 1.00 | 0.00 | D | C |
| ATOM | 16648 | O   | ARG | A 429 | -35.095 | 21.280 | -33.066 | 1.00 | 0.00 | D | O |
| ATOM | 16649 | N   | PHE | A 430 | -35.995 | 19.250 | -33.509 | 1.00 | 0.00 | D | N |
| ATOM | 16650 | CA  | PHE | A 430 | -36.495 | 19.007 | -32.174 | 1.00 | 0.00 | D | C |
| ATOM | 16651 | CB  | PHE | A 430 | -37.964 | 18.541 | -32.190 | 1.00 | 0.00 | D | C |
| ATOM | 16652 | CG  | PHE | A 430 | -38.082 | 17.391 | -33.130 | 1.00 | 0.00 | D | C |
| ATOM | 16653 | CD1 | PHE | A 430 | -37.777 | 16.116 | -32.727 | 1.00 | 0.00 | D | C |
| ATOM | 16654 | CE1 | PHE | A 430 | -37.885 | 15.069 | -33.610 | 1.00 | 0.00 | D | C |
| ATOM | 16655 | CZ  | PHE | A 430 | -38.301 | 15.279 | -34.902 | 1.00 | 0.00 | D | C |
| ATOM | 16656 | CD2 | PHE | A 430 | -38.496 | 17.592 | -34.426 | 1.00 | 0.00 | D | C |
| ATOM | 16657 | CE2 | PHE | A 430 | -38.605 | 16.551 | -35.316 | 1.00 | 0.00 | D | C |
| ATOM | 16658 | C   | PHE | A 430 | -35.741 | 18.126 | -31.197 | 1.00 | 0.00 | D | C |
| ATOM | 16659 | O   | PHE | A 430 | -35.664 | 18.444 | -30.010 | 1.00 | 0.00 | D | O |
| ATOM | 16660 | N   | VAL | A 431 | -35.162 | 16.999 | -31.665 | 1.00 | 0.00 | D | N |
| ATOM | 16661 | CA  | VAL | A 431 | -34.788 | 15.906 | -30.790 | 1.00 | 0.00 | D | C |
| ATOM | 16662 | CB  | VAL | A 431 | -34.259 | 14.703 | -31.507 | 1.00 | 0.00 | D | C |

|      |       |               |         |        |         |      |      |   |   |
|------|-------|---------------|---------|--------|---------|------|------|---|---|
| ATOM | 16663 | CG1 VAL A 431 | -33.948 | 13.627 | -30.449 | 1.00 | 0.00 | D | C |
| ATOM | 16664 | CG2 VAL A 431 | -35.246 | 14.269 | -32.594 | 1.00 | 0.00 | D | C |
| ATOM | 16665 | C VAL A 431   | -33.756 | 16.240 | -29.764 | 1.00 | 0.00 | D | C |
| ATOM | 16666 | O VAL A 431   | -33.856 | 15.801 | -28.620 | 1.00 | 0.00 | D | O |
| ATOM | 16667 | N LYS A 432   | -32.722 | 17.008 | -30.132 | 1.00 | 0.00 | D | N |
| ATOM | 16668 | CA LYS A 432  | -31.659 | 17.253 | -29.210 | 1.00 | 0.00 | D | C |
| ATOM | 16669 | CB LYS A 432  | -30.584 | 18.183 | -29.794 | 1.00 | 0.00 | D | C |
| ATOM | 16670 | CG LYS A 432  | -31.134 | 19.547 | -30.214 | 1.00 | 0.00 | D | C |
| ATOM | 16671 | CD LYS A 432  | -30.051 | 20.564 | -30.582 | 1.00 | 0.00 | D | C |
| ATOM | 16672 | CE LYS A 432  | -30.611 | 21.889 | -31.100 | 1.00 | 0.00 | D | C |
| ATOM | 16673 | NZ LYS A 432  | -29.501 | 22.795 | -31.465 | 1.00 | 0.00 | D | N |
| ATOM | 16674 | C LYS A 432   | -32.215 | 17.900 | -27.987 | 1.00 | 0.00 | D | C |
| ATOM | 16675 | O LYS A 432   | -31.814 | 17.578 | -26.869 | 1.00 | 0.00 | D | O |
| ATOM | 16676 | N ARG A 433   | -33.175 | 18.818 | -28.163 | 1.00 | 0.00 | D | N |
| ATOM | 16677 | CA ARG A 433  | -33.729 | 19.536 | -27.056 | 1.00 | 0.00 | D | C |
| ATOM | 16678 | CB ARG A 433  | -34.718 | 20.626 | -27.499 | 1.00 | 0.00 | D | C |
| ATOM | 16679 | CG ARG A 433  | -35.122 | 21.570 | -26.364 | 1.00 | 0.00 | D | C |
| ATOM | 16680 | CD ARG A 433  | -35.695 | 22.899 | -26.857 | 1.00 | 0.00 | D | C |
| ATOM | 16681 | NE ARG A 433  | -34.638 | 23.542 | -27.690 | 1.00 | 0.00 | D | N |
| ATOM | 16682 | CZ ARG A 433  | -33.662 | 24.293 | -27.099 | 1.00 | 0.00 | D | C |
| ATOM | 16683 | NH1 ARG A 433 | -33.690 | 24.515 | -25.754 | 1.00 | 0.00 | D | N |
| ATOM | 16684 | NH2 ARG A 433 | -32.652 | 24.810 | -27.859 | 1.00 | 0.00 | D | N |
| ATOM | 16685 | C ARG A 433   | -34.437 | 18.602 | -26.120 | 1.00 | 0.00 | D | C |
| ATOM | 16686 | O ARG A 433   | -34.329 | 18.752 | -24.903 | 1.00 | 0.00 | D | O |
| ATOM | 16687 | N ILE A 434   | -35.171 | 17.603 | -26.655 | 1.00 | 0.00 | D | N |
| ATOM | 16688 | CA ILE A 434  | -35.971 | 16.728 | -25.837 | 1.00 | 0.00 | D | C |
| ATOM | 16689 | CB ILE A 434  | -36.825 | 15.764 | -26.618 | 1.00 | 0.00 | D | C |
| ATOM | 16690 | CG2 ILE A 434 | -37.651 | 16.606 | -27.597 | 1.00 | 0.00 | D | C |
| ATOM | 16691 | CG1 ILE A 434 | -35.996 | 14.691 | -27.337 | 1.00 | 0.00 | D | C |
| ATOM | 16692 | CD ILE A 434  | -36.840 | 13.546 | -27.897 | 1.00 | 0.00 | D | C |
| ATOM | 16693 | C ILE A 434   | -35.100 | 15.909 | -24.936 | 1.00 | 0.00 | D | C |
| ATOM | 16694 | O ILE A 434   | -35.425 | 15.692 | -23.770 | 1.00 | 0.00 | D | O |
| ATOM | 16695 | N PHE A 435   | -33.968 | 15.423 | -25.468 | 1.00 | 0.00 | D | N |
| ATOM | 16696 | CA PHE A 435  | -33.068 | 14.540 | -24.785 | 1.00 | 0.00 | D | C |
| ATOM | 16697 | CB PHE A 435  | -31.982 | 14.070 | -25.766 | 1.00 | 0.00 | D | C |
| ATOM | 16698 | CG PHE A 435  | -31.125 | 13.055 | -25.114 | 1.00 | 0.00 | D | C |
| ATOM | 16699 | CD1 PHE A 435 | -31.666 | 11.901 | -24.595 | 1.00 | 0.00 | D | C |
| ATOM | 16700 | CE1 PHE A 435 | -30.861 | 10.956 | -24.003 | 1.00 | 0.00 | D | C |

|      |       |     |           |         |        |         |      |      |   |   |
|------|-------|-----|-----------|---------|--------|---------|------|------|---|---|
| ATOM | 16701 | CZ  | PHE A 435 | -29.505 | 11.160 | -23.952 | 1.00 | 0.00 | D | C |
| ATOM | 16702 | CD2 | PHE A 435 | -29.769 | 13.245 | -25.082 | 1.00 | 0.00 | D | C |
| ATOM | 16703 | CE2 | PHE A 435 | -28.967 | 12.302 | -24.499 | 1.00 | 0.00 | D | C |
| ATOM | 16704 | C   | PHE A 435 | -32.462 | 15.205 | -23.581 | 1.00 | 0.00 | D | C |
| ATOM | 16705 | O   | PHE A 435 | -32.370 | 14.596 | -22.514 | 1.00 | 0.00 | D | O |
| ATOM | 16706 | N   | TYR A 436 | -32.048 | 16.478 | -23.708 | 1.00 | 0.00 | D | N |
| ATOM | 16707 | CA  | TYR A 436 | -31.432 | 17.183 | -22.616 | 1.00 | 0.00 | D | C |
| ATOM | 16708 | CB  | TYR A 436 | -31.023 | 18.623 | -22.968 | 1.00 | 0.00 | D | C |
| ATOM | 16709 | CG  | TYR A 436 | -29.808 | 18.580 | -23.825 | 1.00 | 0.00 | D | C |
| ATOM | 16710 | CD1 | TYR A 436 | -28.564 | 18.502 | -23.240 | 1.00 | 0.00 | D | C |
| ATOM | 16711 | CE1 | TYR A 436 | -27.427 | 18.468 | -24.006 | 1.00 | 0.00 | D | C |
| ATOM | 16712 | CZ  | TYR A 436 | -27.531 | 18.512 | -25.374 | 1.00 | 0.00 | D | C |
| ATOM | 16713 | OH  | TYR A 436 | -26.367 | 18.482 | -26.167 | 1.00 | 0.00 | D | O |
| ATOM | 16714 | CD2 | TYR A 436 | -29.904 | 18.619 | -25.195 | 1.00 | 0.00 | D | C |
| ATOM | 16715 | CE2 | TYR A 436 | -28.767 | 18.585 | -25.970 | 1.00 | 0.00 | D | C |
| ATOM | 16716 | C   | TYR A 436 | -32.396 | 17.277 | -21.479 | 1.00 | 0.00 | D | C |
| ATOM | 16717 | O   | TYR A 436 | -32.013 | 17.121 | -20.321 | 1.00 | 0.00 | D | O |
| ATOM | 16718 | N   | PHE A 437 | -33.680 | 17.536 | -21.782 | 1.00 | 0.00 | D | N |
| ATOM | 16719 | CA  | PHE A 437 | -34.657 | 17.666 | -20.743 | 1.00 | 0.00 | D | C |
| ATOM | 16720 | CB  | PHE A 437 | -36.074 | 17.958 | -21.274 | 1.00 | 0.00 | D | C |
| ATOM | 16721 | CG  | PHE A 437 | -37.010 | 18.008 | -20.112 | 1.00 | 0.00 | D | C |
| ATOM | 16722 | CD1 | PHE A 437 | -37.156 | 19.157 | -19.369 | 1.00 | 0.00 | D | C |
| ATOM | 16723 | CE1 | PHE A 437 | -38.019 | 19.195 | -18.299 | 1.00 | 0.00 | D | C |
| ATOM | 16724 | CZ  | PHE A 437 | -38.746 | 18.081 | -17.956 | 1.00 | 0.00 | D | C |
| ATOM | 16725 | CD2 | PHE A 437 | -37.736 | 16.894 | -19.757 | 1.00 | 0.00 | D | C |
| ATOM | 16726 | CE2 | PHE A 437 | -38.604 | 16.927 | -18.689 | 1.00 | 0.00 | D | C |
| ATOM | 16727 | C   | PHE A 437 | -34.697 | 16.376 | -19.993 | 1.00 | 0.00 | D | C |
| ATOM | 16728 | O   | PHE A 437 | -34.752 | 16.370 | -18.765 | 1.00 | 0.00 | D | O |
| ATOM | 16729 | N   | ASN A 438 | -34.650 | 15.245 | -20.717 | 1.00 | 0.00 | D | N |
| ATOM | 16730 | CA  | ASN A 438 | -34.719 | 13.970 | -20.066 | 1.00 | 0.00 | D | C |
| ATOM | 16731 | CB  | ASN A 438 | -34.615 | 12.793 | -21.055 | 1.00 | 0.00 | D | C |
| ATOM | 16732 | CG  | ASN A 438 | -35.808 | 12.841 | -21.996 | 1.00 | 0.00 | D | C |
| ATOM | 16733 | OD1 | ASN A 438 | -36.828 | 13.458 | -21.694 | 1.00 | 0.00 | D | O |
| ATOM | 16734 | ND2 | ASN A 438 | -35.682 | 12.170 | -23.174 | 1.00 | 0.00 | D | N |
| ATOM | 16735 | C   | ASN A 438 | -33.552 | 13.852 | -19.134 | 1.00 | 0.00 | D | C |
| ATOM | 16736 | O   | ASN A 438 | -33.705 | 13.444 | -17.985 | 1.00 | 0.00 | D | O |
| ATOM | 16737 | N   | PHE A 439 | -32.349 | 14.229 | -19.608 | 1.00 | 0.00 | D | N |
| ATOM | 16738 | CA  | PHE A 439 | -31.147 | 14.099 | -18.831 | 1.00 | 0.00 | D | C |

|      |       |     |           |         |        |         |      |      |   |   |
|------|-------|-----|-----------|---------|--------|---------|------|------|---|---|
| ATOM | 16739 | CB  | PHE A 439 | -29.885 | 14.497 | -19.622 | 1.00 | 0.00 | D | C |
| ATOM | 16740 | CG  | PHE A 439 | -28.723 | 14.625 | -18.689 | 1.00 | 0.00 | D | C |
| ATOM | 16741 | CD1 | PHE A 439 | -28.233 | 13.540 | -18.000 | 1.00 | 0.00 | D | C |
| ATOM | 16742 | CE1 | PHE A 439 | -27.157 | 13.673 | -17.153 | 1.00 | 0.00 | D | C |
| ATOM | 16743 | CZ  | PHE A 439 | -26.547 | 14.893 | -16.995 | 1.00 | 0.00 | D | C |
| ATOM | 16744 | CD2 | PHE A 439 | -28.095 | 15.840 | -18.535 | 1.00 | 0.00 | D | C |
| ATOM | 16745 | CE2 | PHE A 439 | -27.018 | 15.979 | -17.691 | 1.00 | 0.00 | D | C |
| ATOM | 16746 | C   | PHE A 439 | -31.220 | 14.941 | -17.598 | 1.00 | 0.00 | D | C |
| ATOM | 16747 | O   | PHE A 439 | -30.905 | 14.477 | -16.504 | 1.00 | 0.00 | D | O |
| ATOM | 16748 | N   | LEU A 440 | -31.652 | 16.207 | -17.736 | 1.00 | 0.00 | D | N |
| ATOM | 16749 | CA  | LEU A 440 | -31.673 | 17.080 | -16.600 | 1.00 | 0.00 | D | C |
| ATOM | 16750 | CB  | LEU A 440 | -32.077 | 18.524 | -16.946 | 1.00 | 0.00 | D | C |
| ATOM | 16751 | CG  | LEU A 440 | -31.061 | 19.230 | -17.864 | 1.00 | 0.00 | D | C |
| ATOM | 16752 | CD1 | LEU A 440 | -31.461 | 20.690 | -18.129 | 1.00 | 0.00 | D | C |
| ATOM | 16753 | CD2 | LEU A 440 | -29.630 | 19.087 | -17.321 | 1.00 | 0.00 | D | C |
| ATOM | 16754 | C   | LEU A 440 | -32.637 | 16.559 | -15.583 | 1.00 | 0.00 | D | C |
| ATOM | 16755 | O   | LEU A 440 | -32.334 | 16.546 | -14.391 | 1.00 | 0.00 | D | O |
| ATOM | 16756 | N   | VAL A 441 | -33.816 | 16.088 | -16.029 | 1.00 | 0.00 | D | N |
| ATOM | 16757 | CA  | VAL A 441 | -34.819 | 15.631 | -15.108 | 1.00 | 0.00 | D | C |
| ATOM | 16758 | CB  | VAL A 441 | -36.071 | 15.156 | -15.778 | 1.00 | 0.00 | D | C |
| ATOM | 16759 | CG1 | VAL A 441 | -37.014 | 14.576 | -14.710 | 1.00 | 0.00 | D | C |
| ATOM | 16760 | CG2 | VAL A 441 | -36.674 | 16.338 | -16.546 | 1.00 | 0.00 | D | C |
| ATOM | 16761 | C   | VAL A 441 | -34.275 | 14.478 | -14.329 | 1.00 | 0.00 | D | C |
| ATOM | 16762 | O   | VAL A 441 | -34.510 | 14.360 | -13.128 | 1.00 | 0.00 | D | O |
| ATOM | 16763 | N   | TYR A 442 | -33.522 | 13.596 | -15.008 | 1.00 | 0.00 | D | N |
| ATOM | 16764 | CA  | TYR A 442 | -32.965 | 12.419 | -14.409 | 1.00 | 0.00 | D | C |
| ATOM | 16765 | CB  | TYR A 442 | -32.198 | 11.580 | -15.446 | 1.00 | 0.00 | D | C |
| ATOM | 16766 | CG  | TYR A 442 | -31.609 | 10.384 | -14.780 | 1.00 | 0.00 | D | C |
| ATOM | 16767 | CD1 | TYR A 442 | -32.334 | 9.220  | -14.659 | 1.00 | 0.00 | D | C |
| ATOM | 16768 | CE1 | TYR A 442 | -31.791 | 8.114  | -14.051 | 1.00 | 0.00 | D | C |
| ATOM | 16769 | CZ  | TYR A 442 | -30.512 | 8.166  | -13.556 | 1.00 | 0.00 | D | C |
| ATOM | 16770 | OH  | TYR A 442 | -29.947 | 7.035  | -12.929 | 1.00 | 0.00 | D | O |
| ATOM | 16771 | CD2 | TYR A 442 | -30.330 | 10.428 | -14.274 | 1.00 | 0.00 | D | C |
| ATOM | 16772 | CE2 | TYR A 442 | -29.783 | 9.326  | -13.664 | 1.00 | 0.00 | D | C |
| ATOM | 16773 | C   | TYR A 442 | -32.014 | 12.818 | -13.324 | 1.00 | 0.00 | D | C |
| ATOM | 16774 | O   | TYR A 442 | -32.001 | 12.212 | -12.252 | 1.00 | 0.00 | D | O |
| ATOM | 16775 | N   | CYS A 443 | -31.212 | 13.869 | -13.563 | 1.00 | 0.00 | D | N |
| ATOM | 16776 | CA  | CYS A 443 | -30.197 | 14.275 | -12.631 | 1.00 | 0.00 | D | C |

|            |     |           |         |        |         |      |      |   |   |
|------------|-----|-----------|---------|--------|---------|------|------|---|---|
| ATOM 16777 | CB  | CYS A 443 | -29.421 | 15.510 | -13.111 | 1.00 | 0.00 | D | C |
| ATOM 16778 | SG  | CYS A 443 | -28.608 | 15.214 | -14.706 | 1.00 | 0.00 | D | S |
| ATOM 16779 | C   | CYS A 443 | -30.829 | 14.636 | -11.319 | 1.00 | 0.00 | D | C |
| ATOM 16780 | O   | CYS A 443 | -30.312 | 14.286 | -10.260 | 1.00 | 0.00 | D | O |
| ATOM 16781 | N   | LEU A 444 | -31.975 | 15.333 | -11.362 | 1.00 | 0.00 | D | N |
| ATOM 16782 | CA  | LEU A 444 | -32.679 | 15.782 | -10.191 | 1.00 | 0.00 | D | C |
| ATOM 16783 | CB  | LEU A 444 | -33.928 | 16.590 | -10.600 | 1.00 | 0.00 | D | C |
| ATOM 16784 | CG  | LEU A 444 | -34.855 | 17.064 | -9.466  | 1.00 | 0.00 | D | C |
| ATOM 16785 | CD1 | LEU A 444 | -35.680 | 15.901 | -8.894  | 1.00 | 0.00 | D | C |
| ATOM 16786 | CD2 | LEU A 444 | -34.084 | 17.843 | -8.393  | 1.00 | 0.00 | D | C |
| ATOM 16787 | C   | LEU A 444 | -33.091 | 14.584 | -9.391  | 1.00 | 0.00 | D | C |
| ATOM 16788 | O   | LEU A 444 | -33.037 | 14.575 | -8.163  | 1.00 | 0.00 | D | O |
| ATOM 16789 | N   | TYR A 445 | -33.510 | 13.516 | -10.075 | 1.00 | 0.00 | D | N |
| ATOM 16790 | CA  | TYR A 445 | -33.937 | 12.340 | -9.386  | 1.00 | 0.00 | D | C |
| ATOM 16791 | CB  | TYR A 445 | -34.402 | 11.268 | -10.393 | 1.00 | 0.00 | D | C |
| ATOM 16792 | CG  | TYR A 445 | -34.582 | 9.947  | -9.733  | 1.00 | 0.00 | D | C |
| ATOM 16793 | CD1 | TYR A 445 | -35.747 | 9.637  | -9.072  | 1.00 | 0.00 | D | C |
| ATOM 16794 | CE1 | TYR A 445 | -35.903 | 8.409  | -8.470  | 1.00 | 0.00 | D | C |
| ATOM 16795 | CZ  | TYR A 445 | -34.891 | 7.480  | -8.523  | 1.00 | 0.00 | D | C |
| ATOM 16796 | OH  | TYR A 445 | -35.051 | 6.220  | -7.908  | 1.00 | 0.00 | D | O |
| ATOM 16797 | CD2 | TYR A 445 | -33.574 | 9.008  | -9.777  | 1.00 | 0.00 | D | C |
| ATOM 16798 | CE2 | TYR A 445 | -33.725 | 7.780  | -9.178  | 1.00 | 0.00 | D | C |
| ATOM 16799 | C   | TYR A 445 | -32.784 | 11.819 | -8.588  | 1.00 | 0.00 | D | C |
| ATOM 16800 | O   | TYR A 445 | -32.940 | 11.401 | -7.441  | 1.00 | 0.00 | D | O |
| ATOM 16801 | N   | MET A 446 | -31.584 | 11.844 | -9.188  | 1.00 | 0.00 | D | N |
| ATOM 16802 | CA  | MET A 446 | -30.413 | 11.297 | -8.568  | 1.00 | 0.00 | D | C |
| ATOM 16803 | CB  | MET A 446 | -29.206 | 11.316 | -9.514  | 1.00 | 0.00 | D | C |
| ATOM 16804 | CG  | MET A 446 | -29.501 | 10.595 | -10.828 | 1.00 | 0.00 | D | C |
| ATOM 16805 | SD  | MET A 446 | -30.315 | 8.988  | -10.610 | 1.00 | 0.00 | D | S |
| ATOM 16806 | CE  | MET A 446 | -29.138 | 8.350  | -9.387  | 1.00 | 0.00 | D | C |
| ATOM 16807 | C   | MET A 446 | -30.047 | 12.057 | -7.332  | 1.00 | 0.00 | D | C |
| ATOM 16808 | O   | MET A 446 | -29.688 | 11.463 | -6.317  | 1.00 | 0.00 | D | O |
| ATOM 16809 | N   | ILE A 447 | -30.130 | 13.398 | -7.378  | 1.00 | 0.00 | D | N |
| ATOM 16810 | CA  | ILE A 447 | -29.720 | 14.195 | -6.264  | 1.00 | 0.00 | D | C |
| ATOM 16811 | CB  | ILE A 447 | -29.749 | 15.664 | -6.572  | 1.00 | 0.00 | D | C |
| ATOM 16812 | CG2 | ILE A 447 | -28.754 | 15.913 | -7.718  | 1.00 | 0.00 | D | C |
| ATOM 16813 | CG1 | ILE A 447 | -31.177 | 16.110 | -6.893  | 1.00 | 0.00 | D | C |
| ATOM 16814 | CD  | ILE A 447 | -31.322 | 17.589 | -7.226  | 1.00 | 0.00 | D | C |

ATOM 16815 C ILE A 447 -30.612 13.892 -5.099 1.00 0.00 D C  
ATOM 16816 O ILE A 447 -30.151 13.805 -3.961 1.00 0.00 D O  
ATOM 16817 N ILE A 448 -31.918 13.726 -5.355 1.00 0.00 D N  
ATOM 16818 CA ILE A 448 -32.862 13.453 -4.311 1.00 0.00 D C  
ATOM 16819 CB ILE A 448 -34.273 13.414 -4.804 1.00 0.00 D C  
ATOM 16820 CG2 ILE A 448 -35.181 13.006 -3.633 1.00 0.00 D C  
ATOM 16821 CG1 ILE A 448 -34.644 14.766 -5.421 1.00 0.00 D C  
ATOM 16822 CD ILE A 448 -35.935 14.696 -6.223 1.00 0.00 D C  
ATOM 16823 C ILE A 448 -32.602 12.110 -3.692 1.00 0.00 D C  
ATOM 16824 O ILE A 448 -32.650 11.968 -2.472 1.00 0.00 D O  
ATOM 16825 N PHE A 449 -32.322 11.084 -4.517 1.00 0.00 D N  
ATOM 16826 CA PHE A 449 -32.166 9.748 -4.003 1.00 0.00 D C  
ATOM 16827 CB PHE A 449 -31.856 8.726 -5.115 1.00 0.00 D C  
ATOM 16828 CG PHE A 449 -31.939 7.339 -4.562 1.00 0.00 D C  
ATOM 16829 CD1 PHE A 449 -30.917 6.811 -3.808 1.00 0.00 D C  
ATOM 16830 CE1 PHE A 449 -30.998 5.530 -3.312 1.00 0.00 D C  
ATOM 16831 CZ PHE A 449 -32.106 4.759 -3.566 1.00 0.00 D C  
ATOM 16832 CD2 PHE A 449 -33.044 6.556 -4.816 1.00 0.00 D C  
ATOM 16833 CE2 PHE A 449 -33.131 5.275 -4.323 1.00 0.00 D C  
ATOM 16834 C PHE A 449 -31.015 9.737 -3.046 1.00 0.00 D C  
ATOM 16835 O PHE A 449 -31.097 9.148 -1.968 1.00 0.00 D O  
ATOM 16836 N THR A 450 -29.896 10.371 -3.439 1.00 0.00 D N  
ATOM 16837 CA THR A 450 -28.716 10.429 -2.628 1.00 0.00 D C  
ATOM 16838 CB THR A 450 -27.531 10.975 -3.373 1.00 0.00 D C  
ATOM 16839 OG1 THR A 450 -26.348 10.812 -2.601 1.00 0.00 D O  
ATOM 16840 CG2 THR A 450 -27.771 12.462 -3.683 1.00 0.00 D C  
ATOM 16841 C THR A 450 -28.943 11.287 -1.423 1.00 0.00 D C  
ATOM 16842 O THR A 450 -28.485 10.957 -0.336 1.00 0.00 D O  
ATOM 16843 N MET A 451 -29.658 12.419 -1.575 1.00 0.00 D N  
ATOM 16844 CA MET A 451 -29.816 13.317 -0.466 1.00 0.00 D C  
ATOM 16845 CB MET A 451 -30.583 14.602 -0.817 1.00 0.00 D C  
ATOM 16846 CG MET A 451 -29.770 15.579 -1.665 1.00 0.00 D C  
ATOM 16847 SD MET A 451 -30.613 17.149 -2.016 1.00 0.00 D S  
ATOM 16848 CE MET A 451 -29.141 17.957 -2.706 1.00 0.00 D C  
ATOM 16849 C MET A 451 -30.552 12.656 0.654 1.00 0.00 D C  
ATOM 16850 O MET A 451 -30.151 12.758 1.811 1.00 0.00 D O  
ATOM 16851 N ALA A 452 -31.654 11.951 0.346 1.00 0.00 D N  
ATOM 16852 CA ALA A 452 -32.398 11.333 1.401 1.00 0.00 D C



|      |       |     |           |         |        |       |      |      |   |   |
|------|-------|-----|-----------|---------|--------|-------|------|------|---|---|
| ATOM | 16853 | CB  | ALA A 452 | -33.656 | 10.606 | 0.901 | 1.00 | 0.00 | D | C |
| ATOM | 16854 | C   | ALA A 452 | -31.520 | 10.309 | 2.038 | 1.00 | 0.00 | D | C |
| ATOM | 16855 | O   | ALA A 452 | -31.468 | 10.193 | 3.260 | 1.00 | 0.00 | D | O |
| ATOM | 16856 | N   | ALA A 453 | -30.786 | 9.545  | 1.210 | 1.00 | 0.00 | D | N |
| ATOM | 16857 | CA  | ALA A 453 | -29.948 | 8.490  | 1.702 | 1.00 | 0.00 | D | C |
| ATOM | 16858 | CB  | ALA A 453 | -29.261 | 7.707  | 0.569 | 1.00 | 0.00 | D | C |
| ATOM | 16859 | C   | ALA A 453 | -28.873 | 9.061  | 2.575 | 1.00 | 0.00 | D | C |
| ATOM | 16860 | O   | ALA A 453 | -28.581 | 8.526  | 3.642 | 1.00 | 0.00 | D | O |
| ATOM | 16861 | N   | TYR A 454 | -28.258 | 10.177 | 2.140 | 1.00 | 0.00 | D | N |
| ATOM | 16862 | CA  | TYR A 454 | -27.189 | 10.796 | 2.872 | 1.00 | 0.00 | D | C |
| ATOM | 16863 | CB  | TYR A 454 | -26.614 | 12.019 | 2.135 | 1.00 | 0.00 | D | C |
| ATOM | 16864 | CG  | TYR A 454 | -25.707 | 12.736 | 3.076 | 1.00 | 0.00 | D | C |
| ATOM | 16865 | CD1 | TYR A 454 | -24.393 | 12.356 | 3.222 | 1.00 | 0.00 | D | C |
| ATOM | 16866 | CE1 | TYR A 454 | -23.566 | 13.025 | 4.095 | 1.00 | 0.00 | D | C |
| ATOM | 16867 | CZ  | TYR A 454 | -24.050 | 14.082 | 4.827 | 1.00 | 0.00 | D | C |
| ATOM | 16868 | OH  | TYR A 454 | -23.197 | 14.764 | 5.720 | 1.00 | 0.00 | D | O |
| ATOM | 16869 | CD2 | TYR A 454 | -26.183 | 13.794 | 3.816 | 1.00 | 0.00 | D | C |
| ATOM | 16870 | CE2 | TYR A 454 | -25.363 | 14.466 | 4.689 | 1.00 | 0.00 | D | C |
| ATOM | 16871 | C   | TYR A 454 | -27.713 | 11.288 | 4.190 | 1.00 | 0.00 | D | C |
| ATOM | 16872 | O   | TYR A 454 | -27.107 | 11.072 | 5.237 | 1.00 | 0.00 | D | O |
| ATOM | 16873 | N   | TYR A 455 | -28.863 | 11.978 | 4.141 | 1.00 | 0.00 | D | N |
| ATOM | 16874 | CA  | TYR A 455 | -29.549 | 12.595 | 5.241 | 1.00 | 0.00 | D | C |
| ATOM | 16875 | CB  | TYR A 455 | -30.594 | 13.647 | 4.829 | 1.00 | 0.00 | D | C |
| ATOM | 16876 | CG  | TYR A 455 | -29.855 | 14.849 | 4.354 | 1.00 | 0.00 | D | C |
| ATOM | 16877 | CD1 | TYR A 455 | -29.160 | 15.632 | 5.249 | 1.00 | 0.00 | D | C |
| ATOM | 16878 | CE1 | TYR A 455 | -28.479 | 16.747 | 4.826 | 1.00 | 0.00 | D | C |
| ATOM | 16879 | CZ  | TYR A 455 | -28.494 | 17.097 | 3.497 | 1.00 | 0.00 | D | C |
| ATOM | 16880 | OH  | TYR A 455 | -27.797 | 18.241 | 3.056 | 1.00 | 0.00 | D | O |
| ATOM | 16881 | CD2 | TYR A 455 | -29.874 | 15.211 | 3.029 | 1.00 | 0.00 | D | C |
| ATOM | 16882 | CE2 | TYR A 455 | -29.196 | 16.326 | 2.599 | 1.00 | 0.00 | D | C |
| ATOM | 16883 | C   | TYR A 455 | -30.234 | 11.630 | 6.163 | 1.00 | 0.00 | D | C |
| ATOM | 16884 | O   | TYR A 455 | -30.553 | 12.015 | 7.285 | 1.00 | 0.00 | D | O |
| ATOM | 16885 | N   | ARG A 456 | -30.565 | 10.404 | 5.704 | 1.00 | 0.00 | D | N |
| ATOM | 16886 | CA  | ARG A 456 | -31.386 | 9.473  | 6.443 | 1.00 | 0.00 | D | C |
| ATOM | 16887 | CB  | ARG A 456 | -31.345 | 8.027  | 5.916 | 1.00 | 0.00 | D | C |
| ATOM | 16888 | CG  | ARG A 456 | -29.946 | 7.410  | 5.986 | 1.00 | 0.00 | D | C |
| ATOM | 16889 | CD  | ARG A 456 | -29.910 | 5.889  | 5.827 | 1.00 | 0.00 | D | C |
| ATOM | 16890 | NE  | ARG A 456 | -30.267 | 5.273  | 7.134 | 1.00 | 0.00 | D | N |

ATOM 16891 CZ ARG A 456 -30.946 4.087 7.168 1.00 0.00 D C  
ATOM 16892 NH1 ARG A 456 -31.347 3.508 6.001 1.00 0.00 D N  
ATOM 16893 NH2 ARG A 456 -31.222 3.487 8.362 1.00 0.00 D N  
ATOM 16894 C ARG A 456 -30.981 9.379 7.882 1.00 0.00 D C  
ATOM 16895 O ARG A 456 -29.802 9.368 8.234 1.00 0.00 D O  
ATOM 16896 N PRO A 457 -31.997 9.358 8.719 1.00 0.00 D N  
ATOM 16897 CD PRO A 457 -33.200 10.117 8.421 1.00 0.00 D C  
ATOM 16898 CA PRO A 457 -31.790 9.226 10.138 1.00 0.00 D C  
ATOM 16899 CB PRO A 457 -33.083 9.691 10.805 1.00 0.00 D C  
ATOM 16900 CG PRO A 457 -33.706 10.643 9.774 1.00 0.00 D C  
ATOM 16901 C PRO A 457 -31.414 7.830 10.520 1.00 0.00 D C  
ATOM 16902 O PRO A 457 -32.041 6.888 10.033 1.00 0.00 D O  
ATOM 16903 N VAL A 458 -30.419 7.686 11.416 1.00 0.00 D N  
ATOM 16904 CA VAL A 458 -29.952 6.407 11.874 1.00 0.00 D C  
ATOM 16905 CB VAL A 458 -28.720 6.524 12.720 1.00 0.00 D C  
ATOM 16906 CG1 VAL A 458 -28.372 5.137 13.286 1.00 0.00 D C  
ATOM 16907 CG2 VAL A 458 -27.608 7.146 11.858 1.00 0.00 D C  
ATOM 16908 C VAL A 458 -31.013 5.754 12.694 1.00 0.00 D C  
ATOM 16909 O VAL A 458 -31.293 4.569 12.502 1.00 0.00 D O  
ATOM 16910 N ASP A 459 -31.634 6.559 13.586 1.00 0.00 D N  
ATOM 16911 CA ASP A 459 -32.640 6.217 14.551 1.00 0.00 D C  
ATOM 16912 CB ASP A 459 -34.065 6.572 14.096 1.00 0.00 D C  
ATOM 16913 CG ASP A 459 -34.182 8.089 14.086 1.00 0.00 D C  
ATOM 16914 OD1 ASP A 459 -33.726 8.723 15.073 1.00 0.00 D O  
ATOM 16915 OD2 ASP A 459 -34.736 8.631 13.091 1.00 0.00 D O  
ATOM 16916 C ASP A 459 -32.601 4.777 14.870 1.00 0.00 D C  
ATOM 16917 O ASP A 459 -31.581 4.229 15.295 1.00 0.00 D O  
ATOM 16918 N GLY A 460 -33.788 4.182 14.710 1.00 0.00 D N  
ATOM 16919 CA GLY A 460 -34.053 2.797 14.811 1.00 0.00 D C  
ATOM 16920 C GLY A 460 -34.185 2.397 13.385 1.00 0.00 D C  
ATOM 16921 O GLY A 460 -33.318 2.712 12.569 1.00 0.00 D O  
ATOM 16922 N LEU A 461 -35.281 1.699 13.046 1.00 0.00 D N  
ATOM 16923 CA LEU A 461 -35.507 1.248 11.705 1.00 0.00 D C  
ATOM 16924 CB LEU A 461 -35.919 -0.225 11.682 1.00 0.00 D C  
ATOM 16925 CG LEU A 461 -34.830 -1.179 12.219 1.00 0.00 D C  
ATOM 16926 CD1 LEU A 461 -34.537 -0.940 13.709 1.00 0.00 D C  
ATOM 16927 CD2 LEU A 461 -35.183 -2.645 11.941 1.00 0.00 D C  
ATOM 16928 C LEU A 461 -36.609 2.094 11.146 1.00 0.00 D C

|      |       |     |           |         |        |        |      |      |   |   |
|------|-------|-----|-----------|---------|--------|--------|------|------|---|---|
| ATOM | 16929 | O   | LEU A 461 | -37.474 | 2.519  | 11.899 | 1.00 | 0.00 | D | O |
| ATOM | 16930 | N   | PRO A 462 | -36.706 | 2.230  | 9.854  | 1.00 | 0.00 | D | N |
| ATOM | 16931 | CD  | PRO A 462 | -36.644 | 1.039  | 9.022  | 1.00 | 0.00 | D | C |
| ATOM | 16932 | CA  | PRO A 462 | -37.466 | 3.287  | 9.220  | 1.00 | 0.00 | D | C |
| ATOM | 16933 | CB  | PRO A 462 | -37.731 | 2.809  | 7.795  | 1.00 | 0.00 | D | C |
| ATOM | 16934 | CG  | PRO A 462 | -37.662 | 1.278  | 7.898  | 1.00 | 0.00 | D | C |
| ATOM | 16935 | C   | PRO A 462 | -38.676 | 3.906  | 9.875  | 1.00 | 0.00 | D | C |
| ATOM | 16936 | O   | PRO A 462 | -38.488 | 5.077  | 10.218 | 1.00 | 0.00 | D | O |
| ATOM | 16937 | N   | PRO A 463 | -39.845 | 3.365  | 10.108 | 1.00 | 0.00 | D | N |
| ATOM | 16938 | CD  | PRO A 463 | -40.459 | 2.400  | 9.212  | 1.00 | 0.00 | D | C |
| ATOM | 16939 | CA  | PRO A 463 | -40.834 | 4.145  | 10.813 | 1.00 | 0.00 | D | C |
| ATOM | 16940 | CB  | PRO A 463 | -42.199 | 3.631  | 10.355 | 1.00 | 0.00 | D | C |
| ATOM | 16941 | CG  | PRO A 463 | -41.897 | 2.257  | 9.735  | 1.00 | 0.00 | D | C |
| ATOM | 16942 | C   | PRO A 463 | -40.587 | 3.939  | 12.263 | 1.00 | 0.00 | D | C |
| ATOM | 16943 | O   | PRO A 463 | -39.944 | 2.947  | 12.601 | 1.00 | 0.00 | D | O |
| ATOM | 16944 | N   | PHE A 464 | -41.097 | 4.829  | 13.136 | 1.00 | 0.00 | D | N |
| ATOM | 16945 | CA  | PHE A 464 | -41.863 | 5.951  | 12.695 | 1.00 | 0.00 | D | C |
| ATOM | 16946 | CB  | PHE A 464 | -42.975 | 6.379  | 13.669 | 1.00 | 0.00 | D | C |
| ATOM | 16947 | CG  | PHE A 464 | -44.070 | 5.380  | 13.509 | 1.00 | 0.00 | D | C |
| ATOM | 16948 | CD1 | PHE A 464 | -44.045 | 4.181  | 14.185 | 1.00 | 0.00 | D | C |
| ATOM | 16949 | CE1 | PHE A 464 | -45.059 | 3.266  | 14.023 | 1.00 | 0.00 | D | C |
| ATOM | 16950 | CZ  | PHE A 464 | -46.109 | 3.539  | 13.180 | 1.00 | 0.00 | D | C |
| ATOM | 16951 | CD2 | PHE A 464 | -45.124 | 5.643  | 12.663 | 1.00 | 0.00 | D | C |
| ATOM | 16952 | CE2 | PHE A 464 | -46.140 | 4.730  | 12.499 | 1.00 | 0.00 | D | C |
| ATOM | 16953 | C   | PHE A 464 | -40.958 | 7.110  | 12.434 | 1.00 | 0.00 | D | C |
| ATOM | 16954 | O   | PHE A 464 | -39.831 | 7.166  | 12.921 | 1.00 | 0.00 | D | O |
| ATOM | 16955 | N   | LYS A 465 | -41.443 | 8.050  | 11.598 | 1.00 | 0.00 | D | N |
| ATOM | 16956 | CA  | LYS A 465 | -40.701 | 9.227  | 11.252 | 1.00 | 0.00 | D | C |
| ATOM | 16957 | CB  | LYS A 465 | -40.663 | 9.488  | 9.737  | 1.00 | 0.00 | D | C |
| ATOM | 16958 | CG  | LYS A 465 | -40.000 | 8.370  | 8.931  | 1.00 | 0.00 | D | C |
| ATOM | 16959 | CD  | LYS A 465 | -40.277 | 8.461  | 7.429  | 1.00 | 0.00 | D | C |
| ATOM | 16960 | CE  | LYS A 465 | -41.741 | 8.217  | 7.060  | 1.00 | 0.00 | D | C |
| ATOM | 16961 | NZ  | LYS A 465 | -42.096 | 6.799  | 7.296  | 1.00 | 0.00 | D | N |
| ATOM | 16962 | C   | LYS A 465 | -41.422 | 10.401 | 11.857 | 1.00 | 0.00 | D | C |
| ATOM | 16963 | O   | LYS A 465 | -42.650 | 10.443 | 11.865 | 1.00 | 0.00 | D | O |
| ATOM | 16964 | N   | MET A 466 | -40.660 | 11.380 | 12.394 | 1.00 | 0.00 | D | N |
| ATOM | 16965 | CA  | MET A 466 | -41.203 | 12.548 | 13.037 | 1.00 | 0.00 | D | C |
| ATOM | 16966 | CB  | MET A 466 | -40.111 | 13.439 | 13.659 | 1.00 | 0.00 | D | C |

|      |       |     |           |         |        |        |      |      |   |   |
|------|-------|-----|-----------|---------|--------|--------|------|------|---|---|
| ATOM | 16967 | CG  | MET A 466 | -39.214 | 12.742 | 14.690 | 1.00 | 0.00 | D | C |
| ATOM | 16968 | SD  | MET A 466 | -37.969 | 13.843 | 15.437 | 1.00 | 0.00 | D | S |
| ATOM | 16969 | CE  | MET A 466 | -36.775 | 12.570 | 15.944 | 1.00 | 0.00 | D | C |
| ATOM | 16970 | C   | MET A 466 | -41.923 | 13.405 | 12.037 | 1.00 | 0.00 | D | C |
| ATOM | 16971 | O   | MET A 466 | -43.026 | 13.883 | 12.298 | 1.00 | 0.00 | D | O |
| ATOM | 16972 | N   | GLU A 467 | -41.324 | 13.603 | 10.848 | 1.00 | 0.00 | D | N |
| ATOM | 16973 | CA  | GLU A 467 | -41.923 | 14.451 | 9.857  | 1.00 | 0.00 | D | C |
| ATOM | 16974 | CB  | GLU A 467 | -43.343 | 14.012 | 9.475  | 1.00 | 0.00 | D | C |
| ATOM | 16975 | CG  | GLU A 467 | -43.408 | 12.675 | 8.745  | 1.00 | 0.00 | D | C |
| ATOM | 16976 | CD  | GLU A 467 | -44.879 | 12.420 | 8.456  | 1.00 | 0.00 | D | C |
| ATOM | 16977 | OE1 | GLU A 467 | -45.672 | 13.389 | 8.598  | 1.00 | 0.00 | D | O |
| ATOM | 16978 | OE2 | GLU A 467 | -45.231 | 11.267 | 8.089  | 1.00 | 0.00 | D | O |
| ATOM | 16979 | C   | GLU A 467 | -42.044 | 15.846 | 10.403 | 1.00 | 0.00 | D | C |
| ATOM | 16980 | O   | GLU A 467 | -42.999 | 16.557 | 10.088 | 1.00 | 0.00 | D | O |
| ATOM | 16981 | N   | LYS A 468 | -41.070 | 16.294 | 11.221 | 1.00 | 0.00 | D | N |
| ATOM | 16982 | CA  | LYS A 468 | -41.091 | 17.629 | 11.756 | 1.00 | 0.00 | D | C |
| ATOM | 16983 | CB  | LYS A 468 | -40.587 | 17.732 | 13.206 | 1.00 | 0.00 | D | C |
| ATOM | 16984 | CG  | LYS A 468 | -41.610 | 17.199 | 14.214 | 1.00 | 0.00 | D | C |
| ATOM | 16985 | CD  | LYS A 468 | -42.953 | 17.931 | 14.128 | 1.00 | 0.00 | D | C |
| ATOM | 16986 | CE  | LYS A 468 | -44.032 | 17.395 | 15.073 | 1.00 | 0.00 | D | C |
| ATOM | 16987 | NZ  | LYS A 468 | -45.291 | 18.157 | 14.885 | 1.00 | 0.00 | D | N |
| ATOM | 16988 | C   | LYS A 468 | -40.227 | 18.491 | 10.883 | 1.00 | 0.00 | D | C |
| ATOM | 16989 | O   | LYS A 468 | -39.937 | 18.130 | 9.749  | 1.00 | 0.00 | D | O |
| ATOM | 16990 | N   | THR A 469 | -39.810 | 19.674 | 11.374 | 1.00 | 0.00 | D | N |
| ATOM | 16991 | CA  | THR A 469 | -39.029 | 20.549 | 10.543 | 1.00 | 0.00 | D | C |
| ATOM | 16992 | CB  | THR A 469 | -38.625 | 21.820 | 11.226 | 1.00 | 0.00 | D | C |
| ATOM | 16993 | OG1 | THR A 469 | -37.999 | 22.699 | 10.302 | 1.00 | 0.00 | D | O |
| ATOM | 16994 | CG2 | THR A 469 | -37.662 | 21.478 | 12.377 | 1.00 | 0.00 | D | C |
| ATOM | 16995 | C   | THR A 469 | -37.783 | 19.829 | 10.142 | 1.00 | 0.00 | D | C |
| ATOM | 16996 | O   | THR A 469 | -37.239 | 19.020 | 10.889 | 1.00 | 0.00 | D | O |
| ATOM | 16997 | N   | GLY A 470 | -37.344 | 20.022 | 8.881  | 1.00 | 0.00 | D | N |
| ATOM | 16998 | CA  | GLY A 470 | -36.143 | 19.397 | 8.399  | 1.00 | 0.00 | D | C |
| ATOM | 16999 | C   | GLY A 470 | -36.529 | 18.024 | 7.971  | 1.00 | 0.00 | D | C |
| ATOM | 17000 | O   | GLY A 470 | -35.983 | 17.466 | 7.020  | 1.00 | 0.00 | D | O |
| ATOM | 17001 | N   | ASP A 471 | -37.484 | 17.445 | 8.718  | 1.00 | 0.00 | D | N |
| ATOM | 17002 | CA  | ASP A 471 | -38.069 | 16.179 | 8.459  | 1.00 | 0.00 | D | C |
| ATOM | 17003 | CB  | ASP A 471 | -38.859 | 15.594 | 9.632  | 1.00 | 0.00 | D | C |
| ATOM | 17004 | CG  | ASP A 471 | -37.854 | 15.174 | 10.695 | 1.00 | 0.00 | D | C |

ATOM 17005 OD1 ASP A 471 -36.628 15.225 10.404 1.00 0.00 D O  
ATOM 17006 OD2 ASP A 471 -38.301 14.793 11.810 1.00 0.00 D O  
ATOM 17007 C ASP A 471 -38.975 16.342 7.295 1.00 0.00 D C  
ATOM 17008 O ASP A 471 -39.300 15.378 6.615 1.00 0.00 D O  
ATOM 17009 N TYR A 472 -39.466 17.572 7.072 1.00 0.00 D N  
ATOM 17010 CA TYR A 472 -40.369 17.782 5.982 1.00 0.00 D C  
ATOM 17011 CB TYR A 472 -40.953 19.207 5.987 1.00 0.00 D C  
ATOM 17012 CG TYR A 472 -42.006 19.312 4.937 1.00 0.00 D C  
ATOM 17013 CD1 TYR A 472 -43.234 18.713 5.116 1.00 0.00 D C  
ATOM 17014 CE1 TYR A 472 -44.215 18.812 4.156 1.00 0.00 D C  
ATOM 17015 CZ TYR A 472 -43.976 19.519 3.002 1.00 0.00 D C  
ATOM 17016 OH TYR A 472 -44.978 19.625 2.014 1.00 0.00 D O  
ATOM 17017 CD2 TYR A 472 -41.783 20.026 3.784 1.00 0.00 D C  
ATOM 17018 CE2 TYR A 472 -42.759 20.128 2.819 1.00 0.00 D C  
ATOM 17019 C TYR A 472 -39.646 17.551 4.686 1.00 0.00 D C  
ATOM 17020 O TYR A 472 -40.145 16.844 3.813 1.00 0.00 D O  
ATOM 17021 N PHE A 473 -38.434 18.123 4.535 1.00 0.00 D N  
ATOM 17022 CA PHE A 473 -37.706 18.019 3.299 1.00 0.00 D C  
ATOM 17023 CB PHE A 473 -36.405 18.840 3.254 1.00 0.00 D C  
ATOM 17024 CG PHE A 473 -36.749 20.273 3.072 1.00 0.00 D C  
ATOM 17025 CD1 PHE A 473 -37.119 20.737 1.832 1.00 0.00 D C  
ATOM 17026 CE1 PHE A 473 -37.433 22.063 1.643 1.00 0.00 D C  
ATOM 17027 CZ PHE A 473 -37.374 22.935 2.702 1.00 0.00 D C  
ATOM 17028 CD2 PHE A 473 -36.684 21.156 4.127 1.00 0.00 D C  
ATOM 17029 CE2 PHE A 473 -36.997 22.482 3.943 1.00 0.00 D C  
ATOM 17030 C PHE A 473 -37.301 16.607 3.006 1.00 0.00 D C  
ATOM 17031 O PHE A 473 -37.464 16.136 1.881 1.00 0.00 D O  
ATOM 17032 N ARG A 474 -36.749 15.894 4.003 1.00 0.00 D N  
ATOM 17033 CA ARG A 474 -36.241 14.578 3.748 1.00 0.00 D C  
ATOM 17034 CB ARG A 474 -35.500 13.966 4.947 1.00 0.00 D C  
ATOM 17035 CG ARG A 474 -36.373 13.732 6.177 1.00 0.00 D C  
ATOM 17036 CD ARG A 474 -35.579 13.170 7.356 1.00 0.00 D C  
ATOM 17037 NE ARG A 474 -36.556 12.662 8.358 1.00 0.00 D N  
ATOM 17038 CZ ARG A 474 -36.965 11.362 8.294 1.00 0.00 D C  
ATOM 17039 NH1 ARG A 474 -36.449 10.532 7.342 1.00 0.00 D N  
ATOM 17040 NH2 ARG A 474 -37.889 10.894 9.182 1.00 0.00 D N  
ATOM 17041 C ARG A 474 -37.355 13.646 3.374 1.00 0.00 D C  
ATOM 17042 O ARG A 474 -37.198 12.815 2.480 1.00 0.00 D O

|      |       |     |           |         |        |        |      |      |   |   |
|------|-------|-----|-----------|---------|--------|--------|------|------|---|---|
| ATOM | 17043 | N   | VAL A 475 | -38.514 | 13.767 | 4.043  | 1.00 | 0.00 | D | N |
| ATOM | 17044 | CA  | VAL A 475 | -39.624 | 12.889 | 3.794  | 1.00 | 0.00 | D | C |
| ATOM | 17045 | CB  | VAL A 475 | -40.804 | 13.156 | 4.680  | 1.00 | 0.00 | D | C |
| ATOM | 17046 | CG1 | VAL A 475 | -41.961 | 12.252 | 4.222  | 1.00 | 0.00 | D | C |
| ATOM | 17047 | CG2 | VAL A 475 | -40.391 | 12.907 | 6.140  | 1.00 | 0.00 | D | C |
| ATOM | 17048 | C   | VAL A 475 | -40.079 | 13.038 | 2.378  | 1.00 | 0.00 | D | C |
| ATOM | 17049 | O   | VAL A 475 | -40.430 | 12.057 | 1.726  | 1.00 | 0.00 | D | O |
| ATOM | 17050 | N   | THR A 476 | -40.102 | 14.278 | 1.860  | 1.00 | 0.00 | D | N |
| ATOM | 17051 | CA  | THR A 476 | -40.565 | 14.467 | 0.517  | 1.00 | 0.00 | D | C |
| ATOM | 17052 | CB  | THR A 476 | -40.609 | 15.912 | 0.106  | 1.00 | 0.00 | D | C |
| ATOM | 17053 | OG1 | THR A 476 | -39.303 | 16.468 | 0.103  | 1.00 | 0.00 | D | O |
| ATOM | 17054 | CG2 | THR A 476 | -41.507 | 16.675 | 1.094  | 1.00 | 0.00 | D | C |
| ATOM | 17055 | C   | THR A 476 | -39.627 | 13.749 | -0.401 | 1.00 | 0.00 | D | C |
| ATOM | 17056 | O   | THR A 476 | -40.052 | 13.109 | -1.363 | 1.00 | 0.00 | D | O |
| ATOM | 17057 | N   | GLY A 477 | -38.317 | 13.830 | -0.112 | 1.00 | 0.00 | D | N |
| ATOM | 17058 | CA  | GLY A 477 | -37.334 | 13.229 | -0.966 | 1.00 | 0.00 | D | C |
| ATOM | 17059 | C   | GLY A 477 | -37.513 | 11.744 | -1.014 | 1.00 | 0.00 | D | C |
| ATOM | 17060 | O   | GLY A 477 | -37.370 | 11.135 | -2.072 | 1.00 | 0.00 | D | O |
| ATOM | 17061 | N   | GLU A 478 | -37.812 | 11.113 | 0.137  | 1.00 | 0.00 | D | N |
| ATOM | 17062 | CA  | GLU A 478 | -37.927 | 9.683  | 0.173  | 1.00 | 0.00 | D | C |
| ATOM | 17063 | CB  | GLU A 478 | -38.181 | 9.125  | 1.587  | 1.00 | 0.00 | D | C |
| ATOM | 17064 | CG  | GLU A 478 | -39.550 | 9.495  | 2.158  | 1.00 | 0.00 | D | C |
| ATOM | 17065 | CD  | GLU A 478 | -39.660 | 8.931  | 3.566  | 1.00 | 0.00 | D | C |
| ATOM | 17066 | OE1 | GLU A 478 | -38.597 | 8.619  | 4.166  | 1.00 | 0.00 | D | O |
| ATOM | 17067 | OE2 | GLU A 478 | -40.812 | 8.809  | 4.063  | 1.00 | 0.00 | D | O |
| ATOM | 17068 | C   | GLU A 478 | -39.072 | 9.258  | -0.687 | 1.00 | 0.00 | D | C |
| ATOM | 17069 | O   | GLU A 478 | -38.964 | 8.289  | -1.440 | 1.00 | 0.00 | D | O |
| ATOM | 17070 | N   | ILE A 479 | -40.209 | 9.969  | -0.596 | 1.00 | 0.00 | D | N |
| ATOM | 17071 | CA  | ILE A 479 | -41.353 | 9.611  | -1.382 | 1.00 | 0.00 | D | C |
| ATOM | 17072 | CB  | ILE A 479 | -42.577 | 10.423 | -1.073 | 1.00 | 0.00 | D | C |
| ATOM | 17073 | CG2 | ILE A 479 | -43.643 | 10.092 | -2.133 | 1.00 | 0.00 | D | C |
| ATOM | 17074 | CG1 | ILE A 479 | -43.043 | 10.170 | 0.371  | 1.00 | 0.00 | D | C |
| ATOM | 17075 | CD  | ILE A 479 | -44.139 | 11.126 | 0.837  | 1.00 | 0.00 | D | C |
| ATOM | 17076 | C   | ILE A 479 | -41.026 | 9.808  | -2.828 | 1.00 | 0.00 | D | C |
| ATOM | 17077 | O   | ILE A 479 | -41.358 | 8.972  | -3.667 | 1.00 | 0.00 | D | O |
| ATOM | 17078 | N   | LEU A 480 | -40.350 | 10.925 | -3.150 | 1.00 | 0.00 | D | N |
| ATOM | 17079 | CA  | LEU A 480 | -40.050 | 11.265 | -4.510 | 1.00 | 0.00 | D | C |
| ATOM | 17080 | CB  | LEU A 480 | -39.345 | 12.625 | -4.634 | 1.00 | 0.00 | D | C |

|      |       |     |     |   |     |         |        |         |      |      |   |   |
|------|-------|-----|-----|---|-----|---------|--------|---------|------|------|---|---|
| ATOM | 17081 | CG  | LEU | A | 480 | -40.200 | 13.794 | -4.109  | 1.00 | 0.00 | D | C |
| ATOM | 17082 | CD1 | LEU | A | 480 | -39.516 | 15.147 | -4.355  | 1.00 | 0.00 | D | C |
| ATOM | 17083 | CD2 | LEU | A | 480 | -41.632 | 13.726 | -4.666  | 1.00 | 0.00 | D | C |
| ATOM | 17084 | C   | LEU | A | 480 | -39.152 | 10.228 | -5.116  | 1.00 | 0.00 | D | C |
| ATOM | 17085 | O   | LEU | A | 480 | -39.341 | 9.834  | -6.264  | 1.00 | 0.00 | D | O |
| ATOM | 17086 | N   | SER | A | 481 | -38.149 | 9.751  | -4.356  | 1.00 | 0.00 | D | N |
| ATOM | 17087 | CA  | SER | A | 481 | -37.219 | 8.803  | -4.899  | 1.00 | 0.00 | D | C |
| ATOM | 17088 | CB  | SER | A | 481 | -36.099 | 8.434  | -3.911  | 1.00 | 0.00 | D | C |
| ATOM | 17089 | OG  | SER | A | 481 | -36.640 | 7.770  | -2.779  | 1.00 | 0.00 | D | O |
| ATOM | 17090 | C   | SER | A | 481 | -37.937 | 7.538  | -5.262  | 1.00 | 0.00 | D | C |
| ATOM | 17091 | O   | SER | A | 481 | -37.687 | 6.953  | -6.315  | 1.00 | 0.00 | D | O |
| ATOM | 17092 | N   | VAL | A | 482 | -38.856 | 7.075  | -4.397  | 1.00 | 0.00 | D | N |
| ATOM | 17093 | CA  | VAL | A | 482 | -39.555 | 5.853  | -4.666  | 1.00 | 0.00 | D | C |
| ATOM | 17094 | CB  | VAL | A | 482 | -40.499 | 5.467  | -3.568  | 1.00 | 0.00 | D | C |
| ATOM | 17095 | CG1 | VAL | A | 482 | -41.198 | 4.153  | -3.957  | 1.00 | 0.00 | D | C |
| ATOM | 17096 | CG2 | VAL | A | 482 | -39.716 | 5.408  | -2.244  | 1.00 | 0.00 | D | C |
| ATOM | 17097 | C   | VAL | A | 482 | -40.369 | 6.036  | -5.906  | 1.00 | 0.00 | D | C |
| ATOM | 17098 | O   | VAL | A | 482 | -40.412 | 5.164  | -6.774  | 1.00 | 0.00 | D | O |
| ATOM | 17099 | N   | LEU | A | 483 | -41.026 | 7.208  | -6.024  | 1.00 | 0.00 | D | N |
| ATOM | 17100 | CA  | LEU | A | 483 | -41.886 | 7.504  | -7.134  | 1.00 | 0.00 | D | C |
| ATOM | 17101 | CB  | LEU | A | 483 | -42.516 | 8.907  | -7.010  | 1.00 | 0.00 | D | C |
| ATOM | 17102 | CG  | LEU | A | 483 | -43.622 | 9.270  | -8.034  | 1.00 | 0.00 | D | C |
| ATOM | 17103 | CD1 | LEU | A | 483 | -44.144 | 10.692 | -7.778  | 1.00 | 0.00 | D | C |
| ATOM | 17104 | CD2 | LEU | A | 483 | -43.185 | 9.097  | -9.497  | 1.00 | 0.00 | D | C |
| ATOM | 17105 | C   | LEU | A | 483 | -41.029 | 7.466  | -8.355  | 1.00 | 0.00 | D | C |
| ATOM | 17106 | O   | LEU | A | 483 | -41.440 | 6.970  | -9.402  | 1.00 | 0.00 | D | O |
| ATOM | 17107 | N   | GLY | A | 484 | -39.801 | 8.000  | -8.247  | 1.00 | 0.00 | D | N |
| ATOM | 17108 | CA  | GLY | A | 484 | -38.916 | 8.015  | -9.368  | 1.00 | 0.00 | D | C |
| ATOM | 17109 | C   | GLY | A | 484 | -38.636 | 6.596  | -9.746  | 1.00 | 0.00 | D | C |
| ATOM | 17110 | O   | GLY | A | 484 | -38.483 | 6.268  | -10.922 | 1.00 | 0.00 | D | O |
| ATOM | 17111 | N   | GLY | A | 485 | -38.539 | 5.719  | -8.734  | 1.00 | 0.00 | D | N |
| ATOM | 17112 | CA  | GLY | A | 485 | -38.217 | 4.338  | -8.950  | 1.00 | 0.00 | D | C |
| ATOM | 17113 | C   | GLY | A | 485 | -39.273 | 3.652  | -9.766  | 1.00 | 0.00 | D | C |
| ATOM | 17114 | O   | GLY | A | 485 | -38.956 | 2.821  | -10.614 | 1.00 | 0.00 | D | O |
| ATOM | 17115 | N   | VAL | A | 486 | -40.560 | 3.967  | -9.527  | 1.00 | 0.00 | D | N |
| ATOM | 17116 | CA  | VAL | A | 486 | -41.632 | 3.266  | -10.183 | 1.00 | 0.00 | D | C |
| ATOM | 17117 | CB  | VAL | A | 486 | -42.990 | 3.680  | -9.703  | 1.00 | 0.00 | D | C |
| ATOM | 17118 | CG1 | VAL | A | 486 | -43.282 | 5.102  | -10.208 | 1.00 | 0.00 | D | C |

ATOM 17119 CG2 VAL A 486 -44.013 2.630 -10.166 1.00 0.00 D C  
ATOM 17120 C VAL A 486 -41.591 3.483 -11.665 1.00 0.00 D C  
ATOM 17121 O VAL A 486 -41.879 2.572 -12.441 1.00 0.00 D O  
ATOM 17122 N TYR A 487 -41.221 4.696 -12.108 1.00 0.00 D N  
ATOM 17123 CA TYR A 487 -41.282 4.993 -13.510 1.00 0.00 D C  
ATOM 17124 CB TYR A 487 -40.878 6.436 -13.842 1.00 0.00 D C  
ATOM 17125 CG TYR A 487 -41.063 6.569 -15.311 1.00 0.00 D C  
ATOM 17126 CD1 TYR A 487 -42.322 6.788 -15.815 1.00 0.00 D C  
ATOM 17127 CE1 TYR A 487 -42.526 6.906 -17.166 1.00 0.00 D C  
ATOM 17128 CZ TYR A 487 -41.465 6.798 -18.028 1.00 0.00 D C  
ATOM 17129 OH TYR A 487 -41.673 6.921 -19.418 1.00 0.00 D O  
ATOM 17130 CD2 TYR A 487 -40.003 6.446 -16.180 1.00 0.00 D C  
ATOM 17131 CE2 TYR A 487 -40.203 6.566 -17.535 1.00 0.00 D C  
ATOM 17132 C TYR A 487 -40.374 4.071 -14.262 1.00 0.00 D C  
ATOM 17133 O TYR A 487 -40.731 3.571 -15.326 1.00 0.00 D O  
ATOM 17134 N PHE A 488 -39.173 3.818 -13.718 1.00 0.00 D N  
ATOM 17135 CA PHE A 488 -38.218 2.969 -14.366 1.00 0.00 D C  
ATOM 17136 CB PHE A 488 -36.911 2.821 -13.558 1.00 0.00 D C  
ATOM 17137 CG PHE A 488 -36.177 4.122 -13.520 1.00 0.00 D C  
ATOM 17138 CD1 PHE A 488 -35.403 4.518 -14.587 1.00 0.00 D C  
ATOM 17139 CE1 PHE A 488 -34.717 5.710 -14.556 1.00 0.00 D C  
ATOM 17140 CZ PHE A 488 -34.791 6.521 -13.450 1.00 0.00 D C  
ATOM 17141 CD2 PHE A 488 -36.234 4.938 -12.410 1.00 0.00 D C  
ATOM 17142 CE2 PHE A 488 -35.550 6.132 -12.373 1.00 0.00 D C  
ATOM 17143 C PHE A 488 -38.805 1.595 -14.499 1.00 0.00 D C  
ATOM 17144 O PHE A 488 -38.671 0.956 -15.543 1.00 0.00 D O  
ATOM 17145 N PHE A 489 -39.469 1.093 -13.437 1.00 0.00 D N  
ATOM 17146 CA PHE A 489 -40.010 -0.235 -13.483 1.00 0.00 D C  
ATOM 17147 CB PHE A 489 -40.653 -0.693 -12.161 1.00 0.00 D C  
ATOM 17148 CG PHE A 489 -41.133 -2.088 -12.385 1.00 0.00 D C  
ATOM 17149 CD1 PHE A 489 -40.298 -3.155 -12.143 1.00 0.00 D C  
ATOM 17150 CE1 PHE A 489 -40.727 -4.447 -12.349 1.00 0.00 D C  
ATOM 17151 CZ PHE A 489 -42.001 -4.682 -12.805 1.00 0.00 D C  
ATOM 17152 CD2 PHE A 489 -42.406 -2.334 -12.848 1.00 0.00 D C  
ATOM 17153 CE2 PHE A 489 -42.839 -3.623 -13.055 1.00 0.00 D C  
ATOM 17154 C PHE A 489 -41.070 -0.303 -14.538 1.00 0.00 D C  
ATOM 17155 O PHE A 489 -41.129 -1.261 -15.306 1.00 0.00 D O  
ATOM 17156 N PHE A 490 -41.949 0.716 -14.599 1.00 0.00 D N



|      |       |     |           |         |        |         |      |      |   |   |
|------|-------|-----|-----------|---------|--------|---------|------|------|---|---|
| ATOM | 17157 | CA  | PHE A 490 | -43.021 | 0.714  | -15.556 | 1.00 | 0.00 | D | C |
| ATOM | 17158 | CB  | PHE A 490 | -43.981 | 1.905  | -15.377 | 1.00 | 0.00 | D | C |
| ATOM | 17159 | CG  | PHE A 490 | -45.024 | 1.863  | -16.442 | 1.00 | 0.00 | D | C |
| ATOM | 17160 | CD1 | PHE A 490 | -46.027 | 0.920  | -16.422 | 1.00 | 0.00 | D | C |
| ATOM | 17161 | CE1 | PHE A 490 | -46.986 | 0.897  | -17.408 | 1.00 | 0.00 | D | C |
| ATOM | 17162 | CZ  | PHE A 490 | -46.956 | 1.825  | -18.422 | 1.00 | 0.00 | D | C |
| ATOM | 17163 | CD2 | PHE A 490 | -45.008 | 2.792  | -17.457 | 1.00 | 0.00 | D | C |
| ATOM | 17164 | CE2 | PHE A 490 | -45.966 | 2.775  | -18.445 | 1.00 | 0.00 | D | C |
| ATOM | 17165 | C   | PHE A 490 | -42.462 | 0.759  | -16.945 | 1.00 | 0.00 | D | C |
| ATOM | 17166 | O   | PHE A 490 | -42.907 | 0.019  | -17.819 | 1.00 | 0.00 | D | O |
| ATOM | 17167 | N   | ARG A 491 | -41.467 | 1.630  | -17.189 | 1.00 | 0.00 | D | N |
| ATOM | 17168 | CA  | ARG A 491 | -40.918 | 1.757  | -18.510 | 1.00 | 0.00 | D | C |
| ATOM | 17169 | CB  | ARG A 491 | -39.908 | 2.916  | -18.631 | 1.00 | 0.00 | D | C |
| ATOM | 17170 | CG  | ARG A 491 | -38.714 | 2.811  | -17.681 | 1.00 | 0.00 | D | C |
| ATOM | 17171 | CD  | ARG A 491 | -37.857 | 4.081  | -17.638 | 1.00 | 0.00 | D | C |
| ATOM | 17172 | NE  | ARG A 491 | -37.032 | 4.120  | -18.877 | 1.00 | 0.00 | D | N |
| ATOM | 17173 | CZ  | ARG A 491 | -35.718 | 3.751  | -18.827 | 1.00 | 0.00 | D | C |
| ATOM | 17174 | NH1 | ARG A 491 | -35.151 | 3.415  | -17.632 | 1.00 | 0.00 | D | N |
| ATOM | 17175 | NH2 | ARG A 491 | -34.969 | 3.730  | -19.969 | 1.00 | 0.00 | D | N |
| ATOM | 17176 | C   | ARG A 491 | -40.242 | 0.481  | -18.913 | 1.00 | 0.00 | D | C |
| ATOM | 17177 | O   | ARG A 491 | -40.347 | 0.055  | -20.061 | 1.00 | 0.00 | D | O |
| ATOM | 17178 | N   | GLY A 492 | -39.525 | -0.166 | -17.974 | 1.00 | 0.00 | D | N |
| ATOM | 17179 | CA  | GLY A 492 | -38.780 | -1.361 | -18.265 | 1.00 | 0.00 | D | C |
| ATOM | 17180 | C   | GLY A 492 | -39.681 | -2.487 | -18.673 | 1.00 | 0.00 | D | C |
| ATOM | 17181 | O   | GLY A 492 | -39.352 | -3.258 | -19.575 | 1.00 | 0.00 | D | O |
| ATOM | 17182 | N   | ILE A 493 | -40.847 | -2.617 | -18.014 | 1.00 | 0.00 | D | N |
| ATOM | 17183 | CA  | ILE A 493 | -41.718 | -3.725 | -18.279 | 1.00 | 0.00 | D | C |
| ATOM | 17184 | CB  | ILE A 493 | -42.942 | -3.746 | -17.405 | 1.00 | 0.00 | D | C |
| ATOM | 17185 | CG2 | ILE A 493 | -43.844 | -2.559 | -17.777 | 1.00 | 0.00 | D | C |
| ATOM | 17186 | CG1 | ILE A 493 | -43.637 | -5.116 | -17.502 | 1.00 | 0.00 | D | C |
| ATOM | 17187 | CD  | ILE A 493 | -44.684 | -5.341 | -16.413 | 1.00 | 0.00 | D | C |
| ATOM | 17188 | C   | ILE A 493 | -42.145 | -3.670 | -19.705 | 1.00 | 0.00 | D | C |
| ATOM | 17189 | O   | ILE A 493 | -42.231 | -4.701 | -20.367 | 1.00 | 0.00 | D | O |
| ATOM | 17190 | N   | GLN A 494 | -42.423 | -2.461 | -20.216 | 1.00 | 0.00 | D | N |
| ATOM | 17191 | CA  | GLN A 494 | -42.854 | -2.292 | -21.572 | 1.00 | 0.00 | D | C |
| ATOM | 17192 | CB  | GLN A 494 | -43.108 | -0.822 | -21.936 | 1.00 | 0.00 | D | C |
| ATOM | 17193 | CG  | GLN A 494 | -43.569 | -0.627 | -23.382 | 1.00 | 0.00 | D | C |
| ATOM | 17194 | CD  | GLN A 494 | -43.609 | 0.868  | -23.656 | 1.00 | 0.00 | D | C |

ATOM 17195 OE1 GLN A 494 -44.446 1.358 -24.412 1.00 0.00 D O  
ATOM 17196 NE2 GLN A 494 -42.663 1.618 -23.027 1.00 0.00 D N  
ATOM 17197 C GLN A 494 -41.767 -2.755 -22.480 1.00 0.00 D C  
ATOM 17198 O GLN A 494 -42.035 -3.335 -23.524 1.00 0.00 D O  
ATOM 17199 N TYR A 495 -40.500 -2.495 -22.131 1.00 0.00 D N  
ATOM 17200 CA TYR A 495 -39.436 -2.882 -23.012 1.00 0.00 D C  
ATOM 17201 CB TYR A 495 -38.063 -2.417 -22.502 1.00 0.00 D C  
ATOM 17202 CG TYR A 495 -37.069 -2.595 -23.597 1.00 0.00 D C  
ATOM 17203 CD1 TYR A 495 -36.398 -3.783 -23.770 1.00 0.00 D C  
ATOM 17204 CE1 TYR A 495 -35.483 -3.920 -24.787 1.00 0.00 D C  
ATOM 17205 CZ TYR A 495 -35.232 -2.872 -25.641 1.00 0.00 D C  
ATOM 17206 OH TYR A 495 -34.291 -3.012 -26.682 1.00 0.00 D O  
ATOM 17207 CD2 TYR A 495 -36.817 -1.555 -24.459 1.00 0.00 D C  
ATOM 17208 CE2 TYR A 495 -35.903 -1.685 -25.477 1.00 0.00 D C  
ATOM 17209 C TYR A 495 -39.438 -4.375 -23.105 1.00 0.00 D C  
ATOM 17210 O TYR A 495 -39.281 -4.944 -24.184 1.00 0.00 D O  
ATOM 17211 N PHE A 496 -39.604 -5.049 -21.954 1.00 0.00 D N  
ATOM 17212 CA PHE A 496 -39.635 -6.479 -21.910 1.00 0.00 D C  
ATOM 17213 CB PHE A 496 -39.727 -6.991 -20.458 1.00 0.00 D C  
ATOM 17214 CG PHE A 496 -39.612 -8.477 -20.420 1.00 0.00 D C  
ATOM 17215 CD1 PHE A 496 -38.389 -9.083 -20.586 1.00 0.00 D C  
ATOM 17216 CE1 PHE A 496 -38.269 -10.451 -20.542 1.00 0.00 D C  
ATOM 17217 CZ PHE A 496 -39.379 -11.231 -20.323 1.00 0.00 D C  
ATOM 17218 CD2 PHE A 496 -40.717 -9.266 -20.191 1.00 0.00 D C  
ATOM 17219 CE2 PHE A 496 -40.605 -10.637 -20.145 1.00 0.00 D C  
ATOM 17220 C PHE A 496 -40.844 -6.957 -22.651 1.00 0.00 D C  
ATOM 17221 O PHE A 496 -40.763 -7.880 -23.460 1.00 0.00 D O  
ATOM 17222 N LEU A 497 -42.005 -6.323 -22.392 1.00 0.00 D N  
ATOM 17223 CA LEU A 497 -43.256 -6.746 -22.951 1.00 0.00 D C  
ATOM 17224 CB LEU A 497 -44.463 -6.038 -22.300 1.00 0.00 D C  
ATOM 17225 CG LEU A 497 -45.851 -6.633 -22.639 1.00 0.00 D C  
ATOM 17226 CD1 LEU A 497 -46.935 -5.975 -21.775 1.00 0.00 D C  
ATOM 17227 CD2 LEU A 497 -46.203 -6.548 -24.134 1.00 0.00 D C  
ATOM 17228 C LEU A 497 -43.288 -6.533 -24.433 1.00 0.00 D C  
ATOM 17229 O LEU A 497 -43.759 -7.389 -25.178 1.00 0.00 D O  
ATOM 17230 N GLN A 498 -42.785 -5.387 -24.909 1.00 0.00 D N  
ATOM 17231 CA GLN A 498 -42.840 -5.047 -26.297 1.00 0.00 D C  
ATOM 17232 CB GLN A 498 -42.172 -3.690 -26.543 1.00 0.00 D C

|      |       |     |           |         |         |         |      |      |   |   |
|------|-------|-----|-----------|---------|---------|---------|------|------|---|---|
| ATOM | 17233 | CG  | GLN A 498 | -42.176 | -3.210  | -27.988 | 1.00 | 0.00 | D | C |
| ATOM | 17234 | CD  | GLN A 498 | -41.470 | -1.866  | -27.958 | 1.00 | 0.00 | D | C |
| ATOM | 17235 | OE1 | GLN A 498 | -40.380 | -1.746  | -27.399 | 1.00 | 0.00 | D | O |
| ATOM | 17236 | NE2 | GLN A 498 | -42.113 | -0.823  | -28.545 | 1.00 | 0.00 | D | N |
| ATOM | 17237 | C   | GLN A 498 | -42.078 | -6.087  | -27.046 | 1.00 | 0.00 | D | C |
| ATOM | 17238 | O   | GLN A 498 | -42.554 | -6.605  | -28.055 | 1.00 | 0.00 | D | O |
| ATOM | 17239 | N   | ARG A 499 | -40.870 | -6.428  | -26.561 | 1.00 | 0.00 | D | N |
| ATOM | 17240 | CA  | ARG A 499 | -40.134 | -7.457  | -27.226 | 1.00 | 0.00 | D | C |
| ATOM | 17241 | CB  | ARG A 499 | -38.776 | -7.001  | -27.780 | 1.00 | 0.00 | D | C |
| ATOM | 17242 | CG  | ARG A 499 | -38.927 | -6.075  | -28.986 | 1.00 | 0.00 | D | C |
| ATOM | 17243 | CD  | ARG A 499 | -39.543 | -6.790  | -30.188 | 1.00 | 0.00 | D | C |
| ATOM | 17244 | NE  | ARG A 499 | -39.619 | -5.812  | -31.307 | 1.00 | 0.00 | D | N |
| ATOM | 17245 | CZ  | ARG A 499 | -39.265 | -6.204  | -32.562 | 1.00 | 0.00 | D | C |
| ATOM | 17246 | NH1 | ARG A 499 | -38.864 | -7.490  | -32.787 | 1.00 | 0.00 | D | N |
| ATOM | 17247 | NH2 | ARG A 499 | -39.282 | -5.306  | -33.591 | 1.00 | 0.00 | D | N |
| ATOM | 17248 | C   | ARG A 499 | -39.881 | -8.541  | -26.237 | 1.00 | 0.00 | D | C |
| ATOM | 17249 | O   | ARG A 499 | -38.987 | -8.455  | -25.395 | 1.00 | 0.00 | D | O |
| ATOM | 17250 | N   | ARG A 500 | -40.680 | -9.607  | -26.360 | 1.00 | 0.00 | D | N |
| ATOM | 17251 | CA  | ARG A 500 | -40.651 | -10.774 | -25.534 | 1.00 | 0.00 | D | C |
| ATOM | 17252 | CB  | ARG A 500 | -41.751 | -11.764 | -25.946 | 1.00 | 0.00 | D | C |
| ATOM | 17253 | CG  | ARG A 500 | -43.153 | -11.167 | -25.859 | 1.00 | 0.00 | D | C |
| ATOM | 17254 | CD  | ARG A 500 | -44.194 | -11.950 | -26.658 | 1.00 | 0.00 | D | C |
| ATOM | 17255 | NE  | ARG A 500 | -43.863 | -11.788 | -28.103 | 1.00 | 0.00 | D | N |
| ATOM | 17256 | CZ  | ARG A 500 | -44.362 | -12.667 | -29.021 | 1.00 | 0.00 | D | C |
| ATOM | 17257 | NH1 | ARG A 500 | -45.125 | -13.721 | -28.609 | 1.00 | 0.00 | D | N |
| ATOM | 17258 | NH2 | ARG A 500 | -44.097 | -12.493 | -30.348 | 1.00 | 0.00 | D | N |
| ATOM | 17259 | C   | ARG A 500 | -39.346 | -11.489 | -25.711 | 1.00 | 0.00 | D | C |
| ATOM | 17260 | O   | ARG A 500 | -38.785 | -11.981 | -24.730 | 1.00 | 0.00 | D | O |
| ATOM | 17261 | N   | PRO A 501 | -38.817 | -11.566 | -26.908 | 1.00 | 0.00 | D | N |
| ATOM | 17262 | CD  | PRO A 501 | -39.631 | -11.656 | -28.110 | 1.00 | 0.00 | D | C |
| ATOM | 17263 | CA  | PRO A 501 | -37.601 | -12.306 | -27.082 | 1.00 | 0.00 | D | C |
| ATOM | 17264 | CB  | PRO A 501 | -37.381 | -12.421 | -28.594 | 1.00 | 0.00 | D | C |
| ATOM | 17265 | CG  | PRO A 501 | -38.580 | -11.686 | -29.229 | 1.00 | 0.00 | D | C |
| ATOM | 17266 | C   | PRO A 501 | -36.467 | -11.734 | -26.302 | 1.00 | 0.00 | D | C |
| ATOM | 17267 | O   | PRO A 501 | -36.386 | -10.519 | -26.136 | 1.00 | 0.00 | D | O |
| ATOM | 17268 | N   | SER A 502 | -35.572 | -12.615 | -25.822 | 1.00 | 0.00 | D | N |
| ATOM | 17269 | CA  | SER A 502 | -34.504 | -12.252 | -24.944 | 1.00 | 0.00 | D | C |
| ATOM | 17270 | CB  | SER A 502 | -33.978 | -13.472 | -24.158 | 1.00 | 0.00 | D | C |

|            |     |           |         |         |         |      |      |   |   |
|------------|-----|-----------|---------|---------|---------|------|------|---|---|
| ATOM 17271 | OG  | SER A 502 | -33.022 | -13.102 | -23.176 | 1.00 | 0.00 | D | O |
| ATOM 17272 | C   | SER A 502 | -33.384 | -11.662 | -25.728 | 1.00 | 0.00 | D | C |
| ATOM 17273 | O   | SER A 502 | -33.500 | -11.407 | -26.923 | 1.00 | 0.00 | D | O |
| ATOM 17274 | N   | MET A 503 | -32.292 | -11.345 | -25.016 | 1.00 | 0.00 | D | N |
| ATOM 17275 | CA  | MET A 503 | -31.080 | -10.893 | -25.613 | 1.00 | 0.00 | D | C |
| ATOM 17276 | CB  | MET A 503 | -30.660 | -9.500  | -25.114 | 1.00 | 0.00 | D | C |
| ATOM 17277 | CG  | MET A 503 | -30.648 | -9.370  | -23.592 | 1.00 | 0.00 | D | C |
| ATOM 17278 | SD  | MET A 503 | -30.751 | -7.655  | -23.000 | 1.00 | 0.00 | D | S |
| ATOM 17279 | CE  | MET A 503 | -32.456 | -7.420  | -23.584 | 1.00 | 0.00 | D | C |
| ATOM 17280 | C   | MET A 503 | -30.079 | -11.924 | -25.212 | 1.00 | 0.00 | D | C |
| ATOM 17281 | O   | MET A 503 | -30.062 | -12.370 | -24.065 | 1.00 | 0.00 | D | O |
| ATOM 17282 | N   | LYS A 504 | -29.231 | -12.345 | -26.166 | 1.00 | 0.00 | D | N |
| ATOM 17283 | CA  | LYS A 504 | -28.308 | -13.406 | -25.916 | 1.00 | 0.00 | D | C |
| ATOM 17284 | CB  | LYS A 504 | -27.642 | -13.976 | -27.182 | 1.00 | 0.00 | D | C |
| ATOM 17285 | CG  | LYS A 504 | -26.918 | -15.300 | -26.932 | 1.00 | 0.00 | D | C |
| ATOM 17286 | CD  | LYS A 504 | -26.596 | -16.080 | -28.208 | 1.00 | 0.00 | D | C |
| ATOM 17287 | CE  | LYS A 504 | -26.059 | -17.489 | -27.944 | 1.00 | 0.00 | D | C |
| ATOM 17288 | NZ  | LYS A 504 | -24.702 | -17.415 | -27.357 | 1.00 | 0.00 | D | N |
| ATOM 17289 | C   | LYS A 504 | -27.246 | -12.918 | -24.999 | 1.00 | 0.00 | D | C |
| ATOM 17290 | O   | LYS A 504 | -27.082 | -11.716 | -24.785 | 1.00 | 0.00 | D | O |
| ATOM 17291 | N   | THR A 505 | -26.519 | -13.871 | -24.397 | 1.00 | 0.00 | D | N |
| ATOM 17292 | CA  | THR A 505 | -25.483 | -13.554 | -23.469 | 1.00 | 0.00 | D | C |
| ATOM 17293 | CB  | THR A 505 | -24.831 | -14.775 | -22.896 | 1.00 | 0.00 | D | C |
| ATOM 17294 | OG1 | THR A 505 | -24.171 | -15.503 | -23.921 | 1.00 | 0.00 | D | O |
| ATOM 17295 | CG2 | THR A 505 | -25.919 | -15.643 | -22.243 | 1.00 | 0.00 | D | C |
| ATOM 17296 | C   | THR A 505 | -24.423 | -12.798 | -24.190 | 1.00 | 0.00 | D | C |
| ATOM 17297 | O   | THR A 505 | -23.873 | -11.837 | -23.658 | 1.00 | 0.00 | D | O |
| ATOM 17298 | N   | LEU A 506 | -24.119 | -13.200 | -25.439 | 1.00 | 0.00 | D | N |
| ATOM 17299 | CA  | LEU A 506 | -23.050 | -12.544 | -26.130 | 1.00 | 0.00 | D | C |
| ATOM 17300 | CB  | LEU A 506 | -22.815 | -13.064 | -27.559 | 1.00 | 0.00 | D | C |
| ATOM 17301 | CG  | LEU A 506 | -22.240 | -14.488 | -27.632 | 1.00 | 0.00 | D | C |
| ATOM 17302 | CD1 | LEU A 506 | -21.990 | -14.905 | -29.092 | 1.00 | 0.00 | D | C |
| ATOM 17303 | CD2 | LEU A 506 | -20.988 | -14.627 | -26.757 | 1.00 | 0.00 | D | C |
| ATOM 17304 | C   | LEU A 506 | -23.382 | -11.099 | -26.255 | 1.00 | 0.00 | D | C |
| ATOM 17305 | O   | LEU A 506 | -22.543 | -10.243 | -25.980 | 1.00 | 0.00 | D | O |
| ATOM 17306 | N   | PHE A 507 | -24.622 | -10.773 | -26.656 | 1.00 | 0.00 | D | N |
| ATOM 17307 | CA  | PHE A 507 | -24.892 | -9.375  | -26.781 | 1.00 | 0.00 | D | C |
| ATOM 17308 | CB  | PHE A 507 | -25.589 | -8.976  | -28.094 | 1.00 | 0.00 | D | C |

|      |       |     |           |         |         |         |      |      |   |   |
|------|-------|-----|-----------|---------|---------|---------|------|------|---|---|
| ATOM | 17309 | CG  | PHE A 507 | -26.907 | -9.663  | -28.257 | 1.00 | 0.00 | D | C |
| ATOM | 17310 | CD1 | PHE A 507 | -26.966 | -10.957 | -28.722 | 1.00 | 0.00 | D | C |
| ATOM | 17311 | CE1 | PHE A 507 | -28.178 | -11.587 | -28.890 | 1.00 | 0.00 | D | C |
| ATOM | 17312 | CZ  | PHE A 507 | -29.344 | -10.919 | -28.598 | 1.00 | 0.00 | D | C |
| ATOM | 17313 | CD2 | PHE A 507 | -28.083 | -9.001  | -27.976 | 1.00 | 0.00 | D | C |
| ATOM | 17314 | CE2 | PHE A 507 | -29.296 | -9.623  | -28.141 | 1.00 | 0.00 | D | C |
| ATOM | 17315 | C   | PHE A 507 | -25.731 | -8.925  | -25.640 | 1.00 | 0.00 | D | C |
| ATOM | 17316 | O   | PHE A 507 | -26.899 | -9.288  | -25.513 | 1.00 | 0.00 | D | O |
| ATOM | 17317 | N   | VAL A 508 | -25.130 | -8.097  | -24.771 | 1.00 | 0.00 | D | N |
| ATOM | 17318 | CA  | VAL A 508 | -25.852 | -7.548  | -23.682 | 1.00 | 0.00 | D | C |
| ATOM | 17319 | CB  | VAL A 508 | -24.949 | -7.121  | -22.563 | 1.00 | 0.00 | D | C |
| ATOM | 17320 | CG1 | VAL A 508 | -25.807 | -6.530  | -21.437 | 1.00 | 0.00 | D | C |
| ATOM | 17321 | CG2 | VAL A 508 | -24.087 | -8.321  | -22.133 | 1.00 | 0.00 | D | C |
| ATOM | 17322 | C   | VAL A 508 | -26.465 | -6.321  | -24.257 | 1.00 | 0.00 | D | C |
| ATOM | 17323 | O   | VAL A 508 | -26.226 | -5.205  | -23.802 | 1.00 | 0.00 | D | O |
| ATOM | 17324 | N   | ASP A 509 | -27.300 | -6.523  | -25.287 | 1.00 | 0.00 | D | N |
| ATOM | 17325 | CA  | ASP A 509 | -27.924 | -5.420  | -25.941 | 1.00 | 0.00 | D | C |
| ATOM | 17326 | CB  | ASP A 509 | -27.671 | -5.401  | -27.459 | 1.00 | 0.00 | D | C |
| ATOM | 17327 | CG  | ASP A 509 | -28.288 | -4.144  | -28.055 | 1.00 | 0.00 | D | C |
| ATOM | 17328 | OD1 | ASP A 509 | -29.530 | -3.971  | -27.946 | 1.00 | 0.00 | D | O |
| ATOM | 17329 | OD2 | ASP A 509 | -27.514 | -3.333  | -28.631 | 1.00 | 0.00 | D | O |
| ATOM | 17330 | C   | ASP A 509 | -29.394 | -5.567  | -25.725 | 1.00 | 0.00 | D | C |
| ATOM | 17331 | O   | ASP A 509 | -29.958 | -6.631  | -25.978 | 1.00 | 0.00 | D | O |
| ATOM | 17332 | N   | SER A 510 | -30.051 | -4.489  | -25.257 | 1.00 | 0.00 | D | N |
| ATOM | 17333 | CA  | SER A 510 | -29.356 | -3.261  | -25.004 | 1.00 | 0.00 | D | C |
| ATOM | 17334 | CB  | SER A 510 | -30.259 | -2.013  | -25.095 | 1.00 | 0.00 | D | C |
| ATOM | 17335 | OG  | SER A 510 | -31.277 | -2.060  | -24.109 | 1.00 | 0.00 | D | O |
| ATOM | 17336 | C   | SER A 510 | -28.784 | -3.316  | -23.620 | 1.00 | 0.00 | D | C |
| ATOM | 17337 | O   | SER A 510 | -29.441 | -3.724  | -22.666 | 1.00 | 0.00 | D | O |
| ATOM | 17338 | N   | TYR A 511 | -27.506 | -2.907  | -23.505 | 1.00 | 0.00 | D | N |
| ATOM | 17339 | CA  | TYR A 511 | -26.756 | -2.912  | -22.283 | 1.00 | 0.00 | D | C |
| ATOM | 17340 | CB  | TYR A 511 | -25.310 | -2.445  | -22.552 | 1.00 | 0.00 | D | C |
| ATOM | 17341 | CG  | TYR A 511 | -24.570 | -2.164  | -21.284 | 1.00 | 0.00 | D | C |
| ATOM | 17342 | CD1 | TYR A 511 | -24.623 | -0.923  | -20.691 | 1.00 | 0.00 | D | C |
| ATOM | 17343 | CE1 | TYR A 511 | -23.939 | -0.656  | -19.528 | 1.00 | 0.00 | D | C |
| ATOM | 17344 | CZ  | TYR A 511 | -23.182 | -1.638  | -18.943 | 1.00 | 0.00 | D | C |
| ATOM | 17345 | OH  | TYR A 511 | -22.473 | -1.378  | -17.752 | 1.00 | 0.00 | D | O |
| ATOM | 17346 | CD2 | TYR A 511 | -23.804 | -3.135  | -20.689 | 1.00 | 0.00 | D | C |

|      |       |               |         |        |         |      |      |   |   |
|------|-------|---------------|---------|--------|---------|------|------|---|---|
| ATOM | 17347 | CE2 TYR A 511 | -23.116 | -2.878 | -19.529 | 1.00 | 0.00 | D | C |
| ATOM | 17348 | C TYR A 511   | -27.320 | -1.949 | -21.281 | 1.00 | 0.00 | D | C |
| ATOM | 17349 | O TYR A 511   | -27.529 | -2.299 | -20.121 | 1.00 | 0.00 | D | O |
| ATOM | 17350 | N SER A 512   | -27.572 | -0.700 | -21.712 | 1.00 | 0.00 | D | N |
| ATOM | 17351 | CA SER A 512  | -27.948 | 0.365  | -20.824 | 1.00 | 0.00 | D | C |
| ATOM | 17352 | CB SER A 512  | -27.882 | 1.739  | -21.512 | 1.00 | 0.00 | D | C |
| ATOM | 17353 | OG SER A 512  | -28.777 | 1.775  | -22.616 | 1.00 | 0.00 | D | O |
| ATOM | 17354 | C SER A 512   | -29.319 | 0.207  | -20.253 | 1.00 | 0.00 | D | C |
| ATOM | 17355 | O SER A 512   | -29.522 | 0.373  | -19.050 | 1.00 | 0.00 | D | O |
| ATOM | 17356 | N GLU A 513   | -30.300 | -0.129 | -21.102 | 1.00 | 0.00 | D | N |
| ATOM | 17357 | CA GLU A 513  | -31.656 | -0.195 | -20.652 | 1.00 | 0.00 | D | C |
| ATOM | 17358 | CB GLU A 513  | -32.630 | -0.458 | -21.810 | 1.00 | 0.00 | D | C |
| ATOM | 17359 | CG GLU A 513  | -32.676 | 0.736  | -22.767 | 1.00 | 0.00 | D | C |
| ATOM | 17360 | CD GLU A 513  | -33.525 | 0.361  | -23.966 | 1.00 | 0.00 | D | C |
| ATOM | 17361 | OE1 GLU A 513 | -33.560 | -0.850 | -24.313 | 1.00 | 0.00 | D | O |
| ATOM | 17362 | OE2 GLU A 513 | -34.151 | 1.282  | -24.551 | 1.00 | 0.00 | D | O |
| ATOM | 17363 | C GLU A 513   | -31.768 | -1.270 | -19.619 | 1.00 | 0.00 | D | C |
| ATOM | 17364 | O GLU A 513   | -32.508 | -1.128 | -18.644 | 1.00 | 0.00 | D | O |
| ATOM | 17365 | N MET A 514   | -31.012 | -2.369 | -19.784 | 1.00 | 0.00 | D | N |
| ATOM | 17366 | CA MET A 514  | -31.105 | -3.452 | -18.848 | 1.00 | 0.00 | D | C |
| ATOM | 17367 | CB MET A 514  | -30.236 | -4.675 | -19.196 | 1.00 | 0.00 | D | C |
| ATOM | 17368 | CG MET A 514  | -28.741 | -4.466 | -18.959 | 1.00 | 0.00 | D | C |
| ATOM | 17369 | SD MET A 514  | -27.730 | -5.970 | -19.113 | 1.00 | 0.00 | D | S |
| ATOM | 17370 | CE MET A 514  | -27.897 | -6.490 | -17.382 | 1.00 | 0.00 | D | C |
| ATOM | 17371 | C MET A 514   | -30.678 | -2.980 | -17.494 | 1.00 | 0.00 | D | C |
| ATOM | 17372 | O MET A 514   | -31.250 | -3.393 | -16.488 | 1.00 | 0.00 | D | O |
| ATOM | 17373 | N LEU A 515   | -29.655 | -2.108 | -17.426 | 1.00 | 0.00 | D | N |
| ATOM | 17374 | CA LEU A 515  | -29.145 | -1.644 | -16.163 | 1.00 | 0.00 | D | C |
| ATOM | 17375 | CB LEU A 515  | -27.921 | -0.725 | -16.316 | 1.00 | 0.00 | D | C |
| ATOM | 17376 | CG LEU A 515  | -26.702 | -1.436 | -16.931 | 1.00 | 0.00 | D | C |
| ATOM | 17377 | CD1 LEU A 515 | -25.493 | -0.493 | -17.027 | 1.00 | 0.00 | D | C |
| ATOM | 17378 | CD2 LEU A 515 | -26.387 | -2.744 | -16.192 | 1.00 | 0.00 | D | C |
| ATOM | 17379 | C LEU A 515   | -30.198 | -0.862 | -15.442 | 1.00 | 0.00 | D | C |
| ATOM | 17380 | O LEU A 515   | -30.346 | -0.981 | -14.226 | 1.00 | 0.00 | D | O |
| ATOM | 17381 | N PHE A 516   | -30.975 | -0.048 | -16.180 | 1.00 | 0.00 | D | N |
| ATOM | 17382 | CA PHE A 516  | -31.951 | 0.805  | -15.564 | 1.00 | 0.00 | D | C |
| ATOM | 17383 | CB PHE A 516  | -32.689 | 1.712  | -16.565 | 1.00 | 0.00 | D | C |
| ATOM | 17384 | CG PHE A 516  | -31.724 | 2.753  | -17.026 | 1.00 | 0.00 | D | C |

|      |       |     |     |   |     |         |        |         |      |      |   |   |
|------|-------|-----|-----|---|-----|---------|--------|---------|------|------|---|---|
| ATOM | 17385 | CD1 | PHE | A | 516 | -31.445 | 3.842  | -16.229 | 1.00 | 0.00 | D | C |
| ATOM | 17386 | CE1 | PHE | A | 516 | -30.561 | 4.811  | -16.642 | 1.00 | 0.00 | D | C |
| ATOM | 17387 | CZ  | PHE | A | 516 | -29.943 | 4.705  | -17.862 | 1.00 | 0.00 | D | C |
| ATOM | 17388 | CD2 | PHE | A | 516 | -31.101 | 2.657  | -18.250 | 1.00 | 0.00 | D | C |
| ATOM | 17389 | CE2 | PHE | A | 516 | -30.216 | 3.626  | -18.668 | 1.00 | 0.00 | D | C |
| ATOM | 17390 | C   | PHE | A | 516 | -32.965 | -0.024 | -14.839 | 1.00 | 0.00 | D | C |
| ATOM | 17391 | O   | PHE | A | 516 | -33.386 | 0.328  | -13.736 | 1.00 | 0.00 | D | O |
| ATOM | 17392 | N   | PHE | A | 517 | -33.386 | -1.151 | -15.434 | 1.00 | 0.00 | D | N |
| ATOM | 17393 | CA  | PHE | A | 517 | -34.373 | -1.999 | -14.826 | 1.00 | 0.00 | D | C |
| ATOM | 17394 | CB  | PHE | A | 517 | -34.729 | -3.210 | -15.709 | 1.00 | 0.00 | D | C |
| ATOM | 17395 | CG  | PHE | A | 517 | -35.478 | -4.185 | -14.866 | 1.00 | 0.00 | D | C |
| ATOM | 17396 | CD1 | PHE | A | 517 | -36.795 | -3.972 | -14.543 | 1.00 | 0.00 | D | C |
| ATOM | 17397 | CE1 | PHE | A | 517 | -37.478 | -4.873 | -13.760 | 1.00 | 0.00 | D | C |
| ATOM | 17398 | CZ  | PHE | A | 517 | -36.850 | -5.996 | -13.284 | 1.00 | 0.00 | D | C |
| ATOM | 17399 | CD2 | PHE | A | 517 | -34.849 | -5.307 | -14.372 | 1.00 | 0.00 | D | C |
| ATOM | 17400 | CE2 | PHE | A | 517 | -35.529 | -6.212 | -13.591 | 1.00 | 0.00 | D | C |
| ATOM | 17401 | C   | PHE | A | 517 | -33.867 | -2.518 | -13.518 | 1.00 | 0.00 | D | C |
| ATOM | 17402 | O   | PHE | A | 517 | -34.607 | -2.550 | -12.535 | 1.00 | 0.00 | D | O |
| ATOM | 17403 | N   | LEU | A | 518 | -32.594 | -2.941 | -13.468 | 1.00 | 0.00 | D | N |
| ATOM | 17404 | CA  | LEU | A | 518 | -32.067 | -3.530 | -12.271 | 1.00 | 0.00 | D | C |
| ATOM | 17405 | CB  | LEU | A | 518 | -30.646 | -4.093 | -12.434 | 1.00 | 0.00 | D | C |
| ATOM | 17406 | CG  | LEU | A | 518 | -30.121 | -4.770 | -11.151 | 1.00 | 0.00 | D | C |
| ATOM | 17407 | CD1 | LEU | A | 518 | -30.964 | -6.002 | -10.784 | 1.00 | 0.00 | D | C |
| ATOM | 17408 | CD2 | LEU | A | 518 | -28.621 | -5.094 | -11.258 | 1.00 | 0.00 | D | C |
| ATOM | 17409 | C   | LEU | A | 518 | -32.035 | -2.524 | -11.155 | 1.00 | 0.00 | D | C |
| ATOM | 17410 | O   | LEU | A | 518 | -32.327 | -2.853 | -10.012 | 1.00 | 0.00 | D | O |
| ATOM | 17411 | N   | GLN | A | 519 | -31.664 | -1.264 | -11.421 | 1.00 | 0.00 | D | N |
| ATOM | 17412 | CA  | GLN | A | 519 | -31.582 | -0.318 | -10.341 | 1.00 | 0.00 | D | C |
| ATOM | 17413 | CB  | GLN | A | 519 | -31.095 | 1.069  | -10.787 | 1.00 | 0.00 | D | C |
| ATOM | 17414 | CG  | GLN | A | 519 | -31.041 | 2.072  | -9.633  | 1.00 | 0.00 | D | C |
| ATOM | 17415 | CD  | GLN | A | 519 | -31.000 | 3.467  | -10.231 | 1.00 | 0.00 | D | C |
| ATOM | 17416 | OE1 | GLN | A | 519 | -30.950 | 3.636  | -11.449 | 1.00 | 0.00 | D | O |
| ATOM | 17417 | NE2 | GLN | A | 519 | -31.037 | 4.504  | -9.351  | 1.00 | 0.00 | D | N |
| ATOM | 17418 | C   | GLN | A | 519 | -32.934 | -0.071 | -9.753  | 1.00 | 0.00 | D | C |
| ATOM | 17419 | O   | GLN | A | 519 | -33.096 | -0.041 | -8.534  | 1.00 | 0.00 | D | O |
| ATOM | 17420 | N   | SER | A | 520 | -33.942 | 0.115  | -10.620 | 1.00 | 0.00 | D | N |
| ATOM | 17421 | CA  | SER | A | 520 | -35.251 | 0.477  | -10.165 | 1.00 | 0.00 | D | C |
| ATOM | 17422 | CB  | SER | A | 520 | -36.223 | 0.769  | -11.320 | 1.00 | 0.00 | D | C |

|      |       |     |     |   |     |         |        |         |      |      |   |   |
|------|-------|-----|-----|---|-----|---------|--------|---------|------|------|---|---|
| ATOM | 17423 | OG  | SER | A | 520 | -36.374 | -0.382 | -12.134 | 1.00 | 0.00 | D | O |
| ATOM | 17424 | C   | SER | A | 520 | -35.820 | -0.622 | -9.328  | 1.00 | 0.00 | D | C |
| ATOM | 17425 | O   | SER | A | 520 | -36.479 | -0.354 | -8.325  | 1.00 | 0.00 | D | O |
| ATOM | 17426 | N   | LEU | A | 521 | -35.584 | -1.892 | -9.703  | 1.00 | 0.00 | D | N |
| ATOM | 17427 | CA  | LEU | A | 521 | -36.161 | -2.940 | -8.909  | 1.00 | 0.00 | D | C |
| ATOM | 17428 | CB  | LEU | A | 521 | -36.099 | -4.352 | -9.536  | 1.00 | 0.00 | D | C |
| ATOM | 17429 | CG  | LEU | A | 521 | -35.126 | -5.393 | -8.928  | 1.00 | 0.00 | D | C |
| ATOM | 17430 | CD1 | LEU | A | 521 | -33.668 | -4.960 | -8.967  | 1.00 | 0.00 | D | C |
| ATOM | 17431 | CD2 | LEU | A | 521 | -35.576 | -5.872 | -7.538  | 1.00 | 0.00 | D | C |
| ATOM | 17432 | C   | LEU | A | 521 | -35.487 | -2.931 | -7.569  | 1.00 | 0.00 | D | C |
| ATOM | 17433 | O   | LEU | A | 521 | -36.116 | -3.214 | -6.552  | 1.00 | 0.00 | D | O |
| ATOM | 17434 | N   | PHE | A | 522 | -34.183 | -2.589 | -7.530  | 1.00 | 0.00 | D | N |
| ATOM | 17435 | CA  | PHE | A | 522 | -33.455 | -2.576 | -6.291  | 1.00 | 0.00 | D | C |
| ATOM | 17436 | CB  | PHE | A | 522 | -31.970 | -2.188 | -6.435  | 1.00 | 0.00 | D | C |
| ATOM | 17437 | CG  | PHE | A | 522 | -31.177 | -3.435 | -6.649  | 1.00 | 0.00 | D | C |
| ATOM | 17438 | CD1 | PHE | A | 522 | -31.006 | -3.986 | -7.896  | 1.00 | 0.00 | D | C |
| ATOM | 17439 | CE1 | PHE | A | 522 | -30.268 | -5.141 | -8.052  | 1.00 | 0.00 | D | C |
| ATOM | 17440 | CZ  | PHE | A | 522 | -29.698 | -5.758 | -6.966  | 1.00 | 0.00 | D | C |
| ATOM | 17441 | CD2 | PHE | A | 522 | -30.603 | -4.064 | -5.567  | 1.00 | 0.00 | D | C |
| ATOM | 17442 | CE2 | PHE | A | 522 | -29.868 | -5.215 | -5.716  | 1.00 | 0.00 | D | C |
| ATOM | 17443 | C   | PHE | A | 522 | -34.100 | -1.618 | -5.347  | 1.00 | 0.00 | D | C |
| ATOM | 17444 | O   | PHE | A | 522 | -34.233 | -1.907 | -4.159  | 1.00 | 0.00 | D | O |
| ATOM | 17445 | N   | MET | A | 523 | -34.514 | -0.440 | -5.841  | 1.00 | 0.00 | D | N |
| ATOM | 17446 | CA  | MET | A | 523 | -35.149 | 0.500  | -4.970  | 1.00 | 0.00 | D | C |
| ATOM | 17447 | CB  | MET | A | 523 | -35.499 | 1.832  | -5.647  | 1.00 | 0.00 | D | C |
| ATOM | 17448 | CG  | MET | A | 523 | -35.938 | 2.891  | -4.634  | 1.00 | 0.00 | D | C |
| ATOM | 17449 | SD  | MET | A | 523 | -36.526 | 4.446  | -5.364  | 1.00 | 0.00 | D | S |
| ATOM | 17450 | CE  | MET | A | 523 | -38.039 | 3.714  | -6.047  | 1.00 | 0.00 | D | C |
| ATOM | 17451 | C   | MET | A | 523 | -36.438 | -0.093 | -4.473  | 1.00 | 0.00 | D | C |
| ATOM | 17452 | O   | MET | A | 523 | -36.814 | 0.096  | -3.320  | 1.00 | 0.00 | D | O |
| ATOM | 17453 | N   | LEU | A | 524 | -37.156 | -0.833 | -5.336  | 1.00 | 0.00 | D | N |
| ATOM | 17454 | CA  | LEU | A | 524 | -38.423 | -1.393 | -4.950  | 1.00 | 0.00 | D | C |
| ATOM | 17455 | CB  | LEU | A | 524 | -39.084 | -2.196 | -6.085  | 1.00 | 0.00 | D | C |
| ATOM | 17456 | CG  | LEU | A | 524 | -39.414 | -1.365 | -7.338  | 1.00 | 0.00 | D | C |
| ATOM | 17457 | CD1 | LEU | A | 524 | -40.076 | -2.236 | -8.420  | 1.00 | 0.00 | D | C |
| ATOM | 17458 | CD2 | LEU | A | 524 | -40.238 | -0.114 | -6.990  | 1.00 | 0.00 | D | C |
| ATOM | 17459 | C   | LEU | A | 524 | -38.197 | -2.346 | -3.823  | 1.00 | 0.00 | D | C |
| ATOM | 17460 | O   | LEU | A | 524 | -38.981 | -2.415 | -2.877  | 1.00 | 0.00 | D | O |



|      |       |     |           |         |        |        |      |      |   |   |
|------|-------|-----|-----------|---------|--------|--------|------|------|---|---|
| ATOM | 17461 | N   | ALA A 525 | -37.104 | -3.123 | -3.894 | 1.00 | 0.00 | D | N |
| ATOM | 17462 | CA  | ALA A 525 | -36.835 | -4.081 | -2.864 | 1.00 | 0.00 | D | C |
| ATOM | 17463 | CB  | ALA A 525 | -35.553 | -4.888 | -3.126 | 1.00 | 0.00 | D | C |
| ATOM | 17464 | C   | ALA A 525 | -36.642 | -3.349 | -1.575 | 1.00 | 0.00 | D | C |
| ATOM | 17465 | O   | ALA A 525 | -37.105 | -3.791 | -0.526 | 1.00 | 0.00 | D | O |
| ATOM | 17466 | N   | THR A 526 | -35.943 | -2.198 | -1.613 | 1.00 | 0.00 | D | N |
| ATOM | 17467 | CA  | THR A 526 | -35.696 | -1.500 | -0.389 | 1.00 | 0.00 | D | C |
| ATOM | 17468 | CB  | THR A 526 | -34.764 | -0.325 | -0.522 | 1.00 | 0.00 | D | C |
| ATOM | 17469 | OG1 | THR A 526 | -35.345 | 0.706  | -1.302 | 1.00 | 0.00 | D | O |
| ATOM | 17470 | CG2 | THR A 526 | -33.460 | -0.814 | -1.181 | 1.00 | 0.00 | D | C |
| ATOM | 17471 | C   | THR A 526 | -36.990 | -1.003 | 0.180  | 1.00 | 0.00 | D | C |
| ATOM | 17472 | O   | THR A 526 | -37.196 | -1.066 | 1.391  | 1.00 | 0.00 | D | O |
| ATOM | 17473 | N   | VAL A 527 | -37.907 | -0.507 | -0.675 | 1.00 | 0.00 | D | N |
| ATOM | 17474 | CA  | VAL A 527 | -39.126 | 0.070  | -0.176 | 1.00 | 0.00 | D | C |
| ATOM | 17475 | CB  | VAL A 527 | -39.997 | 0.709  | -1.226 | 1.00 | 0.00 | D | C |
| ATOM | 17476 | CG1 | VAL A 527 | -39.167 | 1.775  | -1.962 | 1.00 | 0.00 | D | C |
| ATOM | 17477 | CG2 | VAL A 527 | -40.625 | -0.369 | -2.119 | 1.00 | 0.00 | D | C |
| ATOM | 17478 | C   | VAL A 527 | -39.939 | -0.969 | 0.533  | 1.00 | 0.00 | D | C |
| ATOM | 17479 | O   | VAL A 527 | -40.510 | -0.698 | 1.589  | 1.00 | 0.00 | D | O |
| ATOM | 17480 | N   | VAL A 528 | -40.023 | -2.193 | -0.019 | 1.00 | 0.00 | D | N |
| ATOM | 17481 | CA  | VAL A 528 | -40.807 | -3.190 | 0.647  | 1.00 | 0.00 | D | C |
| ATOM | 17482 | CB  | VAL A 528 | -40.874 | -4.500 | -0.090 | 1.00 | 0.00 | D | C |
| ATOM | 17483 | CG1 | VAL A 528 | -41.525 | -4.252 | -1.462 | 1.00 | 0.00 | D | C |
| ATOM | 17484 | CG2 | VAL A 528 | -39.474 | -5.125 | -0.164 | 1.00 | 0.00 | D | C |
| ATOM | 17485 | C   | VAL A 528 | -40.174 | -3.424 | 1.978  | 1.00 | 0.00 | D | C |
| ATOM | 17486 | O   | VAL A 528 | -40.858 | -3.588 | 2.985  | 1.00 | 0.00 | D | O |
| ATOM | 17487 | N   | LEU A 529 | -38.830 | -3.431 | 2.001  | 1.00 | 0.00 | D | N |
| ATOM | 17488 | CA  | LEU A 529 | -38.068 | -3.660 | 3.189  | 1.00 | 0.00 | D | C |
| ATOM | 17489 | CB  | LEU A 529 | -36.556 | -3.761 | 2.925  | 1.00 | 0.00 | D | C |
| ATOM | 17490 | CG  | LEU A 529 | -36.154 | -4.959 | 2.042  | 1.00 | 0.00 | D | C |
| ATOM | 17491 | CD1 | LEU A 529 | -34.631 | -5.023 | 1.843  | 1.00 | 0.00 | D | C |
| ATOM | 17492 | CD2 | LEU A 529 | -36.740 | -6.272 | 2.583  | 1.00 | 0.00 | D | C |
| ATOM | 17493 | C   | LEU A 529 | -38.297 | -2.533 | 4.141  | 1.00 | 0.00 | D | C |
| ATOM | 17494 | O   | LEU A 529 | -38.254 | -2.748 | 5.341  | 1.00 | 0.00 | D | O |
| ATOM | 17495 | N   | TYR A 530 | -38.505 | -1.300 | 3.650  | 1.00 | 0.00 | D | N |
| ATOM | 17496 | CA  | TYR A 530 | -38.714 | -0.126 | 4.461  | 1.00 | 0.00 | D | C |
| ATOM | 17497 | CB  | TYR A 530 | -38.872 | 1.102  | 3.543  | 1.00 | 0.00 | D | C |
| ATOM | 17498 | CG  | TYR A 530 | -38.724 | 2.394  | 4.271  | 1.00 | 0.00 | D | C |

|      |       |               |         |        |        |      |      |   |   |
|------|-------|---------------|---------|--------|--------|------|------|---|---|
| ATOM | 17499 | CD1 TYR A 530 | -37.474 | 2.939  | 4.453  | 1.00 | 0.00 | D | C |
| ATOM | 17500 | CE1 TYR A 530 | -37.313 | 4.138  | 5.108  | 1.00 | 0.00 | D | C |
| ATOM | 17501 | CZ TYR A 530  | -38.413 | 4.805  | 5.584  | 1.00 | 0.00 | D | C |
| ATOM | 17502 | OH TYR A 530  | -38.252 | 6.035  | 6.256  | 1.00 | 0.00 | D | O |
| ATOM | 17503 | CD2 TYR A 530 | -39.822 | 3.076  | 4.743  | 1.00 | 0.00 | D | C |
| ATOM | 17504 | CE2 TYR A 530 | -39.669 | 4.275  | 5.399  | 1.00 | 0.00 | D | C |
| ATOM | 17505 | C TYR A 530   | -39.991 | -0.329 | 5.217  | 1.00 | 0.00 | D | C |
| ATOM | 17506 | O TYR A 530   | -40.087 | -0.028 | 6.407  | 1.00 | 0.00 | D | O |
| ATOM | 17507 | N PHE A 531   | -41.020 | -0.855 | 4.528  | 1.00 | 0.00 | D | N |
| ATOM | 17508 | CA PHE A 531  | -42.269 | -1.121 | 5.173  | 1.00 | 0.00 | D | C |
| ATOM | 17509 | CB PHE A 531  | -43.375 | -1.606 | 4.222  | 1.00 | 0.00 | D | C |
| ATOM | 17510 | CG PHE A 531  | -43.841 | -0.391 | 3.507  | 1.00 | 0.00 | D | C |
| ATOM | 17511 | CD1 PHE A 531 | -44.596 | 0.536  | 4.186  | 1.00 | 0.00 | D | C |
| ATOM | 17512 | CE1 PHE A 531 | -45.045 | 1.671  | 3.555  | 1.00 | 0.00 | D | C |
| ATOM | 17513 | CZ PHE A 531  | -44.743 | 1.881  | 2.233  | 1.00 | 0.00 | D | C |
| ATOM | 17514 | CD2 PHE A 531 | -43.545 | -0.179 | 2.180  | 1.00 | 0.00 | D | C |
| ATOM | 17515 | CE2 PHE A 531 | -43.993 | 0.956  | 1.547  | 1.00 | 0.00 | D | C |
| ATOM | 17516 | C PHE A 531   | -42.046 | -2.168 | 6.210  | 1.00 | 0.00 | D | C |
| ATOM | 17517 | O PHE A 531   | -42.592 | -2.084 | 7.309  | 1.00 | 0.00 | D | O |
| ATOM | 17518 | N SER A 532   | -41.247 | -3.200 | 5.877  | 1.00 | 0.00 | D | N |
| ATOM | 17519 | CA SER A 532  | -40.972 | -4.221 | 6.843  | 1.00 | 0.00 | D | C |
| ATOM | 17520 | CB SER A 532  | -40.287 | -5.477 | 6.262  | 1.00 | 0.00 | D | C |
| ATOM | 17521 | OG SER A 532  | -39.012 | -5.171 | 5.719  | 1.00 | 0.00 | D | O |
| ATOM | 17522 | C SER A 532   | -40.105 | -3.613 | 7.901  | 1.00 | 0.00 | D | C |
| ATOM | 17523 | O SER A 532   | -39.979 | -4.147 | 9.001  | 1.00 | 0.00 | D | O |
| ATOM | 17524 | N HSD A 533   | -39.494 | -2.466 | 7.555  | 1.00 | 0.00 | D | N |
| ATOM | 17525 | CA HSD A 533  | -38.618 | -1.629 | 8.321  | 1.00 | 0.00 | D | C |
| ATOM | 17526 | CB HSD A 533  | -39.316 | -0.901 | 9.487  | 1.00 | 0.00 | D | C |
| ATOM | 17527 | ND1 HSD A 533 | -39.148 | -2.437 | 11.502 | 1.00 | 0.00 | D | N |
| ATOM | 17528 | CG HSD A 533  | -39.892 | -1.822 | 10.519 | 1.00 | 0.00 | D | C |
| ATOM | 17529 | CE1 HSD A 533 | -40.011 | -3.192 | 12.229 | 1.00 | 0.00 | D | C |
| ATOM | 17530 | NE2 HSD A 533 | -41.251 | -3.105 | 11.784 | 1.00 | 0.00 | D | N |
| ATOM | 17531 | CD2 HSD A 533 | -41.174 | -2.241 | 10.704 | 1.00 | 0.00 | D | C |
| ATOM | 17532 | C HSD A 533   | -37.419 | -2.361 | 8.846  | 1.00 | 0.00 | D | C |
| ATOM | 17533 | O HSD A 533   | -36.940 | -2.043 | 9.926  | 1.00 | 0.00 | D | O |
| ATOM | 17534 | N LEU A 534   | -36.860 | -3.336 | 8.103  | 1.00 | 0.00 | D | N |
| ATOM | 17535 | CA LEU A 534  | -35.670 | -3.986 | 8.594  | 1.00 | 0.00 | D | C |
| ATOM | 17536 | CB LEU A 534  | -35.403 | -5.356 | 7.950  | 1.00 | 0.00 | D | C |

|      |       |     |     |   |     |         |        |        |      |      |   |   |
|------|-------|-----|-----|---|-----|---------|--------|--------|------|------|---|---|
| ATOM | 17537 | CG  | LEU | A | 534 | -36.524 | -6.377 | 8.223  | 1.00 | 0.00 | D | C |
| ATOM | 17538 | CD1 | LEU | A | 534 | -36.205 | -7.745 | 7.603  | 1.00 | 0.00 | D | C |
| ATOM | 17539 | CD2 | LEU | A | 534 | -36.853 | -6.459 | 9.722  | 1.00 | 0.00 | D | C |
| ATOM | 17540 | C   | LEU | A | 534 | -34.514 | -3.091 | 8.274  | 1.00 | 0.00 | D | C |
| ATOM | 17541 | O   | LEU | A | 534 | -34.508 | -2.438 | 7.237  | 1.00 | 0.00 | D | O |
| ATOM | 17542 | N   | LYS | A | 535 | -33.496 | -3.053 | 9.153  | 1.00 | 0.00 | D | N |
| ATOM | 17543 | CA  | LYS | A | 535 | -32.348 | -2.194 | 9.020  | 1.00 | 0.00 | D | C |
| ATOM | 17544 | CB  | LYS | A | 535 | -31.403 | -2.296 | 10.224 | 1.00 | 0.00 | D | C |
| ATOM | 17545 | CG  | LYS | A | 535 | -31.989 | -1.714 | 11.512 | 1.00 | 0.00 | D | C |
| ATOM | 17546 | CD  | LYS | A | 535 | -31.239 | -2.130 | 12.778 | 1.00 | 0.00 | D | C |
| ATOM | 17547 | CE  | LYS | A | 535 | -29.733 | -1.870 | 12.718 | 1.00 | 0.00 | D | C |
| ATOM | 17548 | NZ  | LYS | A | 535 | -29.077 | -2.889 | 11.867 | 1.00 | 0.00 | D | N |
| ATOM | 17549 | C   | LYS | A | 535 | -31.562 | -2.556 | 7.795  | 1.00 | 0.00 | D | C |
| ATOM | 17550 | O   | LYS | A | 535 | -31.003 | -1.684 | 7.130  | 1.00 | 0.00 | D | O |
| ATOM | 17551 | N   | GLU | A | 536 | -31.516 | -3.853 | 7.453  | 1.00 | 0.00 | D | N |
| ATOM | 17552 | CA  | GLU | A | 536 | -30.718 | -4.333 | 6.358  | 1.00 | 0.00 | D | C |
| ATOM | 17553 | CB  | GLU | A | 536 | -30.730 | -5.858 | 6.168  | 1.00 | 0.00 | D | C |
| ATOM | 17554 | CG  | GLU | A | 536 | -29.817 | -6.607 | 7.137  | 1.00 | 0.00 | D | C |
| ATOM | 17555 | CD  | GLU | A | 536 | -29.579 | -7.989 | 6.546  | 1.00 | 0.00 | D | C |
| ATOM | 17556 | OE1 | GLU | A | 536 | -30.478 | -8.477 | 5.808  | 1.00 | 0.00 | D | O |
| ATOM | 17557 | OE2 | GLU | A | 536 | -28.495 | -8.571 | 6.816  | 1.00 | 0.00 | D | O |
| ATOM | 17558 | C   | GLU | A | 536 | -31.172 | -3.725 | 5.073  | 1.00 | 0.00 | D | C |
| ATOM | 17559 | O   | GLU | A | 536 | -30.430 | -3.722 | 4.092  | 1.00 | 0.00 | D | O |
| ATOM | 17560 | N   | TYR | A | 537 | -32.406 | -3.197 | 5.035  | 1.00 | 0.00 | D | N |
| ATOM | 17561 | CA  | TYR | A | 537 | -32.979 | -2.720 | 3.809  | 1.00 | 0.00 | D | C |
| ATOM | 17562 | CB  | TYR | A | 537 | -34.374 | -2.083 | 3.980  | 1.00 | 0.00 | D | C |
| ATOM | 17563 | CG  | TYR | A | 537 | -34.263 | -0.647 | 4.376  | 1.00 | 0.00 | D | C |
| ATOM | 17564 | CD1 | TYR | A | 537 | -34.061 | -0.260 | 5.677  | 1.00 | 0.00 | D | C |
| ATOM | 17565 | CE1 | TYR | A | 537 | -33.967 | 1.065  | 6.029  | 1.00 | 0.00 | D | C |
| ATOM | 17566 | CZ  | TYR | A | 537 | -34.074 | 2.027  | 5.058  | 1.00 | 0.00 | D | C |
| ATOM | 17567 | OH  | TYR | A | 537 | -33.982 | 3.393  | 5.403  | 1.00 | 0.00 | D | O |
| ATOM | 17568 | CD2 | TYR | A | 537 | -34.361 | 0.329  | 3.413  | 1.00 | 0.00 | D | C |
| ATOM | 17569 | CE2 | TYR | A | 537 | -34.271 | 1.657  | 3.750  | 1.00 | 0.00 | D | C |
| ATOM | 17570 | C   | TYR | A | 537 | -32.076 | -1.678 | 3.219  | 1.00 | 0.00 | D | C |
| ATOM | 17571 | O   | TYR | A | 537 | -31.922 | -1.605 | 2.001  | 1.00 | 0.00 | D | O |
| ATOM | 17572 | N   | VAL | A | 538 | -31.428 | -0.859 | 4.066  | 1.00 | 0.00 | D | N |
| ATOM | 17573 | CA  | VAL | A | 538 | -30.635 | 0.237  | 3.581  | 1.00 | 0.00 | D | C |
| ATOM | 17574 | CB  | VAL | A | 538 | -29.924 | 0.974  | 4.676  | 1.00 | 0.00 | D | C |

|      |       |               |         |        |        |      |      |   |   |
|------|-------|---------------|---------|--------|--------|------|------|---|---|
| ATOM | 17575 | CG1 VAL A 538 | -28.874 | 0.042  | 5.302  | 1.00 | 0.00 | D | C |
| ATOM | 17576 | CG2 VAL A 538 | -29.350 | 2.279  | 4.094  | 1.00 | 0.00 | D | C |
| ATOM | 17577 | C VAL A 538   | -29.610 | -0.231 | 2.594  | 1.00 | 0.00 | D | C |
| ATOM | 17578 | O VAL A 538   | -29.463 | 0.396  | 1.546  | 1.00 | 0.00 | D | O |
| ATOM | 17579 | N ALA A 539   | -28.932 | -1.369 | 2.852  | 1.00 | 0.00 | D | N |
| ATOM | 17580 | CA ALA A 539  | -27.853 | -1.804 | 2.004  | 1.00 | 0.00 | D | C |
| ATOM | 17581 | CB ALA A 539  | -27.293 | -3.185 | 2.393  | 1.00 | 0.00 | D | C |
| ATOM | 17582 | C ALA A 539   | -28.362 | -1.912 | 0.601  | 1.00 | 0.00 | D | C |
| ATOM | 17583 | O ALA A 539   | -27.661 | -1.554 | -0.345 | 1.00 | 0.00 | D | O |
| ATOM | 17584 | N SER A 540   | -29.603 | -2.395 | 0.429  | 1.00 | 0.00 | D | N |
| ATOM | 17585 | CA SER A 540  | -30.175 | -2.517 | -0.882 | 1.00 | 0.00 | D | C |
| ATOM | 17586 | CB SER A 540  | -31.579 | -3.145 | -0.856 | 1.00 | 0.00 | D | C |
| ATOM | 17587 | OG SER A 540  | -31.506 | -4.478 | -0.375 | 1.00 | 0.00 | D | O |
| ATOM | 17588 | C SER A 540   | -30.311 | -1.151 | -1.490 | 1.00 | 0.00 | D | C |
| ATOM | 17589 | O SER A 540   | -30.055 | -0.962 | -2.679 | 1.00 | 0.00 | D | O |
| ATOM | 17590 | N MET A 541   | -30.723 | -0.156 | -0.682 | 1.00 | 0.00 | D | N |
| ATOM | 17591 | CA MET A 541  | -30.890 | 1.183  | -1.174 | 1.00 | 0.00 | D | C |
| ATOM | 17592 | CB MET A 541  | -31.449 | 2.164  | -0.131 | 1.00 | 0.00 | D | C |
| ATOM | 17593 | CG MET A 541  | -32.917 | 1.932  | 0.219  | 1.00 | 0.00 | D | C |
| ATOM | 17594 | SD MET A 541  | -33.637 | 3.268  | 1.217  | 1.00 | 0.00 | D | S |
| ATOM | 17595 | CE MET A 541  | -33.499 | 4.514  | -0.100 | 1.00 | 0.00 | D | C |
| ATOM | 17596 | C MET A 541   | -29.556 | 1.714  | -1.590 | 1.00 | 0.00 | D | C |
| ATOM | 17597 | O MET A 541   | -29.443 | 2.417  | -2.595 | 1.00 | 0.00 | D | O |
| ATOM | 17598 | N VAL A 542   | -28.502 | 1.373  | -0.827 | 1.00 | 0.00 | D | N |
| ATOM | 17599 | CA VAL A 542  | -27.185 | 1.872  | -1.103 | 1.00 | 0.00 | D | C |
| ATOM | 17600 | CB VAL A 542  | -26.139 | 1.291  | -0.197 | 1.00 | 0.00 | D | C |
| ATOM | 17601 | CG1 VAL A 542 | -24.760 | 1.760  | -0.689 | 1.00 | 0.00 | D | C |
| ATOM | 17602 | CG2 VAL A 542 | -26.449 | 1.696  | 1.253  | 1.00 | 0.00 | D | C |
| ATOM | 17603 | C VAL A 542   | -26.828 | 1.466  | -2.492 | 1.00 | 0.00 | D | C |
| ATOM | 17604 | O VAL A 542   | -26.263 | 2.255  | -3.249 | 1.00 | 0.00 | D | O |
| ATOM | 17605 | N PHE A 543   | -27.155 | 0.219  | -2.872 | 1.00 | 0.00 | D | N |
| ATOM | 17606 | CA PHE A 543  | -26.877 | -0.198 | -4.217 | 1.00 | 0.00 | D | C |
| ATOM | 17607 | CB PHE A 543  | -27.372 | -1.616 | -4.564 | 1.00 | 0.00 | D | C |
| ATOM | 17608 | CG PHE A 543  | -26.306 | -2.606 | -4.278 | 1.00 | 0.00 | D | C |
| ATOM | 17609 | CD1 PHE A 543 | -26.053 | -3.055 | -3.004 | 1.00 | 0.00 | D | C |
| ATOM | 17610 | CE1 PHE A 543 | -25.056 | -3.979 | -2.787 | 1.00 | 0.00 | D | C |
| ATOM | 17611 | CZ PHE A 543  | -24.314 | -4.463 | -3.838 | 1.00 | 0.00 | D | C |
| ATOM | 17612 | CD2 PHE A 543 | -25.563 | -3.102 | -5.325 | 1.00 | 0.00 | D | C |

|      |       |               |         |        |         |      |      |   |   |
|------|-------|---------------|---------|--------|---------|------|------|---|---|
| ATOM | 17613 | CE2 PHE A 543 | -24.568 | -4.024 | -5.114  | 1.00 | 0.00 | D | C |
| ATOM | 17614 | C PHE A 543   | -27.626 | 0.694  | -5.148  | 1.00 | 0.00 | D | C |
| ATOM | 17615 | O PHE A 543   | -27.096 | 1.121  | -6.174  | 1.00 | 0.00 | D | O |
| ATOM | 17616 | N SER A 544   | -28.885 | 0.995  | -4.805  | 1.00 | 0.00 | D | N |
| ATOM | 17617 | CA SER A 544  | -29.741 | 1.747  | -5.676  | 1.00 | 0.00 | D | C |
| ATOM | 17618 | CB SER A 544  | -31.150 | 1.940  | -5.080  | 1.00 | 0.00 | D | C |
| ATOM | 17619 | OG SER A 544  | -31.968 | 2.692  | -5.964  | 1.00 | 0.00 | D | O |
| ATOM | 17620 | C SER A 544   | -29.179 | 3.109  | -5.952  | 1.00 | 0.00 | D | C |
| ATOM | 17621 | O SER A 544   | -29.194 | 3.558  | -7.097  | 1.00 | 0.00 | D | O |
| ATOM | 17622 | N LEU A 545   | -28.674 | 3.809  | -4.921  | 1.00 | 0.00 | D | N |
| ATOM | 17623 | CA LEU A 545  | -28.215 | 5.160  | -5.111  | 1.00 | 0.00 | D | C |
| ATOM | 17624 | CB LEU A 545  | -27.773 | 5.837  | -3.807  | 1.00 | 0.00 | D | C |
| ATOM | 17625 | CG LEU A 545  | -27.284 | 7.278  | -4.033  | 1.00 | 0.00 | D | C |
| ATOM | 17626 | CD1 LEU A 545 | -28.411 | 8.189  | -4.540  | 1.00 | 0.00 | D | C |
| ATOM | 17627 | CD2 LEU A 545 | -26.597 | 7.835  | -2.782  | 1.00 | 0.00 | D | C |
| ATOM | 17628 | C LEU A 545   | -27.039 | 5.227  | -6.035  | 1.00 | 0.00 | D | C |
| ATOM | 17629 | O LEU A 545   | -27.000 | 6.080  | -6.922  | 1.00 | 0.00 | D | O |
| ATOM | 17630 | N ALA A 546   | -26.031 | 4.358  | -5.817  | 1.00 | 0.00 | D | N |
| ATOM | 17631 | CA ALA A 546  | -24.818 | 4.326  | -6.592  | 1.00 | 0.00 | D | C |
| ATOM | 17632 | CB ALA A 546  | -23.774 | 3.356  | -6.013  | 1.00 | 0.00 | D | C |
| ATOM | 17633 | C ALA A 546   | -25.100 | 3.887  | -7.994  | 1.00 | 0.00 | D | C |
| ATOM | 17634 | O ALA A 546   | -24.570 | 4.452  | -8.950  | 1.00 | 0.00 | D | O |
| ATOM | 17635 | N LEU A 547   | -25.954 | 2.861  | -8.147  | 1.00 | 0.00 | D | N |
| ATOM | 17636 | CA LEU A 547  | -26.224 | 2.304  | -9.438  | 1.00 | 0.00 | D | C |
| ATOM | 17637 | CB LEU A 547  | -27.214 | 1.125  | -9.391  | 1.00 | 0.00 | D | C |
| ATOM | 17638 | CG LEU A 547  | -26.680 | -0.125 | -8.664  | 1.00 | 0.00 | D | C |
| ATOM | 17639 | CD1 LEU A 547 | -27.712 | -1.265 | -8.691  | 1.00 | 0.00 | D | C |
| ATOM | 17640 | CD2 LEU A 547 | -25.313 | -0.553 | -9.222  | 1.00 | 0.00 | D | C |
| ATOM | 17641 | C LEU A 547   | -26.848 | 3.356  | -10.296 | 1.00 | 0.00 | D | C |
| ATOM | 17642 | O LEU A 547   | -26.523 | 3.483  | -11.475 | 1.00 | 0.00 | D | O |
| ATOM | 17643 | N GLY A 548   | -27.770 | 4.145  | -9.719  | 1.00 | 0.00 | D | N |
| ATOM | 17644 | CA GLY A 548  | -28.448 | 5.146  | -10.487 | 1.00 | 0.00 | D | C |
| ATOM | 17645 | C GLY A 548   | -27.457 | 6.148  | -10.989 | 1.00 | 0.00 | D | C |
| ATOM | 17646 | O GLY A 548   | -27.529 | 6.577  | -12.139 | 1.00 | 0.00 | D | O |
| ATOM | 17647 | N TRP A 549   | -26.496 | 6.555  | -10.137 | 1.00 | 0.00 | D | N |
| ATOM | 17648 | CA TRP A 549  | -25.544 | 7.538  | -10.567 | 1.00 | 0.00 | D | C |
| ATOM | 17649 | CB TRP A 549  | -24.562 | 7.992  | -9.474  | 1.00 | 0.00 | D | C |
| ATOM | 17650 | CG TRP A 549  | -25.159 | 8.995  | -8.523  | 1.00 | 0.00 | D | C |

|      |       |               |         |        |         |      |      |   |   |
|------|-------|---------------|---------|--------|---------|------|------|---|---|
| ATOM | 17651 | CD1 TRP A 549 | -25.529 | 8.885  | -7.213  | 1.00 | 0.00 | D | C |
| ATOM | 17652 | NE1 TRP A 549 | -26.052 | 10.077 | -6.773  | 1.00 | 0.00 | D | N |
| ATOM | 17653 | CE2 TRP A 549 | -26.029 | 10.979 | -7.818  | 1.00 | 0.00 | D | C |
| ATOM | 17654 | CD2 TRP A 549 | -25.479 | 10.335 | -8.927  | 1.00 | 0.00 | D | C |
| ATOM | 17655 | CE3 TRP A 549 | -25.327 | 10.971 | -10.124 | 1.00 | 0.00 | D | C |
| ATOM | 17656 | CZ3 TRP A 549 | -25.737 | 12.283 | -10.196 | 1.00 | 0.00 | D | C |
| ATOM | 17657 | CZ2 TRP A 549 | -26.439 | 12.280 | -7.894  | 1.00 | 0.00 | D | C |
| ATOM | 17658 | CH2 TRP A 549 | -26.280 | 12.924 | -9.103  | 1.00 | 0.00 | D | C |
| ATOM | 17659 | C TRP A 549   | -24.747 | 7.009  | -11.713 | 1.00 | 0.00 | D | C |
| ATOM | 17660 | O TRP A 549   | -24.535 | 7.711  | -12.699 | 1.00 | 0.00 | D | O |
| ATOM | 17661 | N THR A 550   | -24.302 | 5.745  | -11.630 | 1.00 | 0.00 | D | N |
| ATOM | 17662 | CA THR A 550  | -23.488 | 5.202  | -12.679 | 1.00 | 0.00 | D | C |
| ATOM | 17663 | CB THR A 550  | -23.044 | 3.796  | -12.400 | 1.00 | 0.00 | D | C |
| ATOM | 17664 | OG1 THR A 550 | -24.154 | 2.912  | -12.385 | 1.00 | 0.00 | D | O |
| ATOM | 17665 | CG2 THR A 550 | -22.351 | 3.784  | -11.027 | 1.00 | 0.00 | D | C |
| ATOM | 17666 | C THR A 550   | -24.298 | 5.209  | -13.940 | 1.00 | 0.00 | D | C |
| ATOM | 17667 | O THR A 550   | -23.774 | 5.463  | -15.023 | 1.00 | 0.00 | D | O |
| ATOM | 17668 | N ASN A 551   | -25.609 | 4.934  | -13.819 | 1.00 | 0.00 | D | N |
| ATOM | 17669 | CA ASN A 551  | -26.521 | 4.878  | -14.931 | 1.00 | 0.00 | D | C |
| ATOM | 17670 | CB ASN A 551  | -27.949 | 4.481  | -14.520 | 1.00 | 0.00 | D | C |
| ATOM | 17671 | CG ASN A 551  | -27.958 | 3.032  | -14.061 | 1.00 | 0.00 | D | C |
| ATOM | 17672 | OD1 ASN A 551 | -27.025 | 2.274  | -14.319 | 1.00 | 0.00 | D | O |
| ATOM | 17673 | ND2 ASN A 551 | -29.056 | 2.628  | -13.366 | 1.00 | 0.00 | D | N |
| ATOM | 17674 | C ASN A 551   | -26.626 | 6.233  | -15.573 | 1.00 | 0.00 | D | C |
| ATOM | 17675 | O ASN A 551   | -26.783 | 6.340  | -16.790 | 1.00 | 0.00 | D | O |
| ATOM | 17676 | N MET A 552   | -26.511 | 7.306  | -14.771 | 1.00 | 0.00 | D | N |
| ATOM | 17677 | CA MET A 552  | -26.735 | 8.661  | -15.206 | 1.00 | 0.00 | D | C |
| ATOM | 17678 | CB MET A 552  | -26.556 | 9.689  | -14.077 | 1.00 | 0.00 | D | C |
| ATOM | 17679 | CG MET A 552  | -27.102 | 11.070 | -14.446 | 1.00 | 0.00 | D | C |
| ATOM | 17680 | SD MET A 552  | -26.927 | 12.339 | -13.158 | 1.00 | 0.00 | D | S |
| ATOM | 17681 | CE MET A 552  | -25.200 | 12.739 | -13.534 | 1.00 | 0.00 | D | C |
| ATOM | 17682 | C MET A 552   | -25.778 | 9.029  | -16.301 | 1.00 | 0.00 | D | C |
| ATOM | 17683 | O MET A 552   | -26.098 | 9.837  | -17.172 | 1.00 | 0.00 | D | O |
| ATOM | 17684 | N LEU A 553   | -24.579 | 8.429  | -16.291 | 1.00 | 0.00 | D | N |
| ATOM | 17685 | CA LEU A 553  | -23.494 | 8.725  | -17.190 | 1.00 | 0.00 | D | C |
| ATOM | 17686 | CB LEU A 553  | -22.327 | 7.743  | -17.016 | 1.00 | 0.00 | D | C |
| ATOM | 17687 | CG LEU A 553  | -21.923 | 7.532  | -15.550 | 1.00 | 0.00 | D | C |
| ATOM | 17688 | CD1 LEU A 553 | -20.588 | 6.777  | -15.444 | 1.00 | 0.00 | D | C |

|      |       |     |     |   |     |         |        |         |      |      |   |   |
|------|-------|-----|-----|---|-----|---------|--------|---------|------|------|---|---|
| ATOM | 17689 | CD2 | LEU | A | 553 | -21.980 | 8.841  | -14.756 | 1.00 | 0.00 | D | C |
| ATOM | 17690 | C   | LEU | A | 553 | -23.951 | 8.513  | -18.609 | 1.00 | 0.00 | D | C |
| ATOM | 17691 | O   | LEU | A | 553 | -23.433 | 9.126  | -19.541 | 1.00 | 0.00 | D | O |
| ATOM | 17692 | N   | TYR | A | 554 | -24.921 | 7.604  | -18.788 | 1.00 | 0.00 | D | N |
| ATOM | 17693 | CA  | TYR | A | 554 | -25.486 | 7.153  | -20.033 | 1.00 | 0.00 | D | C |
| ATOM | 17694 | CB  | TYR | A | 554 | -26.556 | 6.078  | -19.748 | 1.00 | 0.00 | D | C |
| ATOM | 17695 | CG  | TYR | A | 554 | -27.679 | 6.108  | -20.727 | 1.00 | 0.00 | D | C |
| ATOM | 17696 | CD1 | TYR | A | 554 | -27.546 | 5.714  | -22.038 | 1.00 | 0.00 | D | C |
| ATOM | 17697 | CE1 | TYR | A | 554 | -28.634 | 5.755  | -22.886 | 1.00 | 0.00 | D | C |
| ATOM | 17698 | CZ  | TYR | A | 554 | -29.860 | 6.179  | -22.430 | 1.00 | 0.00 | D | C |
| ATOM | 17699 | OH  | TYR | A | 554 | -30.974 | 6.220  | -23.295 | 1.00 | 0.00 | D | O |
| ATOM | 17700 | CD2 | TYR | A | 554 | -28.914 | 6.519  | -20.281 | 1.00 | 0.00 | D | C |
| ATOM | 17701 | CE2 | TYR | A | 554 | -30.001 | 6.560  | -21.120 | 1.00 | 0.00 | D | C |
| ATOM | 17702 | C   | TYR | A | 554 | -26.079 | 8.265  | -20.858 | 1.00 | 0.00 | D | C |
| ATOM | 17703 | O   | TYR | A | 554 | -25.933 | 8.270  | -22.080 | 1.00 | 0.00 | D | O |
| ATOM | 17704 | N   | TYR | A | 555 | -26.722 | 9.256  | -20.223 | 1.00 | 0.00 | D | N |
| ATOM | 17705 | CA  | TYR | A | 555 | -27.406 | 10.310 | -20.925 | 1.00 | 0.00 | D | C |
| ATOM | 17706 | CB  | TYR | A | 555 | -28.072 | 11.363 | -20.017 | 1.00 | 0.00 | D | C |
| ATOM | 17707 | CG  | TYR | A | 555 | -29.399 | 10.847 | -19.571 | 1.00 | 0.00 | D | C |
| ATOM | 17708 | CD1 | TYR | A | 555 | -30.488 | 10.987 | -20.403 | 1.00 | 0.00 | D | C |
| ATOM | 17709 | CE1 | TYR | A | 555 | -31.728 | 10.531 | -20.030 | 1.00 | 0.00 | D | C |
| ATOM | 17710 | CZ  | TYR | A | 555 | -31.893 | 9.925  | -18.809 | 1.00 | 0.00 | D | C |
| ATOM | 17711 | OH  | TYR | A | 555 | -33.168 | 9.457  | -18.427 | 1.00 | 0.00 | D | O |
| ATOM | 17712 | CD2 | TYR | A | 555 | -29.573 | 10.241 | -18.347 | 1.00 | 0.00 | D | C |
| ATOM | 17713 | CE2 | TYR | A | 555 | -30.814 | 9.780  | -17.968 | 1.00 | 0.00 | D | C |
| ATOM | 17714 | C   | TYR | A | 555 | -26.482 | 11.021 | -21.854 | 1.00 | 0.00 | D | C |
| ATOM | 17715 | O   | TYR | A | 555 | -26.920 | 11.580 | -22.855 | 1.00 | 0.00 | D | O |
| ATOM | 17716 | N   | THR | A | 556 | -25.186 | 11.059 | -21.539 | 1.00 | 0.00 | D | N |
| ATOM | 17717 | CA  | THR | A | 556 | -24.247 | 11.783 | -22.340 | 1.00 | 0.00 | D | C |
| ATOM | 17718 | CB  | THR | A | 556 | -22.877 | 11.774 | -21.747 | 1.00 | 0.00 | D | C |
| ATOM | 17719 | OG1 | THR | A | 556 | -22.943 | 12.175 | -20.386 | 1.00 | 0.00 | D | O |
| ATOM | 17720 | CG2 | THR | A | 556 | -22.052 | 12.820 | -22.507 | 1.00 | 0.00 | D | C |
| ATOM | 17721 | C   | THR | A | 556 | -24.212 | 11.186 | -23.723 | 1.00 | 0.00 | D | C |
| ATOM | 17722 | O   | THR | A | 556 | -23.771 | 11.831 | -24.670 | 1.00 | 0.00 | D | O |
| ATOM | 17723 | N   | ARG | A | 557 | -24.652 | 9.923  | -23.884 | 1.00 | 0.00 | D | N |
| ATOM | 17724 | CA  | ARG | A | 557 | -24.597 | 9.233  | -25.149 | 1.00 | 0.00 | D | C |
| ATOM | 17725 | CB  | ARG | A | 557 | -25.235 | 7.833  | -25.087 | 1.00 | 0.00 | D | C |
| ATOM | 17726 | CG  | ARG | A | 557 | -24.457 | 6.871  | -24.185 | 1.00 | 0.00 | D | C |

|      |       |     |     |   |     |         |        |         |      |      |   |   |
|------|-------|-----|-----|---|-----|---------|--------|---------|------|------|---|---|
| ATOM | 17727 | CD  | ARG | A | 557 | -25.153 | 5.531  | -23.925 | 1.00 | 0.00 | D | C |
| ATOM | 17728 | NE  | ARG | A | 557 | -25.004 | 4.681  | -25.139 | 1.00 | 0.00 | D | N |
| ATOM | 17729 | CZ  | ARG | A | 557 | -24.975 | 3.322  | -25.034 | 1.00 | 0.00 | D | C |
| ATOM | 17730 | NH1 | ARG | A | 557 | -25.043 | 2.709  | -23.813 | 1.00 | 0.00 | D | N |
| ATOM | 17731 | NH2 | ARG | A | 557 | -24.871 | 2.563  | -26.165 | 1.00 | 0.00 | D | N |
| ATOM | 17732 | C   | ARG | A | 557 | -25.259 | 10.011 | -26.251 | 1.00 | 0.00 | D | C |
| ATOM | 17733 | O   | ARG | A | 557 | -26.254 | 10.712 | -26.057 | 1.00 | 0.00 | D | O |
| ATOM | 17734 | N   | GLY | A | 558 | -24.702 | 9.850  | -27.472 | 1.00 | 0.00 | D | N |
| ATOM | 17735 | CA  | GLY | A | 558 | -25.138 | 10.547 | -28.646 | 1.00 | 0.00 | D | C |
| ATOM | 17736 | C   | GLY | A | 558 | -24.172 | 11.659 | -28.932 | 1.00 | 0.00 | D | C |
| ATOM | 17737 | O   | GLY | A | 558 | -24.366 | 12.426 | -29.873 | 1.00 | 0.00 | D | O |
| ATOM | 17738 | N   | PHE | A | 559 | -23.101 | 11.788 | -28.122 | 1.00 | 0.00 | D | N |
| ATOM | 17739 | CA  | PHE | A | 559 | -22.124 | 12.815 | -28.368 | 1.00 | 0.00 | D | C |
| ATOM | 17740 | CB  | PHE | A | 559 | -21.848 | 13.682 | -27.127 | 1.00 | 0.00 | D | C |
| ATOM | 17741 | CG  | PHE | A | 559 | -23.100 | 14.476 | -26.947 | 1.00 | 0.00 | D | C |
| ATOM | 17742 | CD1 | PHE | A | 559 | -24.215 | 13.897 | -26.388 | 1.00 | 0.00 | D | C |
| ATOM | 17743 | CE1 | PHE | A | 559 | -25.385 | 14.596 | -26.222 | 1.00 | 0.00 | D | C |
| ATOM | 17744 | CZ  | PHE | A | 559 | -25.447 | 15.903 | -26.636 | 1.00 | 0.00 | D | C |
| ATOM | 17745 | CD2 | PHE | A | 559 | -23.182 | 15.781 | -27.375 | 1.00 | 0.00 | D | C |
| ATOM | 17746 | CE2 | PHE | A | 559 | -24.348 | 16.494 | -27.214 | 1.00 | 0.00 | D | C |
| ATOM | 17747 | C   | PHE | A | 559 | -20.895 | 12.125 | -28.844 | 1.00 | 0.00 | D | C |
| ATOM | 17748 | O   | PHE | A | 559 | -20.571 | 11.046 | -28.378 | 1.00 | 0.00 | D | O |
| ATOM | 17749 | N   | GLN | A | 560 | -20.175 | 12.685 | -29.824 | 1.00 | 0.00 | D | N |
| ATOM | 17750 | CA  | GLN | A | 560 | -19.091 | 11.959 | -30.417 | 1.00 | 0.00 | D | C |
| ATOM | 17751 | CB  | GLN | A | 560 | -18.410 | 12.751 | -31.546 | 1.00 | 0.00 | D | C |
| ATOM | 17752 | CG  | GLN | A | 560 | -19.298 | 13.055 | -32.755 | 1.00 | 0.00 | D | C |
| ATOM | 17753 | CD  | GLN | A | 560 | -20.126 | 14.314 | -32.511 | 1.00 | 0.00 | D | C |
| ATOM | 17754 | OE1 | GLN | A | 560 | -20.349 | 14.766 | -31.392 | 1.00 | 0.00 | D | O |
| ATOM | 17755 | NE2 | GLN | A | 560 | -20.605 | 14.911 | -33.636 | 1.00 | 0.00 | D | N |
| ATOM | 17756 | C   | GLN | A | 560 | -18.020 | 11.668 | -29.415 | 1.00 | 0.00 | D | C |
| ATOM | 17757 | O   | GLN | A | 560 | -17.542 | 10.541 | -29.316 | 1.00 | 0.00 | D | O |
| ATOM | 17758 | N   | GLN | A | 561 | -17.590 | 12.683 | -28.649 | 1.00 | 0.00 | D | N |
| ATOM | 17759 | CA  | GLN | A | 561 | -16.539 | 12.434 | -27.708 | 1.00 | 0.00 | D | C |
| ATOM | 17760 | CB  | GLN | A | 561 | -16.080 | 13.716 | -26.990 | 1.00 | 0.00 | D | C |
| ATOM | 17761 | CG  | GLN | A | 561 | -15.336 | 14.726 | -27.869 | 1.00 | 0.00 | D | C |
| ATOM | 17762 | CD  | GLN | A | 561 | -13.854 | 14.385 | -27.802 | 1.00 | 0.00 | D | C |
| ATOM | 17763 | OE1 | GLN | A | 561 | -13.486 | 13.253 | -27.494 | 1.00 | 0.00 | D | O |
| ATOM | 17764 | NE2 | GLN | A | 561 | -12.982 | 15.390 | -28.085 | 1.00 | 0.00 | D | N |



|      |       |     |           |         |        |         |      |      |   |   |
|------|-------|-----|-----------|---------|--------|---------|------|------|---|---|
| ATOM | 17765 | C   | GLN A 561 | -17.046 | 11.524 | -26.633 | 1.00 | 0.00 | D | C |
| ATOM | 17766 | O   | GLN A 561 | -16.426 | 10.515 | -26.299 | 1.00 | 0.00 | D | O |
| ATOM | 17767 | N   | MET A 562 | -18.220 | 11.875 | -26.080 | 1.00 | 0.00 | D | N |
| ATOM | 17768 | CA  | MET A 562 | -18.795 | 11.228 | -24.937 | 1.00 | 0.00 | D | C |
| ATOM | 17769 | CB  | MET A 562 | -20.025 | 11.991 | -24.455 | 1.00 | 0.00 | D | C |
| ATOM | 17770 | CG  | MET A 562 | -19.726 | 13.472 | -24.234 | 1.00 | 0.00 | D | C |
| ATOM | 17771 | SD  | MET A 562 | -18.249 | 13.783 | -23.223 | 1.00 | 0.00 | D | S |
| ATOM | 17772 | CE  | MET A 562 | -18.902 | 12.990 | -21.724 | 1.00 | 0.00 | D | C |
| ATOM | 17773 | C   | MET A 562 | -19.236 | 9.830  | -25.223 | 1.00 | 0.00 | D | C |
| ATOM | 17774 | O   | MET A 562 | -19.008 | 8.906  | -24.450 | 1.00 | 0.00 | D | O |
| ATOM | 17775 | N   | GLY A 563 | -19.876 | 9.662  | -26.378 | 1.00 | 0.00 | D | N |
| ATOM | 17776 | CA  | GLY A 563 | -20.494 | 8.462  | -26.843 | 1.00 | 0.00 | D | C |
| ATOM | 17777 | C   | GLY A 563 | -19.442 | 7.427  | -26.951 | 1.00 | 0.00 | D | C |
| ATOM | 17778 | O   | GLY A 563 | -19.674 | 6.258  | -26.657 | 1.00 | 0.00 | D | O |
| ATOM | 17779 | N   | ILE A 564 | -18.245 | 7.831  | -27.399 | 1.00 | 0.00 | D | N |
| ATOM | 17780 | CA  | ILE A 564 | -17.219 | 6.854  | -27.575 | 1.00 | 0.00 | D | C |
| ATOM | 17781 | CB  | ILE A 564 | -15.992 | 7.397  | -28.229 | 1.00 | 0.00 | D | C |
| ATOM | 17782 | CG2 | ILE A 564 | -14.976 | 6.254  | -28.378 | 1.00 | 0.00 | D | C |
| ATOM | 17783 | CG1 | ILE A 564 | -16.409 | 8.062  | -29.548 | 1.00 | 0.00 | D | C |
| ATOM | 17784 | CD  | ILE A 564 | -17.479 | 7.278  | -30.308 | 1.00 | 0.00 | D | C |
| ATOM | 17785 | C   | ILE A 564 | -16.846 | 6.271  | -26.245 | 1.00 | 0.00 | D | C |
| ATOM | 17786 | O   | ILE A 564 | -16.665 | 5.062  | -26.124 | 1.00 | 0.00 | D | O |
| ATOM | 17787 | N   | TYR A 565 | -16.731 | 7.113  | -25.203 | 1.00 | 0.00 | D | N |
| ATOM | 17788 | CA  | TYR A 565 | -16.302 | 6.629  | -23.921 | 1.00 | 0.00 | D | C |
| ATOM | 17789 | CB  | TYR A 565 | -16.008 | 7.770  | -22.936 | 1.00 | 0.00 | D | C |
| ATOM | 17790 | CG  | TYR A 565 | -14.727 | 8.353  | -23.428 | 1.00 | 0.00 | D | C |
| ATOM | 17791 | CD1 | TYR A 565 | -14.715 | 9.331  | -24.395 | 1.00 | 0.00 | D | C |
| ATOM | 17792 | CE1 | TYR A 565 | -13.526 | 9.849  | -24.846 | 1.00 | 0.00 | D | C |
| ATOM | 17793 | CZ  | TYR A 565 | -12.334 | 9.389  | -24.339 | 1.00 | 0.00 | D | C |
| ATOM | 17794 | OH  | TYR A 565 | -11.114 | 9.923  | -24.805 | 1.00 | 0.00 | D | O |
| ATOM | 17795 | CD2 | TYR A 565 | -13.528 | 7.890  | -22.933 | 1.00 | 0.00 | D | C |
| ATOM | 17796 | CE2 | TYR A 565 | -12.335 | 8.404  | -23.380 | 1.00 | 0.00 | D | C |
| ATOM | 17797 | C   | TYR A 565 | -17.285 | 5.668  | -23.325 | 1.00 | 0.00 | D | C |
| ATOM | 17798 | O   | TYR A 565 | -16.889 | 4.635  | -22.786 | 1.00 | 0.00 | D | O |
| ATOM | 17799 | N   | ALA A 566 | -18.594 | 5.964  | -23.407 | 1.00 | 0.00 | D | N |
| ATOM | 17800 | CA  | ALA A 566 | -19.557 | 5.081  | -22.807 | 1.00 | 0.00 | D | C |
| ATOM | 17801 | CB  | ALA A 566 | -21.006 | 5.566  | -22.967 | 1.00 | 0.00 | D | C |
| ATOM | 17802 | C   | ALA A 566 | -19.468 | 3.750  | -23.479 | 1.00 | 0.00 | D | C |

|      |       |     |           |         |        |         |      |      |   |   |
|------|-------|-----|-----------|---------|--------|---------|------|------|---|---|
| ATOM | 17803 | O   | ALA A 566 | -19.503 | 2.709  | -22.827 | 1.00 | 0.00 | D | O |
| ATOM | 17804 | N   | VAL A 567 | -19.338 | 3.764  | -24.816 | 1.00 | 0.00 | D | N |
| ATOM | 17805 | CA  | VAL A 567 | -19.315 | 2.551  | -25.576 | 1.00 | 0.00 | D | C |
| ATOM | 17806 | CB  | VAL A 567 | -19.225 | 2.794  | -27.054 | 1.00 | 0.00 | D | C |
| ATOM | 17807 | CG1 | VAL A 567 | -19.147 | 1.434  | -27.770 | 1.00 | 0.00 | D | C |
| ATOM | 17808 | CG2 | VAL A 567 | -20.430 | 3.650  | -27.481 | 1.00 | 0.00 | D | C |
| ATOM | 17809 | C   | VAL A 567 | -18.129 | 1.737  | -25.158 | 1.00 | 0.00 | D | C |
| ATOM | 17810 | O   | VAL A 567 | -18.233 | 0.525  | -24.981 | 1.00 | 0.00 | D | O |
| ATOM | 17811 | N   | MET A 568 | -16.963 | 2.381  | -24.973 | 1.00 | 0.00 | D | N |
| ATOM | 17812 | CA  | MET A 568 | -15.790 | 1.626  | -24.637 | 1.00 | 0.00 | D | C |
| ATOM | 17813 | CB  | MET A 568 | -14.494 | 2.454  | -24.636 | 1.00 | 0.00 | D | C |
| ATOM | 17814 | CG  | MET A 568 | -14.440 | 3.562  | -23.587 | 1.00 | 0.00 | D | C |
| ATOM | 17815 | SD  | MET A 568 | -12.857 | 4.452  | -23.558 | 1.00 | 0.00 | D | S |
| ATOM | 17816 | CE  | MET A 568 | -13.015 | 5.090  | -25.252 | 1.00 | 0.00 | D | C |
| ATOM | 17817 | C   | MET A 568 | -15.971 | 0.999  | -23.294 | 1.00 | 0.00 | D | C |
| ATOM | 17818 | O   | MET A 568 | -15.568 | -0.143 | -23.075 | 1.00 | 0.00 | D | O |
| ATOM | 17819 | N   | ILE A 569 | -16.596 | 1.733  | -22.356 | 1.00 | 0.00 | D | N |
| ATOM | 17820 | CA  | ILE A 569 | -16.800 | 1.227  | -21.031 | 1.00 | 0.00 | D | C |
| ATOM | 17821 | CB  | ILE A 569 | -17.497 | 2.212  | -20.144 | 1.00 | 0.00 | D | C |
| ATOM | 17822 | CG2 | ILE A 569 | -18.021 | 1.458  | -18.920 | 1.00 | 0.00 | D | C |
| ATOM | 17823 | CG1 | ILE A 569 | -16.583 | 3.402  | -19.819 | 1.00 | 0.00 | D | C |
| ATOM | 17824 | CD  | ILE A 569 | -17.312 | 4.552  | -19.128 | 1.00 | 0.00 | D | C |
| ATOM | 17825 | C   | ILE A 569 | -17.668 | 0.017  | -21.097 | 1.00 | 0.00 | D | C |
| ATOM | 17826 | O   | ILE A 569 | -17.386 | -0.996 | -20.461 | 1.00 | 0.00 | D | O |
| ATOM | 17827 | N   | GLU A 570 | -18.751 | 0.084  | -21.883 | 1.00 | 0.00 | D | N |
| ATOM | 17828 | CA  | GLU A 570 | -19.638 | -1.035 | -21.943 | 1.00 | 0.00 | D | C |
| ATOM | 17829 | CB  | GLU A 570 | -20.921 | -0.733 | -22.714 | 1.00 | 0.00 | D | C |
| ATOM | 17830 | CG  | GLU A 570 | -21.841 | 0.123  | -21.852 | 1.00 | 0.00 | D | C |
| ATOM | 17831 | CD  | GLU A 570 | -22.815 | 0.807  | -22.775 | 1.00 | 0.00 | D | C |
| ATOM | 17832 | OE1 | GLU A 570 | -23.838 | 0.176  | -23.147 | 1.00 | 0.00 | D | O |
| ATOM | 17833 | OE2 | GLU A 570 | -22.537 | 1.984  | -23.126 | 1.00 | 0.00 | D | O |
| ATOM | 17834 | C   | GLU A 570 | -18.927 | -2.202 | -22.540 | 1.00 | 0.00 | D | C |
| ATOM | 17835 | O   | GLU A 570 | -19.148 | -3.336 | -22.126 | 1.00 | 0.00 | D | O |
| ATOM | 17836 | N   | LYS A 571 | -18.043 | -1.952 | -23.521 | 1.00 | 0.00 | D | N |
| ATOM | 17837 | CA  | LYS A 571 | -17.327 | -3.013 | -24.171 | 1.00 | 0.00 | D | C |
| ATOM | 17838 | CB  | LYS A 571 | -16.369 | -2.509 | -25.263 | 1.00 | 0.00 | D | C |
| ATOM | 17839 | CG  | LYS A 571 | -15.517 | -3.624 | -25.878 | 1.00 | 0.00 | D | C |
| ATOM | 17840 | CD  | LYS A 571 | -16.292 | -4.627 | -26.735 | 1.00 | 0.00 | D | C |

|      |       |     |     |   |     |         |        |         |      |      |   |   |
|------|-------|-----|-----|---|-----|---------|--------|---------|------|------|---|---|
| ATOM | 17841 | CE  | LYS | A | 571 | -15.412 | -5.753 | -27.284 | 1.00 | 0.00 | D | C |
| ATOM | 17842 | NZ  | LYS | A | 571 | -16.036 | -6.349 | -28.482 | 1.00 | 0.00 | D | N |
| ATOM | 17843 | C   | LYS | A | 571 | -16.467 | -3.733 | -23.183 | 1.00 | 0.00 | D | C |
| ATOM | 17844 | O   | LYS | A | 571 | -16.374 | -4.958 | -23.201 | 1.00 | 0.00 | D | O |
| ATOM | 17845 | N   | MET | A | 572 | -15.790 | -2.993 | -22.295 | 1.00 | 0.00 | D | N |
| ATOM | 17846 | CA  | MET | A | 572 | -14.895 | -3.659 | -21.400 | 1.00 | 0.00 | D | C |
| ATOM | 17847 | CB  | MET | A | 572 | -14.055 | -2.663 | -20.588 | 1.00 | 0.00 | D | C |
| ATOM | 17848 | CG  | MET | A | 572 | -13.178 | -1.836 | -21.530 | 1.00 | 0.00 | D | C |
| ATOM | 17849 | SD  | MET | A | 572 | -12.059 | -0.631 | -20.764 | 1.00 | 0.00 | D | S |
| ATOM | 17850 | CE  | MET | A | 572 | -11.459 | -0.058 | -22.379 | 1.00 | 0.00 | D | C |
| ATOM | 17851 | C   | MET | A | 572 | -15.658 | -4.557 | -20.484 | 1.00 | 0.00 | D | C |
| ATOM | 17852 | O   | MET | A | 572 | -15.239 | -5.687 | -20.221 | 1.00 | 0.00 | D | O |
| ATOM | 17853 | N   | ILE | A | 573 | -16.796 | -4.076 | -19.967 | 1.00 | 0.00 | D | N |
| ATOM | 17854 | CA  | ILE | A | 573 | -17.601 | -4.801 | -19.029 | 1.00 | 0.00 | D | C |
| ATOM | 17855 | CB  | ILE | A | 573 | -18.661 | -3.921 | -18.435 | 1.00 | 0.00 | D | C |
| ATOM | 17856 | CG2 | ILE | A | 573 | -19.490 | -4.757 | -17.445 | 1.00 | 0.00 | D | C |
| ATOM | 17857 | CG1 | ILE | A | 573 | -17.992 | -2.697 | -17.783 | 1.00 | 0.00 | D | C |
| ATOM | 17858 | CD  | ILE | A | 573 | -18.959 | -1.569 | -17.431 | 1.00 | 0.00 | D | C |
| ATOM | 17859 | C   | ILE | A | 573 | -18.255 | -5.978 | -19.681 | 1.00 | 0.00 | D | C |
| ATOM | 17860 | O   | ILE | A | 573 | -18.283 | -7.069 | -19.116 | 1.00 | 0.00 | D | O |
| ATOM | 17861 | N   | LEU | A | 574 | -18.840 | -5.800 | -20.877 | 1.00 | 0.00 | D | N |
| ATOM | 17862 | CA  | LEU | A | 574 | -19.496 | -6.939 | -21.432 | 1.00 | 0.00 | D | C |
| ATOM | 17863 | CB  | LEU | A | 574 | -20.239 | -6.575 | -22.726 | 1.00 | 0.00 | D | C |
| ATOM | 17864 | CG  | LEU | A | 574 | -21.203 | -5.389 | -22.520 | 1.00 | 0.00 | D | C |
| ATOM | 17865 | CD1 | LEU | A | 574 | -22.012 | -5.088 | -23.786 | 1.00 | 0.00 | D | C |
| ATOM | 17866 | CD2 | LEU | A | 574 | -22.078 | -5.573 | -21.270 | 1.00 | 0.00 | D | C |
| ATOM | 17867 | C   | LEU | A | 574 | -18.473 | -7.995 | -21.757 | 1.00 | 0.00 | D | C |
| ATOM | 17868 | O   | LEU | A | 574 | -18.539 | -9.107 | -21.236 | 1.00 | 0.00 | D | O |
| ATOM | 17869 | N   | ARG | A | 575 | -17.518 | -7.678 | -22.659 | 1.00 | 0.00 | D | N |
| ATOM | 17870 | CA  | ARG | A | 575 | -16.551 | -8.649 | -23.111 | 1.00 | 0.00 | D | C |
| ATOM | 17871 | CB  | ARG | A | 575 | -15.989 | -8.234 | -24.474 | 1.00 | 0.00 | D | C |
| ATOM | 17872 | CG  | ARG | A | 575 | -17.091 | -7.906 | -25.480 | 1.00 | 0.00 | D | C |
| ATOM | 17873 | CD  | ARG | A | 575 | -17.956 | -9.110 | -25.846 | 1.00 | 0.00 | D | C |
| ATOM | 17874 | NE  | ARG | A | 575 | -18.957 | -8.648 | -26.849 | 1.00 | 0.00 | D | N |
| ATOM | 17875 | CZ  | ARG | A | 575 | -18.606 | -8.553 | -28.165 | 1.00 | 0.00 | D | C |
| ATOM | 17876 | NH1 | ARG | A | 575 | -17.338 | -8.865 | -28.560 | 1.00 | 0.00 | D | N |
| ATOM | 17877 | NH2 | ARG | A | 575 | -19.521 | -8.140 | -29.092 | 1.00 | 0.00 | D | N |
| ATOM | 17878 | C   | ARG | A | 575 | -15.351 | -8.937 | -22.242 | 1.00 | 0.00 | D | C |

ATOM 17879 O ARG A 575 -15.235 -10.004 -21.641 1.00 0.00 D O  
ATOM 17880 N ASP A 576 -14.452 -7.931 -22.117 1.00 0.00 D N  
ATOM 17881 CA ASP A 576 -13.118 -8.123 -21.594 1.00 0.00 D C  
ATOM 17882 CB ASP A 576 -12.243 -6.873 -21.815 1.00 0.00 D C  
ATOM 17883 CG ASP A 576 -10.774 -7.256 -21.709 1.00 0.00 D C  
ATOM 17884 OD1 ASP A 576 -10.445 -8.157 -20.894 1.00 0.00 D O  
ATOM 17885 OD2 ASP A 576 -9.956 -6.644 -22.450 1.00 0.00 D O  
ATOM 17886 C ASP A 576 -13.091 -8.460 -20.138 1.00 0.00 D C  
ATOM 17887 O ASP A 576 -12.460 -9.432 -19.725 1.00 0.00 D O  
ATOM 17888 N LEU A 577 -13.780 -7.651 -19.319 1.00 0.00 D N  
ATOM 17889 CA LEU A 577 -13.799 -7.858 -17.905 1.00 0.00 D C  
ATOM 17890 CB LEU A 577 -14.591 -6.775 -17.159 1.00 0.00 D C  
ATOM 17891 CG LEU A 577 -14.815 -7.127 -15.680 1.00 0.00 D C  
ATOM 17892 CD1 LEU A 577 -13.485 -7.334 -14.942 1.00 0.00 D C  
ATOM 17893 CD2 LEU A 577 -15.729 -6.102 -14.996 1.00 0.00 D C  
ATOM 17894 C LEU A 577 -14.482 -9.148 -17.627 1.00 0.00 D C  
ATOM 17895 O LEU A 577 -14.022 -9.946 -16.814 1.00 0.00 D O  
ATOM 17896 N CYS A 578 -15.601 -9.387 -18.327 1.00 0.00 D N  
ATOM 17897 CA CYS A 578 -16.385 -10.556 -18.073 1.00 0.00 D C  
ATOM 17898 CB CYS A 578 -17.644 -10.620 -18.953 1.00 0.00 D C  
ATOM 17899 SG CYS A 578 -18.647 -12.101 -18.638 1.00 0.00 D S  
ATOM 17900 C CYS A 578 -15.564 -11.766 -18.368 1.00 0.00 D C  
ATOM 17901 O CYS A 578 -15.557 -12.720 -17.594 1.00 0.00 D O  
ATOM 17902 N ARG A 579 -14.844 -11.763 -19.503 1.00 0.00 D N  
ATOM 17903 CA ARG A 579 -14.077 -12.914 -19.865 1.00 0.00 D C  
ATOM 17904 CB ARG A 579 -13.421 -12.768 -21.248 1.00 0.00 D C  
ATOM 17905 CG ARG A 579 -14.418 -12.815 -22.406 1.00 0.00 D C  
ATOM 17906 CD ARG A 579 -13.835 -12.326 -23.731 1.00 0.00 D C  
ATOM 17907 NE ARG A 579 -14.820 -12.633 -24.808 1.00 0.00 D N  
ATOM 17908 CZ ARG A 579 -14.995 -11.767 -25.846 1.00 0.00 D C  
ATOM 17909 NH1 ARG A 579 -14.312 -10.586 -25.869 1.00 0.00 D N  
ATOM 17910 NH2 ARG A 579 -15.862 -12.073 -26.857 1.00 0.00 D N  
ATOM 17911 C ARG A 579 -12.987 -13.134 -18.860 1.00 0.00 D C  
ATOM 17912 O ARG A 579 -12.759 -14.258 -18.420 1.00 0.00 D O  
ATOM 17913 N PHE A 580 -12.299 -12.049 -18.456 1.00 0.00 D N  
ATOM 17914 CA PHE A 580 -11.169 -12.129 -17.571 1.00 0.00 D C  
ATOM 17915 CB PHE A 580 -10.463 -10.776 -17.389 1.00 0.00 D C  
ATOM 17916 CG PHE A 580 -9.147 -11.070 -16.762 1.00 0.00 D C

|      |       |               |         |         |         |      |      |   |   |
|------|-------|---------------|---------|---------|---------|------|------|---|---|
| ATOM | 17917 | CD1 PHE A 580 | -8.098  | -11.484 | -17.550 | 1.00 | 0.00 | D | C |
| ATOM | 17918 | CE1 PHE A 580 | -6.874  | -11.762 | -16.993 | 1.00 | 0.00 | D | C |
| ATOM | 17919 | CZ PHE A 580  | -6.701  | -11.622 | -15.638 | 1.00 | 0.00 | D | C |
| ATOM | 17920 | CD2 PHE A 580 | -8.960  | -10.933 | -15.406 | 1.00 | 0.00 | D | C |
| ATOM | 17921 | CE2 PHE A 580 | -7.738  | -11.209 | -14.842 | 1.00 | 0.00 | D | C |
| ATOM | 17922 | C PHE A 580   | -11.598 | -12.593 | -16.221 | 1.00 | 0.00 | D | C |
| ATOM | 17923 | O PHE A 580   | -10.916 | -13.398 | -15.592 | 1.00 | 0.00 | D | O |
| ATOM | 17924 | N MET A 581   | -12.756 | -12.116 | -15.741 | 1.00 | 0.00 | D | N |
| ATOM | 17925 | CA MET A 581  | -13.157 | -12.455 | -14.412 | 1.00 | 0.00 | D | C |
| ATOM | 17926 | CB MET A 581  | -14.490 | -11.838 | -13.979 | 1.00 | 0.00 | D | C |
| ATOM | 17927 | CG MET A 581  | -14.953 | -12.425 | -12.648 | 1.00 | 0.00 | D | C |
| ATOM | 17928 | SD MET A 581  | -16.142 | -11.418 | -11.734 | 1.00 | 0.00 | D | S |
| ATOM | 17929 | CE MET A 581  | -14.867 | -10.490 | -10.831 | 1.00 | 0.00 | D | C |
| ATOM | 17930 | C MET A 581   | -13.277 | -13.933 | -14.314 | 1.00 | 0.00 | D | C |
| ATOM | 17931 | O MET A 581   | -12.965 | -14.513 | -13.276 | 1.00 | 0.00 | D | O |
| ATOM | 17932 | N PHE A 582   | -13.737 | -14.602 | -15.383 | 1.00 | 0.00 | D | N |
| ATOM | 17933 | CA PHE A 582  | -13.818 | -16.027 | -15.273 | 1.00 | 0.00 | D | C |
| ATOM | 17934 | CB PHE A 582  | -14.346 | -16.720 | -16.542 | 1.00 | 0.00 | D | C |
| ATOM | 17935 | CG PHE A 582  | -15.809 | -16.459 | -16.658 | 1.00 | 0.00 | D | C |
| ATOM | 17936 | CD1 PHE A 582 | -16.684 | -17.053 | -15.777 | 1.00 | 0.00 | D | C |
| ATOM | 17937 | CE1 PHE A 582 | -18.036 | -16.832 | -15.869 | 1.00 | 0.00 | D | C |
| ATOM | 17938 | CZ PHE A 582  | -18.530 | -16.015 | -16.860 | 1.00 | 0.00 | D | C |
| ATOM | 17939 | CD2 PHE A 582 | -16.313 | -15.652 | -17.653 | 1.00 | 0.00 | D | C |
| ATOM | 17940 | CE2 PHE A 582 | -17.666 | -15.428 | -17.751 | 1.00 | 0.00 | D | C |
| ATOM | 17941 | C PHE A 582   | -12.441 | -16.564 | -15.018 | 1.00 | 0.00 | D | C |
| ATOM | 17942 | O PHE A 582   | -12.250 | -17.384 | -14.122 | 1.00 | 0.00 | D | O |
| ATOM | 17943 | N VAL A 583   | -11.444 | -16.110 | -15.803 | 1.00 | 0.00 | D | N |
| ATOM | 17944 | CA VAL A 583  | -10.093 | -16.593 | -15.698 | 1.00 | 0.00 | D | C |
| ATOM | 17945 | CB VAL A 583  | -9.206  | -16.012 | -16.761 | 1.00 | 0.00 | D | C |
| ATOM | 17946 | CG1 VAL A 583 | -7.773  | -16.526 | -16.540 | 1.00 | 0.00 | D | C |
| ATOM | 17947 | CG2 VAL A 583 | -9.796  | -16.353 | -18.139 | 1.00 | 0.00 | D | C |
| ATOM | 17948 | C VAL A 583   | -9.475  | -16.220 | -14.378 | 1.00 | 0.00 | D | C |
| ATOM | 17949 | O VAL A 583   | -8.877  | -17.058 | -13.708 | 1.00 | 0.00 | D | O |
| ATOM | 17950 | N TYR A 584   | -9.598  | -14.947 | -13.962 | 1.00 | 0.00 | D | N |
| ATOM | 17951 | CA TYR A 584  | -8.987  | -14.503 | -12.743 | 1.00 | 0.00 | D | C |
| ATOM | 17952 | CB TYR A 584  | -9.140  | -12.991 | -12.486 | 1.00 | 0.00 | D | C |
| ATOM | 17953 | CG TYR A 584  | -8.666  | -12.711 | -11.100 | 1.00 | 0.00 | D | C |
| ATOM | 17954 | CD1 TYR A 584 | -7.350  | -12.904 | -10.742 | 1.00 | 0.00 | D | C |

|      |       |               |         |         |         |      |      |   |   |
|------|-------|---------------|---------|---------|---------|------|------|---|---|
| ATOM | 17955 | CE1 TYR A 584 | -6.923  | -12.642 | -9.459  | 1.00 | 0.00 | D | C |
| ATOM | 17956 | CZ TYR A 584  | -7.816  | -12.170 | -8.525  | 1.00 | 0.00 | D | C |
| ATOM | 17957 | OH TYR A 584  | -7.409  | -11.896 | -7.204  | 1.00 | 0.00 | D | O |
| ATOM | 17958 | CD2 TYR A 584 | -9.542  | -12.221 | -10.158 | 1.00 | 0.00 | D | C |
| ATOM | 17959 | CE2 TYR A 584 | -9.124  | -11.957 | -8.877  | 1.00 | 0.00 | D | C |
| ATOM | 17960 | C TYR A 584   | -9.604  | -15.244 | -11.613 | 1.00 | 0.00 | D | C |
| ATOM | 17961 | O TYR A 584   | -8.918  | -15.671 | -10.687 | 1.00 | 0.00 | D | O |
| ATOM | 17962 | N ILE A 585   | -10.934 | -15.423 | -11.663 | 1.00 | 0.00 | D | N |
| ATOM | 17963 | CA ILE A 585  | -11.589 | -16.135 | -10.614 | 1.00 | 0.00 | D | C |
| ATOM | 17964 | CB ILE A 585  | -13.084 | -16.121 | -10.713 | 1.00 | 0.00 | D | C |
| ATOM | 17965 | CG2 ILE A 585 | -13.632 | -17.395 | -10.052 | 1.00 | 0.00 | D | C |
| ATOM | 17966 | CG1 ILE A 585 | -13.617 | -14.815 | -10.093 | 1.00 | 0.00 | D | C |
| ATOM | 17967 | CD ILE A 585  | -13.041 | -13.548 | -10.713 | 1.00 | 0.00 | D | C |
| ATOM | 17968 | C ILE A 585   | -11.095 | -17.542 | -10.547 | 1.00 | 0.00 | D | C |
| ATOM | 17969 | O ILE A 585   | -10.864 | -18.051 | -9.452  | 1.00 | 0.00 | D | O |
| ATOM | 17970 | N VAL A 586   | -10.917 | -18.223 | -11.695 | 1.00 | 0.00 | D | N |
| ATOM | 17971 | CA VAL A 586  | -10.477 | -19.584 | -11.604 | 1.00 | 0.00 | D | C |
| ATOM | 17972 | CB VAL A 586  | -10.466 | -20.319 | -12.918 | 1.00 | 0.00 | D | C |
| ATOM | 17973 | CG1 VAL A 586 | -9.376  | -19.745 | -13.838 | 1.00 | 0.00 | D | C |
| ATOM | 17974 | CG2 VAL A 586 | -10.288 | -21.817 | -12.624 | 1.00 | 0.00 | D | C |
| ATOM | 17975 | C VAL A 586   | -9.105  | -19.636 | -11.002 | 1.00 | 0.00 | D | C |
| ATOM | 17976 | O VAL A 586   | -8.856  | -20.433 | -10.100 | 1.00 | 0.00 | D | O |
| ATOM | 17977 | N PHE A 587   | -8.172  | -18.780 | -11.469 | 1.00 | 0.00 | D | N |
| ATOM | 17978 | CA PHE A 587  | -6.840  | -18.813 | -10.934 | 1.00 | 0.00 | D | C |
| ATOM | 17979 | CB PHE A 587  | -5.834  | -17.918 | -11.684 | 1.00 | 0.00 | D | C |
| ATOM | 17980 | CG PHE A 587  | -5.352  | -18.675 | -12.879 | 1.00 | 0.00 | D | C |
| ATOM | 17981 | CD1 PHE A 587 | -4.274  | -19.525 | -12.766 | 1.00 | 0.00 | D | C |
| ATOM | 17982 | CE1 PHE A 587 | -3.812  | -20.235 | -13.850 | 1.00 | 0.00 | D | C |
| ATOM | 17983 | CZ PHE A 587  | -4.428  | -20.096 | -15.070 | 1.00 | 0.00 | D | C |
| ATOM | 17984 | CD2 PHE A 587 | -5.962  | -18.543 | -14.104 | 1.00 | 0.00 | D | C |
| ATOM | 17985 | CE2 PHE A 587 | -5.501  | -19.249 | -15.194 | 1.00 | 0.00 | D | C |
| ATOM | 17986 | C PHE A 587   | -6.852  | -18.417 | -9.492  | 1.00 | 0.00 | D | C |
| ATOM | 17987 | O PHE A 587   | -6.214  | -19.064 | -8.662  | 1.00 | 0.00 | D | O |
| ATOM | 17988 | N LEU A 588   | -7.589  | -17.346 | -9.148  | 1.00 | 0.00 | D | N |
| ATOM | 17989 | CA LEU A 588  | -7.591  | -16.882 | -7.791  | 1.00 | 0.00 | D | C |
| ATOM | 17990 | CB LEU A 588  | -8.418  | -15.590 | -7.602  | 1.00 | 0.00 | D | C |
| ATOM | 17991 | CG LEU A 588  | -9.959  | -15.754 | -7.557  | 1.00 | 0.00 | D | C |
| ATOM | 17992 | CD1 LEU A 588 | -10.459 | -16.248 | -6.187  | 1.00 | 0.00 | D | C |

|            |     |           |         |         |        |      |      |   |   |
|------------|-----|-----------|---------|---------|--------|------|------|---|---|
| ATOM 17993 | CD2 | LEU A 588 | -10.679 | -14.473 | -7.999 | 1.00 | 0.00 | D | C |
| ATOM 17994 | C   | LEU A 588 | -8.177  | -17.943 | -6.916 | 1.00 | 0.00 | D | C |
| ATOM 17995 | O   | LEU A 588 | -7.639  | -18.261 | -5.858 | 1.00 | 0.00 | D | O |
| ATOM 17996 | N   | PHE A 589 | -9.295  | -18.540 | -7.359 | 1.00 | 0.00 | D | N |
| ATOM 17997 | CA  | PHE A 589 | -9.988  | -19.471 | -6.524 | 1.00 | 0.00 | D | C |
| ATOM 17998 | CB  | PHE A 589 | -11.318 | -19.946 | -7.126 | 1.00 | 0.00 | D | C |
| ATOM 17999 | CG  | PHE A 589 | -12.019 | -20.728 | -6.070 | 1.00 | 0.00 | D | C |
| ATOM 18000 | CD1 | PHE A 589 | -12.860 | -20.095 | -5.184 | 1.00 | 0.00 | D | C |
| ATOM 18001 | CE1 | PHE A 589 | -13.510 | -20.804 | -4.203 | 1.00 | 0.00 | D | C |
| ATOM 18002 | CZ  | PHE A 589 | -13.318 | -22.162 | -4.101 | 1.00 | 0.00 | D | C |
| ATOM 18003 | CD2 | PHE A 589 | -11.827 | -22.085 | -5.960 | 1.00 | 0.00 | D | C |
| ATOM 18004 | CE2 | PHE A 589 | -12.477 | -22.800 | -4.981 | 1.00 | 0.00 | D | C |
| ATOM 18005 | C   | PHE A 589 | -9.125  | -20.665 | -6.265 | 1.00 | 0.00 | D | C |
| ATOM 18006 | O   | PHE A 589 | -9.020  | -21.124 | -5.129 | 1.00 | 0.00 | D | O |
| ATOM 18007 | N   | GLY A 590 | -8.469  | -21.197 | -7.312 | 1.00 | 0.00 | D | N |
| ATOM 18008 | CA  | GLY A 590 | -7.675  | -22.376 | -7.136 | 1.00 | 0.00 | D | C |
| ATOM 18009 | C   | GLY A 590 | -6.551  | -22.084 | -6.192 | 1.00 | 0.00 | D | C |
| ATOM 18010 | O   | GLY A 590 | -6.253  | -22.878 | -5.301 | 1.00 | 0.00 | D | O |
| ATOM 18011 | N   | PHE A 591 | -5.892  | -20.923 | -6.354 | 1.00 | 0.00 | D | N |
| ATOM 18012 | CA  | PHE A 591 | -4.782  | -20.610 | -5.505 | 1.00 | 0.00 | D | C |
| ATOM 18013 | CB  | PHE A 591 | -4.021  | -19.339 | -5.910 | 1.00 | 0.00 | D | C |
| ATOM 18014 | CG  | PHE A 591 | -3.068  | -19.734 | -6.985 | 1.00 | 0.00 | D | C |
| ATOM 18015 | CD1 | PHE A 591 | -3.484  | -19.951 | -8.279 | 1.00 | 0.00 | D | C |
| ATOM 18016 | CE1 | PHE A 591 | -2.582  | -20.309 | -9.253 | 1.00 | 0.00 | D | C |
| ATOM 18017 | CZ  | PHE A 591 | -1.250  | -20.448 | -8.944 | 1.00 | 0.00 | D | C |
| ATOM 18018 | CD2 | PHE A 591 | -1.731  | -19.870 | -6.687 | 1.00 | 0.00 | D | C |
| ATOM 18019 | CE2 | PHE A 591 | -0.824  | -20.225 | -7.657 | 1.00 | 0.00 | D | C |
| ATOM 18020 | C   | PHE A 591 | -5.249  | -20.471 | -4.095 | 1.00 | 0.00 | D | C |
| ATOM 18021 | O   | PHE A 591 | -4.566  | -20.895 | -3.164 | 1.00 | 0.00 | D | O |
| ATOM 18022 | N   | SER A 592 | -6.427  | -19.863 | -3.906 | 1.00 | 0.00 | D | N |
| ATOM 18023 | CA  | SER A 592 | -6.981  | -19.664 | -2.601 | 1.00 | 0.00 | D | C |
| ATOM 18024 | CB  | SER A 592 | -8.335  | -18.956 | -2.680 | 1.00 | 0.00 | D | C |
| ATOM 18025 | OG  | SER A 592 | -8.884  | -18.846 | -1.382 | 1.00 | 0.00 | D | O |
| ATOM 18026 | C   | SER A 592 | -7.207  | -20.995 | -1.951 | 1.00 | 0.00 | D | C |
| ATOM 18027 | O   | SER A 592 | -6.894  | -21.180 | -0.776 | 1.00 | 0.00 | D | O |
| ATOM 18028 | N   | THR A 593 | -7.752  | -21.966 | -2.705 | 1.00 | 0.00 | D | N |
| ATOM 18029 | CA  | THR A 593 | -8.033  | -23.248 | -2.128 | 1.00 | 0.00 | D | C |
| ATOM 18030 | CB  | THR A 593 | -8.718  | -24.197 | -3.066 | 1.00 | 0.00 | D | C |

|      |       |               |         |         |        |      |      |   |   |
|------|-------|---------------|---------|---------|--------|------|------|---|---|
| ATOM | 18031 | OG1 THR A 593 | -7.877  | -24.522 | -4.161 | 1.00 | 0.00 | D | O |
| ATOM | 18032 | CG2 THR A 593 | -10.000 | -23.519 | -3.560 | 1.00 | 0.00 | D | C |
| ATOM | 18033 | C THR A 593   | -6.741  | -23.875 | -1.724 | 1.00 | 0.00 | D | C |
| ATOM | 18034 | O THR A 593   | -6.650  | -24.494 | -0.667 | 1.00 | 0.00 | D | O |
| ATOM | 18035 | N ALA A 594   | -5.700  | -23.725 | -2.563 | 1.00 | 0.00 | D | N |
| ATOM | 18036 | CA ALA A 594  | -4.438  | -24.338 | -2.274 | 1.00 | 0.00 | D | C |
| ATOM | 18037 | CB ALA A 594  | -3.391  | -24.084 | -3.374 | 1.00 | 0.00 | D | C |
| ATOM | 18038 | C ALA A 594   | -3.898  | -23.774 | -0.996 | 1.00 | 0.00 | D | C |
| ATOM | 18039 | O ALA A 594   | -3.366  | -24.506 | -0.165 | 1.00 | 0.00 | D | O |
| ATOM | 18040 | N VAL A 595   | -4.016  | -22.446 | -0.804 | 1.00 | 0.00 | D | N |
| ATOM | 18041 | CA VAL A 595  | -3.489  | -21.818 | 0.374  | 1.00 | 0.00 | D | C |
| ATOM | 18042 | CB VAL A 595  | -3.590  | -20.316 | 0.354  | 1.00 | 0.00 | D | C |
| ATOM | 18043 | CG1 VAL A 595 | -3.057  | -19.779 | 1.694  | 1.00 | 0.00 | D | C |
| ATOM | 18044 | CG2 VAL A 595 | -2.840  | -19.779 | -0.877 | 1.00 | 0.00 | D | C |
| ATOM | 18045 | C VAL A 595   | -4.230  | -22.278 | 1.592  | 1.00 | 0.00 | D | C |
| ATOM | 18046 | O VAL A 595   | -3.628  | -22.519 | 2.636  | 1.00 | 0.00 | D | O |
| ATOM | 18047 | N VAL A 596   | -5.563  | -22.426 | 1.486  | 1.00 | 0.00 | D | N |
| ATOM | 18048 | CA VAL A 596  | -6.370  | -22.719 | 2.638  | 1.00 | 0.00 | D | C |
| ATOM | 18049 | CB VAL A 596  | -7.839  | -22.762 | 2.302  | 1.00 | 0.00 | D | C |
| ATOM | 18050 | CG1 VAL A 596 | -8.177  | -24.070 | 1.570  | 1.00 | 0.00 | D | C |
| ATOM | 18051 | CG2 VAL A 596 | -8.654  | -22.517 | 3.578  | 1.00 | 0.00 | D | C |
| ATOM | 18052 | C VAL A 596   | -5.932  | -24.018 | 3.248  | 1.00 | 0.00 | D | C |
| ATOM | 18053 | O VAL A 596   | -5.847  | -24.141 | 4.468  | 1.00 | 0.00 | D | O |
| ATOM | 18054 | N THR A 597   | -5.657  | -25.033 | 2.413  | 1.00 | 0.00 | D | N |
| ATOM | 18055 | CA THR A 597  | -5.232  | -26.315 | 2.898  | 1.00 | 0.00 | D | C |
| ATOM | 18056 | CB THR A 597  | -5.239  | -27.361 | 1.825  | 1.00 | 0.00 | D | C |
| ATOM | 18057 | OG1 THR A 597 | -4.839  | -28.604 | 2.369  | 1.00 | 0.00 | D | O |
| ATOM | 18058 | CG2 THR A 597 | -4.278  | -26.942 | 0.702  | 1.00 | 0.00 | D | C |
| ATOM | 18059 | C THR A 597   | -3.836  | -26.271 | 3.463  | 1.00 | 0.00 | D | C |
| ATOM | 18060 | O THR A 597   | -3.549  | -26.916 | 4.471  | 1.00 | 0.00 | D | O |
| ATOM | 18061 | N LEU A 598   | -2.931  | -25.494 | 2.836  | 1.00 | 0.00 | D | N |
| ATOM | 18062 | CA LEU A 598  | -1.528  | -25.537 | 3.157  | 1.00 | 0.00 | D | C |
| ATOM | 18063 | CB LEU A 598  | -0.718  | -24.543 | 2.304  | 1.00 | 0.00 | D | C |
| ATOM | 18064 | CG LEU A 598  | 0.809   | -24.678 | 2.448  | 1.00 | 0.00 | D | C |
| ATOM | 18065 | CD1 LEU A 598 | 1.333   | -25.910 | 1.695  | 1.00 | 0.00 | D | C |
| ATOM | 18066 | CD2 LEU A 598 | 1.534   | -23.388 | 2.050  | 1.00 | 0.00 | D | C |
| ATOM | 18067 | C LEU A 598   | -1.284  | -25.168 | 4.583  | 1.00 | 0.00 | D | C |
| ATOM | 18068 | O LEU A 598   | -0.551  | -25.858 | 5.293  | 1.00 | 0.00 | D | O |



|            |     |           |        |         |        |      |      |   |   |
|------------|-----|-----------|--------|---------|--------|------|------|---|---|
| ATOM 18069 | N   | ILE A 599 | -1.864 | -24.044 | 5.037  | 1.00 | 0.00 | D | N |
| ATOM 18070 | CA  | ILE A 599 | -1.669 | -23.676 | 6.399  | 1.00 | 0.00 | D | C |
| ATOM 18071 | CB  | ILE A 599 | -0.278 | -23.211 | 6.634  | 1.00 | 0.00 | D | C |
| ATOM 18072 | CG2 | ILE A 599 | 0.120  | -22.192 | 5.558  | 1.00 | 0.00 | D | C |
| ATOM 18073 | CG1 | ILE A 599 | -0.129 | -22.784 | 8.081  | 1.00 | 0.00 | D | C |
| ATOM 18074 | CD  | ILE A 599 | 1.327  | -22.640 | 8.441  | 1.00 | 0.00 | D | C |
| ATOM 18075 | C   | ILE A 599 | -2.672 | -22.628 | 6.776  | 1.00 | 0.00 | D | C |
| ATOM 18076 | O   | ILE A 599 | -2.779 | -21.594 | 6.122  | 1.00 | 0.00 | D | O |
| ATOM 18077 | N   | GLU A 600 | -3.431 | -22.871 | 7.863  | 1.00 | 0.00 | D | N |
| ATOM 18078 | CA  | GLU A 600 | -4.462 | -21.958 | 8.266  | 1.00 | 0.00 | D | C |
| ATOM 18079 | CB  | GLU A 600 | -5.319 | -22.498 | 9.429  | 1.00 | 0.00 | D | C |
| ATOM 18080 | CG  | GLU A 600 | -4.538 | -22.893 | 10.683 | 1.00 | 0.00 | D | C |
| ATOM 18081 | CD  | GLU A 600 | -4.399 | -21.688 | 11.600 | 1.00 | 0.00 | D | C |
| ATOM 18082 | OE1 | GLU A 600 | -5.449 | -21.124 | 12.008 | 1.00 | 0.00 | D | O |
| ATOM 18083 | OE2 | GLU A 600 | -3.235 | -21.328 | 11.915 | 1.00 | 0.00 | D | O |
| ATOM 18084 | C   | GLU A 600 | -3.846 | -20.652 | 8.652  | 1.00 | 0.00 | D | C |
| ATOM 18085 | O   | GLU A 600 | -4.327 | -19.597 | 8.238  | 1.00 | 0.00 | D | O |
| ATOM 18086 | N   | ASP A 601 | -2.740 | -20.692 | 9.420  | 1.00 | 0.00 | D | N |
| ATOM 18087 | CA  | ASP A 601 | -2.072 | -19.486 | 9.817  | 1.00 | 0.00 | D | C |
| ATOM 18088 | CB  | ASP A 601 | -1.489 | -18.710 | 8.632  | 1.00 | 0.00 | D | C |
| ATOM 18089 | CG  | ASP A 601 | -0.444 | -19.587 | 7.984  | 1.00 | 0.00 | D | C |
| ATOM 18090 | OD1 | ASP A 601 | 0.483  | -20.043 | 8.704  | 1.00 | 0.00 | D | O |
| ATOM 18091 | OD2 | ASP A 601 | -0.573 | -19.831 | 6.753  | 1.00 | 0.00 | D | O |
| ATOM 18092 | C   | ASP A 601 | -3.063 | -18.572 | 10.436 | 1.00 | 0.00 | D | C |
| ATOM 18093 | O   | ASP A 601 | -3.909 | -18.979 | 11.234 | 1.00 | 0.00 | D | O |
| ATOM 18094 | N   | GLY A 602 | -2.951 | -17.272 | 10.099 | 1.00 | 0.00 | D | N |
| ATOM 18095 | CA  | GLY A 602 | -3.916 | -16.354 | 10.608 | 1.00 | 0.00 | D | C |
| ATOM 18096 | C   | GLY A 602 | -4.339 | -15.471 | 9.480  | 1.00 | 0.00 | D | C |
| ATOM 18097 | O   | GLY A 602 | -3.487 | -14.976 | 8.745  | 1.00 | 0.00 | D | O |
| ATOM 18098 | N   | LYS A 603 | -5.676 | -15.283 | 9.336  | 1.00 | 0.00 | D | N |
| ATOM 18099 | CA  | LYS A 603 | -6.323 | -14.386 | 8.401  | 1.00 | 0.00 | D | C |
| ATOM 18100 | CB  | LYS A 603 | -5.442 | -13.832 | 7.275  | 1.00 | 0.00 | D | C |
| ATOM 18101 | CG  | LYS A 603 | -6.051 | -12.668 | 6.506  | 1.00 | 0.00 | D | C |
| ATOM 18102 | CD  | LYS A 603 | -4.948 | -11.922 | 5.775  | 1.00 | 0.00 | D | C |
| ATOM 18103 | CE  | LYS A 603 | -3.713 | -11.771 | 6.668  | 1.00 | 0.00 | D | C |
| ATOM 18104 | NZ  | LYS A 603 | -2.598 | -11.168 | 5.913  | 1.00 | 0.00 | D | N |
| ATOM 18105 | C   | LYS A 603 | -7.506 | -15.019 | 7.691  | 1.00 | 0.00 | D | C |
| ATOM 18106 | O   | LYS A 603 | -7.428 | -15.065 | 6.430  | 1.00 | 0.00 | D | O |

|            |     |           |         |         |        |      |      |   |   |
|------------|-----|-----------|---------|---------|--------|------|------|---|---|
| ATOM 18107 | N   | TYR B 628 | -5.312  | -16.717 | 6.946  | 1.00 | 0.00 | D | N |
| ATOM 18108 | CA  | TYR B 628 | -5.858  | -17.461 | 5.796  | 1.00 | 0.00 | D | C |
| ATOM 18109 | CB  | TYR B 628 | -4.707  | -18.087 | 5.006  | 1.00 | 0.00 | D | C |
| ATOM 18110 | CG  | TYR B 628 | -3.937  | -16.991 | 4.365  | 1.00 | 0.00 | D | C |
| ATOM 18111 | CD1 | TYR B 628 | -3.033  | -16.245 | 5.087  | 1.00 | 0.00 | D | C |
| ATOM 18112 | CE1 | TYR B 628 | -2.320  | -15.239 | 4.481  | 1.00 | 0.00 | D | C |
| ATOM 18113 | CZ  | TYR B 628 | -2.506  | -14.975 | 3.145  | 1.00 | 0.00 | D | C |
| ATOM 18114 | OH  | TYR B 628 | -1.772  | -13.942 | 2.522  | 1.00 | 0.00 | D | O |
| ATOM 18115 | CD2 | TYR B 628 | -4.116  | -16.720 | 3.031  | 1.00 | 0.00 | D | C |
| ATOM 18116 | CE2 | TYR B 628 | -3.406  | -15.716 | 2.420  | 1.00 | 0.00 | D | C |
| ATOM 18117 | C   | TYR B 628 | -6.796  | -18.569 | 6.158  | 1.00 | 0.00 | D | C |
| ATOM 18118 | O   | TYR B 628 | -7.069  | -19.449 | 5.343  | 1.00 | 0.00 | D | O |
| ATOM 18119 | N   | ASN B 629 | -7.329  | -18.550 | 7.391  | 1.00 | 0.00 | D | N |
| ATOM 18120 | CA  | ASN B 629 | -8.203  | -19.596 | 7.829  | 1.00 | 0.00 | D | C |
| ATOM 18121 | CB  | ASN B 629 | -8.663  | -19.407 | 9.282  | 1.00 | 0.00 | D | C |
| ATOM 18122 | CG  | ASN B 629 | -7.437  | -19.477 | 10.174 | 1.00 | 0.00 | D | C |
| ATOM 18123 | OD1 | ASN B 629 | -6.355  | -19.868 | 9.740  | 1.00 | 0.00 | D | O |
| ATOM 18124 | ND2 | ASN B 629 | -7.612  | -19.087 | 11.465 | 1.00 | 0.00 | D | N |
| ATOM 18125 | C   | ASN B 629 | -9.438  | -19.601 | 6.978  | 1.00 | 0.00 | D | C |
| ATOM 18126 | O   | ASN B 629 | -9.917  | -20.662 | 6.581  | 1.00 | 0.00 | D | O |
| ATOM 18127 | N   | SER B 630 | -9.979  | -18.408 | 6.664  | 1.00 | 0.00 | D | N |
| ATOM 18128 | CA  | SER B 630 | -11.212 | -18.340 | 5.925  | 1.00 | 0.00 | D | C |
| ATOM 18129 | CB  | SER B 630 | -12.143 | -17.200 | 6.378  | 1.00 | 0.00 | D | C |
| ATOM 18130 | OG  | SER B 630 | -13.329 | -17.193 | 5.595  | 1.00 | 0.00 | D | O |
| ATOM 18131 | C   | SER B 630 | -10.929 | -18.115 | 4.476  | 1.00 | 0.00 | D | C |
| ATOM 18132 | O   | SER B 630 | -9.949  | -17.480 | 4.103  | 1.00 | 0.00 | D | O |
| ATOM 18133 | N   | LEU B 631 | -11.795 | -18.703 | 3.623  | 1.00 | 0.00 | D | N |
| ATOM 18134 | CA  | LEU B 631 | -11.726 | -18.576 | 2.195  | 1.00 | 0.00 | D | C |
| ATOM 18135 | CB  | LEU B 631 | -12.725 | -19.504 | 1.486  | 1.00 | 0.00 | D | C |
| ATOM 18136 | CG  | LEU B 631 | -12.673 | -19.415 | -0.048 | 1.00 | 0.00 | D | C |
| ATOM 18137 | CD1 | LEU B 631 | -11.324 | -19.916 | -0.584 | 1.00 | 0.00 | D | C |
| ATOM 18138 | CD2 | LEU B 631 | -13.865 | -20.138 | -0.695 | 1.00 | 0.00 | D | C |
| ATOM 18139 | C   | LEU B 631 | -12.064 | -17.165 | 1.808  | 1.00 | 0.00 | D | C |
| ATOM 18140 | O   | LEU B 631 | -11.409 | -16.570 | 0.953  | 1.00 | 0.00 | D | O |
| ATOM 18141 | N   | TYR B 632 | -13.102 | -16.583 | 2.443  | 1.00 | 0.00 | D | N |
| ATOM 18142 | CA  | TYR B 632 | -13.526 | -15.256 | 2.097  | 1.00 | 0.00 | D | C |
| ATOM 18143 | CB  | TYR B 632 | -14.753 | -14.792 | 2.903  | 1.00 | 0.00 | D | C |
| ATOM 18144 | CG  | TYR B 632 | -14.958 | -13.338 | 2.637  | 1.00 | 0.00 | D | C |

|      |       |               |         |         |        |      |      |   |   |
|------|-------|---------------|---------|---------|--------|------|------|---|---|
| ATOM | 18145 | CD1 TYR B 632 | -15.505 | -12.906 | 1.453  | 1.00 | 0.00 | D | C |
| ATOM | 18146 | CE1 TYR B 632 | -15.696 | -11.564 | 1.216  | 1.00 | 0.00 | D | C |
| ATOM | 18147 | CZ TYR B 632  | -15.340 | -10.639 | 2.169  | 1.00 | 0.00 | D | C |
| ATOM | 18148 | OH TYR B 632  | -15.534 | -9.263  | 1.931  | 1.00 | 0.00 | D | O |
| ATOM | 18149 | CD2 TYR B 632 | -14.607 | -12.405 | 3.586  | 1.00 | 0.00 | D | C |
| ATOM | 18150 | CE2 TYR B 632 | -14.795 | -11.061 | 3.356  | 1.00 | 0.00 | D | C |
| ATOM | 18151 | C TYR B 632   | -12.411 | -14.302 | 2.374  | 1.00 | 0.00 | D | C |
| ATOM | 18152 | O TYR B 632   | -12.119 | -13.428 | 1.559  | 1.00 | 0.00 | D | O |
| ATOM | 18153 | N SER B 633   | -11.767 | -14.433 | 3.546  | 1.00 | 0.00 | D | N |
| ATOM | 18154 | CA SER B 633  | -10.686 | -13.562 | 3.910  | 1.00 | 0.00 | D | C |
| ATOM | 18155 | CB SER B 633  | -10.264 | -13.744 | 5.377  | 1.00 | 0.00 | D | C |
| ATOM | 18156 | OG SER B 633  | -9.864  | -15.085 | 5.597  | 1.00 | 0.00 | D | O |
| ATOM | 18157 | C SER B 633   | -9.486  | -13.821 | 3.044  | 1.00 | 0.00 | D | C |
| ATOM | 18158 | O SER B 633   | -8.851  | -12.885 | 2.560  | 1.00 | 0.00 | D | O |
| ATOM | 18159 | N THR B 634   | -9.148  | -15.105 | 2.810  | 1.00 | 0.00 | D | N |
| ATOM | 18160 | CA THR B 634  | -7.980  | -15.435 | 2.040  | 1.00 | 0.00 | D | C |
| ATOM | 18161 | CB THR B 634  | -7.721  | -16.910 | 1.902  | 1.00 | 0.00 | D | C |
| ATOM | 18162 | OG1 THR B 634 | -8.857  | -17.565 | 1.358  | 1.00 | 0.00 | D | O |
| ATOM | 18163 | CG2 THR B 634 | -7.343  | -17.505 | 3.261  | 1.00 | 0.00 | D | C |
| ATOM | 18164 | C THR B 634   | -8.130  | -14.909 | 0.653  | 1.00 | 0.00 | D | C |
| ATOM | 18165 | O THR B 634   | -7.172  | -14.412 | 0.065  | 1.00 | 0.00 | D | O |
| ATOM | 18166 | N CYS B 635   | -9.344  | -15.018 | 0.081  | 1.00 | 0.00 | D | N |
| ATOM | 18167 | CA CYS B 635  | -9.550  | -14.560 | -1.260 | 1.00 | 0.00 | D | C |
| ATOM | 18168 | CB CYS B 635  | -10.992 | -14.778 | -1.753 | 1.00 | 0.00 | D | C |
| ATOM | 18169 | SG CYS B 635  | -11.249 | -14.193 | -3.456 | 1.00 | 0.00 | D | S |
| ATOM | 18170 | C CYS B 635   | -9.279  | -13.093 | -1.290 | 1.00 | 0.00 | D | C |
| ATOM | 18171 | O CYS B 635   | -8.627  | -12.589 | -2.204 | 1.00 | 0.00 | D | O |
| ATOM | 18172 | N LEU B 636   | -9.762  | -12.364 | -0.265 | 1.00 | 0.00 | D | N |
| ATOM | 18173 | CA LEU B 636  | -9.557  | -10.946 | -0.226 | 1.00 | 0.00 | D | C |
| ATOM | 18174 | CB LEU B 636  | -10.242 | -10.254 | 0.963  | 1.00 | 0.00 | D | C |
| ATOM | 18175 | CG LEU B 636  | -11.776 | -10.257 | 0.863  | 1.00 | 0.00 | D | C |
| ATOM | 18176 | CD1 LEU B 636 | -12.412 | -9.503  | 2.041  | 1.00 | 0.00 | D | C |
| ATOM | 18177 | CD2 LEU B 636 | -12.245 | -9.738  | -0.508 | 1.00 | 0.00 | D | C |
| ATOM | 18178 | C LEU B 636   | -8.092  | -10.691 | -0.122 | 1.00 | 0.00 | D | C |
| ATOM | 18179 | O LEU B 636   | -7.571  | -9.758  | -0.732 | 1.00 | 0.00 | D | O |
| ATOM | 18180 | N GLU B 637   | -7.383  | -11.519 | 0.663  | 1.00 | 0.00 | D | N |
| ATOM | 18181 | CA GLU B 637  | -5.979  | -11.320 | 0.840  | 1.00 | 0.00 | D | C |
| ATOM | 18182 | CB GLU B 637  | -5.378  | -12.326 | 1.837  | 1.00 | 0.00 | D | C |

|      |       |     |           |        |         |        |      |      |   |   |
|------|-------|-----|-----------|--------|---------|--------|------|------|---|---|
| ATOM | 18183 | CG  | GLU B 637 | -4.213 | -11.767 | 2.659  | 1.00 | 0.00 | D | C |
| ATOM | 18184 | CD  | GLU B 637 | -3.195 | -11.137 | 1.726  | 1.00 | 0.00 | D | C |
| ATOM | 18185 | OE1 | GLU B 637 | -2.669 | -11.867 | 0.844  | 1.00 | 0.00 | D | O |
| ATOM | 18186 | OE2 | GLU B 637 | -2.933 | -9.917  | 1.885  | 1.00 | 0.00 | D | O |
| ATOM | 18187 | C   | GLU B 637 | -5.317 | -11.520 | -0.495 | 1.00 | 0.00 | D | C |
| ATOM | 18188 | O   | GLU B 637 | -4.412 | -10.774 | -0.863 | 1.00 | 0.00 | D | O |
| ATOM | 18189 | N   | LEU B 638 | -5.758 | -12.546 | -1.253 | 1.00 | 0.00 | D | N |
| ATOM | 18190 | CA  | LEU B 638 | -5.202 | -12.873 | -2.543 | 1.00 | 0.00 | D | C |
| ATOM | 18191 | CB  | LEU B 638 | -5.767 | -14.171 | -3.146 | 1.00 | 0.00 | D | C |
| ATOM | 18192 | CG  | LEU B 638 | -5.384 | -15.448 | -2.380 | 1.00 | 0.00 | D | C |
| ATOM | 18193 | CD1 | LEU B 638 | -5.899 | -16.699 | -3.110 | 1.00 | 0.00 | D | C |
| ATOM | 18194 | CD2 | LEU B 638 | -3.873 | -15.498 | -2.098 | 1.00 | 0.00 | D | C |
| ATOM | 18195 | C   | LEU B 638 | -5.487 | -11.794 | -3.541 | 1.00 | 0.00 | D | C |
| ATOM | 18196 | O   | LEU B 638 | -4.625 | -11.440 | -4.343 | 1.00 | 0.00 | D | O |
| ATOM | 18197 | N   | PHE B 639 | -6.713 | -11.246 | -3.514 | 1.00 | 0.00 | D | N |
| ATOM | 18198 | CA  | PHE B 639 | -7.136 | -10.247 | -4.455 | 1.00 | 0.00 | D | C |
| ATOM | 18199 | CB  | PHE B 639 | -8.598 | -9.818  | -4.241 | 1.00 | 0.00 | D | C |
| ATOM | 18200 | CG  | PHE B 639 | -8.938 | -8.794  | -5.267 | 1.00 | 0.00 | D | C |
| ATOM | 18201 | CD1 | PHE B 639 | -9.342 | -9.182  | -6.524 | 1.00 | 0.00 | D | C |
| ATOM | 18202 | CE1 | PHE B 639 | -9.656 | -8.249  | -7.483 | 1.00 | 0.00 | D | C |
| ATOM | 18203 | CZ  | PHE B 639 | -9.569 | -6.910  | -7.197 | 1.00 | 0.00 | D | C |
| ATOM | 18204 | CD2 | PHE B 639 | -8.845 | -7.451  | -4.989 | 1.00 | 0.00 | D | C |
| ATOM | 18205 | CE2 | PHE B 639 | -9.161 | -6.515  | -5.947 | 1.00 | 0.00 | D | C |
| ATOM | 18206 | C   | PHE B 639 | -6.261 | -9.051  | -4.276 | 1.00 | 0.00 | D | C |
| ATOM | 18207 | O   | PHE B 639 | -5.899 | -8.382  | -5.243 | 1.00 | 0.00 | D | O |
| ATOM | 18208 | N   | LYS B 640 | -5.890 | -8.758  | -3.016 | 1.00 | 0.00 | D | N |
| ATOM | 18209 | CA  | LYS B 640 | -5.071 | -7.618  | -2.717 | 1.00 | 0.00 | D | C |
| ATOM | 18210 | CB  | LYS B 640 | -4.627 | -7.579  | -1.244 | 1.00 | 0.00 | D | C |
| ATOM | 18211 | CG  | LYS B 640 | -5.763 | -7.494  | -0.224 | 1.00 | 0.00 | D | C |
| ATOM | 18212 | CD  | LYS B 640 | -5.300 | -7.836  | 1.194  | 1.00 | 0.00 | D | C |
| ATOM | 18213 | CE  | LYS B 640 | -6.401 | -7.766  | 2.252  | 1.00 | 0.00 | D | C |
| ATOM | 18214 | NZ  | LYS B 640 | -5.874 | -8.248  | 3.549  | 1.00 | 0.00 | D | N |
| ATOM | 18215 | C   | LYS B 640 | -3.809 | -7.771  | -3.495 | 1.00 | 0.00 | D | C |
| ATOM | 18216 | O   | LYS B 640 | -3.303 | -6.813  | -4.078 | 1.00 | 0.00 | D | O |
| ATOM | 18217 | N   | PHE B 641 | -3.264 | -8.999  | -3.517 | 1.00 | 0.00 | D | N |
| ATOM | 18218 | CA  | PHE B 641 | -2.039 | -9.258  | -4.215 | 1.00 | 0.00 | D | C |
| ATOM | 18219 | CB  | PHE B 641 | -1.485 | -10.677 | -3.993 | 1.00 | 0.00 | D | C |
| ATOM | 18220 | CG  | PHE B 641 | -0.672 | -10.625 | -2.749 | 1.00 | 0.00 | D | C |

|      |       |     |     |       |        |         |        |      |      |   |   |
|------|-------|-----|-----|-------|--------|---------|--------|------|------|---|---|
| ATOM | 18221 | CD1 | PHE | B 641 | 0.667  | -10.315 | -2.826 | 1.00 | 0.00 | D | C |
| ATOM | 18222 | CE1 | PHE | B 641 | 1.441  | -10.257 | -1.696 | 1.00 | 0.00 | D | C |
| ATOM | 18223 | CZ  | PHE | B 641 | 0.884  | -10.505 | -0.467 | 1.00 | 0.00 | D | C |
| ATOM | 18224 | CD2 | PHE | B 641 | -1.229 | -10.868 | -1.516 | 1.00 | 0.00 | D | C |
| ATOM | 18225 | CE2 | PHE | B 641 | -0.452 | -10.810 | -0.381 | 1.00 | 0.00 | D | C |
| ATOM | 18226 | C   | PHE | B 641 | -2.200 | -9.040  | -5.687 | 1.00 | 0.00 | D | C |
| ATOM | 18227 | O   | PHE | B 641 | -1.305 | -8.494  | -6.333 | 1.00 | 0.00 | D | O |
| ATOM | 18228 | N   | THR | B 642 | -3.336 | -9.465  | -6.268 | 1.00 | 0.00 | D | N |
| ATOM | 18229 | CA  | THR | B 642 | -3.527 | -9.336  | -7.687 | 1.00 | 0.00 | D | C |
| ATOM | 18230 | CB  | THR | B 642 | -4.769 | -10.020 | -8.167 | 1.00 | 0.00 | D | C |
| ATOM | 18231 | OG1 | THR | B 642 | -5.936 | -9.383  | -7.674 | 1.00 | 0.00 | D | O |
| ATOM | 18232 | CG2 | THR | B 642 | -4.708 | -11.454 | -7.627 | 1.00 | 0.00 | D | C |
| ATOM | 18233 | C   | THR | B 642 | -3.577 | -7.885  | -8.055 | 1.00 | 0.00 | D | C |
| ATOM | 18234 | O   | THR | B 642 | -3.079 | -7.478  | -9.103 | 1.00 | 0.00 | D | O |
| ATOM | 18235 | N   | ILE | B 643 | -4.173 | -7.067  | -7.170 | 1.00 | 0.00 | D | N |
| ATOM | 18236 | CA  | ILE | B 643 | -4.304 | -5.648  | -7.335 | 1.00 | 0.00 | D | C |
| ATOM | 18237 | CB  | ILE | B 643 | -4.952 | -4.993  | -6.145 | 1.00 | 0.00 | D | C |
| ATOM | 18238 | CG2 | ILE | B 643 | -4.946 | -3.473  | -6.375 | 1.00 | 0.00 | D | C |
| ATOM | 18239 | CG1 | ILE | B 643 | -6.358 | -5.565  | -5.903 | 1.00 | 0.00 | D | C |
| ATOM | 18240 | CD  | ILE | B 643 | -6.941 | -5.182  | -4.541 | 1.00 | 0.00 | D | C |
| ATOM | 18241 | C   | ILE | B 643 | -2.917 | -5.094  | -7.429 | 1.00 | 0.00 | D | C |
| ATOM | 18242 | O   | ILE | B 643 | -2.678 | -4.104  | -8.119 | 1.00 | 0.00 | D | O |
| ATOM | 18243 | N   | GLY | B 644 | -1.960 | -5.715  | -6.710 | 1.00 | 0.00 | D | N |
| ATOM | 18244 | CA  | GLY | B 644 | -0.605 | -5.249  | -6.755 | 1.00 | 0.00 | D | C |
| ATOM | 18245 | C   | GLY | B 644 | -0.221 | -4.651  | -5.441 | 1.00 | 0.00 | D | C |
| ATOM | 18246 | O   | GLY | B 644 | 0.914  | -4.211  | -5.266 | 1.00 | 0.00 | D | O |
| ATOM | 18247 | N   | MET | B 645 | -1.158 | -4.596  | -4.479 | 1.00 | 0.00 | D | N |
| ATOM | 18248 | CA  | MET | B 645 | -0.787 | -4.078  | -3.197 | 1.00 | 0.00 | D | C |
| ATOM | 18249 | CB  | MET | B 645 | -1.794 | -3.047  | -2.658 | 1.00 | 0.00 | D | C |
| ATOM | 18250 | CG  | MET | B 645 | -3.225 | -3.581  | -2.582 | 1.00 | 0.00 | D | C |
| ATOM | 18251 | SD  | MET | B 645 | -4.450 | -2.355  | -2.036 | 1.00 | 0.00 | D | S |
| ATOM | 18252 | CE  | MET | B 645 | -4.282 | -1.330  | -3.525 | 1.00 | 0.00 | D | C |
| ATOM | 18253 | C   | MET | B 645 | -0.730 | -5.233  | -2.250 | 1.00 | 0.00 | D | C |
| ATOM | 18254 | O   | MET | B 645 | -1.697 | -5.980  | -2.110 | 1.00 | 0.00 | D | O |
| ATOM | 18255 | N   | GLY | B 646 | 0.424  | -5.419  | -1.577 | 1.00 | 0.00 | D | N |
| ATOM | 18256 | CA  | GLY | B 646 | 0.526  | -6.522  | -0.663 | 1.00 | 0.00 | D | C |
| ATOM | 18257 | C   | GLY | B 646 | 1.775  | -6.385  | 0.150  | 1.00 | 0.00 | D | C |
| ATOM | 18258 | O   | GLY | B 646 | 2.702  | -5.659  | -0.207 | 1.00 | 0.00 | D | O |

|      |       |     |           |       |         |        |      |      |   |   |
|------|-------|-----|-----------|-------|---------|--------|------|------|---|---|
| ATOM | 18259 | N   | ASP B 647 | 1.808 | -7.094  | 1.296  | 1.00 | 0.00 | D | N |
| ATOM | 18260 | CA  | ASP B 647 | 2.958 | -7.121  | 2.156  | 1.00 | 0.00 | D | C |
| ATOM | 18261 | CB  | ASP B 647 | 2.611 | -6.957  | 3.642  | 1.00 | 0.00 | D | C |
| ATOM | 18262 | CG  | ASP B 647 | 2.006 | -5.589  | 3.900  | 1.00 | 0.00 | D | C |
| ATOM | 18263 | OD1 | ASP B 647 | 2.250 | -4.658  | 3.087  | 1.00 | 0.00 | D | O |
| ATOM | 18264 | OD2 | ASP B 647 | 1.278 | -5.463  | 4.923  | 1.00 | 0.00 | D | O |
| ATOM | 18265 | C   | ASP B 647 | 3.522 | -8.496  | 1.989  | 1.00 | 0.00 | D | C |
| ATOM | 18266 | O   | ASP B 647 | 2.798 | -9.484  | 2.102  | 1.00 | 0.00 | D | O |
| ATOM | 18267 | N   | LEU B 648 | 4.839 | -8.614  | 1.725  | 1.00 | 0.00 | D | N |
| ATOM | 18268 | CA  | LEU B 648 | 5.339 | -9.920  | 1.401  | 1.00 | 0.00 | D | C |
| ATOM | 18269 | CB  | LEU B 648 | 6.153 | -9.979  | 0.093  | 1.00 | 0.00 | D | C |
| ATOM | 18270 | CG  | LEU B 648 | 5.337 | -9.767  | -1.194 | 1.00 | 0.00 | D | C |
| ATOM | 18271 | CD1 | LEU B 648 | 4.302 | -10.884 | -1.378 | 1.00 | 0.00 | D | C |
| ATOM | 18272 | CD2 | LEU B 648 | 4.731 | -8.358  | -1.268 | 1.00 | 0.00 | D | C |
| ATOM | 18273 | C   | LEU B 648 | 6.229 | -10.494 | 2.458  | 1.00 | 0.00 | D | C |
| ATOM | 18274 | O   | LEU B 648 | 6.848 | -9.795  | 3.258  | 1.00 | 0.00 | D | O |
| ATOM | 18275 | N   | GLU B 649 | 6.269 | -11.842 | 2.459  | 1.00 | 0.00 | D | N |
| ATOM | 18276 | CA  | GLU B 649 | 7.139 | -12.679 | 3.233  | 1.00 | 0.00 | D | C |
| ATOM | 18277 | CB  | GLU B 649 | 8.613 | -12.572 | 2.803  | 1.00 | 0.00 | D | C |
| ATOM | 18278 | CG  | GLU B 649 | 8.884 | -13.085 | 1.389  | 1.00 | 0.00 | D | C |
| ATOM | 18279 | CD  | GLU B 649 | 8.694 | -14.592 | 1.399  | 1.00 | 0.00 | D | C |
| ATOM | 18280 | OE1 | GLU B 649 | 7.525 | -15.038 | 1.237  | 1.00 | 0.00 | D | O |
| ATOM | 18281 | OE2 | GLU B 649 | 9.710 | -15.314 | 1.574  | 1.00 | 0.00 | D | O |
| ATOM | 18282 | C   | GLU B 649 | 7.095 | -12.390 | 4.701  | 1.00 | 0.00 | D | C |
| ATOM | 18283 | O   | GLU B 649 | 8.144 | -12.391 | 5.342  | 1.00 | 0.00 | D | O |
| ATOM | 18284 | N   | PHE B 650 | 5.906 | -12.160 | 5.294  | 1.00 | 0.00 | D | N |
| ATOM | 18285 | CA  | PHE B 650 | 5.921 | -11.982 | 6.724  | 1.00 | 0.00 | D | C |
| ATOM | 18286 | CB  | PHE B 650 | 4.544 | -11.812 | 7.384  | 1.00 | 0.00 | D | C |
| ATOM | 18287 | CG  | PHE B 650 | 3.981 | -10.476 | 7.075  | 1.00 | 0.00 | D | C |
| ATOM | 18288 | CD1 | PHE B 650 | 3.219 | -10.301 | 5.949  | 1.00 | 0.00 | D | C |
| ATOM | 18289 | CE1 | PHE B 650 | 2.690 | -9.071  | 5.668  | 1.00 | 0.00 | D | C |
| ATOM | 18290 | CZ  | PHE B 650 | 2.914 | -8.002  | 6.502  | 1.00 | 0.00 | D | C |
| ATOM | 18291 | CD2 | PHE B 650 | 4.205 | -9.408  | 7.914  | 1.00 | 0.00 | D | C |
| ATOM | 18292 | CE2 | PHE B 650 | 3.678 | -8.172  | 7.630  | 1.00 | 0.00 | D | C |
| ATOM | 18293 | C   | PHE B 650 | 6.430 | -13.265 | 7.296  | 1.00 | 0.00 | D | C |
| ATOM | 18294 | O   | PHE B 650 | 7.326 | -13.284 | 8.137  | 1.00 | 0.00 | D | O |
| ATOM | 18295 | N   | THR B 651 | 5.834 | -14.379 | 6.836  | 1.00 | 0.00 | D | N |
| ATOM | 18296 | CA  | THR B 651 | 6.250 | -15.700 | 7.205  | 1.00 | 0.00 | D | C |

|            |               |       |         |        |      |      |   |   |
|------------|---------------|-------|---------|--------|------|------|---|---|
| ATOM 18297 | CB THR B 651  | 7.742 | -15.833 | 7.125  | 1.00 | 0.00 | D | C |
| ATOM 18298 | OG1 THR B 651 | 8.186 | -15.565 | 5.806  | 1.00 | 0.00 | D | O |
| ATOM 18299 | CG2 THR B 651 | 8.170 | -17.241 | 7.579  | 1.00 | 0.00 | D | C |
| ATOM 18300 | C THR B 651   | 5.882 | -16.020 | 8.618  | 1.00 | 0.00 | D | C |
| ATOM 18301 | O THR B 651   | 5.806 | -17.196 | 8.968  | 1.00 | 0.00 | D | O |
| ATOM 18302 | N GLU B 652   | 5.482 | -15.026 | 9.423  | 1.00 | 0.00 | D | N |
| ATOM 18303 | CA GLU B 652  | 5.291 | -15.324 | 10.813 | 1.00 | 0.00 | D | C |
| ATOM 18304 | CB GLU B 652  | 4.897 | -14.095 | 11.628 | 1.00 | 0.00 | D | C |
| ATOM 18305 | CG GLU B 652  | 5.924 | -12.978 | 11.501 | 1.00 | 0.00 | D | C |
| ATOM 18306 | CD GLU B 652  | 5.422 | -11.841 | 12.357 | 1.00 | 0.00 | D | C |
| ATOM 18307 | OE1 GLU B 652 | 5.721 | -11.880 | 13.578 | 1.00 | 0.00 | D | O |
| ATOM 18308 | OE2 GLU B 652 | 4.730 | -10.934 | 11.821 | 1.00 | 0.00 | D | O |
| ATOM 18309 | C GLU B 652   | 4.209 | -16.338 | 10.985 | 1.00 | 0.00 | D | C |
| ATOM 18310 | O GLU B 652   | 3.126 | -16.216 | 10.415 | 1.00 | 0.00 | D | O |
| ATOM 18311 | N ASN B 653   | 4.494 | -17.363 | 11.815 | 1.00 | 0.00 | D | N |
| ATOM 18312 | CA ASN B 653  | 3.573 | -18.432 | 12.084 | 1.00 | 0.00 | D | C |
| ATOM 18313 | CB ASN B 653  | 2.231 | -17.912 | 12.597 | 1.00 | 0.00 | D | C |
| ATOM 18314 | CG ASN B 653  | 2.558 | -17.033 | 13.780 | 1.00 | 0.00 | D | C |
| ATOM 18315 | OD1 ASN B 653 | 2.813 | -17.506 | 14.882 | 1.00 | 0.00 | D | O |
| ATOM 18316 | ND2 ASN B 653 | 2.584 | -15.697 | 13.522 | 1.00 | 0.00 | D | N |
| ATOM 18317 | C ASN B 653   | 3.274 | -19.178 | 10.821 | 1.00 | 0.00 | D | C |
| ATOM 18318 | O ASN B 653   | 2.139 | -19.606 | 10.609 | 1.00 | 0.00 | D | O |
| ATOM 18319 | N TYR B 654   | 4.282 | -19.383 | 9.953  | 1.00 | 0.00 | D | N |
| ATOM 18320 | CA TYR B 654  | 4.004 | -20.079 | 8.726  | 1.00 | 0.00 | D | C |
| ATOM 18321 | CB TYR B 654  | 4.309 | -19.275 | 7.444  | 1.00 | 0.00 | D | C |
| ATOM 18322 | CG TYR B 654  | 3.223 | -18.280 | 7.187  | 1.00 | 0.00 | D | C |
| ATOM 18323 | CD1 TYR B 654 | 2.092 | -18.638 | 6.498  | 1.00 | 0.00 | D | C |
| ATOM 18324 | CE1 TYR B 654 | 1.097 | -17.719 | 6.258  | 1.00 | 0.00 | D | C |
| ATOM 18325 | CZ TYR B 654  | 1.217 | -16.425 | 6.701  | 1.00 | 0.00 | D | C |
| ATOM 18326 | OH TYR B 654  | 0.192 | -15.488 | 6.450  | 1.00 | 0.00 | D | O |
| ATOM 18327 | CD2 TYR B 654 | 3.320 | -16.982 | 7.621  | 1.00 | 0.00 | D | C |
| ATOM 18328 | CE2 TYR B 654 | 2.338 | -16.049 | 7.393  | 1.00 | 0.00 | D | C |
| ATOM 18329 | C TYR B 654   | 4.795 | -21.347 | 8.648  | 1.00 | 0.00 | D | C |
| ATOM 18330 | O TYR B 654   | 5.982 | -21.401 | 8.972  | 1.00 | 0.00 | D | O |
| ATOM 18331 | N ASP B 655   | 4.110 | -22.416 | 8.203  | 1.00 | 0.00 | D | N |
| ATOM 18332 | CA ASP B 655  | 4.662 | -23.725 | 8.049  | 1.00 | 0.00 | D | C |
| ATOM 18333 | CB ASP B 655  | 3.738 | -24.857 | 8.513  | 1.00 | 0.00 | D | C |
| ATOM 18334 | CG ASP B 655  | 3.665 | -24.788 | 10.027 | 1.00 | 0.00 | D | C |

|      |       |     |     |   |     |        |         |        |      |      |   |   |
|------|-------|-----|-----|---|-----|--------|---------|--------|------|------|---|---|
| ATOM | 18335 | OD1 | ASP | B | 655 | 4.143  | -23.772 | 10.598 | 1.00 | 0.00 | D | O |
| ATOM | 18336 | OD2 | ASP | B | 655 | 3.140  | -25.756 | 10.633 | 1.00 | 0.00 | D | O |
| ATOM | 18337 | C   | ASP | B | 655 | 4.892  | -23.934 | 6.601  | 1.00 | 0.00 | D | C |
| ATOM | 18338 | O   | ASP | B | 655 | 4.087  | -23.532 | 5.760  | 1.00 | 0.00 | D | O |
| ATOM | 18339 | N   | PHE | B | 656 | 5.997  | -24.626 | 6.280  | 1.00 | 0.00 | D | N |
| ATOM | 18340 | CA  | PHE | B | 656 | 6.325  | -24.812 | 4.910  | 1.00 | 0.00 | D | C |
| ATOM | 18341 | CB  | PHE | B | 656 | 5.192  | -25.467 | 4.111  | 1.00 | 0.00 | D | C |
| ATOM | 18342 | CG  | PHE | B | 656 | 4.255  | -26.065 | 5.092  | 1.00 | 0.00 | D | C |
| ATOM | 18343 | CD1 | PHE | B | 656 | 4.536  | -27.262 | 5.701  | 1.00 | 0.00 | D | C |
| ATOM | 18344 | CE1 | PHE | B | 656 | 3.652  | -27.800 | 6.605  | 1.00 | 0.00 | D | C |
| ATOM | 18345 | CZ  | PHE | B | 656 | 2.485  | -27.136 | 6.901  | 1.00 | 0.00 | D | C |
| ATOM | 18346 | CD2 | PHE | B | 656 | 3.084  | -25.406 | 5.391  | 1.00 | 0.00 | D | C |
| ATOM | 18347 | CE2 | PHE | B | 656 | 2.198  | -25.938 | 6.294  | 1.00 | 0.00 | D | C |
| ATOM | 18348 | C   | PHE | B | 656 | 6.451  | -23.445 | 4.362  | 1.00 | 0.00 | D | C |
| ATOM | 18349 | O   | PHE | B | 656 | 5.967  | -23.182 | 3.274  | 1.00 | 0.00 | D | O |
| ATOM | 18350 | N   | LYS | B | 657 | 7.046  | -22.508 | 5.114  | 1.00 | 0.00 | D | N |
| ATOM | 18351 | CA  | LYS | B | 657 | 7.180  | -21.175 | 4.612  | 1.00 | 0.00 | D | C |
| ATOM | 18352 | CB  | LYS | B | 657 | 7.738  | -20.167 | 5.619  | 1.00 | 0.00 | D | C |
| ATOM | 18353 | CG  | LYS | B | 657 | 7.601  | -18.734 | 5.105  | 1.00 | 0.00 | D | C |
| ATOM | 18354 | CD  | LYS | B | 657 | 6.141  | -18.287 | 5.009  | 1.00 | 0.00 | D | C |
| ATOM | 18355 | CE  | LYS | B | 657 | 5.957  | -16.856 | 4.503  | 1.00 | 0.00 | D | C |
| ATOM | 18356 | NZ  | LYS | B | 657 | 4.523  | -16.493 | 4.547  | 1.00 | 0.00 | D | N |
| ATOM | 18357 | C   | LYS | B | 657 | 8.120  | -21.197 | 3.461  | 1.00 | 0.00 | D | C |
| ATOM | 18358 | O   | LYS | B | 657 | 7.977  | -20.425 | 2.522  | 1.00 | 0.00 | D | O |
| ATOM | 18359 | N   | ALA | B | 658 | 9.145  | -22.057 | 3.507  | 1.00 | 0.00 | D | N |
| ATOM | 18360 | CA  | ALA | B | 658 | 10.041 | -22.074 | 2.392  | 1.00 | 0.00 | D | C |
| ATOM | 18361 | CB  | ALA | B | 658 | 11.186 | -23.084 | 2.556  | 1.00 | 0.00 | D | C |
| ATOM | 18362 | C   | ALA | B | 658 | 9.252  | -22.490 | 1.196  | 1.00 | 0.00 | D | C |
| ATOM | 18363 | O   | ALA | B | 658 | 9.406  | -21.920 | 0.116  | 1.00 | 0.00 | D | O |
| ATOM | 18364 | N   | VAL | B | 659 | 8.384  | -23.510 | 1.349  | 1.00 | 0.00 | D | N |
| ATOM | 18365 | CA  | VAL | B | 659 | 7.616  | -23.925 | 0.214  | 1.00 | 0.00 | D | C |
| ATOM | 18366 | CB  | VAL | B | 659 | 6.826  | -25.201 | 0.371  | 1.00 | 0.00 | D | C |
| ATOM | 18367 | CG1 | VAL | B | 659 | 7.762  | -26.326 | 0.834  | 1.00 | 0.00 | D | C |
| ATOM | 18368 | CG2 | VAL | B | 659 | 5.585  | -24.958 | 1.235  | 1.00 | 0.00 | D | C |
| ATOM | 18369 | C   | VAL | B | 659 | 6.621  | -22.849 | -0.106 | 1.00 | 0.00 | D | C |
| ATOM | 18370 | O   | VAL | B | 659 | 6.280  | -22.631 | -1.263 | 1.00 | 0.00 | D | O |
| ATOM | 18371 | N   | PHE | B | 660 | 6.110  | -22.181 | 0.940  | 1.00 | 0.00 | D | N |
| ATOM | 18372 | CA  | PHE | B | 660 | 5.068  | -21.194 | 0.913  | 1.00 | 0.00 | D | C |



|            |     |           |        |         |        |      |      |   |   |
|------------|-----|-----------|--------|---------|--------|------|------|---|---|
| ATOM 18373 | CB  | PHE B 660 | 4.622  | -20.756 | 2.324  | 1.00 | 0.00 | D | C |
| ATOM 18374 | CG  | PHE B 660 | 3.556  | -19.712 | 2.207  | 1.00 | 0.00 | D | C |
| ATOM 18375 | CD1 | PHE B 660 | 3.885  | -18.382 | 2.081  | 1.00 | 0.00 | D | C |
| ATOM 18376 | CE1 | PHE B 660 | 2.912  | -17.414 | 1.976  | 1.00 | 0.00 | D | C |
| ATOM 18377 | CZ  | PHE B 660 | 1.586  | -17.771 | 1.999  | 1.00 | 0.00 | D | C |
| ATOM 18378 | CD2 | PHE B 660 | 2.223  | -20.061 | 2.232  | 1.00 | 0.00 | D | C |
| ATOM 18379 | CE2 | PHE B 660 | 1.246  | -19.096 | 2.129  | 1.00 | 0.00 | D | C |
| ATOM 18380 | C   | PHE B 660 | 5.500  | -19.976 | 0.179  | 1.00 | 0.00 | D | C |
| ATOM 18381 | O   | PHE B 660 | 4.785  | -19.467 | -0.677 | 1.00 | 0.00 | D | O |
| ATOM 18382 | N   | ILE B 661 | 6.703  | -19.487 | 0.491  | 1.00 | 0.00 | D | N |
| ATOM 18383 | CA  | ILE B 661 | 7.236  | -18.298 | -0.086 | 1.00 | 0.00 | D | C |
| ATOM 18384 | CB  | ILE B 661 | 8.588  | -17.997 | 0.490  | 1.00 | 0.00 | D | C |
| ATOM 18385 | CG2 | ILE B 661 | 8.413  | -17.692 | 1.988  | 1.00 | 0.00 | D | C |
| ATOM 18386 | CG1 | ILE B 661 | 9.526  | -19.180 | 0.213  | 1.00 | 0.00 | D | C |
| ATOM 18387 | CD  | ILE B 661 | 10.959 | -18.976 | 0.671  | 1.00 | 0.00 | D | C |
| ATOM 18388 | C   | ILE B 661 | 7.330  | -18.548 | -1.548 | 1.00 | 0.00 | D | C |
| ATOM 18389 | O   | ILE B 661 | 6.963  | -17.701 | -2.357 | 1.00 | 0.00 | D | O |
| ATOM 18390 | N   | ILE B 662 | 7.783  | -19.753 | -1.925 | 1.00 | 0.00 | D | N |
| ATOM 18391 | CA  | ILE B 662 | 7.928  | -20.085 | -3.304 | 1.00 | 0.00 | D | C |
| ATOM 18392 | CB  | ILE B 662 | 8.491  | -21.462 | -3.480 | 1.00 | 0.00 | D | C |
| ATOM 18393 | CG2 | ILE B 662 | 8.545  | -21.771 | -4.984 | 1.00 | 0.00 | D | C |
| ATOM 18394 | CG1 | ILE B 662 | 9.860  | -21.542 | -2.787 | 1.00 | 0.00 | D | C |
| ATOM 18395 | CD  | ILE B 662 | 10.350 | -22.967 | -2.561 | 1.00 | 0.00 | D | C |
| ATOM 18396 | C   | ILE B 662 | 6.574  | -20.036 | -3.936 | 1.00 | 0.00 | D | C |
| ATOM 18397 | O   | ILE B 662 | 6.415  | -19.537 | -5.049 | 1.00 | 0.00 | D | O |
| ATOM 18398 | N   | LEU B 663 | 5.555  | -20.548 | -3.224 | 1.00 | 0.00 | D | N |
| ATOM 18399 | CA  | LEU B 663 | 4.213  | -20.608 | -3.726 | 1.00 | 0.00 | D | C |
| ATOM 18400 | CB  | LEU B 663 | 3.291  | -21.343 | -2.732 | 1.00 | 0.00 | D | C |
| ATOM 18401 | CG  | LEU B 663 | 1.819  | -21.476 | -3.161 | 1.00 | 0.00 | D | C |
| ATOM 18402 | CD1 | LEU B 663 | 1.068  | -20.140 | -3.044 | 1.00 | 0.00 | D | C |
| ATOM 18403 | CD2 | LEU B 663 | 1.711  | -22.097 | -4.560 | 1.00 | 0.00 | D | C |
| ATOM 18404 | C   | LEU B 663 | 3.716  | -19.212 | -3.958 | 1.00 | 0.00 | D | C |
| ATOM 18405 | O   | LEU B 663 | 3.046  | -18.932 | -4.953 | 1.00 | 0.00 | D | O |
| ATOM 18406 | N   | LEU B 664 | 4.034  | -18.289 | -3.033 | 1.00 | 0.00 | D | N |
| ATOM 18407 | CA  | LEU B 664 | 3.573  | -16.937 | -3.125 | 1.00 | 0.00 | D | C |
| ATOM 18408 | CB  | LEU B 664 | 3.922  | -16.162 | -1.841 | 1.00 | 0.00 | D | C |
| ATOM 18409 | CG  | LEU B 664 | 3.225  | -14.802 | -1.692 | 1.00 | 0.00 | D | C |
| ATOM 18410 | CD1 | LEU B 664 | 3.720  | -13.800 | -2.738 | 1.00 | 0.00 | D | C |

|      |       |     |     |   |     |        |         |         |      |      |   |   |
|------|-------|-----|-----|---|-----|--------|---------|---------|------|------|---|---|
| ATOM | 18411 | CD2 | LEU | B | 664 | 1.695  | -14.959 | -1.690  | 1.00 | 0.00 | D | C |
| ATOM | 18412 | C   | LEU | B | 664 | 4.203  | -16.295 | -4.321  | 1.00 | 0.00 | D | C |
| ATOM | 18413 | O   | LEU | B | 664 | 3.545  | -15.578 | -5.077  | 1.00 | 0.00 | D | O |
| ATOM | 18414 | N   | LEU | B | 665 | 5.507  | -16.553 | -4.543  | 1.00 | 0.00 | D | N |
| ATOM | 18415 | CA  | LEU | B | 665 | 6.163  | -15.977 | -5.678  | 1.00 | 0.00 | D | C |
| ATOM | 18416 | CB  | LEU | B | 665 | 7.679  | -16.233 | -5.726  | 1.00 | 0.00 | D | C |
| ATOM | 18417 | CG  | LEU | B | 665 | 8.496  | -15.292 | -4.813  | 1.00 | 0.00 | D | C |
| ATOM | 18418 | CD1 | LEU | B | 665 | 8.100  | -15.413 | -3.336  | 1.00 | 0.00 | D | C |
| ATOM | 18419 | CD2 | LEU | B | 665 | 10.003 | -15.479 | -5.037  | 1.00 | 0.00 | D | C |
| ATOM | 18420 | C   | LEU | B | 665 | 5.541  | -16.495 | -6.932  | 1.00 | 0.00 | D | C |
| ATOM | 18421 | O   | LEU | B | 665 | 5.341  | -15.740 | -7.881  | 1.00 | 0.00 | D | O |
| ATOM | 18422 | N   | ALA | B | 666 | 5.209  | -17.797 | -6.980  | 1.00 | 0.00 | D | N |
| ATOM | 18423 | CA  | ALA | B | 666 | 4.658  | -18.350 | -8.181  | 1.00 | 0.00 | D | C |
| ATOM | 18424 | CB  | ALA | B | 666 | 4.420  | -19.866 | -8.075  | 1.00 | 0.00 | D | C |
| ATOM | 18425 | C   | ALA | B | 666 | 3.334  | -17.719 | -8.499  | 1.00 | 0.00 | D | C |
| ATOM | 18426 | O   | ALA | B | 666 | 3.095  | -17.314 | -9.635  | 1.00 | 0.00 | D | O |
| ATOM | 18427 | N   | TYR | B | 667 | 2.430  | -17.627 | -7.504  | 1.00 | 0.00 | D | N |
| ATOM | 18428 | CA  | TYR | B | 667 | 1.117  | -17.107 | -7.760  | 1.00 | 0.00 | D | C |
| ATOM | 18429 | CB  | TYR | B | 667 | 0.149  | -17.365 | -6.594  | 1.00 | 0.00 | D | C |
| ATOM | 18430 | CG  | TYR | B | 667 | -1.158 | -16.735 | -6.931  | 1.00 | 0.00 | D | C |
| ATOM | 18431 | CD1 | TYR | B | 667 | -1.922 | -17.219 | -7.965  | 1.00 | 0.00 | D | C |
| ATOM | 18432 | CE1 | TYR | B | 667 | -3.133 | -16.649 | -8.273  | 1.00 | 0.00 | D | C |
| ATOM | 18433 | CZ  | TYR | B | 667 | -3.595 | -15.587 | -7.539  | 1.00 | 0.00 | D | C |
| ATOM | 18434 | OH  | TYR | B | 667 | -4.839 | -15.003 | -7.855  | 1.00 | 0.00 | D | O |
| ATOM | 18435 | CD2 | TYR | B | 667 | -1.631 | -15.671 | -6.196  | 1.00 | 0.00 | D | C |
| ATOM | 18436 | CE2 | TYR | B | 667 | -2.841 | -15.096 | -6.499  | 1.00 | 0.00 | D | C |
| ATOM | 18437 | C   | TYR | B | 667 | 1.138  | -15.639 | -8.037  | 1.00 | 0.00 | D | C |
| ATOM | 18438 | O   | TYR | B | 667 | 0.541  | -15.177 | -9.008  | 1.00 | 0.00 | D | O |
| ATOM | 18439 | N   | VAL | B | 668 | 1.833  | -14.862 | -7.191  | 1.00 | 0.00 | D | N |
| ATOM | 18440 | CA  | VAL | B | 668 | 1.806  | -13.439 | -7.348  | 1.00 | 0.00 | D | C |
| ATOM | 18441 | CB  | VAL | B | 668 | 2.510  | -12.708 | -6.246  | 1.00 | 0.00 | D | C |
| ATOM | 18442 | CG1 | VAL | B | 668 | 2.487  | -11.204 | -6.571  | 1.00 | 0.00 | D | C |
| ATOM | 18443 | CG2 | VAL | B | 668 | 1.839  | -13.070 | -4.910  | 1.00 | 0.00 | D | C |
| ATOM | 18444 | C   | VAL | B | 668 | 2.463  | -13.045 | -8.629  | 1.00 | 0.00 | D | C |
| ATOM | 18445 | O   | VAL | B | 668 | 1.923  | -12.245 | -9.392  | 1.00 | 0.00 | D | O |
| ATOM | 18446 | N   | ILE | B | 669 | 3.646  | -13.616 | -8.920  | 1.00 | 0.00 | D | N |
| ATOM | 18447 | CA  | ILE | B | 669 | 4.349  | -13.156 | -10.079 | 1.00 | 0.00 | D | C |
| ATOM | 18448 | CB  | ILE | B | 669 | 5.733  | -13.745 | -10.231 | 1.00 | 0.00 | D | C |

|      |       |     |     |   |     |        |         |         |      |      |   |   |
|------|-------|-----|-----|---|-----|--------|---------|---------|------|------|---|---|
| ATOM | 18449 | CG2 | ILE | B | 669 | 6.500  | -13.393 | -8.942  | 1.00 | 0.00 | D | C |
| ATOM | 18450 | CG1 | ILE | B | 669 | 5.731  | -15.251 | -10.551 | 1.00 | 0.00 | D | C |
| ATOM | 18451 | CD  | ILE | B | 669 | 5.532  | -15.568 | -12.035 | 1.00 | 0.00 | D | C |
| ATOM | 18452 | C   | ILE | B | 669 | 3.525  | -13.466 | -11.283 | 1.00 | 0.00 | D | C |
| ATOM | 18453 | O   | ILE | B | 669 | 3.350  | -12.620 | -12.157 | 1.00 | 0.00 | D | O |
| ATOM | 18454 | N   | LEU | B | 670 | 2.956  | -14.681 | -11.341 | 1.00 | 0.00 | D | N |
| ATOM | 18455 | CA  | LEU | B | 670 | 2.211  | -15.088 | -12.495 | 1.00 | 0.00 | D | C |
| ATOM | 18456 | CB  | LEU | B | 670 | 1.647  | -16.515 | -12.353 | 1.00 | 0.00 | D | C |
| ATOM | 18457 | CG  | LEU | B | 670 | 0.668  | -16.909 | -13.477 | 1.00 | 0.00 | D | C |
| ATOM | 18458 | CD1 | LEU | B | 670 | 1.358  | -16.900 | -14.848 | 1.00 | 0.00 | D | C |
| ATOM | 18459 | CD2 | LEU | B | 670 | -0.038 | -18.242 | -13.176 | 1.00 | 0.00 | D | C |
| ATOM | 18460 | C   | LEU | B | 670 | 1.036  | -14.187 | -12.683 | 1.00 | 0.00 | D | C |
| ATOM | 18461 | O   | LEU | B | 670 | 0.794  | -13.696 | -13.785 | 1.00 | 0.00 | D | O |
| ATOM | 18462 | N   | THR | B | 671 | 0.285  | -13.920 | -11.599 | 1.00 | 0.00 | D | N |
| ATOM | 18463 | CA  | THR | B | 671 | -0.930 | -13.178 | -11.776 | 1.00 | 0.00 | D | C |
| ATOM | 18464 | CB  | THR | B | 671 | -1.784 | -13.056 | -10.543 | 1.00 | 0.00 | D | C |
| ATOM | 18465 | OG1 | THR | B | 671 | -1.198 | -12.193 | -9.582  | 1.00 | 0.00 | D | O |
| ATOM | 18466 | CG2 | THR | B | 671 | -1.940 | -14.456 | -9.945  | 1.00 | 0.00 | D | C |
| ATOM | 18467 | C   | THR | B | 671 | -0.625 | -11.798 | -12.241 | 1.00 | 0.00 | D | C |
| ATOM | 18468 | O   | THR | B | 671 | -1.282 | -11.278 | -13.141 | 1.00 | 0.00 | D | O |
| ATOM | 18469 | N   | TYR | B | 672 | 0.374  | -11.150 | -11.627 | 1.00 | 0.00 | D | N |
| ATOM | 18470 | CA  | TYR | B | 672 | 0.663  | -9.807  | -12.024 | 1.00 | 0.00 | D | C |
| ATOM | 18471 | CB  | TYR | B | 672 | 1.733  | -9.156  | -11.126 | 1.00 | 0.00 | D | C |
| ATOM | 18472 | CG  | TYR | B | 672 | 1.992  | -7.766  | -11.602 | 1.00 | 0.00 | D | C |
| ATOM | 18473 | CD1 | TYR | B | 672 | 1.099  | -6.747  | -11.340 | 1.00 | 0.00 | D | C |
| ATOM | 18474 | CE1 | TYR | B | 672 | 1.346  | -5.468  | -11.779 | 1.00 | 0.00 | D | C |
| ATOM | 18475 | CZ  | TYR | B | 672 | 2.500  | -5.191  | -12.481 | 1.00 | 0.00 | D | C |
| ATOM | 18476 | OH  | TYR | B | 672 | 2.763  | -3.881  | -12.936 | 1.00 | 0.00 | D | O |
| ATOM | 18477 | CD2 | TYR | B | 672 | 3.143  | -7.475  | -12.293 | 1.00 | 0.00 | D | C |
| ATOM | 18478 | CE2 | TYR | B | 672 | 3.397  | -6.197  | -12.734 | 1.00 | 0.00 | D | C |
| ATOM | 18479 | C   | TYR | B | 672 | 1.164  | -9.842  | -13.425 | 1.00 | 0.00 | D | C |
| ATOM | 18480 | O   | TYR | B | 672 | 0.746  | -9.056  | -14.274 | 1.00 | 0.00 | D | O |
| ATOM | 18481 | N   | ILE | B | 673 | 2.085  | -10.781 | -13.701 | 1.00 | 0.00 | D | N |
| ATOM | 18482 | CA  | ILE | B | 673 | 2.700  | -10.780 | -14.983 | 1.00 | 0.00 | D | C |
| ATOM | 18483 | CB  | ILE | B | 673 | 3.947  | -11.617 | -15.012 | 1.00 | 0.00 | D | C |
| ATOM | 18484 | CG2 | ILE | B | 673 | 3.583  | -13.101 | -14.856 | 1.00 | 0.00 | D | C |
| ATOM | 18485 | CG1 | ILE | B | 673 | 4.749  | -11.286 | -16.274 | 1.00 | 0.00 | D | C |
| ATOM | 18486 | CD  | ILE | B | 673 | 5.266  | -9.848  | -16.283 | 1.00 | 0.00 | D | C |

|            |     |           |        |         |         |      |      |   |   |
|------------|-----|-----------|--------|---------|---------|------|------|---|---|
| ATOM 18487 | C   | ILE B 673 | 1.784  | -11.188 | -16.106 | 1.00 | 0.00 | D | C |
| ATOM 18488 | O   | ILE B 673 | 1.691  | -10.467 | -17.095 | 1.00 | 0.00 | D | O |
| ATOM 18489 | N   | LEU B 674 | 1.127  | -12.367 | -16.033 | 1.00 | 0.00 | D | N |
| ATOM 18490 | CA  | LEU B 674 | 0.328  | -12.788 | -17.155 | 1.00 | 0.00 | D | C |
| ATOM 18491 | CB  | LEU B 674 | 0.204  | -14.316 | -17.241 | 1.00 | 0.00 | D | C |
| ATOM 18492 | CG  | LEU B 674 | 1.572  | -14.996 | -17.420 | 1.00 | 0.00 | D | C |
| ATOM 18493 | CD1 | LEU B 674 | 1.415  | -16.481 | -17.768 | 1.00 | 0.00 | D | C |
| ATOM 18494 | CD2 | LEU B 674 | 2.448  | -14.231 | -18.423 | 1.00 | 0.00 | D | C |
| ATOM 18495 | C   | LEU B 674 | -1.056 | -12.207 | -17.244 | 1.00 | 0.00 | D | C |
| ATOM 18496 | O   | LEU B 674 | -1.429 | -11.624 | -18.259 | 1.00 | 0.00 | D | O |
| ATOM 18497 | N   | LEU B 675 | -1.854 | -12.348 | -16.165 | 1.00 | 0.00 | D | N |
| ATOM 18498 | CA  | LEU B 675 | -3.254 | -12.002 | -16.195 | 1.00 | 0.00 | D | C |
| ATOM 18499 | CB  | LEU B 675 | -3.962 | -12.355 | -14.874 | 1.00 | 0.00 | D | C |
| ATOM 18500 | CG  | LEU B 675 | -4.287 | -13.846 | -14.679 | 1.00 | 0.00 | D | C |
| ATOM 18501 | CD1 | LEU B 675 | -5.427 | -14.284 | -15.613 | 1.00 | 0.00 | D | C |
| ATOM 18502 | CD2 | LEU B 675 | -3.033 | -14.722 | -14.810 | 1.00 | 0.00 | D | C |
| ATOM 18503 | C   | LEU B 675 | -3.491 | -10.543 | -16.397 | 1.00 | 0.00 | D | C |
| ATOM 18504 | O   | LEU B 675 | -4.199 | -10.143 | -17.320 | 1.00 | 0.00 | D | O |
| ATOM 18505 | N   | LEU B 676 | -2.888 | -9.707  | -15.537 | 1.00 | 0.00 | D | N |
| ATOM 18506 | CA  | LEU B 676 | -3.184 | -8.308  | -15.597 | 1.00 | 0.00 | D | C |
| ATOM 18507 | CB  | LEU B 676 | -2.552 | -7.493  | -14.458 | 1.00 | 0.00 | D | C |
| ATOM 18508 | CG  | LEU B 676 | -3.242 | -7.725  | -13.104 | 1.00 | 0.00 | D | C |
| ATOM 18509 | CD1 | LEU B 676 | -4.703 | -7.243  | -13.158 | 1.00 | 0.00 | D | C |
| ATOM 18510 | CD2 | LEU B 676 | -3.103 | -9.179  | -12.626 | 1.00 | 0.00 | D | C |
| ATOM 18511 | C   | LEU B 676 | -2.707 | -7.750  | -16.886 | 1.00 | 0.00 | D | C |
| ATOM 18512 | O   | LEU B 676 | -3.434 | -7.015  | -17.550 | 1.00 | 0.00 | D | O |
| ATOM 18513 | N   | ASN B 677 | -1.475 | -8.103  | -17.285 | 1.00 | 0.00 | D | N |
| ATOM 18514 | CA  | ASN B 677 | -0.918 | -7.586  | -18.495 | 1.00 | 0.00 | D | C |
| ATOM 18515 | CB  | ASN B 677 | 0.532  | -8.046  | -18.716 | 1.00 | 0.00 | D | C |
| ATOM 18516 | CG  | ASN B 677 | 1.358  | -7.493  | -17.564 | 1.00 | 0.00 | D | C |
| ATOM 18517 | OD1 | ASN B 677 | 0.899  | -6.631  | -16.818 | 1.00 | 0.00 | D | O |
| ATOM 18518 | ND2 | ASN B 677 | 2.613  | -7.992  | -17.416 | 1.00 | 0.00 | D | N |
| ATOM 18519 | C   | ASN B 677 | -1.737 | -8.097  | -19.633 | 1.00 | 0.00 | D | C |
| ATOM 18520 | O   | ASN B 677 | -2.028 | -7.363  | -20.575 | 1.00 | 0.00 | D | O |
| ATOM 18521 | N   | MET B 678 | -2.133 | -9.379  | -19.568 | 1.00 | 0.00 | D | N |
| ATOM 18522 | CA  | MET B 678 | -2.897 | -9.984  | -20.620 | 1.00 | 0.00 | D | C |
| ATOM 18523 | CB  | MET B 678 | -3.216 | -11.461 | -20.334 | 1.00 | 0.00 | D | C |
| ATOM 18524 | CG  | MET B 678 | -4.102 | -12.135 | -21.384 | 1.00 | 0.00 | D | C |

|      |       |     |           |        |         |         |      |      |   |   |
|------|-------|-----|-----------|--------|---------|---------|------|------|---|---|
| ATOM | 18525 | SD  | MET B 678 | -4.282 | -13.933 | -21.161 | 1.00 | 0.00 | D | S |
| ATOM | 18526 | CE  | MET B 678 | -5.161 | -13.823 | -19.575 | 1.00 | 0.00 | D | C |
| ATOM | 18527 | C   | MET B 678 | -4.202 | -9.275  | -20.759 | 1.00 | 0.00 | D | C |
| ATOM | 18528 | O   | MET B 678 | -4.615 | -8.951  | -21.869 | 1.00 | 0.00 | D | O |
| ATOM | 18529 | N   | LEU B 679 | -4.901 | -9.005  | -19.637 | 1.00 | 0.00 | D | N |
| ATOM | 18530 | CA  | LEU B 679 | -6.175 | -8.366  | -19.785 | 1.00 | 0.00 | D | C |
| ATOM | 18531 | CB  | LEU B 679 | -7.017 | -8.327  | -18.486 | 1.00 | 0.00 | D | C |
| ATOM | 18532 | CG  | LEU B 679 | -6.832 | -7.108  | -17.556 | 1.00 | 0.00 | D | C |
| ATOM | 18533 | CD1 | LEU B 679 | -7.560 | -5.858  | -18.085 | 1.00 | 0.00 | D | C |
| ATOM | 18534 | CD2 | LEU B 679 | -7.245 | -7.452  | -16.115 | 1.00 | 0.00 | D | C |
| ATOM | 18535 | C   | LEU B 679 | -5.963 | -6.970  | -20.283 | 1.00 | 0.00 | D | C |
| ATOM | 18536 | O   | LEU B 679 | -6.662 | -6.512  | -21.185 | 1.00 | 0.00 | D | O |
| ATOM | 18537 | N   | ILE B 680 | -4.962 | -6.271  | -19.713 | 1.00 | 0.00 | D | N |
| ATOM | 18538 | CA  | ILE B 680 | -4.692 | -4.892  | -20.017 | 1.00 | 0.00 | D | C |
| ATOM | 18539 | CB  | ILE B 680 | -3.600 | -4.303  | -19.170 | 1.00 | 0.00 | D | C |
| ATOM | 18540 | CG2 | ILE B 680 | -3.312 | -2.884  | -19.688 | 1.00 | 0.00 | D | C |
| ATOM | 18541 | CG1 | ILE B 680 | -3.998 | -4.340  | -17.681 | 1.00 | 0.00 | D | C |
| ATOM | 18542 | CD  | ILE B 680 | -5.285 | -3.580  | -17.367 | 1.00 | 0.00 | D | C |
| ATOM | 18543 | C   | ILE B 680 | -4.298 | -4.760  | -21.453 | 1.00 | 0.00 | D | C |
| ATOM | 18544 | O   | ILE B 680 | -4.686 | -3.806  | -22.126 | 1.00 | 0.00 | D | O |
| ATOM | 18545 | N   | ALA B 681 | -3.501 | -5.715  | -21.960 | 1.00 | 0.00 | D | N |
| ATOM | 18546 | CA  | ALA B 681 | -3.050 | -5.680  | -23.319 | 1.00 | 0.00 | D | C |
| ATOM | 18547 | CB  | ALA B 681 | -2.161 | -6.881  | -23.686 | 1.00 | 0.00 | D | C |
| ATOM | 18548 | C   | ALA B 681 | -4.267 | -5.740  | -24.178 | 1.00 | 0.00 | D | C |
| ATOM | 18549 | O   | ALA B 681 | -4.349 | -5.082  | -25.214 | 1.00 | 0.00 | D | O |
| ATOM | 18550 | N   | LEU B 682 | -5.251 | -6.540  | -23.739 | 1.00 | 0.00 | D | N |
| ATOM | 18551 | CA  | LEU B 682 | -6.491 | -6.741  | -24.428 | 1.00 | 0.00 | D | C |
| ATOM | 18552 | CB  | LEU B 682 | -7.422 | -7.698  | -23.658 | 1.00 | 0.00 | D | C |
| ATOM | 18553 | CG  | LEU B 682 | -6.878 | -9.127  | -23.481 | 1.00 | 0.00 | D | C |
| ATOM | 18554 | CD1 | LEU B 682 | -7.841 | -9.986  | -22.646 | 1.00 | 0.00 | D | C |
| ATOM | 18555 | CD2 | LEU B 682 | -6.549 | -9.770  | -24.838 | 1.00 | 0.00 | D | C |
| ATOM | 18556 | C   | LEU B 682 | -7.224 | -5.431  | -24.501 | 1.00 | 0.00 | D | C |
| ATOM | 18557 | O   | LEU B 682 | -7.867 | -5.129  | -25.506 | 1.00 | 0.00 | D | O |
| ATOM | 18558 | N   | MET B 683 | -7.121 | -4.606  | -23.440 | 1.00 | 0.00 | D | N |
| ATOM | 18559 | CA  | MET B 683 | -7.872 | -3.386  | -23.293 | 1.00 | 0.00 | D | C |
| ATOM | 18560 | CB  | MET B 683 | -7.489 | -2.607  | -22.017 | 1.00 | 0.00 | D | C |
| ATOM | 18561 | CG  | MET B 683 | -7.846 | -3.278  | -20.687 | 1.00 | 0.00 | D | C |
| ATOM | 18562 | SD  | MET B 683 | -9.599 | -3.176  | -20.215 | 1.00 | 0.00 | D | S |

|      |       |     |           |         |        |         |      |      |   |   |
|------|-------|-----|-----------|---------|--------|---------|------|------|---|---|
| ATOM | 18563 | CE  | MET B 683 | -9.300  | -3.488 | -18.449 | 1.00 | 0.00 | D | C |
| ATOM | 18564 | C   | MET B 683 | -7.608  | -2.437 | -24.423 | 1.00 | 0.00 | D | C |
| ATOM | 18565 | O   | MET B 683 | -8.534  | -1.822 | -24.950 | 1.00 | 0.00 | D | O |
| ATOM | 18566 | N   | GLY B 684 | -6.345  | -2.296 | -24.854 | 1.00 | 0.00 | D | N |
| ATOM | 18567 | CA  | GLY B 684 | -6.043  | -1.296 | -25.838 | 1.00 | 0.00 | D | C |
| ATOM | 18568 | C   | GLY B 684 | -6.829  | -1.542 | -27.087 | 1.00 | 0.00 | D | C |
| ATOM | 18569 | O   | GLY B 684 | -7.322  | -0.603 | -27.705 | 1.00 | 0.00 | D | O |
| ATOM | 18570 | N   | GLU B 685 | -6.980  | -2.814 | -27.487 | 1.00 | 0.00 | D | N |
| ATOM | 18571 | CA  | GLU B 685 | -7.616  | -3.145 | -28.729 | 1.00 | 0.00 | D | C |
| ATOM | 18572 | CB  | GLU B 685 | -7.702  | -4.665 | -28.926 | 1.00 | 0.00 | D | C |
| ATOM | 18573 | CG  | GLU B 685 | -6.334  | -5.342 | -29.007 | 1.00 | 0.00 | D | C |
| ATOM | 18574 | CD  | GLU B 685 | -6.552  | -6.842 | -28.860 | 1.00 | 0.00 | D | C |
| ATOM | 18575 | OE1 | GLU B 685 | -6.748  | -7.296 | -27.700 | 1.00 | 0.00 | D | O |
| ATOM | 18576 | OE2 | GLU B 685 | -6.530  | -7.552 | -29.898 | 1.00 | 0.00 | D | O |
| ATOM | 18577 | C   | GLU B 685 | -9.024  | -2.639 | -28.736 | 1.00 | 0.00 | D | C |
| ATOM | 18578 | O   | GLU B 685 | -9.469  | -2.049 | -29.718 | 1.00 | 0.00 | D | O |
| ATOM | 18579 | N   | THR B 686 | -9.760  | -2.857 | -27.631 | 1.00 | 0.00 | D | N |
| ATOM | 18580 | CA  | THR B 686 | -11.136 | -2.455 | -27.574 | 1.00 | 0.00 | D | C |
| ATOM | 18581 | CB  | THR B 686 | -11.812 | -2.835 | -26.289 | 1.00 | 0.00 | D | C |
| ATOM | 18582 | OG1 | THR B 686 | -11.210 | -2.157 | -25.194 | 1.00 | 0.00 | D | O |
| ATOM | 18583 | CG2 | THR B 686 | -11.696 | -4.355 | -26.104 | 1.00 | 0.00 | D | C |
| ATOM | 18584 | C   | THR B 686 | -11.202 | -0.970 | -27.681 | 1.00 | 0.00 | D | C |
| ATOM | 18585 | O   | THR B 686 | -12.058 | -0.428 | -28.377 | 1.00 | 0.00 | D | O |
| ATOM | 18586 | N   | VAL B 687 | -10.295 | -0.274 | -26.967 | 1.00 | 0.00 | D | N |
| ATOM | 18587 | CA  | VAL B 687 | -10.265 | 1.158  | -26.988 | 1.00 | 0.00 | D | C |
| ATOM | 18588 | CB  | VAL B 687 | -9.257  | 1.740  | -26.039 | 1.00 | 0.00 | D | C |
| ATOM | 18589 | CG1 | VAL B 687 | -9.203  | 3.261  | -26.262 | 1.00 | 0.00 | D | C |
| ATOM | 18590 | CG2 | VAL B 687 | -9.643  | 1.339  | -24.607 | 1.00 | 0.00 | D | C |
| ATOM | 18591 | C   | VAL B 687 | -9.910  | 1.632  | -28.367 | 1.00 | 0.00 | D | C |
| ATOM | 18592 | O   | VAL B 687 | -10.485 | 2.596  | -28.869 | 1.00 | 0.00 | D | O |
| ATOM | 18593 | N   | ASN B 688 | -8.932  | 0.980  | -29.016 | 1.00 | 0.00 | D | N |
| ATOM | 18594 | CA  | ASN B 688 | -8.514  | 1.413  | -30.318 | 1.00 | 0.00 | D | C |
| ATOM | 18595 | CB  | ASN B 688 | -7.292  | 0.644  | -30.855 | 1.00 | 0.00 | D | C |
| ATOM | 18596 | CG  | ASN B 688 | -6.031  | 1.205  | -30.210 | 1.00 | 0.00 | D | C |
| ATOM | 18597 | OD1 | ASN B 688 | -5.583  | 2.297  | -30.558 | 1.00 | 0.00 | D | O |
| ATOM | 18598 | ND2 | ASN B 688 | -5.438  | 0.449  | -29.252 | 1.00 | 0.00 | D | N |
| ATOM | 18599 | C   | ASN B 688 | -9.615  | 1.221  | -31.308 | 1.00 | 0.00 | D | C |
| ATOM | 18600 | O   | ASN B 688 | -9.914  | 2.122  | -32.090 | 1.00 | 0.00 | D | O |

|      |       |     |           |         |        |         |      |      |   |   |
|------|-------|-----|-----------|---------|--------|---------|------|------|---|---|
| ATOM | 18601 | N   | LYS B 689 | -10.255 | 0.038  | -31.304 | 1.00 | 0.00 | D | N |
| ATOM | 18602 | CA  | LYS B 689 | -11.255 | -0.200 | -32.297 | 1.00 | 0.00 | D | C |
| ATOM | 18603 | CB  | LYS B 689 | -11.734 | -1.656 | -32.407 | 1.00 | 0.00 | D | C |
| ATOM | 18604 | CG  | LYS B 689 | -12.571 | -2.189 | -31.248 | 1.00 | 0.00 | D | C |
| ATOM | 18605 | CD  | LYS B 689 | -13.277 | -3.485 | -31.653 | 1.00 | 0.00 | D | C |
| ATOM | 18606 | CE  | LYS B 689 | -13.911 | -4.262 | -30.502 | 1.00 | 0.00 | D | C |
| ATOM | 18607 | NZ  | LYS B 689 | -14.430 | -5.553 | -31.007 | 1.00 | 0.00 | D | N |
| ATOM | 18608 | C   | LYS B 689 | -12.424 | 0.699  | -32.069 | 1.00 | 0.00 | D | C |
| ATOM | 18609 | O   | LYS B 689 | -13.017 | 1.200  | -33.022 | 1.00 | 0.00 | D | O |
| ATOM | 18610 | N   | ILE B 690 | -12.782 | 0.938  | -30.797 | 1.00 | 0.00 | D | N |
| ATOM | 18611 | CA  | ILE B 690 | -13.904 | 1.796  | -30.551 | 1.00 | 0.00 | D | C |
| ATOM | 18612 | CB  | ILE B 690 | -14.322 | 1.901  | -29.115 | 1.00 | 0.00 | D | C |
| ATOM | 18613 | CG2 | ILE B 690 | -13.130 | 2.322  | -28.254 | 1.00 | 0.00 | D | C |
| ATOM | 18614 | CG1 | ILE B 690 | -15.531 | 2.841  | -29.019 | 1.00 | 0.00 | D | C |
| ATOM | 18615 | CD  | ILE B 690 | -16.179 | 2.834  | -27.643 | 1.00 | 0.00 | D | C |
| ATOM | 18616 | C   | ILE B 690 | -13.600 | 3.160  | -31.073 | 1.00 | 0.00 | D | C |
| ATOM | 18617 | O   | ILE B 690 | -14.488 | 3.835  | -31.590 | 1.00 | 0.00 | D | O |
| ATOM | 18618 | N   | ALA B 691 | -12.342 | 3.616  | -30.924 | 1.00 | 0.00 | D | N |
| ATOM | 18619 | CA  | ALA B 691 | -11.963 | 4.925  | -31.380 | 1.00 | 0.00 | D | C |
| ATOM | 18620 | CB  | ALA B 691 | -10.498 | 5.257  | -31.053 | 1.00 | 0.00 | D | C |
| ATOM | 18621 | C   | ALA B 691 | -12.129 | 5.027  | -32.870 | 1.00 | 0.00 | D | C |
| ATOM | 18622 | O   | ALA B 691 | -12.644 | 6.023  | -33.373 | 1.00 | 0.00 | D | O |
| ATOM | 18623 | N   | GLN B 692 | -11.704 | 3.996  | -33.628 | 1.00 | 0.00 | D | N |
| ATOM | 18624 | CA  | GLN B 692 | -11.786 | 4.061  | -35.064 | 1.00 | 0.00 | D | C |
| ATOM | 18625 | CB  | GLN B 692 | -11.279 | 2.778  | -35.733 | 1.00 | 0.00 | D | C |
| ATOM | 18626 | CG  | GLN B 692 | -9.841  | 2.402  | -35.397 | 1.00 | 0.00 | D | C |
| ATOM | 18627 | CD  | GLN B 692 | -9.649  | 1.009  | -35.963 | 1.00 | 0.00 | D | C |
| ATOM | 18628 | OE1 | GLN B 692 | -10.033 | 0.748  | -37.101 | 1.00 | 0.00 | D | O |
| ATOM | 18629 | NE2 | GLN B 692 | -9.072  | 0.085  | -35.148 | 1.00 | 0.00 | D | N |
| ATOM | 18630 | C   | GLN B 692 | -13.227 | 4.133  | -35.451 | 1.00 | 0.00 | D | C |
| ATOM | 18631 | O   | GLN B 692 | -13.629 | 4.912  | -36.317 | 1.00 | 0.00 | D | O |
| ATOM | 18632 | N   | GLU B 693 | -14.032 | 3.289  | -34.791 | 1.00 | 0.00 | D | N |
| ATOM | 18633 | CA  | GLU B 693 | -15.436 | 3.123  | -35.010 | 1.00 | 0.00 | D | C |
| ATOM | 18634 | CB  | GLU B 693 | -16.000 | 1.927  | -34.225 | 1.00 | 0.00 | D | C |
| ATOM | 18635 | CG  | GLU B 693 | -15.440 | 0.580  | -34.695 | 1.00 | 0.00 | D | C |
| ATOM | 18636 | CD  | GLU B 693 | -15.899 | -0.497 | -33.722 | 1.00 | 0.00 | D | C |
| ATOM | 18637 | OE1 | GLU B 693 | -15.265 | -0.627 | -32.638 | 1.00 | 0.00 | D | O |
| ATOM | 18638 | OE2 | GLU B 693 | -16.888 | -1.205 | -34.045 | 1.00 | 0.00 | D | O |

|      |       |     |           |         |        |         |      |      |   |   |
|------|-------|-----|-----------|---------|--------|---------|------|------|---|---|
| ATOM | 18639 | C   | GLU B 693 | -16.187 | 4.341  | -34.572 | 1.00 | 0.00 | D | C |
| ATOM | 18640 | O   | GLU B 693 | -17.235 | 4.630  | -35.135 | 1.00 | 0.00 | D | O |
| ATOM | 18641 | N   | SER B 694 | -15.646 | 5.114  | -33.613 | 1.00 | 0.00 | D | N |
| ATOM | 18642 | CA  | SER B 694 | -16.286 | 6.175  | -32.873 | 1.00 | 0.00 | D | C |
| ATOM | 18643 | CB  | SER B 694 | -15.243 | 7.071  | -32.185 | 1.00 | 0.00 | D | C |
| ATOM | 18644 | OG  | SER B 694 | -14.602 | 6.369  | -31.135 | 1.00 | 0.00 | D | O |
| ATOM | 18645 | C   | SER B 694 | -17.103 | 7.097  | -33.708 | 1.00 | 0.00 | D | C |
| ATOM | 18646 | O   | SER B 694 | -18.209 | 7.444  | -33.298 | 1.00 | 0.00 | D | O |
| ATOM | 18647 | N   | LYS B 695 | -16.597 | 7.555  | -34.862 | 1.00 | 0.00 | D | N |
| ATOM | 18648 | CA  | LYS B 695 | -17.418 | 8.451  | -35.623 | 1.00 | 0.00 | D | C |
| ATOM | 18649 | CB  | LYS B 695 | -16.787 | 8.825  | -36.973 | 1.00 | 0.00 | D | C |
| ATOM | 18650 | CG  | LYS B 695 | -15.631 | 9.819  | -36.895 | 1.00 | 0.00 | D | C |
| ATOM | 18651 | CD  | LYS B 695 | -16.068 | 11.213 | -36.448 | 1.00 | 0.00 | D | C |
| ATOM | 18652 | CE  | LYS B 695 | -15.016 | 12.290 | -36.710 | 1.00 | 0.00 | D | C |
| ATOM | 18653 | NZ  | LYS B 695 | -15.621 | 13.626 | -36.524 | 1.00 | 0.00 | D | N |
| ATOM | 18654 | C   | LYS B 695 | -18.676 | 7.706  | -35.950 | 1.00 | 0.00 | D | C |
| ATOM | 18655 | O   | LYS B 695 | -19.785 | 8.185  | -35.713 | 1.00 | 0.00 | D | O |
| ATOM | 18656 | N   | ASN B 696 | -18.496 | 6.473  | -36.444 | 1.00 | 0.00 | D | N |
| ATOM | 18657 | CA  | ASN B 696 | -19.523 | 5.567  | -36.873 | 1.00 | 0.00 | D | C |
| ATOM | 18658 | CB  | ASN B 696 | -18.926 | 4.296  | -37.496 | 1.00 | 0.00 | D | C |
| ATOM | 18659 | CG  | ASN B 696 | -17.961 | 4.711  | -38.597 | 1.00 | 0.00 | D | C |
| ATOM | 18660 | OD1 | ASN B 696 | -18.257 | 5.581  | -39.413 | 1.00 | 0.00 | D | O |
| ATOM | 18661 | ND2 | ASN B 696 | -16.754 | 4.083  | -38.603 | 1.00 | 0.00 | D | N |
| ATOM | 18662 | C   | ASN B 696 | -20.395 | 5.095  | -35.740 | 1.00 | 0.00 | D | C |
| ATOM | 18663 | O   | ASN B 696 | -21.619 | 5.113  | -35.844 | 1.00 | 0.00 | D | O |
| ATOM | 18664 | N   | ILE B 697 | -19.781 | 4.644  | -34.629 | 1.00 | 0.00 | D | N |
| ATOM | 18665 | CA  | ILE B 697 | -20.480 | 4.098  | -33.501 | 1.00 | 0.00 | D | C |
| ATOM | 18666 | CB  | ILE B 697 | -19.552 | 3.580  | -32.447 | 1.00 | 0.00 | D | C |
| ATOM | 18667 | CG2 | ILE B 697 | -18.761 | 2.389  | -33.018 | 1.00 | 0.00 | D | C |
| ATOM | 18668 | CG1 | ILE B 697 | -18.673 | 4.729  | -31.950 | 1.00 | 0.00 | D | C |
| ATOM | 18669 | CD  | ILE B 697 | -17.856 | 4.382  | -30.724 | 1.00 | 0.00 | D | C |
| ATOM | 18670 | C   | ILE B 697 | -21.327 | 5.171  | -32.906 | 1.00 | 0.00 | D | C |
| ATOM | 18671 | O   | ILE B 697 | -22.479 | 4.942  | -32.540 | 1.00 | 0.00 | D | O |
| ATOM | 18672 | N   | TRP B 698 | -20.768 | 6.389  | -32.830 | 1.00 | 0.00 | D | N |
| ATOM | 18673 | CA  | TRP B 698 | -21.466 | 7.506  | -32.289 | 1.00 | 0.00 | D | C |
| ATOM | 18674 | CB  | TRP B 698 | -20.677 | 8.807  | -32.498 | 1.00 | 0.00 | D | C |
| ATOM | 18675 | CG  | TRP B 698 | -21.486 | 10.075 | -32.370 | 1.00 | 0.00 | D | C |
| ATOM | 18676 | CD1 | TRP B 698 | -21.853 | 10.767 | -31.260 | 1.00 | 0.00 | D | C |



|      |       |               |         |        |         |      |      |   |   |
|------|-------|---------------|---------|--------|---------|------|------|---|---|
| ATOM | 18677 | NE1 TRP B 698 | -22.546 | 11.899 | -31.616 | 1.00 | 0.00 | D | N |
| ATOM | 18678 | CE2 TRP B 698 | -22.645 | 11.937 | -32.989 | 1.00 | 0.00 | D | C |
| ATOM | 18679 | CD2 TRP B 698 | -21.997 | 10.810 | -33.493 | 1.00 | 0.00 | D | C |
| ATOM | 18680 | CE3 TRP B 698 | -21.929 | 10.571 | -34.835 | 1.00 | 0.00 | D | C |
| ATOM | 18681 | CZ3 TRP B 698 | -22.528 | 11.486 | -35.671 | 1.00 | 0.00 | D | C |
| ATOM | 18682 | CZ2 TRP B 698 | -23.234 | 12.845 | -33.819 | 1.00 | 0.00 | D | C |
| ATOM | 18683 | CH2 TRP B 698 | -23.167 | 12.601 | -35.172 | 1.00 | 0.00 | D | C |
| ATOM | 18684 | C TRP B 698   | -22.709 | 7.649  | -33.088 | 1.00 | 0.00 | D | C |
| ATOM | 18685 | O TRP B 698   | -23.782 | 7.889  | -32.540 | 1.00 | 0.00 | D | O |
| ATOM | 18686 | N LYS B 699   | -22.579 | 7.508  | -34.416 | 1.00 | 0.00 | D | N |
| ATOM | 18687 | CA LYS B 699  | -23.688 | 7.749  | -35.286 | 1.00 | 0.00 | D | C |
| ATOM | 18688 | CB LYS B 699  | -23.294 | 7.785  | -36.774 | 1.00 | 0.00 | D | C |
| ATOM | 18689 | CG LYS B 699  | -24.208 | 8.680  | -37.623 | 1.00 | 0.00 | D | C |
| ATOM | 18690 | CD LYS B 699  | -25.705 | 8.378  | -37.522 | 1.00 | 0.00 | D | C |
| ATOM | 18691 | CE LYS B 699  | -26.578 | 9.401  | -38.257 | 1.00 | 0.00 | D | C |
| ATOM | 18692 | NZ LYS B 699  | -28.010 | 9.157  | -37.973 | 1.00 | 0.00 | D | N |
| ATOM | 18693 | C LYS B 699   | -24.800 | 6.739  | -35.128 | 1.00 | 0.00 | D | C |
| ATOM | 18694 | O LYS B 699   | -25.966 | 7.123  | -35.075 | 1.00 | 0.00 | D | O |
| ATOM | 18695 | N LEU B 700   | -24.491 | 5.425  | -35.049 | 1.00 | 0.00 | D | N |
| ATOM | 18696 | CA LEU B 700  | -25.535 | 4.423  | -35.051 | 1.00 | 0.00 | D | C |
| ATOM | 18697 | CB LEU B 700  | -25.004 | 2.988  | -35.268 | 1.00 | 0.00 | D | C |
| ATOM | 18698 | CG LEU B 700  | -24.237 | 2.329  | -34.101 | 1.00 | 0.00 | D | C |
| ATOM | 18699 | CD1 LEU B 700 | -25.169 | 1.870  | -32.966 | 1.00 | 0.00 | D | C |
| ATOM | 18700 | CD2 LEU B 700 | -23.354 | 1.183  | -34.616 | 1.00 | 0.00 | D | C |
| ATOM | 18701 | C LEU B 700   | -26.391 | 4.458  | -33.821 | 1.00 | 0.00 | D | C |
| ATOM | 18702 | O LEU B 700   | -27.617 | 4.363  | -33.911 | 1.00 | 0.00 | D | O |
| ATOM | 18703 | N GLN B 701   | -25.762 | 4.598  | -32.640 | 1.00 | 0.00 | D | N |
| ATOM | 18704 | CA GLN B 701  | -26.405 | 4.587  | -31.352 | 1.00 | 0.00 | D | C |
| ATOM | 18705 | CB GLN B 701  | -25.418 | 4.565  | -30.180 | 1.00 | 0.00 | D | C |
| ATOM | 18706 | CG GLN B 701  | -24.534 | 5.802  | -30.077 | 1.00 | 0.00 | D | C |
| ATOM | 18707 | CD GLN B 701  | -23.642 | 5.578  | -28.868 | 1.00 | 0.00 | D | C |
| ATOM | 18708 | OE1 GLN B 701 | -23.723 | 4.531  | -28.225 | 1.00 | 0.00 | D | O |
| ATOM | 18709 | NE2 GLN B 701 | -22.770 | 6.569  | -28.546 | 1.00 | 0.00 | D | N |
| ATOM | 18710 | C GLN B 701   | -27.285 | 5.784  | -31.218 | 1.00 | 0.00 | D | C |
| ATOM | 18711 | O GLN B 701   | -28.335 | 5.723  | -30.580 | 1.00 | 0.00 | D | O |
| ATOM | 18712 | N ARG B 702   | -26.867 | 6.921  | -31.791 | 1.00 | 0.00 | D | N |
| ATOM | 18713 | CA ARG B 702  | -27.679 | 8.090  | -31.670 | 1.00 | 0.00 | D | C |
| ATOM | 18714 | CB ARG B 702  | -27.023 | 9.339  | -32.292 | 1.00 | 0.00 | D | C |

ATOM 18715 CG ARG B 702 -27.855 10.616 -32.133 1.00 0.00 D C  
ATOM 18716 CD ARG B 702 -27.026 11.902 -32.114 1.00 0.00 D C  
ATOM 18717 NE ARG B 702 -26.608 12.245 -33.502 1.00 0.00 D N  
ATOM 18718 CZ ARG B 702 -26.109 13.490 -33.746 1.00 0.00 D C  
ATOM 18719 NH1 ARG B 702 -25.979 14.381 -32.717 1.00 0.00 D N  
ATOM 18720 NH2 ARG B 702 -25.727 13.849 -35.003 1.00 0.00 D N  
ATOM 18721 C ARG B 702 -28.988 7.805 -32.345 1.00 0.00 D C  
ATOM 18722 O ARG B 702 -30.047 8.114 -31.806 1.00 0.00 D O  
ATOM 18723 N ALA B 703 -28.957 7.145 -33.516 1.00 0.00 D N  
ATOM 18724 CA ALA B 703 -30.166 6.879 -34.242 1.00 0.00 D C  
ATOM 18725 CB ALA B 703 -29.933 6.102 -35.547 1.00 0.00 D C  
ATOM 18726 C ALA B 703 -31.068 6.050 -33.388 1.00 0.00 D C  
ATOM 18727 O ALA B 703 -32.282 6.244 -33.375 1.00 0.00 D O  
ATOM 18728 N ILE B 704 -30.494 5.085 -32.651 1.00 0.00 D N  
ATOM 18729 CA ILE B 704 -31.293 4.244 -31.812 1.00 0.00 D C  
ATOM 18730 CB ILE B 704 -30.494 3.195 -31.095 1.00 0.00 D C  
ATOM 18731 CG2 ILE B 704 -31.416 2.505 -30.077 1.00 0.00 D C  
ATOM 18732 CG1 ILE B 704 -29.854 2.225 -32.100 1.00 0.00 D C  
ATOM 18733 CD ILE B 704 -28.821 1.294 -31.465 1.00 0.00 D C  
ATOM 18734 C ILE B 704 -31.945 5.089 -30.763 1.00 0.00 D C  
ATOM 18735 O ILE B 704 -33.123 4.908 -30.462 1.00 0.00 D O  
ATOM 18736 N THR B 705 -31.195 6.040 -30.172 1.00 0.00 D N  
ATOM 18737 CA THR B 705 -31.765 6.816 -29.108 1.00 0.00 D C  
ATOM 18738 CB THR B 705 -30.801 7.745 -28.421 1.00 0.00 D C  
ATOM 18739 OG1 THR B 705 -31.330 8.125 -27.160 1.00 0.00 D O  
ATOM 18740 CG2 THR B 705 -30.589 9.005 -29.276 1.00 0.00 D C  
ATOM 18741 C THR B 705 -32.906 7.619 -29.648 1.00 0.00 D C  
ATOM 18742 O THR B 705 -33.927 7.772 -28.984 1.00 0.00 D O  
ATOM 18743 N ILE B 706 -32.757 8.161 -30.871 1.00 0.00 D N  
ATOM 18744 CA ILE B 706 -33.791 8.970 -31.449 1.00 0.00 D C  
ATOM 18745 CB ILE B 706 -33.369 9.622 -32.731 1.00 0.00 D C  
ATOM 18746 CG2 ILE B 706 -34.613 10.239 -33.388 1.00 0.00 D C  
ATOM 18747 CG1 ILE B 706 -32.235 10.628 -32.460 1.00 0.00 D C  
ATOM 18748 CD ILE B 706 -31.570 11.178 -33.720 1.00 0.00 D C  
ATOM 18749 C ILE B 706 -35.014 8.152 -31.721 1.00 0.00 D C  
ATOM 18750 O ILE B 706 -36.130 8.573 -31.432 1.00 0.00 D O  
ATOM 18751 N LEU B 707 -34.844 6.945 -32.292 1.00 0.00 D N  
ATOM 18752 CA LEU B 707 -35.994 6.180 -32.674 1.00 0.00 D C

|      |       |     |     |   |     |         |        |         |      |      |   |   |
|------|-------|-----|-----|---|-----|---------|--------|---------|------|------|---|---|
| ATOM | 18753 | CB  | LEU | B | 707 | -35.648 | 5.072  | -33.677 | 1.00 | 0.00 | D | C |
| ATOM | 18754 | CG  | LEU | B | 707 | -35.102 | 5.769  | -34.943 | 1.00 | 0.00 | D | C |
| ATOM | 18755 | CD1 | LEU | B | 707 | -35.034 | 4.855  | -36.174 | 1.00 | 0.00 | D | C |
| ATOM | 18756 | CD2 | LEU | B | 707 | -35.876 | 7.072  | -35.201 | 1.00 | 0.00 | D | C |
| ATOM | 18757 | C   | LEU | B | 707 | -36.784 | 5.717  | -31.484 | 1.00 | 0.00 | D | C |
| ATOM | 18758 | O   | LEU | B | 707 | -38.013 | 5.709  | -31.522 | 1.00 | 0.00 | D | O |
| ATOM | 18759 | N   | ASP | B | 708 | -36.114 | 5.339  | -30.379 | 1.00 | 0.00 | D | N |
| ATOM | 18760 | CA  | ASP | B | 708 | -36.836 | 4.884  | -29.221 | 1.00 | 0.00 | D | C |
| ATOM | 18761 | CB  | ASP | B | 708 | -35.900 | 4.466  | -28.074 | 1.00 | 0.00 | D | C |
| ATOM | 18762 | CG  | ASP | B | 708 | -35.141 | 3.213  | -28.493 | 1.00 | 0.00 | D | C |
| ATOM | 18763 | OD1 | ASP | B | 708 | -35.492 | 2.634  | -29.556 | 1.00 | 0.00 | D | O |
| ATOM | 18764 | OD2 | ASP | B | 708 | -34.202 | 2.816  | -27.751 | 1.00 | 0.00 | D | O |
| ATOM | 18765 | C   | ASP | B | 708 | -37.694 | 6.002  | -28.713 | 1.00 | 0.00 | D | C |
| ATOM | 18766 | O   | ASP | B | 708 | -38.863 | 5.801  | -28.385 | 1.00 | 0.00 | D | O |
| ATOM | 18767 | N   | THR | B | 709 | -37.139 | 7.229  | -28.647 | 1.00 | 0.00 | D | N |
| ATOM | 18768 | CA  | THR | B | 709 | -37.901 | 8.325  | -28.118 | 1.00 | 0.00 | D | C |
| ATOM | 18769 | CB  | THR | B | 709 | -37.121 | 9.601  | -27.960 | 1.00 | 0.00 | D | C |
| ATOM | 18770 | OG1 | THR | B | 709 | -37.868 | 10.528 | -27.183 | 1.00 | 0.00 | D | O |
| ATOM | 18771 | CG2 | THR | B | 709 | -36.834 | 10.202 | -29.345 | 1.00 | 0.00 | D | C |
| ATOM | 18772 | C   | THR | B | 709 | -39.054 | 8.591  | -29.031 | 1.00 | 0.00 | D | C |
| ATOM | 18773 | O   | THR | B | 709 | -40.159 | 8.875  | -28.575 | 1.00 | 0.00 | D | O |
| ATOM | 18774 | N   | GLU | B | 710 | -38.837 | 8.485  | -30.357 | 1.00 | 0.00 | D | N |
| ATOM | 18775 | CA  | GLU | B | 710 | -39.895 | 8.784  | -31.276 | 1.00 | 0.00 | D | C |
| ATOM | 18776 | CB  | GLU | B | 710 | -39.514 | 8.593  | -32.755 | 1.00 | 0.00 | D | C |
| ATOM | 18777 | CG  | GLU | B | 710 | -40.672 | 8.925  | -33.706 | 1.00 | 0.00 | D | C |
| ATOM | 18778 | CD  | GLU | B | 710 | -40.316 | 8.456  | -35.110 | 1.00 | 0.00 | D | C |
| ATOM | 18779 | OE1 | GLU | B | 710 | -39.246 | 7.813  | -35.270 | 1.00 | 0.00 | D | O |
| ATOM | 18780 | OE2 | GLU | B | 710 | -41.119 | 8.730  | -36.045 | 1.00 | 0.00 | D | O |
| ATOM | 18781 | C   | GLU | B | 710 | -41.040 | 7.862  | -31.015 | 1.00 | 0.00 | D | C |
| ATOM | 18782 | O   | GLU | B | 710 | -42.190 | 8.301  | -30.986 | 1.00 | 0.00 | D | O |
| ATOM | 18783 | N   | LYS | B | 711 | -40.769 | 6.556  | -30.825 | 1.00 | 0.00 | D | N |
| ATOM | 18784 | CA  | LYS | B | 711 | -41.846 | 5.632  | -30.602 | 1.00 | 0.00 | D | C |
| ATOM | 18785 | CB  | LYS | B | 711 | -41.402 | 4.161  | -30.571 | 1.00 | 0.00 | D | C |
| ATOM | 18786 | CG  | LYS | B | 711 | -41.080 | 3.587  | -31.953 | 1.00 | 0.00 | D | C |
| ATOM | 18787 | CD  | LYS | B | 711 | -42.269 | 3.603  | -32.920 | 1.00 | 0.00 | D | C |
| ATOM | 18788 | CE  | LYS | B | 711 | -42.133 | 4.621  | -34.056 | 1.00 | 0.00 | D | C |
| ATOM | 18789 | NZ  | LYS | B | 711 | -42.035 | 5.992  | -33.508 | 1.00 | 0.00 | D | N |
| ATOM | 18790 | C   | LYS | B | 711 | -42.542 | 5.926  | -29.298 | 1.00 | 0.00 | D | C |

|      |       |     |           |         |        |         |      |      |   |   |
|------|-------|-----|-----------|---------|--------|---------|------|------|---|---|
| ATOM | 18791 | O   | LYS B 711 | -43.769 | 5.886  | -29.231 | 1.00 | 0.00 | D | O |
| ATOM | 18792 | N   | SER B 712 | -41.771 | 6.209  | -28.228 | 1.00 | 0.00 | D | N |
| ATOM | 18793 | CA  | SER B 712 | -42.277 | 6.444  | -26.894 | 1.00 | 0.00 | D | C |
| ATOM | 18794 | CB  | SER B 712 | -41.185 | 6.280  | -25.820 | 1.00 | 0.00 | D | C |
| ATOM | 18795 | OG  | SER B 712 | -41.734 | 6.505  | -24.529 | 1.00 | 0.00 | D | O |
| ATOM | 18796 | C   | SER B 712 | -42.846 | 7.827  | -26.755 | 1.00 | 0.00 | D | C |
| ATOM | 18797 | O   | SER B 712 | -43.433 | 8.166  | -25.730 | 1.00 | 0.00 | D | O |
| ATOM | 18798 | N   | PHE B 713 | -42.695 | 8.657  | -27.795 | 1.00 | 0.00 | D | N |
| ATOM | 18799 | CA  | PHE B 713 | -43.098 | 10.037 | -27.807 | 1.00 | 0.00 | D | C |
| ATOM | 18800 | CB  | PHE B 713 | -42.582 | 10.816 | -29.026 | 1.00 | 0.00 | D | C |
| ATOM | 18801 | CG  | PHE B 713 | -42.799 | 12.258 | -28.720 | 1.00 | 0.00 | D | C |
| ATOM | 18802 | CD1 | PHE B 713 | -41.972 | 12.894 | -27.820 | 1.00 | 0.00 | D | C |
| ATOM | 18803 | CE1 | PHE B 713 | -42.147 | 14.224 | -27.520 | 1.00 | 0.00 | D | C |
| ATOM | 18804 | CZ  | PHE B 713 | -43.156 | 14.932 | -28.124 | 1.00 | 0.00 | D | C |
| ATOM | 18805 | CD2 | PHE B 713 | -43.804 | 12.976 | -29.325 | 1.00 | 0.00 | D | C |
| ATOM | 18806 | CE2 | PHE B 713 | -43.983 | 14.306 | -29.028 | 1.00 | 0.00 | D | C |
| ATOM | 18807 | C   | PHE B 713 | -44.594 | 10.134 | -27.783 | 1.00 | 0.00 | D | C |
| ATOM | 18808 | O   | PHE B 713 | -45.138 | 11.224 | -27.606 | 1.00 | 0.00 | D | O |
| ATOM | 18809 | N   | LEU B 714 | -45.294 | 9.000  | -27.976 | 1.00 | 0.00 | D | N |
| ATOM | 18810 | CA  | LEU B 714 | -46.720 | 8.957  | -28.161 | 1.00 | 0.00 | D | C |
| ATOM | 18811 | CB  | LEU B 714 | -47.546 | 9.950  | -27.318 | 1.00 | 0.00 | D | C |
| ATOM | 18812 | CG  | LEU B 714 | -47.729 | 9.562  | -25.839 | 1.00 | 0.00 | D | C |
| ATOM | 18813 | CD1 | LEU B 714 | -48.544 | 8.266  | -25.711 | 1.00 | 0.00 | D | C |
| ATOM | 18814 | CD2 | LEU B 714 | -46.396 | 9.517  | -25.078 | 1.00 | 0.00 | D | C |
| ATOM | 18815 | C   | LEU B 714 | -46.997 | 9.254  | -29.586 | 1.00 | 0.00 | D | C |
| ATOM | 18816 | O   | LEU B 714 | -48.144 | 9.483  | -29.968 | 1.00 | 0.00 | D | O |
| ATOM | 18817 | N   | LYS B 715 | -45.932 | 9.221  | -30.411 | 1.00 | 0.00 | D | N |
| ATOM | 18818 | CA  | LYS B 715 | -46.112 | 9.348  | -31.824 | 1.00 | 0.00 | D | C |
| ATOM | 18819 | CB  | LYS B 715 | -47.002 | 8.210  | -32.335 | 1.00 | 0.00 | D | C |
| ATOM | 18820 | CG  | LYS B 715 | -46.484 | 6.852  | -31.855 | 1.00 | 0.00 | D | C |
| ATOM | 18821 | CD  | LYS B 715 | -47.560 | 5.767  | -31.794 | 1.00 | 0.00 | D | C |
| ATOM | 18822 | CE  | LYS B 715 | -47.160 | 4.574  | -30.923 | 1.00 | 0.00 | D | C |
| ATOM | 18823 | NZ  | LYS B 715 | -48.354 | 3.771  | -30.580 | 1.00 | 0.00 | D | N |
| ATOM | 18824 | C   | LYS B 715 | -46.800 | 10.644 | -32.046 | 1.00 | 0.00 | D | C |
| ATOM | 18825 | O   | LYS B 715 | -47.660 | 10.770 | -32.916 | 1.00 | 0.00 | D | O |
| ATOM | 18826 | N   | CYS B 716 | -46.416 | 11.655 | -31.249 | 1.00 | 0.00 | D | N |
| ATOM | 18827 | CA  | CYS B 716 | -47.050 | 12.928 | -31.367 | 1.00 | 0.00 | D | C |
| ATOM | 18828 | CB  | CYS B 716 | -46.613 | 13.950 | -30.307 | 1.00 | 0.00 | D | C |

ATOM 18829 SG CYS B 716 -47.114 13.476 -28.625 1.00 0.00 D S  
ATOM 18830 C CYS B 716 -46.687 13.465 -32.709 1.00 0.00 D C  
ATOM 18831 O CYS B 716 -45.857 12.885 -33.408 1.00 0.00 D O  
ATOM 18832 N MET B 717 -47.333 14.576 -33.108 1.00 0.00 D N  
ATOM 18833 CA MET B 717 -47.092 15.131 -34.408 1.00 0.00 D C  
ATOM 18834 CB MET B 717 -47.754 16.496 -34.647 1.00 0.00 D C  
ATOM 18835 CG MET B 717 -47.298 17.137 -35.961 1.00 0.00 D C  
ATOM 18836 SD MET B 717 -47.800 18.867 -36.193 1.00 0.00 D S  
ATOM 18837 CE MET B 717 -46.771 19.122 -37.669 1.00 0.00 D C  
ATOM 18838 C MET B 717 -45.631 15.370 -34.547 1.00 0.00 D C  
ATOM 18839 O MET B 717 -44.992 15.939 -33.664 1.00 0.00 D O  
ATOM 18840 N ARG B 718 -45.073 14.915 -35.683 1.00 0.00 D N  
ATOM 18841 CA ARG B 718 -43.687 15.097 -35.981 1.00 0.00 D C  
ATOM 18842 CB ARG B 718 -42.784 14.133 -35.192 1.00 0.00 D C  
ATOM 18843 CG ARG B 718 -41.289 14.272 -35.471 1.00 0.00 D C  
ATOM 18844 CD ARG B 718 -40.454 13.302 -34.634 1.00 0.00 D C  
ATOM 18845 NE ARG B 718 -40.536 13.766 -33.219 1.00 0.00 D N  
ATOM 18846 CZ ARG B 718 -40.330 12.881 -32.200 1.00 0.00 D C  
ATOM 18847 NH1 ARG B 718 -40.075 11.568 -32.480 1.00 0.00 D N  
ATOM 18848 NH2 ARG B 718 -40.360 13.310 -30.905 1.00 0.00 D N  
ATOM 18849 C ARG B 718 -43.539 14.781 -37.430 1.00 0.00 D C  
ATOM 18850 O ARG B 718 -44.375 14.078 -37.995 1.00 0.00 D O  
ATOM 18851 C LYS B 719 -41.492 13.673 -39.500 1.00 0.00 D C  
ATOM 18852 OT1 LYS B 719 -41.192 13.464 -38.569 0.00 0.00 D O  
ATOM 18853 OT2 LYS B 719 -41.405 13.359 -40.446 0.00 0.00 D O  
ATOM 18854 N LYS B 719 -42.492 15.306 -38.099 1.00 0.00 D N  
ATOM 18855 CA LYS B 719 -42.396 14.893 -39.465 1.00 0.00 D C  
ATOM 18856 CB LYS B 719 -41.810 15.901 -40.460 1.00 0.00 D C  
ATOM 18857 CG LYS B 719 -41.794 15.269 -41.856 1.00 0.00 D C  
ATOM 18858 CD LYS B 719 -43.201 14.931 -42.362 1.00 0.00 D C  
ATOM 18859 CE LYS B 719 -43.283 13.635 -43.179 1.00 0.00 D C  
ATOM 18860 NZ LYS B 719 -42.418 13.720 -44.375 1.00 0.00 D N  
END
